# Supplementary material for: Predicting Chemical Toxicity Effects Based on Chemical-Chemical Interactions
Source: PubMed Central journal article supplement (PMC3574107; doi:10.1371/journal.pone.0056517), 2013-02-15
Supplement: pone.0056517.s001.pdf [file pone.0056517.s001.pdf]

**Table S1:** 17,233 compounds investigated in this study and their toxicity information. We use "A××××" to represent each compound due to the copyright of the data.

| Compound | Toxicity                                                                                     |
|----------|----------------------------------------------------------------------------------------------|
| A00001   | Acute Toxicity                                                                               |
| A00002   | Acute Toxicity, Mutagenicity, Skin and Eye Irritation, Reproductive Effects                  |
| A00003   | Acute Toxicity, Mutagenicity, Tumorigenicity, Skin and Eye Irritation, Multiple Dose Effects |
| A00004   | Acute Toxicity, Mutagenicity, Tumorigenicity, Skin and Eye Irritation,                       |
| A00005   | Acute Toxicity, Mutagenicity, Tumorigenicity, Skin and Eye Irritation,                       |
| A00006   | Acute Toxicity, Multiple Dose Effects                                                        |
| A00007   | Acute Toxicity, Mutagenicity, Tumorigenicity, Multiple Dose Effects                          |
| A00008   | Acute Toxicity, Mutagenicity, Tumorigenicity, Skin and Eye Irritation,                       |
| A00009   | Non-toxicity                                                                                 |
| A00010   | Acute Toxicity, Multiple Dose Effects                                                        |
| A00011   | Non-toxicity                                                                                 |
| A00012   | Mutagenicity                                                                                 |
| A00013   | Acute Toxicity, Mutagenicity, Multiple Dose Effects                                          |
| A00014   | Non-toxicity                                                                                 |
| A00015   | Acute Toxicity, Mutagenicity, Tumorigenicity, Multiple Dose Effects                          |
| A00016   | Non-toxicity                                                                                 |
| A00017   | Acute Toxicity, Multiple Dose Effects                                                        |
| A00018   | Mutagenicity, Tumorigenicity                                                                 |
| A00019   | Mutagenicity, Tumorigenicity                                                                 |
| A00020   | Acute Toxicity                                                                               |
| A00021   | Non-toxicity                                                                                 |
| A00022   | Mutagenicity                                                                                 |
| A00023   | Mutagenicity                                                                                 |
| A00024   | Skin and Eye Irritation, Multiple Dose Effects                                               |
| A00025   | Non-toxicity                                                                                 |
| A00026   | Acute Toxicity, Mutagenicity                                                                 |
| A00027   | Non-toxicity                                                                                 |
| A00028   | Non-toxicity                                                                                 |
| A00029   | Acute Toxicity, Tumorigenicity, Multiple Dose Effects                                        |
| A00030   | Acute Toxicity, Mutagenicity, Skin and Eye Irritation, Multiple Dose Effects                 |
| A00031   | Acute Toxicity, Mutagenicity, Skin and Eye Irritation                                        |
| A00032   | Acute Toxicity                                                                               |
| A00033   | Acute Toxicity, Skin and Eye Irritation                                                      |
| A00034   | Acute Toxicity, Mutagenicity, Skin and Eye Irritation, Multiple Dose Effects                 |
| A00035   | Acute Toxicity, Mutagenicity, Skin and Eye Irritation                                        |
| A00036   | Non-toxicity                                                                                 |
| A00037   | Acute Toxicity, Reproductive Effects, Multiple Dose Effects                                  |
| A00038   | Mutagenicity                                                                                 |
| A00039   | Non-toxicity                                                                                 |
| A00040   | Acute Toxicity, Mutagenicity, Tumorigenicity, Skin and Eye Irritation,                       |

|        |                                                                                                    |
|--------|----------------------------------------------------------------------------------------------------|
| A00041 | Non-toxicity                                                                                       |
| A00042 | Acute Toxicity, Mutagenicity, Tumorigenicity, Skin and Eye Irritation,                             |
| A00043 | Acute Toxicity, Mutagenicity, Tumorigenicity, Reproductive Effects                                 |
| A00044 | Acute Toxicity, Mutagenicity, Skin and Eye Irritation, Reproductive Effects, Multiple Dose Effects |
| A00045 | Acute Toxicity, Mutagenicity, Skin and Eye Irritation, Reproductive Effects, Multiple Dose Effects |
| A00046 | Non-toxicity                                                                                       |
| A00047 | Acute Toxicity                                                                                     |
| A00048 | Acute Toxicity, Mutagenicity, Skin and Eye Irritation, Multiple Dose Effects                       |
| A00049 | Non-toxicity                                                                                       |
| A00050 | Tumorigenicity, Skin and Eye Irritation                                                            |
| A00051 | Acute Toxicity                                                                                     |
| A00052 | Acute Toxicity, Mutagenicity, Tumorigenicity, Skin and Eye Irritation, Multiple Dose Effects       |
| A00053 | Acute Toxicity, Mutagenicity, Tumorigenicity, Reproductive Effects                                 |
| A00054 | Acute Toxicity, Mutagenicity, Reproductive Effects                                                 |
| A00055 | Acute Toxicity, Mutagenicity, Tumorigenicity, Reproductive Effects,                                |
| A00056 | Acute Toxicity, Mutagenicity, Tumorigenicity, Skin and Eye Irritation, Multiple Dose Effects       |
| A00057 | Acute Toxicity, Mutagenicity, Tumorigenicity, Skin and Eye Irritation,                             |
| A00058 | Acute Toxicity, Multiple Dose Effects                                                              |
| A00059 | Non-toxicity                                                                                       |
| A00060 | Acute Toxicity                                                                                     |
| A00061 | Acute Toxicity, Mutagenicity, Skin and Eye Irritation, Multiple Dose Effects                       |
| A00062 | Acute Toxicity, Mutagenicity, Skin and Eye Irritation                                              |
| A00063 | Acute Toxicity, Mutagenicity, Skin and Eye Irritation, Reproductive Effects, Multiple Dose Effects |
| A00064 | Acute Toxicity, Mutagenicity, Skin and Eye Irritation, Multiple Dose Effects                       |
| A00065 | Acute Toxicity, Mutagenicity                                                                       |
| A00066 | Non-toxicity                                                                                       |
| A00067 | Acute Toxicity, Reproductive Effects, Multiple Dose Effects                                        |
| A00068 | Acute Toxicity, Mutagenicity, Reproductive Effects, Multiple Dose Effects                          |
| A00069 | Acute Toxicity, Mutagenicity, Tumorigenicity, Skin and Eye Irritation,                             |
| A00070 | Acute Toxicity, Multiple Dose Effects                                                              |
| A00071 | Acute Toxicity, Mutagenicity, Tumorigenicity, Multiple Dose Effects                                |
| A00072 | Acute Toxicity, Reproductive Effects                                                               |
| A00073 | Acute Toxicity, Mutagenicity, Tumorigenicity, Multiple Dose Effects                                |
| A00074 | Acute Toxicity, Mutagenicity, Tumorigenicity, Skin and Eye Irritation, Multiple Dose Effects       |
| A00075 | Non-toxicity                                                                                       |
| A00076 | Acute Toxicity, Mutagenicity, Tumorigenicity, Skin and Eye Irritation,                             |
| A00077 | Acute Toxicity, Skin and Eye Irritation                                                            |
| A00078 | Acute Toxicity, Skin and Eye Irritation                                                            |
| A00079 | Mutagenicity, Skin and Eye Irritation, Reproductive Effects                                        |
| A00080 | Acute Toxicity, Mutagenicity, Tumorigenicity, Reproductive Effects,                                |

|        |                                                                                                    |
|--------|----------------------------------------------------------------------------------------------------|
| A00081 | Acute Toxicity, Mutagenicity, Skin and Eye Irritation, Reproductive Effects, Multiple Dose Effects |
| A00082 | Non-toxicity                                                                                       |
| A00083 | Acute Toxicity                                                                                     |
| A00084 | Acute Toxicity                                                                                     |
| A00085 | Acute Toxicity, Mutagenicity, Tumorigenicity, Reproductive Effects,                                |
| A00086 | Acute Toxicity, Multiple Dose Effects                                                              |
| A00087 | Acute Toxicity, Mutagenicity, Tumorigenicity, Skin and Eye Irritation,                             |
| A00088 | Multiple Dose Effects                                                                              |
| A00089 | Acute Toxicity, Mutagenicity, Tumorigenicity, Skin and Eye Irritation,                             |
| A00090 | Acute Toxicity, Mutagenicity, Skin and Eye Irritation, Reproductive Effects                        |
| A00091 | Acute Toxicity                                                                                     |
| A00092 | Acute Toxicity, Mutagenicity, Tumorigenicity, Skin and Eye Irritation,                             |
| A00093 | Acute Toxicity                                                                                     |
| A00094 | Acute Toxicity, Skin and Eye Irritation, Reproductive Effects, Multiple Dose                       |
| A00095 | Acute Toxicity, Mutagenicity, Skin and Eye Irritation, Reproductive Effects, Multiple Dose Effects |
| A00096 | Acute Toxicity                                                                                     |
| A00097 | Mutagenicity                                                                                       |
| A00098 | Acute Toxicity, Multiple Dose Effects                                                              |
| A00099 | Acute Toxicity, Multiple Dose Effects                                                              |
| A00100 | Acute Toxicity, Mutagenicity, Tumorigenicity, Skin and Eye Irritation,                             |
| A00101 | Non-toxicity                                                                                       |
| A00102 | Non-toxicity                                                                                       |
| A00103 | Non-toxicity                                                                                       |
| A00104 | Non-toxicity                                                                                       |
| A00105 | Acute Toxicity, Multiple Dose Effects                                                              |
| A00106 | Acute Toxicity, Mutagenicity                                                                       |
| A00107 | Non-toxicity                                                                                       |
| A00108 | Acute Toxicity                                                                                     |
| A00109 | Acute Toxicity, Mutagenicity, Skin and Eye Irritation                                              |
| A00110 | Acute Toxicity, Mutagenicity                                                                       |
| A00111 | Acute Toxicity, Mutagenicity, Skin and Eye Irritation, Multiple Dose Effects                       |
| A00112 | Acute Toxicity                                                                                     |
| A00113 | Acute Toxicity                                                                                     |
| A00114 | Acute Toxicity                                                                                     |
| A00115 | Non-toxicity                                                                                       |
| A00116 | Non-toxicity                                                                                       |
| A00117 | Non-toxicity                                                                                       |
| A00118 | Acute Toxicity, Multiple Dose Effects                                                              |
| A00119 | Non-toxicity                                                                                       |
| A00120 | Non-toxicity                                                                                       |
| A00121 | Non-toxicity                                                                                       |
| A00122 | Acute Toxicity, Mutagenicity, Skin and Eye Irritation, Multiple Dose Effects                       |
| A00123 | Acute Toxicity, Mutagenicity, Skin and Eye Irritation, Multiple Dose Effects                       |
| A00124 | Acute Toxicity, Mutagenicity, Multiple Dose Effects                                                |

|        |                                                                                                      |
|--------|------------------------------------------------------------------------------------------------------|
| A00125 | Acute Toxicity, Mutagenicity                                                                         |
| A00126 | Acute Toxicity                                                                                       |
| A00127 | Mutagenicity                                                                                         |
| A00128 | Non-toxicity                                                                                         |
| A00129 | Non-toxicity                                                                                         |
| A00130 | Acute Toxicity, Tumorigenicity, Skin and Eye Irritation, Reproductive Effects, Multiple Dose Effects |
| A00131 | Acute Toxicity, Mutagenicity                                                                         |
| A00132 | Non-toxicity                                                                                         |
| A00133 | Mutagenicity, Multiple Dose Effects                                                                  |
| A00134 | Mutagenicity                                                                                         |
| A00135 | Acute Toxicity                                                                                       |
| A00136 | Mutagenicity, Multiple Dose Effects                                                                  |
| A00137 | Acute Toxicity                                                                                       |
| A00138 | Acute Toxicity, Mutagenicity, Skin and Eye Irritation, Reproductive Effects, Multiple Dose Effects   |
| A00139 | Mutagenicity                                                                                         |
| A00140 | Mutagenicity, Tumorigenicity                                                                         |
| A00141 | Acute Toxicity, Mutagenicity, Skin and Eye Irritation, Multiple Dose Effects                         |
| A00142 | Acute Toxicity                                                                                       |
| A00143 | Mutagenicity                                                                                         |
| A00144 | Acute Toxicity, Mutagenicity, Tumorigenicity, Skin and Eye Irritation, Multiple Dose Effects         |
| A00145 | Acute Toxicity, Mutagenicity, Tumorigenicity, Skin and Eye Irritation                                |
| A00146 | Acute Toxicity                                                                                       |
| A00147 | Acute Toxicity, Mutagenicity, Skin and Eye Irritation, Multiple Dose Effects                         |
| A00148 | Acute Toxicity                                                                                       |
| A00149 | Acute Toxicity, Mutagenicity, Tumorigenicity, Skin and Eye Irritation,                               |
| A00150 | Acute Toxicity, Mutagenicity, Reproductive Effects, Multiple Dose Effects                            |
| A00151 | Acute Toxicity, Mutagenicity, Skin and Eye Irritation, Reproductive Effects, Multiple Dose Effects   |
| A00152 | Acute Toxicity, Mutagenicity, Tumorigenicity, Skin and Eye Irritation,                               |
| A00153 | Acute Toxicity, Mutagenicity, Tumorigenicity, Skin and Eye Irritation,                               |
| A00154 | Acute Toxicity, Mutagenicity, Skin and Eye Irritation, Reproductive Effects, Multiple Dose Effects   |
| A00155 | Acute Toxicity, Mutagenicity, Tumorigenicity, Reproductive Effects,                                  |
| A00156 | Acute Toxicity, Skin and Eye Irritation, Reproductive Effects, Multiple Dose                         |
| A00157 | Acute Toxicity, Mutagenicity, Tumorigenicity, Skin and Eye Irritation,                               |
| A00158 | Acute Toxicity, Mutagenicity                                                                         |
| A00159 | Acute Toxicity, Mutagenicity, Tumorigenicity, Skin and Eye Irritation,                               |
| A00160 | Acute Toxicity, Mutagenicity                                                                         |
| A00161 | Acute Toxicity, Skin and Eye Irritation, Reproductive Effects, Multiple Dose                         |
| A00162 | Acute Toxicity, Mutagenicity                                                                         |
| A00163 | Acute Toxicity, Multiple Dose Effects                                                                |
| A00164 | Non-toxicity                                                                                         |
| A00165 | Acute Toxicity, Mutagenicity                                                                         |

|        |                                                                                                    |
|--------|----------------------------------------------------------------------------------------------------|
| A00166 | Mutagenicity, Multiple Dose Effects                                                                |
| A00167 | Acute Toxicity, Mutagenicity, Tumorigenicity, Skin and Eye Irritation, Multiple Dose Effects       |
| A00168 | Acute Toxicity, Mutagenicity, Tumorigenicity, Skin and Eye Irritation,                             |
| A00169 | Acute Toxicity, Mutagenicity                                                                       |
| A00170 | Non-toxicity                                                                                       |
| A00171 | Acute Toxicity, Mutagenicity, Tumorigenicity, Skin and Eye Irritation,                             |
| A00172 | Non-toxicity                                                                                       |
| A00173 | Acute Toxicity, Mutagenicity, Tumorigenicity, Skin and Eye Irritation, Multiple Dose Effects       |
| A00174 | Tumorigenicity                                                                                     |
| A00175 | Acute Toxicity, Mutagenicity                                                                       |
| A00176 | Acute Toxicity, Mutagenicity, Tumorigenicity, Skin and Eye Irritation,                             |
| A00177 | Acute Toxicity, Mutagenicity, Tumorigenicity                                                       |
| A00178 | Acute Toxicity, Mutagenicity                                                                       |
| A00179 | Acute Toxicity, Reproductive Effects                                                               |
| A00180 | Acute Toxicity, Mutagenicity                                                                       |
| A00181 | Acute Toxicity, Mutagenicity, Reproductive Effects, Multiple Dose Effects                          |
| A00182 | Acute Toxicity                                                                                     |
| A00183 | Acute Toxicity, Reproductive Effects, Multiple Dose Effects                                        |
| A00184 | Mutagenicity                                                                                       |
| A00185 | Acute Toxicity, Mutagenicity                                                                       |
| A00186 | Non-toxicity                                                                                       |
| A00187 | Acute Toxicity, Mutagenicity, Tumorigenicity, Reproductive Effects,                                |
| A00188 | Acute Toxicity, Mutagenicity, Multiple Dose Effects                                                |
| A00189 | Acute Toxicity, Mutagenicity, Tumorigenicity, Skin and Eye Irritation, Multiple Dose Effects       |
| A00190 | Acute Toxicity, Mutagenicity, Tumorigenicity, Skin and Eye Irritation,                             |
| A00191 | Acute Toxicity, Mutagenicity, Tumorigenicity, Reproductive Effects,                                |
| A00192 | Non-toxicity                                                                                       |
| A00193 | Acute Toxicity, Mutagenicity, Skin and Eye Irritation                                              |
| A00194 | Acute Toxicity                                                                                     |
| A00195 | Non-toxicity                                                                                       |
| A00196 | Acute Toxicity, Mutagenicity, Tumorigenicity, Skin and Eye Irritation,                             |
| A00197 | Mutagenicity, Tumorigenicity                                                                       |
| A00198 | Acute Toxicity, Mutagenicity, Tumorigenicity, Skin and Eye Irritation, Multiple Dose Effects       |
| A00199 | Acute Toxicity                                                                                     |
| A00200 | Acute Toxicity                                                                                     |
| A00201 | Acute Toxicity, Mutagenicity, Tumorigenicity, Reproductive Effects,                                |
| A00202 | Acute Toxicity, Mutagenicity, Tumorigenicity, Skin and Eye Irritation,                             |
| A00203 | Acute Toxicity                                                                                     |
| A00204 | Acute Toxicity, Mutagenicity, Skin and Eye Irritation, Reproductive Effects, Multiple Dose Effects |
| A00205 | Non-toxicity                                                                                       |
| A00206 | Acute Toxicity, Mutagenicity, Tumorigenicity, Multiple Dose Effects                                |

|        |                                                                                                    |
|--------|----------------------------------------------------------------------------------------------------|
| A00207 | Acute Toxicity                                                                                     |
| A00208 | Acute Toxicity, Mutagenicity, Skin and Eye Irritation, Reproductive Effects, Multiple Dose Effects |
| A00209 | Acute Toxicity, Mutagenicity, Reproductive Effects, Multiple Dose Effects                          |
| A00210 | Acute Toxicity, Mutagenicity, Skin and Eye Irritation, Reproductive Effects, Multiple Dose Effects |
| A00211 | Tumorigenicity, Multiple Dose Effects                                                              |
| A00212 | Acute Toxicity, Mutagenicity, Tumorigenicity, Skin and Eye Irritation, Multiple Dose Effects       |
| A00213 | Acute Toxicity                                                                                     |
| A00214 | Acute Toxicity, Mutagenicity, Tumorigenicity, Skin and Eye Irritation                              |
| A00215 | Acute Toxicity, Mutagenicity, Tumorigenicity, Skin and Eye Irritation,                             |
| A00216 | Acute Toxicity, Mutagenicity, Tumorigenicity, Skin and Eye Irritation,                             |
| A00217 | Mutagenicity                                                                                       |
| A00218 | Acute Toxicity, Mutagenicity, Tumorigenicity, Multiple Dose Effects                                |
| A00219 | Acute Toxicity, Mutagenicity, Tumorigenicity, Skin and Eye Irritation,                             |
| A00220 | Acute Toxicity, Skin and Eye Irritation, Multiple Dose Effects                                     |
| A00221 | Acute Toxicity, Skin and Eye Irritation, Reproductive Effects                                      |
| A00222 | Acute Toxicity                                                                                     |
| A00223 | Acute Toxicity                                                                                     |
| A00224 | Non-toxicity                                                                                       |
| A00225 | Non-toxicity                                                                                       |
| A00226 | Acute Toxicity                                                                                     |
| A00227 | Acute Toxicity, Mutagenicity, Reproductive Effects, Multiple Dose Effects                          |
| A00228 | Acute Toxicity, Mutagenicity, Reproductive Effects, Multiple Dose Effects                          |
| A00229 | Non-toxicity                                                                                       |
| A00230 | Acute Toxicity                                                                                     |
| A00231 | Non-toxicity                                                                                       |
| A00232 | Acute Toxicity, Mutagenicity, Tumorigenicity, Skin and Eye Irritation,                             |
| A00233 | Acute Toxicity, Mutagenicity, Tumorigenicity, Skin and Eye Irritation,                             |
| A00234 | Acute Toxicity, Mutagenicity, Skin and Eye Irritation, Multiple Dose Effects                       |
| A00235 | Non-toxicity                                                                                       |
| A00236 | Acute Toxicity, Mutagenicity, Tumorigenicity, Reproductive Effects                                 |
| A00237 | Acute Toxicity, Mutagenicity, Tumorigenicity, Skin and Eye Irritation,                             |
| A00238 | Acute Toxicity, Reproductive Effects, Multiple Dose Effects                                        |
| A00239 | Acute Toxicity                                                                                     |
| A00240 | Acute Toxicity, Mutagenicity, Skin and Eye Irritation                                              |
| A00241 | Non-toxicity                                                                                       |
| A00242 | Acute Toxicity, Skin and Eye Irritation                                                            |
| A00243 | Acute Toxicity, Mutagenicity, Skin and Eye Irritation, Reproductive Effects, Multiple Dose Effects |
| A00244 | Acute Toxicity                                                                                     |
| A00245 | Acute Toxicity, Mutagenicity, Tumorigenicity, Skin and Eye Irritation,                             |
| A00246 | Acute Toxicity                                                                                     |
| A00247 | Acute Toxicity, Skin and Eye Irritation, Reproductive Effects, Multiple Dose                       |
| A00248 | Acute Toxicity, Skin and Eye Irritation, Multiple Dose Effects                                     |

|        |                                                                                                 |
|--------|-------------------------------------------------------------------------------------------------|
| A00249 | Non-toxicity                                                                                    |
| A00250 | Acute Toxicity, Mutagenicity                                                                    |
| A00251 | Mutagenicity, Tumorigenicity, Reproductive Effects, Multiple Dose Effects                       |
| A00252 | Acute Toxicity, Mutagenicity, Multiple Dose Effects                                             |
| A00253 | Acute Toxicity, Mutagenicity, Multiple Dose Effects                                             |
| A00254 | Acute Toxicity, Mutagenicity, Skin and Eye Irritation, Multiple Dose Effects                    |
| A00255 | Acute Toxicity                                                                                  |
| A00256 | Acute Toxicity, Mutagenicity, Tumorigenicity, Skin and Eye Irritation,                          |
| A00257 | Acute Toxicity, Mutagenicity, Reproductive Effects, Multiple Dose Effects                       |
| A00258 | Non-toxicity                                                                                    |
| A00259 | Acute Toxicity                                                                                  |
| A00260 | Acute Toxicity                                                                                  |
| A00261 | Non-toxicity                                                                                    |
| A00262 | Acute Toxicity, Mutagenicity, Skin and Eye Irritation, Multiple Dose Effects                    |
| A00263 | Acute Toxicity, Mutagenicity, Tumorigenicity                                                    |
| A00264 | Acute Toxicity, Mutagenicity, Tumorigenicity, Skin and Eye Irritation,                          |
| A00265 | Acute Toxicity, Mutagenicity, Reproductive Effects, Multiple Dose Effects                       |
| A00266 | Non-toxicity                                                                                    |
| A00267 | Acute Toxicity, Mutagenicity, Tumorigenicity                                                    |
| A00268 | Acute Toxicity, Mutagenicity                                                                    |
| A00269 | Acute Toxicity, Mutagenicity, Tumorigenicity, Skin and Eye Irritation,                          |
| A00270 | Mutagenicity, Reproductive Effects, Multiple Dose Effects                                       |
| A00271 | Acute Toxicity, Mutagenicity, Tumorigenicity, Skin and Eye Irritation,                          |
| A00272 | Non-toxicity                                                                                    |
| A00273 | Mutagenicity                                                                                    |
| A00274 | Acute Toxicity, Mutagenicity, Tumorigenicity, Skin and Eye Irritation,                          |
| A00275 | Non-toxicity                                                                                    |
| A00276 | Non-toxicity                                                                                    |
| A00277 | Acute Toxicity                                                                                  |
| A00278 | Acute Toxicity                                                                                  |
| A00279 | Acute Toxicity, Reproductive Effects, Multiple Dose Effects                                     |
| A00280 | Acute Toxicity, Multiple Dose Effects                                                           |
| A00281 | Acute Toxicity                                                                                  |
| A00282 | Acute Toxicity                                                                                  |
| A00283 | Acute Toxicity, Multiple Dose Effects                                                           |
| A00284 | Acute Toxicity                                                                                  |
| A00285 | Acute Toxicity                                                                                  |
| A00286 | Multiple Dose Effects                                                                           |
| A00287 | Acute Toxicity, Reproductive Effects                                                            |
| A00288 | Acute Toxicity, Reproductive Effects, Multiple Dose Effects                                     |
| A00289 | Acute Toxicity                                                                                  |
| A00290 | Acute Toxicity, Mutagenicity, Tumorigenicity, Skin and Eye Irritation,<br>Multiple Dose Effects |
| A00291 | Mutagenicity                                                                                    |
| A00292 | Acute Toxicity, Skin and Eye Irritation                                                         |
| A00293 | Acute Toxicity                                                                                  |

|        |                                                                                                    |
|--------|----------------------------------------------------------------------------------------------------|
| A00294 | Acute Toxicity, Mutagenicity, Tumorigenicity, Reproductive Effects                                 |
| A00295 | Acute Toxicity, Mutagenicity, Tumorigenicity, Reproductive Effects,                                |
| A00296 | Acute Toxicity                                                                                     |
| A00297 | Multiple Dose Effects                                                                              |
| A00298 | Acute Toxicity, Mutagenicity                                                                       |
| A00299 | Acute Toxicity, Multiple Dose Effects                                                              |
| A00300 | Acute Toxicity                                                                                     |
| A00301 | Acute Toxicity, Multiple Dose Effects                                                              |
| A00302 | Acute Toxicity                                                                                     |
| A00303 | Mutagenicity                                                                                       |
| A00304 | Acute Toxicity, Mutagenicity, Reproductive Effects, Multiple Dose Effects                          |
| A00305 | Acute Toxicity                                                                                     |
| A00306 | Mutagenicity, Multiple Dose Effects                                                                |
| A00307 | Acute Toxicity                                                                                     |
| A00308 | Acute Toxicity                                                                                     |
| A00309 | Acute Toxicity, Mutagenicity, Tumorigenicity, Reproductive Effects                                 |
| A00310 | Acute Toxicity, Mutagenicity, Tumorigenicity, Reproductive Effects,                                |
| A00311 | Acute Toxicity, Mutagenicity, Skin and Eye Irritation, Reproductive Effects, Multiple Dose Effects |
| A00312 | Acute Toxicity, Mutagenicity, Tumorigenicity, Skin and Eye Irritation,                             |
| A00313 | Mutagenicity, Reproductive Effects                                                                 |
| A00314 | Acute Toxicity, Mutagenicity, Tumorigenicity, Reproductive Effects,                                |
| A00315 | Acute Toxicity, Reproductive Effects                                                               |
| A00316 | Acute Toxicity, Mutagenicity, Tumorigenicity, Skin and Eye Irritation,                             |
| A00317 | Acute Toxicity                                                                                     |
| A00318 | Acute Toxicity, Mutagenicity, Tumorigenicity, Reproductive Effects,                                |
| A00319 | Acute Toxicity                                                                                     |
| A00320 | Acute Toxicity                                                                                     |
| A00321 | Acute Toxicity, Mutagenicity                                                                       |
| A00322 | Acute Toxicity, Mutagenicity, Tumorigenicity                                                       |
| A00323 | Acute Toxicity                                                                                     |
| A00324 | Acute Toxicity, Mutagenicity, Skin and Eye Irritation, Multiple Dose Effects                       |
| A00325 | Acute Toxicity                                                                                     |
| A00326 | Acute Toxicity, Mutagenicity, Multiple Dose Effects                                                |
| A00327 | Acute Toxicity, Mutagenicity                                                                       |
| A00328 | Acute Toxicity, Mutagenicity, Reproductive Effects, Multiple Dose Effects                          |
| A00329 | Acute Toxicity                                                                                     |
| A00330 | Acute Toxicity, Mutagenicity, Tumorigenicity                                                       |
| A00331 | Acute Toxicity, Mutagenicity, Reproductive Effects, Multiple Dose Effects                          |
| A00332 | Acute Toxicity                                                                                     |
| A00333 | Acute Toxicity                                                                                     |
| A00334 | Acute Toxicity, Mutagenicity                                                                       |
| A00335 | Acute Toxicity                                                                                     |
| A00336 | Acute Toxicity, Mutagenicity                                                                       |
| A00337 | Acute Toxicity                                                                                     |
| A00338 | Acute Toxicity, Mutagenicity, Tumorigenicity, Reproductive Effects,                                |



|        |                                                                                                 |
|--------|-------------------------------------------------------------------------------------------------|
| A00339 | Acute Toxicity                                                                                  |
| A00340 | Acute Toxicity, Mutagenicity, Tumorigenicity, Multiple Dose Effects                             |
| A00341 | Acute Toxicity, Skin and Eye Irritation                                                         |
| A00342 | Acute Toxicity, Mutagenicity, Multiple Dose Effects                                             |
| A00343 | Acute Toxicity, Mutagenicity, Multiple Dose Effects                                             |
| A00344 | Mutagenicity                                                                                    |
| A00345 | Acute Toxicity, Multiple Dose Effects                                                           |
| A00346 | Acute Toxicity                                                                                  |
| A00347 | Reproductive Effects                                                                            |
| A00348 | Acute Toxicity                                                                                  |
| A00349 | Acute Toxicity, Mutagenicity, Skin and Eye Irritation, Reproductive Effects                     |
| A00350 | Acute Toxicity, Mutagenicity, Skin and Eye Irritation, Multiple Dose Effects                    |
| A00351 | Acute Toxicity, Mutagenicity, Tumorigenicity, Reproductive Effects,                             |
| A00352 | Acute Toxicity, Mutagenicity, Tumorigenicity, Reproductive Effects,                             |
| A00353 | Acute Toxicity                                                                                  |
| A00354 | Acute Toxicity, Skin and Eye Irritation                                                         |
| A00355 | Acute Toxicity                                                                                  |
| A00356 | Acute Toxicity, Mutagenicity, Tumorigenicity                                                    |
| A00357 | Acute Toxicity                                                                                  |
| A00358 | Acute Toxicity, Mutagenicity, Reproductive Effects, Multiple Dose Effects                       |
| A00359 | Mutagenicity, Tumorigenicity                                                                    |
| A00360 | Acute Toxicity, Reproductive Effects                                                            |
| A00361 | Mutagenicity, Reproductive Effects                                                              |
| A00362 | Multiple Dose Effects                                                                           |
| A00363 | Mutagenicity                                                                                    |
| A00364 | Acute Toxicity                                                                                  |
| A00365 | Acute Toxicity, Reproductive Effects                                                            |
| A00366 | Acute Toxicity, Mutagenicity, Multiple Dose Effects                                             |
| A00367 | Acute Toxicity                                                                                  |
| A00368 | Acute Toxicity                                                                                  |
| A00369 | Acute Toxicity                                                                                  |
| A00370 | Acute Toxicity, Mutagenicity, Tumorigenicity, Skin and Eye Irritation,<br>Multiple Dose Effects |
| A00371 | Acute Toxicity, Mutagenicity, Tumorigenicity, Multiple Dose Effects                             |
| A00372 | Tumorigenicity, Multiple Dose Effects                                                           |
| A00373 | Acute Toxicity                                                                                  |
| A00374 | Acute Toxicity, Mutagenicity, Reproductive Effects, Multiple Dose Effects                       |
| A00375 | Acute Toxicity, Reproductive Effects, Multiple Dose Effects                                     |
| A00376 | Acute Toxicity, Mutagenicity, Tumorigenicity, Skin and Eye Irritation,                          |
| A00377 | Acute Toxicity, Mutagenicity, Tumorigenicity, Skin and Eye Irritation,                          |
| A00378 | Acute Toxicity, Tumorigenicity, Reproductive Effects, Multiple Dose Effects                     |
| A00379 | Acute Toxicity, Mutagenicity, Tumorigenicity, Skin and Eye Irritation,                          |
| A00380 | Acute Toxicity, Mutagenicity, Tumorigenicity, Reproductive Effects                              |
| A00381 | Acute Toxicity, Mutagenicity, Reproductive Effects                                              |
| A00382 | Acute Toxicity, Multiple Dose Effects                                                           |
| A00383 | Acute Toxicity, Multiple Dose Effects                                                           |

|        |                                                                                                 |
|--------|-------------------------------------------------------------------------------------------------|
| A00384 | Skin and Eye Irritation                                                                         |
| A00385 | Mutagenicity                                                                                    |
| A00386 | Mutagenicity                                                                                    |
| A00387 | Acute Toxicity, Mutagenicity, Tumorigenicity, Reproductive Effects,                             |
| A00388 | Non-toxicity                                                                                    |
| A00389 | Acute Toxicity                                                                                  |
| A00390 | Acute Toxicity, Mutagenicity                                                                    |
| A00391 | Acute Toxicity, Multiple Dose Effects                                                           |
| A00392 | Acute Toxicity                                                                                  |
| A00393 | Multiple Dose Effects                                                                           |
| A00394 | Acute Toxicity                                                                                  |
| A00395 | Acute Toxicity, Mutagenicity, Tumorigenicity, Skin and Eye Irritation,<br>Multiple Dose Effects |
| A00396 | Non-toxicity                                                                                    |
| A00397 | Acute Toxicity, Tumorigenicity, Reproductive Effects, Multiple Dose Effects                     |
| A00398 | Acute Toxicity, Skin and Eye Irritation, Reproductive Effects, Multiple Dose                    |
| A00399 | Acute Toxicity, Multiple Dose Effects                                                           |
| A00400 | Non-toxicity                                                                                    |
| A00401 | Acute Toxicity, Reproductive Effects, Multiple Dose Effects                                     |
| A00402 | Acute Toxicity                                                                                  |
| A00403 | Acute Toxicity                                                                                  |
| A00404 | Acute Toxicity                                                                                  |
| A00405 | Acute Toxicity, Reproductive Effects, Multiple Dose Effects                                     |
| A00406 | Acute Toxicity, Multiple Dose Effects                                                           |
| A00407 | Acute Toxicity                                                                                  |
| A00408 | Acute Toxicity, Mutagenicity, Tumorigenicity, Reproductive Effects,                             |
| A00409 | Acute Toxicity, Multiple Dose Effects                                                           |
| A00410 | Mutagenicity, Reproductive Effects, Multiple Dose Effects                                       |
| A00411 | Non-toxicity                                                                                    |
| A00412 | Non-toxicity                                                                                    |
| A00413 | Mutagenicity, Multiple Dose Effects                                                             |
| A00414 | Acute Toxicity                                                                                  |
| A00415 | Acute Toxicity                                                                                  |
| A00416 | Acute Toxicity, Mutagenicity, Reproductive Effects, Multiple Dose Effects                       |
| A00417 | Acute Toxicity, Tumorigenicity, Reproductive Effects, Multiple Dose Effects                     |
| A00418 | Non-toxicity                                                                                    |
| A00419 | Acute Toxicity                                                                                  |
| A00420 | Acute Toxicity, Mutagenicity                                                                    |
| A00421 | Non-toxicity                                                                                    |
| A00422 | Acute Toxicity, Mutagenicity, Multiple Dose Effects                                             |
| A00423 | Acute Toxicity, Reproductive Effects, Multiple Dose Effects                                     |
| A00424 | Acute Toxicity, Mutagenicity, Skin and Eye Irritation, Multiple Dose Effects                    |
| A00425 | Acute Toxicity, Multiple Dose Effects                                                           |
| A00426 | Acute Toxicity, Mutagenicity, Multiple Dose Effects                                             |
| A00427 | Acute Toxicity, Multiple Dose Effects                                                           |
| A00428 | Acute Toxicity, Reproductive Effects, Multiple Dose Effects                                     |

|        |                                                                                                       |
|--------|-------------------------------------------------------------------------------------------------------|
| A00429 | Acute Toxicity, Mutagenicity, Tumorigenicity, Reproductive Effects,                                   |
| A00430 | Acute Toxicity                                                                                        |
| A00431 | Reproductive Effects, Multiple Dose Effects                                                           |
| A00432 | Acute Toxicity, Tumorigenicity, Multiple Dose Effects                                                 |
| A00433 | Acute Toxicity, Reproductive Effects, Multiple Dose Effects                                           |
| A00434 | Acute Toxicity, Multiple Dose Effects                                                                 |
| A00435 | Acute Toxicity, Skin and Eye Irritation                                                               |
| A00436 | Acute Toxicity, Mutagenicity                                                                          |
| A00437 | Acute Toxicity, Mutagenicity, Tumorigenicity, Skin and Eye Irritation                                 |
| A00438 | Acute Toxicity, Mutagenicity, Tumorigenicity                                                          |
| A00439 | Acute Toxicity                                                                                        |
| A00440 | Acute Toxicity, Mutagenicity, Multiple Dose Effects                                                   |
| A00441 | Non-toxicity                                                                                          |
| A00442 | Acute Toxicity                                                                                        |
| A00443 | Acute Toxicity, Mutagenicity, Reproductive Effects, Multiple Dose Effects                             |
| A00444 | Acute Toxicity, Mutagenicity, Tumorigenicity, Multiple Dose Effects                                   |
| A00445 | Acute Toxicity, Mutagenicity, Tumorigenicity, Multiple Dose Effects                                   |
| A00446 | Acute Toxicity, Mutagenicity, Tumorigenicity, Skin and Eye Irritation,                                |
| A00447 | Acute Toxicity, Mutagenicity, Tumorigenicity, Reproductive Effects,                                   |
| A00448 | Acute Toxicity, Mutagenicity, Skin and Eye Irritation, Reproductive Effects,<br>Multiple Dose Effects |
| A00449 | Acute Toxicity, Mutagenicity, Tumorigenicity, Skin and Eye Irritation,                                |
| A00450 | Non-toxicity                                                                                          |
| A00451 | Acute Toxicity, Skin and Eye Irritation                                                               |
| A00452 | Acute Toxicity                                                                                        |
| A00453 | Acute Toxicity, Mutagenicity, Tumorigenicity, Skin and Eye Irritation,                                |
| A00454 | Acute Toxicity, Tumorigenicity, Multiple Dose Effects                                                 |
| A00455 | Acute Toxicity, Mutagenicity, Tumorigenicity, Skin and Eye Irritation,<br>Multiple Dose Effects       |
| A00456 | Acute Toxicity                                                                                        |
| A00457 | Acute Toxicity, Mutagenicity, Tumorigenicity                                                          |
| A00458 | Acute Toxicity                                                                                        |
| A00459 | Acute Toxicity, Skin and Eye Irritation                                                               |
| A00460 | Acute Toxicity                                                                                        |
| A00461 | Acute Toxicity, Skin and Eye Irritation, Multiple Dose Effects                                        |
| A00462 | Acute Toxicity, Mutagenicity, Tumorigenicity, Multiple Dose Effects                                   |
| A00463 | Acute Toxicity, Mutagenicity, Multiple Dose Effects                                                   |
| A00464 | Acute Toxicity, Multiple Dose Effects                                                                 |
| A00465 | Acute Toxicity, Tumorigenicity, Skin and Eye Irritation                                               |
| A00466 | Acute Toxicity, Reproductive Effects                                                                  |
| A00467 | Reproductive Effects, Multiple Dose Effects                                                           |
| A00468 | Acute Toxicity, Mutagenicity, Tumorigenicity, Reproductive Effects,                                   |
| A00469 | Acute Toxicity, Mutagenicity                                                                          |
| A00470 | Mutagenicity                                                                                          |
| A00471 | Acute Toxicity, Reproductive Effects, Multiple Dose Effects                                           |
| A00472 | Acute Toxicity, Mutagenicity, Tumorigenicity, Skin and Eye Irritation,                                |

|        |                                                                                                    |
|--------|----------------------------------------------------------------------------------------------------|
| A00473 | Acute Toxicity, Skin and Eye Irritation                                                            |
| A00474 | Acute Toxicity                                                                                     |
| A00475 | Non-toxicity                                                                                       |
| A00476 | Acute Toxicity, Skin and Eye Irritation, Multiple Dose Effects                                     |
| A00477 | Acute Toxicity, Mutagenicity, Tumorigenicity, Skin and Eye Irritation, Multiple Dose Effects       |
| A00478 | Acute Toxicity, Mutagenicity, Tumorigenicity, Skin and Eye Irritation,                             |
| A00479 | Acute Toxicity                                                                                     |
| A00480 | Non-toxicity                                                                                       |
| A00481 | Acute Toxicity, Mutagenicity                                                                       |
| A00482 | Acute Toxicity                                                                                     |
| A00483 | Acute Toxicity, Mutagenicity, Skin and Eye Irritation, Reproductive Effects, Multiple Dose Effects |
| A00484 | Mutagenicity                                                                                       |
| A00485 | Acute Toxicity, Mutagenicity, Tumorigenicity, Reproductive Effects,                                |
| A00486 | Acute Toxicity, Mutagenicity, Tumorigenicity                                                       |
| A00487 | Acute Toxicity, Multiple Dose Effects                                                              |
| A00488 | Acute Toxicity, Skin and Eye Irritation                                                            |
| A00489 | Acute Toxicity                                                                                     |
| A00490 | Acute Toxicity, Mutagenicity                                                                       |
| A00491 | Acute Toxicity, Tumorigenicity, Multiple Dose Effects                                              |
| A00492 | Acute Toxicity, Tumorigenicity, Reproductive Effects, Multiple Dose Effects                        |
| A00493 | Acute Toxicity, Skin and Eye Irritation, Reproductive Effects, Multiple Dose                       |
| A00494 | Non-toxicity                                                                                       |
| A00495 | Acute Toxicity, Tumorigenicity, Multiple Dose Effects                                              |
| A00496 | Acute Toxicity                                                                                     |
| A00497 | Acute Toxicity, Reproductive Effects, Multiple Dose Effects                                        |
| A00498 | Acute Toxicity, Mutagenicity, Tumorigenicity, Skin and Eye Irritation                              |
| A00499 | Acute Toxicity                                                                                     |
| A00500 | Non-toxicity                                                                                       |
| A00501 | Acute Toxicity, Multiple Dose Effects                                                              |
| A00502 | Acute Toxicity, Mutagenicity, Skin and Eye Irritation, Reproductive Effects, Multiple Dose Effects |
| A00503 | Skin and Eye Irritation                                                                            |
| A00504 | Skin and Eye Irritation                                                                            |
| A00505 | Acute Toxicity, Reproductive Effects                                                               |
| A00506 | Acute Toxicity, Skin and Eye Irritation                                                            |
| A00507 | Acute Toxicity, Reproductive Effects                                                               |
| A00508 | Acute Toxicity, Tumorigenicity, Reproductive Effects, Multiple Dose Effects                        |
| A00509 | Acute Toxicity, Skin and Eye Irritation, Reproductive Effects, Multiple Dose                       |
| A00510 | Acute Toxicity, Tumorigenicity, Reproductive Effects, Multiple Dose Effects                        |
| A00511 | Acute Toxicity, Mutagenicity, Multiple Dose Effects                                                |
| A00512 | Acute Toxicity                                                                                     |
| A00513 | Acute Toxicity, Mutagenicity, Reproductive Effects, Multiple Dose Effects                          |
| A00514 | Acute Toxicity, Reproductive Effects, Multiple Dose Effects                                        |

|        |                                                                                                    |
|--------|----------------------------------------------------------------------------------------------------|
| A00515 | Acute Toxicity, Mutagenicity, Skin and Eye Irritation, Reproductive Effects, Multiple Dose Effects |
| A00516 | Acute Toxicity, Mutagenicity                                                                       |
| A00517 | Acute Toxicity, Multiple Dose Effects                                                              |
| A00518 | Acute Toxicity                                                                                     |
| A00519 | Acute Toxicity, Skin and Eye Irritation, Reproductive Effects                                      |
| A00520 | Acute Toxicity                                                                                     |
| A00521 | Acute Toxicity, Multiple Dose Effects                                                              |
| A00522 | Acute Toxicity, Mutagenicity, Tumorigenicity, Reproductive Effects,                                |
| A00523 | Acute Toxicity                                                                                     |
| A00524 | Acute Toxicity, Skin and Eye Irritation                                                            |
| A00525 | Acute Toxicity                                                                                     |
| A00526 | Acute Toxicity, Mutagenicity, Skin and Eye Irritation                                              |
| A00527 | Skin and Eye Irritation                                                                            |
| A00528 | Acute Toxicity, Reproductive Effects                                                               |
| A00529 | Acute Toxicity                                                                                     |
| A00530 | Acute Toxicity, Reproductive Effects, Multiple Dose Effects                                        |
| A00531 | Acute Toxicity, Mutagenicity, Tumorigenicity, Skin and Eye Irritation,                             |
| A00532 | Acute Toxicity, Tumorigenicity, Reproductive Effects, Multiple Dose Effects                        |
| A00533 | Non-toxicity                                                                                       |
| A00534 | Acute Toxicity                                                                                     |
| A00535 | Non-toxicity                                                                                       |
| A00536 | Acute Toxicity, Mutagenicity, Reproductive Effects, Multiple Dose Effects                          |
| A00537 | Acute Toxicity, Mutagenicity, Skin and Eye Irritation, Reproductive Effects, Multiple Dose Effects |
| A00538 | Acute Toxicity, Mutagenicity, Skin and Eye Irritation, Reproductive Effects                        |
| A00539 | Acute Toxicity                                                                                     |
| A00540 | Acute Toxicity                                                                                     |
| A00541 | Acute Toxicity, Mutagenicity, Tumorigenicity, Skin and Eye Irritation,                             |
| A00542 | Acute Toxicity, Mutagenicity, Multiple Dose Effects                                                |
| A00543 | Acute Toxicity                                                                                     |
| A00544 | Acute Toxicity, Mutagenicity, Reproductive Effects, Multiple Dose Effects                          |
| A00545 | Acute Toxicity, Mutagenicity, Reproductive Effects, Multiple Dose Effects                          |
| A00546 | Acute Toxicity, Mutagenicity, Tumorigenicity, Reproductive Effects,                                |
| A00547 | Acute Toxicity                                                                                     |
| A00548 | Acute Toxicity, Mutagenicity, Tumorigenicity, Skin and Eye Irritation,                             |
| A00549 | Acute Toxicity                                                                                     |
| A00550 | Acute Toxicity, Skin and Eye Irritation                                                            |
| A00551 | Acute Toxicity, Reproductive Effects, Multiple Dose Effects                                        |
| A00552 | Acute Toxicity                                                                                     |
| A00553 | Acute Toxicity, Tumorigenicity, Multiple Dose Effects                                              |
| A00554 | Mutagenicity, Tumorigenicity, Skin and Eye Irritation, Multiple Dose Effects                       |
| A00555 | Acute Toxicity, Multiple Dose Effects                                                              |
| A00556 | Acute Toxicity                                                                                     |
| A00557 | Acute Toxicity, Skin and Eye Irritation, Multiple Dose Effects                                     |
| A00558 | Acute Toxicity, Skin and Eye Irritation                                                            |

|        |                                                                                                       |
|--------|-------------------------------------------------------------------------------------------------------|
| A00559 | Acute Toxicity                                                                                        |
| A00560 | Acute Toxicity                                                                                        |
| A00561 | Acute Toxicity, Mutagenicity, Tumorigenicity, Reproductive Effects,                                   |
| A00562 | Acute Toxicity, Mutagenicity, Tumorigenicity, Skin and Eye Irritation,                                |
| A00563 | Mutagenicity, Reproductive Effects                                                                    |
| A00564 | Acute Toxicity, Multiple Dose Effects                                                                 |
| A00565 | Acute Toxicity, Mutagenicity, Skin and Eye Irritation, Reproductive Effects,<br>Multiple Dose Effects |
| A00566 | Non-toxicity                                                                                          |
| A00567 | Acute Toxicity, Mutagenicity                                                                          |
| A00568 | Acute Toxicity, Mutagenicity, Skin and Eye Irritation, Reproductive Effects,<br>Multiple Dose Effects |
| A00569 | Acute Toxicity, Reproductive Effects, Multiple Dose Effects                                           |
| A00570 | Acute Toxicity, Mutagenicity, Skin and Eye Irritation, Multiple Dose Effects                          |
| A00571 | Acute Toxicity, Mutagenicity, Tumorigenicity, Skin and Eye Irritation,                                |
| A00572 | Acute Toxicity, Mutagenicity, Tumorigenicity, Skin and Eye Irritation,                                |
| A00573 | Acute Toxicity, Mutagenicity, Tumorigenicity, Reproductive Effects,                                   |
| A00574 | Acute Toxicity, Mutagenicity, Tumorigenicity, Skin and Eye Irritation,                                |
| A00575 | Acute Toxicity, Reproductive Effects, Multiple Dose Effects                                           |
| A00576 | Acute Toxicity, Multiple Dose Effects                                                                 |
| A00577 | Acute Toxicity                                                                                        |
| A00578 | Acute Toxicity                                                                                        |
| A00579 | Acute Toxicity, Mutagenicity                                                                          |
| A00580 | Multiple Dose Effects                                                                                 |
| A00581 | Mutagenicity                                                                                          |
| A00582 | Reproductive Effects, Multiple Dose Effects                                                           |
| A00583 | Acute Toxicity, Reproductive Effects, Multiple Dose Effects                                           |
| A00584 | Multiple Dose Effects                                                                                 |
| A00585 | Non-toxicity                                                                                          |
| A00586 | Acute Toxicity, Mutagenicity, Reproductive Effects, Multiple Dose Effects                             |
| A00587 | Acute Toxicity, Mutagenicity, Tumorigenicity, Reproductive Effects,                                   |
| A00588 | Acute Toxicity, Mutagenicity, Skin and Eye Irritation, Reproductive Effects,<br>Multiple Dose Effects |
| A00589 | Acute Toxicity                                                                                        |
| A00590 | Acute Toxicity, Multiple Dose Effects                                                                 |
| A00591 | Mutagenicity, Tumorigenicity, Multiple Dose Effects                                                   |
| A00592 | Multiple Dose Effects                                                                                 |
| A00593 | Acute Toxicity                                                                                        |
| A00594 | Skin and Eye Irritation                                                                               |
| A00595 | Acute Toxicity, Reproductive Effects, Multiple Dose Effects                                           |
| A00596 | Acute Toxicity                                                                                        |
| A00597 | Acute Toxicity, Mutagenicity, Skin and Eye Irritation, Reproductive Effects,<br>Multiple Dose Effects |
| A00598 | Acute Toxicity, Mutagenicity, Skin and Eye Irritation, Reproductive Effects,<br>Multiple Dose Effects |
| A00599 | Acute Toxicity                                                                                        |

|        |                                                                                                         |
|--------|---------------------------------------------------------------------------------------------------------|
| A00600 | Acute Toxicity, Mutagenicity, Tumorigenicity, Reproductive Effects,                                     |
| A00601 | Acute Toxicity, Mutagenicity, Tumorigenicity, Multiple Dose Effects                                     |
| A00602 | Acute Toxicity                                                                                          |
| A00603 | Acute Toxicity, Reproductive Effects, Multiple Dose Effects                                             |
| A00604 | Acute Toxicity, Mutagenicity, Reproductive Effects, Multiple Dose Effects                               |
| A00605 | Acute Toxicity, Mutagenicity, Skin and Eye Irritation, Reproductive Effects,<br>Multiple Dose Effects   |
| A00606 | Acute Toxicity                                                                                          |
| A00607 | Multiple Dose Effects                                                                                   |
| A00608 | Acute Toxicity, Reproductive Effects, Multiple Dose Effects                                             |
| A00609 | Acute Toxicity, Tumorigenicity, Skin and Eye Irritation, Reproductive<br>Effects, Multiple Dose Effects |
| A00610 | Acute Toxicity, Reproductive Effects                                                                    |
| A00611 | Acute Toxicity, Mutagenicity, Skin and Eye Irritation                                                   |
| A00612 | Acute Toxicity                                                                                          |
| A00613 | Non-toxicity                                                                                            |
| A00614 | Acute Toxicity, Mutagenicity, Tumorigenicity, Reproductive Effects,                                     |
| A00615 | Acute Toxicity, Multiple Dose Effects                                                                   |
| A00616 | Acute Toxicity, Mutagenicity, Tumorigenicity, Reproductive Effects,                                     |
| A00617 | Skin and Eye Irritation                                                                                 |
| A00618 | Non-toxicity                                                                                            |
| A00619 | Acute Toxicity, Multiple Dose Effects                                                                   |
| A00620 | Acute Toxicity, Reproductive Effects, Multiple Dose Effects                                             |
| A00621 | Acute Toxicity, Mutagenicity, Multiple Dose Effects                                                     |
| A00622 | Acute Toxicity, Skin and Eye Irritation, Multiple Dose Effects                                          |
| A00623 | Skin and Eye Irritation                                                                                 |
| A00624 | Acute Toxicity                                                                                          |
| A00625 | Acute Toxicity, Mutagenicity, Tumorigenicity, Reproductive Effects,                                     |
| A00626 | Non-toxicity                                                                                            |
| A00627 | Non-toxicity                                                                                            |
| A00628 | Acute Toxicity, Mutagenicity, Tumorigenicity, Skin and Eye Irritation,                                  |
| A00629 | Acute Toxicity, Mutagenicity, Reproductive Effects                                                      |
| A00630 | Acute Toxicity, Mutagenicity                                                                            |
| A00631 | Reproductive Effects, Multiple Dose Effects                                                             |
| A00632 | Acute Toxicity, Mutagenicity                                                                            |
| A00633 | Acute Toxicity, Tumorigenicity, Reproductive Effects, Multiple Dose Effects                             |
| A00634 | Non-toxicity                                                                                            |
| A00635 | Mutagenicity                                                                                            |
| A00636 | Acute Toxicity, Mutagenicity, Tumorigenicity, Skin and Eye Irritation,<br>Multiple Dose Effects         |
| A00637 | Mutagenicity                                                                                            |
| A00638 | Acute Toxicity, Mutagenicity, Tumorigenicity, Reproductive Effects,                                     |
| A00639 | Acute Toxicity                                                                                          |
| A00640 | Acute Toxicity                                                                                          |
| A00641 | Acute Toxicity, Mutagenicity, Skin and Eye Irritation, Multiple Dose Effects                            |
| A00642 | Acute Toxicity, Mutagenicity, Multiple Dose Effects                                                     |

|        |                                                                                                       |
|--------|-------------------------------------------------------------------------------------------------------|
| A00643 | Acute Toxicity, Mutagenicity, Multiple Dose Effects                                                   |
| A00644 | Acute Toxicity                                                                                        |
| A00645 | Acute Toxicity                                                                                        |
| A00646 | Acute Toxicity                                                                                        |
| A00647 | Skin and Eye Irritation                                                                               |
| A00648 | Acute Toxicity, Mutagenicity, Tumorigenicity, Reproductive Effects,                                   |
| A00649 | Acute Toxicity, Mutagenicity, Reproductive Effects                                                    |
| A00650 | Acute Toxicity                                                                                        |
| A00651 | Acute Toxicity, Mutagenicity, Reproductive Effects, Multiple Dose Effects                             |
| A00652 | Acute Toxicity, Mutagenicity, Tumorigenicity, Reproductive Effects,                                   |
| A00653 | Acute Toxicity, Mutagenicity, Tumorigenicity, Skin and Eye Irritation,                                |
| A00654 | Acute Toxicity, Mutagenicity, Tumorigenicity, Skin and Eye Irritation,                                |
| A00655 | Non-toxicity                                                                                          |
| A00656 | Acute Toxicity, Mutagenicity, Multiple Dose Effects                                                   |
| A00657 | Acute Toxicity, Mutagenicity, Multiple Dose Effects                                                   |
| A00658 | Acute Toxicity, Skin and Eye Irritation                                                               |
| A00659 | Acute Toxicity, Mutagenicity, Skin and Eye Irritation, Reproductive Effects,<br>Multiple Dose Effects |
| A00660 | Acute Toxicity, Mutagenicity, Reproductive Effects, Multiple Dose Effects                             |
| A00661 | Acute Toxicity, Mutagenicity, Tumorigenicity, Multiple Dose Effects                                   |
| A00662 | Acute Toxicity, Mutagenicity, Tumorigenicity, Reproductive Effects,                                   |
| A00663 | Acute Toxicity, Mutagenicity, Tumorigenicity, Skin and Eye Irritation,                                |
| A00664 | Acute Toxicity, Mutagenicity, Skin and Eye Irritation                                                 |
| A00665 | Acute Toxicity, Reproductive Effects                                                                  |
| A00666 | Acute Toxicity, Mutagenicity, Tumorigenicity, Reproductive Effects,                                   |
| A00667 | Acute Toxicity, Multiple Dose Effects                                                                 |
| A00668 | Acute Toxicity, Mutagenicity, Multiple Dose Effects                                                   |
| A00669 | Acute Toxicity, Mutagenicity                                                                          |
| A00670 | Acute Toxicity, Mutagenicity, Reproductive Effects                                                    |
| A00671 | Acute Toxicity                                                                                        |
| A00672 | Non-toxicity                                                                                          |
| A00673 | Acute Toxicity                                                                                        |
| A00674 | Acute Toxicity, Mutagenicity, Reproductive Effects, Multiple Dose Effects                             |
| A00675 | Mutagenicity, Tumorigenicity, Multiple Dose Effects                                                   |
| A00676 | Acute Toxicity, Multiple Dose Effects                                                                 |
| A00677 | Acute Toxicity                                                                                        |
| A00678 | Acute Toxicity                                                                                        |
| A00679 | Acute Toxicity, Mutagenicity, Tumorigenicity, Reproductive Effects,                                   |
| A00680 | Acute Toxicity, Tumorigenicity, Reproductive Effects                                                  |
| A00681 | Acute Toxicity, Mutagenicity, Tumorigenicity, Skin and Eye Irritation,                                |
| A00682 | Acute Toxicity, Multiple Dose Effects                                                                 |
| A00683 | Acute Toxicity, Reproductive Effects                                                                  |
| A00684 | Mutagenicity, Tumorigenicity                                                                          |
| A00685 | Acute Toxicity                                                                                        |
| A00686 | Acute Toxicity, Mutagenicity                                                                          |
| A00687 | Acute Toxicity, Mutagenicity, Tumorigenicity, Skin and Eye Irritation,                                |



|        |                                                                                                       |
|--------|-------------------------------------------------------------------------------------------------------|
| A00688 | Acute Toxicity, Mutagenicity, Tumorigenicity, Skin and Eye Irritation,                                |
| A00689 | Acute Toxicity, Skin and Eye Irritation                                                               |
| A00690 | Acute Toxicity, Skin and Eye Irritation                                                               |
| A00691 | Acute Toxicity, Mutagenicity, Multiple Dose Effects                                                   |
| A00692 | Skin and Eye Irritation, Reproductive Effects                                                         |
| A00693 | Acute Toxicity, Reproductive Effects, Multiple Dose Effects                                           |
| A00694 | Acute Toxicity, Mutagenicity, Tumorigenicity, Skin and Eye Irritation,                                |
| A00695 | Acute Toxicity, Mutagenicity, Multiple Dose Effects                                                   |
| A00696 | Acute Toxicity, Mutagenicity, Tumorigenicity, Reproductive Effects,                                   |
| A00697 | Acute Toxicity, Mutagenicity, Skin and Eye Irritation, Reproductive Effects,<br>Multiple Dose Effects |
| A00698 | Acute Toxicity                                                                                        |
| A00699 | Acute Toxicity                                                                                        |
| A00700 | Acute Toxicity, Multiple Dose Effects                                                                 |
| A00701 | Acute Toxicity, Multiple Dose Effects                                                                 |
| A00702 | Acute Toxicity                                                                                        |
| A00703 | Acute Toxicity, Multiple Dose Effects                                                                 |
| A00704 | Mutagenicity, Tumorigenicity                                                                          |
| A00705 | Acute Toxicity, Mutagenicity, Reproductive Effects, Multiple Dose Effects                             |
| A00706 | Acute Toxicity, Mutagenicity, Multiple Dose Effects                                                   |
| A00707 | Acute Toxicity, Reproductive Effects                                                                  |
| A00708 | Acute Toxicity                                                                                        |
| A00709 | Acute Toxicity                                                                                        |
| A00710 | Acute Toxicity                                                                                        |
| A00711 | Acute Toxicity, Mutagenicity, Reproductive Effects, Multiple Dose Effects                             |
| A00712 | Acute Toxicity, Mutagenicity                                                                          |
| A00713 | Acute Toxicity, Multiple Dose Effects                                                                 |
| A00714 | Reproductive Effects, Multiple Dose Effects                                                           |
| A00715 | Acute Toxicity                                                                                        |
| A00716 | Acute Toxicity, Mutagenicity                                                                          |
| A00717 | Acute Toxicity, Reproductive Effects, Multiple Dose Effects                                           |
| A00718 | Acute Toxicity, Mutagenicity, Skin and Eye Irritation                                                 |
| A00719 | Acute Toxicity, Mutagenicity, Tumorigenicity                                                          |
| A00720 | Acute Toxicity, Reproductive Effects, Multiple Dose Effects                                           |
| A00721 | Non-toxicity                                                                                          |
| A00722 | Acute Toxicity, Mutagenicity, Tumorigenicity, Reproductive Effects,                                   |
| A00723 | Acute Toxicity, Mutagenicity, Reproductive Effects, Multiple Dose Effects                             |
| A00724 | Acute Toxicity, Mutagenicity, Tumorigenicity, Skin and Eye Irritation,                                |
| A00725 | Acute Toxicity, Mutagenicity, Reproductive Effects, Multiple Dose Effects                             |
| A00726 | Multiple Dose Effects                                                                                 |
| A00727 | Non-toxicity                                                                                          |
| A00728 | Acute Toxicity, Multiple Dose Effects                                                                 |
| A00729 | Acute Toxicity                                                                                        |
| A00730 | Acute Toxicity, Skin and Eye Irritation, Multiple Dose Effects                                        |
| A00731 | Acute Toxicity, Mutagenicity, Tumorigenicity, Reproductive Effects,                                   |
| A00732 | Acute Toxicity, Mutagenicity                                                                          |

|        |                                                                                                 |
|--------|-------------------------------------------------------------------------------------------------|
| A00733 | Acute Toxicity, Mutagenicity, Multiple Dose Effects                                             |
| A00734 | Acute Toxicity                                                                                  |
| A00735 | Acute Toxicity, Mutagenicity, Tumorigenicity                                                    |
| A00736 | Acute Toxicity, Mutagenicity, Skin and Eye Irritation, Multiple Dose Effects                    |
| A00737 | Acute Toxicity, Reproductive Effects                                                            |
| A00738 | Acute Toxicity, Mutagenicity, Multiple Dose Effects                                             |
| A00739 | Acute Toxicity, Multiple Dose Effects                                                           |
| A00740 | Acute Toxicity                                                                                  |
| A00741 | Acute Toxicity, Mutagenicity, Reproductive Effects, Multiple Dose Effects                       |
| A00742 | Acute Toxicity, Reproductive Effects                                                            |
| A00743 | Acute Toxicity, Mutagenicity, Tumorigenicity, Skin and Eye Irritation,                          |
| A00744 | Reproductive Effects                                                                            |
| A00745 | Acute Toxicity, Reproductive Effects, Multiple Dose Effects                                     |
| A00746 | Acute Toxicity                                                                                  |
| A00747 | Acute Toxicity, Mutagenicity, Tumorigenicity, Skin and Eye Irritation,                          |
| A00748 | Acute Toxicity, Reproductive Effects, Multiple Dose Effects                                     |
| A00749 | Acute Toxicity, Reproductive Effects                                                            |
| A00750 | Acute Toxicity, Reproductive Effects, Multiple Dose Effects                                     |
| A00751 | Acute Toxicity, Mutagenicity, Tumorigenicity, Reproductive Effects,                             |
| A00752 | Acute Toxicity, Mutagenicity, Tumorigenicity, Skin and Eye Irritation,<br>Multiple Dose Effects |
| A00753 | Acute Toxicity                                                                                  |
| A00754 | Multiple Dose Effects                                                                           |
| A00755 | Non-toxicity                                                                                    |
| A00756 | Acute Toxicity                                                                                  |
| A00757 | Acute Toxicity                                                                                  |
| A00758 | Acute Toxicity, Multiple Dose Effects                                                           |
| A00759 | Acute Toxicity, Reproductive Effects, Multiple Dose Effects                                     |
| A00760 | Acute Toxicity, Reproductive Effects, Multiple Dose Effects                                     |
| A00761 | Acute Toxicity, Reproductive Effects, Multiple Dose Effects                                     |
| A00762 | Acute Toxicity, Multiple Dose Effects                                                           |
| A00763 | Acute Toxicity, Reproductive Effects                                                            |
| A00764 | Acute Toxicity, Reproductive Effects, Multiple Dose Effects                                     |
| A00765 | Acute Toxicity, Mutagenicity, Tumorigenicity, Reproductive Effects,                             |
| A00766 | Acute Toxicity, Skin and Eye Irritation, Multiple Dose Effects                                  |
| A00767 | Acute Toxicity, Reproductive Effects                                                            |
| A00768 | Acute Toxicity                                                                                  |
| A00769 | Acute Toxicity, Multiple Dose Effects                                                           |
| A00770 | Acute Toxicity, Mutagenicity, Tumorigenicity, Skin and Eye Irritation,                          |
| A00771 | Acute Toxicity, Mutagenicity, Tumorigenicity, Reproductive Effects,                             |
| A00772 | Acute Toxicity                                                                                  |
| A00773 | Acute Toxicity, Reproductive Effects, Multiple Dose Effects                                     |
| A00774 | Acute Toxicity                                                                                  |
| A00775 | Acute Toxicity, Mutagenicity, Tumorigenicity, Reproductive Effects,                             |
| A00776 | Acute Toxicity, Reproductive Effects, Multiple Dose Effects                                     |
| A00777 | Acute Toxicity, Multiple Dose Effects                                                           |

|        |                                                                                                    |
|--------|----------------------------------------------------------------------------------------------------|
| A00778 | Acute Toxicity, Mutagenicity, Tumorigenicity, Skin and Eye Irritation,                             |
| A00779 | Non-toxicity                                                                                       |
| A00780 | Acute Toxicity, Multiple Dose Effects                                                              |
| A00781 | Acute Toxicity, Mutagenicity, Skin and Eye Irritation, Reproductive Effects, Multiple Dose Effects |
| A00782 | Acute Toxicity, Reproductive Effects, Multiple Dose Effects                                        |
| A00783 | Acute Toxicity, Reproductive Effects, Multiple Dose Effects                                        |
| A00784 | Mutagenicity, Tumorigenicity, Multiple Dose Effects                                                |
| A00785 | Acute Toxicity, Mutagenicity, Reproductive Effects, Multiple Dose Effects                          |
| A00786 | Acute Toxicity, Mutagenicity, Tumorigenicity, Skin and Eye Irritation,                             |
| A00787 | Acute Toxicity, Reproductive Effects, Multiple Dose Effects                                        |
| A00788 | Acute Toxicity, Mutagenicity, Reproductive Effects, Multiple Dose Effects                          |
| A00789 | Acute Toxicity, Mutagenicity, Multiple Dose Effects                                                |
| A00790 | Acute Toxicity, Reproductive Effects, Multiple Dose Effects                                        |
| A00791 | Acute Toxicity, Mutagenicity, Tumorigenicity, Skin and Eye Irritation,                             |
| A00792 | Acute Toxicity, Reproductive Effects, Multiple Dose Effects                                        |
| A00793 | Acute Toxicity, Multiple Dose Effects                                                              |
| A00794 | Acute Toxicity, Mutagenicity, Tumorigenicity, Reproductive Effects,                                |
| A00795 | Acute Toxicity, Reproductive Effects, Multiple Dose Effects                                        |
| A00796 | Acute Toxicity, Reproductive Effects, Multiple Dose Effects                                        |
| A00797 | Acute Toxicity                                                                                     |
| A00798 | Non-toxicity                                                                                       |
| A00799 | Acute Toxicity, Multiple Dose Effects                                                              |
| A00800 | Non-toxicity                                                                                       |
| A00801 | Acute Toxicity, Multiple Dose Effects                                                              |
| A00802 | Mutagenicity                                                                                       |
| A00803 | Non-toxicity                                                                                       |
| A00804 | Acute Toxicity                                                                                     |
| A00805 | Acute Toxicity, Mutagenicity, Tumorigenicity, Skin and Eye Irritation,                             |
| A00806 | Acute Toxicity, Mutagenicity, Reproductive Effects                                                 |
| A00807 | Acute Toxicity, Multiple Dose Effects                                                              |
| A00808 | Acute Toxicity                                                                                     |
| A00809 | Acute Toxicity, Mutagenicity, Tumorigenicity, Reproductive Effects,                                |
| A00810 | Acute Toxicity                                                                                     |
| A00811 | Acute Toxicity                                                                                     |
| A00812 | Non-toxicity                                                                                       |
| A00813 | Acute Toxicity, Tumorigenicity, Reproductive Effects, Multiple Dose Effects                        |
| A00814 | Non-toxicity                                                                                       |
| A00815 | Acute Toxicity, Mutagenicity, Reproductive Effects                                                 |
| A00816 | Acute Toxicity, Multiple Dose Effects                                                              |
| A00817 | Acute Toxicity, Reproductive Effects, Multiple Dose Effects                                        |
| A00818 | Non-toxicity                                                                                       |
| A00819 | Acute Toxicity, Mutagenicity, Multiple Dose Effects                                                |
| A00820 | Acute Toxicity, Mutagenicity, Tumorigenicity, Skin and Eye Irritation,                             |
| A00821 | Acute Toxicity, Mutagenicity, Reproductive Effects, Multiple Dose Effects                          |
| A00822 | Acute Toxicity, Mutagenicity, Reproductive Effects, Multiple Dose Effects                          |

|        |                                                                                                       |
|--------|-------------------------------------------------------------------------------------------------------|
| A00823 | Acute Toxicity, Reproductive Effects                                                                  |
| A00824 | Non-toxicity                                                                                          |
| A00825 | Acute Toxicity, Mutagenicity, Tumorigenicity, Reproductive Effects,                                   |
| A00826 | Acute Toxicity, Mutagenicity, Reproductive Effects, Multiple Dose Effects                             |
| A00827 | Non-toxicity                                                                                          |
| A00828 | Acute Toxicity                                                                                        |
| A00829 | Acute Toxicity, Multiple Dose Effects                                                                 |
| A00830 | Non-toxicity                                                                                          |
| A00831 | Non-toxicity                                                                                          |
| A00832 | Acute Toxicity                                                                                        |
| A00833 | Acute Toxicity                                                                                        |
| A00834 | Acute Toxicity                                                                                        |
| A00835 | Acute Toxicity                                                                                        |
| A00836 | Acute Toxicity                                                                                        |
| A00837 | Acute Toxicity, Multiple Dose Effects                                                                 |
| A00838 | Acute Toxicity, Mutagenicity, Multiple Dose Effects                                                   |
| A00839 | Acute Toxicity, Mutagenicity, Tumorigenicity, Reproductive Effects,                                   |
| A00840 | Acute Toxicity, Mutagenicity, Skin and Eye Irritation                                                 |
| A00841 | Acute Toxicity, Mutagenicity, Skin and Eye Irritation, Reproductive Effects,<br>Multiple Dose Effects |
| A00842 | Acute Toxicity, Reproductive Effects                                                                  |
| A00843 | Acute Toxicity                                                                                        |
| A00844 | Acute Toxicity                                                                                        |
| A00845 | Acute Toxicity                                                                                        |
| A00846 | Acute Toxicity, Mutagenicity, Tumorigenicity, Skin and Eye Irritation,                                |
| A00847 | Acute Toxicity, Multiple Dose Effects                                                                 |
| A00848 | Acute Toxicity                                                                                        |
| A00849 | Acute Toxicity, Mutagenicity, Multiple Dose Effects                                                   |
| A00850 | Acute Toxicity, Mutagenicity, Tumorigenicity, Skin and Eye Irritation,                                |
| A00851 | Mutagenicity                                                                                          |
| A00852 | Acute Toxicity, Tumorigenicity                                                                        |
| A00853 | Mutagenicity                                                                                          |
| A00854 | Acute Toxicity, Multiple Dose Effects                                                                 |
| A00855 | Acute Toxicity, Mutagenicity, Tumorigenicity, Reproductive Effects                                    |
| A00856 | Acute Toxicity, Mutagenicity, Tumorigenicity, Skin and Eye Irritation,                                |
| A00857 | Acute Toxicity                                                                                        |
| A00858 | Acute Toxicity, Mutagenicity, Tumorigenicity, Skin and Eye Irritation,                                |
| A00859 | Acute Toxicity                                                                                        |
| A00860 | Acute Toxicity, Multiple Dose Effects                                                                 |
| A00861 | Acute Toxicity                                                                                        |
| A00862 | Acute Toxicity, Multiple Dose Effects                                                                 |
| A00863 | Non-toxicity                                                                                          |
| A00864 | Acute Toxicity, Mutagenicity, Tumorigenicity, Skin and Eye Irritation,                                |
| A00865 | Acute Toxicity, Reproductive Effects                                                                  |
| A00866 | Acute Toxicity                                                                                        |
| A00867 | Acute Toxicity, Reproductive Effects, Multiple Dose Effects                                           |

|        |                                                                                                    |
|--------|----------------------------------------------------------------------------------------------------|
| A00868 | Acute Toxicity, Mutagenicity, Tumorigenicity, Skin and Eye Irritation,                             |
| A00869 | Acute Toxicity, Skin and Eye Irritation, Reproductive Effects, Multiple Dose                       |
| A00870 | Acute Toxicity, Mutagenicity, Reproductive Effects, Multiple Dose Effects                          |
| A00871 | Acute Toxicity, Mutagenicity, Skin and Eye Irritation, Reproductive Effects, Multiple Dose Effects |
| A00872 | Acute Toxicity                                                                                     |
| A00873 | Acute Toxicity                                                                                     |
| A00874 | Acute Toxicity                                                                                     |
| A00875 | Acute Toxicity, Skin and Eye Irritation, Multiple Dose Effects                                     |
| A00876 | Acute Toxicity                                                                                     |
| A00877 | Acute Toxicity, Mutagenicity, Tumorigenicity, Reproductive Effects,                                |
| A00878 | Acute Toxicity, Mutagenicity, Reproductive Effects, Multiple Dose Effects                          |
| A00879 | Acute Toxicity, Mutagenicity, Reproductive Effects, Multiple Dose Effects                          |
| A00880 | Acute Toxicity, Reproductive Effects, Multiple Dose Effects                                        |
| A00881 | Acute Toxicity, Reproductive Effects, Multiple Dose Effects                                        |
| A00882 | Acute Toxicity, Mutagenicity, Tumorigenicity, Reproductive Effects,                                |
| A00883 | Acute Toxicity, Mutagenicity, Tumorigenicity, Skin and Eye Irritation,                             |
| A00884 | Acute Toxicity, Multiple Dose Effects                                                              |
| A00885 | Acute Toxicity                                                                                     |
| A00886 | Acute Toxicity, Mutagenicity, Multiple Dose Effects                                                |
| A00887 | Acute Toxicity, Mutagenicity, Tumorigenicity, Multiple Dose Effects                                |
| A00888 | Acute Toxicity, Mutagenicity                                                                       |
| A00889 | Acute Toxicity, Multiple Dose Effects                                                              |
| A00890 | Acute Toxicity, Multiple Dose Effects                                                              |
| A00891 | Acute Toxicity, Mutagenicity, Reproductive Effects, Multiple Dose Effects                          |
| A00892 | Acute Toxicity, Multiple Dose Effects                                                              |
| A00893 | Acute Toxicity                                                                                     |
| A00894 | Acute Toxicity                                                                                     |
| A00895 | Acute Toxicity                                                                                     |
| A00896 | Acute Toxicity                                                                                     |
| A00897 | Acute Toxicity, Reproductive Effects, Multiple Dose Effects                                        |
| A00898 | Acute Toxicity, Reproductive Effects, Multiple Dose Effects                                        |
| A00899 | Acute Toxicity, Mutagenicity, Multiple Dose Effects                                                |
| A00900 | Acute Toxicity, Mutagenicity                                                                       |
| A00901 | Acute Toxicity, Mutagenicity                                                                       |
| A00902 | Acute Toxicity, Mutagenicity, Tumorigenicity, Reproductive Effects,                                |
| A00903 | Non-toxicity                                                                                       |
| A00904 | Acute Toxicity                                                                                     |
| A00905 | Acute Toxicity, Mutagenicity, Tumorigenicity                                                       |
| A00906 | Acute Toxicity, Mutagenicity, Reproductive Effects, Multiple Dose Effects                          |
| A00907 | Acute Toxicity, Skin and Eye Irritation                                                            |
| A00908 | Multiple Dose Effects                                                                              |
| A00909 | Acute Toxicity, Mutagenicity, Tumorigenicity, Reproductive Effects,                                |
| A00910 | Acute Toxicity                                                                                     |
| A00911 | Acute Toxicity, Mutagenicity, Tumorigenicity, Skin and Eye Irritation,                             |
| A00912 | Acute Toxicity                                                                                     |

|        |                                                                                                       |
|--------|-------------------------------------------------------------------------------------------------------|
| A00913 | Acute Toxicity                                                                                        |
| A00914 | Acute Toxicity, Mutagenicity, Tumorigenicity, Skin and Eye Irritation,                                |
| A00915 | Acute Toxicity, Mutagenicity                                                                          |
| A00916 | Acute Toxicity, Mutagenicity, Tumorigenicity, Skin and Eye Irritation,                                |
| A00917 | Acute Toxicity, Skin and Eye Irritation                                                               |
| A00918 | Acute Toxicity, Skin and Eye Irritation, Reproductive Effects                                         |
| A00919 | Acute Toxicity, Multiple Dose Effects                                                                 |
| A00920 | Acute Toxicity, Skin and Eye Irritation, Reproductive Effects, Multiple Dose                          |
| A00921 | Acute Toxicity, Mutagenicity, Tumorigenicity, Skin and Eye Irritation                                 |
| A00922 | Acute Toxicity, Reproductive Effects, Multiple Dose Effects                                           |
| A00923 | Acute Toxicity                                                                                        |
| A00924 | Non-toxicity                                                                                          |
| A00925 | Acute Toxicity, Multiple Dose Effects                                                                 |
| A00926 | Acute Toxicity, Mutagenicity, Tumorigenicity, Skin and Eye Irritation,                                |
| A00927 | Acute Toxicity, Reproductive Effects, Multiple Dose Effects                                           |
| A00928 | Acute Toxicity, Multiple Dose Effects                                                                 |
| A00929 | Acute Toxicity, Mutagenicity, Reproductive Effects                                                    |
| A00930 | Non-toxicity                                                                                          |
| A00931 | Acute Toxicity, Mutagenicity, Tumorigenicity, Multiple Dose Effects                                   |
| A00932 | Non-toxicity                                                                                          |
| A00933 | Acute Toxicity                                                                                        |
| A00934 | Acute Toxicity, Multiple Dose Effects                                                                 |
| A00935 | Acute Toxicity, Reproductive Effects, Multiple Dose Effects                                           |
| A00936 | Acute Toxicity, Mutagenicity, Skin and Eye Irritation, Reproductive Effects,<br>Multiple Dose Effects |
| A00937 | Mutagenicity, Multiple Dose Effects                                                                   |
| A00938 | Acute Toxicity                                                                                        |
| A00939 | Acute Toxicity, Mutagenicity, Tumorigenicity, Skin and Eye Irritation,<br>Multiple Dose Effects       |
| A00940 | Acute Toxicity                                                                                        |
| A00941 | Acute Toxicity, Reproductive Effects, Multiple Dose Effects                                           |
| A00942 | Tumorigenicity, Reproductive Effects, Multiple Dose Effects                                           |
| A00943 | Acute Toxicity                                                                                        |
| A00944 | Acute Toxicity                                                                                        |
| A00945 | Acute Toxicity                                                                                        |
| A00946 | Acute Toxicity, Multiple Dose Effects                                                                 |
| A00947 | Acute Toxicity                                                                                        |
| A00948 | Acute Toxicity, Reproductive Effects, Multiple Dose Effects                                           |
| A00949 | Acute Toxicity                                                                                        |
| A00950 | Acute Toxicity, Mutagenicity, Skin and Eye Irritation, Reproductive Effects,<br>Multiple Dose Effects |
| A00951 | Acute Toxicity, Mutagenicity, Tumorigenicity, Reproductive Effects,                                   |
| A00952 | Acute Toxicity, Reproductive Effects, Multiple Dose Effects                                           |
| A00953 | Acute Toxicity, Reproductive Effects, Multiple Dose Effects                                           |
| A00954 | Non-toxicity                                                                                          |
| A00955 | Acute Toxicity, Mutagenicity, Reproductive Effects, Multiple Dose Effects                             |

|        |                                                                                                       |
|--------|-------------------------------------------------------------------------------------------------------|
| A00956 | Multiple Dose Effects                                                                                 |
| A00957 | Acute Toxicity, Multiple Dose Effects                                                                 |
| A00958 | Acute Toxicity                                                                                        |
| A00959 | Acute Toxicity                                                                                        |
| A00960 | Mutagenicity                                                                                          |
| A00961 | Skin and Eye Irritation                                                                               |
| A00962 | Acute Toxicity, Mutagenicity, Tumorigenicity, Skin and Eye Irritation,                                |
| A00963 | Acute Toxicity, Reproductive Effects, Multiple Dose Effects                                           |
| A00964 | Multiple Dose Effects                                                                                 |
| A00965 | Non-toxicity                                                                                          |
| A00966 | Acute Toxicity, Mutagenicity, Reproductive Effects, Multiple Dose Effects                             |
| A00967 | Acute Toxicity, Mutagenicity, Tumorigenicity, Skin and Eye Irritation,                                |
| A00968 | Non-toxicity                                                                                          |
| A00969 | Acute Toxicity, Multiple Dose Effects                                                                 |
| A00970 | Non-toxicity                                                                                          |
| A00971 | Acute Toxicity, Mutagenicity, Tumorigenicity, Skin and Eye Irritation,                                |
| A00972 | Acute Toxicity, Reproductive Effects, Multiple Dose Effects                                           |
| A00973 | Acute Toxicity, Multiple Dose Effects                                                                 |
| A00974 | Acute Toxicity, Mutagenicity, Reproductive Effects, Multiple Dose Effects                             |
| A00975 | Acute Toxicity, Skin and Eye Irritation, Reproductive Effects, Multiple Dose                          |
| A00976 | Acute Toxicity                                                                                        |
| A00977 | Non-toxicity                                                                                          |
| A00978 | Acute Toxicity, Multiple Dose Effects                                                                 |
| A00979 | Acute Toxicity, Mutagenicity, Tumorigenicity, Reproductive Effects                                    |
| A00980 | Non-toxicity                                                                                          |
| A00981 | Acute Toxicity, Mutagenicity, Tumorigenicity, Skin and Eye Irritation,                                |
| A00982 | Non-toxicity                                                                                          |
| A00983 | Acute Toxicity, Reproductive Effects, Multiple Dose Effects                                           |
| A00984 | Acute Toxicity                                                                                        |
| A00985 | Acute Toxicity, Mutagenicity, Reproductive Effects                                                    |
| A00986 | Acute Toxicity, Skin and Eye Irritation, Reproductive Effects                                         |
| A00987 | Acute Toxicity, Mutagenicity, Skin and Eye Irritation, Reproductive Effects,<br>Multiple Dose Effects |
| A00988 | Acute Toxicity                                                                                        |
| A00989 | Acute Toxicity, Mutagenicity, Multiple Dose Effects                                                   |
| A00990 | Acute Toxicity, Reproductive Effects                                                                  |
| A00991 | Acute Toxicity, Multiple Dose Effects                                                                 |
| A00992 | Acute Toxicity, Mutagenicity, Skin and Eye Irritation, Reproductive Effects                           |
| A00993 | Acute Toxicity, Mutagenicity, Skin and Eye Irritation, Multiple Dose Effects                          |
| A00994 | Acute Toxicity, Mutagenicity, Reproductive Effects, Multiple Dose Effects                             |
| A00995 | Acute Toxicity, Mutagenicity, Reproductive Effects, Multiple Dose Effects                             |
| A00996 | Non-toxicity                                                                                          |
| A00997 | Acute Toxicity, Mutagenicity, Multiple Dose Effects                                                   |
| A00998 | Acute Toxicity                                                                                        |
| A00999 | Acute Toxicity, Mutagenicity, Tumorigenicity, Skin and Eye Irritation,<br>Multiple Dose Effects       |

|        |                                                                                                    |
|--------|----------------------------------------------------------------------------------------------------|
| A01000 | Acute Toxicity                                                                                     |
| A01001 | Acute Toxicity, Multiple Dose Effects                                                              |
| A01002 | Acute Toxicity                                                                                     |
| A01003 | Acute Toxicity, Mutagenicity                                                                       |
| A01004 | Acute Toxicity, Mutagenicity, Tumorigenicity, Skin and Eye Irritation,                             |
| A01005 | Acute Toxicity, Mutagenicity, Tumorigenicity, Reproductive Effects,                                |
| A01006 | Acute Toxicity, Mutagenicity, Skin and Eye Irritation, Reproductive Effects, Multiple Dose Effects |
| A01007 | Acute Toxicity, Mutagenicity, Multiple Dose Effects                                                |
| A01008 | Acute Toxicity, Mutagenicity, Tumorigenicity, Skin and Eye Irritation,                             |
| A01009 | Acute Toxicity, Mutagenicity, Skin and Eye Irritation, Reproductive Effects, Multiple Dose Effects |
| A01010 | Acute Toxicity                                                                                     |
| A01011 | Acute Toxicity, Mutagenicity, Tumorigenicity, Reproductive Effects,                                |
| A01012 | Acute Toxicity, Mutagenicity, Reproductive Effects, Multiple Dose Effects                          |
| A01013 | Acute Toxicity, Multiple Dose Effects                                                              |
| A01014 | Acute Toxicity, Reproductive Effects, Multiple Dose Effects                                        |
| A01015 | Acute Toxicity, Reproductive Effects, Multiple Dose Effects                                        |
| A01016 | Acute Toxicity                                                                                     |
| A01017 | Acute Toxicity, Mutagenicity, Reproductive Effects, Multiple Dose Effects                          |
| A01018 | Acute Toxicity, Mutagenicity, Skin and Eye Irritation, Reproductive Effects, Multiple Dose Effects |
| A01019 | Acute Toxicity, Reproductive Effects, Multiple Dose Effects                                        |
| A01020 | Acute Toxicity, Mutagenicity, Skin and Eye Irritation, Reproductive Effects, Multiple Dose Effects |
| A01021 | Acute Toxicity, Mutagenicity, Tumorigenicity, Skin and Eye Irritation,                             |
| A01022 | Acute Toxicity, Mutagenicity, Reproductive Effects, Multiple Dose Effects                          |
| A01023 | Acute Toxicity                                                                                     |
| A01024 | Acute Toxicity                                                                                     |
| A01025 | Acute Toxicity, Reproductive Effects, Multiple Dose Effects                                        |
| A01026 | Acute Toxicity, Mutagenicity, Tumorigenicity, Skin and Eye Irritation,                             |
| A01027 | Acute Toxicity, Mutagenicity, Reproductive Effects, Multiple Dose Effects                          |
| A01028 | Non-toxicity                                                                                       |
| A01029 | Acute Toxicity, Mutagenicity, Multiple Dose Effects                                                |
| A01030 | Acute Toxicity                                                                                     |
| A01031 | Acute Toxicity                                                                                     |
| A01032 | Acute Toxicity, Skin and Eye Irritation, Reproductive Effects, Multiple Dose                       |
| A01033 | Acute Toxicity                                                                                     |
| A01034 | Acute Toxicity, Multiple Dose Effects                                                              |
| A01035 | Acute Toxicity, Mutagenicity, Tumorigenicity, Reproductive Effects,                                |
| A01036 | Acute Toxicity, Mutagenicity, Multiple Dose Effects                                                |
| A01037 | Acute Toxicity, Multiple Dose Effects                                                              |
| A01038 | Acute Toxicity, Multiple Dose Effects                                                              |
| A01039 | Acute Toxicity, Mutagenicity, Reproductive Effects, Multiple Dose Effects                          |
| A01040 | Acute Toxicity, Multiple Dose Effects                                                              |
| A01041 | Multiple Dose Effects                                                                              |



|        |                                                                                                       |
|--------|-------------------------------------------------------------------------------------------------------|
| A01042 | Acute Toxicity, Tumorigenicity                                                                        |
| A01043 | Acute Toxicity, Mutagenicity, Tumorigenicity, Multiple Dose Effects                                   |
| A01044 | Multiple Dose Effects                                                                                 |
| A01045 | Acute Toxicity, Multiple Dose Effects                                                                 |
| A01046 | Acute Toxicity, Mutagenicity, Tumorigenicity, Skin and Eye Irritation,                                |
| A01047 | Acute Toxicity                                                                                        |
| A01048 | Mutagenicity                                                                                          |
| A01049 | Acute Toxicity                                                                                        |
| A01050 | Acute Toxicity                                                                                        |
| A01051 | Mutagenicity                                                                                          |
| A01052 | Acute Toxicity, Mutagenicity                                                                          |
| A01053 | Acute Toxicity                                                                                        |
| A01054 | Acute Toxicity, Reproductive Effects, Multiple Dose Effects                                           |
| A01055 | Acute Toxicity                                                                                        |
| A01056 | Acute Toxicity, Reproductive Effects, Multiple Dose Effects                                           |
| A01057 | Acute Toxicity, Multiple Dose Effects                                                                 |
| A01058 | Acute Toxicity, Mutagenicity, Tumorigenicity, Reproductive Effects,                                   |
| A01059 | Mutagenicity                                                                                          |
| A01060 | Mutagenicity, Tumorigenicity, Reproductive Effects                                                    |
| A01061 | Acute Toxicity                                                                                        |
| A01062 | Acute Toxicity, Reproductive Effects, Multiple Dose Effects                                           |
| A01063 | Acute Toxicity, Mutagenicity, Skin and Eye Irritation, Multiple Dose Effects                          |
| A01064 | Acute Toxicity, Mutagenicity, Tumorigenicity, Reproductive Effects,                                   |
| A01065 | Acute Toxicity                                                                                        |
| A01066 | Acute Toxicity                                                                                        |
| A01067 | Acute Toxicity, Multiple Dose Effects                                                                 |
| A01068 | Acute Toxicity                                                                                        |
| A01069 | Acute Toxicity, Tumorigenicity, Multiple Dose Effects                                                 |
| A01070 | Non-toxicity                                                                                          |
| A01071 | Acute Toxicity, Reproductive Effects, Multiple Dose Effects                                           |
| A01072 | Acute Toxicity, Mutagenicity, Tumorigenicity, Reproductive Effects,                                   |
| A01073 | Acute Toxicity, Multiple Dose Effects                                                                 |
| A01074 | Acute Toxicity, Mutagenicity, Reproductive Effects, Multiple Dose Effects                             |
| A01075 | Acute Toxicity, Mutagenicity, Skin and Eye Irritation, Reproductive Effects,<br>Multiple Dose Effects |
| A01076 | Acute Toxicity                                                                                        |
| A01077 | Acute Toxicity, Mutagenicity, Skin and Eye Irritation, Reproductive Effects                           |
| A01078 | Acute Toxicity, Reproductive Effects                                                                  |
| A01079 | Acute Toxicity, Reproductive Effects, Multiple Dose Effects                                           |
| A01080 | Acute Toxicity, Mutagenicity, Tumorigenicity, Skin and Eye Irritation,                                |
| A01081 | Acute Toxicity, Mutagenicity, Reproductive Effects                                                    |
| A01082 | Acute Toxicity, Mutagenicity, Reproductive Effects, Multiple Dose Effects                             |
| A01083 | Acute Toxicity                                                                                        |
| A01084 | Acute Toxicity, Multiple Dose Effects                                                                 |
| A01085 | Acute Toxicity                                                                                        |
| A01086 | Acute Toxicity, Mutagenicity, Reproductive Effects, Multiple Dose Effects                             |

|        |                                                                                                       |
|--------|-------------------------------------------------------------------------------------------------------|
| A01087 | Acute Toxicity, Reproductive Effects, Multiple Dose Effects                                           |
| A01088 | Acute Toxicity, Mutagenicity, Tumorigenicity, Skin and Eye Irritation,                                |
| A01089 | Acute Toxicity, Skin and Eye Irritation                                                               |
| A01090 | Acute Toxicity, Mutagenicity, Reproductive Effects, Multiple Dose Effects                             |
| A01091 | Acute Toxicity, Mutagenicity, Tumorigenicity, Skin and Eye Irritation,<br>Multiple Dose Effects       |
| A01092 | Acute Toxicity, Multiple Dose Effects                                                                 |
| A01093 | Acute Toxicity, Mutagenicity, Skin and Eye Irritation, Reproductive Effects,<br>Multiple Dose Effects |
| A01094 | Acute Toxicity                                                                                        |
| A01095 | Acute Toxicity                                                                                        |
| A01096 | Acute Toxicity                                                                                        |
| A01097 | Acute Toxicity, Mutagenicity, Tumorigenicity, Multiple Dose Effects                                   |
| A01098 | Acute Toxicity                                                                                        |
| A01099 | Acute Toxicity, Mutagenicity, Skin and Eye Irritation, Reproductive Effects,<br>Multiple Dose Effects |
| A01100 | Non-toxicity                                                                                          |
| A01101 | Acute Toxicity, Multiple Dose Effects                                                                 |
| A01102 | Acute Toxicity, Multiple Dose Effects                                                                 |
| A01103 | Acute Toxicity                                                                                        |
| A01104 | Acute Toxicity, Skin and Eye Irritation, Multiple Dose Effects                                        |
| A01105 | Acute Toxicity, Mutagenicity, Multiple Dose Effects                                                   |
| A01106 | Acute Toxicity, Reproductive Effects, Multiple Dose Effects                                           |
| A01107 | Acute Toxicity, Reproductive Effects, Multiple Dose Effects                                           |
| A01108 | Acute Toxicity, Mutagenicity, Tumorigenicity, Reproductive Effects,                                   |
| A01109 | Acute Toxicity, Mutagenicity, Reproductive Effects, Multiple Dose Effects                             |
| A01110 | Acute Toxicity                                                                                        |
| A01111 | Acute Toxicity, Mutagenicity                                                                          |
| A01112 | Acute Toxicity, Mutagenicity, Tumorigenicity, Reproductive Effects                                    |
| A01113 | Acute Toxicity, Mutagenicity, Reproductive Effects, Multiple Dose Effects                             |
| A01114 | Acute Toxicity, Mutagenicity, Tumorigenicity, Multiple Dose Effects                                   |
| A01115 | Acute Toxicity, Multiple Dose Effects                                                                 |
| A01116 | Acute Toxicity, Mutagenicity                                                                          |
| A01117 | Acute Toxicity, Mutagenicity, Skin and Eye Irritation, Reproductive Effects,<br>Multiple Dose Effects |
| A01118 | Acute Toxicity, Skin and Eye Irritation                                                               |
| A01119 | Acute Toxicity, Multiple Dose Effects                                                                 |
| A01120 | Acute Toxicity, Reproductive Effects                                                                  |
| A01121 | Acute Toxicity, Multiple Dose Effects                                                                 |
| A01122 | Acute Toxicity, Mutagenicity, Skin and Eye Irritation, Reproductive Effects                           |
| A01123 | Non-toxicity                                                                                          |
| A01124 | Acute Toxicity, Mutagenicity, Skin and Eye Irritation, Multiple Dose Effects                          |
| A01125 | Acute Toxicity, Mutagenicity, Tumorigenicity                                                          |
| A01126 | Acute Toxicity                                                                                        |
| A01127 | Acute Toxicity, Reproductive Effects, Multiple Dose Effects                                           |
| A01128 | Acute Toxicity, Mutagenicity                                                                          |

|        |                                                                                                       |
|--------|-------------------------------------------------------------------------------------------------------|
| A01129 | Acute Toxicity                                                                                        |
| A01130 | Acute Toxicity                                                                                        |
| A01131 | Acute Toxicity, Mutagenicity                                                                          |
| A01132 | Acute Toxicity                                                                                        |
| A01133 | Acute Toxicity                                                                                        |
| A01134 | Acute Toxicity                                                                                        |
| A01135 | Non-toxicity                                                                                          |
| A01136 | Acute Toxicity, Mutagenicity, Skin and Eye Irritation                                                 |
| A01137 | Acute Toxicity, Mutagenicity, Tumorigenicity, Skin and Eye Irritation,                                |
| A01138 | Acute Toxicity, Mutagenicity, Tumorigenicity, Skin and Eye Irritation,                                |
| A01139 | Mutagenicity, Reproductive Effects                                                                    |
| A01140 | Acute Toxicity, Tumorigenicity, Reproductive Effects, Multiple Dose Effects                           |
| A01141 | Acute Toxicity                                                                                        |
| A01142 | Acute Toxicity, Mutagenicity, Tumorigenicity, Reproductive Effects,                                   |
| A01143 | Acute Toxicity, Mutagenicity                                                                          |
| A01144 | Acute Toxicity, Reproductive Effects, Multiple Dose Effects                                           |
| A01145 | Acute Toxicity, Mutagenicity, Multiple Dose Effects                                                   |
| A01146 | Non-toxicity                                                                                          |
| A01147 | Acute Toxicity                                                                                        |
| A01148 | Acute Toxicity, Mutagenicity                                                                          |
| A01149 | Acute Toxicity, Mutagenicity, Multiple Dose Effects                                                   |
| A01150 | Acute Toxicity, Tumorigenicity, Reproductive Effects                                                  |
| A01151 | Acute Toxicity, Mutagenicity, Tumorigenicity, Reproductive Effects,                                   |
| A01152 | Acute Toxicity, Mutagenicity                                                                          |
| A01153 | Acute Toxicity, Multiple Dose Effects                                                                 |
| A01154 | Acute Toxicity, Mutagenicity, Skin and Eye Irritation, Reproductive Effects,<br>Multiple Dose Effects |
| A01155 | Acute Toxicity, Reproductive Effects                                                                  |
| A01156 | Acute Toxicity, Mutagenicity, Tumorigenicity, Skin and Eye Irritation,                                |
| A01157 | Acute Toxicity, Mutagenicity, Tumorigenicity                                                          |
| A01158 | Acute Toxicity, Multiple Dose Effects                                                                 |
| A01159 | Acute Toxicity, Skin and Eye Irritation                                                               |
| A01160 | Acute Toxicity, Multiple Dose Effects                                                                 |
| A01161 | Acute Toxicity, Mutagenicity, Tumorigenicity, Skin and Eye Irritation,                                |
| A01162 | Acute Toxicity, Mutagenicity, Tumorigenicity, Reproductive Effects,                                   |
| A01163 | Acute Toxicity, Skin and Eye Irritation                                                               |
| A01164 | Acute Toxicity, Mutagenicity, Skin and Eye Irritation                                                 |
| A01165 | Acute Toxicity, Mutagenicity, Multiple Dose Effects                                                   |
| A01166 | Acute Toxicity, Mutagenicity, Tumorigenicity, Reproductive Effects                                    |
| A01167 | Acute Toxicity                                                                                        |
| A01168 | Acute Toxicity, Mutagenicity, Multiple Dose Effects                                                   |
| A01169 | Acute Toxicity, Mutagenicity, Tumorigenicity, Skin and Eye Irritation,                                |
| A01170 | Acute Toxicity                                                                                        |
| A01171 | Acute Toxicity                                                                                        |
| A01172 | Acute Toxicity                                                                                        |
| A01173 | Mutagenicity                                                                                          |

|        |                                                                                                    |
|--------|----------------------------------------------------------------------------------------------------|
| A01174 | Acute Toxicity, Mutagenicity, Skin and Eye Irritation, Reproductive Effects                        |
| A01175 | Acute Toxicity, Mutagenicity, Reproductive Effects, Multiple Dose Effects                          |
| A01176 | Acute Toxicity                                                                                     |
| A01177 | Acute Toxicity, Skin and Eye Irritation, Multiple Dose Effects                                     |
| A01178 | Acute Toxicity, Multiple Dose Effects                                                              |
| A01179 | Acute Toxicity, Multiple Dose Effects                                                              |
| A01180 | Acute Toxicity                                                                                     |
| A01181 | Acute Toxicity                                                                                     |
| A01182 | Acute Toxicity                                                                                     |
| A01183 | Mutagenicity                                                                                       |
| A01184 | Acute Toxicity, Mutagenicity, Skin and Eye Irritation, Reproductive Effects, Multiple Dose Effects |
| A01185 | Acute Toxicity, Tumorigenicity, Multiple Dose Effects                                              |
| A01186 | Acute Toxicity, Mutagenicity, Reproductive Effects                                                 |
| A01187 | Acute Toxicity, Mutagenicity, Skin and Eye Irritation, Reproductive Effects, Multiple Dose Effects |
| A01188 | Acute Toxicity                                                                                     |
| A01189 | Acute Toxicity, Mutagenicity, Tumorigenicity, Skin and Eye Irritation, Multiple Dose Effects       |
| A01190 | Acute Toxicity                                                                                     |
| A01191 | Acute Toxicity, Mutagenicity, Reproductive Effects, Multiple Dose Effects                          |
| A01192 | Acute Toxicity, Reproductive Effects, Multiple Dose Effects                                        |
| A01193 | Acute Toxicity                                                                                     |
| A01194 | Acute Toxicity                                                                                     |
| A01195 | Acute Toxicity, Reproductive Effects, Multiple Dose Effects                                        |
| A01196 | Acute Toxicity, Multiple Dose Effects                                                              |
| A01197 | Acute Toxicity, Multiple Dose Effects                                                              |
| A01198 | Acute Toxicity, Skin and Eye Irritation                                                            |
| A01199 | Non-toxicity                                                                                       |
| A01200 | Acute Toxicity, Mutagenicity, Multiple Dose Effects                                                |
| A01201 | Acute Toxicity, Mutagenicity, Skin and Eye Irritation, Reproductive Effects, Multiple Dose Effects |
| A01202 | Acute Toxicity, Skin and Eye Irritation                                                            |
| A01203 | Acute Toxicity, Reproductive Effects, Multiple Dose Effects                                        |
| A01204 | Acute Toxicity, Tumorigenicity, Reproductive Effects, Multiple Dose Effects                        |
| A01205 | Acute Toxicity, Mutagenicity, Tumorigenicity, Multiple Dose Effects                                |
| A01206 | Acute Toxicity, Reproductive Effects, Multiple Dose Effects                                        |
| A01207 | Acute Toxicity                                                                                     |
| A01208 | Acute Toxicity, Mutagenicity, Skin and Eye Irritation                                              |
| A01209 | Acute Toxicity, Mutagenicity, Multiple Dose Effects                                                |
| A01210 | Acute Toxicity, Mutagenicity, Tumorigenicity, Skin and Eye Irritation,                             |
| A01211 | Acute Toxicity, Tumorigenicity, Reproductive Effects, Multiple Dose Effects                        |
| A01212 | Acute Toxicity, Mutagenicity, Tumorigenicity, Multiple Dose Effects                                |
| A01213 | Acute Toxicity, Tumorigenicity, Multiple Dose Effects                                              |
| A01214 | Acute Toxicity, Mutagenicity, Multiple Dose Effects                                                |
| A01215 | Acute Toxicity, Mutagenicity, Skin and Eye Irritation                                              |

|        |                                                                                                    |
|--------|----------------------------------------------------------------------------------------------------|
| A01216 | Acute Toxicity, Mutagenicity, Tumorigenicity, Reproductive Effects                                 |
| A01217 | Acute Toxicity, Skin and Eye Irritation, Reproductive Effects, Multiple Dose                       |
| A01218 | Acute Toxicity                                                                                     |
| A01219 | Acute Toxicity, Reproductive Effects, Multiple Dose Effects                                        |
| A01220 | Acute Toxicity, Mutagenicity, Skin and Eye Irritation, Reproductive Effects, Multiple Dose Effects |
| A01221 | Acute Toxicity, Mutagenicity, Skin and Eye Irritation, Reproductive Effects                        |
| A01222 | Acute Toxicity, Mutagenicity, Skin and Eye Irritation, Multiple Dose Effects                       |
| A01223 | Acute Toxicity, Mutagenicity, Skin and Eye Irritation, Reproductive Effects, Multiple Dose Effects |
| A01224 | Acute Toxicity, Mutagenicity, Tumorigenicity                                                       |
| A01225 | Acute Toxicity, Mutagenicity, Multiple Dose Effects                                                |
| A01226 | Acute Toxicity, Mutagenicity, Multiple Dose Effects                                                |
| A01227 | Acute Toxicity, Mutagenicity, Multiple Dose Effects                                                |
| A01228 | Acute Toxicity, Skin and Eye Irritation                                                            |
| A01229 | Acute Toxicity                                                                                     |
| A01230 | Acute Toxicity, Mutagenicity, Tumorigenicity, Reproductive Effects,                                |
| A01231 | Acute Toxicity, Multiple Dose Effects                                                              |
| A01232 | Acute Toxicity, Mutagenicity, Reproductive Effects, Multiple Dose Effects                          |
| A01233 | Acute Toxicity, Mutagenicity, Tumorigenicity, Reproductive Effects,                                |
| A01234 | Acute Toxicity, Mutagenicity, Tumorigenicity, Skin and Eye Irritation,                             |
| A01235 | Acute Toxicity, Mutagenicity, Tumorigenicity, Skin and Eye Irritation,                             |
| A01236 | Acute Toxicity                                                                                     |
| A01237 | Acute Toxicity                                                                                     |
| A01238 | Acute Toxicity, Multiple Dose Effects                                                              |
| A01239 | Acute Toxicity                                                                                     |
| A01240 | Acute Toxicity                                                                                     |
| A01241 | Acute Toxicity, Multiple Dose Effects                                                              |
| A01242 | Acute Toxicity, Reproductive Effects, Multiple Dose Effects                                        |
| A01243 | Acute Toxicity, Mutagenicity, Skin and Eye Irritation, Reproductive Effects                        |
| A01244 | Acute Toxicity, Mutagenicity, Tumorigenicity, Reproductive Effects,                                |
| A01245 | Acute Toxicity                                                                                     |
| A01246 | Acute Toxicity, Reproductive Effects, Multiple Dose Effects                                        |
| A01247 | Acute Toxicity, Multiple Dose Effects                                                              |
| A01248 | Acute Toxicity, Mutagenicity                                                                       |
| A01249 | Acute Toxicity                                                                                     |
| A01250 | Acute Toxicity                                                                                     |
| A01251 | Acute Toxicity                                                                                     |
| A01252 | Mutagenicity, Tumorigenicity, Multiple Dose Effects                                                |
| A01253 | Acute Toxicity                                                                                     |
| A01254 | Acute Toxicity, Mutagenicity, Tumorigenicity, Reproductive Effects                                 |
| A01255 | Acute Toxicity, Reproductive Effects                                                               |
| A01256 | Acute Toxicity, Mutagenicity, Multiple Dose Effects                                                |
| A01257 | Acute Toxicity, Mutagenicity, Tumorigenicity, Skin and Eye Irritation, Multiple Dose Effects       |
| A01258 | Acute Toxicity, Skin and Eye Irritation                                                            |

|        |                                                                                                    |
|--------|----------------------------------------------------------------------------------------------------|
| A01259 | Acute Toxicity                                                                                     |
| A01260 | Acute Toxicity                                                                                     |
| A01261 | Acute Toxicity, Multiple Dose Effects                                                              |
| A01262 | Non-toxicity                                                                                       |
| A01263 | Acute Toxicity, Reproductive Effects, Multiple Dose Effects                                        |
| A01264 | Acute Toxicity, Multiple Dose Effects                                                              |
| A01265 | Acute Toxicity                                                                                     |
| A01266 | Acute Toxicity, Multiple Dose Effects                                                              |
| A01267 | Acute Toxicity, Tumorigenicity, Multiple Dose Effects                                              |
| A01268 | Acute Toxicity, Reproductive Effects, Multiple Dose Effects                                        |
| A01269 | Acute Toxicity, Mutagenicity                                                                       |
| A01270 | Acute Toxicity, Multiple Dose Effects                                                              |
| A01271 | Acute Toxicity, Multiple Dose Effects                                                              |
| A01272 | Acute Toxicity, Mutagenicity, Skin and Eye Irritation, Reproductive Effects, Multiple Dose Effects |
| A01273 | Acute Toxicity                                                                                     |
| A01274 | Acute Toxicity                                                                                     |
| A01275 | Acute Toxicity, Mutagenicity, Tumorigenicity, Skin and Eye Irritation,                             |
| A01276 | Acute Toxicity, Mutagenicity, Tumorigenicity, Skin and Eye Irritation,                             |
| A01277 | Skin and Eye Irritation, Reproductive Effects                                                      |
| A01278 | Acute Toxicity, Mutagenicity, Skin and Eye Irritation, Reproductive Effects, Multiple Dose Effects |
| A01279 | Acute Toxicity, Skin and Eye Irritation, Multiple Dose Effects                                     |
| A01280 | Acute Toxicity, Mutagenicity                                                                       |
| A01281 | Acute Toxicity, Reproductive Effects, Multiple Dose Effects                                        |
| A01282 | Acute Toxicity                                                                                     |
| A01283 | Tumorigenicity                                                                                     |
| A01284 | Acute Toxicity                                                                                     |
| A01285 | Acute Toxicity                                                                                     |
| A01286 | Acute Toxicity, Mutagenicity, Skin and Eye Irritation, Multiple Dose Effects                       |
| A01287 | Acute Toxicity                                                                                     |
| A01288 | Acute Toxicity, Reproductive Effects, Multiple Dose Effects                                        |
| A01289 | Acute Toxicity, Mutagenicity, Tumorigenicity, Reproductive Effects,                                |
| A01290 | Acute Toxicity, Mutagenicity, Tumorigenicity, Skin and Eye Irritation                              |
| A01291 | Acute Toxicity, Mutagenicity, Reproductive Effects                                                 |
| A01292 | Acute Toxicity                                                                                     |
| A01293 | Acute Toxicity, Mutagenicity, Reproductive Effects, Multiple Dose Effects                          |
| A01294 | Acute Toxicity, Multiple Dose Effects                                                              |
| A01295 | Non-toxicity                                                                                       |
| A01296 | Acute Toxicity, Skin and Eye Irritation, Reproductive Effects, Multiple Dose                       |
| A01297 | Acute Toxicity, Mutagenicity, Tumorigenicity, Skin and Eye Irritation,                             |
| A01298 | Acute Toxicity, Multiple Dose Effects                                                              |
| A01299 | Acute Toxicity, Mutagenicity                                                                       |
| A01300 | Acute Toxicity                                                                                     |
| A01301 | Acute Toxicity, Reproductive Effects                                                               |
| A01302 | Acute Toxicity, Multiple Dose Effects                                                              |

|        |                                                                                              |
|--------|----------------------------------------------------------------------------------------------|
| A01303 | Non-toxicity                                                                                 |
| A01304 | Acute Toxicity, Mutagenicity, Reproductive Effects, Multiple Dose Effects                    |
| A01305 | Mutagenicity                                                                                 |
| A01306 | Acute Toxicity, Reproductive Effects                                                         |
| A01307 | Acute Toxicity, Mutagenicity, Tumorigenicity, Skin and Eye Irritation, Multiple Dose Effects |
| A01308 | Acute Toxicity, Mutagenicity, Multiple Dose Effects                                          |
| A01309 | Reproductive Effects, Multiple Dose Effects                                                  |
| A01310 | Mutagenicity                                                                                 |
| A01311 | Acute Toxicity                                                                               |
| A01312 | Acute Toxicity                                                                               |
| A01313 | Skin and Eye Irritation                                                                      |
| A01314 | Acute Toxicity                                                                               |
| A01315 | Acute Toxicity, Mutagenicity, Reproductive Effects, Multiple Dose Effects                    |
| A01316 | Non-toxicity                                                                                 |
| A01317 | Acute Toxicity, Tumorigenicity, Reproductive Effects, Multiple Dose Effects                  |
| A01318 | Acute Toxicity, Reproductive Effects, Multiple Dose Effects                                  |
| A01319 | Acute Toxicity                                                                               |
| A01320 | Acute Toxicity, Mutagenicity, Tumorigenicity, Skin and Eye Irritation,                       |
| A01321 | Acute Toxicity, Mutagenicity, Tumorigenicity, Skin and Eye Irritation                        |
| A01322 | Acute Toxicity, Mutagenicity, Tumorigenicity, Skin and Eye Irritation, Multiple Dose Effects |
| A01323 | Acute Toxicity, Reproductive Effects                                                         |
| A01324 | Acute Toxicity, Reproductive Effects                                                         |
| A01325 | Acute Toxicity, Mutagenicity, Tumorigenicity, Skin and Eye Irritation,                       |
| A01326 | Acute Toxicity, Mutagenicity                                                                 |
| A01327 | Acute Toxicity, Mutagenicity, Tumorigenicity, Skin and Eye Irritation,                       |
| A01328 | Acute Toxicity, Mutagenicity, Tumorigenicity, Skin and Eye Irritation,                       |
| A01329 | Acute Toxicity, Mutagenicity, Multiple Dose Effects                                          |
| A01330 | Acute Toxicity, Reproductive Effects                                                         |
| A01331 | Acute Toxicity, Mutagenicity, Tumorigenicity, Reproductive Effects,                          |
| A01332 | Acute Toxicity, Mutagenicity, Tumorigenicity, Multiple Dose Effects                          |
| A01333 | Non-toxicity                                                                                 |
| A01334 | Acute Toxicity, Multiple Dose Effects                                                        |
| A01335 | Acute Toxicity, Tumorigenicity, Reproductive Effects, Multiple Dose Effects                  |
| A01336 | Acute Toxicity                                                                               |
| A01337 | Acute Toxicity, Reproductive Effects                                                         |
| A01338 | Acute Toxicity, Tumorigenicity, Multiple Dose Effects                                        |
| A01339 | Acute Toxicity, Skin and Eye Irritation, Reproductive Effects, Multiple Dose                 |
| A01340 | Acute Toxicity, Reproductive Effects, Multiple Dose Effects                                  |
| A01341 | Acute Toxicity, Multiple Dose Effects                                                        |
| A01342 | Acute Toxicity, Skin and Eye Irritation, Multiple Dose Effects                               |
| A01343 | Acute Toxicity, Mutagenicity, Tumorigenicity, Multiple Dose Effects                          |
| A01344 | Acute Toxicity, Multiple Dose Effects                                                        |
| A01345 | Acute Toxicity, Mutagenicity, Tumorigenicity, Reproductive Effects,                          |
| A01346 | Acute Toxicity, Tumorigenicity, Multiple Dose Effects                                        |

|        |                                                                                                    |
|--------|----------------------------------------------------------------------------------------------------|
| A01347 | Acute Toxicity, Mutagenicity, Skin and Eye Irritation, Reproductive Effects, Multiple Dose Effects |
| A01348 | Acute Toxicity, Mutagenicity, Multiple Dose Effects                                                |
| A01349 | Acute Toxicity                                                                                     |
| A01350 | Non-toxicity                                                                                       |
| A01351 | Acute Toxicity, Reproductive Effects, Multiple Dose Effects                                        |
| A01352 | Acute Toxicity, Mutagenicity, Reproductive Effects, Multiple Dose Effects                          |
| A01353 | Acute Toxicity, Mutagenicity, Skin and Eye Irritation, Multiple Dose Effects                       |
| A01354 | Acute Toxicity                                                                                     |
| A01355 | Acute Toxicity                                                                                     |
| A01356 | Acute Toxicity                                                                                     |
| A01357 | Mutagenicity                                                                                       |
| A01358 | Acute Toxicity, Mutagenicity, Tumorigenicity, Reproductive Effects,                                |
| A01359 | Acute Toxicity, Mutagenicity, Tumorigenicity, Reproductive Effects,                                |
| A01360 | Acute Toxicity, Mutagenicity, Tumorigenicity, Skin and Eye Irritation,                             |
| A01361 | Acute Toxicity                                                                                     |
| A01362 | Acute Toxicity                                                                                     |
| A01363 | Acute Toxicity, Skin and Eye Irritation                                                            |
| A01364 | Acute Toxicity, Mutagenicity, Skin and Eye Irritation, Reproductive Effects, Multiple Dose Effects |
| A01365 | Acute Toxicity, Mutagenicity, Skin and Eye Irritation, Reproductive Effects, Multiple Dose Effects |
| A01366 | Acute Toxicity, Mutagenicity, Tumorigenicity, Skin and Eye Irritation,                             |
| A01367 | Acute Toxicity, Mutagenicity, Tumorigenicity, Skin and Eye Irritation,                             |
| A01368 | Acute Toxicity, Reproductive Effects                                                               |
| A01369 | Acute Toxicity, Reproductive Effects                                                               |
| A01370 | Acute Toxicity, Mutagenicity, Skin and Eye Irritation, Reproductive Effects, Multiple Dose Effects |
| A01371 | Acute Toxicity                                                                                     |
| A01372 | Acute Toxicity, Skin and Eye Irritation, Multiple Dose Effects                                     |
| A01373 | Acute Toxicity, Mutagenicity                                                                       |
| A01374 | Non-toxicity                                                                                       |
| A01375 | Acute Toxicity, Mutagenicity, Skin and Eye Irritation, Reproductive Effects, Multiple Dose Effects |
| A01376 | Acute Toxicity                                                                                     |
| A01377 | Acute Toxicity, Skin and Eye Irritation, Reproductive Effects, Multiple Dose                       |
| A01378 | Acute Toxicity, Mutagenicity, Reproductive Effects, Multiple Dose Effects                          |
| A01379 | Acute Toxicity                                                                                     |
| A01380 | Acute Toxicity                                                                                     |
| A01381 | Acute Toxicity, Multiple Dose Effects                                                              |
| A01382 | Acute Toxicity, Mutagenicity, Reproductive Effects, Multiple Dose Effects                          |
| A01383 | Acute Toxicity, Mutagenicity, Tumorigenicity, Multiple Dose Effects                                |
| A01384 | Acute Toxicity, Mutagenicity                                                                       |
| A01385 | Acute Toxicity, Mutagenicity, Tumorigenicity, Skin and Eye Irritation,                             |
| A01386 | Acute Toxicity, Mutagenicity, Skin and Eye Irritation, Reproductive Effects                        |
| A01387 | Acute Toxicity                                                                                     |



|        |                                                                                                       |
|--------|-------------------------------------------------------------------------------------------------------|
| A01388 | Acute Toxicity, Mutagenicity                                                                          |
| A01389 | Acute Toxicity                                                                                        |
| A01390 | Acute Toxicity, Multiple Dose Effects                                                                 |
| A01391 | Acute Toxicity, Reproductive Effects, Multiple Dose Effects                                           |
| A01392 | Acute Toxicity, Reproductive Effects, Multiple Dose Effects                                           |
| A01393 | Acute Toxicity                                                                                        |
| A01394 | Acute Toxicity, Multiple Dose Effects                                                                 |
| A01395 | Non-toxicity                                                                                          |
| A01396 | Acute Toxicity, Mutagenicity, Skin and Eye Irritation                                                 |
| A01397 | Acute Toxicity, Mutagenicity, Reproductive Effects, Multiple Dose Effects                             |
| A01398 | Acute Toxicity, Mutagenicity, Tumorigenicity, Multiple Dose Effects                                   |
| A01399 | Acute Toxicity, Mutagenicity, Reproductive Effects, Multiple Dose Effects                             |
| A01400 | Acute Toxicity, Mutagenicity, Tumorigenicity, Reproductive Effects,                                   |
| A01401 | Acute Toxicity, Mutagenicity, Multiple Dose Effects                                                   |
| A01402 | Acute Toxicity, Mutagenicity, Tumorigenicity, Skin and Eye Irritation                                 |
| A01403 | Acute Toxicity, Reproductive Effects, Multiple Dose Effects                                           |
| A01404 | Acute Toxicity, Mutagenicity, Tumorigenicity, Skin and Eye Irritation,                                |
| A01405 | Acute Toxicity, Mutagenicity, Skin and Eye Irritation, Reproductive Effects                           |
| A01406 | Acute Toxicity, Mutagenicity, Tumorigenicity, Reproductive Effects,                                   |
| A01407 | Acute Toxicity, Reproductive Effects                                                                  |
| A01408 | Acute Toxicity, Mutagenicity, Reproductive Effects                                                    |
| A01409 | Acute Toxicity, Mutagenicity, Tumorigenicity, Skin and Eye Irritation,                                |
| A01410 | Acute Toxicity, Mutagenicity                                                                          |
| A01411 | Acute Toxicity                                                                                        |
| A01412 | Acute Toxicity, Skin and Eye Irritation                                                               |
| A01413 | Acute Toxicity, Tumorigenicity, Reproductive Effects                                                  |
| A01414 | Non-toxicity                                                                                          |
| A01415 | Acute Toxicity, Mutagenicity, Skin and Eye Irritation, Reproductive Effects,<br>Multiple Dose Effects |
| A01416 | Acute Toxicity, Mutagenicity, Multiple Dose Effects                                                   |
| A01417 | Acute Toxicity, Mutagenicity, Multiple Dose Effects                                                   |
| A01418 | Acute Toxicity, Mutagenicity, Skin and Eye Irritation, Multiple Dose Effects                          |
| A01419 | Acute Toxicity, Tumorigenicity, Multiple Dose Effects                                                 |
| A01420 | Acute Toxicity, Skin and Eye Irritation                                                               |
| A01421 | Non-toxicity                                                                                          |
| A01422 | Acute Toxicity, Reproductive Effects, Multiple Dose Effects                                           |
| A01423 | Acute Toxicity                                                                                        |
| A01424 | Multiple Dose Effects                                                                                 |
| A01425 | Acute Toxicity, Mutagenicity                                                                          |
| A01426 | Acute Toxicity                                                                                        |
| A01427 | Acute Toxicity, Reproductive Effects, Multiple Dose Effects                                           |
| A01428 | Acute Toxicity, Skin and Eye Irritation, Multiple Dose Effects                                        |
| A01429 | Acute Toxicity, Reproductive Effects, Multiple Dose Effects                                           |
| A01430 | Acute Toxicity                                                                                        |
| A01431 | Acute Toxicity, Mutagenicity, Tumorigenicity, Reproductive Effects,                                   |
| A01432 | Acute Toxicity, Mutagenicity, Skin and Eye Irritation, Multiple Dose Effects                          |

|        |                                                                                                       |
|--------|-------------------------------------------------------------------------------------------------------|
| A01433 | Acute Toxicity, Reproductive Effects, Multiple Dose Effects                                           |
| A01434 | Acute Toxicity, Mutagenicity, Reproductive Effects, Multiple Dose Effects                             |
| A01435 | Acute Toxicity, Reproductive Effects, Multiple Dose Effects                                           |
| A01436 | Acute Toxicity, Mutagenicity, Reproductive Effects, Multiple Dose Effects                             |
| A01437 | Acute Toxicity, Multiple Dose Effects                                                                 |
| A01438 | Acute Toxicity, Mutagenicity, Tumorigenicity, Reproductive Effects,                                   |
| A01439 | Acute Toxicity, Multiple Dose Effects                                                                 |
| A01440 | Acute Toxicity                                                                                        |
| A01441 | Acute Toxicity, Multiple Dose Effects                                                                 |
| A01442 | Multiple Dose Effects                                                                                 |
| A01443 | Acute Toxicity, Multiple Dose Effects                                                                 |
| A01444 | Acute Toxicity, Skin and Eye Irritation, Reproductive Effects, Multiple Dose                          |
| A01445 | Acute Toxicity                                                                                        |
| A01446 | Acute Toxicity, Multiple Dose Effects                                                                 |
| A01447 | Acute Toxicity, Reproductive Effects, Multiple Dose Effects                                           |
| A01448 | Acute Toxicity, Mutagenicity, Reproductive Effects, Multiple Dose Effects                             |
| A01449 | Acute Toxicity, Reproductive Effects, Multiple Dose Effects                                           |
| A01450 | Acute Toxicity, Mutagenicity, Skin and Eye Irritation                                                 |
| A01451 | Acute Toxicity, Mutagenicity, Tumorigenicity, Skin and Eye Irritation,                                |
| A01452 | Acute Toxicity, Mutagenicity, Skin and Eye Irritation, Reproductive Effects,<br>Multiple Dose Effects |
| A01453 | Acute Toxicity, Mutagenicity, Tumorigenicity, Skin and Eye Irritation,                                |
| A01454 | Acute Toxicity, Mutagenicity, Tumorigenicity, Skin and Eye Irritation,                                |
| A01455 | Acute Toxicity                                                                                        |
| A01456 | Acute Toxicity, Multiple Dose Effects                                                                 |
| A01457 | Acute Toxicity, Mutagenicity, Tumorigenicity, Reproductive Effects,                                   |
| A01458 | Acute Toxicity, Mutagenicity, Tumorigenicity, Skin and Eye Irritation,                                |
| A01459 | Acute Toxicity, Mutagenicity, Tumorigenicity, Skin and Eye Irritation,                                |
| A01460 | Acute Toxicity, Mutagenicity, Tumorigenicity, Reproductive Effects,                                   |
| A01461 | Acute Toxicity, Mutagenicity, Tumorigenicity, Skin and Eye Irritation,                                |
| A01462 | Acute Toxicity, Mutagenicity                                                                          |
| A01463 | Acute Toxicity, Skin and Eye Irritation, Reproductive Effects, Multiple Dose                          |
| A01464 | Acute Toxicity, Mutagenicity, Reproductive Effects                                                    |
| A01465 | Acute Toxicity                                                                                        |
| A01466 | Acute Toxicity                                                                                        |
| A01467 | Acute Toxicity                                                                                        |
| A01468 | Acute Toxicity, Mutagenicity, Tumorigenicity, Reproductive Effects,                                   |
| A01469 | Acute Toxicity, Reproductive Effects, Multiple Dose Effects                                           |
| A01470 | Acute Toxicity, Reproductive Effects                                                                  |
| A01471 | Acute Toxicity                                                                                        |
| A01472 | Acute Toxicity                                                                                        |
| A01473 | Acute Toxicity, Mutagenicity, Skin and Eye Irritation                                                 |
| A01474 | Acute Toxicity, Mutagenicity, Skin and Eye Irritation, Reproductive Effects,<br>Multiple Dose Effects |
| A01475 | Acute Toxicity, Mutagenicity                                                                          |
| A01476 | Acute Toxicity                                                                                        |

|        |                                                                                                    |
|--------|----------------------------------------------------------------------------------------------------|
| A01477 | Acute Toxicity                                                                                     |
| A01478 | Acute Toxicity, Mutagenicity, Tumorigenicity, Skin and Eye Irritation,                             |
| A01479 | Acute Toxicity, Mutagenicity, Skin and Eye Irritation, Reproductive Effects, Multiple Dose Effects |
| A01480 | Acute Toxicity                                                                                     |
| A01481 | Acute Toxicity, Mutagenicity, Tumorigenicity, Skin and Eye Irritation,                             |
| A01482 | Acute Toxicity                                                                                     |
| A01483 | Acute Toxicity, Mutagenicity                                                                       |
| A01484 | Acute Toxicity, Mutagenicity, Tumorigenicity, Reproductive Effects,                                |
| A01485 | Acute Toxicity                                                                                     |
| A01486 | Acute Toxicity, Mutagenicity, Skin and Eye Irritation, Reproductive Effects, Multiple Dose Effects |
| A01487 | Acute Toxicity                                                                                     |
| A01488 | Acute Toxicity                                                                                     |
| A01489 | Mutagenicity                                                                                       |
| A01490 | Acute Toxicity, Mutagenicity                                                                       |
| A01491 | Acute Toxicity                                                                                     |
| A01492 | Acute Toxicity, Mutagenicity, Skin and Eye Irritation, Reproductive Effects, Multiple Dose Effects |
| A01493 | Acute Toxicity                                                                                     |
| A01494 | Acute Toxicity, Mutagenicity, Tumorigenicity, Reproductive Effects,                                |
| A01495 | Acute Toxicity, Mutagenicity, Reproductive Effects                                                 |
| A01496 | Acute Toxicity, Reproductive Effects, Multiple Dose Effects                                        |
| A01497 | Acute Toxicity                                                                                     |
| A01498 | Acute Toxicity                                                                                     |
| A01499 | Mutagenicity, Tumorigenicity, Skin and Eye Irritation, Reproductive Effects, Multiple Dose Effects |
| A01500 | Acute Toxicity, Skin and Eye Irritation, Reproductive Effects, Multiple Dose                       |
| A01501 | Acute Toxicity, Skin and Eye Irritation, Reproductive Effects                                      |
| A01502 | Acute Toxicity                                                                                     |
| A01503 | Acute Toxicity, Mutagenicity, Reproductive Effects, Multiple Dose Effects                          |
| A01504 | Acute Toxicity, Tumorigenicity, Multiple Dose Effects                                              |
| A01505 | Acute Toxicity, Mutagenicity, Reproductive Effects, Multiple Dose Effects                          |
| A01506 | Acute Toxicity                                                                                     |
| A01507 | Acute Toxicity, Mutagenicity, Tumorigenicity, Skin and Eye Irritation,                             |
| A01508 | Acute Toxicity, Mutagenicity, Tumorigenicity, Skin and Eye Irritation,                             |
| A01509 | Reproductive Effects, Multiple Dose Effects                                                        |
| A01510 | Mutagenicity, Reproductive Effects, Multiple Dose Effects                                          |
| A01511 | Acute Toxicity, Multiple Dose Effects                                                              |
| A01512 | Acute Toxicity, Mutagenicity, Tumorigenicity, Reproductive Effects,                                |
| A01513 | Mutagenicity                                                                                       |
| A01514 | Acute Toxicity, Mutagenicity, Tumorigenicity, Skin and Eye Irritation,                             |
| A01515 | Acute Toxicity, Mutagenicity, Tumorigenicity, Reproductive Effects,                                |
| A01516 | Non-toxicity                                                                                       |
| A01517 | Skin and Eye Irritation                                                                            |
| A01518 | Acute Toxicity, Skin and Eye Irritation, Reproductive Effects, Multiple Dose                       |

|        |                                                                                                 |
|--------|-------------------------------------------------------------------------------------------------|
| A01519 | Acute Toxicity, Reproductive Effects, Multiple Dose Effects                                     |
| A01520 | Acute Toxicity, Mutagenicity, Reproductive Effects                                              |
| A01521 | Acute Toxicity                                                                                  |
| A01522 | Acute Toxicity, Mutagenicity, Tumorigenicity, Reproductive Effects,                             |
| A01523 | Reproductive Effects                                                                            |
| A01524 | Acute Toxicity                                                                                  |
| A01525 | Tumorigenicity, Reproductive Effects                                                            |
| A01526 | Acute Toxicity, Mutagenicity, Tumorigenicity, Multiple Dose Effects                             |
| A01527 | Acute Toxicity, Mutagenicity                                                                    |
| A01528 | Mutagenicity                                                                                    |
| A01529 | Mutagenicity, Tumorigenicity                                                                    |
| A01530 | Acute Toxicity, Mutagenicity, Tumorigenicity, Reproductive Effects                              |
| A01531 | Acute Toxicity                                                                                  |
| A01532 | Acute Toxicity                                                                                  |
| A01533 | Acute Toxicity, Mutagenicity, Reproductive Effects, Multiple Dose Effects                       |
| A01534 | Acute Toxicity                                                                                  |
| A01535 | Acute Toxicity, Multiple Dose Effects                                                           |
| A01536 | Acute Toxicity, Mutagenicity, Tumorigenicity, Skin and Eye Irritation,<br>Multiple Dose Effects |
| A01537 | Acute Toxicity, Mutagenicity, Tumorigenicity, Skin and Eye Irritation,                          |
| A01538 | Acute Toxicity, Tumorigenicity                                                                  |
| A01539 | Acute Toxicity, Skin and Eye Irritation, Reproductive Effects, Multiple Dose                    |
| A01540 | Acute Toxicity, Multiple Dose Effects                                                           |
| A01541 | Acute Toxicity                                                                                  |
| A01542 | Acute Toxicity, Reproductive Effects, Multiple Dose Effects                                     |
| A01543 | Acute Toxicity, Mutagenicity, Tumorigenicity, Reproductive Effects,                             |
| A01544 | Acute Toxicity, Tumorigenicity, Skin and Eye Irritation, Multiple Dose                          |
| A01545 | Acute Toxicity, Mutagenicity                                                                    |
| A01546 | Acute Toxicity, Mutagenicity                                                                    |
| A01547 | Acute Toxicity, Mutagenicity, Skin and Eye Irritation, Multiple Dose Effects                    |
| A01548 | Acute Toxicity, Mutagenicity, Reproductive Effects, Multiple Dose Effects                       |
| A01549 | Mutagenicity, Reproductive Effects                                                              |
| A01550 | Acute Toxicity, Mutagenicity, Skin and Eye Irritation                                           |
| A01551 | Acute Toxicity, Mutagenicity, Tumorigenicity, Skin and Eye Irritation,                          |
| A01552 | Acute Toxicity, Tumorigenicity, Skin and Eye Irritation                                         |
| A01553 | Mutagenicity                                                                                    |
| A01554 | Mutagenicity                                                                                    |
| A01555 | Acute Toxicity, Tumorigenicity, Reproductive Effects, Multiple Dose Effects                     |
| A01556 | Acute Toxicity, Mutagenicity, Tumorigenicity, Multiple Dose Effects                             |
| A01557 | Acute Toxicity, Mutagenicity, Tumorigenicity, Reproductive Effects,                             |
| A01558 | Acute Toxicity, Mutagenicity, Multiple Dose Effects                                             |
| A01559 | Acute Toxicity, Mutagenicity, Tumorigenicity, Skin and Eye Irritation,                          |
| A01560 | Acute Toxicity, Mutagenicity, Multiple Dose Effects                                             |
| A01561 | Acute Toxicity, Mutagenicity, Skin and Eye Irritation, Multiple Dose Effects                    |
| A01562 | Mutagenicity, Reproductive Effects                                                              |
| A01563 | Acute Toxicity, Mutagenicity, Multiple Dose Effects                                             |

|        |                                                                                                       |
|--------|-------------------------------------------------------------------------------------------------------|
| A01564 | Acute Toxicity                                                                                        |
| A01565 | Acute Toxicity, Mutagenicity, Tumorigenicity, Skin and Eye Irritation,                                |
| A01566 | Acute Toxicity, Mutagenicity, Tumorigenicity, Reproductive Effects,                                   |
| A01567 | Acute Toxicity, Mutagenicity, Skin and Eye Irritation, Reproductive Effects                           |
| A01568 | Acute Toxicity, Mutagenicity, Tumorigenicity, Skin and Eye Irritation,                                |
| A01569 | Acute Toxicity, Mutagenicity, Tumorigenicity, Reproductive Effects,                                   |
| A01570 | Acute Toxicity, Tumorigenicity, Multiple Dose Effects                                                 |
| A01571 | Acute Toxicity, Skin and Eye Irritation                                                               |
| A01572 | Acute Toxicity, Mutagenicity, Tumorigenicity, Skin and Eye Irritation,                                |
| A01573 | Acute Toxicity, Mutagenicity, Tumorigenicity, Reproductive Effects,                                   |
| A01574 | Acute Toxicity, Mutagenicity, Tumorigenicity, Skin and Eye Irritation,                                |
| A01575 | Acute Toxicity, Mutagenicity, Tumorigenicity, Skin and Eye Irritation,                                |
| A01576 | Mutagenicity, Tumorigenicity, Skin and Eye Irritation, Reproductive Effects,<br>Multiple Dose Effects |
| A01577 | Acute Toxicity                                                                                        |
| A01578 | Acute Toxicity, Mutagenicity, Tumorigenicity, Skin and Eye Irritation,                                |
| A01579 | Acute Toxicity, Reproductive Effects, Multiple Dose Effects                                           |
| A01580 | Acute Toxicity                                                                                        |
| A01581 | Acute Toxicity                                                                                        |
| A01582 | Acute Toxicity, Mutagenicity, Tumorigenicity, Skin and Eye Irritation,                                |
| A01583 | Acute Toxicity, Mutagenicity, Tumorigenicity, Reproductive Effects,                                   |
| A01584 | Mutagenicity, Reproductive Effects                                                                    |
| A01585 | Acute Toxicity, Mutagenicity, Tumorigenicity, Skin and Eye Irritation,                                |
| A01586 | Acute Toxicity, Reproductive Effects, Multiple Dose Effects                                           |
| A01587 | Acute Toxicity, Mutagenicity, Reproductive Effects, Multiple Dose Effects                             |
| A01588 | Acute Toxicity, Mutagenicity                                                                          |
| A01589 | Acute Toxicity, Mutagenicity, Skin and Eye Irritation, Reproductive Effects,<br>Multiple Dose Effects |
| A01590 | Acute Toxicity, Mutagenicity, Tumorigenicity, Reproductive Effects,                                   |
| A01591 | Acute Toxicity, Mutagenicity, Multiple Dose Effects                                                   |
| A01592 | Acute Toxicity                                                                                        |
| A01593 | Acute Toxicity                                                                                        |
| A01594 | Acute Toxicity, Mutagenicity, Skin and Eye Irritation, Reproductive Effects,<br>Multiple Dose Effects |
| A01595 | Acute Toxicity, Mutagenicity, Tumorigenicity, Skin and Eye Irritation,                                |
| A01596 | Acute Toxicity, Mutagenicity, Tumorigenicity, Reproductive Effects,                                   |
| A01597 | Acute Toxicity                                                                                        |
| A01598 | Acute Toxicity, Tumorigenicity, Skin and Eye Irritation, Reproductive Effects                         |
| A01599 | Acute Toxicity, Mutagenicity                                                                          |
| A01600 | Acute Toxicity, Mutagenicity, Tumorigenicity, Multiple Dose Effects                                   |
| A01601 | Acute Toxicity, Mutagenicity, Tumorigenicity, Reproductive Effects,                                   |
| A01602 | Acute Toxicity, Mutagenicity, Skin and Eye Irritation, Reproductive Effects,<br>Multiple Dose Effects |
| A01603 | Acute Toxicity, Tumorigenicity, Multiple Dose Effects                                                 |
| A01604 | Acute Toxicity, Mutagenicity, Skin and Eye Irritation, Reproductive Effects,<br>Multiple Dose Effects |

|        |                                                                                                       |
|--------|-------------------------------------------------------------------------------------------------------|
| A01605 | Acute Toxicity, Mutagenicity, Reproductive Effects, Multiple Dose Effects                             |
| A01606 | Acute Toxicity, Mutagenicity, Tumorigenicity, Reproductive Effects                                    |
| A01607 | Acute Toxicity, Mutagenicity, Tumorigenicity, Reproductive Effects,                                   |
| A01608 | Acute Toxicity                                                                                        |
| A01609 | Acute Toxicity, Reproductive Effects                                                                  |
| A01610 | Acute Toxicity, Reproductive Effects                                                                  |
| A01611 | Acute Toxicity                                                                                        |
| A01612 | Mutagenicity, Tumorigenicity                                                                          |
| A01613 | Acute Toxicity                                                                                        |
| A01614 | Acute Toxicity, Reproductive Effects, Multiple Dose Effects                                           |
| A01615 | Acute Toxicity, Mutagenicity, Reproductive Effects                                                    |
| A01616 | Acute Toxicity, Mutagenicity                                                                          |
| A01617 | Acute Toxicity                                                                                        |
| A01618 | Acute Toxicity                                                                                        |
| A01619 | Acute Toxicity                                                                                        |
| A01620 | Acute Toxicity                                                                                        |
| A01621 | Acute Toxicity                                                                                        |
| A01622 | Acute Toxicity, Mutagenicity, Tumorigenicity, Reproductive Effects,                                   |
| A01623 | Acute Toxicity, Mutagenicity, Reproductive Effects                                                    |
| A01624 | Acute Toxicity                                                                                        |
| A01625 | Acute Toxicity, Mutagenicity, Skin and Eye Irritation, Multiple Dose Effects                          |
| A01626 | Acute Toxicity, Skin and Eye Irritation                                                               |
| A01627 | Acute Toxicity                                                                                        |
| A01628 | Acute Toxicity, Mutagenicity, Reproductive Effects, Multiple Dose Effects                             |
| A01629 | Acute Toxicity, Mutagenicity, Tumorigenicity, Skin and Eye Irritation,                                |
| A01630 | Acute Toxicity, Mutagenicity, Tumorigenicity, Reproductive Effects,                                   |
| A01631 | Acute Toxicity                                                                                        |
| A01632 | Acute Toxicity, Mutagenicity, Tumorigenicity, Reproductive Effects,                                   |
| A01633 | Acute Toxicity                                                                                        |
| A01634 | Acute Toxicity, Tumorigenicity, Reproductive Effects, Multiple Dose Effects                           |
| A01635 | Acute Toxicity, Mutagenicity, Tumorigenicity, Skin and Eye Irritation,                                |
| A01636 | Acute Toxicity, Mutagenicity                                                                          |
| A01637 | Mutagenicity                                                                                          |
| A01638 | Acute Toxicity, Mutagenicity                                                                          |
| A01639 | Acute Toxicity, Mutagenicity, Tumorigenicity, Reproductive Effects,                                   |
| A01640 | Acute Toxicity, Mutagenicity, Tumorigenicity, Reproductive Effects,                                   |
| A01641 | Acute Toxicity                                                                                        |
| A01642 | Acute Toxicity                                                                                        |
| A01643 | Acute Toxicity                                                                                        |
| A01644 | Acute Toxicity                                                                                        |
| A01645 | Acute Toxicity, Mutagenicity, Tumorigenicity, Skin and Eye Irritation,                                |
| A01646 | Acute Toxicity, Mutagenicity, Reproductive Effects                                                    |
| A01647 | Acute Toxicity, Mutagenicity, Skin and Eye Irritation, Reproductive Effects,<br>Multiple Dose Effects |
| A01648 | Acute Toxicity, Multiple Dose Effects                                                                 |
| A01649 | Acute Toxicity, Multiple Dose Effects                                                                 |

|        |                                                                                                    |
|--------|----------------------------------------------------------------------------------------------------|
| A01650 | Acute Toxicity, Mutagenicity                                                                       |
| A01651 | Mutagenicity                                                                                       |
| A01652 | Acute Toxicity                                                                                     |
| A01653 | Acute Toxicity, Multiple Dose Effects                                                              |
| A01654 | Acute Toxicity, Mutagenicity, Skin and Eye Irritation, Multiple Dose Effects                       |
| A01655 | Acute Toxicity                                                                                     |
| A01656 | Acute Toxicity, Mutagenicity                                                                       |
| A01657 | Acute Toxicity, Mutagenicity, Tumorigenicity                                                       |
| A01658 | Acute Toxicity                                                                                     |
| A01659 | Acute Toxicity, Mutagenicity                                                                       |
| A01660 | Acute Toxicity, Mutagenicity, Skin and Eye Irritation, Reproductive Effects, Multiple Dose Effects |
| A01661 | Acute Toxicity, Mutagenicity, Skin and Eye Irritation, Multiple Dose Effects                       |
| A01662 | Acute Toxicity                                                                                     |
| A01663 | Acute Toxicity                                                                                     |
| A01664 | Acute Toxicity, Mutagenicity, Tumorigenicity, Reproductive Effects,                                |
| A01665 | Acute Toxicity                                                                                     |
| A01666 | Acute Toxicity                                                                                     |
| A01667 | Acute Toxicity, Tumorigenicity, Multiple Dose Effects                                              |
| A01668 | Acute Toxicity, Mutagenicity, Tumorigenicity, Skin and Eye Irritation,                             |
| A01669 | Acute Toxicity, Mutagenicity, Reproductive Effects, Multiple Dose Effects                          |
| A01670 | Acute Toxicity, Mutagenicity, Tumorigenicity, Reproductive Effects,                                |
| A01671 | Acute Toxicity, Mutagenicity, Tumorigenicity, Skin and Eye Irritation,                             |
| A01672 | Skin and Eye Irritation, Reproductive Effects, Multiple Dose Effects                               |
| A01673 | Acute Toxicity, Tumorigenicity, Reproductive Effects, Multiple Dose Effects                        |
| A01674 | Acute Toxicity, Mutagenicity                                                                       |
| A01675 | Mutagenicity                                                                                       |
| A01676 | Acute Toxicity, Mutagenicity, Tumorigenicity, Skin and Eye Irritation,                             |
| A01677 | Acute Toxicity, Mutagenicity, Tumorigenicity, Reproductive Effects,                                |
| A01678 | Mutagenicity, Tumorigenicity, Reproductive Effects, Multiple Dose Effects                          |
| A01679 | Acute Toxicity, Reproductive Effects, Multiple Dose Effects                                        |
| A01680 | Acute Toxicity, Mutagenicity, Skin and Eye Irritation, Multiple Dose Effects                       |
| A01681 | Acute Toxicity, Mutagenicity, Tumorigenicity, Reproductive Effects,                                |
| A01682 | Acute Toxicity                                                                                     |
| A01683 | Acute Toxicity, Skin and Eye Irritation, Reproductive Effects, Multiple Dose                       |
| A01684 | Acute Toxicity                                                                                     |
| A01685 | Acute Toxicity, Mutagenicity, Skin and Eye Irritation                                              |
| A01686 | Acute Toxicity, Mutagenicity, Skin and Eye Irritation, Reproductive Effects, Multiple Dose Effects |
| A01687 | Acute Toxicity, Mutagenicity, Skin and Eye Irritation, Reproductive Effects                        |
| A01688 | Acute Toxicity                                                                                     |
| A01689 | Acute Toxicity, Mutagenicity, Skin and Eye Irritation, Multiple Dose Effects                       |
| A01690 | Acute Toxicity, Multiple Dose Effects                                                              |
| A01691 | Mutagenicity                                                                                       |
| A01692 | Mutagenicity                                                                                       |
| A01693 | Acute Toxicity                                                                                     |

|        |                                                                                                 |
|--------|-------------------------------------------------------------------------------------------------|
| A01694 | Acute Toxicity, Mutagenicity, Tumorigenicity, Multiple Dose Effects                             |
| A01695 | Acute Toxicity, Multiple Dose Effects                                                           |
| A01696 | Acute Toxicity, Multiple Dose Effects                                                           |
| A01697 | Multiple Dose Effects                                                                           |
| A01698 | Acute Toxicity                                                                                  |
| A01699 | Acute Toxicity, Mutagenicity, Reproductive Effects, Multiple Dose Effects                       |
| A01700 | Acute Toxicity                                                                                  |
| A01701 | Acute Toxicity, Reproductive Effects                                                            |
| A01702 | Non-toxicity                                                                                    |
| A01703 | Mutagenicity                                                                                    |
| A01704 | Acute Toxicity, Mutagenicity, Skin and Eye Irritation, Multiple Dose Effects                    |
| A01705 | Acute Toxicity, Mutagenicity, Tumorigenicity, Skin and Eye Irritation,                          |
| A01706 | Acute Toxicity, Mutagenicity, Tumorigenicity, Reproductive Effects,                             |
| A01707 | Acute Toxicity                                                                                  |
| A01708 | Acute Toxicity, Mutagenicity, Multiple Dose Effects                                             |
| A01709 | Acute Toxicity, Mutagenicity                                                                    |
| A01710 | Acute Toxicity, Mutagenicity, Tumorigenicity, Reproductive Effects,                             |
| A01711 | Acute Toxicity, Reproductive Effects, Multiple Dose Effects                                     |
| A01712 | Acute Toxicity, Mutagenicity, Tumorigenicity, Skin and Eye Irritation,<br>Multiple Dose Effects |
| A01713 | Acute Toxicity, Mutagenicity, Tumorigenicity, Multiple Dose Effects                             |
| A01714 | Acute Toxicity, Mutagenicity, Tumorigenicity, Reproductive Effects,                             |
| A01715 | Acute Toxicity, Mutagenicity, Tumorigenicity, Reproductive Effects,                             |
| A01716 | Acute Toxicity, Mutagenicity, Skin and Eye Irritation                                           |
| A01717 | Acute Toxicity, Mutagenicity, Reproductive Effects                                              |
| A01718 | Acute Toxicity, Mutagenicity, Tumorigenicity, Reproductive Effects,                             |
| A01719 | Acute Toxicity, Mutagenicity, Tumorigenicity, Multiple Dose Effects                             |
| A01720 | Acute Toxicity, Mutagenicity                                                                    |
| A01721 | Acute Toxicity                                                                                  |
| A01722 | Acute Toxicity, Mutagenicity                                                                    |
| A01723 | Acute Toxicity, Mutagenicity, Tumorigenicity, Skin and Eye Irritation,                          |
| A01724 | Acute Toxicity, Multiple Dose Effects                                                           |
| A01725 | Acute Toxicity, Mutagenicity, Tumorigenicity, Reproductive Effects,                             |
| A01726 | Acute Toxicity                                                                                  |
| A01727 | Acute Toxicity                                                                                  |
| A01728 | Acute Toxicity, Mutagenicity, Tumorigenicity, Reproductive Effects,                             |
| A01729 | Acute Toxicity, Mutagenicity, Tumorigenicity, Skin and Eye Irritation,                          |
| A01730 | Acute Toxicity, Mutagenicity, Skin and Eye Irritation, Multiple Dose Effects                    |
| A01731 | Acute Toxicity, Mutagenicity, Tumorigenicity, Multiple Dose Effects                             |
| A01732 | Acute Toxicity, Mutagenicity, Multiple Dose Effects                                             |
| A01733 | Acute Toxicity                                                                                  |
| A01734 | Acute Toxicity, Mutagenicity, Multiple Dose Effects                                             |
| A01735 | Acute Toxicity, Reproductive Effects, Multiple Dose Effects                                     |
| A01736 | Acute Toxicity, Mutagenicity, Tumorigenicity, Skin and Eye Irritation,                          |
| A01737 | Acute Toxicity, Mutagenicity, Tumorigenicity, Reproductive Effects,                             |
| A01738 | Acute Toxicity, Mutagenicity, Tumorigenicity, Multiple Dose Effects                             |



|        |                                                                                                 |
|--------|-------------------------------------------------------------------------------------------------|
| A01739 | Acute Toxicity, Mutagenicity                                                                    |
| A01740 | Acute Toxicity, Mutagenicity, Skin and Eye Irritation                                           |
| A01741 | Acute Toxicity, Mutagenicity, Tumorigenicity, Skin and Eye Irritation,                          |
| A01742 | Acute Toxicity, Skin and Eye Irritation                                                         |
| A01743 | Acute Toxicity, Mutagenicity, Tumorigenicity, Skin and Eye Irritation,                          |
| A01744 | Acute Toxicity, Reproductive Effects, Multiple Dose Effects                                     |
| A01745 | Acute Toxicity, Mutagenicity                                                                    |
| A01746 | Acute Toxicity, Mutagenicity, Tumorigenicity, Reproductive Effects,                             |
| A01747 | Mutagenicity                                                                                    |
| A01748 | Acute Toxicity, Mutagenicity                                                                    |
| A01749 | Acute Toxicity, Mutagenicity, Tumorigenicity, Skin and Eye Irritation,                          |
| A01750 | Acute Toxicity, Mutagenicity, Reproductive Effects, Multiple Dose Effects                       |
| A01751 | Acute Toxicity, Mutagenicity, Tumorigenicity, Reproductive Effects,                             |
| A01752 | Acute Toxicity                                                                                  |
| A01753 | Acute Toxicity, Mutagenicity, Multiple Dose Effects                                             |
| A01754 | Acute Toxicity, Tumorigenicity                                                                  |
| A01755 | Acute Toxicity, Mutagenicity, Skin and Eye Irritation                                           |
| A01756 | Acute Toxicity                                                                                  |
| A01757 | Acute Toxicity, Mutagenicity, Tumorigenicity, Reproductive Effects,                             |
| A01758 | Acute Toxicity, Mutagenicity, Tumorigenicity, Reproductive Effects,                             |
| A01759 | Acute Toxicity, Mutagenicity                                                                    |
| A01760 | Acute Toxicity, Mutagenicity, Multiple Dose Effects                                             |
| A01761 | Acute Toxicity, Mutagenicity, Tumorigenicity, Multiple Dose Effects                             |
| A01762 | Acute Toxicity, Reproductive Effects, Multiple Dose Effects                                     |
| A01763 | Acute Toxicity, Multiple Dose Effects                                                           |
| A01764 | Acute Toxicity, Mutagenicity, Tumorigenicity, Reproductive Effects,                             |
| A01765 | Acute Toxicity, Mutagenicity                                                                    |
| A01766 | Acute Toxicity, Mutagenicity, Tumorigenicity, Multiple Dose Effects                             |
| A01767 | Acute Toxicity, Mutagenicity, Tumorigenicity, Multiple Dose Effects                             |
| A01768 | Acute Toxicity, Mutagenicity, Tumorigenicity, Skin and Eye Irritation                           |
| A01769 | Acute Toxicity, Mutagenicity, Tumorigenicity, Skin and Eye Irritation,                          |
| A01770 | Acute Toxicity                                                                                  |
| A01771 | Acute Toxicity                                                                                  |
| A01772 | Acute Toxicity, Mutagenicity                                                                    |
| A01773 | Acute Toxicity                                                                                  |
| A01774 | Acute Toxicity, Mutagenicity, Multiple Dose Effects                                             |
| A01775 | Acute Toxicity, Mutagenicity, Tumorigenicity, Skin and Eye Irritation,                          |
| A01776 | Acute Toxicity, Skin and Eye Irritation, Multiple Dose Effects                                  |
| A01777 | Acute Toxicity, Mutagenicity, Reproductive Effects, Multiple Dose Effects                       |
| A01778 | Acute Toxicity, Mutagenicity, Tumorigenicity, Skin and Eye Irritation,<br>Multiple Dose Effects |
| A01779 | Acute Toxicity, Mutagenicity, Tumorigenicity, Multiple Dose Effects                             |
| A01780 | Acute Toxicity                                                                                  |
| A01781 | Acute Toxicity, Mutagenicity, Skin and Eye Irritation, Multiple Dose Effects                    |
| A01782 | Acute Toxicity, Mutagenicity                                                                    |
| A01783 | Acute Toxicity                                                                                  |

|        |                                                                                                      |
|--------|------------------------------------------------------------------------------------------------------|
| A01784 | Mutagenicity                                                                                         |
| A01785 | Acute Toxicity, Skin and Eye Irritation, Multiple Dose Effects                                       |
| A01786 | Acute Toxicity, Mutagenicity, Multiple Dose Effects                                                  |
| A01787 | Acute Toxicity, Mutagenicity, Multiple Dose Effects                                                  |
| A01788 | Acute Toxicity, Tumorigenicity, Multiple Dose Effects                                                |
| A01789 | Acute Toxicity, Mutagenicity, Skin and Eye Irritation, Reproductive Effects, Multiple Dose Effects   |
| A01790 | Acute Toxicity, Mutagenicity, Skin and Eye Irritation, Reproductive Effects, Multiple Dose Effects   |
| A01791 | Acute Toxicity                                                                                       |
| A01792 | Acute Toxicity, Tumorigenicity, Multiple Dose Effects                                                |
| A01793 | Acute Toxicity, Mutagenicity                                                                         |
| A01794 | Acute Toxicity, Mutagenicity, Tumorigenicity, Multiple Dose Effects                                  |
| A01795 | Acute Toxicity, Mutagenicity                                                                         |
| A01796 | Acute Toxicity, Mutagenicity, Tumorigenicity, Skin and Eye Irritation,                               |
| A01797 | Acute Toxicity, Mutagenicity, Reproductive Effects, Multiple Dose Effects                            |
| A01798 | Acute Toxicity, Mutagenicity, Tumorigenicity, Multiple Dose Effects                                  |
| A01799 | Acute Toxicity, Skin and Eye Irritation                                                              |
| A01800 | Acute Toxicity, Multiple Dose Effects                                                                |
| A01801 | Acute Toxicity, Skin and Eye Irritation, Multiple Dose Effects                                       |
| A01802 | Acute Toxicity, Tumorigenicity, Skin and Eye Irritation, Reproductive Effects, Multiple Dose Effects |
| A01803 | Acute Toxicity, Mutagenicity                                                                         |
| A01804 | Acute Toxicity                                                                                       |
| A01805 | Acute Toxicity, Multiple Dose Effects                                                                |
| A01806 | Acute Toxicity, Skin and Eye Irritation, Multiple Dose Effects                                       |
| A01807 | Tumorigenicity                                                                                       |
| A01808 | Acute Toxicity                                                                                       |
| A01809 | Acute Toxicity, Mutagenicity, Tumorigenicity, Skin and Eye Irritation,                               |
| A01810 | Acute Toxicity                                                                                       |
| A01811 | Acute Toxicity, Mutagenicity, Reproductive Effects, Multiple Dose Effects                            |
| A01812 | Mutagenicity                                                                                         |
| A01813 | Acute Toxicity, Mutagenicity, Multiple Dose Effects                                                  |
| A01814 | Acute Toxicity                                                                                       |
| A01815 | Acute Toxicity                                                                                       |
| A01816 | Acute Toxicity                                                                                       |
| A01817 | Acute Toxicity                                                                                       |
| A01818 | Acute Toxicity                                                                                       |
| A01819 | Acute Toxicity, Tumorigenicity                                                                       |
| A01820 | Acute Toxicity                                                                                       |
| A01821 | Acute Toxicity, Mutagenicity, Tumorigenicity, Multiple Dose Effects                                  |
| A01822 | Acute Toxicity, Reproductive Effects, Multiple Dose Effects                                          |
| A01823 | Acute Toxicity                                                                                       |
| A01824 | Acute Toxicity                                                                                       |
| A01825 | Acute Toxicity, Reproductive Effects                                                                 |
| A01826 | Acute Toxicity                                                                                       |

|        |                                                                                                       |
|--------|-------------------------------------------------------------------------------------------------------|
| A01827 | Acute Toxicity, Reproductive Effects, Multiple Dose Effects                                           |
| A01828 | Acute Toxicity, Mutagenicity, Tumorigenicity                                                          |
| A01829 | Acute Toxicity, Mutagenicity, Tumorigenicity, Skin and Eye Irritation,                                |
| A01830 | Acute Toxicity, Multiple Dose Effects                                                                 |
| A01831 | Acute Toxicity                                                                                        |
| A01832 | Acute Toxicity, Mutagenicity, Tumorigenicity                                                          |
| A01833 | Acute Toxicity                                                                                        |
| A01834 | Acute Toxicity, Mutagenicity                                                                          |
| A01835 | Acute Toxicity, Reproductive Effects, Multiple Dose Effects                                           |
| A01836 | Acute Toxicity                                                                                        |
| A01837 | Acute Toxicity                                                                                        |
| A01838 | Acute Toxicity, Mutagenicity, Skin and Eye Irritation                                                 |
| A01839 | Acute Toxicity, Mutagenicity, Tumorigenicity, Skin and Eye Irritation,                                |
| A01840 | Acute Toxicity, Mutagenicity, Tumorigenicity, Skin and Eye Irritation,<br>Multiple Dose Effects       |
| A01841 | Acute Toxicity, Mutagenicity, Multiple Dose Effects                                                   |
| A01842 | Acute Toxicity, Mutagenicity, Tumorigenicity, Multiple Dose Effects                                   |
| A01843 | Acute Toxicity, Mutagenicity                                                                          |
| A01844 | Acute Toxicity, Skin and Eye Irritation, Reproductive Effects, Multiple Dose                          |
| A01845 | Acute Toxicity, Multiple Dose Effects                                                                 |
| A01846 | Acute Toxicity, Mutagenicity, Reproductive Effects, Multiple Dose Effects                             |
| A01847 | Acute Toxicity, Multiple Dose Effects                                                                 |
| A01848 | Acute Toxicity, Multiple Dose Effects                                                                 |
| A01849 | Acute Toxicity, Multiple Dose Effects                                                                 |
| A01850 | Acute Toxicity, Reproductive Effects                                                                  |
| A01851 | Acute Toxicity, Mutagenicity, Tumorigenicity, Reproductive Effects,                                   |
| A01852 | Acute Toxicity                                                                                        |
| A01853 | Acute Toxicity, Skin and Eye Irritation                                                               |
| A01854 | Acute Toxicity                                                                                        |
| A01855 | Acute Toxicity, Mutagenicity, Reproductive Effects, Multiple Dose Effects                             |
| A01856 | Skin and Eye Irritation, Multiple Dose Effects                                                        |
| A01857 | Acute Toxicity, Mutagenicity, Tumorigenicity, Multiple Dose Effects                                   |
| A01858 | Acute Toxicity, Mutagenicity, Multiple Dose Effects                                                   |
| A01859 | Acute Toxicity, Mutagenicity, Skin and Eye Irritation, Reproductive Effects,<br>Multiple Dose Effects |
| A01860 | Acute Toxicity, Reproductive Effects                                                                  |
| A01861 | Acute Toxicity, Mutagenicity, Tumorigenicity, Skin and Eye Irritation,<br>Multiple Dose Effects       |
| A01862 | Acute Toxicity, Mutagenicity, Multiple Dose Effects                                                   |
| A01863 | Acute Toxicity                                                                                        |
| A01864 | Acute Toxicity, Mutagenicity, Skin and Eye Irritation, Reproductive Effects,<br>Multiple Dose Effects |
| A01865 | Acute Toxicity                                                                                        |
| A01866 | Acute Toxicity, Mutagenicity                                                                          |
| A01867 | Acute Toxicity, Mutagenicity, Tumorigenicity, Skin and Eye Irritation,                                |
| A01868 | Acute Toxicity, Mutagenicity                                                                          |

|        |                                                                                                       |
|--------|-------------------------------------------------------------------------------------------------------|
| A01869 | Acute Toxicity, Skin and Eye Irritation                                                               |
| A01870 | Acute Toxicity, Mutagenicity, Tumorigenicity, Skin and Eye Irritation,                                |
| A01871 | Acute Toxicity, Multiple Dose Effects                                                                 |
| A01872 | Acute Toxicity, Mutagenicity                                                                          |
| A01873 | Mutagenicity, Tumorigenicity                                                                          |
| A01874 | Acute Toxicity, Mutagenicity, Tumorigenicity                                                          |
| A01875 | Acute Toxicity, Mutagenicity, Multiple Dose Effects                                                   |
| A01876 | Acute Toxicity, Mutagenicity, Tumorigenicity, Reproductive Effects,                                   |
| A01877 | Acute Toxicity, Mutagenicity                                                                          |
| A01878 | Acute Toxicity, Skin and Eye Irritation                                                               |
| A01879 | Acute Toxicity, Mutagenicity, Tumorigenicity, Reproductive Effects,                                   |
| A01880 | Acute Toxicity, Mutagenicity, Tumorigenicity, Skin and Eye Irritation,                                |
| A01881 | Acute Toxicity, Mutagenicity, Skin and Eye Irritation                                                 |
| A01882 | Acute Toxicity, Tumorigenicity                                                                        |
| A01883 | Acute Toxicity, Mutagenicity, Tumorigenicity, Skin and Eye Irritation,                                |
| A01884 | Acute Toxicity, Mutagenicity, Skin and Eye Irritation, Multiple Dose Effects                          |
| A01885 | Acute Toxicity, Mutagenicity, Skin and Eye Irritation, Multiple Dose Effects                          |
| A01886 | Acute Toxicity, Mutagenicity, Skin and Eye Irritation                                                 |
| A01887 | Acute Toxicity, Skin and Eye Irritation, Reproductive Effects, Multiple Dose                          |
| A01888 | Acute Toxicity, Mutagenicity, Skin and Eye Irritation, Reproductive Effects,<br>Multiple Dose Effects |
| A01889 | Acute Toxicity, Mutagenicity, Skin and Eye Irritation, Multiple Dose Effects                          |
| A01890 | Acute Toxicity, Mutagenicity, Multiple Dose Effects                                                   |
| A01891 | Acute Toxicity, Mutagenicity                                                                          |
| A01892 | Acute Toxicity, Skin and Eye Irritation                                                               |
| A01893 | Acute Toxicity, Mutagenicity, Tumorigenicity, Skin and Eye Irritation,<br>Multiple Dose Effects       |
| A01894 | Acute Toxicity, Mutagenicity, Tumorigenicity, Skin and Eye Irritation,                                |
| A01895 | Mutagenicity                                                                                          |
| A01896 | Acute Toxicity, Mutagenicity, Skin and Eye Irritation, Multiple Dose Effects                          |
| A01897 | Acute Toxicity                                                                                        |
| A01898 | Acute Toxicity, Mutagenicity, Tumorigenicity, Skin and Eye Irritation,                                |
| A01899 | Acute Toxicity, Mutagenicity, Skin and Eye Irritation, Multiple Dose Effects                          |
| A01900 | Acute Toxicity, Mutagenicity, Tumorigenicity, Skin and Eye Irritation,                                |
| A01901 | Acute Toxicity, Mutagenicity, Reproductive Effects, Multiple Dose Effects                             |
| A01902 | Acute Toxicity, Mutagenicity, Skin and Eye Irritation, Multiple Dose Effects                          |
| A01903 | Acute Toxicity, Mutagenicity, Tumorigenicity, Skin and Eye Irritation,<br>Multiple Dose Effects       |
| A01904 | Acute Toxicity, Multiple Dose Effects                                                                 |
| A01905 | Acute Toxicity, Mutagenicity, Multiple Dose Effects                                                   |
| A01906 | Acute Toxicity, Mutagenicity, Tumorigenicity, Skin and Eye Irritation,<br>Multiple Dose Effects       |
| A01907 | Mutagenicity, Multiple Dose Effects                                                                   |
| A01908 | Acute Toxicity, Skin and Eye Irritation                                                               |
| A01909 | Acute Toxicity, Mutagenicity, Tumorigenicity, Skin and Eye Irritation,                                |
| A01910 | Acute Toxicity, Multiple Dose Effects                                                                 |

|        |                                                                                                      |
|--------|------------------------------------------------------------------------------------------------------|
| A01911 | Acute Toxicity, Mutagenicity, Tumorigenicity, Skin and Eye Irritation, Multiple Dose Effects         |
| A01912 | Acute Toxicity, Multiple Dose Effects                                                                |
| A01913 | Acute Toxicity, Tumorigenicity, Skin and Eye Irritation, Reproductive Effects, Multiple Dose Effects |
| A01914 | Acute Toxicity, Mutagenicity, Tumorigenicity, Skin and Eye Irritation,                               |
| A01915 | Acute Toxicity, Mutagenicity, Tumorigenicity                                                         |
| A01916 | Acute Toxicity, Reproductive Effects                                                                 |
| A01917 | Acute Toxicity                                                                                       |
| A01918 | Mutagenicity, Reproductive Effects                                                                   |
| A01919 | Acute Toxicity, Reproductive Effects, Multiple Dose Effects                                          |
| A01920 | Acute Toxicity, Reproductive Effects, Multiple Dose Effects                                          |
| A01921 | Acute Toxicity                                                                                       |
| A01922 | Acute Toxicity                                                                                       |
| A01923 | Acute Toxicity, Mutagenicity, Skin and Eye Irritation, Reproductive Effects, Multiple Dose Effects   |
| A01924 | Acute Toxicity, Skin and Eye Irritation, Multiple Dose Effects                                       |
| A01925 | Acute Toxicity, Mutagenicity                                                                         |
| A01926 | Acute Toxicity, Mutagenicity, Tumorigenicity, Skin and Eye Irritation,                               |
| A01927 | Acute Toxicity                                                                                       |
| A01928 | Acute Toxicity, Tumorigenicity, Multiple Dose Effects                                                |
| A01929 | Acute Toxicity, Mutagenicity, Multiple Dose Effects                                                  |
| A01930 | Acute Toxicity, Mutagenicity, Tumorigenicity                                                         |
| A01931 | Acute Toxicity, Mutagenicity, Tumorigenicity, Skin and Eye Irritation, Multiple Dose Effects         |
| A01932 | Acute Toxicity, Mutagenicity, Multiple Dose Effects                                                  |
| A01933 | Acute Toxicity, Tumorigenicity, Multiple Dose Effects                                                |
| A01934 | Acute Toxicity, Skin and Eye Irritation                                                              |
| A01935 | Acute Toxicity, Mutagenicity, Tumorigenicity                                                         |
| A01936 | Acute Toxicity, Mutagenicity, Multiple Dose Effects                                                  |
| A01937 | Acute Toxicity, Mutagenicity, Skin and Eye Irritation, Multiple Dose Effects                         |
| A01938 | Mutagenicity, Tumorigenicity                                                                         |
| A01939 | Acute Toxicity, Mutagenicity, Tumorigenicity, Skin and Eye Irritation                                |
| A01940 | Acute Toxicity, Mutagenicity, Skin and Eye Irritation, Multiple Dose Effects                         |
| A01941 | Acute Toxicity, Mutagenicity, Tumorigenicity, Skin and Eye Irritation,                               |
| A01942 | Acute Toxicity, Mutagenicity, Skin and Eye Irritation, Multiple Dose Effects                         |
| A01943 | Acute Toxicity, Mutagenicity                                                                         |
| A01944 | Acute Toxicity, Skin and Eye Irritation                                                              |
| A01945 | Non-toxicity                                                                                         |
| A01946 | Acute Toxicity                                                                                       |
| A01947 | Acute Toxicity, Mutagenicity, Skin and Eye Irritation, Reproductive Effects, Multiple Dose Effects   |
| A01948 | Acute Toxicity, Mutagenicity, Tumorigenicity, Skin and Eye Irritation                                |
| A01949 | Acute Toxicity, Mutagenicity                                                                         |
| A01950 | Acute Toxicity, Multiple Dose Effects                                                                |
| A01951 | Acute Toxicity                                                                                       |

|        |                                                                                                 |
|--------|-------------------------------------------------------------------------------------------------|
| A01952 | Acute Toxicity, Mutagenicity, Tumorigenicity                                                    |
| A01953 | Mutagenicity, Tumorigenicity, Skin and Eye Irritation, Multiple Dose Effects                    |
| A01954 | Acute Toxicity, Mutagenicity, Tumorigenicity, Skin and Eye Irritation                           |
| A01955 | Acute Toxicity, Mutagenicity, Skin and Eye Irritation                                           |
| A01956 | Acute Toxicity, Mutagenicity, Skin and Eye Irritation, Multiple Dose Effects                    |
| A01957 | Acute Toxicity                                                                                  |
| A01958 | Acute Toxicity                                                                                  |
| A01959 | Acute Toxicity, Mutagenicity, Tumorigenicity, Reproductive Effects,                             |
| A01960 | Acute Toxicity, Skin and Eye Irritation, Multiple Dose Effects                                  |
| A01961 | Acute Toxicity, Mutagenicity, Skin and Eye Irritation, Multiple Dose Effects                    |
| A01962 | Mutagenicity, Tumorigenicity                                                                    |
| A01963 | Acute Toxicity, Mutagenicity, Skin and Eye Irritation                                           |
| A01964 | Acute Toxicity                                                                                  |
| A01965 | Skin and Eye Irritation                                                                         |
| A01966 | Acute Toxicity, Skin and Eye Irritation, Multiple Dose Effects                                  |
| A01967 | Acute Toxicity, Mutagenicity, Tumorigenicity, Skin and Eye Irritation,<br>Multiple Dose Effects |
| A01968 | Skin and Eye Irritation                                                                         |
| A01969 | Acute Toxicity                                                                                  |
| A01970 | Acute Toxicity                                                                                  |
| A01971 | Acute Toxicity, Multiple Dose Effects                                                           |
| A01972 | Acute Toxicity, Mutagenicity, Tumorigenicity, Reproductive Effects,                             |
| A01973 | Mutagenicity                                                                                    |
| A01974 | Acute Toxicity, Mutagenicity                                                                    |
| A01975 | Acute Toxicity, Mutagenicity                                                                    |
| A01976 | Acute Toxicity, Reproductive Effects                                                            |
| A01977 | Reproductive Effects                                                                            |
| A01978 | Acute Toxicity, Mutagenicity, Reproductive Effects, Multiple Dose Effects                       |
| A01979 | Acute Toxicity, Mutagenicity, Tumorigenicity, Skin and Eye Irritation,                          |
| A01980 | Acute Toxicity, Mutagenicity, Multiple Dose Effects                                             |
| A01981 | Acute Toxicity                                                                                  |
| A01982 | Acute Toxicity, Mutagenicity, Multiple Dose Effects                                             |
| A01983 | Acute Toxicity, Mutagenicity                                                                    |
| A01984 | Mutagenicity                                                                                    |
| A01985 | Acute Toxicity, Mutagenicity                                                                    |
| A01986 | Mutagenicity                                                                                    |
| A01987 | Acute Toxicity                                                                                  |
| A01988 | Acute Toxicity, Skin and Eye Irritation, Multiple Dose Effects                                  |
| A01989 | Acute Toxicity                                                                                  |
| A01990 | Mutagenicity                                                                                    |
| A01991 | Acute Toxicity, Tumorigenicity                                                                  |
| A01992 | Acute Toxicity, Skin and Eye Irritation                                                         |
| A01993 | Acute Toxicity, Mutagenicity, Skin and Eye Irritation, Multiple Dose Effects                    |
| A01994 | Acute Toxicity                                                                                  |
| A01995 | Acute Toxicity, Mutagenicity, Tumorigenicity, Skin and Eye Irritation,                          |
| A01996 | Non-toxicity                                                                                    |

|        |                                                                                                    |
|--------|----------------------------------------------------------------------------------------------------|
| A01997 | Mutagenicity                                                                                       |
| A01998 | Acute Toxicity                                                                                     |
| A01999 | Acute Toxicity                                                                                     |
| A02000 | Acute Toxicity, Mutagenicity, Tumorigenicity                                                       |
| A02001 | Acute Toxicity, Mutagenicity, Multiple Dose Effects                                                |
| A02002 | Acute Toxicity, Mutagenicity, Multiple Dose Effects                                                |
| A02003 | Acute Toxicity, Reproductive Effects                                                               |
| A02004 | Acute Toxicity                                                                                     |
| A02005 | Mutagenicity                                                                                       |
| A02006 | Acute Toxicity, Mutagenicity                                                                       |
| A02007 | Acute Toxicity, Mutagenicity                                                                       |
| A02008 | Acute Toxicity, Mutagenicity, Reproductive Effects, Multiple Dose Effects                          |
| A02009 | Acute Toxicity, Multiple Dose Effects                                                              |
| A02010 | Acute Toxicity, Mutagenicity, Tumorigenicity, Skin and Eye Irritation, Multiple Dose Effects       |
| A02011 | Acute Toxicity, Mutagenicity, Tumorigenicity, Skin and Eye Irritation,                             |
| A02012 | Acute Toxicity, Mutagenicity, Reproductive Effects, Multiple Dose Effects                          |
| A02013 | Acute Toxicity                                                                                     |
| A02014 | Acute Toxicity, Mutagenicity, Skin and Eye Irritation, Reproductive Effects, Multiple Dose Effects |
| A02015 | Acute Toxicity                                                                                     |
| A02016 | Acute Toxicity, Skin and Eye Irritation                                                            |
| A02017 | Acute Toxicity, Mutagenicity                                                                       |
| A02018 | Acute Toxicity, Mutagenicity                                                                       |
| A02019 | Acute Toxicity, Multiple Dose Effects                                                              |
| A02020 | Acute Toxicity, Mutagenicity, Skin and Eye Irritation, Reproductive Effects, Multiple Dose Effects |
| A02021 | Mutagenicity, Tumorigenicity                                                                       |
| A02022 | Acute Toxicity, Mutagenicity                                                                       |
| A02023 | Acute Toxicity                                                                                     |
| A02024 | Acute Toxicity                                                                                     |
| A02025 | Mutagenicity, Reproductive Effects                                                                 |
| A02026 | Acute Toxicity, Reproductive Effects                                                               |
| A02027 | Acute Toxicity, Skin and Eye Irritation                                                            |
| A02028 | Acute Toxicity, Mutagenicity, Tumorigenicity, Skin and Eye Irritation,                             |
| A02029 | Acute Toxicity                                                                                     |
| A02030 | Acute Toxicity, Mutagenicity, Reproductive Effects, Multiple Dose Effects                          |
| A02031 | Acute Toxicity, Mutagenicity, Skin and Eye Irritation, Reproductive Effects                        |
| A02032 | Mutagenicity                                                                                       |
| A02033 | Acute Toxicity, Mutagenicity, Multiple Dose Effects                                                |
| A02034 | Acute Toxicity, Mutagenicity, Multiple Dose Effects                                                |
| A02035 | Acute Toxicity, Mutagenicity, Multiple Dose Effects                                                |
| A02036 | Acute Toxicity, Mutagenicity, Skin and Eye Irritation                                              |
| A02037 | Mutagenicity, Tumorigenicity                                                                       |
| A02038 | Acute Toxicity, Tumorigenicity                                                                     |

|        |                                                                                                    |
|--------|----------------------------------------------------------------------------------------------------|
| A02039 | Acute Toxicity, Mutagenicity, Tumorigenicity, Skin and Eye Irritation, Multiple Dose Effects       |
| A02040 | Acute Toxicity, Mutagenicity, Reproductive Effects, Multiple Dose Effects                          |
| A02041 | Acute Toxicity                                                                                     |
| A02042 | Acute Toxicity                                                                                     |
| A02043 | Mutagenicity                                                                                       |
| A02044 | Acute Toxicity                                                                                     |
| A02045 | Acute Toxicity, Mutagenicity                                                                       |
| A02046 | Acute Toxicity, Mutagenicity, Tumorigenicity                                                       |
| A02047 | Tumorigenicity                                                                                     |
| A02048 | Acute Toxicity, Mutagenicity                                                                       |
| A02049 | Acute Toxicity, Mutagenicity, Tumorigenicity, Multiple Dose Effects                                |
| A02050 | Mutagenicity                                                                                       |
| A02051 | Acute Toxicity                                                                                     |
| A02052 | Acute Toxicity                                                                                     |
| A02053 | Acute Toxicity, Tumorigenicity                                                                     |
| A02054 | Acute Toxicity, Mutagenicity, Tumorigenicity, Skin and Eye Irritation, Multiple Dose Effects       |
| A02055 | Acute Toxicity, Mutagenicity                                                                       |
| A02056 | Acute Toxicity                                                                                     |
| A02057 | Acute Toxicity, Mutagenicity, Skin and Eye Irritation                                              |
| A02058 | Acute Toxicity, Mutagenicity, Skin and Eye Irritation                                              |
| A02059 | Acute Toxicity, Mutagenicity                                                                       |
| A02060 | Acute Toxicity, Skin and Eye Irritation                                                            |
| A02061 | Acute Toxicity                                                                                     |
| A02062 | Acute Toxicity, Reproductive Effects, Multiple Dose Effects                                        |
| A02063 | Acute Toxicity, Mutagenicity, Skin and Eye Irritation                                              |
| A02064 | Acute Toxicity, Mutagenicity, Skin and Eye Irritation, Reproductive Effects, Multiple Dose Effects |
| A02065 | Acute Toxicity, Tumorigenicity                                                                     |
| A02066 | Acute Toxicity                                                                                     |
| A02067 | Acute Toxicity, Skin and Eye Irritation, Multiple Dose Effects                                     |
| A02068 | Acute Toxicity, Multiple Dose Effects                                                              |
| A02069 | Acute Toxicity, Mutagenicity                                                                       |
| A02070 | Acute Toxicity, Mutagenicity                                                                       |
| A02071 | Acute Toxicity, Mutagenicity, Reproductive Effects, Multiple Dose Effects                          |
| A02072 | Acute Toxicity, Mutagenicity, Tumorigenicity, Multiple Dose Effects                                |
| A02073 | Acute Toxicity, Mutagenicity                                                                       |
| A02074 | Acute Toxicity, Mutagenicity, Skin and Eye Irritation                                              |
| A02075 | Acute Toxicity, Mutagenicity, Tumorigenicity, Skin and Eye Irritation,                             |
| A02076 | Acute Toxicity                                                                                     |
| A02077 | Acute Toxicity, Mutagenicity, Multiple Dose Effects                                                |
| A02078 | Mutagenicity, Multiple Dose Effects                                                                |
| A02079 | Acute Toxicity, Mutagenicity, Tumorigenicity, Multiple Dose Effects                                |
| A02080 | Acute Toxicity, Tumorigenicity                                                                     |
| A02081 | Acute Toxicity, Mutagenicity, Skin and Eye Irritation                                              |



|        |                                                                                              |
|--------|----------------------------------------------------------------------------------------------|
| A02082 | Acute Toxicity, Mutagenicity, Tumorigenicity, Skin and Eye Irritation, Multiple Dose Effects |
| A02083 | Acute Toxicity, Mutagenicity, Tumorigenicity, Skin and Eye Irritation,                       |
| A02084 | Acute Toxicity                                                                               |
| A02085 | Acute Toxicity, Tumorigenicity, Skin and Eye Irritation, Multiple Dose                       |
| A02086 | Acute Toxicity, Tumorigenicity, Skin and Eye Irritation, Multiple Dose                       |
| A02087 | Acute Toxicity                                                                               |
| A02088 | Acute Toxicity, Mutagenicity                                                                 |
| A02089 | Acute Toxicity                                                                               |
| A02090 | Acute Toxicity, Mutagenicity                                                                 |
| A02091 | Mutagenicity                                                                                 |
| A02092 | Acute Toxicity, Tumorigenicity, Skin and Eye Irritation, Multiple Dose                       |
| A02093 | Acute Toxicity, Mutagenicity, Tumorigenicity, Skin and Eye Irritation,                       |
| A02094 | Mutagenicity                                                                                 |
| A02095 | Acute Toxicity, Tumorigenicity, Reproductive Effects, Multiple Dose Effects                  |
| A02096 | Acute Toxicity, Mutagenicity, Tumorigenicity, Multiple Dose Effects                          |
| A02097 | Acute Toxicity, Skin and Eye Irritation, Multiple Dose Effects                               |
| A02098 | Acute Toxicity                                                                               |
| A02099 | Tumorigenicity                                                                               |
| A02100 | Acute Toxicity, Mutagenicity, Skin and Eye Irritation                                        |
| A02101 | Mutagenicity                                                                                 |
| A02102 | Acute Toxicity                                                                               |
| A02103 | Acute Toxicity                                                                               |
| A02104 | Acute Toxicity                                                                               |
| A02105 | Acute Toxicity                                                                               |
| A02106 | Acute Toxicity                                                                               |
| A02107 | Acute Toxicity, Mutagenicity                                                                 |
| A02108 | Acute Toxicity, Mutagenicity, Tumorigenicity, Reproductive Effects,                          |
| A02109 | Acute Toxicity, Mutagenicity, Tumorigenicity, Reproductive Effects,                          |
| A02110 | Acute Toxicity, Mutagenicity, Reproductive Effects, Multiple Dose Effects                    |
| A02111 | Acute Toxicity, Mutagenicity                                                                 |
| A02112 | Acute Toxicity, Mutagenicity                                                                 |
| A02113 | Acute Toxicity, Skin and Eye Irritation                                                      |
| A02114 | Acute Toxicity, Mutagenicity, Tumorigenicity, Skin and Eye Irritation,                       |
| A02115 | Acute Toxicity                                                                               |
| A02116 | Acute Toxicity, Mutagenicity, Skin and Eye Irritation, Multiple Dose Effects                 |
| A02117 | Acute Toxicity, Mutagenicity, Skin and Eye Irritation                                        |
| A02118 | Mutagenicity                                                                                 |
| A02119 | Acute Toxicity, Mutagenicity, Tumorigenicity                                                 |
| A02120 | Acute Toxicity, Skin and Eye Irritation                                                      |
| A02121 | Acute Toxicity                                                                               |
| A02122 | Acute Toxicity, Skin and Eye Irritation, Multiple Dose Effects                               |
| A02123 | Mutagenicity                                                                                 |
| A02124 | Acute Toxicity                                                                               |
| A02125 | Acute Toxicity                                                                               |
| A02126 | Acute Toxicity                                                                               |

|        |                                                                                                    |
|--------|----------------------------------------------------------------------------------------------------|
| A02127 | Acute Toxicity, Mutagenicity                                                                       |
| A02128 | Mutagenicity                                                                                       |
| A02129 | Acute Toxicity, Mutagenicity, Skin and Eye Irritation, Reproductive Effects, Multiple Dose Effects |
| A02130 | Acute Toxicity, Mutagenicity                                                                       |
| A02131 | Acute Toxicity, Mutagenicity                                                                       |
| A02132 | Acute Toxicity                                                                                     |
| A02133 | Acute Toxicity                                                                                     |
| A02134 | Acute Toxicity, Mutagenicity, Skin and Eye Irritation                                              |
| A02135 | Acute Toxicity, Skin and Eye Irritation, Multiple Dose Effects                                     |
| A02136 | Acute Toxicity, Skin and Eye Irritation                                                            |
| A02137 | Acute Toxicity, Skin and Eye Irritation, Multiple Dose Effects                                     |
| A02138 | Acute Toxicity, Mutagenicity, Skin and Eye Irritation, Reproductive Effects                        |
| A02139 | Acute Toxicity, Skin and Eye Irritation, Reproductive Effects                                      |
| A02140 | Acute Toxicity, Mutagenicity, Multiple Dose Effects                                                |
| A02141 | Acute Toxicity, Mutagenicity                                                                       |
| A02142 | Acute Toxicity, Mutagenicity, Tumorigenicity                                                       |
| A02143 | Acute Toxicity, Mutagenicity, Skin and Eye Irritation, Reproductive Effects                        |
| A02144 | Acute Toxicity, Mutagenicity                                                                       |
| A02145 | Acute Toxicity                                                                                     |
| A02146 | Acute Toxicity, Mutagenicity, Tumorigenicity, Skin and Eye Irritation, Multiple Dose Effects       |
| A02147 | Acute Toxicity, Mutagenicity                                                                       |
| A02148 | Acute Toxicity, Mutagenicity, Skin and Eye Irritation, Reproductive Effects, Multiple Dose Effects |
| A02149 | Skin and Eye Irritation                                                                            |
| A02150 | Acute Toxicity                                                                                     |
| A02151 | Acute Toxicity                                                                                     |
| A02152 | Acute Toxicity, Mutagenicity, Tumorigenicity, Skin and Eye Irritation, Multiple Dose Effects       |
| A02153 | Acute Toxicity                                                                                     |
| A02154 | Acute Toxicity, Mutagenicity, Multiple Dose Effects                                                |
| A02155 | Acute Toxicity, Skin and Eye Irritation, Multiple Dose Effects                                     |
| A02156 | Acute Toxicity, Mutagenicity, Tumorigenicity, Skin and Eye Irritation,                             |
| A02157 | Mutagenicity                                                                                       |
| A02158 | Acute Toxicity                                                                                     |
| A02159 | Acute Toxicity                                                                                     |
| A02160 | Acute Toxicity                                                                                     |
| A02161 | Acute Toxicity                                                                                     |
| A02162 | Acute Toxicity, Skin and Eye Irritation                                                            |
| A02163 | Mutagenicity                                                                                       |
| A02164 | Acute Toxicity, Skin and Eye Irritation, Multiple Dose Effects                                     |
| A02165 | Acute Toxicity, Multiple Dose Effects                                                              |
| A02166 | Acute Toxicity                                                                                     |
| A02167 | Acute Toxicity, Mutagenicity, Tumorigenicity, Skin and Eye Irritation                              |
| A02168 | Acute Toxicity                                                                                     |

|        |                                                                                                    |
|--------|----------------------------------------------------------------------------------------------------|
| A02169 | Acute Toxicity                                                                                     |
| A02170 | Acute Toxicity, Reproductive Effects                                                               |
| A02171 | Acute Toxicity                                                                                     |
| A02172 | Acute Toxicity                                                                                     |
| A02173 | Acute Toxicity, Mutagenicity, Multiple Dose Effects                                                |
| A02174 | Acute Toxicity, Mutagenicity, Multiple Dose Effects                                                |
| A02175 | Acute Toxicity, Mutagenicity, Tumorigenicity                                                       |
| A02176 | Acute Toxicity                                                                                     |
| A02177 | Acute Toxicity, Mutagenicity, Tumorigenicity, Multiple Dose Effects                                |
| A02178 | Acute Toxicity, Mutagenicity                                                                       |
| A02179 | Acute Toxicity                                                                                     |
| A02180 | Acute Toxicity, Mutagenicity, Tumorigenicity, Skin and Eye Irritation                              |
| A02181 | Acute Toxicity, Mutagenicity, Tumorigenicity, Multiple Dose Effects                                |
| A02182 | Acute Toxicity, Mutagenicity                                                                       |
| A02183 | Acute Toxicity                                                                                     |
| A02184 | Mutagenicity                                                                                       |
| A02185 | Acute Toxicity, Mutagenicity, Reproductive Effects, Multiple Dose Effects                          |
| A02186 | Acute Toxicity, Mutagenicity, Tumorigenicity, Skin and Eye Irritation                              |
| A02187 | Acute Toxicity, Mutagenicity                                                                       |
| A02188 | Acute Toxicity, Mutagenicity, Tumorigenicity                                                       |
| A02189 | Acute Toxicity                                                                                     |
| A02190 | Acute Toxicity, Mutagenicity, Tumorigenicity, Skin and Eye Irritation                              |
| A02191 | Acute Toxicity, Mutagenicity, Skin and Eye Irritation                                              |
| A02192 | Acute Toxicity, Mutagenicity, Skin and Eye Irritation, Reproductive Effects, Multiple Dose Effects |
| A02193 | Mutagenicity                                                                                       |
| A02194 | Acute Toxicity, Mutagenicity, Tumorigenicity                                                       |
| A02195 | Acute Toxicity, Mutagenicity, Tumorigenicity                                                       |
| A02196 | Acute Toxicity                                                                                     |
| A02197 | Acute Toxicity, Mutagenicity, Tumorigenicity                                                       |
| A02198 | Mutagenicity, Tumorigenicity                                                                       |
| A02199 | Acute Toxicity, Mutagenicity, Tumorigenicity                                                       |
| A02200 | Acute Toxicity                                                                                     |
| A02201 | Acute Toxicity, Skin and Eye Irritation                                                            |
| A02202 | Acute Toxicity, Mutagenicity, Multiple Dose Effects                                                |
| A02203 | Acute Toxicity                                                                                     |
| A02204 | Acute Toxicity, Skin and Eye Irritation, Multiple Dose Effects                                     |
| A02205 | Mutagenicity                                                                                       |
| A02206 | Acute Toxicity, Mutagenicity                                                                       |
| A02207 | Acute Toxicity, Multiple Dose Effects                                                              |
| A02208 | Acute Toxicity, Mutagenicity                                                                       |
| A02209 | Acute Toxicity, Mutagenicity                                                                       |
| A02210 | Acute Toxicity, Mutagenicity, Multiple Dose Effects                                                |
| A02211 | Acute Toxicity, Mutagenicity                                                                       |
| A02212 | Acute Toxicity, Tumorigenicity, Multiple Dose Effects                                              |
| A02213 | Acute Toxicity                                                                                     |

|        |                                                                                              |
|--------|----------------------------------------------------------------------------------------------|
| A02214 | Acute Toxicity, Mutagenicity, Tumorigenicity, Skin and Eye Irritation                        |
| A02215 | Acute Toxicity, Mutagenicity, Tumorigenicity, Skin and Eye Irritation, Multiple Dose Effects |
| A02216 | Acute Toxicity, Mutagenicity, Skin and Eye Irritation                                        |
| A02217 | Mutagenicity, Tumorigenicity                                                                 |
| A02218 | Mutagenicity                                                                                 |
| A02219 | Acute Toxicity, Mutagenicity, Skin and Eye Irritation                                        |
| A02220 | Mutagenicity                                                                                 |
| A02221 | Acute Toxicity, Mutagenicity, Tumorigenicity, Multiple Dose Effects                          |
| A02222 | Acute Toxicity, Mutagenicity, Tumorigenicity                                                 |
| A02223 | Acute Toxicity, Mutagenicity, Multiple Dose Effects                                          |
| A02224 | Acute Toxicity                                                                               |
| A02225 | Acute Toxicity                                                                               |
| A02226 | Acute Toxicity                                                                               |
| A02227 | Acute Toxicity, Mutagenicity, Tumorigenicity, Reproductive Effects                           |
| A02228 | Acute Toxicity, Mutagenicity, Tumorigenicity                                                 |
| A02229 | Acute Toxicity, Mutagenicity, Skin and Eye Irritation                                        |
| A02230 | Acute Toxicity                                                                               |
| A02231 | Acute Toxicity, Mutagenicity, Tumorigenicity                                                 |
| A02232 | Acute Toxicity, Mutagenicity, Multiple Dose Effects                                          |
| A02233 | Acute Toxicity                                                                               |
| A02234 | Acute Toxicity                                                                               |
| A02235 | Acute Toxicity, Mutagenicity, Skin and Eye Irritation                                        |
| A02236 | Acute Toxicity, Mutagenicity                                                                 |
| A02237 | Acute Toxicity, Mutagenicity, Skin and Eye Irritation                                        |
| A02238 | Acute Toxicity                                                                               |
| A02239 | Acute Toxicity, Mutagenicity                                                                 |
| A02240 | Acute Toxicity, Mutagenicity, Tumorigenicity, Skin and Eye Irritation,                       |
| A02241 | Acute Toxicity, Mutagenicity, Skin and Eye Irritation                                        |
| A02242 | Acute Toxicity, Skin and Eye Irritation                                                      |
| A02243 | Acute Toxicity, Mutagenicity                                                                 |
| A02244 | Acute Toxicity, Mutagenicity, Tumorigenicity, Skin and Eye Irritation                        |
| A02245 | Acute Toxicity, Mutagenicity, Multiple Dose Effects                                          |
| A02246 | Mutagenicity                                                                                 |
| A02247 | Acute Toxicity                                                                               |
| A02248 | Acute Toxicity                                                                               |
| A02249 | Acute Toxicity, Skin and Eye Irritation                                                      |
| A02250 | Acute Toxicity, Skin and Eye Irritation, Multiple Dose Effects                               |
| A02251 | Acute Toxicity, Mutagenicity, Skin and Eye Irritation, Multiple Dose Effects                 |
| A02252 | Acute Toxicity                                                                               |
| A02253 | Acute Toxicity                                                                               |
| A02254 | Acute Toxicity, Mutagenicity, Reproductive Effects, Multiple Dose Effects                    |
| A02255 | Acute Toxicity, Mutagenicity, Multiple Dose Effects                                          |
| A02256 | Acute Toxicity                                                                               |
| A02257 | Acute Toxicity, Mutagenicity, Tumorigenicity, Reproductive Effects,                          |
| A02258 | Mutagenicity, Skin and Eye Irritation, Reproductive Effects                                  |

|        |                                                                                                    |
|--------|----------------------------------------------------------------------------------------------------|
| A02259 | Reproductive Effects                                                                               |
| A02260 | Acute Toxicity                                                                                     |
| A02261 | Acute Toxicity                                                                                     |
| A02262 | Acute Toxicity                                                                                     |
| A02263 | Acute Toxicity                                                                                     |
| A02264 | Tumorigenicity                                                                                     |
| A02265 | Acute Toxicity, Multiple Dose Effects                                                              |
| A02266 | Acute Toxicity, Mutagenicity, Tumorigenicity, Reproductive Effects                                 |
| A02267 | Acute Toxicity                                                                                     |
| A02268 | Acute Toxicity, Mutagenicity, Skin and Eye Irritation, Multiple Dose Effects                       |
| A02269 | Acute Toxicity                                                                                     |
| A02270 | Acute Toxicity                                                                                     |
| A02271 | Acute Toxicity, Skin and Eye Irritation                                                            |
| A02272 | Skin and Eye Irritation, Multiple Dose Effects                                                     |
| A02273 | Acute Toxicity                                                                                     |
| A02274 | Acute Toxicity                                                                                     |
| A02275 | Acute Toxicity, Mutagenicity, Tumorigenicity, Skin and Eye Irritation, Multiple Dose Effects       |
| A02276 | Acute Toxicity, Skin and Eye Irritation                                                            |
| A02277 | Acute Toxicity, Multiple Dose Effects                                                              |
| A02278 | Acute Toxicity, Mutagenicity, Tumorigenicity, Skin and Eye Irritation, Multiple Dose Effects       |
| A02279 | Acute Toxicity, Skin and Eye Irritation                                                            |
| A02280 | Acute Toxicity, Skin and Eye Irritation                                                            |
| A02281 | Acute Toxicity                                                                                     |
| A02282 | Acute Toxicity, Skin and Eye Irritation                                                            |
| A02283 | Acute Toxicity, Mutagenicity, Tumorigenicity, Skin and Eye Irritation, Multiple Dose Effects       |
| A02284 | Acute Toxicity, Mutagenicity, Tumorigenicity, Skin and Eye Irritation,                             |
| A02285 | Acute Toxicity, Mutagenicity, Tumorigenicity, Reproductive Effects,                                |
| A02286 | Acute Toxicity, Mutagenicity                                                                       |
| A02287 | Acute Toxicity, Mutagenicity, Skin and Eye Irritation, Reproductive Effects, Multiple Dose Effects |
| A02288 | Acute Toxicity                                                                                     |
| A02289 | Acute Toxicity                                                                                     |
| A02290 | Acute Toxicity, Mutagenicity, Tumorigenicity                                                       |
| A02291 | Acute Toxicity, Multiple Dose Effects                                                              |
| A02292 | Acute Toxicity, Mutagenicity, Skin and Eye Irritation, Multiple Dose Effects                       |
| A02293 | Acute Toxicity                                                                                     |
| A02294 | Acute Toxicity, Skin and Eye Irritation                                                            |
| A02295 | Acute Toxicity, Skin and Eye Irritation, Multiple Dose Effects                                     |
| A02296 | Acute Toxicity, Mutagenicity, Tumorigenicity, Skin and Eye Irritation,                             |
| A02297 | Acute Toxicity, Mutagenicity                                                                       |
| A02298 | Acute Toxicity, Mutagenicity, Skin and Eye Irritation, Reproductive Effects, Multiple Dose Effects |
| A02299 | Acute Toxicity, Mutagenicity, Skin and Eye Irritation, Multiple Dose Effects                       |

|        |                                                                                                 |
|--------|-------------------------------------------------------------------------------------------------|
| A02300 | Acute Toxicity, Mutagenicity, Tumorigenicity, Skin and Eye Irritation,                          |
| A02301 | Acute Toxicity, Mutagenicity, Multiple Dose Effects                                             |
| A02302 | Acute Toxicity                                                                                  |
| A02303 | Acute Toxicity, Mutagenicity, Tumorigenicity, Skin and Eye Irritation,                          |
| A02304 | Acute Toxicity, Mutagenicity, Tumorigenicity, Skin and Eye Irritation,<br>Multiple Dose Effects |
| A02305 | Acute Toxicity, Reproductive Effects, Multiple Dose Effects                                     |
| A02306 | Acute Toxicity, Mutagenicity, Tumorigenicity, Reproductive Effects,                             |
| A02307 | Acute Toxicity, Mutagenicity, Multiple Dose Effects                                             |
| A02308 | Acute Toxicity, Mutagenicity                                                                    |
| A02309 | Acute Toxicity, Tumorigenicity, Multiple Dose Effects                                           |
| A02310 | Acute Toxicity, Mutagenicity, Multiple Dose Effects                                             |
| A02311 | Acute Toxicity, Mutagenicity, Tumorigenicity                                                    |
| A02312 | Acute Toxicity, Mutagenicity, Skin and Eye Irritation, Multiple Dose Effects                    |
| A02313 | Acute Toxicity, Tumorigenicity, Skin and Eye Irritation                                         |
| A02314 | Acute Toxicity, Multiple Dose Effects                                                           |
| A02315 | Acute Toxicity, Mutagenicity, Tumorigenicity                                                    |
| A02316 | Acute Toxicity, Mutagenicity, Skin and Eye Irritation, Multiple Dose Effects                    |
| A02317 | Acute Toxicity, Mutagenicity                                                                    |
| A02318 | Acute Toxicity, Mutagenicity, Multiple Dose Effects                                             |
| A02319 | Acute Toxicity, Mutagenicity, Tumorigenicity                                                    |
| A02320 | Acute Toxicity, Mutagenicity, Tumorigenicity, Skin and Eye Irritation,                          |
| A02321 | Acute Toxicity, Mutagenicity, Multiple Dose Effects                                             |
| A02322 | Mutagenicity, Tumorigenicity, Skin and Eye Irritation, Multiple Dose Effects                    |
| A02323 | Mutagenicity                                                                                    |
| A02324 | Acute Toxicity, Mutagenicity, Skin and Eye Irritation                                           |
| A02325 | Acute Toxicity, Mutagenicity                                                                    |
| A02326 | Acute Toxicity, Tumorigenicity, Multiple Dose Effects                                           |
| A02327 | Acute Toxicity, Skin and Eye Irritation                                                         |
| A02328 | Acute Toxicity, Mutagenicity, Multiple Dose Effects                                             |
| A02329 | Acute Toxicity, Mutagenicity, Multiple Dose Effects                                             |
| A02330 | Acute Toxicity, Mutagenicity, Tumorigenicity, Skin and Eye Irritation,                          |
| A02331 | Acute Toxicity, Multiple Dose Effects                                                           |
| A02332 | Acute Toxicity, Skin and Eye Irritation, Reproductive Effects, Multiple Dose                    |
| A02333 | Acute Toxicity, Mutagenicity, Tumorigenicity, Skin and Eye Irritation,                          |
| A02334 | Acute Toxicity, Mutagenicity, Reproductive Effects                                              |
| A02335 | Acute Toxicity, Mutagenicity, Tumorigenicity, Skin and Eye Irritation,                          |
| A02336 | Acute Toxicity, Mutagenicity, Tumorigenicity, Skin and Eye Irritation,<br>Multiple Dose Effects |
| A02337 | Acute Toxicity, Mutagenicity, Skin and Eye Irritation                                           |
| A02338 | Acute Toxicity, Mutagenicity, Tumorigenicity, Skin and Eye Irritation,                          |
| A02339 | Acute Toxicity, Mutagenicity                                                                    |
| A02340 | Acute Toxicity, Mutagenicity, Skin and Eye Irritation                                           |
| A02341 | Acute Toxicity, Mutagenicity, Tumorigenicity, Skin and Eye Irritation,                          |
| A02342 | Acute Toxicity, Mutagenicity, Tumorigenicity, Skin and Eye Irritation,                          |
| A02343 | Acute Toxicity, Mutagenicity, Reproductive Effects, Multiple Dose Effects                       |

|        |                                                                                                       |
|--------|-------------------------------------------------------------------------------------------------------|
| A02344 | Acute Toxicity, Mutagenicity, Reproductive Effects                                                    |
| A02345 | Acute Toxicity, Mutagenicity, Tumorigenicity, Skin and Eye Irritation,                                |
| A02346 | Acute Toxicity, Mutagenicity                                                                          |
| A02347 | Acute Toxicity, Mutagenicity, Multiple Dose Effects                                                   |
| A02348 | Acute Toxicity, Skin and Eye Irritation                                                               |
| A02349 | Acute Toxicity, Mutagenicity, Skin and Eye Irritation                                                 |
| A02350 | Acute Toxicity, Mutagenicity, Tumorigenicity, Skin and Eye Irritation,                                |
| A02351 | Acute Toxicity, Mutagenicity, Tumorigenicity, Skin and Eye Irritation                                 |
| A02352 | Mutagenicity                                                                                          |
| A02353 | Acute Toxicity, Mutagenicity, Multiple Dose Effects                                                   |
| A02354 | Acute Toxicity                                                                                        |
| A02355 | Acute Toxicity, Mutagenicity, Tumorigenicity, Reproductive Effects,                                   |
| A02356 | Acute Toxicity, Skin and Eye Irritation, Multiple Dose Effects                                        |
| A02357 | Acute Toxicity, Skin and Eye Irritation                                                               |
| A02358 | Acute Toxicity, Multiple Dose Effects                                                                 |
| A02359 | Acute Toxicity, Mutagenicity                                                                          |
| A02360 | Acute Toxicity, Mutagenicity, Skin and Eye Irritation, Reproductive Effects                           |
| A02361 | Acute Toxicity                                                                                        |
| A02362 | Acute Toxicity, Tumorigenicity                                                                        |
| A02363 | Acute Toxicity, Mutagenicity, Multiple Dose Effects                                                   |
| A02364 | Acute Toxicity, Mutagenicity, Skin and Eye Irritation                                                 |
| A02365 | Acute Toxicity                                                                                        |
| A02366 | Acute Toxicity, Mutagenicity, Multiple Dose Effects                                                   |
| A02367 | Mutagenicity, Skin and Eye Irritation                                                                 |
| A02368 | Acute Toxicity, Mutagenicity                                                                          |
| A02369 | Acute Toxicity, Skin and Eye Irritation                                                               |
| A02370 | Acute Toxicity, Skin and Eye Irritation                                                               |
| A02371 | Acute Toxicity, Mutagenicity, Skin and Eye Irritation, Reproductive Effects,<br>Multiple Dose Effects |
| A02372 | Acute Toxicity, Skin and Eye Irritation                                                               |
| A02373 | Acute Toxicity, Mutagenicity, Tumorigenicity, Skin and Eye Irritation,                                |
| A02374 | Acute Toxicity, Mutagenicity, Skin and Eye Irritation, Multiple Dose Effects                          |
| A02375 | Acute Toxicity, Mutagenicity, Skin and Eye Irritation, Reproductive Effects                           |
| A02376 | Acute Toxicity, Mutagenicity, Skin and Eye Irritation, Reproductive Effects,<br>Multiple Dose Effects |
| A02377 | Acute Toxicity, Mutagenicity, Skin and Eye Irritation                                                 |
| A02378 | Acute Toxicity, Skin and Eye Irritation                                                               |
| A02379 | Acute Toxicity, Skin and Eye Irritation                                                               |
| A02380 | Acute Toxicity, Mutagenicity, Skin and Eye Irritation, Reproductive Effects,<br>Multiple Dose Effects |
| A02381 | Acute Toxicity, Mutagenicity, Tumorigenicity, Skin and Eye Irritation,<br>Multiple Dose Effects       |
| A02382 | Acute Toxicity, Mutagenicity, Tumorigenicity, Skin and Eye Irritation,                                |
| A02383 | Acute Toxicity, Reproductive Effects, Multiple Dose Effects                                           |
| A02384 | Acute Toxicity, Skin and Eye Irritation                                                               |
| A02385 | Acute Toxicity, Multiple Dose Effects                                                                 |

|        |                                                                                                    |
|--------|----------------------------------------------------------------------------------------------------|
| A02386 | Acute Toxicity, Mutagenicity, Tumorigenicity, Multiple Dose Effects                                |
| A02387 | Acute Toxicity, Mutagenicity, Multiple Dose Effects                                                |
| A02388 | Acute Toxicity                                                                                     |
| A02389 | Acute Toxicity, Multiple Dose Effects                                                              |
| A02390 | Acute Toxicity, Mutagenicity, Skin and Eye Irritation                                              |
| A02391 | Acute Toxicity, Mutagenicity                                                                       |
| A02392 | Acute Toxicity, Mutagenicity, Skin and Eye Irritation, Multiple Dose Effects                       |
| A02393 | Acute Toxicity                                                                                     |
| A02394 | Acute Toxicity                                                                                     |
| A02395 | Acute Toxicity                                                                                     |
| A02396 | Acute Toxicity                                                                                     |
| A02397 | Acute Toxicity, Mutagenicity, Tumorigenicity, Skin and Eye Irritation                              |
| A02398 | Mutagenicity                                                                                       |
| A02399 | Acute Toxicity, Mutagenicity                                                                       |
| A02400 | Mutagenicity, Skin and Eye Irritation                                                              |
| A02401 | Skin and Eye Irritation                                                                            |
| A02402 | Acute Toxicity, Mutagenicity, Skin and Eye Irritation, Multiple Dose Effects                       |
| A02403 | Acute Toxicity, Multiple Dose Effects                                                              |
| A02404 | Acute Toxicity, Mutagenicity                                                                       |
| A02405 | Acute Toxicity, Mutagenicity, Tumorigenicity, Skin and Eye Irritation, Multiple Dose Effects       |
| A02406 | Acute Toxicity, Mutagenicity, Multiple Dose Effects                                                |
| A02407 | Skin and Eye Irritation, Multiple Dose Effects                                                     |
| A02408 | Acute Toxicity, Skin and Eye Irritation                                                            |
| A02409 | Acute Toxicity                                                                                     |
| A02410 | Acute Toxicity, Skin and Eye Irritation, Reproductive Effects, Multiple Dose                       |
| A02411 | Acute Toxicity                                                                                     |
| A02412 | Acute Toxicity, Mutagenicity, Skin and Eye Irritation, Multiple Dose Effects                       |
| A02413 | Acute Toxicity, Mutagenicity, Skin and Eye Irritation, Multiple Dose Effects                       |
| A02414 | Acute Toxicity                                                                                     |
| A02415 | Acute Toxicity, Mutagenicity, Tumorigenicity, Skin and Eye Irritation, Multiple Dose Effects       |
| A02416 | Acute Toxicity, Mutagenicity, Skin and Eye Irritation, Reproductive Effects, Multiple Dose Effects |
| A02417 | Acute Toxicity, Mutagenicity, Tumorigenicity                                                       |
| A02418 | Acute Toxicity, Mutagenicity, Tumorigenicity, Skin and Eye Irritation                              |
| A02419 | Acute Toxicity, Mutagenicity                                                                       |
| A02420 | Acute Toxicity, Mutagenicity                                                                       |
| A02421 | Acute Toxicity                                                                                     |
| A02422 | Acute Toxicity, Mutagenicity, Skin and Eye Irritation                                              |
| A02423 | Acute Toxicity, Multiple Dose Effects                                                              |
| A02424 | Acute Toxicity                                                                                     |
| A02425 | Acute Toxicity, Reproductive Effects                                                               |
| A02426 | Mutagenicity                                                                                       |
| A02427 | Acute Toxicity, Mutagenicity, Skin and Eye Irritation, Reproductive Effects, Multiple Dose Effects |



|        |                                                                                                    |
|--------|----------------------------------------------------------------------------------------------------|
| A02428 | Acute Toxicity, Mutagenicity, Skin and Eye Irritation, Multiple Dose Effects                       |
| A02429 | Acute Toxicity                                                                                     |
| A02430 | Mutagenicity                                                                                       |
| A02431 | Acute Toxicity, Tumorigenicity, Multiple Dose Effects                                              |
| A02432 | Acute Toxicity, Mutagenicity, Tumorigenicity, Multiple Dose Effects                                |
| A02433 | Acute Toxicity                                                                                     |
| A02434 | Mutagenicity                                                                                       |
| A02435 | Mutagenicity, Skin and Eye Irritation                                                              |
| A02436 | Acute Toxicity, Mutagenicity, Tumorigenicity, Skin and Eye Irritation, Multiple Dose Effects       |
| A02437 | Acute Toxicity, Mutagenicity                                                                       |
| A02438 | Mutagenicity, Tumorigenicity                                                                       |
| A02439 | Acute Toxicity, Skin and Eye Irritation                                                            |
| A02440 | Acute Toxicity, Mutagenicity                                                                       |
| A02441 | Mutagenicity                                                                                       |
| A02442 | Acute Toxicity                                                                                     |
| A02443 | Acute Toxicity, Mutagenicity, Skin and Eye Irritation, Reproductive Effects, Multiple Dose Effects |
| A02444 | Mutagenicity, Tumorigenicity                                                                       |
| A02445 | Acute Toxicity, Mutagenicity, Tumorigenicity, Multiple Dose Effects                                |
| A02446 | Skin and Eye Irritation                                                                            |
| A02447 | Acute Toxicity, Mutagenicity                                                                       |
| A02448 | Acute Toxicity, Reproductive Effects, Multiple Dose Effects                                        |
| A02449 | Acute Toxicity, Skin and Eye Irritation, Multiple Dose Effects                                     |
| A02450 | Acute Toxicity, Mutagenicity, Skin and Eye Irritation, Reproductive Effects, Multiple Dose Effects |
| A02451 | Acute Toxicity, Mutagenicity                                                                       |
| A02452 | Acute Toxicity, Mutagenicity, Tumorigenicity                                                       |
| A02453 | Acute Toxicity, Mutagenicity, Skin and Eye Irritation                                              |
| A02454 | Acute Toxicity, Mutagenicity, Skin and Eye Irritation, Multiple Dose Effects                       |
| A02455 | Acute Toxicity                                                                                     |
| A02456 | Mutagenicity                                                                                       |
| A02457 | Acute Toxicity, Skin and Eye Irritation                                                            |
| A02458 | Acute Toxicity, Mutagenicity, Skin and Eye Irritation                                              |
| A02459 | Acute Toxicity, Mutagenicity, Skin and Eye Irritation, Reproductive Effects                        |
| A02460 | Acute Toxicity, Mutagenicity, Skin and Eye Irritation, Multiple Dose Effects                       |
| A02461 | Acute Toxicity                                                                                     |
| A02462 | Acute Toxicity, Multiple Dose Effects                                                              |
| A02463 | Acute Toxicity, Mutagenicity                                                                       |
| A02464 | Acute Toxicity, Reproductive Effects                                                               |
| A02465 | Acute Toxicity, Reproductive Effects, Multiple Dose Effects                                        |
| A02466 | Acute Toxicity, Mutagenicity, Skin and Eye Irritation                                              |
| A02467 | Acute Toxicity, Mutagenicity, Multiple Dose Effects                                                |
| A02468 | Acute Toxicity, Mutagenicity, Tumorigenicity, Reproductive Effects,                                |
| A02469 | Acute Toxicity, Mutagenicity, Tumorigenicity, Reproductive Effects,                                |
| A02470 | Acute Toxicity, Mutagenicity, Tumorigenicity, Skin and Eye Irritation,                             |

|        |                                                                                                 |
|--------|-------------------------------------------------------------------------------------------------|
| A02471 | Acute Toxicity, Skin and Eye Irritation, Multiple Dose Effects                                  |
| A02472 | Acute Toxicity                                                                                  |
| A02473 | Acute Toxicity, Multiple Dose Effects                                                           |
| A02474 | Mutagenicity                                                                                    |
| A02475 | Mutagenicity                                                                                    |
| A02476 | Acute Toxicity, Mutagenicity, Multiple Dose Effects                                             |
| A02477 | Acute Toxicity, Mutagenicity, Multiple Dose Effects                                             |
| A02478 | Acute Toxicity, Multiple Dose Effects                                                           |
| A02479 | Mutagenicity                                                                                    |
| A02480 | Acute Toxicity, Mutagenicity, Reproductive Effects, Multiple Dose Effects                       |
| A02481 | Acute Toxicity, Mutagenicity, Tumorigenicity, Skin and Eye Irritation,                          |
| A02482 | Acute Toxicity, Mutagenicity                                                                    |
| A02483 | Acute Toxicity                                                                                  |
| A02484 | Acute Toxicity, Mutagenicity                                                                    |
| A02485 | Acute Toxicity, Mutagenicity                                                                    |
| A02486 | Mutagenicity, Multiple Dose Effects                                                             |
| A02487 | Acute Toxicity, Mutagenicity, Skin and Eye Irritation, Multiple Dose Effects                    |
| A02488 | Acute Toxicity, Mutagenicity                                                                    |
| A02489 | Acute Toxicity, Mutagenicity, Tumorigenicity, Skin and Eye Irritation,                          |
| A02490 | Acute Toxicity, Mutagenicity, Tumorigenicity, Skin and Eye Irritation,                          |
| A02491 | Acute Toxicity, Mutagenicity, Tumorigenicity, Skin and Eye Irritation,                          |
| A02492 | Acute Toxicity, Mutagenicity, Tumorigenicity, Skin and Eye Irritation                           |
| A02493 | Acute Toxicity, Mutagenicity, Tumorigenicity, Reproductive Effects,                             |
| A02494 | Acute Toxicity, Skin and Eye Irritation                                                         |
| A02495 | Acute Toxicity, Mutagenicity, Skin and Eye Irritation, Multiple Dose Effects                    |
| A02496 | Acute Toxicity                                                                                  |
| A02497 | Acute Toxicity, Mutagenicity, Skin and Eye Irritation, Multiple Dose Effects                    |
| A02498 | Acute Toxicity, Mutagenicity, Tumorigenicity, Skin and Eye Irritation                           |
| A02499 | Acute Toxicity                                                                                  |
| A02500 | Acute Toxicity                                                                                  |
| A02501 | Acute Toxicity, Mutagenicity, Multiple Dose Effects                                             |
| A02502 | Acute Toxicity, Mutagenicity, Tumorigenicity, Reproductive Effects,                             |
| A02503 | Acute Toxicity, Mutagenicity, Multiple Dose Effects                                             |
| A02504 | Acute Toxicity, Mutagenicity, Multiple Dose Effects                                             |
| A02505 | Acute Toxicity                                                                                  |
| A02506 | Acute Toxicity, Mutagenicity, Tumorigenicity, Skin and Eye Irritation,<br>Multiple Dose Effects |
| A02507 | Acute Toxicity                                                                                  |
| A02508 | Skin and Eye Irritation                                                                         |
| A02509 | Acute Toxicity, Skin and Eye Irritation                                                         |
| A02510 | Acute Toxicity, Mutagenicity, Skin and Eye Irritation                                           |
| A02511 | Acute Toxicity, Mutagenicity, Tumorigenicity                                                    |
| A02512 | Acute Toxicity, Skin and Eye Irritation                                                         |
| A02513 | Acute Toxicity, Mutagenicity, Skin and Eye Irritation                                           |
| A02514 | Mutagenicity, Skin and Eye Irritation                                                           |
| A02515 | Acute Toxicity                                                                                  |

|        |                                                                                                    |
|--------|----------------------------------------------------------------------------------------------------|
| A02516 | Acute Toxicity                                                                                     |
| A02517 | Acute Toxicity                                                                                     |
| A02518 | Acute Toxicity, Tumorigenicity, Skin and Eye Irritation                                            |
| A02519 | Acute Toxicity                                                                                     |
| A02520 | Acute Toxicity, Mutagenicity, Skin and Eye Irritation, Multiple Dose Effects                       |
| A02521 | Acute Toxicity, Mutagenicity, Tumorigenicity, Skin and Eye Irritation                              |
| A02522 | Acute Toxicity                                                                                     |
| A02523 | Acute Toxicity, Mutagenicity, Tumorigenicity, Multiple Dose Effects                                |
| A02524 | Acute Toxicity, Mutagenicity, Skin and Eye Irritation, Reproductive Effects, Multiple Dose Effects |
| A02525 | Acute Toxicity, Mutagenicity                                                                       |
| A02526 | Acute Toxicity, Multiple Dose Effects                                                              |
| A02527 | Acute Toxicity                                                                                     |
| A02528 | Acute Toxicity, Skin and Eye Irritation                                                            |
| A02529 | Acute Toxicity, Mutagenicity, Multiple Dose Effects                                                |
| A02530 | Acute Toxicity, Multiple Dose Effects                                                              |
| A02531 | Acute Toxicity, Mutagenicity, Tumorigenicity, Skin and Eye Irritation,                             |
| A02532 | Acute Toxicity, Mutagenicity, Tumorigenicity                                                       |
| A02533 | Mutagenicity                                                                                       |
| A02534 | Acute Toxicity, Mutagenicity                                                                       |
| A02535 | Acute Toxicity, Mutagenicity, Skin and Eye Irritation, Reproductive Effects, Multiple Dose Effects |
| A02536 | Acute Toxicity                                                                                     |
| A02537 | Acute Toxicity, Mutagenicity, Skin and Eye Irritation, Reproductive Effects, Multiple Dose Effects |
| A02538 | Acute Toxicity                                                                                     |
| A02539 | Acute Toxicity, Mutagenicity, Tumorigenicity, Skin and Eye Irritation, Multiple Dose Effects       |
| A02540 | Mutagenicity, Tumorigenicity                                                                       |
| A02541 | Acute Toxicity, Mutagenicity, Tumorigenicity, Skin and Eye Irritation,                             |
| A02542 | Acute Toxicity                                                                                     |
| A02543 | Acute Toxicity                                                                                     |
| A02544 | Acute Toxicity, Mutagenicity, Tumorigenicity, Skin and Eye Irritation                              |
| A02545 | Acute Toxicity, Mutagenicity, Skin and Eye Irritation, Reproductive Effects, Multiple Dose Effects |
| A02546 | Acute Toxicity, Mutagenicity, Tumorigenicity, Skin and Eye Irritation, Multiple Dose Effects       |
| A02547 | Acute Toxicity, Mutagenicity                                                                       |
| A02548 | Acute Toxicity, Tumorigenicity                                                                     |
| A02549 | Acute Toxicity, Mutagenicity, Multiple Dose Effects                                                |
| A02550 | Acute Toxicity                                                                                     |
| A02551 | Acute Toxicity, Mutagenicity                                                                       |
| A02552 | Acute Toxicity, Tumorigenicity                                                                     |
| A02553 | Acute Toxicity                                                                                     |
| A02554 | Acute Toxicity                                                                                     |
| A02555 | Acute Toxicity, Mutagenicity, Skin and Eye Irritation, Multiple Dose Effects                       |

|        |                                                                                              |
|--------|----------------------------------------------------------------------------------------------|
| A02556 | Acute Toxicity, Mutagenicity, Skin and Eye Irritation                                        |
| A02557 | Acute Toxicity                                                                               |
| A02558 | Acute Toxicity                                                                               |
| A02559 | Acute Toxicity, Multiple Dose Effects                                                        |
| A02560 | Acute Toxicity                                                                               |
| A02561 | Acute Toxicity, Mutagenicity, Multiple Dose Effects                                          |
| A02562 | Acute Toxicity                                                                               |
| A02563 | Acute Toxicity, Mutagenicity, Skin and Eye Irritation, Multiple Dose Effects                 |
| A02564 | Acute Toxicity, Mutagenicity, Tumorigenicity, Skin and Eye Irritation, Multiple Dose Effects |
| A02565 | Acute Toxicity, Mutagenicity, Tumorigenicity, Skin and Eye Irritation,                       |
| A02566 | Acute Toxicity                                                                               |
| A02567 | Acute Toxicity, Mutagenicity, Skin and Eye Irritation, Multiple Dose Effects                 |
| A02568 | Acute Toxicity, Mutagenicity, Multiple Dose Effects                                          |
| A02569 | Acute Toxicity, Skin and Eye Irritation                                                      |
| A02570 | Acute Toxicity                                                                               |
| A02571 | Acute Toxicity, Mutagenicity, Tumorigenicity, Skin and Eye Irritation, Multiple Dose Effects |
| A02572 | Acute Toxicity, Tumorigenicity, Skin and Eye Irritation                                      |
| A02573 | Acute Toxicity, Mutagenicity                                                                 |
| A02574 | Acute Toxicity, Mutagenicity, Tumorigenicity, Reproductive Effects,                          |
| A02575 | Acute Toxicity                                                                               |
| A02576 | Acute Toxicity, Mutagenicity, Skin and Eye Irritation, Multiple Dose Effects                 |
| A02577 | Acute Toxicity                                                                               |
| A02578 | Acute Toxicity, Skin and Eye Irritation, Multiple Dose Effects                               |
| A02579 | Acute Toxicity, Mutagenicity, Skin and Eye Irritation                                        |
| A02580 | Acute Toxicity, Skin and Eye Irritation                                                      |
| A02581 | Acute Toxicity                                                                               |
| A02582 | Acute Toxicity, Multiple Dose Effects                                                        |
| A02583 | Acute Toxicity, Mutagenicity                                                                 |
| A02584 | Acute Toxicity, Mutagenicity                                                                 |
| A02585 | Acute Toxicity, Mutagenicity, Multiple Dose Effects                                          |
| A02586 | Acute Toxicity, Mutagenicity, Tumorigenicity, Reproductive Effects,                          |
| A02587 | Acute Toxicity                                                                               |
| A02588 | Acute Toxicity                                                                               |
| A02589 | Acute Toxicity, Mutagenicity, Skin and Eye Irritation, Multiple Dose Effects                 |
| A02590 | Acute Toxicity                                                                               |
| A02591 | Mutagenicity                                                                                 |
| A02592 | Acute Toxicity                                                                               |
| A02593 | Acute Toxicity, Mutagenicity, Skin and Eye Irritation, Multiple Dose Effects                 |
| A02594 | Acute Toxicity                                                                               |
| A02595 | Acute Toxicity, Mutagenicity                                                                 |
| A02596 | Acute Toxicity                                                                               |
| A02597 | Acute Toxicity, Tumorigenicity, Skin and Eye Irritation                                      |
| A02598 | Acute Toxicity, Mutagenicity                                                                 |
| A02599 | Acute Toxicity, Skin and Eye Irritation, Multiple Dose Effects                               |

|        |                                                                                                    |
|--------|----------------------------------------------------------------------------------------------------|
| A02600 | Acute Toxicity, Multiple Dose Effects                                                              |
| A02601 | Acute Toxicity, Skin and Eye Irritation                                                            |
| A02602 | Acute Toxicity, Multiple Dose Effects                                                              |
| A02603 | Acute Toxicity, Mutagenicity                                                                       |
| A02604 | Acute Toxicity, Skin and Eye Irritation                                                            |
| A02605 | Acute Toxicity                                                                                     |
| A02606 | Acute Toxicity, Skin and Eye Irritation                                                            |
| A02607 | Acute Toxicity, Mutagenicity                                                                       |
| A02608 | Acute Toxicity, Mutagenicity, Skin and Eye Irritation                                              |
| A02609 | Acute Toxicity, Mutagenicity, Skin and Eye Irritation                                              |
| A02610 | Acute Toxicity, Mutagenicity, Skin and Eye Irritation                                              |
| A02611 | Acute Toxicity, Mutagenicity, Tumorigenicity, Skin and Eye Irritation,                             |
| A02612 | Acute Toxicity, Mutagenicity                                                                       |
| A02613 | Acute Toxicity, Mutagenicity, Multiple Dose Effects                                                |
| A02614 | Acute Toxicity, Mutagenicity, Skin and Eye Irritation                                              |
| A02615 | Acute Toxicity, Mutagenicity, Skin and Eye Irritation                                              |
| A02616 | Acute Toxicity, Mutagenicity                                                                       |
| A02617 | Acute Toxicity, Mutagenicity, Skin and Eye Irritation                                              |
| A02618 | Acute Toxicity, Mutagenicity                                                                       |
| A02619 | Acute Toxicity                                                                                     |
| A02620 | Acute Toxicity, Skin and Eye Irritation, Multiple Dose Effects                                     |
| A02621 | Acute Toxicity, Mutagenicity, Multiple Dose Effects                                                |
| A02622 | Acute Toxicity, Multiple Dose Effects                                                              |
| A02623 | Acute Toxicity, Multiple Dose Effects                                                              |
| A02624 | Acute Toxicity, Mutagenicity, Skin and Eye Irritation, Multiple Dose Effects                       |
| A02625 | Acute Toxicity                                                                                     |
| A02626 | Non-toxicity                                                                                       |
| A02627 | Acute Toxicity, Skin and Eye Irritation                                                            |
| A02628 | Acute Toxicity                                                                                     |
| A02629 | Mutagenicity, Tumorigenicity                                                                       |
| A02630 | Acute Toxicity, Skin and Eye Irritation                                                            |
| A02631 | Acute Toxicity, Mutagenicity, Skin and Eye Irritation                                              |
| A02632 | Acute Toxicity, Mutagenicity, Tumorigenicity, Skin and Eye Irritation                              |
| A02633 | Acute Toxicity, Mutagenicity, Tumorigenicity, Reproductive Effects                                 |
| A02634 | Acute Toxicity, Mutagenicity, Skin and Eye Irritation                                              |
| A02635 | Acute Toxicity                                                                                     |
| A02636 | Acute Toxicity, Skin and Eye Irritation                                                            |
| A02637 | Acute Toxicity, Mutagenicity, Skin and Eye Irritation                                              |
| A02638 | Acute Toxicity                                                                                     |
| A02639 | Acute Toxicity, Skin and Eye Irritation                                                            |
| A02640 | Acute Toxicity, Mutagenicity, Tumorigenicity, Reproductive Effects                                 |
| A02641 | Acute Toxicity, Mutagenicity, Skin and Eye Irritation, Reproductive Effects, Multiple Dose Effects |
| A02642 | Acute Toxicity, Mutagenicity, Tumorigenicity, Skin and Eye Irritation,                             |
| A02643 | Acute Toxicity                                                                                     |
| A02644 | Acute Toxicity, Mutagenicity, Tumorigenicity, Multiple Dose Effects                                |

|        |                                                                                                    |
|--------|----------------------------------------------------------------------------------------------------|
| A02645 | Acute Toxicity                                                                                     |
| A02646 | Acute Toxicity, Mutagenicity, Tumorigenicity, Skin and Eye Irritation                              |
| A02647 | Acute Toxicity, Skin and Eye Irritation                                                            |
| A02648 | Acute Toxicity, Skin and Eye Irritation                                                            |
| A02649 | Acute Toxicity, Mutagenicity, Reproductive Effects, Multiple Dose Effects                          |
| A02650 | Acute Toxicity, Skin and Eye Irritation                                                            |
| A02651 | Mutagenicity, Tumorigenicity                                                                       |
| A02652 | Acute Toxicity, Mutagenicity, Skin and Eye Irritation                                              |
| A02653 | Acute Toxicity, Skin and Eye Irritation                                                            |
| A02654 | Skin and Eye Irritation                                                                            |
| A02655 | Acute Toxicity, Mutagenicity                                                                       |
| A02656 | Acute Toxicity, Mutagenicity, Skin and Eye Irritation                                              |
| A02657 | Acute Toxicity, Mutagenicity, Skin and Eye Irritation                                              |
| A02658 | Acute Toxicity, Multiple Dose Effects                                                              |
| A02659 | Acute Toxicity, Skin and Eye Irritation                                                            |
| A02660 | Acute Toxicity, Mutagenicity                                                                       |
| A02661 | Acute Toxicity, Skin and Eye Irritation, Multiple Dose Effects                                     |
| A02662 | Acute Toxicity, Skin and Eye Irritation, Multiple Dose Effects                                     |
| A02663 | Acute Toxicity, Mutagenicity, Multiple Dose Effects                                                |
| A02664 | Acute Toxicity, Mutagenicity                                                                       |
| A02665 | Mutagenicity                                                                                       |
| A02666 | Acute Toxicity, Mutagenicity                                                                       |
| A02667 | Acute Toxicity, Tumorigenicity, Reproductive Effects                                               |
| A02668 | Acute Toxicity, Mutagenicity, Skin and Eye Irritation, Reproductive Effects, Multiple Dose Effects |
| A02669 | Acute Toxicity, Mutagenicity, Multiple Dose Effects                                                |
| A02670 | Acute Toxicity                                                                                     |
| A02671 | Acute Toxicity, Mutagenicity, Tumorigenicity, Skin and Eye Irritation, Multiple Dose Effects       |
| A02672 | Acute Toxicity, Mutagenicity, Tumorigenicity, Skin and Eye Irritation, Multiple Dose Effects       |
| A02673 | Acute Toxicity, Mutagenicity, Tumorigenicity, Skin and Eye Irritation, Multiple Dose Effects       |
| A02674 | Acute Toxicity, Tumorigenicity, Skin and Eye Irritation                                            |
| A02675 | Acute Toxicity                                                                                     |
| A02676 | Acute Toxicity, Mutagenicity                                                                       |
| A02677 | Acute Toxicity, Mutagenicity, Skin and Eye Irritation                                              |
| A02678 | Acute Toxicity, Mutagenicity, Skin and Eye Irritation, Multiple Dose Effects                       |
| A02679 | Acute Toxicity, Skin and Eye Irritation                                                            |
| A02680 | Acute Toxicity, Skin and Eye Irritation                                                            |
| A02681 | Acute Toxicity                                                                                     |
| A02682 | Acute Toxicity                                                                                     |
| A02683 | Acute Toxicity, Skin and Eye Irritation                                                            |
| A02684 | Acute Toxicity, Skin and Eye Irritation, Reproductive Effects, Multiple Dose                       |
| A02685 | Acute Toxicity, Mutagenicity, Tumorigenicity, Skin and Eye Irritation,                             |
| A02686 | Acute Toxicity, Mutagenicity, Tumorigenicity, Skin and Eye Irritation,                             |

|        |                                                                                                    |
|--------|----------------------------------------------------------------------------------------------------|
| A02687 | Acute Toxicity, Mutagenicity, Tumorigenicity, Skin and Eye Irritation,                             |
| A02688 | Acute Toxicity, Mutagenicity, Skin and Eye Irritation                                              |
| A02689 | Acute Toxicity, Mutagenicity, Skin and Eye Irritation, Reproductive Effects, Multiple Dose Effects |
| A02690 | Acute Toxicity, Mutagenicity, Tumorigenicity, Skin and Eye Irritation, Multiple Dose Effects       |
| A02691 | Acute Toxicity, Mutagenicity, Tumorigenicity, Skin and Eye Irritation,                             |
| A02692 | Acute Toxicity, Mutagenicity, Reproductive Effects, Multiple Dose Effects                          |
| A02693 | Acute Toxicity, Mutagenicity                                                                       |
| A02694 | Acute Toxicity                                                                                     |
| A02695 | Acute Toxicity, Mutagenicity                                                                       |
| A02696 | Acute Toxicity, Mutagenicity                                                                       |
| A02697 | Acute Toxicity, Mutagenicity, Tumorigenicity, Reproductive Effects,                                |
| A02698 | Acute Toxicity, Mutagenicity, Tumorigenicity, Skin and Eye Irritation,                             |
| A02699 | Acute Toxicity, Mutagenicity, Skin and Eye Irritation                                              |
| A02700 | Acute Toxicity, Mutagenicity                                                                       |
| A02701 | Acute Toxicity, Mutagenicity, Tumorigenicity, Skin and Eye Irritation,                             |
| A02702 | Acute Toxicity, Mutagenicity, Multiple Dose Effects                                                |
| A02703 | Acute Toxicity, Skin and Eye Irritation, Multiple Dose Effects                                     |
| A02704 | Acute Toxicity, Mutagenicity, Skin and Eye Irritation, Multiple Dose Effects                       |
| A02705 | Acute Toxicity, Mutagenicity, Skin and Eye Irritation, Reproductive Effects, Multiple Dose Effects |
| A02706 | Acute Toxicity, Mutagenicity, Tumorigenicity, Skin and Eye Irritation,                             |
| A02707 | Acute Toxicity, Mutagenicity, Tumorigenicity, Skin and Eye Irritation,                             |
| A02708 | Acute Toxicity, Mutagenicity, Skin and Eye Irritation                                              |
| A02709 | Acute Toxicity, Mutagenicity, Tumorigenicity, Skin and Eye Irritation,                             |
| A02710 | Acute Toxicity, Mutagenicity, Multiple Dose Effects                                                |
| A02711 | Acute Toxicity, Mutagenicity, Tumorigenicity, Skin and Eye Irritation, Multiple Dose Effects       |
| A02712 | Acute Toxicity, Mutagenicity, Reproductive Effects, Multiple Dose Effects                          |
| A02713 | Acute Toxicity, Mutagenicity, Tumorigenicity, Multiple Dose Effects                                |
| A02714 | Acute Toxicity, Mutagenicity                                                                       |
| A02715 | Acute Toxicity                                                                                     |
| A02716 | Mutagenicity                                                                                       |
| A02717 | Acute Toxicity, Skin and Eye Irritation                                                            |
| A02718 | Acute Toxicity, Mutagenicity, Multiple Dose Effects                                                |
| A02719 | Acute Toxicity                                                                                     |
| A02720 | Acute Toxicity                                                                                     |
| A02721 | Acute Toxicity                                                                                     |
| A02722 | Acute Toxicity                                                                                     |
| A02723 | Acute Toxicity, Skin and Eye Irritation, Reproductive Effects, Multiple Dose                       |
| A02724 | Mutagenicity                                                                                       |
| A02725 | Acute Toxicity, Mutagenicity, Tumorigenicity                                                       |
| A02726 | Acute Toxicity, Mutagenicity, Skin and Eye Irritation                                              |
| A02727 | Acute Toxicity, Skin and Eye Irritation, Multiple Dose Effects                                     |
| A02728 | Acute Toxicity                                                                                     |

|        |                                                                                                    |
|--------|----------------------------------------------------------------------------------------------------|
| A02729 | Multiple Dose Effects                                                                              |
| A02730 | Acute Toxicity, Mutagenicity, Skin and Eye Irritation, Multiple Dose Effects                       |
| A02731 | Acute Toxicity, Skin and Eye Irritation, Reproductive Effects, Multiple Dose                       |
| A02732 | Acute Toxicity, Skin and Eye Irritation                                                            |
| A02733 | Acute Toxicity                                                                                     |
| A02734 | Acute Toxicity, Mutagenicity, Tumorigenicity                                                       |
| A02735 | Acute Toxicity, Skin and Eye Irritation, Reproductive Effects, Multiple Dose                       |
| A02736 | Acute Toxicity, Mutagenicity                                                                       |
| A02737 | Acute Toxicity, Mutagenicity, Tumorigenicity, Skin and Eye Irritation, Multiple Dose Effects       |
| A02738 | Acute Toxicity, Mutagenicity, Tumorigenicity, Skin and Eye Irritation, Multiple Dose Effects       |
| A02739 | Acute Toxicity, Mutagenicity, Tumorigenicity, Skin and Eye Irritation,                             |
| A02740 | Acute Toxicity, Mutagenicity, Skin and Eye Irritation                                              |
| A02741 | Acute Toxicity, Mutagenicity, Tumorigenicity, Skin and Eye Irritation,                             |
| A02742 | Acute Toxicity, Mutagenicity                                                                       |
| A02743 | Acute Toxicity                                                                                     |
| A02744 | Acute Toxicity, Mutagenicity, Multiple Dose Effects                                                |
| A02745 | Acute Toxicity, Skin and Eye Irritation, Reproductive Effects, Multiple Dose                       |
| A02746 | Acute Toxicity, Mutagenicity, Skin and Eye Irritation                                              |
| A02747 | Acute Toxicity, Mutagenicity, Skin and Eye Irritation                                              |
| A02748 | Acute Toxicity, Skin and Eye Irritation, Multiple Dose Effects                                     |
| A02749 | Acute Toxicity, Mutagenicity, Skin and Eye Irritation, Multiple Dose Effects                       |
| A02750 | Acute Toxicity                                                                                     |
| A02751 | Acute Toxicity, Mutagenicity, Tumorigenicity, Skin and Eye Irritation, Multiple Dose Effects       |
| A02752 | Acute Toxicity, Mutagenicity, Tumorigenicity, Skin and Eye Irritation,                             |
| A02753 | Acute Toxicity, Mutagenicity, Tumorigenicity, Skin and Eye Irritation,                             |
| A02754 | Acute Toxicity, Skin and Eye Irritation, Reproductive Effects, Multiple Dose                       |
| A02755 | Acute Toxicity                                                                                     |
| A02756 | Acute Toxicity, Mutagenicity, Skin and Eye Irritation, Reproductive Effects, Multiple Dose Effects |
| A02757 | Acute Toxicity                                                                                     |
| A02758 | Acute Toxicity, Mutagenicity, Multiple Dose Effects                                                |
| A02759 | Acute Toxicity, Mutagenicity, Tumorigenicity                                                       |
| A02760 | Acute Toxicity, Mutagenicity, Skin and Eye Irritation, Multiple Dose Effects                       |
| A02761 | Acute Toxicity, Mutagenicity, Tumorigenicity, Skin and Eye Irritation,                             |
| A02762 | Acute Toxicity, Mutagenicity                                                                       |
| A02763 | Acute Toxicity, Mutagenicity                                                                       |
| A02764 | Acute Toxicity, Mutagenicity                                                                       |
| A02765 | Acute Toxicity                                                                                     |
| A02766 | Acute Toxicity                                                                                     |
| A02767 | Skin and Eye Irritation                                                                            |
| A02768 | Acute Toxicity, Mutagenicity, Skin and Eye Irritation                                              |
| A02769 | Acute Toxicity, Mutagenicity, Skin and Eye Irritation                                              |
| A02770 | Acute Toxicity, Multiple Dose Effects                                                              |



|        |                                                                                                       |
|--------|-------------------------------------------------------------------------------------------------------|
| A02771 | Acute Toxicity, Mutagenicity, Skin and Eye Irritation, Multiple Dose Effects                          |
| A02772 | Acute Toxicity, Mutagenicity, Tumorigenicity, Skin and Eye Irritation,                                |
| A02773 | Acute Toxicity, Mutagenicity                                                                          |
| A02774 | Acute Toxicity, Mutagenicity, Skin and Eye Irritation, Multiple Dose Effects                          |
| A02775 | Acute Toxicity                                                                                        |
| A02776 | Acute Toxicity                                                                                        |
| A02777 | Acute Toxicity, Tumorigenicity, Skin and Eye Irritation, Multiple Dose                                |
| A02778 | Acute Toxicity, Mutagenicity, Tumorigenicity, Skin and Eye Irritation,                                |
| A02779 | Acute Toxicity, Mutagenicity, Tumorigenicity, Skin and Eye Irritation,<br>Multiple Dose Effects       |
| A02780 | Acute Toxicity, Mutagenicity, Skin and Eye Irritation, Multiple Dose Effects                          |
| A02781 | Acute Toxicity, Skin and Eye Irritation                                                               |
| A02782 | Acute Toxicity                                                                                        |
| A02783 | Acute Toxicity, Skin and Eye Irritation, Multiple Dose Effects                                        |
| A02784 | Acute Toxicity, Mutagenicity, Skin and Eye Irritation                                                 |
| A02785 | Acute Toxicity, Mutagenicity, Tumorigenicity, Reproductive Effects,                                   |
| A02786 | Acute Toxicity, Mutagenicity, Skin and Eye Irritation, Reproductive Effects,<br>Multiple Dose Effects |
| A02787 | Acute Toxicity, Mutagenicity, Tumorigenicity, Skin and Eye Irritation,                                |
| A02788 | Acute Toxicity, Mutagenicity, Tumorigenicity, Skin and Eye Irritation,                                |
| A02789 | Acute Toxicity, Mutagenicity, Skin and Eye Irritation, Reproductive Effects,<br>Multiple Dose Effects |
| A02790 | Acute Toxicity, Mutagenicity, Skin and Eye Irritation, Multiple Dose Effects                          |
| A02791 | Acute Toxicity                                                                                        |
| A02792 | Acute Toxicity, Mutagenicity, Skin and Eye Irritation, Reproductive Effects                           |
| A02793 | Acute Toxicity                                                                                        |
| A02794 | Acute Toxicity                                                                                        |
| A02795 | Acute Toxicity, Mutagenicity                                                                          |
| A02796 | Acute Toxicity, Mutagenicity                                                                          |
| A02797 | Acute Toxicity, Mutagenicity                                                                          |
| A02798 | Acute Toxicity, Mutagenicity, Skin and Eye Irritation, Reproductive Effects,<br>Multiple Dose Effects |
| A02799 | Acute Toxicity, Mutagenicity, Skin and Eye Irritation                                                 |
| A02800 | Acute Toxicity, Mutagenicity, Skin and Eye Irritation                                                 |
| A02801 | Acute Toxicity, Skin and Eye Irritation                                                               |
| A02802 | Acute Toxicity, Mutagenicity, Skin and Eye Irritation, Reproductive Effects,<br>Multiple Dose Effects |
| A02803 | Acute Toxicity, Reproductive Effects                                                                  |
| A02804 | Acute Toxicity                                                                                        |
| A02805 | Acute Toxicity, Mutagenicity, Skin and Eye Irritation, Multiple Dose Effects                          |
| A02806 | Acute Toxicity, Reproductive Effects, Multiple Dose Effects                                           |
| A02807 | Acute Toxicity, Skin and Eye Irritation, Multiple Dose Effects                                        |
| A02808 | Acute Toxicity, Skin and Eye Irritation                                                               |
| A02809 | Acute Toxicity                                                                                        |
| A02810 | Acute Toxicity, Mutagenicity, Multiple Dose Effects                                                   |
| A02811 | Acute Toxicity, Mutagenicity                                                                          |

|        |                                                                                                       |
|--------|-------------------------------------------------------------------------------------------------------|
| A02812 | Acute Toxicity, Multiple Dose Effects                                                                 |
| A02813 | Acute Toxicity, Multiple Dose Effects                                                                 |
| A02814 | Acute Toxicity, Mutagenicity, Tumorigenicity, Reproductive Effects,                                   |
| A02815 | Acute Toxicity, Mutagenicity                                                                          |
| A02816 | Acute Toxicity, Mutagenicity, Tumorigenicity, Skin and Eye Irritation,                                |
| A02817 | Acute Toxicity, Skin and Eye Irritation, Reproductive Effects                                         |
| A02818 | Acute Toxicity, Skin and Eye Irritation, Reproductive Effects, Multiple Dose                          |
| A02819 | Acute Toxicity, Mutagenicity, Skin and Eye Irritation, Multiple Dose Effects                          |
| A02820 | Acute Toxicity, Mutagenicity, Skin and Eye Irritation, Multiple Dose Effects                          |
| A02821 | Acute Toxicity, Skin and Eye Irritation, Reproductive Effects, Multiple Dose                          |
| A02822 | Acute Toxicity                                                                                        |
| A02823 | Acute Toxicity                                                                                        |
| A02824 | Acute Toxicity                                                                                        |
| A02825 | Acute Toxicity, Mutagenicity, Skin and Eye Irritation                                                 |
| A02826 | Acute Toxicity, Mutagenicity, Tumorigenicity                                                          |
| A02827 | Acute Toxicity, Skin and Eye Irritation                                                               |
| A02828 | Acute Toxicity, Mutagenicity, Skin and Eye Irritation, Reproductive Effects,<br>Multiple Dose Effects |
| A02829 | Acute Toxicity, Skin and Eye Irritation, Multiple Dose Effects                                        |
| A02830 | Acute Toxicity, Mutagenicity, Skin and Eye Irritation, Multiple Dose Effects                          |
| A02831 | Acute Toxicity, Mutagenicity                                                                          |
| A02832 | Acute Toxicity, Mutagenicity, Skin and Eye Irritation                                                 |
| A02833 | Acute Toxicity, Mutagenicity                                                                          |
| A02834 | Acute Toxicity, Tumorigenicity, Skin and Eye Irritation, Multiple Dose                                |
| A02835 | Acute Toxicity                                                                                        |
| A02836 | Acute Toxicity, Mutagenicity                                                                          |
| A02837 | Acute Toxicity, Mutagenicity, Tumorigenicity, Reproductive Effects,                                   |
| A02838 | Acute Toxicity, Mutagenicity, Tumorigenicity, Reproductive Effects,                                   |
| A02839 | Acute Toxicity, Mutagenicity, Tumorigenicity, Skin and Eye Irritation,                                |
| A02840 | Acute Toxicity, Skin and Eye Irritation, Multiple Dose Effects                                        |
| A02841 | Acute Toxicity, Mutagenicity, Skin and Eye Irritation, Reproductive Effects,<br>Multiple Dose Effects |
| A02842 | Acute Toxicity, Mutagenicity, Skin and Eye Irritation, Multiple Dose Effects                          |
| A02843 | Acute Toxicity, Skin and Eye Irritation                                                               |
| A02844 | Acute Toxicity, Mutagenicity                                                                          |
| A02845 | Tumorigenicity, Skin and Eye Irritation                                                               |
| A02846 | Acute Toxicity, Mutagenicity, Skin and Eye Irritation, Reproductive Effects,<br>Multiple Dose Effects |
| A02847 | Acute Toxicity, Skin and Eye Irritation                                                               |
| A02848 | Mutagenicity, Skin and Eye Irritation                                                                 |
| A02849 | Acute Toxicity                                                                                        |
| A02850 | Acute Toxicity, Skin and Eye Irritation                                                               |
| A02851 | Skin and Eye Irritation                                                                               |
| A02852 | Acute Toxicity, Skin and Eye Irritation                                                               |
| A02853 | Acute Toxicity, Tumorigenicity                                                                        |

|        |                                                                                                    |
|--------|----------------------------------------------------------------------------------------------------|
| A02854 | Acute Toxicity, Mutagenicity, Skin and Eye Irritation, Reproductive Effects, Multiple Dose Effects |
| A02855 | Acute Toxicity, Mutagenicity, Multiple Dose Effects                                                |
| A02856 | Acute Toxicity, Mutagenicity, Skin and Eye Irritation, Reproductive Effects                        |
| A02857 | Acute Toxicity, Mutagenicity                                                                       |
| A02858 | Acute Toxicity                                                                                     |
| A02859 | Acute Toxicity, Mutagenicity, Tumorigenicity, Skin and Eye Irritation,                             |
| A02860 | Acute Toxicity, Mutagenicity, Skin and Eye Irritation                                              |
| A02861 | Acute Toxicity, Mutagenicity, Multiple Dose Effects                                                |
| A02862 | Acute Toxicity, Mutagenicity, Reproductive Effects                                                 |
| A02863 | Acute Toxicity, Mutagenicity, Skin and Eye Irritation                                              |
| A02864 | Acute Toxicity, Mutagenicity, Multiple Dose Effects                                                |
| A02865 | Acute Toxicity, Skin and Eye Irritation, Reproductive Effects, Multiple Dose                       |
| A02866 | Acute Toxicity                                                                                     |
| A02867 | Acute Toxicity, Skin and Eye Irritation                                                            |
| A02868 | Acute Toxicity                                                                                     |
| A02869 | Acute Toxicity, Skin and Eye Irritation, Reproductive Effects, Multiple Dose                       |
| A02870 | Acute Toxicity                                                                                     |
| A02871 | Skin and Eye Irritation                                                                            |
| A02872 | Acute Toxicity, Mutagenicity, Skin and Eye Irritation, Reproductive Effects, Multiple Dose Effects |
| A02873 | Acute Toxicity, Skin and Eye Irritation, Multiple Dose Effects                                     |
| A02874 | Acute Toxicity, Mutagenicity, Tumorigenicity, Skin and Eye Irritation,                             |
| A02875 | Acute Toxicity, Mutagenicity, Multiple Dose Effects                                                |
| A02876 | Acute Toxicity, Mutagenicity, Reproductive Effects, Multiple Dose Effects                          |
| A02877 | Acute Toxicity, Mutagenicity, Tumorigenicity, Skin and Eye Irritation,                             |
| A02878 | Acute Toxicity, Mutagenicity, Tumorigenicity, Skin and Eye Irritation, Multiple Dose Effects       |
| A02879 | Acute Toxicity, Multiple Dose Effects                                                              |
| A02880 | Acute Toxicity, Mutagenicity                                                                       |
| A02881 | Acute Toxicity, Mutagenicity, Tumorigenicity, Skin and Eye Irritation, Multiple Dose Effects       |
| A02882 | Acute Toxicity                                                                                     |
| A02883 | Skin and Eye Irritation                                                                            |
| A02884 | Acute Toxicity                                                                                     |
| A02885 | Acute Toxicity, Skin and Eye Irritation                                                            |
| A02886 | Acute Toxicity, Skin and Eye Irritation, Reproductive Effects                                      |
| A02887 | Acute Toxicity, Mutagenicity, Reproductive Effects, Multiple Dose Effects                          |
| A02888 | Acute Toxicity, Mutagenicity, Skin and Eye Irritation, Reproductive Effects, Multiple Dose Effects |
| A02889 | Acute Toxicity, Tumorigenicity, Skin and Eye Irritation                                            |
| A02890 | Acute Toxicity, Skin and Eye Irritation                                                            |
| A02891 | Acute Toxicity, Skin and Eye Irritation, Reproductive Effects                                      |
| A02892 | Acute Toxicity, Multiple Dose Effects                                                              |
| A02893 | Mutagenicity                                                                                       |
| A02894 | Acute Toxicity                                                                                     |

|        |                                                                                                    |
|--------|----------------------------------------------------------------------------------------------------|
| A02895 | Acute Toxicity, Skin and Eye Irritation                                                            |
| A02896 | Acute Toxicity, Mutagenicity, Skin and Eye Irritation, Reproductive Effects, Multiple Dose Effects |
| A02897 | Acute Toxicity, Skin and Eye Irritation                                                            |
| A02898 | Acute Toxicity                                                                                     |
| A02899 | Acute Toxicity, Skin and Eye Irritation, Multiple Dose Effects                                     |
| A02900 | Acute Toxicity, Skin and Eye Irritation, Reproductive Effects                                      |
| A02901 | Acute Toxicity, Multiple Dose Effects                                                              |
| A02902 | Acute Toxicity, Mutagenicity, Skin and Eye Irritation, Multiple Dose Effects                       |
| A02903 | Acute Toxicity, Mutagenicity, Skin and Eye Irritation, Reproductive Effects, Multiple Dose Effects |
| A02904 | Acute Toxicity, Mutagenicity, Tumorigenicity, Skin and Eye Irritation,                             |
| A02905 | Acute Toxicity                                                                                     |
| A02906 | Acute Toxicity, Mutagenicity, Tumorigenicity, Skin and Eye Irritation, Multiple Dose Effects       |
| A02907 | Acute Toxicity, Skin and Eye Irritation, Multiple Dose Effects                                     |
| A02908 | Acute Toxicity, Mutagenicity, Tumorigenicity, Skin and Eye Irritation,                             |
| A02909 | Tumorigenicity                                                                                     |
| A02910 | Acute Toxicity, Mutagenicity, Skin and Eye Irritation                                              |
| A02911 | Acute Toxicity, Skin and Eye Irritation, Multiple Dose Effects                                     |
| A02912 | Acute Toxicity, Skin and Eye Irritation                                                            |
| A02913 | Mutagenicity                                                                                       |
| A02914 | Acute Toxicity, Tumorigenicity                                                                     |
| A02915 | Acute Toxicity, Mutagenicity, Skin and Eye Irritation, Reproductive Effects, Multiple Dose Effects |
| A02916 | Acute Toxicity, Mutagenicity, Multiple Dose Effects                                                |
| A02917 | Acute Toxicity, Mutagenicity, Skin and Eye Irritation, Multiple Dose Effects                       |
| A02918 | Acute Toxicity, Mutagenicity, Tumorigenicity, Skin and Eye Irritation,                             |
| A02919 | Acute Toxicity, Skin and Eye Irritation, Reproductive Effects, Multiple Dose                       |
| A02920 | Acute Toxicity, Skin and Eye Irritation                                                            |
| A02921 | Acute Toxicity, Mutagenicity                                                                       |
| A02922 | Acute Toxicity, Mutagenicity, Skin and Eye Irritation, Multiple Dose Effects                       |
| A02923 | Mutagenicity                                                                                       |
| A02924 | Acute Toxicity, Skin and Eye Irritation                                                            |
| A02925 | Acute Toxicity, Mutagenicity, Skin and Eye Irritation, Reproductive Effects, Multiple Dose Effects |
| A02926 | Acute Toxicity, Skin and Eye Irritation, Multiple Dose Effects                                     |
| A02927 | Acute Toxicity, Mutagenicity, Skin and Eye Irritation, Multiple Dose Effects                       |
| A02928 | Acute Toxicity, Mutagenicity, Skin and Eye Irritation, Reproductive Effects, Multiple Dose Effects |
| A02929 | Acute Toxicity, Mutagenicity, Reproductive Effects, Multiple Dose Effects                          |
| A02930 | Acute Toxicity                                                                                     |
| A02931 | Acute Toxicity, Mutagenicity, Skin and Eye Irritation, Reproductive Effects, Multiple Dose Effects |
| A02932 | Acute Toxicity, Skin and Eye Irritation                                                            |
| A02933 | Acute Toxicity, Skin and Eye Irritation, Multiple Dose Effects                                     |

|        |                                                                                                    |
|--------|----------------------------------------------------------------------------------------------------|
| A02934 | Acute Toxicity, Skin and Eye Irritation                                                            |
| A02935 | Acute Toxicity, Reproductive Effects                                                               |
| A02936 | Acute Toxicity, Skin and Eye Irritation                                                            |
| A02937 | Acute Toxicity, Skin and Eye Irritation, Multiple Dose Effects                                     |
| A02938 | Acute Toxicity                                                                                     |
| A02939 | Skin and Eye Irritation                                                                            |
| A02940 | Skin and Eye Irritation                                                                            |
| A02941 | Acute Toxicity, Skin and Eye Irritation, Multiple Dose Effects                                     |
| A02942 | Acute Toxicity, Mutagenicity, Tumorigenicity, Skin and Eye Irritation,                             |
| A02943 | Acute Toxicity                                                                                     |
| A02944 | Acute Toxicity, Mutagenicity, Tumorigenicity, Skin and Eye Irritation,                             |
| A02945 | Acute Toxicity, Mutagenicity, Skin and Eye Irritation                                              |
| A02946 | Acute Toxicity, Skin and Eye Irritation                                                            |
| A02947 | Acute Toxicity, Mutagenicity, Skin and Eye Irritation, Multiple Dose Effects                       |
| A02948 | Acute Toxicity, Mutagenicity, Skin and Eye Irritation, Reproductive Effects, Multiple Dose Effects |
| A02949 | Acute Toxicity, Skin and Eye Irritation, Reproductive Effects, Multiple Dose                       |
| A02950 | Acute Toxicity, Skin and Eye Irritation                                                            |
| A02951 | Acute Toxicity, Tumorigenicity, Skin and Eye Irritation, Multiple Dose                             |
| A02952 | Acute Toxicity                                                                                     |
| A02953 | Acute Toxicity, Mutagenicity, Skin and Eye Irritation                                              |
| A02954 | Acute Toxicity, Skin and Eye Irritation                                                            |
| A02955 | Skin and Eye Irritation                                                                            |
| A02956 | Acute Toxicity, Skin and Eye Irritation                                                            |
| A02957 | Acute Toxicity, Skin and Eye Irritation                                                            |
| A02958 | Acute Toxicity, Mutagenicity, Reproductive Effects, Multiple Dose Effects                          |
| A02959 | Acute Toxicity, Skin and Eye Irritation, Multiple Dose Effects                                     |
| A02960 | Mutagenicity                                                                                       |
| A02961 | Acute Toxicity, Mutagenicity, Tumorigenicity, Skin and Eye Irritation                              |
| A02962 | Acute Toxicity, Skin and Eye Irritation                                                            |
| A02963 | Mutagenicity, Skin and Eye Irritation                                                              |
| A02964 | Acute Toxicity, Mutagenicity, Multiple Dose Effects                                                |
| A02965 | Acute Toxicity, Mutagenicity, Skin and Eye Irritation                                              |
| A02966 | Acute Toxicity, Mutagenicity, Skin and Eye Irritation                                              |
| A02967 | Acute Toxicity, Mutagenicity, Skin and Eye Irritation, Multiple Dose Effects                       |
| A02968 | Acute Toxicity, Mutagenicity, Skin and Eye Irritation, Reproductive Effects, Multiple Dose Effects |
| A02969 | Tumorigenicity                                                                                     |
| A02970 | Skin and Eye Irritation                                                                            |
| A02971 | Acute Toxicity, Mutagenicity, Skin and Eye Irritation                                              |
| A02972 | Acute Toxicity, Tumorigenicity, Skin and Eye Irritation                                            |
| A02973 | Acute Toxicity, Skin and Eye Irritation, Reproductive Effects, Multiple Dose                       |
| A02974 | Acute Toxicity                                                                                     |
| A02975 | Non-toxicity                                                                                       |
| A02976 | Acute Toxicity, Mutagenicity, Tumorigenicity, Skin and Eye Irritation                              |
| A02977 | Mutagenicity, Tumorigenicity                                                                       |

|        |                                                                                              |
|--------|----------------------------------------------------------------------------------------------|
| A02978 | Acute Toxicity, Multiple Dose Effects                                                        |
| A02979 | Acute Toxicity, Mutagenicity, Tumorigenicity, Reproductive Effects                           |
| A02980 | Acute Toxicity, Reproductive Effects                                                         |
| A02981 | Acute Toxicity, Mutagenicity, Tumorigenicity, Skin and Eye Irritation, Multiple Dose Effects |
| A02982 | Acute Toxicity, Mutagenicity, Tumorigenicity, Multiple Dose Effects                          |
| A02983 | Acute Toxicity, Reproductive Effects, Multiple Dose Effects                                  |
| A02984 | Acute Toxicity, Mutagenicity, Tumorigenicity, Multiple Dose Effects                          |
| A02985 | Acute Toxicity                                                                               |
| A02986 | Acute Toxicity, Reproductive Effects, Multiple Dose Effects                                  |
| A02987 | Acute Toxicity                                                                               |
| A02988 | Acute Toxicity, Mutagenicity, Tumorigenicity, Multiple Dose Effects                          |
| A02989 | Acute Toxicity                                                                               |
| A02990 | Acute Toxicity, Mutagenicity, Multiple Dose Effects                                          |
| A02991 | Acute Toxicity, Multiple Dose Effects                                                        |
| A02992 | Acute Toxicity, Mutagenicity, Tumorigenicity, Reproductive Effects,                          |
| A02993 | Acute Toxicity                                                                               |
| A02994 | Acute Toxicity, Reproductive Effects                                                         |
| A02995 | Mutagenicity                                                                                 |
| A02996 | Acute Toxicity                                                                               |
| A02997 | Acute Toxicity                                                                               |
| A02998 | Acute Toxicity                                                                               |
| A02999 | Acute Toxicity, Reproductive Effects                                                         |
| A03000 | Acute Toxicity, Skin and Eye Irritation                                                      |
| A03001 | Acute Toxicity, Mutagenicity, Multiple Dose Effects                                          |
| A03002 | Acute Toxicity                                                                               |
| A03003 | Acute Toxicity, Mutagenicity, Skin and Eye Irritation, Multiple Dose Effects                 |
| A03004 | Acute Toxicity, Mutagenicity, Multiple Dose Effects                                          |
| A03005 | Acute Toxicity                                                                               |
| A03006 | Acute Toxicity, Mutagenicity, Skin and Eye Irritation, Multiple Dose Effects                 |
| A03007 | Acute Toxicity, Mutagenicity, Tumorigenicity, Reproductive Effects,                          |
| A03008 | Acute Toxicity, Multiple Dose Effects                                                        |
| A03009 | Acute Toxicity, Skin and Eye Irritation                                                      |
| A03010 | Acute Toxicity, Mutagenicity                                                                 |
| A03011 | Acute Toxicity                                                                               |
| A03012 | Acute Toxicity, Tumorigenicity, Reproductive Effects, Multiple Dose Effects                  |
| A03013 | Acute Toxicity, Multiple Dose Effects                                                        |
| A03014 | Acute Toxicity, Mutagenicity, Reproductive Effects, Multiple Dose Effects                    |
| A03015 | Acute Toxicity, Mutagenicity                                                                 |
| A03016 | Acute Toxicity, Mutagenicity, Tumorigenicity, Reproductive Effects,                          |
| A03017 | Acute Toxicity, Multiple Dose Effects                                                        |
| A03018 | Acute Toxicity, Mutagenicity, Skin and Eye Irritation, Multiple Dose Effects                 |
| A03019 | Acute Toxicity                                                                               |
| A03020 | Acute Toxicity, Mutagenicity                                                                 |
| A03021 | Mutagenicity                                                                                 |
| A03022 | Acute Toxicity, Multiple Dose Effects                                                        |

|        |                                                                                                    |
|--------|----------------------------------------------------------------------------------------------------|
| A03023 | Acute Toxicity, Mutagenicity                                                                       |
| A03024 | Acute Toxicity, Mutagenicity, Skin and Eye Irritation, Reproductive Effects, Multiple Dose Effects |
| A03025 | Mutagenicity, Skin and Eye Irritation                                                              |
| A03026 | Acute Toxicity, Multiple Dose Effects                                                              |
| A03027 | Acute Toxicity, Mutagenicity                                                                       |
| A03028 | Acute Toxicity                                                                                     |
| A03029 | Acute Toxicity, Skin and Eye Irritation, Multiple Dose Effects                                     |
| A03030 | Acute Toxicity                                                                                     |
| A03031 | Acute Toxicity, Multiple Dose Effects                                                              |
| A03032 | Acute Toxicity, Mutagenicity, Tumorigenicity, Multiple Dose Effects                                |
| A03033 | Acute Toxicity, Mutagenicity, Tumorigenicity, Skin and Eye Irritation, Multiple Dose Effects       |
| A03034 | Acute Toxicity, Mutagenicity, Tumorigenicity, Skin and Eye Irritation,                             |
| A03035 | Acute Toxicity, Mutagenicity, Skin and Eye Irritation, Reproductive Effects, Multiple Dose Effects |
| A03036 | Acute Toxicity, Mutagenicity, Skin and Eye Irritation, Reproductive Effects, Multiple Dose Effects |
| A03037 | Acute Toxicity, Skin and Eye Irritation                                                            |
| A03038 | Acute Toxicity, Mutagenicity                                                                       |
| A03039 | Reproductive Effects                                                                               |
| A03040 | Acute Toxicity                                                                                     |
| A03041 | Reproductive Effects                                                                               |
| A03042 | Acute Toxicity, Mutagenicity, Skin and Eye Irritation, Multiple Dose Effects                       |
| A03043 | Acute Toxicity, Mutagenicity, Skin and Eye Irritation, Reproductive Effects                        |
| A03044 | Mutagenicity                                                                                       |
| A03045 | Acute Toxicity, Mutagenicity, Skin and Eye Irritation                                              |
| A03046 | Acute Toxicity, Skin and Eye Irritation                                                            |
| A03047 | Acute Toxicity, Skin and Eye Irritation                                                            |
| A03048 | Acute Toxicity, Multiple Dose Effects                                                              |
| A03049 | Acute Toxicity, Mutagenicity, Tumorigenicity, Skin and Eye Irritation, Multiple Dose Effects       |
| A03050 | Acute Toxicity, Mutagenicity, Tumorigenicity, Reproductive Effects,                                |
| A03051 | Acute Toxicity, Mutagenicity, Tumorigenicity, Multiple Dose Effects                                |
| A03052 | Acute Toxicity, Mutagenicity, Tumorigenicity, Multiple Dose Effects                                |
| A03053 | Acute Toxicity                                                                                     |
| A03054 | Acute Toxicity, Mutagenicity, Skin and Eye Irritation                                              |
| A03055 | Acute Toxicity                                                                                     |
| A03056 | Acute Toxicity, Mutagenicity, Skin and Eye Irritation, Reproductive Effects, Multiple Dose Effects |
| A03057 | Acute Toxicity, Skin and Eye Irritation                                                            |
| A03058 | Acute Toxicity, Mutagenicity, Skin and Eye Irritation, Multiple Dose Effects                       |
| A03059 | Acute Toxicity, Multiple Dose Effects                                                              |
| A03060 | Acute Toxicity, Mutagenicity, Skin and Eye Irritation, Multiple Dose Effects                       |
| A03061 | Acute Toxicity                                                                                     |
| A03062 | Acute Toxicity, Mutagenicity                                                                       |

|        |                                                                                                    |
|--------|----------------------------------------------------------------------------------------------------|
| A03063 | Acute Toxicity                                                                                     |
| A03064 | Acute Toxicity, Mutagenicity, Tumorigenicity, Skin and Eye Irritation                              |
| A03065 | Acute Toxicity, Mutagenicity                                                                       |
| A03066 | Acute Toxicity, Mutagenicity                                                                       |
| A03067 | Acute Toxicity, Mutagenicity, Skin and Eye Irritation, Reproductive Effects, Multiple Dose Effects |
| A03068 | Acute Toxicity, Mutagenicity, Tumorigenicity, Skin and Eye Irritation, Multiple Dose Effects       |
| A03069 | Acute Toxicity, Mutagenicity, Skin and Eye Irritation                                              |
| A03070 | Acute Toxicity, Mutagenicity, Skin and Eye Irritation                                              |
| A03071 | Acute Toxicity                                                                                     |
| A03072 | Mutagenicity                                                                                       |
| A03073 | Acute Toxicity, Skin and Eye Irritation                                                            |
| A03074 | Acute Toxicity                                                                                     |
| A03075 | Acute Toxicity, Skin and Eye Irritation                                                            |
| A03076 | Acute Toxicity, Mutagenicity, Tumorigenicity                                                       |
| A03077 | Acute Toxicity, Mutagenicity, Tumorigenicity                                                       |
| A03078 | Acute Toxicity, Skin and Eye Irritation, Multiple Dose Effects                                     |
| A03079 | Acute Toxicity, Reproductive Effects, Multiple Dose Effects                                        |
| A03080 | Acute Toxicity, Mutagenicity, Tumorigenicity, Skin and Eye Irritation, Multiple Dose Effects       |
| A03081 | Acute Toxicity, Mutagenicity, Skin and Eye Irritation                                              |
| A03082 | Acute Toxicity                                                                                     |
| A03083 | Acute Toxicity                                                                                     |
| A03084 | Acute Toxicity, Mutagenicity                                                                       |
| A03085 | Acute Toxicity                                                                                     |
| A03086 | Acute Toxicity, Mutagenicity, Tumorigenicity, Skin and Eye Irritation, Multiple Dose Effects       |
| A03087 | Acute Toxicity, Mutagenicity, Tumorigenicity, Reproductive Effects,                                |
| A03088 | Mutagenicity                                                                                       |
| A03089 | Acute Toxicity, Mutagenicity, Tumorigenicity, Skin and Eye Irritation, Multiple Dose Effects       |
| A03090 | Acute Toxicity, Tumorigenicity, Multiple Dose Effects                                              |
| A03091 | Acute Toxicity, Mutagenicity, Skin and Eye Irritation, Reproductive Effects, Multiple Dose Effects |
| A03092 | Acute Toxicity, Skin and Eye Irritation, Multiple Dose Effects                                     |
| A03093 | Acute Toxicity, Mutagenicity, Skin and Eye Irritation, Multiple Dose Effects                       |
| A03094 | Acute Toxicity, Mutagenicity, Tumorigenicity, Skin and Eye Irritation,                             |
| A03095 | Acute Toxicity, Mutagenicity, Tumorigenicity, Reproductive Effects                                 |
| A03096 | Acute Toxicity, Mutagenicity                                                                       |
| A03097 | Acute Toxicity, Mutagenicity, Tumorigenicity, Skin and Eye Irritation, Multiple Dose Effects       |
| A03098 | Acute Toxicity, Mutagenicity, Tumorigenicity, Skin and Eye Irritation,                             |
| A03099 | Acute Toxicity, Mutagenicity, Tumorigenicity, Skin and Eye Irritation,                             |
| A03100 | Acute Toxicity, Skin and Eye Irritation, Multiple Dose Effects                                     |
| A03101 | Acute Toxicity, Tumorigenicity, Reproductive Effects                                               |



|        |                                                                                                       |
|--------|-------------------------------------------------------------------------------------------------------|
| A03102 | Acute Toxicity                                                                                        |
| A03103 | Acute Toxicity, Skin and Eye Irritation                                                               |
| A03104 | Acute Toxicity, Mutagenicity, Tumorigenicity, Skin and Eye Irritation,                                |
| A03105 | Acute Toxicity, Skin and Eye Irritation                                                               |
| A03106 | Acute Toxicity                                                                                        |
| A03107 | Acute Toxicity, Mutagenicity, Tumorigenicity, Skin and Eye Irritation,                                |
| A03108 | Acute Toxicity, Mutagenicity, Skin and Eye Irritation, Multiple Dose Effects                          |
| A03109 | Acute Toxicity, Mutagenicity, Skin and Eye Irritation, Multiple Dose Effects                          |
| A03110 | Acute Toxicity, Mutagenicity                                                                          |
| A03111 | Acute Toxicity, Mutagenicity                                                                          |
| A03112 | Acute Toxicity, Mutagenicity, Skin and Eye Irritation, Multiple Dose Effects                          |
| A03113 | Acute Toxicity, Mutagenicity, Tumorigenicity, Skin and Eye Irritation,                                |
| A03114 | Mutagenicity, Skin and Eye Irritation                                                                 |
| A03115 | Acute Toxicity, Mutagenicity, Skin and Eye Irritation                                                 |
| A03116 | Acute Toxicity, Mutagenicity                                                                          |
| A03117 | Mutagenicity                                                                                          |
| A03118 | Acute Toxicity, Skin and Eye Irritation                                                               |
| A03119 | Acute Toxicity, Mutagenicity, Tumorigenicity, Reproductive Effects                                    |
| A03120 | Acute Toxicity, Mutagenicity, Multiple Dose Effects                                                   |
| A03121 | Acute Toxicity, Mutagenicity, Skin and Eye Irritation, Reproductive Effects,<br>Multiple Dose Effects |
| A03122 | Skin and Eye Irritation                                                                               |
| A03123 | Acute Toxicity, Mutagenicity                                                                          |
| A03124 | Acute Toxicity, Mutagenicity, Skin and Eye Irritation                                                 |
| A03125 | Acute Toxicity, Mutagenicity                                                                          |
| A03126 | Acute Toxicity, Mutagenicity, Tumorigenicity, Skin and Eye Irritation,<br>Multiple Dose Effects       |
| A03127 | Acute Toxicity, Mutagenicity, Reproductive Effects, Multiple Dose Effects                             |
| A03128 | Acute Toxicity, Skin and Eye Irritation                                                               |
| A03129 | Acute Toxicity, Skin and Eye Irritation                                                               |
| A03130 | Mutagenicity, Multiple Dose Effects                                                                   |
| A03131 | Acute Toxicity, Mutagenicity, Reproductive Effects, Multiple Dose Effects                             |
| A03132 | Acute Toxicity                                                                                        |
| A03133 | Skin and Eye Irritation                                                                               |
| A03134 | Mutagenicity, Tumorigenicity, Skin and Eye Irritation, Reproductive Effects,<br>Multiple Dose Effects |
| A03135 | Acute Toxicity, Mutagenicity, Skin and Eye Irritation, Multiple Dose Effects                          |
| A03136 | Acute Toxicity, Multiple Dose Effects                                                                 |
| A03137 | Mutagenicity                                                                                          |
| A03138 | Acute Toxicity, Mutagenicity, Tumorigenicity, Skin and Eye Irritation,<br>Multiple Dose Effects       |
| A03139 | Acute Toxicity, Multiple Dose Effects                                                                 |
| A03140 | Acute Toxicity                                                                                        |
| A03141 | Acute Toxicity, Mutagenicity, Tumorigenicity, Reproductive Effects,                                   |
| A03142 | Acute Toxicity, Skin and Eye Irritation                                                               |
| A03143 | Acute Toxicity, Tumorigenicity, Reproductive Effects, Multiple Dose Effects                           |

|        |                                                                                                    |
|--------|----------------------------------------------------------------------------------------------------|
| A03144 | Acute Toxicity, Mutagenicity, Skin and Eye Irritation, Reproductive Effects, Multiple Dose Effects |
| A03145 | Mutagenicity, Skin and Eye Irritation                                                              |
| A03146 | Acute Toxicity, Reproductive Effects, Multiple Dose Effects                                        |
| A03147 | Acute Toxicity, Mutagenicity, Tumorigenicity, Skin and Eye Irritation,                             |
| A03148 | Acute Toxicity, Reproductive Effects, Multiple Dose Effects                                        |
| A03149 | Acute Toxicity, Skin and Eye Irritation                                                            |
| A03150 | Acute Toxicity                                                                                     |
| A03151 | Acute Toxicity, Skin and Eye Irritation                                                            |
| A03152 | Mutagenicity                                                                                       |
| A03153 | Acute Toxicity, Mutagenicity                                                                       |
| A03154 | Acute Toxicity, Mutagenicity, Skin and Eye Irritation, Multiple Dose Effects                       |
| A03155 | Acute Toxicity, Skin and Eye Irritation, Multiple Dose Effects                                     |
| A03156 | Acute Toxicity, Skin and Eye Irritation, Reproductive Effects, Multiple Dose                       |
| A03157 | Acute Toxicity, Mutagenicity, Tumorigenicity                                                       |
| A03158 | Acute Toxicity, Mutagenicity                                                                       |
| A03159 | Acute Toxicity, Mutagenicity, Multiple Dose Effects                                                |
| A03160 | Acute Toxicity, Mutagenicity, Tumorigenicity                                                       |
| A03161 | Acute Toxicity                                                                                     |
| A03162 | Acute Toxicity, Tumorigenicity                                                                     |
| A03163 | Acute Toxicity, Multiple Dose Effects                                                              |
| A03164 | Acute Toxicity, Mutagenicity                                                                       |
| A03165 | Acute Toxicity, Mutagenicity                                                                       |
| A03166 | Acute Toxicity                                                                                     |
| A03167 | Acute Toxicity, Mutagenicity, Tumorigenicity, Skin and Eye Irritation,                             |
| A03168 | Acute Toxicity, Mutagenicity, Tumorigenicity, Skin and Eye Irritation,                             |
| A03169 | Acute Toxicity                                                                                     |
| A03170 | Acute Toxicity                                                                                     |
| A03171 | Acute Toxicity, Mutagenicity, Multiple Dose Effects                                                |
| A03172 | Acute Toxicity, Skin and Eye Irritation                                                            |
| A03173 | Skin and Eye Irritation                                                                            |
| A03174 | Acute Toxicity, Mutagenicity, Tumorigenicity, Multiple Dose Effects                                |
| A03175 | Acute Toxicity                                                                                     |
| A03176 | Mutagenicity                                                                                       |
| A03177 | Acute Toxicity, Mutagenicity, Skin and Eye Irritation, Reproductive Effects                        |
| A03178 | Acute Toxicity, Mutagenicity, Tumorigenicity                                                       |
| A03179 | Acute Toxicity                                                                                     |
| A03180 | Acute Toxicity                                                                                     |
| A03181 | Acute Toxicity, Mutagenicity, Skin and Eye Irritation                                              |
| A03182 | Acute Toxicity                                                                                     |
| A03183 | Acute Toxicity                                                                                     |
| A03184 | Acute Toxicity, Reproductive Effects, Multiple Dose Effects                                        |
| A03185 | Acute Toxicity, Mutagenicity, Skin and Eye Irritation                                              |
| A03186 | Acute Toxicity, Mutagenicity, Multiple Dose Effects                                                |
| A03187 | Acute Toxicity                                                                                     |
| A03188 | Acute Toxicity, Mutagenicity, Tumorigenicity, Skin and Eye Irritation,                             |

|        |                                                                                                    |
|--------|----------------------------------------------------------------------------------------------------|
| A03189 | Acute Toxicity, Skin and Eye Irritation, Multiple Dose Effects                                     |
| A03190 | Acute Toxicity                                                                                     |
| A03191 | Acute Toxicity, Multiple Dose Effects                                                              |
| A03192 | Acute Toxicity, Skin and Eye Irritation                                                            |
| A03193 | Skin and Eye Irritation                                                                            |
| A03194 | Acute Toxicity                                                                                     |
| A03195 | Acute Toxicity, Mutagenicity, Skin and Eye Irritation, Reproductive Effects, Multiple Dose Effects |
| A03196 | Acute Toxicity, Skin and Eye Irritation                                                            |
| A03197 | Acute Toxicity, Mutagenicity                                                                       |
| A03198 | Acute Toxicity                                                                                     |
| A03199 | Acute Toxicity, Mutagenicity, Skin and Eye Irritation, Reproductive Effects, Multiple Dose Effects |
| A03200 | Acute Toxicity                                                                                     |
| A03201 | Acute Toxicity, Mutagenicity                                                                       |
| A03202 | Mutagenicity, Tumorigenicity                                                                       |
| A03203 | Acute Toxicity, Mutagenicity                                                                       |
| A03204 | Acute Toxicity, Mutagenicity, Skin and Eye Irritation                                              |
| A03205 | Non-toxicity                                                                                       |
| A03206 | Acute Toxicity, Skin and Eye Irritation                                                            |
| A03207 | Acute Toxicity, Mutagenicity                                                                       |
| A03208 | Mutagenicity                                                                                       |
| A03209 | Acute Toxicity, Mutagenicity, Tumorigenicity                                                       |
| A03210 | Mutagenicity                                                                                       |
| A03211 | Acute Toxicity, Mutagenicity, Tumorigenicity                                                       |
| A03212 | Acute Toxicity, Skin and Eye Irritation                                                            |
| A03213 | Acute Toxicity, Mutagenicity, Tumorigenicity, Multiple Dose Effects                                |
| A03214 | Acute Toxicity                                                                                     |
| A03215 | Acute Toxicity                                                                                     |
| A03216 | Mutagenicity, Skin and Eye Irritation                                                              |
| A03217 | Acute Toxicity, Mutagenicity, Tumorigenicity, Reproductive Effects                                 |
| A03218 | Acute Toxicity, Skin and Eye Irritation, Multiple Dose Effects                                     |
| A03219 | Acute Toxicity                                                                                     |
| A03220 | Acute Toxicity                                                                                     |
| A03221 | Acute Toxicity, Mutagenicity, Tumorigenicity                                                       |
| A03222 | Skin and Eye Irritation                                                                            |
| A03223 | Acute Toxicity, Skin and Eye Irritation                                                            |
| A03224 | Acute Toxicity, Mutagenicity, Tumorigenicity, Skin and Eye Irritation, Multiple Dose Effects       |
| A03225 | Acute Toxicity                                                                                     |
| A03226 | Acute Toxicity, Mutagenicity                                                                       |
| A03227 | Acute Toxicity                                                                                     |
| A03228 | Acute Toxicity, Mutagenicity, Skin and Eye Irritation, Multiple Dose Effects                       |
| A03229 | Acute Toxicity, Mutagenicity, Skin and Eye Irritation, Reproductive Effects                        |
| A03230 | Mutagenicity                                                                                       |
| A03231 | Acute Toxicity                                                                                     |

|        |                                                                                                 |
|--------|-------------------------------------------------------------------------------------------------|
| A03232 | Acute Toxicity, Mutagenicity                                                                    |
| A03233 | Acute Toxicity                                                                                  |
| A03234 | Acute Toxicity, Mutagenicity, Tumorigenicity, Reproductive Effects,                             |
| A03235 | Acute Toxicity, Mutagenicity, Tumorigenicity, Reproductive Effects,                             |
| A03236 | Acute Toxicity                                                                                  |
| A03237 | Acute Toxicity, Mutagenicity, Reproductive Effects, Multiple Dose Effects                       |
| A03238 | Acute Toxicity, Mutagenicity, Tumorigenicity, Skin and Eye Irritation,                          |
| A03239 | Acute Toxicity, Mutagenicity, Tumorigenicity, Skin and Eye Irritation,<br>Multiple Dose Effects |
| A03240 | Acute Toxicity, Skin and Eye Irritation                                                         |
| A03241 | Acute Toxicity, Mutagenicity, Tumorigenicity, Reproductive Effects                              |
| A03242 | Acute Toxicity                                                                                  |
| A03243 | Acute Toxicity, Mutagenicity, Tumorigenicity, Skin and Eye Irritation,                          |
| A03244 | Mutagenicity                                                                                    |
| A03245 | Acute Toxicity, Mutagenicity                                                                    |
| A03246 | Acute Toxicity                                                                                  |
| A03247 | Acute Toxicity, Mutagenicity, Reproductive Effects                                              |
| A03248 | Acute Toxicity                                                                                  |
| A03249 | Skin and Eye Irritation                                                                         |
| A03250 | Acute Toxicity                                                                                  |
| A03251 | Acute Toxicity                                                                                  |
| A03252 | Tumorigenicity                                                                                  |
| A03253 | Acute Toxicity, Mutagenicity, Tumorigenicity, Skin and Eye Irritation,<br>Multiple Dose Effects |
| A03254 | Acute Toxicity, Mutagenicity, Reproductive Effects                                              |
| A03255 | Acute Toxicity                                                                                  |
| A03256 | Acute Toxicity, Mutagenicity, Tumorigenicity, Skin and Eye Irritation,                          |
| A03257 | Mutagenicity                                                                                    |
| A03258 | Acute Toxicity, Mutagenicity, Tumorigenicity                                                    |
| A03259 | Acute Toxicity, Mutagenicity, Skin and Eye Irritation, Multiple Dose Effects                    |
| A03260 | Acute Toxicity, Skin and Eye Irritation, Multiple Dose Effects                                  |
| A03261 | Acute Toxicity, Mutagenicity                                                                    |
| A03262 | Acute Toxicity                                                                                  |
| A03263 | Acute Toxicity, Mutagenicity, Skin and Eye Irritation                                           |
| A03264 | Acute Toxicity, Mutagenicity, Tumorigenicity, Skin and Eye Irritation,                          |
| A03265 | Mutagenicity                                                                                    |
| A03266 | Acute Toxicity, Skin and Eye Irritation, Reproductive Effects, Multiple Dose                    |
| A03267 | Acute Toxicity, Skin and Eye Irritation                                                         |
| A03268 | Acute Toxicity, Mutagenicity, Multiple Dose Effects                                             |
| A03269 | Acute Toxicity                                                                                  |
| A03270 | Acute Toxicity                                                                                  |
| A03271 | Acute Toxicity, Mutagenicity, Skin and Eye Irritation, Multiple Dose Effects                    |
| A03272 | Acute Toxicity, Mutagenicity                                                                    |
| A03273 | Acute Toxicity                                                                                  |
| A03274 | Mutagenicity                                                                                    |
| A03275 | Acute Toxicity, Multiple Dose Effects                                                           |

|        |                                                                              |
|--------|------------------------------------------------------------------------------|
| A03276 | Acute Toxicity, Mutagenicity, Skin and Eye Irritation, Multiple Dose Effects |
| A03277 | Acute Toxicity                                                               |
| A03278 | Acute Toxicity, Skin and Eye Irritation                                      |
| A03279 | Acute Toxicity, Skin and Eye Irritation                                      |
| A03280 | Acute Toxicity, Skin and Eye Irritation                                      |
| A03281 | Acute Toxicity, Mutagenicity, Skin and Eye Irritation, Multiple Dose Effects |
| A03282 | Acute Toxicity, Reproductive Effects, Multiple Dose Effects                  |
| A03283 | Acute Toxicity                                                               |
| A03284 | Acute Toxicity, Mutagenicity, Skin and Eye Irritation                        |
| A03285 | Acute Toxicity, Skin and Eye Irritation                                      |
| A03286 | Acute Toxicity                                                               |
| A03287 | Acute Toxicity, Skin and Eye Irritation, Reproductive Effects                |
| A03288 | Acute Toxicity, Mutagenicity, Reproductive Effects                           |
| A03289 | Acute Toxicity                                                               |
| A03290 | Acute Toxicity                                                               |
| A03291 | Acute Toxicity, Skin and Eye Irritation                                      |
| A03292 | Acute Toxicity, Skin and Eye Irritation, Multiple Dose Effects               |
| A03293 | Acute Toxicity, Reproductive Effects                                         |
| A03294 | Mutagenicity, Reproductive Effects                                           |
| A03295 | Acute Toxicity, Multiple Dose Effects                                        |
| A03296 | Acute Toxicity                                                               |
| A03297 | Acute Toxicity, Mutagenicity, Tumorigenicity, Reproductive Effects           |
| A03298 | Acute Toxicity, Reproductive Effects                                         |
| A03299 | Acute Toxicity                                                               |
| A03300 | Acute Toxicity, Mutagenicity, Tumorigenicity, Skin and Eye Irritation,       |
| A03301 | Acute Toxicity                                                               |
| A03302 | Acute Toxicity, Reproductive Effects                                         |
| A03303 | Acute Toxicity                                                               |
| A03304 | Acute Toxicity, Mutagenicity, Tumorigenicity, Multiple Dose Effects          |
| A03305 | Acute Toxicity, Mutagenicity, Skin and Eye Irritation                        |
| A03306 | Acute Toxicity                                                               |
| A03307 | Acute Toxicity, Mutagenicity                                                 |
| A03308 | Acute Toxicity, Multiple Dose Effects                                        |
| A03309 | Skin and Eye Irritation                                                      |
| A03310 | Acute Toxicity, Skin and Eye Irritation, Reproductive Effects, Multiple Dose |
| A03311 | Acute Toxicity, Skin and Eye Irritation, Multiple Dose Effects               |
| A03312 | Mutagenicity, Skin and Eye Irritation                                        |
| A03313 | Acute Toxicity, Mutagenicity, Tumorigenicity, Multiple Dose Effects          |
| A03314 | Acute Toxicity, Mutagenicity, Tumorigenicity, Skin and Eye Irritation,       |
| A03315 | Acute Toxicity, Mutagenicity, Skin and Eye Irritation                        |
| A03316 | Acute Toxicity, Skin and Eye Irritation                                      |
| A03317 | Acute Toxicity                                                               |
| A03318 | Acute Toxicity, Skin and Eye Irritation                                      |
| A03319 | Acute Toxicity                                                               |
| A03320 | Acute Toxicity                                                               |
| A03321 | Acute Toxicity, Mutagenicity, Tumorigenicity, Skin and Eye Irritation,       |

|        |                                                                              |
|--------|------------------------------------------------------------------------------|
| A03322 | Acute Toxicity, Multiple Dose Effects                                        |
| A03323 | Acute Toxicity, Mutagenicity                                                 |
| A03324 | Acute Toxicity, Mutagenicity, Reproductive Effects, Multiple Dose Effects    |
| A03325 | Acute Toxicity                                                               |
| A03326 | Reproductive Effects                                                         |
| A03327 | Acute Toxicity, Mutagenicity, Reproductive Effects, Multiple Dose Effects    |
| A03328 | Acute Toxicity                                                               |
| A03329 | Acute Toxicity, Mutagenicity, Reproductive Effects, Multiple Dose Effects    |
| A03330 | Skin and Eye Irritation, Reproductive Effects                                |
| A03331 | Acute Toxicity                                                               |
| A03332 | Reproductive Effects                                                         |
| A03333 | Acute Toxicity, Mutagenicity, Tumorigenicity, Skin and Eye Irritation        |
| A03334 | Acute Toxicity, Mutagenicity, Skin and Eye Irritation, Multiple Dose Effects |
| A03335 | Acute Toxicity, Reproductive Effects, Multiple Dose Effects                  |
| A03336 | Acute Toxicity, Mutagenicity, Tumorigenicity, Multiple Dose Effects          |
| A03337 | Acute Toxicity, Mutagenicity, Reproductive Effects                           |
| A03338 | Acute Toxicity, Skin and Eye Irritation, Reproductive Effects                |
| A03339 | Acute Toxicity                                                               |
| A03340 | Acute Toxicity                                                               |
| A03341 | Acute Toxicity                                                               |
| A03342 | Mutagenicity                                                                 |
| A03343 | Tumorigenicity                                                               |
| A03344 | Mutagenicity, Tumorigenicity                                                 |
| A03345 | Mutagenicity, Tumorigenicity                                                 |
| A03346 | Mutagenicity, Tumorigenicity                                                 |
| A03347 | Mutagenicity, Tumorigenicity                                                 |
| A03348 | Mutagenicity, Tumorigenicity                                                 |
| A03349 | Acute Toxicity, Mutagenicity, Tumorigenicity, Reproductive Effects,          |
| A03350 | Mutagenicity, Tumorigenicity                                                 |
| A03351 | Mutagenicity, Tumorigenicity, Reproductive Effects                           |
| A03352 | Mutagenicity                                                                 |
| A03353 | Mutagenicity, Tumorigenicity                                                 |
| A03354 | Mutagenicity                                                                 |
| A03355 | Mutagenicity                                                                 |
| A03356 | Acute Toxicity, Mutagenicity, Tumorigenicity                                 |
| A03357 | Mutagenicity, Tumorigenicity                                                 |
| A03358 | Mutagenicity, Tumorigenicity                                                 |
| A03359 | Mutagenicity                                                                 |
| A03360 | Mutagenicity, Tumorigenicity                                                 |
| A03361 | Mutagenicity                                                                 |
| A03362 | Mutagenicity, Tumorigenicity                                                 |
| A03363 | Mutagenicity                                                                 |
| A03364 | Mutagenicity, Tumorigenicity                                                 |
| A03365 | Mutagenicity, Tumorigenicity                                                 |
| A03366 | Mutagenicity, Tumorigenicity                                                 |
| A03367 | Mutagenicity                                                                 |

|        |                                                                                                      |
|--------|------------------------------------------------------------------------------------------------------|
| A03368 | Mutagenicity, Tumorigenicity                                                                         |
| A03369 | Acute Toxicity, Mutagenicity, Tumorigenicity, Multiple Dose Effects                                  |
| A03370 | Acute Toxicity, Mutagenicity, Tumorigenicity, Multiple Dose Effects                                  |
| A03371 | Acute Toxicity, Mutagenicity, Tumorigenicity, Multiple Dose Effects                                  |
| A03372 | Tumorigenicity                                                                                       |
| A03373 | Acute Toxicity, Mutagenicity, Multiple Dose Effects                                                  |
| A03374 | Mutagenicity, Tumorigenicity                                                                         |
| A03375 | Mutagenicity, Tumorigenicity                                                                         |
| A03376 | Mutagenicity, Tumorigenicity                                                                         |
| A03377 | Tumorigenicity                                                                                       |
| A03378 | Mutagenicity                                                                                         |
| A03379 | Acute Toxicity, Mutagenicity, Tumorigenicity, Multiple Dose Effects                                  |
| A03380 | Mutagenicity                                                                                         |
| A03381 | Mutagenicity                                                                                         |
| A03382 | Mutagenicity                                                                                         |
| A03383 | Mutagenicity, Tumorigenicity                                                                         |
| A03384 | Mutagenicity, Tumorigenicity, Reproductive Effects                                                   |
| A03385 | Mutagenicity, Tumorigenicity                                                                         |
| A03386 | Mutagenicity, Tumorigenicity                                                                         |
| A03387 | Tumorigenicity                                                                                       |
| A03388 | Mutagenicity, Tumorigenicity                                                                         |
| A03389 | Mutagenicity, Tumorigenicity                                                                         |
| A03390 | Mutagenicity, Tumorigenicity                                                                         |
| A03391 | Mutagenicity, Tumorigenicity                                                                         |
| A03392 | Mutagenicity                                                                                         |
| A03393 | Acute Toxicity                                                                                       |
| A03394 | Mutagenicity                                                                                         |
| A03395 | Tumorigenicity, Reproductive Effects                                                                 |
| A03396 | Mutagenicity, Tumorigenicity                                                                         |
| A03397 | Mutagenicity                                                                                         |
| A03398 | Mutagenicity                                                                                         |
| A03399 | Acute Toxicity                                                                                       |
| A03400 | Acute Toxicity, Tumorigenicity, Skin and Eye Irritation, Reproductive Effects, Multiple Dose Effects |
| A03401 | Acute Toxicity, Mutagenicity, Tumorigenicity, Multiple Dose Effects                                  |
| A03402 | Acute Toxicity, Mutagenicity, Tumorigenicity                                                         |
| A03403 | Acute Toxicity, Mutagenicity                                                                         |
| A03404 | Acute Toxicity                                                                                       |
| A03405 | Acute Toxicity                                                                                       |
| A03406 | Acute Toxicity                                                                                       |
| A03407 | Acute Toxicity                                                                                       |
| A03408 | Acute Toxicity, Mutagenicity, Tumorigenicity, Multiple Dose Effects                                  |
| A03409 | Acute Toxicity                                                                                       |
| A03410 | Mutagenicity                                                                                         |
| A03411 | Acute Toxicity                                                                                       |
| A03412 | Acute Toxicity                                                                                       |

|        |                                                                                                    |
|--------|----------------------------------------------------------------------------------------------------|
| A03413 | Acute Toxicity, Multiple Dose Effects                                                              |
| A03414 | Acute Toxicity, Skin and Eye Irritation                                                            |
| A03415 | Acute Toxicity, Mutagenicity, Skin and Eye Irritation, Multiple Dose Effects                       |
| A03416 | Mutagenicity                                                                                       |
| A03417 | Acute Toxicity, Mutagenicity, Tumorigenicity                                                       |
| A03418 | Mutagenicity                                                                                       |
| A03419 | Acute Toxicity, Multiple Dose Effects                                                              |
| A03420 | Acute Toxicity, Skin and Eye Irritation, Reproductive Effects, Multiple Dose                       |
| A03421 | Acute Toxicity                                                                                     |
| A03422 | Acute Toxicity, Mutagenicity                                                                       |
| A03423 | Acute Toxicity, Mutagenicity                                                                       |
| A03424 | Mutagenicity                                                                                       |
| A03425 | Acute Toxicity, Skin and Eye Irritation                                                            |
| A03426 | Acute Toxicity                                                                                     |
| A03427 | Acute Toxicity, Mutagenicity, Skin and Eye Irritation, Reproductive Effects, Multiple Dose Effects |
| A03428 | Mutagenicity, Tumorigenicity, Reproductive Effects, Multiple Dose Effects                          |
| A03429 | Acute Toxicity                                                                                     |
| A03430 | Acute Toxicity, Mutagenicity                                                                       |
| A03431 | Acute Toxicity, Mutagenicity, Skin and Eye Irritation                                              |
| A03432 | Acute Toxicity, Skin and Eye Irritation                                                            |
| A03433 | Acute Toxicity                                                                                     |
| A03434 | Acute Toxicity, Mutagenicity                                                                       |
| A03435 | Acute Toxicity                                                                                     |
| A03436 | Acute Toxicity, Mutagenicity                                                                       |
| A03437 | Acute Toxicity, Reproductive Effects                                                               |
| A03438 | Acute Toxicity, Skin and Eye Irritation, Reproductive Effects, Multiple Dose                       |
| A03439 | Acute Toxicity                                                                                     |
| A03440 | Multiple Dose Effects                                                                              |
| A03441 | Acute Toxicity, Mutagenicity, Reproductive Effects, Multiple Dose Effects                          |
| A03442 | Acute Toxicity, Multiple Dose Effects                                                              |
| A03443 | Acute Toxicity, Reproductive Effects, Multiple Dose Effects                                        |
| A03444 | Acute Toxicity                                                                                     |
| A03445 | Multiple Dose Effects                                                                              |
| A03446 | Acute Toxicity                                                                                     |
| A03447 | Acute Toxicity, Skin and Eye Irritation, Multiple Dose Effects                                     |
| A03448 | Acute Toxicity                                                                                     |
| A03449 | Acute Toxicity                                                                                     |
| A03450 | Acute Toxicity                                                                                     |
| A03451 | Acute Toxicity, Mutagenicity, Tumorigenicity, Skin and Eye Irritation,                             |
| A03452 | Acute Toxicity, Mutagenicity, Tumorigenicity, Reproductive Effects,                                |
| A03453 | Acute Toxicity, Mutagenicity                                                                       |
| A03454 | Acute Toxicity                                                                                     |
| A03455 | Acute Toxicity                                                                                     |
| A03456 | Acute Toxicity                                                                                     |
| A03457 | Acute Toxicity, Mutagenicity, Tumorigenicity                                                       |



|        |                                                                                                       |
|--------|-------------------------------------------------------------------------------------------------------|
| A03458 | Acute Toxicity                                                                                        |
| A03459 | Acute Toxicity                                                                                        |
| A03460 | Reproductive Effects                                                                                  |
| A03461 | Acute Toxicity                                                                                        |
| A03462 | Acute Toxicity                                                                                        |
| A03463 | Mutagenicity, Tumorigenicity                                                                          |
| A03464 | Acute Toxicity                                                                                        |
| A03465 | Acute Toxicity                                                                                        |
| A03466 | Acute Toxicity, Mutagenicity, Reproductive Effects, Multiple Dose Effects                             |
| A03467 | Acute Toxicity                                                                                        |
| A03468 | Acute Toxicity                                                                                        |
| A03469 | Acute Toxicity, Mutagenicity                                                                          |
| A03470 | Tumorigenicity                                                                                        |
| A03471 | Acute Toxicity, Mutagenicity, Tumorigenicity, Reproductive Effects,                                   |
| A03472 | Acute Toxicity                                                                                        |
| A03473 | Acute Toxicity, Mutagenicity, Tumorigenicity, Skin and Eye Irritation,                                |
| A03474 | Acute Toxicity, Multiple Dose Effects                                                                 |
| A03475 | Acute Toxicity                                                                                        |
| A03476 | Acute Toxicity, Multiple Dose Effects                                                                 |
| A03477 | Acute Toxicity, Mutagenicity, Multiple Dose Effects                                                   |
| A03478 | Acute Toxicity, Multiple Dose Effects                                                                 |
| A03479 | Acute Toxicity                                                                                        |
| A03480 | Acute Toxicity, Mutagenicity, Skin and Eye Irritation, Reproductive Effects,<br>Multiple Dose Effects |
| A03481 | Acute Toxicity, Reproductive Effects, Multiple Dose Effects                                           |
| A03482 | Tumorigenicity                                                                                        |
| A03483 | Mutagenicity                                                                                          |
| A03484 | Acute Toxicity, Mutagenicity, Tumorigenicity, Reproductive Effects,                                   |
| A03485 | Acute Toxicity                                                                                        |
| A03486 | Acute Toxicity                                                                                        |
| A03487 | Acute Toxicity, Mutagenicity, Tumorigenicity, Reproductive Effects,                                   |
| A03488 | Acute Toxicity, Mutagenicity, Tumorigenicity, Reproductive Effects,                                   |
| A03489 | Acute Toxicity, Mutagenicity, Tumorigenicity, Skin and Eye Irritation,                                |
| A03490 | Acute Toxicity                                                                                        |
| A03491 | Mutagenicity, Tumorigenicity                                                                          |
| A03492 | Acute Toxicity, Mutagenicity                                                                          |
| A03493 | Acute Toxicity, Mutagenicity, Reproductive Effects                                                    |
| A03494 | Acute Toxicity, Mutagenicity, Skin and Eye Irritation, Multiple Dose Effects                          |
| A03495 | Acute Toxicity                                                                                        |
| A03496 | Acute Toxicity, Mutagenicity, Tumorigenicity, Skin and Eye Irritation,                                |
| A03497 | Acute Toxicity                                                                                        |
| A03498 | Acute Toxicity, Mutagenicity, Multiple Dose Effects                                                   |
| A03499 | Acute Toxicity                                                                                        |
| A03500 | Acute Toxicity                                                                                        |
| A03501 | Acute Toxicity, Mutagenicity                                                                          |
| A03502 | Acute Toxicity                                                                                        |

|        |                                                                                                    |
|--------|----------------------------------------------------------------------------------------------------|
| A03503 | Acute Toxicity                                                                                     |
| A03504 | Mutagenicity                                                                                       |
| A03505 | Acute Toxicity, Mutagenicity, Tumorigenicity                                                       |
| A03506 | Acute Toxicity                                                                                     |
| A03507 | Acute Toxicity, Mutagenicity, Skin and Eye Irritation                                              |
| A03508 | Acute Toxicity, Multiple Dose Effects                                                              |
| A03509 | Acute Toxicity                                                                                     |
| A03510 | Acute Toxicity                                                                                     |
| A03511 | Acute Toxicity, Mutagenicity                                                                       |
| A03512 | Acute Toxicity, Mutagenicity, Reproductive Effects, Multiple Dose Effects                          |
| A03513 | Acute Toxicity, Mutagenicity, Reproductive Effects, Multiple Dose Effects                          |
| A03514 | Acute Toxicity                                                                                     |
| A03515 | Mutagenicity                                                                                       |
| A03516 | Acute Toxicity, Multiple Dose Effects                                                              |
| A03517 | Acute Toxicity, Mutagenicity                                                                       |
| A03518 | Acute Toxicity, Mutagenicity, Reproductive Effects                                                 |
| A03519 | Acute Toxicity                                                                                     |
| A03520 | Acute Toxicity, Mutagenicity, Tumorigenicity                                                       |
| A03521 | Acute Toxicity                                                                                     |
| A03522 | Acute Toxicity                                                                                     |
| A03523 | Acute Toxicity, Mutagenicity, Tumorigenicity, Reproductive Effects,                                |
| A03524 | Acute Toxicity, Mutagenicity, Reproductive Effects, Multiple Dose Effects                          |
| A03525 | Acute Toxicity, Mutagenicity, Skin and Eye Irritation, Reproductive Effects, Multiple Dose Effects |
| A03526 | Acute Toxicity, Mutagenicity                                                                       |
| A03527 | Acute Toxicity                                                                                     |
| A03528 | Acute Toxicity, Mutagenicity, Tumorigenicity, Reproductive Effects                                 |
| A03529 | Acute Toxicity                                                                                     |
| A03530 | Tumorigenicity                                                                                     |
| A03531 | Acute Toxicity                                                                                     |
| A03532 | Multiple Dose Effects                                                                              |
| A03533 | Acute Toxicity, Mutagenicity, Reproductive Effects, Multiple Dose Effects                          |
| A03534 | Acute Toxicity                                                                                     |
| A03535 | Acute Toxicity                                                                                     |
| A03536 | Acute Toxicity, Mutagenicity                                                                       |
| A03537 | Acute Toxicity, Mutagenicity                                                                       |
| A03538 | Acute Toxicity                                                                                     |
| A03539 | Mutagenicity                                                                                       |
| A03540 | Acute Toxicity                                                                                     |
| A03541 | Acute Toxicity, Skin and Eye Irritation                                                            |
| A03542 | Acute Toxicity                                                                                     |
| A03543 | Acute Toxicity                                                                                     |
| A03544 | Acute Toxicity                                                                                     |
| A03545 | Acute Toxicity, Mutagenicity, Reproductive Effects, Multiple Dose Effects                          |
| A03546 | Acute Toxicity                                                                                     |
| A03547 | Acute Toxicity, Skin and Eye Irritation, Multiple Dose Effects                                     |

|        |                                                                                                    |
|--------|----------------------------------------------------------------------------------------------------|
| A03548 | Acute Toxicity, Multiple Dose Effects                                                              |
| A03549 | Acute Toxicity, Mutagenicity, Multiple Dose Effects                                                |
| A03550 | Acute Toxicity                                                                                     |
| A03551 | Acute Toxicity                                                                                     |
| A03552 | Acute Toxicity                                                                                     |
| A03553 | Acute Toxicity, Multiple Dose Effects                                                              |
| A03554 | Acute Toxicity, Multiple Dose Effects                                                              |
| A03555 | Acute Toxicity                                                                                     |
| A03556 | Acute Toxicity, Mutagenicity, Skin and Eye Irritation, Reproductive Effects, Multiple Dose Effects |
| A03557 | Acute Toxicity                                                                                     |
| A03558 | Acute Toxicity, Multiple Dose Effects                                                              |
| A03559 | Acute Toxicity, Multiple Dose Effects                                                              |
| A03560 | Acute Toxicity, Multiple Dose Effects                                                              |
| A03561 | Acute Toxicity                                                                                     |
| A03562 | Mutagenicity                                                                                       |
| A03563 | Acute Toxicity                                                                                     |
| A03564 | Acute Toxicity                                                                                     |
| A03565 | Acute Toxicity, Reproductive Effects, Multiple Dose Effects                                        |
| A03566 | Non-toxicity                                                                                       |
| A03567 | Acute Toxicity, Multiple Dose Effects                                                              |
| A03568 | Acute Toxicity                                                                                     |
| A03569 | Acute Toxicity, Mutagenicity                                                                       |
| A03570 | Acute Toxicity, Mutagenicity, Tumorigenicity, Reproductive Effects                                 |
| A03571 | Non-toxicity                                                                                       |
| A03572 | Acute Toxicity                                                                                     |
| A03573 | Mutagenicity, Tumorigenicity                                                                       |
| A03574 | Acute Toxicity, Multiple Dose Effects                                                              |
| A03575 | Mutagenicity                                                                                       |
| A03576 | Mutagenicity                                                                                       |
| A03577 | Acute Toxicity                                                                                     |
| A03578 | Acute Toxicity, Mutagenicity                                                                       |
| A03579 | Acute Toxicity, Mutagenicity                                                                       |
| A03580 | Skin and Eye Irritation                                                                            |
| A03581 | Mutagenicity, Reproductive Effects, Multiple Dose Effects                                          |
| A03582 | Acute Toxicity                                                                                     |
| A03583 | Acute Toxicity, Mutagenicity, Skin and Eye Irritation                                              |
| A03584 | Acute Toxicity, Tumorigenicity, Reproductive Effects                                               |
| A03585 | Acute Toxicity                                                                                     |
| A03586 | Acute Toxicity, Multiple Dose Effects                                                              |
| A03587 | Acute Toxicity                                                                                     |
| A03588 | Acute Toxicity                                                                                     |
| A03589 | Acute Toxicity                                                                                     |
| A03590 | Mutagenicity                                                                                       |
| A03591 | Non-toxicity                                                                                       |
| A03592 | Acute Toxicity                                                                                     |

|        |                                                                              |
|--------|------------------------------------------------------------------------------|
| A03593 | Acute Toxicity                                                               |
| A03594 | Acute Toxicity, Multiple Dose Effects                                        |
| A03595 | Acute Toxicity                                                               |
| A03596 | Acute Toxicity                                                               |
| A03597 | Acute Toxicity, Skin and Eye Irritation, Reproductive Effects, Multiple Dose |
| A03598 | Acute Toxicity                                                               |
| A03599 | Mutagenicity                                                                 |
| A03600 | Reproductive Effects                                                         |
| A03601 | Acute Toxicity, Reproductive Effects, Multiple Dose Effects                  |
| A03602 | Acute Toxicity                                                               |
| A03603 | Acute Toxicity, Skin and Eye Irritation                                      |
| A03604 | Acute Toxicity, Mutagenicity, Multiple Dose Effects                          |
| A03605 | Tumorigenicity                                                               |
| A03606 | Acute Toxicity                                                               |
| A03607 | Acute Toxicity                                                               |
| A03608 | Acute Toxicity, Mutagenicity, Reproductive Effects                           |
| A03609 | Skin and Eye Irritation                                                      |
| A03610 | Acute Toxicity, Skin and Eye Irritation                                      |
| A03611 | Acute Toxicity, Skin and Eye Irritation, Reproductive Effects, Multiple Dose |
| A03612 | Acute Toxicity, Mutagenicity, Tumorigenicity, Skin and Eye Irritation        |
| A03613 | Acute Toxicity, Mutagenicity, Reproductive Effects                           |
| A03614 | Acute Toxicity                                                               |
| A03615 | Acute Toxicity                                                               |
| A03616 | Acute Toxicity, Skin and Eye Irritation                                      |
| A03617 | Acute Toxicity, Skin and Eye Irritation, Multiple Dose Effects               |
| A03618 | Acute Toxicity, Mutagenicity, Tumorigenicity, Reproductive Effects,          |
| A03619 | Acute Toxicity                                                               |
| A03620 | Acute Toxicity                                                               |
| A03621 | Acute Toxicity, Multiple Dose Effects                                        |
| A03622 | Acute Toxicity                                                               |
| A03623 | Acute Toxicity                                                               |
| A03624 | Acute Toxicity                                                               |
| A03625 | Acute Toxicity, Mutagenicity, Tumorigenicity, Reproductive Effects,          |
| A03626 | Reproductive Effects                                                         |
| A03627 | Acute Toxicity                                                               |
| A03628 | Acute Toxicity, Reproductive Effects, Multiple Dose Effects                  |
| A03629 | Acute Toxicity                                                               |
| A03630 | Acute Toxicity                                                               |
| A03631 | Mutagenicity                                                                 |
| A03632 | Acute Toxicity, Reproductive Effects, Multiple Dose Effects                  |
| A03633 | Acute Toxicity                                                               |
| A03634 | Acute Toxicity, Skin and Eye Irritation                                      |
| A03635 | Acute Toxicity                                                               |
| A03636 | Acute Toxicity, Skin and Eye Irritation                                      |
| A03637 | Acute Toxicity, Mutagenicity                                                 |
| A03638 | Acute Toxicity                                                               |

|        |                                                                           |
|--------|---------------------------------------------------------------------------|
| A03639 | Mutagenicity, Tumorigenicity, Multiple Dose Effects                       |
| A03640 | Acute Toxicity, Multiple Dose Effects                                     |
| A03641 | Acute Toxicity                                                            |
| A03642 | Acute Toxicity, Mutagenicity, Multiple Dose Effects                       |
| A03643 | Acute Toxicity                                                            |
| A03644 | Acute Toxicity                                                            |
| A03645 | Acute Toxicity                                                            |
| A03646 | Acute Toxicity                                                            |
| A03647 | Acute Toxicity                                                            |
| A03648 | Mutagenicity, Tumorigenicity                                              |
| A03649 | Acute Toxicity, Skin and Eye Irritation, Multiple Dose Effects            |
| A03650 | Acute Toxicity                                                            |
| A03651 | Mutagenicity, Reproductive Effects                                        |
| A03652 | Acute Toxicity, Mutagenicity, Reproductive Effects, Multiple Dose Effects |
| A03653 | Acute Toxicity, Multiple Dose Effects                                     |
| A03654 | Acute Toxicity, Skin and Eye Irritation, Multiple Dose Effects            |
| A03655 | Acute Toxicity                                                            |
| A03656 | Acute Toxicity, Mutagenicity                                              |
| A03657 | Acute Toxicity, Mutagenicity                                              |
| A03658 | Acute Toxicity, Mutagenicity                                              |
| A03659 | Acute Toxicity                                                            |
| A03660 | Acute Toxicity                                                            |
| A03661 | Acute Toxicity, Mutagenicity                                              |
| A03662 | Acute Toxicity, Multiple Dose Effects                                     |
| A03663 | Acute Toxicity, Skin and Eye Irritation                                   |
| A03664 | Acute Toxicity                                                            |
| A03665 | Acute Toxicity                                                            |
| A03666 | Acute Toxicity, Multiple Dose Effects                                     |
| A03667 | Acute Toxicity, Mutagenicity                                              |
| A03668 | Acute Toxicity                                                            |
| A03669 | Acute Toxicity                                                            |
| A03670 | Acute Toxicity                                                            |
| A03671 | Acute Toxicity                                                            |
| A03672 | Acute Toxicity, Mutagenicity                                              |
| A03673 | Acute Toxicity                                                            |
| A03674 | Acute Toxicity                                                            |
| A03675 | Acute Toxicity, Reproductive Effects                                      |
| A03676 | Acute Toxicity                                                            |
| A03677 | Acute Toxicity                                                            |
| A03678 | Acute Toxicity                                                            |
| A03679 | Acute Toxicity                                                            |
| A03680 | Acute Toxicity                                                            |
| A03681 | Acute Toxicity, Skin and Eye Irritation                                   |
| A03682 | Acute Toxicity, Tumorigenicity, Skin and Eye Irritation, Multiple Dose    |
| A03683 | Acute Toxicity                                                            |
| A03684 | Acute Toxicity                                                            |

|        |                                                                              |
|--------|------------------------------------------------------------------------------|
| A03685 | Acute Toxicity, Mutagenicity                                                 |
| A03686 | Acute Toxicity, Mutagenicity, Tumorigenicity, Reproductive Effects,          |
| A03687 | Mutagenicity                                                                 |
| A03688 | Mutagenicity, Multiple Dose Effects                                          |
| A03689 | Acute Toxicity                                                               |
| A03690 | Acute Toxicity, Mutagenicity                                                 |
| A03691 | Acute Toxicity, Multiple Dose Effects                                        |
| A03692 | Mutagenicity                                                                 |
| A03693 | Mutagenicity                                                                 |
| A03694 | Acute Toxicity, Mutagenicity                                                 |
| A03695 | Mutagenicity                                                                 |
| A03696 | Acute Toxicity                                                               |
| A03697 | Acute Toxicity, Mutagenicity, Reproductive Effects                           |
| A03698 | Acute Toxicity, Mutagenicity                                                 |
| A03699 | Acute Toxicity                                                               |
| A03700 | Acute Toxicity                                                               |
| A03701 | Mutagenicity, Multiple Dose Effects                                          |
| A03702 | Acute Toxicity                                                               |
| A03703 | Acute Toxicity, Mutagenicity, Multiple Dose Effects                          |
| A03704 | Acute Toxicity, Tumorigenicity, Multiple Dose Effects                        |
| A03705 | Acute Toxicity, Reproductive Effects                                         |
| A03706 | Acute Toxicity                                                               |
| A03707 | Acute Toxicity                                                               |
| A03708 | Tumorigenicity                                                               |
| A03709 | Acute Toxicity, Mutagenicity, Skin and Eye Irritation, Multiple Dose Effects |
| A03710 | Acute Toxicity, Mutagenicity                                                 |
| A03711 | Mutagenicity                                                                 |
| A03712 | Acute Toxicity, Mutagenicity, Tumorigenicity                                 |
| A03713 | Acute Toxicity                                                               |
| A03714 | Acute Toxicity                                                               |
| A03715 | Acute Toxicity                                                               |
| A03716 | Acute Toxicity                                                               |
| A03717 | Acute Toxicity, Mutagenicity                                                 |
| A03718 | Reproductive Effects                                                         |
| A03719 | Acute Toxicity, Mutagenicity, Tumorigenicity, Reproductive Effects,          |
| A03720 | Acute Toxicity, Mutagenicity, Tumorigenicity, Reproductive Effects,          |
| A03721 | Mutagenicity                                                                 |
| A03722 | Mutagenicity                                                                 |
| A03723 | Acute Toxicity                                                               |
| A03724 | Acute Toxicity, Mutagenicity, Tumorigenicity, Multiple Dose Effects          |
| A03725 | Acute Toxicity                                                               |
| A03726 | Acute Toxicity                                                               |
| A03727 | Acute Toxicity                                                               |
| A03728 | Acute Toxicity, Mutagenicity, Skin and Eye Irritation                        |
| A03729 | Mutagenicity                                                                 |
| A03730 | Mutagenicity                                                                 |

|        |                                                                           |
|--------|---------------------------------------------------------------------------|
| A03731 | Mutagenicity                                                              |
| A03732 | Acute Toxicity, Multiple Dose Effects                                     |
| A03733 | Mutagenicity                                                              |
| A03734 | Acute Toxicity, Mutagenicity, Reproductive Effects                        |
| A03735 | Acute Toxicity, Mutagenicity                                              |
| A03736 | Acute Toxicity, Mutagenicity                                              |
| A03737 | Acute Toxicity, Mutagenicity                                              |
| A03738 | Acute Toxicity                                                            |
| A03739 | Acute Toxicity, Mutagenicity                                              |
| A03740 | Acute Toxicity, Reproductive Effects                                      |
| A03741 | Acute Toxicity                                                            |
| A03742 | Acute Toxicity                                                            |
| A03743 | Acute Toxicity                                                            |
| A03744 | Acute Toxicity, Mutagenicity, Tumorigenicity                              |
| A03745 | Acute Toxicity                                                            |
| A03746 | Mutagenicity                                                              |
| A03747 | Acute Toxicity                                                            |
| A03748 | Acute Toxicity                                                            |
| A03749 | Acute Toxicity                                                            |
| A03750 | Acute Toxicity                                                            |
| A03751 | Mutagenicity                                                              |
| A03752 | Acute Toxicity, Mutagenicity, Reproductive Effects, Multiple Dose Effects |
| A03753 | Acute Toxicity                                                            |
| A03754 | Acute Toxicity                                                            |
| A03755 | Acute Toxicity, Mutagenicity, Skin and Eye Irritation                     |
| A03756 | Non-toxicity                                                              |
| A03757 | Tumorigenicity, Multiple Dose Effects                                     |
| A03758 | Acute Toxicity                                                            |
| A03759 | Acute Toxicity                                                            |
| A03760 | Acute Toxicity                                                            |
| A03761 | Acute Toxicity, Mutagenicity, Multiple Dose Effects                       |
| A03762 | Mutagenicity, Tumorigenicity                                              |
| A03763 | Acute Toxicity                                                            |
| A03764 | Acute Toxicity, Mutagenicity                                              |
| A03765 | Acute Toxicity, Mutagenicity, Tumorigenicity                              |
| A03766 | Acute Toxicity, Mutagenicity, Tumorigenicity, Multiple Dose Effects       |
| A03767 | Acute Toxicity                                                            |
| A03768 | Acute Toxicity, Tumorigenicity                                            |
| A03769 | Acute Toxicity, Mutagenicity, Tumorigenicity, Reproductive Effects        |
| A03770 | Acute Toxicity, Skin and Eye Irritation                                   |
| A03771 | Acute Toxicity, Mutagenicity                                              |
| A03772 | Acute Toxicity                                                            |
| A03773 | Acute Toxicity                                                            |
| A03774 | Mutagenicity                                                              |
| A03775 | Acute Toxicity                                                            |
| A03776 | Acute Toxicity                                                            |

|        |                                                                              |
|--------|------------------------------------------------------------------------------|
| A03777 | Acute Toxicity, Mutagenicity                                                 |
| A03778 | Acute Toxicity                                                               |
| A03779 | Acute Toxicity                                                               |
| A03780 | Acute Toxicity, Mutagenicity, Multiple Dose Effects                          |
| A03781 | Mutagenicity                                                                 |
| A03782 | Mutagenicity, Reproductive Effects                                           |
| A03783 | Acute Toxicity, Skin and Eye Irritation, Multiple Dose Effects               |
| A03784 | Mutagenicity                                                                 |
| A03785 | Mutagenicity                                                                 |
| A03786 | Acute Toxicity                                                               |
| A03787 | Acute Toxicity                                                               |
| A03788 | Acute Toxicity, Mutagenicity, Skin and Eye Irritation                        |
| A03789 | Acute Toxicity                                                               |
| A03790 | Acute Toxicity, Skin and Eye Irritation                                      |
| A03791 | Acute Toxicity, Multiple Dose Effects                                        |
| A03792 | Acute Toxicity                                                               |
| A03793 | Acute Toxicity                                                               |
| A03794 | Mutagenicity                                                                 |
| A03795 | Acute Toxicity                                                               |
| A03796 | Acute Toxicity                                                               |
| A03797 | Acute Toxicity, Mutagenicity                                                 |
| A03798 | Acute Toxicity, Multiple Dose Effects                                        |
| A03799 | Multiple Dose Effects                                                        |
| A03800 | Acute Toxicity                                                               |
| A03801 | Acute Toxicity                                                               |
| A03802 | Acute Toxicity                                                               |
| A03803 | Acute Toxicity, Mutagenicity                                                 |
| A03804 | Acute Toxicity, Skin and Eye Irritation                                      |
| A03805 | Acute Toxicity                                                               |
| A03806 | Acute Toxicity                                                               |
| A03807 | Acute Toxicity, Multiple Dose Effects                                        |
| A03808 | Skin and Eye Irritation                                                      |
| A03809 | Acute Toxicity, Multiple Dose Effects                                        |
| A03810 | Acute Toxicity, Mutagenicity                                                 |
| A03811 | Acute Toxicity                                                               |
| A03812 | Acute Toxicity                                                               |
| A03813 | Acute Toxicity, Mutagenicity, Tumorigenicity                                 |
| A03814 | Acute Toxicity                                                               |
| A03815 | Multiple Dose Effects                                                        |
| A03816 | Acute Toxicity                                                               |
| A03817 | Acute Toxicity, Skin and Eye Irritation                                      |
| A03818 | Acute Toxicity, Mutagenicity, Skin and Eye Irritation, Multiple Dose Effects |
| A03819 | Acute Toxicity, Mutagenicity                                                 |
| A03820 | Acute Toxicity, Mutagenicity                                                 |
| A03821 | Acute Toxicity, Mutagenicity, Skin and Eye Irritation                        |
| A03822 | Acute Toxicity, Mutagenicity, Tumorigenicity                                 |



|        |                                                                                                 |
|--------|-------------------------------------------------------------------------------------------------|
| A03823 | Acute Toxicity                                                                                  |
| A03824 | Mutagenicity                                                                                    |
| A03825 | Acute Toxicity, Mutagenicity                                                                    |
| A03826 | Acute Toxicity, Mutagenicity, Multiple Dose Effects                                             |
| A03827 | Acute Toxicity, Skin and Eye Irritation, Reproductive Effects, Multiple Dose                    |
| A03828 | Acute Toxicity                                                                                  |
| A03829 | Acute Toxicity, Reproductive Effects                                                            |
| A03830 | Non-toxicity                                                                                    |
| A03831 | Non-toxicity                                                                                    |
| A03832 | Acute Toxicity, Mutagenicity, Tumorigenicity, Skin and Eye Irritation,                          |
| A03833 | Acute Toxicity                                                                                  |
| A03834 | Acute Toxicity                                                                                  |
| A03835 | Tumorigenicity                                                                                  |
| A03836 | Non-toxicity                                                                                    |
| A03837 | Acute Toxicity, Multiple Dose Effects                                                           |
| A03838 | Non-toxicity                                                                                    |
| A03839 | Acute Toxicity, Mutagenicity, Tumorigenicity, Reproductive Effects                              |
| A03840 | Acute Toxicity                                                                                  |
| A03841 | Acute Toxicity                                                                                  |
| A03842 | Acute Toxicity                                                                                  |
| A03843 | Acute Toxicity, Mutagenicity                                                                    |
| A03844 | Acute Toxicity, Skin and Eye Irritation                                                         |
| A03845 | Acute Toxicity                                                                                  |
| A03846 | Acute Toxicity, Multiple Dose Effects                                                           |
| A03847 | Acute Toxicity, Mutagenicity, Tumorigenicity                                                    |
| A03848 | Mutagenicity, Tumorigenicity                                                                    |
| A03849 | Acute Toxicity                                                                                  |
| A03850 | Acute Toxicity                                                                                  |
| A03851 | Acute Toxicity, Tumorigenicity, Skin and Eye Irritation, Multiple Dose                          |
| A03852 | Acute Toxicity                                                                                  |
| A03853 | Skin and Eye Irritation                                                                         |
| A03854 | Acute Toxicity, Mutagenicity, Tumorigenicity, Multiple Dose Effects                             |
| A03855 | Non-toxicity                                                                                    |
| A03856 | Acute Toxicity                                                                                  |
| A03857 | Acute Toxicity                                                                                  |
| A03858 | Acute Toxicity, Mutagenicity, Tumorigenicity, Skin and Eye Irritation,<br>Multiple Dose Effects |
| A03859 | Acute Toxicity                                                                                  |
| A03860 | Acute Toxicity                                                                                  |
| A03861 | Acute Toxicity, Mutagenicity, Tumorigenicity, Reproductive Effects,                             |
| A03862 | Acute Toxicity                                                                                  |
| A03863 | Acute Toxicity, Multiple Dose Effects                                                           |
| A03864 | Acute Toxicity, Mutagenicity                                                                    |
| A03865 | Mutagenicity                                                                                    |
| A03866 | Acute Toxicity, Mutagenicity, Tumorigenicity, Multiple Dose Effects                             |
| A03867 | Acute Toxicity, Mutagenicity                                                                    |

|        |                                                                                                    |
|--------|----------------------------------------------------------------------------------------------------|
| A03868 | Acute Toxicity, Skin and Eye Irritation                                                            |
| A03869 | Acute Toxicity, Skin and Eye Irritation                                                            |
| A03870 | Mutagenicity, Tumorigenicity                                                                       |
| A03871 | Multiple Dose Effects                                                                              |
| A03872 | Acute Toxicity, Mutagenicity, Multiple Dose Effects                                                |
| A03873 | Acute Toxicity, Mutagenicity, Skin and Eye Irritation, Multiple Dose Effects                       |
| A03874 | Acute Toxicity                                                                                     |
| A03875 | Acute Toxicity                                                                                     |
| A03876 | Reproductive Effects                                                                               |
| A03877 | Acute Toxicity                                                                                     |
| A03878 | Acute Toxicity, Multiple Dose Effects                                                              |
| A03879 | Acute Toxicity                                                                                     |
| A03880 | Acute Toxicity, Mutagenicity, Skin and Eye Irritation, Reproductive Effects, Multiple Dose Effects |
| A03881 | Acute Toxicity                                                                                     |
| A03882 | Mutagenicity, Skin and Eye Irritation                                                              |
| A03883 | Acute Toxicity                                                                                     |
| A03884 | Acute Toxicity                                                                                     |
| A03885 | Acute Toxicity, Multiple Dose Effects                                                              |
| A03886 | Acute Toxicity                                                                                     |
| A03887 | Acute Toxicity, Mutagenicity, Tumorigenicity, Multiple Dose Effects                                |
| A03888 | Acute Toxicity, Mutagenicity                                                                       |
| A03889 | Acute Toxicity, Mutagenicity, Reproductive Effects, Multiple Dose Effects                          |
| A03890 | Acute Toxicity, Reproductive Effects                                                               |
| A03891 | Reproductive Effects                                                                               |
| A03892 | Acute Toxicity, Mutagenicity, Reproductive Effects, Multiple Dose Effects                          |
| A03893 | Acute Toxicity, Mutagenicity                                                                       |
| A03894 | Acute Toxicity, Mutagenicity                                                                       |
| A03895 | Acute Toxicity                                                                                     |
| A03896 | Acute Toxicity, Reproductive Effects, Multiple Dose Effects                                        |
| A03897 | Acute Toxicity                                                                                     |
| A03898 | Mutagenicity                                                                                       |
| A03899 | Acute Toxicity, Mutagenicity, Tumorigenicity, Multiple Dose Effects                                |
| A03900 | Acute Toxicity, Mutagenicity                                                                       |
| A03901 | Acute Toxicity, Mutagenicity, Skin and Eye Irritation, Multiple Dose Effects                       |
| A03902 | Acute Toxicity                                                                                     |
| A03903 | Acute Toxicity                                                                                     |
| A03904 | Acute Toxicity                                                                                     |
| A03905 | Acute Toxicity                                                                                     |
| A03906 | Acute Toxicity, Mutagenicity                                                                       |
| A03907 | Skin and Eye Irritation                                                                            |
| A03908 | Mutagenicity                                                                                       |
| A03909 | Mutagenicity, Tumorigenicity                                                                       |
| A03910 | Acute Toxicity, Mutagenicity, Tumorigenicity, Multiple Dose Effects                                |
| A03911 | Acute Toxicity                                                                                     |
| A03912 | Acute Toxicity                                                                                     |

|        |                                                                                              |
|--------|----------------------------------------------------------------------------------------------|
| A03913 | Acute Toxicity, Mutagenicity                                                                 |
| A03914 | Acute Toxicity, Mutagenicity, Multiple Dose Effects                                          |
| A03915 | Acute Toxicity, Mutagenicity                                                                 |
| A03916 | Mutagenicity                                                                                 |
| A03917 | Acute Toxicity                                                                               |
| A03918 | Acute Toxicity, Mutagenicity, Skin and Eye Irritation, Multiple Dose Effects                 |
| A03919 | Acute Toxicity, Mutagenicity                                                                 |
| A03920 | Mutagenicity                                                                                 |
| A03921 | Acute Toxicity                                                                               |
| A03922 | Acute Toxicity, Mutagenicity                                                                 |
| A03923 | Acute Toxicity                                                                               |
| A03924 | Mutagenicity                                                                                 |
| A03925 | Acute Toxicity                                                                               |
| A03926 | Mutagenicity                                                                                 |
| A03927 | Acute Toxicity                                                                               |
| A03928 | Mutagenicity                                                                                 |
| A03929 | Acute Toxicity, Mutagenicity, Tumorigenicity, Reproductive Effects                           |
| A03930 | Acute Toxicity                                                                               |
| A03931 | Acute Toxicity, Skin and Eye Irritation, Multiple Dose Effects                               |
| A03932 | Acute Toxicity                                                                               |
| A03933 | Acute Toxicity, Mutagenicity                                                                 |
| A03934 | Mutagenicity                                                                                 |
| A03935 | Acute Toxicity, Skin and Eye Irritation                                                      |
| A03936 | Acute Toxicity                                                                               |
| A03937 | Skin and Eye Irritation                                                                      |
| A03938 | Acute Toxicity                                                                               |
| A03939 | Non-toxicity                                                                                 |
| A03940 | Mutagenicity                                                                                 |
| A03941 | Reproductive Effects                                                                         |
| A03942 | Acute Toxicity, Mutagenicity                                                                 |
| A03943 | Acute Toxicity                                                                               |
| A03944 | Acute Toxicity, Multiple Dose Effects                                                        |
| A03945 | Acute Toxicity, Mutagenicity, Skin and Eye Irritation                                        |
| A03946 | Acute Toxicity                                                                               |
| A03947 | Mutagenicity, Tumorigenicity                                                                 |
| A03948 | Acute Toxicity, Mutagenicity, Tumorigenicity, Skin and Eye Irritation, Multiple Dose Effects |
| A03949 | Acute Toxicity, Mutagenicity, Skin and Eye Irritation                                        |
| A03950 | Acute Toxicity, Multiple Dose Effects                                                        |
| A03951 | Acute Toxicity                                                                               |
| A03952 | Acute Toxicity                                                                               |
| A03953 | Acute Toxicity                                                                               |
| A03954 | Acute Toxicity                                                                               |
| A03955 | Mutagenicity, Reproductive Effects                                                           |
| A03956 | Acute Toxicity                                                                               |
| A03957 | Reproductive Effects                                                                         |

|        |                                                                                                    |
|--------|----------------------------------------------------------------------------------------------------|
| A03958 | Acute Toxicity, Skin and Eye Irritation                                                            |
| A03959 | Acute Toxicity, Multiple Dose Effects                                                              |
| A03960 | Acute Toxicity                                                                                     |
| A03961 | Acute Toxicity, Mutagenicity, Skin and Eye Irritation                                              |
| A03962 | Acute Toxicity, Skin and Eye Irritation, Multiple Dose Effects                                     |
| A03963 | Acute Toxicity, Mutagenicity                                                                       |
| A03964 | Acute Toxicity, Mutagenicity, Tumorigenicity, Skin and Eye Irritation, Multiple Dose Effects       |
| A03965 | Acute Toxicity                                                                                     |
| A03966 | Acute Toxicity, Mutagenicity, Skin and Eye Irritation, Multiple Dose Effects                       |
| A03967 | Acute Toxicity                                                                                     |
| A03968 | Acute Toxicity, Mutagenicity, Skin and Eye Irritation, Reproductive Effects, Multiple Dose Effects |
| A03969 | Reproductive Effects                                                                               |
| A03970 | Acute Toxicity                                                                                     |
| A03971 | Acute Toxicity                                                                                     |
| A03972 | Acute Toxicity                                                                                     |
| A03973 | Acute Toxicity                                                                                     |
| A03974 | Acute Toxicity, Mutagenicity, Tumorigenicity, Skin and Eye Irritation, Multiple Dose Effects       |
| A03975 | Acute Toxicity                                                                                     |
| A03976 | Acute Toxicity                                                                                     |
| A03977 | Skin and Eye Irritation                                                                            |
| A03978 | Acute Toxicity, Mutagenicity                                                                       |
| A03979 | Acute Toxicity, Skin and Eye Irritation                                                            |
| A03980 | Acute Toxicity, Skin and Eye Irritation                                                            |
| A03981 | Acute Toxicity, Mutagenicity, Reproductive Effects, Multiple Dose Effects                          |
| A03982 | Acute Toxicity                                                                                     |
| A03983 | Acute Toxicity                                                                                     |
| A03984 | Acute Toxicity, Mutagenicity, Tumorigenicity, Reproductive Effects,                                |
| A03985 | Tumorigenicity, Skin and Eye Irritation                                                            |
| A03986 | Acute Toxicity                                                                                     |
| A03987 | Acute Toxicity, Skin and Eye Irritation                                                            |
| A03988 | Tumorigenicity                                                                                     |
| A03989 | Acute Toxicity, Mutagenicity                                                                       |
| A03990 | Acute Toxicity, Skin and Eye Irritation, Multiple Dose Effects                                     |
| A03991 | Acute Toxicity, Multiple Dose Effects                                                              |
| A03992 | Acute Toxicity, Mutagenicity                                                                       |
| A03993 | Acute Toxicity, Mutagenicity                                                                       |
| A03994 | Acute Toxicity, Skin and Eye Irritation                                                            |
| A03995 | Acute Toxicity, Skin and Eye Irritation                                                            |
| A03996 | Acute Toxicity                                                                                     |
| A03997 | Acute Toxicity                                                                                     |
| A03998 | Skin and Eye Irritation                                                                            |
| A03999 | Acute Toxicity                                                                                     |
| A04000 | Acute Toxicity                                                                                     |

|        |                                                                                                    |
|--------|----------------------------------------------------------------------------------------------------|
| A04001 | Acute Toxicity, Mutagenicity                                                                       |
| A04002 | Acute Toxicity, Tumorigenicity                                                                     |
| A04003 | Acute Toxicity                                                                                     |
| A04004 | Acute Toxicity, Mutagenicity, Tumorigenicity                                                       |
| A04005 | Acute Toxicity, Multiple Dose Effects                                                              |
| A04006 | Reproductive Effects                                                                               |
| A04007 | Acute Toxicity                                                                                     |
| A04008 | Acute Toxicity                                                                                     |
| A04009 | Acute Toxicity, Mutagenicity, Multiple Dose Effects                                                |
| A04010 | Acute Toxicity, Mutagenicity, Multiple Dose Effects                                                |
| A04011 | Acute Toxicity, Mutagenicity, Skin and Eye Irritation, Reproductive Effects, Multiple Dose Effects |
| A04012 | Acute Toxicity, Multiple Dose Effects                                                              |
| A04013 | Acute Toxicity                                                                                     |
| A04014 | Acute Toxicity                                                                                     |
| A04015 | Acute Toxicity                                                                                     |
| A04016 | Acute Toxicity, Multiple Dose Effects                                                              |
| A04017 | Acute Toxicity                                                                                     |
| A04018 | Acute Toxicity, Skin and Eye Irritation                                                            |
| A04019 | Acute Toxicity                                                                                     |
| A04020 | Acute Toxicity, Mutagenicity, Reproductive Effects                                                 |
| A04021 | Acute Toxicity                                                                                     |
| A04022 | Acute Toxicity                                                                                     |
| A04023 | Acute Toxicity, Mutagenicity, Multiple Dose Effects                                                |
| A04024 | Acute Toxicity                                                                                     |
| A04025 | Acute Toxicity, Skin and Eye Irritation                                                            |
| A04026 | Mutagenicity                                                                                       |
| A04027 | Acute Toxicity, Multiple Dose Effects                                                              |
| A04028 | Acute Toxicity, Mutagenicity, Tumorigenicity, Multiple Dose Effects                                |
| A04029 | Acute Toxicity                                                                                     |
| A04030 | Acute Toxicity, Skin and Eye Irritation, Multiple Dose Effects                                     |
| A04031 | Acute Toxicity, Mutagenicity, Tumorigenicity                                                       |
| A04032 | Acute Toxicity                                                                                     |
| A04033 | Acute Toxicity, Mutagenicity, Tumorigenicity, Multiple Dose Effects                                |
| A04034 | Mutagenicity                                                                                       |
| A04035 | Acute Toxicity, Mutagenicity, Tumorigenicity, Multiple Dose Effects                                |
| A04036 | Acute Toxicity, Multiple Dose Effects                                                              |
| A04037 | Acute Toxicity                                                                                     |
| A04038 | Non-toxicity                                                                                       |
| A04039 | Acute Toxicity, Skin and Eye Irritation                                                            |
| A04040 | Acute Toxicity, Multiple Dose Effects                                                              |
| A04041 | Acute Toxicity, Mutagenicity                                                                       |
| A04042 | Acute Toxicity                                                                                     |
| A04043 | Mutagenicity                                                                                       |
| A04044 | Acute Toxicity                                                                                     |
| A04045 | Acute Toxicity                                                                                     |

|        |                                                                              |
|--------|------------------------------------------------------------------------------|
| A04046 | Acute Toxicity                                                               |
| A04047 | Acute Toxicity, Mutagenicity, Multiple Dose Effects                          |
| A04048 | Acute Toxicity, Mutagenicity, Multiple Dose Effects                          |
| A04049 | Acute Toxicity, Skin and Eye Irritation                                      |
| A04050 | Acute Toxicity, Mutagenicity, Skin and Eye Irritation                        |
| A04051 | Acute Toxicity, Tumorigenicity, Skin and Eye Irritation, Multiple Dose       |
| A04052 | Acute Toxicity                                                               |
| A04053 | Acute Toxicity, Mutagenicity, Skin and Eye Irritation, Reproductive Effects  |
| A04054 | Acute Toxicity, Mutagenicity, Tumorigenicity, Reproductive Effects           |
| A04055 | Multiple Dose Effects                                                        |
| A04056 | Acute Toxicity                                                               |
| A04057 | Acute Toxicity                                                               |
| A04058 | Acute Toxicity, Reproductive Effects                                         |
| A04059 | Acute Toxicity                                                               |
| A04060 | Acute Toxicity                                                               |
| A04061 | Acute Toxicity                                                               |
| A04062 | Acute Toxicity, Mutagenicity                                                 |
| A04063 | Mutagenicity, Tumorigenicity                                                 |
| A04064 | Mutagenicity                                                                 |
| A04065 | Acute Toxicity                                                               |
| A04066 | Acute Toxicity                                                               |
| A04067 | Acute Toxicity                                                               |
| A04068 | Acute Toxicity                                                               |
| A04069 | Acute Toxicity, Multiple Dose Effects                                        |
| A04070 | Mutagenicity                                                                 |
| A04071 | Acute Toxicity                                                               |
| A04072 | Acute Toxicity, Mutagenicity, Tumorigenicity, Multiple Dose Effects          |
| A04073 | Acute Toxicity, Tumorigenicity                                               |
| A04074 | Mutagenicity                                                                 |
| A04075 | Acute Toxicity, Mutagenicity, Skin and Eye Irritation, Multiple Dose Effects |
| A04076 | Acute Toxicity, Multiple Dose Effects                                        |
| A04077 | Acute Toxicity                                                               |
| A04078 | Acute Toxicity, Mutagenicity                                                 |
| A04079 | Acute Toxicity, Mutagenicity                                                 |
| A04080 | Acute Toxicity, Mutagenicity                                                 |
| A04081 | Acute Toxicity, Mutagenicity, Multiple Dose Effects                          |
| A04082 | Acute Toxicity, Tumorigenicity                                               |
| A04083 | Acute Toxicity                                                               |
| A04084 | Acute Toxicity, Multiple Dose Effects                                        |
| A04085 | Acute Toxicity                                                               |
| A04086 | Acute Toxicity, Mutagenicity                                                 |
| A04087 | Acute Toxicity, Mutagenicity                                                 |
| A04088 | Acute Toxicity, Skin and Eye Irritation                                      |
| A04089 | Acute Toxicity, Mutagenicity                                                 |
| A04090 | Acute Toxicity                                                               |
| A04091 | Acute Toxicity, Reproductive Effects                                         |

|        |                                                                                                    |
|--------|----------------------------------------------------------------------------------------------------|
| A04092 | Acute Toxicity, Mutagenicity, Skin and Eye Irritation                                              |
| A04093 | Acute Toxicity                                                                                     |
| A04094 | Mutagenicity                                                                                       |
| A04095 | Acute Toxicity, Reproductive Effects                                                               |
| A04096 | Skin and Eye Irritation                                                                            |
| A04097 | Acute Toxicity, Tumorigenicity, Skin and Eye Irritation                                            |
| A04098 | Acute Toxicity                                                                                     |
| A04099 | Reproductive Effects                                                                               |
| A04100 | Acute Toxicity, Multiple Dose Effects                                                              |
| A04101 | Acute Toxicity, Mutagenicity                                                                       |
| A04102 | Acute Toxicity, Mutagenicity                                                                       |
| A04103 | Acute Toxicity                                                                                     |
| A04104 | Non-toxicity                                                                                       |
| A04105 | Acute Toxicity, Mutagenicity, Tumorigenicity, Skin and Eye Irritation,                             |
| A04106 | Acute Toxicity                                                                                     |
| A04107 | Acute Toxicity, Mutagenicity                                                                       |
| A04108 | Acute Toxicity, Mutagenicity, Skin and Eye Irritation, Reproductive Effects, Multiple Dose Effects |
| A04109 | Acute Toxicity, Multiple Dose Effects                                                              |
| A04110 | Acute Toxicity, Skin and Eye Irritation, Reproductive Effects, Multiple Dose                       |
| A04111 | Acute Toxicity, Mutagenicity                                                                       |
| A04112 | Acute Toxicity                                                                                     |
| A04113 | Acute Toxicity, Skin and Eye Irritation                                                            |
| A04114 | Acute Toxicity                                                                                     |
| A04115 | Non-toxicity                                                                                       |
| A04116 | Acute Toxicity                                                                                     |
| A04117 | Acute Toxicity                                                                                     |
| A04118 | Acute Toxicity, Mutagenicity                                                                       |
| A04119 | Mutagenicity                                                                                       |
| A04120 | Acute Toxicity, Mutagenicity, Multiple Dose Effects                                                |
| A04121 | Acute Toxicity                                                                                     |
| A04122 | Acute Toxicity                                                                                     |
| A04123 | Mutagenicity                                                                                       |
| A04124 | Acute Toxicity, Reproductive Effects, Multiple Dose Effects                                        |
| A04125 | Acute Toxicity, Mutagenicity                                                                       |
| A04126 | Acute Toxicity                                                                                     |
| A04127 | Acute Toxicity                                                                                     |
| A04128 | Acute Toxicity                                                                                     |
| A04129 | Multiple Dose Effects                                                                              |
| A04130 | Acute Toxicity, Mutagenicity, Tumorigenicity, Skin and Eye Irritation                              |
| A04131 | Acute Toxicity, Multiple Dose Effects                                                              |
| A04132 | Mutagenicity, Skin and Eye Irritation                                                              |
| A04133 | Acute Toxicity, Mutagenicity, Tumorigenicity, Reproductive Effects,                                |
| A04134 | Mutagenicity                                                                                       |
| A04135 | Acute Toxicity, Mutagenicity, Tumorigenicity, Multiple Dose Effects                                |
| A04136 | Mutagenicity                                                                                       |

|        |                                                                                                    |
|--------|----------------------------------------------------------------------------------------------------|
| A04137 | Mutagenicity                                                                                       |
| A04138 | Acute Toxicity, Mutagenicity, Skin and Eye Irritation, Reproductive Effects, Multiple Dose Effects |
| A04139 | Acute Toxicity, Mutagenicity, Tumorigenicity, Skin and Eye Irritation,                             |
| A04140 | Acute Toxicity, Mutagenicity                                                                       |
| A04141 | Reproductive Effects                                                                               |
| A04142 | Multiple Dose Effects                                                                              |
| A04143 | Multiple Dose Effects                                                                              |
| A04144 | Acute Toxicity, Multiple Dose Effects                                                              |
| A04145 | Tumorigenicity, Reproductive Effects, Multiple Dose Effects                                        |
| A04146 | Acute Toxicity, Skin and Eye Irritation                                                            |
| A04147 | Acute Toxicity                                                                                     |
| A04148 | Acute Toxicity                                                                                     |
| A04149 | Mutagenicity, Tumorigenicity                                                                       |
| A04150 | Acute Toxicity, Mutagenicity, Tumorigenicity, Reproductive Effects                                 |
| A04151 | Acute Toxicity, Mutagenicity, Tumorigenicity, Reproductive Effects                                 |
| A04152 | Acute Toxicity, Mutagenicity                                                                       |
| A04153 | Acute Toxicity                                                                                     |
| A04154 | Mutagenicity                                                                                       |
| A04155 | Acute Toxicity, Skin and Eye Irritation                                                            |
| A04156 | Acute Toxicity                                                                                     |
| A04157 | Acute Toxicity, Mutagenicity                                                                       |
| A04158 | Acute Toxicity                                                                                     |
| A04159 | Mutagenicity                                                                                       |
| A04160 | Acute Toxicity                                                                                     |
| A04161 | Reproductive Effects                                                                               |
| A04162 | Acute Toxicity, Mutagenicity                                                                       |
| A04163 | Acute Toxicity, Mutagenicity, Tumorigenicity, Skin and Eye Irritation,                             |
| A04164 | Acute Toxicity                                                                                     |
| A04165 | Mutagenicity                                                                                       |
| A04166 | Mutagenicity                                                                                       |
| A04167 | Acute Toxicity, Mutagenicity                                                                       |
| A04168 | Acute Toxicity, Mutagenicity                                                                       |
| A04169 | Acute Toxicity                                                                                     |
| A04170 | Acute Toxicity                                                                                     |
| A04171 | Acute Toxicity, Mutagenicity                                                                       |
| A04172 | Acute Toxicity, Mutagenicity                                                                       |
| A04173 | Acute Toxicity                                                                                     |
| A04174 | Mutagenicity, Reproductive Effects                                                                 |
| A04175 | Non-toxicity                                                                                       |
| A04176 | Mutagenicity                                                                                       |
| A04177 | Acute Toxicity                                                                                     |
| A04178 | Acute Toxicity                                                                                     |
| A04179 | Acute Toxicity, Mutagenicity, Skin and Eye Irritation, Reproductive Effects, Multiple Dose Effects |
| A04180 | Acute Toxicity                                                                                     |



|        |                                                                                              |
|--------|----------------------------------------------------------------------------------------------|
| A04181 | Acute Toxicity                                                                               |
| A04182 | Mutagenicity                                                                                 |
| A04183 | Mutagenicity                                                                                 |
| A04184 | Acute Toxicity, Mutagenicity                                                                 |
| A04185 | Acute Toxicity, Mutagenicity                                                                 |
| A04186 | Mutagenicity                                                                                 |
| A04187 | Mutagenicity                                                                                 |
| A04188 | Acute Toxicity                                                                               |
| A04189 | Acute Toxicity, Mutagenicity                                                                 |
| A04190 | Acute Toxicity, Mutagenicity                                                                 |
| A04191 | Mutagenicity                                                                                 |
| A04192 | Acute Toxicity, Mutagenicity                                                                 |
| A04193 | Acute Toxicity, Mutagenicity, Tumorigenicity                                                 |
| A04194 | Acute Toxicity                                                                               |
| A04195 | Mutagenicity                                                                                 |
| A04196 | Acute Toxicity                                                                               |
| A04197 | Acute Toxicity                                                                               |
| A04198 | Acute Toxicity                                                                               |
| A04199 | Acute Toxicity                                                                               |
| A04200 | Acute Toxicity                                                                               |
| A04201 | Acute Toxicity                                                                               |
| A04202 | Mutagenicity                                                                                 |
| A04203 | Mutagenicity                                                                                 |
| A04204 | Mutagenicity                                                                                 |
| A04205 | Acute Toxicity                                                                               |
| A04206 | Acute Toxicity, Skin and Eye Irritation                                                      |
| A04207 | Acute Toxicity                                                                               |
| A04208 | Acute Toxicity, Tumorigenicity                                                               |
| A04209 | Acute Toxicity                                                                               |
| A04210 | Mutagenicity                                                                                 |
| A04211 | Acute Toxicity, Mutagenicity, Multiple Dose Effects                                          |
| A04212 | Acute Toxicity, Mutagenicity, Tumorigenicity, Skin and Eye Irritation, Multiple Dose Effects |
| A04213 | Acute Toxicity, Mutagenicity                                                                 |
| A04214 | Mutagenicity                                                                                 |
| A04215 | Acute Toxicity                                                                               |
| A04216 | Acute Toxicity                                                                               |
| A04217 | Acute Toxicity, Skin and Eye Irritation                                                      |
| A04218 | Acute Toxicity                                                                               |
| A04219 | Acute Toxicity                                                                               |
| A04220 | Mutagenicity                                                                                 |
| A04221 | Acute Toxicity                                                                               |
| A04222 | Multiple Dose Effects                                                                        |
| A04223 | Acute Toxicity                                                                               |
| A04224 | Acute Toxicity                                                                               |
| A04225 | Acute Toxicity                                                                               |

|        |                                                                                                    |
|--------|----------------------------------------------------------------------------------------------------|
| A04226 | Mutagenicity                                                                                       |
| A04227 | Mutagenicity                                                                                       |
| A04228 | Acute Toxicity, Mutagenicity                                                                       |
| A04229 | Acute Toxicity                                                                                     |
| A04230 | Non-toxicity                                                                                       |
| A04231 | Acute Toxicity                                                                                     |
| A04232 | Reproductive Effects                                                                               |
| A04233 | Acute Toxicity                                                                                     |
| A04234 | Acute Toxicity                                                                                     |
| A04235 | Acute Toxicity, Reproductive Effects                                                               |
| A04236 | Acute Toxicity, Mutagenicity                                                                       |
| A04237 | Acute Toxicity, Mutagenicity, Skin and Eye Irritation                                              |
| A04238 | Acute Toxicity, Skin and Eye Irritation                                                            |
| A04239 | Acute Toxicity, Mutagenicity, Tumorigenicity, Reproductive Effects                                 |
| A04240 | Acute Toxicity, Multiple Dose Effects                                                              |
| A04241 | Mutagenicity                                                                                       |
| A04242 | Acute Toxicity                                                                                     |
| A04243 | Acute Toxicity, Multiple Dose Effects                                                              |
| A04244 | Acute Toxicity, Skin and Eye Irritation, Multiple Dose Effects                                     |
| A04245 | Acute Toxicity, Skin and Eye Irritation, Reproductive Effects, Multiple Dose                       |
| A04246 | Mutagenicity, Reproductive Effects, Multiple Dose Effects                                          |
| A04247 | Acute Toxicity                                                                                     |
| A04248 | Acute Toxicity, Mutagenicity, Skin and Eye Irritation                                              |
| A04249 | Acute Toxicity, Mutagenicity, Tumorigenicity                                                       |
| A04250 | Skin and Eye Irritation                                                                            |
| A04251 | Acute Toxicity, Tumorigenicity                                                                     |
| A04252 | Acute Toxicity, Mutagenicity, Tumorigenicity                                                       |
| A04253 | Acute Toxicity                                                                                     |
| A04254 | Acute Toxicity                                                                                     |
| A04255 | Acute Toxicity                                                                                     |
| A04256 | Acute Toxicity, Mutagenicity, Skin and Eye Irritation, Reproductive Effects, Multiple Dose Effects |
| A04257 | Mutagenicity                                                                                       |
| A04258 | Acute Toxicity, Mutagenicity, Reproductive Effects, Multiple Dose Effects                          |
| A04259 | Acute Toxicity                                                                                     |
| A04260 | Acute Toxicity                                                                                     |
| A04261 | Acute Toxicity, Mutagenicity, Tumorigenicity                                                       |
| A04262 | Acute Toxicity, Multiple Dose Effects                                                              |
| A04263 | Acute Toxicity, Mutagenicity, Skin and Eye Irritation, Reproductive Effects, Multiple Dose Effects |
| A04264 | Acute Toxicity, Skin and Eye Irritation, Multiple Dose Effects                                     |
| A04265 | Acute Toxicity, Mutagenicity, Tumorigenicity                                                       |
| A04266 | Acute Toxicity, Mutagenicity, Tumorigenicity, Reproductive Effects                                 |
| A04267 | Acute Toxicity, Multiple Dose Effects                                                              |
| A04268 | Acute Toxicity                                                                                     |
| A04269 | Acute Toxicity                                                                                     |

|        |                                                                                                 |
|--------|-------------------------------------------------------------------------------------------------|
| A04270 | Acute Toxicity, Skin and Eye Irritation, Multiple Dose Effects                                  |
| A04271 | Acute Toxicity                                                                                  |
| A04272 | Acute Toxicity, Multiple Dose Effects                                                           |
| A04273 | Mutagenicity, Multiple Dose Effects                                                             |
| A04274 | Acute Toxicity                                                                                  |
| A04275 | Acute Toxicity, Mutagenicity, Tumorigenicity, Multiple Dose Effects                             |
| A04276 | Acute Toxicity                                                                                  |
| A04277 | Acute Toxicity                                                                                  |
| A04278 | Tumorigenicity                                                                                  |
| A04279 | Acute Toxicity, Mutagenicity, Tumorigenicity, Multiple Dose Effects                             |
| A04280 | Acute Toxicity, Skin and Eye Irritation                                                         |
| A04281 | Acute Toxicity, Mutagenicity, Tumorigenicity, Multiple Dose Effects                             |
| A04282 | Acute Toxicity, Mutagenicity                                                                    |
| A04283 | Acute Toxicity, Skin and Eye Irritation                                                         |
| A04284 | Acute Toxicity                                                                                  |
| A04285 | Acute Toxicity, Mutagenicity                                                                    |
| A04286 | Acute Toxicity, Skin and Eye Irritation, Multiple Dose Effects                                  |
| A04287 | Acute Toxicity                                                                                  |
| A04288 | Non-toxicity                                                                                    |
| A04289 | Mutagenicity                                                                                    |
| A04290 | Acute Toxicity, Mutagenicity                                                                    |
| A04291 | Acute Toxicity, Mutagenicity                                                                    |
| A04292 | Acute Toxicity, Mutagenicity, Tumorigenicity, Reproductive Effects,                             |
| A04293 | Non-toxicity                                                                                    |
| A04294 | Mutagenicity, Tumorigenicity, Multiple Dose Effects                                             |
| A04295 | Acute Toxicity                                                                                  |
| A04296 | Acute Toxicity, Mutagenicity, Tumorigenicity, Multiple Dose Effects                             |
| A04297 | Non-toxicity                                                                                    |
| A04298 | Acute Toxicity, Multiple Dose Effects                                                           |
| A04299 | Acute Toxicity, Multiple Dose Effects                                                           |
| A04300 | Acute Toxicity                                                                                  |
| A04301 | Acute Toxicity, Multiple Dose Effects                                                           |
| A04302 | Acute Toxicity                                                                                  |
| A04303 | Acute Toxicity, Mutagenicity, Skin and Eye Irritation                                           |
| A04304 | Mutagenicity                                                                                    |
| A04305 | Acute Toxicity, Mutagenicity                                                                    |
| A04306 | Acute Toxicity                                                                                  |
| A04307 | Acute Toxicity, Mutagenicity, Tumorigenicity, Skin and Eye Irritation,<br>Multiple Dose Effects |
| A04308 | Acute Toxicity, Skin and Eye Irritation, Multiple Dose Effects                                  |
| A04309 | Acute Toxicity                                                                                  |
| A04310 | Mutagenicity, Multiple Dose Effects                                                             |
| A04311 | Acute Toxicity, Multiple Dose Effects                                                           |
| A04312 | Acute Toxicity, Skin and Eye Irritation                                                         |
| A04313 | Acute Toxicity, Skin and Eye Irritation                                                         |
| A04314 | Acute Toxicity, Multiple Dose Effects                                                           |

|        |                                                                                              |
|--------|----------------------------------------------------------------------------------------------|
| A04315 | Acute Toxicity                                                                               |
| A04316 | Acute Toxicity, Mutagenicity                                                                 |
| A04317 | Acute Toxicity                                                                               |
| A04318 | Acute Toxicity, Mutagenicity, Multiple Dose Effects                                          |
| A04319 | Mutagenicity                                                                                 |
| A04320 | Acute Toxicity, Mutagenicity, Skin and Eye Irritation                                        |
| A04321 | Acute Toxicity, Mutagenicity, Tumorigenicity                                                 |
| A04322 | Acute Toxicity, Multiple Dose Effects                                                        |
| A04323 | Non-toxicity                                                                                 |
| A04324 | Acute Toxicity, Mutagenicity, Tumorigenicity                                                 |
| A04325 | Acute Toxicity                                                                               |
| A04326 | Acute Toxicity, Mutagenicity, Skin and Eye Irritation                                        |
| A04327 | Acute Toxicity                                                                               |
| A04328 | Mutagenicity                                                                                 |
| A04329 | Mutagenicity                                                                                 |
| A04330 | Mutagenicity                                                                                 |
| A04331 | Mutagenicity, Tumorigenicity                                                                 |
| A04332 | Acute Toxicity                                                                               |
| A04333 | Acute Toxicity, Mutagenicity                                                                 |
| A04334 | Acute Toxicity, Mutagenicity, Skin and Eye Irritation, Multiple Dose Effects                 |
| A04335 | Acute Toxicity                                                                               |
| A04336 | Mutagenicity                                                                                 |
| A04337 | Mutagenicity, Tumorigenicity, Multiple Dose Effects                                          |
| A04338 | Acute Toxicity, Tumorigenicity                                                               |
| A04339 | Acute Toxicity                                                                               |
| A04340 | Mutagenicity                                                                                 |
| A04341 | Acute Toxicity                                                                               |
| A04342 | Acute Toxicity                                                                               |
| A04343 | Acute Toxicity, Mutagenicity, Reproductive Effects                                           |
| A04344 | Mutagenicity                                                                                 |
| A04345 | Non-toxicity                                                                                 |
| A04346 | Acute Toxicity, Multiple Dose Effects                                                        |
| A04347 | Tumorigenicity                                                                               |
| A04348 | Acute Toxicity                                                                               |
| A04349 | Acute Toxicity, Mutagenicity, Tumorigenicity, Skin and Eye Irritation, Multiple Dose Effects |
| A04350 | Mutagenicity                                                                                 |
| A04351 | Acute Toxicity, Reproductive Effects                                                         |
| A04352 | Acute Toxicity, Mutagenicity                                                                 |
| A04353 | Mutagenicity                                                                                 |
| A04354 | Mutagenicity                                                                                 |
| A04355 | Acute Toxicity, Mutagenicity                                                                 |
| A04356 | Mutagenicity                                                                                 |
| A04357 | Skin and Eye Irritation                                                                      |
| A04358 | Mutagenicity, Tumorigenicity                                                                 |
| A04359 | Mutagenicity                                                                                 |

|        |                                                                           |
|--------|---------------------------------------------------------------------------|
| A04360 | Acute Toxicity, Mutagenicity, Tumorigenicity                              |
| A04361 | Acute Toxicity, Mutagenicity, Tumorigenicity, Multiple Dose Effects       |
| A04362 | Acute Toxicity, Mutagenicity, Multiple Dose Effects                       |
| A04363 | Acute Toxicity                                                            |
| A04364 | Acute Toxicity                                                            |
| A04365 | Acute Toxicity, Multiple Dose Effects                                     |
| A04366 | Acute Toxicity                                                            |
| A04367 | Acute Toxicity                                                            |
| A04368 | Acute Toxicity, Mutagenicity                                              |
| A04369 | Acute Toxicity, Mutagenicity, Reproductive Effects, Multiple Dose Effects |
| A04370 | Mutagenicity                                                              |
| A04371 | Acute Toxicity, Mutagenicity                                              |
| A04372 | Acute Toxicity, Mutagenicity, Tumorigenicity, Multiple Dose Effects       |
| A04373 | Acute Toxicity                                                            |
| A04374 | Mutagenicity                                                              |
| A04375 | Mutagenicity                                                              |
| A04376 | Mutagenicity                                                              |
| A04377 | Skin and Eye Irritation                                                   |
| A04378 | Acute Toxicity, Mutagenicity                                              |
| A04379 | Acute Toxicity, Multiple Dose Effects                                     |
| A04380 | Acute Toxicity                                                            |
| A04381 | Mutagenicity                                                              |
| A04382 | Mutagenicity                                                              |
| A04383 | Mutagenicity                                                              |
| A04384 | Acute Toxicity, Mutagenicity, Skin and Eye Irritation                     |
| A04385 | Mutagenicity                                                              |
| A04386 | Acute Toxicity, Mutagenicity, Tumorigenicity                              |
| A04387 | Acute Toxicity, Mutagenicity                                              |
| A04388 | Acute Toxicity                                                            |
| A04389 | Mutagenicity                                                              |
| A04390 | Acute Toxicity, Mutagenicity, Skin and Eye Irritation                     |
| A04391 | Acute Toxicity, Multiple Dose Effects                                     |
| A04392 | Mutagenicity, Skin and Eye Irritation                                     |
| A04393 | Mutagenicity                                                              |
| A04394 | Mutagenicity, Tumorigenicity                                              |
| A04395 | Mutagenicity, Tumorigenicity                                              |
| A04396 | Acute Toxicity, Mutagenicity                                              |
| A04397 | Acute Toxicity                                                            |
| A04398 | Acute Toxicity                                                            |
| A04399 | Acute Toxicity                                                            |
| A04400 | Acute Toxicity                                                            |
| A04401 | Acute Toxicity, Mutagenicity, Multiple Dose Effects                       |
| A04402 | Mutagenicity                                                              |
| A04403 | Mutagenicity                                                              |
| A04404 | Mutagenicity                                                              |
| A04405 | Mutagenicity, Skin and Eye Irritation                                     |

|        |                                                                                                       |
|--------|-------------------------------------------------------------------------------------------------------|
| A04406 | Acute Toxicity, Mutagenicity, Reproductive Effects                                                    |
| A04407 | Tumorigenicity                                                                                        |
| A04408 | Mutagenicity                                                                                          |
| A04409 | Mutagenicity                                                                                          |
| A04410 | Acute Toxicity, Mutagenicity, Tumorigenicity, Reproductive Effects,                                   |
| A04411 | Mutagenicity, Tumorigenicity                                                                          |
| A04412 | Tumorigenicity                                                                                        |
| A04413 | Mutagenicity, Tumorigenicity                                                                          |
| A04414 | Mutagenicity                                                                                          |
| A04415 | Tumorigenicity                                                                                        |
| A04416 | Acute Toxicity, Mutagenicity                                                                          |
| A04417 | Acute Toxicity, Tumorigenicity                                                                        |
| A04418 | Acute Toxicity, Mutagenicity, Tumorigenicity, Reproductive Effects                                    |
| A04419 | Acute Toxicity                                                                                        |
| A04420 | Acute Toxicity, Mutagenicity, Tumorigenicity, Skin and Eye Irritation,<br>Multiple Dose Effects       |
| A04421 | Acute Toxicity                                                                                        |
| A04422 | Non-toxicity                                                                                          |
| A04423 | Mutagenicity, Skin and Eye Irritation                                                                 |
| A04424 | Mutagenicity                                                                                          |
| A04425 | Acute Toxicity, Mutagenicity, Tumorigenicity, Reproductive Effects                                    |
| A04426 | Acute Toxicity                                                                                        |
| A04427 | Acute Toxicity                                                                                        |
| A04428 | Acute Toxicity                                                                                        |
| A04429 | Acute Toxicity, Mutagenicity, Reproductive Effects                                                    |
| A04430 | Acute Toxicity                                                                                        |
| A04431 | Acute Toxicity                                                                                        |
| A04432 | Acute Toxicity                                                                                        |
| A04433 | Acute Toxicity                                                                                        |
| A04434 | Acute Toxicity                                                                                        |
| A04435 | Acute Toxicity, Mutagenicity, Tumorigenicity, Reproductive Effects,                                   |
| A04436 | Acute Toxicity, Multiple Dose Effects                                                                 |
| A04437 | Acute Toxicity, Reproductive Effects                                                                  |
| A04438 | Mutagenicity, Skin and Eye Irritation                                                                 |
| A04439 | Acute Toxicity                                                                                        |
| A04440 | Acute Toxicity, Multiple Dose Effects                                                                 |
| A04441 | Mutagenicity                                                                                          |
| A04442 | Acute Toxicity, Skin and Eye Irritation                                                               |
| A04443 | Acute Toxicity, Mutagenicity, Skin and Eye Irritation                                                 |
| A04444 | Acute Toxicity                                                                                        |
| A04445 | Acute Toxicity, Mutagenicity                                                                          |
| A04446 | Acute Toxicity, Mutagenicity, Skin and Eye Irritation, Reproductive Effects,<br>Multiple Dose Effects |
| A04447 | Acute Toxicity                                                                                        |
| A04448 | Acute Toxicity                                                                                        |
| A04449 | Acute Toxicity, Mutagenicity, Tumorigenicity, Reproductive Effects,                                   |

|        |                                                                              |
|--------|------------------------------------------------------------------------------|
| A04450 | Acute Toxicity                                                               |
| A04451 | Mutagenicity                                                                 |
| A04452 | Acute Toxicity                                                               |
| A04453 | Acute Toxicity, Tumorigenicity                                               |
| A04454 | Acute Toxicity, Skin and Eye Irritation, Multiple Dose Effects               |
| A04455 | Acute Toxicity                                                               |
| A04456 | Acute Toxicity                                                               |
| A04457 | Acute Toxicity                                                               |
| A04458 | Acute Toxicity                                                               |
| A04459 | Acute Toxicity, Mutagenicity                                                 |
| A04460 | Mutagenicity                                                                 |
| A04461 | Acute Toxicity, Skin and Eye Irritation                                      |
| A04462 | Acute Toxicity                                                               |
| A04463 | Acute Toxicity                                                               |
| A04464 | Acute Toxicity, Mutagenicity, Skin and Eye Irritation                        |
| A04465 | Mutagenicity, Tumorigenicity                                                 |
| A04466 | Mutagenicity                                                                 |
| A04467 | Acute Toxicity, Mutagenicity                                                 |
| A04468 | Acute Toxicity                                                               |
| A04469 | Acute Toxicity                                                               |
| A04470 | Acute Toxicity                                                               |
| A04471 | Acute Toxicity                                                               |
| A04472 | Non-toxicity                                                                 |
| A04473 | Mutagenicity                                                                 |
| A04474 | Mutagenicity, Tumorigenicity                                                 |
| A04475 | Acute Toxicity, Mutagenicity                                                 |
| A04476 | Acute Toxicity, Skin and Eye Irritation                                      |
| A04477 | Acute Toxicity                                                               |
| A04478 | Acute Toxicity, Mutagenicity                                                 |
| A04479 | Acute Toxicity                                                               |
| A04480 | Acute Toxicity                                                               |
| A04481 | Acute Toxicity, Multiple Dose Effects                                        |
| A04482 | Mutagenicity                                                                 |
| A04483 | Acute Toxicity, Mutagenicity, Skin and Eye Irritation                        |
| A04484 | Acute Toxicity                                                               |
| A04485 | Acute Toxicity                                                               |
| A04486 | Mutagenicity, Skin and Eye Irritation                                        |
| A04487 | Acute Toxicity, Mutagenicity, Skin and Eye Irritation, Multiple Dose Effects |
| A04488 | Acute Toxicity                                                               |
| A04489 | Mutagenicity                                                                 |
| A04490 | Acute Toxicity                                                               |
| A04491 | Acute Toxicity, Mutagenicity                                                 |
| A04492 | Acute Toxicity, Mutagenicity                                                 |
| A04493 | Acute Toxicity, Mutagenicity, Tumorigenicity                                 |
| A04494 | Acute Toxicity                                                               |
| A04495 | Acute Toxicity, Reproductive Effects                                         |

|        |                                                                                                    |
|--------|----------------------------------------------------------------------------------------------------|
| A04496 | Mutagenicity                                                                                       |
| A04497 | Mutagenicity                                                                                       |
| A04498 | Mutagenicity                                                                                       |
| A04499 | Acute Toxicity, Skin and Eye Irritation                                                            |
| A04500 | Acute Toxicity                                                                                     |
| A04501 | Acute Toxicity, Skin and Eye Irritation                                                            |
| A04502 | Acute Toxicity, Mutagenicity, Tumorigenicity                                                       |
| A04503 | Acute Toxicity                                                                                     |
| A04504 | Acute Toxicity, Reproductive Effects                                                               |
| A04505 | Acute Toxicity, Mutagenicity                                                                       |
| A04506 | Acute Toxicity                                                                                     |
| A04507 | Acute Toxicity                                                                                     |
| A04508 | Acute Toxicity                                                                                     |
| A04509 | Acute Toxicity, Mutagenicity, Reproductive Effects, Multiple Dose Effects                          |
| A04510 | Acute Toxicity, Mutagenicity, Tumorigenicity, Skin and Eye Irritation,                             |
| A04511 | Acute Toxicity                                                                                     |
| A04512 | Acute Toxicity, Skin and Eye Irritation                                                            |
| A04513 | Mutagenicity                                                                                       |
| A04514 | Mutagenicity                                                                                       |
| A04515 | Acute Toxicity, Mutagenicity, Skin and Eye Irritation, Multiple Dose Effects                       |
| A04516 | Acute Toxicity, Skin and Eye Irritation                                                            |
| A04517 | Acute Toxicity                                                                                     |
| A04518 | Acute Toxicity                                                                                     |
| A04519 | Acute Toxicity, Skin and Eye Irritation                                                            |
| A04520 | Acute Toxicity                                                                                     |
| A04521 | Acute Toxicity, Skin and Eye Irritation                                                            |
| A04522 | Acute Toxicity                                                                                     |
| A04523 | Acute Toxicity, Mutagenicity                                                                       |
| A04524 | Acute Toxicity                                                                                     |
| A04525 | Acute Toxicity                                                                                     |
| A04526 | Acute Toxicity                                                                                     |
| A04527 | Acute Toxicity                                                                                     |
| A04528 | Acute Toxicity, Skin and Eye Irritation                                                            |
| A04529 | Acute Toxicity, Mutagenicity                                                                       |
| A04530 | Acute Toxicity, Mutagenicity, Multiple Dose Effects                                                |
| A04531 | Acute Toxicity, Mutagenicity                                                                       |
| A04532 | Acute Toxicity                                                                                     |
| A04533 | Acute Toxicity, Mutagenicity, Skin and Eye Irritation, Reproductive Effects, Multiple Dose Effects |
| A04534 | Acute Toxicity, Tumorigenicity                                                                     |
| A04535 | Acute Toxicity, Mutagenicity                                                                       |
| A04536 | Acute Toxicity, Mutagenicity, Skin and Eye Irritation, Reproductive Effects, Multiple Dose Effects |
| A04537 | Acute Toxicity                                                                                     |
| A04538 | Acute Toxicity, Multiple Dose Effects                                                              |
| A04539 | Acute Toxicity                                                                                     |



|        |                                                                              |
|--------|------------------------------------------------------------------------------|
| A04540 | Acute Toxicity, Mutagenicity, Reproductive Effects, Multiple Dose Effects    |
| A04541 | Acute Toxicity, Mutagenicity                                                 |
| A04542 | Acute Toxicity                                                               |
| A04543 | Acute Toxicity, Mutagenicity, Reproductive Effects                           |
| A04544 | Acute Toxicity                                                               |
| A04545 | Acute Toxicity, Mutagenicity                                                 |
| A04546 | Acute Toxicity, Skin and Eye Irritation                                      |
| A04547 | Acute Toxicity                                                               |
| A04548 | Acute Toxicity, Mutagenicity                                                 |
| A04549 | Acute Toxicity, Tumorigenicity                                               |
| A04550 | Acute Toxicity                                                               |
| A04551 | Acute Toxicity                                                               |
| A04552 | Acute Toxicity                                                               |
| A04553 | Acute Toxicity, Mutagenicity, Skin and Eye Irritation, Multiple Dose Effects |
| A04554 | Acute Toxicity                                                               |
| A04555 | Acute Toxicity, Multiple Dose Effects                                        |
| A04556 | Mutagenicity                                                                 |
| A04557 | Acute Toxicity, Tumorigenicity, Reproductive Effects                         |
| A04558 | Non-toxicity                                                                 |
| A04559 | Acute Toxicity                                                               |
| A04560 | Acute Toxicity, Mutagenicity                                                 |
| A04561 | Acute Toxicity, Mutagenicity                                                 |
| A04562 | Acute Toxicity                                                               |
| A04563 | Acute Toxicity                                                               |
| A04564 | Acute Toxicity, Skin and Eye Irritation                                      |
| A04565 | Acute Toxicity, Multiple Dose Effects                                        |
| A04566 | Acute Toxicity, Multiple Dose Effects                                        |
| A04567 | Acute Toxicity, Multiple Dose Effects                                        |
| A04568 | Acute Toxicity, Mutagenicity, Reproductive Effects, Multiple Dose Effects    |
| A04569 | Acute Toxicity, Mutagenicity, Tumorigenicity                                 |
| A04570 | Acute Toxicity                                                               |
| A04571 | Acute Toxicity, Mutagenicity, Tumorigenicity, Reproductive Effects           |
| A04572 | Acute Toxicity                                                               |
| A04573 | Mutagenicity                                                                 |
| A04574 | Acute Toxicity, Mutagenicity                                                 |
| A04575 | Mutagenicity                                                                 |
| A04576 | Acute Toxicity, Mutagenicity                                                 |
| A04577 | Acute Toxicity, Multiple Dose Effects                                        |
| A04578 | Acute Toxicity, Skin and Eye Irritation, Reproductive Effects, Multiple Dose |
| A04579 | Mutagenicity, Tumorigenicity                                                 |
| A04580 | Mutagenicity, Tumorigenicity                                                 |
| A04581 | Acute Toxicity                                                               |
| A04582 | Acute Toxicity                                                               |
| A04583 | Mutagenicity                                                                 |
| A04584 | Acute Toxicity, Multiple Dose Effects                                        |
| A04585 | Acute Toxicity, Mutagenicity, Multiple Dose Effects                          |

|        |                                                                                              |
|--------|----------------------------------------------------------------------------------------------|
| A04586 | Tumorigenicity                                                                               |
| A04587 | Reproductive Effects, Multiple Dose Effects                                                  |
| A04588 | Acute Toxicity                                                                               |
| A04589 | Acute Toxicity, Skin and Eye Irritation, Multiple Dose Effects                               |
| A04590 | Acute Toxicity                                                                               |
| A04591 | Acute Toxicity                                                                               |
| A04592 | Mutagenicity                                                                                 |
| A04593 | Acute Toxicity                                                                               |
| A04594 | Acute Toxicity, Skin and Eye Irritation                                                      |
| A04595 | Acute Toxicity, Mutagenicity, Tumorigenicity                                                 |
| A04596 | Acute Toxicity, Mutagenicity, Skin and Eye Irritation                                        |
| A04597 | Acute Toxicity                                                                               |
| A04598 | Mutagenicity                                                                                 |
| A04599 | Mutagenicity                                                                                 |
| A04600 | Acute Toxicity, Mutagenicity, Skin and Eye Irritation, Multiple Dose Effects                 |
| A04601 | Acute Toxicity, Skin and Eye Irritation, Reproductive Effects, Multiple Dose                 |
| A04602 | Acute Toxicity, Skin and Eye Irritation                                                      |
| A04603 | Multiple Dose Effects                                                                        |
| A04604 | Acute Toxicity                                                                               |
| A04605 | Acute Toxicity                                                                               |
| A04606 | Acute Toxicity                                                                               |
| A04607 | Acute Toxicity, Skin and Eye Irritation                                                      |
| A04608 | Acute Toxicity, Mutagenicity, Tumorigenicity, Skin and Eye Irritation, Multiple Dose Effects |
| A04609 | Acute Toxicity, Skin and Eye Irritation                                                      |
| A04610 | Acute Toxicity                                                                               |
| A04611 | Acute Toxicity, Skin and Eye Irritation                                                      |
| A04612 | Acute Toxicity                                                                               |
| A04613 | Non-toxicity                                                                                 |
| A04614 | Acute Toxicity                                                                               |
| A04615 | Acute Toxicity                                                                               |
| A04616 | Acute Toxicity                                                                               |
| A04617 | Acute Toxicity, Multiple Dose Effects                                                        |
| A04618 | Tumorigenicity                                                                               |
| A04619 | Mutagenicity                                                                                 |
| A04620 | Acute Toxicity, Mutagenicity, Tumorigenicity, Skin and Eye Irritation, Multiple Dose Effects |
| A04621 | Tumorigenicity                                                                               |
| A04622 | Acute Toxicity, Multiple Dose Effects                                                        |
| A04623 | Acute Toxicity, Mutagenicity, Tumorigenicity, Reproductive Effects,                          |
| A04624 | Acute Toxicity                                                                               |
| A04625 | Acute Toxicity                                                                               |
| A04626 | Acute Toxicity, Mutagenicity, Reproductive Effects                                           |
| A04627 | Acute Toxicity, Mutagenicity, Reproductive Effects, Multiple Dose Effects                    |
| A04628 | Acute Toxicity                                                                               |
| A04629 | Acute Toxicity, Mutagenicity, Skin and Eye Irritation, Multiple Dose Effects                 |

|        |                                                                                                    |
|--------|----------------------------------------------------------------------------------------------------|
| A04630 | Multiple Dose Effects                                                                              |
| A04631 | Mutagenicity                                                                                       |
| A04632 | Non-toxicity                                                                                       |
| A04633 | Acute Toxicity, Mutagenicity, Reproductive Effects, Multiple Dose Effects                          |
| A04634 | Mutagenicity                                                                                       |
| A04635 | Acute Toxicity, Mutagenicity, Reproductive Effects, Multiple Dose Effects                          |
| A04636 | Mutagenicity                                                                                       |
| A04637 | Acute Toxicity, Mutagenicity, Tumorigenicity, Multiple Dose Effects                                |
| A04638 | Acute Toxicity                                                                                     |
| A04639 | Non-toxicity                                                                                       |
| A04640 | Acute Toxicity                                                                                     |
| A04641 | Acute Toxicity, Skin and Eye Irritation, Reproductive Effects, Multiple Dose                       |
| A04642 | Acute Toxicity, Reproductive Effects, Multiple Dose Effects                                        |
| A04643 | Acute Toxicity                                                                                     |
| A04644 | Acute Toxicity                                                                                     |
| A04645 | Acute Toxicity, Multiple Dose Effects                                                              |
| A04646 | Mutagenicity                                                                                       |
| A04647 | Acute Toxicity, Multiple Dose Effects                                                              |
| A04648 | Multiple Dose Effects                                                                              |
| A04649 | Mutagenicity                                                                                       |
| A04650 | Acute Toxicity                                                                                     |
| A04651 | Reproductive Effects, Multiple Dose Effects                                                        |
| A04652 | Acute Toxicity, Mutagenicity, Skin and Eye Irritation, Reproductive Effects, Multiple Dose Effects |
| A04653 | Acute Toxicity, Multiple Dose Effects                                                              |
| A04654 | Acute Toxicity                                                                                     |
| A04655 | Acute Toxicity                                                                                     |
| A04656 | Acute Toxicity                                                                                     |
| A04657 | Acute Toxicity                                                                                     |
| A04658 | Acute Toxicity, Skin and Eye Irritation, Multiple Dose Effects                                     |
| A04659 | Acute Toxicity                                                                                     |
| A04660 | Acute Toxicity, Mutagenicity, Skin and Eye Irritation, Multiple Dose Effects                       |
| A04661 | Acute Toxicity, Mutagenicity, Reproductive Effects, Multiple Dose Effects                          |
| A04662 | Acute Toxicity                                                                                     |
| A04663 | Acute Toxicity                                                                                     |
| A04664 | Acute Toxicity                                                                                     |
| A04665 | Tumorigenicity                                                                                     |
| A04666 | Acute Toxicity, Skin and Eye Irritation, Multiple Dose Effects                                     |
| A04667 | Acute Toxicity, Mutagenicity, Tumorigenicity, Skin and Eye Irritation, Multiple Dose Effects       |
| A04668 | Acute Toxicity, Mutagenicity, Skin and Eye Irritation, Reproductive Effects, Multiple Dose Effects |
| A04669 | Acute Toxicity                                                                                     |
| A04670 | Mutagenicity                                                                                       |
| A04671 | Mutagenicity, Tumorigenicity, Multiple Dose Effects                                                |
| A04672 | Acute Toxicity                                                                                     |

|        |                                                                                                    |
|--------|----------------------------------------------------------------------------------------------------|
| A04673 | Acute Toxicity, Multiple Dose Effects                                                              |
| A04674 | Acute Toxicity                                                                                     |
| A04675 | Acute Toxicity                                                                                     |
| A04676 | Acute Toxicity                                                                                     |
| A04677 | Acute Toxicity                                                                                     |
| A04678 | Mutagenicity                                                                                       |
| A04679 | Acute Toxicity, Multiple Dose Effects                                                              |
| A04680 | Acute Toxicity                                                                                     |
| A04681 | Acute Toxicity, Mutagenicity, Skin and Eye Irritation, Reproductive Effects, Multiple Dose Effects |
| A04682 | Acute Toxicity, Skin and Eye Irritation                                                            |
| A04683 | Mutagenicity                                                                                       |
| A04684 | Acute Toxicity                                                                                     |
| A04685 | Non-toxicity                                                                                       |
| A04686 | Acute Toxicity, Tumorigenicity, Reproductive Effects, Multiple Dose Effects                        |
| A04687 | Acute Toxicity                                                                                     |
| A04688 | Acute Toxicity                                                                                     |
| A04689 | Acute Toxicity                                                                                     |
| A04690 | Acute Toxicity, Mutagenicity, Skin and Eye Irritation                                              |
| A04691 | Acute Toxicity                                                                                     |
| A04692 | Acute Toxicity, Mutagenicity                                                                       |
| A04693 | Acute Toxicity, Mutagenicity, Skin and Eye Irritation                                              |
| A04694 | Acute Toxicity                                                                                     |
| A04695 | Acute Toxicity, Reproductive Effects                                                               |
| A04696 | Acute Toxicity                                                                                     |
| A04697 | Acute Toxicity                                                                                     |
| A04698 | Acute Toxicity, Mutagenicity                                                                       |
| A04699 | Non-toxicity                                                                                       |
| A04700 | Acute Toxicity, Mutagenicity, Skin and Eye Irritation                                              |
| A04701 | Acute Toxicity                                                                                     |
| A04702 | Acute Toxicity                                                                                     |
| A04703 | Acute Toxicity                                                                                     |
| A04704 | Acute Toxicity, Mutagenicity, Skin and Eye Irritation                                              |
| A04705 | Acute Toxicity                                                                                     |
| A04706 | Acute Toxicity                                                                                     |
| A04707 | Acute Toxicity                                                                                     |
| A04708 | Acute Toxicity, Multiple Dose Effects                                                              |
| A04709 | Acute Toxicity                                                                                     |
| A04710 | Acute Toxicity, Mutagenicity, Tumorigenicity, Skin and Eye Irritation,                             |
| A04711 | Mutagenicity                                                                                       |
| A04712 | Acute Toxicity                                                                                     |
| A04713 | Acute Toxicity                                                                                     |
| A04714 | Acute Toxicity, Reproductive Effects, Multiple Dose Effects                                        |
| A04715 | Acute Toxicity, Mutagenicity, Tumorigenicity, Reproductive Effects,                                |
| A04716 | Acute Toxicity                                                                                     |
| A04717 | Acute Toxicity, Tumorigenicity                                                                     |

|        |                                                                                              |
|--------|----------------------------------------------------------------------------------------------|
| A04718 | Acute Toxicity                                                                               |
| A04719 | Mutagenicity                                                                                 |
| A04720 | Acute Toxicity, Mutagenicity, Tumorigenicity, Reproductive Effects                           |
| A04721 | Acute Toxicity                                                                               |
| A04722 | Acute Toxicity, Reproductive Effects                                                         |
| A04723 | Acute Toxicity                                                                               |
| A04724 | Acute Toxicity, Mutagenicity, Multiple Dose Effects                                          |
| A04725 | Acute Toxicity                                                                               |
| A04726 | Acute Toxicity, Skin and Eye Irritation                                                      |
| A04727 | Acute Toxicity                                                                               |
| A04728 | Acute Toxicity, Mutagenicity, Skin and Eye Irritation, Multiple Dose Effects                 |
| A04729 | Acute Toxicity, Mutagenicity, Tumorigenicity, Skin and Eye Irritation, Multiple Dose Effects |
| A04730 | Acute Toxicity                                                                               |
| A04731 | Acute Toxicity, Skin and Eye Irritation                                                      |
| A04732 | Acute Toxicity, Mutagenicity                                                                 |
| A04733 | Acute Toxicity, Multiple Dose Effects                                                        |
| A04734 | Acute Toxicity                                                                               |
| A04735 | Acute Toxicity, Multiple Dose Effects                                                        |
| A04736 | Acute Toxicity, Multiple Dose Effects                                                        |
| A04737 | Acute Toxicity, Mutagenicity, Tumorigenicity, Reproductive Effects,                          |
| A04738 | Acute Toxicity                                                                               |
| A04739 | Acute Toxicity, Mutagenicity, Multiple Dose Effects                                          |
| A04740 | Acute Toxicity                                                                               |
| A04741 | Acute Toxicity, Skin and Eye Irritation                                                      |
| A04742 | Acute Toxicity, Skin and Eye Irritation, Reproductive Effects, Multiple Dose                 |
| A04743 | Mutagenicity                                                                                 |
| A04744 | Acute Toxicity                                                                               |
| A04745 | Acute Toxicity                                                                               |
| A04746 | Acute Toxicity                                                                               |
| A04747 | Mutagenicity, Skin and Eye Irritation                                                        |
| A04748 | Acute Toxicity, Skin and Eye Irritation                                                      |
| A04749 | Acute Toxicity, Reproductive Effects                                                         |
| A04750 | Acute Toxicity, Mutagenicity                                                                 |
| A04751 | Acute Toxicity                                                                               |
| A04752 | Acute Toxicity, Multiple Dose Effects                                                        |
| A04753 | Acute Toxicity                                                                               |
| A04754 | Acute Toxicity                                                                               |
| A04755 | Acute Toxicity, Skin and Eye Irritation                                                      |
| A04756 | Acute Toxicity, Mutagenicity, Skin and Eye Irritation                                        |
| A04757 | Acute Toxicity                                                                               |
| A04758 | Acute Toxicity, Multiple Dose Effects                                                        |
| A04759 | Acute Toxicity, Multiple Dose Effects                                                        |
| A04760 | Acute Toxicity                                                                               |
| A04761 | Acute Toxicity, Reproductive Effects                                                         |
| A04762 | Acute Toxicity                                                                               |

|        |                                                                                                 |
|--------|-------------------------------------------------------------------------------------------------|
| A04763 | Acute Toxicity                                                                                  |
| A04764 | Acute Toxicity, Mutagenicity                                                                    |
| A04765 | Acute Toxicity, Multiple Dose Effects                                                           |
| A04766 | Acute Toxicity, Skin and Eye Irritation                                                         |
| A04767 | Acute Toxicity                                                                                  |
| A04768 | Acute Toxicity                                                                                  |
| A04769 | Acute Toxicity                                                                                  |
| A04770 | Acute Toxicity, Tumorigenicity                                                                  |
| A04771 | Acute Toxicity                                                                                  |
| A04772 | Mutagenicity, Multiple Dose Effects                                                             |
| A04773 | Acute Toxicity                                                                                  |
| A04774 | Acute Toxicity                                                                                  |
| A04775 | Acute Toxicity                                                                                  |
| A04776 | Acute Toxicity, Mutagenicity, Multiple Dose Effects                                             |
| A04777 | Acute Toxicity                                                                                  |
| A04778 | Acute Toxicity, Reproductive Effects, Multiple Dose Effects                                     |
| A04779 | Acute Toxicity, Mutagenicity, Reproductive Effects, Multiple Dose Effects                       |
| A04780 | Acute Toxicity, Tumorigenicity, Multiple Dose Effects                                           |
| A04781 | Acute Toxicity, Tumorigenicity                                                                  |
| A04782 | Acute Toxicity, Mutagenicity, Reproductive Effects, Multiple Dose Effects                       |
| A04783 | Acute Toxicity, Mutagenicity, Tumorigenicity, Skin and Eye Irritation,                          |
| A04784 | Acute Toxicity, Skin and Eye Irritation, Reproductive Effects                                   |
| A04785 | Acute Toxicity                                                                                  |
| A04786 | Acute Toxicity                                                                                  |
| A04787 | Acute Toxicity, Mutagenicity, Tumorigenicity                                                    |
| A04788 | Acute Toxicity, Mutagenicity                                                                    |
| A04789 | Acute Toxicity, Reproductive Effects, Multiple Dose Effects                                     |
| A04790 | Acute Toxicity, Mutagenicity, Tumorigenicity, Reproductive Effects,                             |
| A04791 | Acute Toxicity, Mutagenicity, Multiple Dose Effects                                             |
| A04792 | Acute Toxicity, Mutagenicity, Reproductive Effects                                              |
| A04793 | Acute Toxicity                                                                                  |
| A04794 | Acute Toxicity, Reproductive Effects, Multiple Dose Effects                                     |
| A04795 | Acute Toxicity                                                                                  |
| A04796 | Acute Toxicity                                                                                  |
| A04797 | Acute Toxicity                                                                                  |
| A04798 | Acute Toxicity                                                                                  |
| A04799 | Acute Toxicity                                                                                  |
| A04800 | Acute Toxicity, Multiple Dose Effects                                                           |
| A04801 | Acute Toxicity, Skin and Eye Irritation, Multiple Dose Effects                                  |
| A04802 | Acute Toxicity, Multiple Dose Effects                                                           |
| A04803 | Acute Toxicity, Skin and Eye Irritation, Multiple Dose Effects                                  |
| A04804 | Acute Toxicity                                                                                  |
| A04805 | Acute Toxicity, Mutagenicity, Tumorigenicity, Skin and Eye Irritation,<br>Multiple Dose Effects |
| A04806 | Acute Toxicity, Skin and Eye Irritation                                                         |
| A04807 | Mutagenicity                                                                                    |

|        |                                                                                                    |
|--------|----------------------------------------------------------------------------------------------------|
| A04808 | Acute Toxicity, Skin and Eye Irritation                                                            |
| A04809 | Tumorigenicity                                                                                     |
| A04810 | Acute Toxicity                                                                                     |
| A04811 | Acute Toxicity                                                                                     |
| A04812 | Acute Toxicity                                                                                     |
| A04813 | Acute Toxicity                                                                                     |
| A04814 | Multiple Dose Effects                                                                              |
| A04815 | Acute Toxicity, Tumorigenicity                                                                     |
| A04816 | Acute Toxicity, Mutagenicity, Skin and Eye Irritation, Multiple Dose Effects                       |
| A04817 | Acute Toxicity                                                                                     |
| A04818 | Acute Toxicity                                                                                     |
| A04819 | Acute Toxicity                                                                                     |
| A04820 | Acute Toxicity                                                                                     |
| A04821 | Acute Toxicity                                                                                     |
| A04822 | Acute Toxicity                                                                                     |
| A04823 | Acute Toxicity                                                                                     |
| A04824 | Acute Toxicity                                                                                     |
| A04825 | Acute Toxicity                                                                                     |
| A04826 | Acute Toxicity, Skin and Eye Irritation                                                            |
| A04827 | Acute Toxicity, Reproductive Effects                                                               |
| A04828 | Mutagenicity                                                                                       |
| A04829 | Acute Toxicity                                                                                     |
| A04830 | Mutagenicity, Tumorigenicity                                                                       |
| A04831 | Acute Toxicity                                                                                     |
| A04832 | Acute Toxicity, Mutagenicity, Tumorigenicity                                                       |
| A04833 | Acute Toxicity                                                                                     |
| A04834 | Acute Toxicity, Mutagenicity, Multiple Dose Effects                                                |
| A04835 | Reproductive Effects, Multiple Dose Effects                                                        |
| A04836 | Acute Toxicity                                                                                     |
| A04837 | Acute Toxicity                                                                                     |
| A04838 | Acute Toxicity, Reproductive Effects, Multiple Dose Effects                                        |
| A04839 | Acute Toxicity, Mutagenicity, Reproductive Effects, Multiple Dose Effects                          |
| A04840 | Mutagenicity, Tumorigenicity                                                                       |
| A04841 | Mutagenicity                                                                                       |
| A04842 | Acute Toxicity                                                                                     |
| A04843 | Acute Toxicity, Mutagenicity, Skin and Eye Irritation, Reproductive Effects, Multiple Dose Effects |
| A04844 | Acute Toxicity, Reproductive Effects                                                               |
| A04845 | Acute Toxicity, Mutagenicity, Multiple Dose Effects                                                |
| A04846 | Acute Toxicity                                                                                     |
| A04847 | Acute Toxicity                                                                                     |
| A04848 | Acute Toxicity, Mutagenicity, Tumorigenicity, Reproductive Effects                                 |
| A04849 | Acute Toxicity, Mutagenicity                                                                       |
| A04850 | Acute Toxicity                                                                                     |
| A04851 | Acute Toxicity, Skin and Eye Irritation                                                            |
| A04852 | Acute Toxicity, Skin and Eye Irritation                                                            |

|        |                                                                                                       |
|--------|-------------------------------------------------------------------------------------------------------|
| A04853 | Acute Toxicity                                                                                        |
| A04854 | Acute Toxicity, Mutagenicity, Skin and Eye Irritation                                                 |
| A04855 | Skin and Eye Irritation                                                                               |
| A04856 | Acute Toxicity, Mutagenicity, Skin and Eye Irritation                                                 |
| A04857 | Acute Toxicity                                                                                        |
| A04858 | Acute Toxicity, Mutagenicity, Tumorigenicity, Reproductive Effects,                                   |
| A04859 | Acute Toxicity, Reproductive Effects                                                                  |
| A04860 | Acute Toxicity, Skin and Eye Irritation                                                               |
| A04861 | Acute Toxicity, Mutagenicity, Skin and Eye Irritation, Reproductive Effects,<br>Multiple Dose Effects |
| A04862 | Acute Toxicity, Multiple Dose Effects                                                                 |
| A04863 | Acute Toxicity                                                                                        |
| A04864 | Non-toxicity                                                                                          |
| A04865 | Acute Toxicity, Multiple Dose Effects                                                                 |
| A04866 | Mutagenicity                                                                                          |
| A04867 | Acute Toxicity, Mutagenicity, Skin and Eye Irritation, Multiple Dose Effects                          |
| A04868 | Acute Toxicity                                                                                        |
| A04869 | Acute Toxicity, Mutagenicity                                                                          |
| A04870 | Mutagenicity, Multiple Dose Effects                                                                   |
| A04871 | Mutagenicity                                                                                          |
| A04872 | Acute Toxicity                                                                                        |
| A04873 | Acute Toxicity                                                                                        |
| A04874 | Mutagenicity                                                                                          |
| A04875 | Acute Toxicity, Skin and Eye Irritation                                                               |
| A04876 | Acute Toxicity                                                                                        |
| A04877 | Acute Toxicity, Mutagenicity, Tumorigenicity, Multiple Dose Effects                                   |
| A04878 | Acute Toxicity                                                                                        |
| A04879 | Acute Toxicity                                                                                        |
| A04880 | Mutagenicity                                                                                          |
| A04881 | Acute Toxicity, Multiple Dose Effects                                                                 |
| A04882 | Mutagenicity                                                                                          |
| A04883 | Acute Toxicity, Mutagenicity, Skin and Eye Irritation, Reproductive Effects,<br>Multiple Dose Effects |
| A04884 | Mutagenicity, Tumorigenicity                                                                          |
| A04885 | Acute Toxicity                                                                                        |
| A04886 | Acute Toxicity, Mutagenicity, Skin and Eye Irritation, Reproductive Effects,<br>Multiple Dose Effects |
| A04887 | Acute Toxicity                                                                                        |
| A04888 | Mutagenicity                                                                                          |
| A04889 | Mutagenicity, Tumorigenicity, Skin and Eye Irritation                                                 |
| A04890 | Mutagenicity                                                                                          |
| A04891 | Acute Toxicity                                                                                        |
| A04892 | Mutagenicity, Tumorigenicity                                                                          |
| A04893 | Reproductive Effects                                                                                  |
| A04894 | Reproductive Effects                                                                                  |
| A04895 | Acute Toxicity, Reproductive Effects, Multiple Dose Effects                                           |



|        |                                                                                                    |
|--------|----------------------------------------------------------------------------------------------------|
| A04896 | Acute Toxicity, Reproductive Effects                                                               |
| A04897 | Reproductive Effects                                                                               |
| A04898 | Acute Toxicity, Multiple Dose Effects                                                              |
| A04899 | Acute Toxicity                                                                                     |
| A04900 | Acute Toxicity                                                                                     |
| A04901 | Acute Toxicity                                                                                     |
| A04902 | Acute Toxicity, Mutagenicity, Skin and Eye Irritation, Reproductive Effects, Multiple Dose Effects |
| A04903 | Acute Toxicity, Mutagenicity, Tumorigenicity                                                       |
| A04904 | Acute Toxicity, Mutagenicity, Skin and Eye Irritation                                              |
| A04905 | Mutagenicity, Skin and Eye Irritation                                                              |
| A04906 | Acute Toxicity, Mutagenicity                                                                       |
| A04907 | Tumorigenicity                                                                                     |
| A04908 | Acute Toxicity, Mutagenicity, Tumorigenicity, Skin and Eye Irritation,                             |
| A04909 | Acute Toxicity                                                                                     |
| A04910 | Acute Toxicity, Skin and Eye Irritation                                                            |
| A04911 | Acute Toxicity, Mutagenicity, Skin and Eye Irritation, Multiple Dose Effects                       |
| A04912 | Acute Toxicity, Mutagenicity                                                                       |
| A04913 | Acute Toxicity, Multiple Dose Effects                                                              |
| A04914 | Non-toxicity                                                                                       |
| A04915 | Mutagenicity                                                                                       |
| A04916 | Acute Toxicity, Mutagenicity                                                                       |
| A04917 | Acute Toxicity                                                                                     |
| A04918 | Multiple Dose Effects                                                                              |
| A04919 | Multiple Dose Effects                                                                              |
| A04920 | Mutagenicity, Tumorigenicity                                                                       |
| A04921 | Mutagenicity                                                                                       |
| A04922 | Acute Toxicity, Multiple Dose Effects                                                              |
| A04923 | Mutagenicity                                                                                       |
| A04924 | Acute Toxicity                                                                                     |
| A04925 | Mutagenicity                                                                                       |
| A04926 | Mutagenicity                                                                                       |
| A04927 | Acute Toxicity, Tumorigenicity, Skin and Eye Irritation, Multiple Dose                             |
| A04928 | Mutagenicity, Tumorigenicity                                                                       |
| A04929 | Reproductive Effects                                                                               |
| A04930 | Acute Toxicity                                                                                     |
| A04931 | Acute Toxicity                                                                                     |
| A04932 | Acute Toxicity                                                                                     |
| A04933 | Mutagenicity                                                                                       |
| A04934 | Acute Toxicity                                                                                     |
| A04935 | Acute Toxicity                                                                                     |
| A04936 | Acute Toxicity                                                                                     |
| A04937 | Acute Toxicity, Mutagenicity                                                                       |
| A04938 | Acute Toxicity                                                                                     |
| A04939 | Acute Toxicity, Mutagenicity                                                                       |
| A04940 | Acute Toxicity, Mutagenicity, Multiple Dose Effects                                                |

|        |                                                                              |
|--------|------------------------------------------------------------------------------|
| A04941 | Acute Toxicity                                                               |
| A04942 | Acute Toxicity, Mutagenicity, Skin and Eye Irritation                        |
| A04943 | Acute Toxicity                                                               |
| A04944 | Acute Toxicity, Mutagenicity, Tumorigenicity, Reproductive Effects           |
| A04945 | Acute Toxicity, Mutagenicity, Tumorigenicity, Skin and Eye Irritation,       |
| A04946 | Acute Toxicity, Mutagenicity, Multiple Dose Effects                          |
| A04947 | Acute Toxicity, Mutagenicity, Tumorigenicity                                 |
| A04948 | Mutagenicity                                                                 |
| A04949 | Acute Toxicity, Mutagenicity, Tumorigenicity, Reproductive Effects           |
| A04950 | Acute Toxicity, Skin and Eye Irritation                                      |
| A04951 | Acute Toxicity                                                               |
| A04952 | Acute Toxicity, Skin and Eye Irritation                                      |
| A04953 | Mutagenicity                                                                 |
| A04954 | Acute Toxicity                                                               |
| A04955 | Acute Toxicity, Mutagenicity, Tumorigenicity                                 |
| A04956 | Acute Toxicity                                                               |
| A04957 | Acute Toxicity                                                               |
| A04958 | Acute Toxicity                                                               |
| A04959 | Acute Toxicity                                                               |
| A04960 | Acute Toxicity, Mutagenicity, Tumorigenicity, Multiple Dose Effects          |
| A04961 | Acute Toxicity                                                               |
| A04962 | Mutagenicity                                                                 |
| A04963 | Acute Toxicity, Mutagenicity, Skin and Eye Irritation                        |
| A04964 | Acute Toxicity, Mutagenicity, Tumorigenicity, Multiple Dose Effects          |
| A04965 | Acute Toxicity, Mutagenicity, Skin and Eye Irritation, Multiple Dose Effects |
| A04966 | Acute Toxicity                                                               |
| A04967 | Mutagenicity                                                                 |
| A04968 | Acute Toxicity                                                               |
| A04969 | Acute Toxicity                                                               |
| A04970 | Acute Toxicity                                                               |
| A04971 | Acute Toxicity, Mutagenicity, Skin and Eye Irritation                        |
| A04972 | Acute Toxicity, Mutagenicity, Tumorigenicity, Reproductive Effects           |
| A04973 | Acute Toxicity                                                               |
| A04974 | Acute Toxicity, Mutagenicity, Multiple Dose Effects                          |
| A04975 | Mutagenicity, Multiple Dose Effects                                          |
| A04976 | Tumorigenicity                                                               |
| A04977 | Acute Toxicity, Mutagenicity, Reproductive Effects                           |
| A04978 | Acute Toxicity, Mutagenicity, Skin and Eye Irritation, Multiple Dose Effects |
| A04979 | Acute Toxicity                                                               |
| A04980 | Acute Toxicity                                                               |
| A04981 | Acute Toxicity, Mutagenicity, Multiple Dose Effects                          |
| A04982 | Acute Toxicity                                                               |
| A04983 | Acute Toxicity                                                               |
| A04984 | Mutagenicity, Tumorigenicity                                                 |
| A04985 | Acute Toxicity, Mutagenicity, Tumorigenicity, Multiple Dose Effects          |
| A04986 | Acute Toxicity                                                               |

|        |                                                                                              |
|--------|----------------------------------------------------------------------------------------------|
| A04987 | Acute Toxicity                                                                               |
| A04988 | Acute Toxicity, Mutagenicity                                                                 |
| A04989 | Acute Toxicity                                                                               |
| A04990 | Acute Toxicity                                                                               |
| A04991 | Acute Toxicity, Skin and Eye Irritation                                                      |
| A04992 | Acute Toxicity, Skin and Eye Irritation                                                      |
| A04993 | Acute Toxicity                                                                               |
| A04994 | Mutagenicity, Tumorigenicity                                                                 |
| A04995 | Acute Toxicity, Mutagenicity                                                                 |
| A04996 | Acute Toxicity                                                                               |
| A04997 | Acute Toxicity                                                                               |
| A04998 | Acute Toxicity, Multiple Dose Effects                                                        |
| A04999 | Acute Toxicity                                                                               |
| A05000 | Mutagenicity                                                                                 |
| A05001 | Mutagenicity, Tumorigenicity                                                                 |
| A05002 | Acute Toxicity                                                                               |
| A05003 | Acute Toxicity, Mutagenicity                                                                 |
| A05004 | Acute Toxicity                                                                               |
| A05005 | Acute Toxicity                                                                               |
| A05006 | Acute Toxicity, Mutagenicity, Multiple Dose Effects                                          |
| A05007 | Acute Toxicity, Mutagenicity, Tumorigenicity, Skin and Eye Irritation, Multiple Dose Effects |
| A05008 | Mutagenicity, Reproductive Effects                                                           |
| A05009 | Mutagenicity, Skin and Eye Irritation                                                        |
| A05010 | Acute Toxicity, Mutagenicity                                                                 |
| A05011 | Acute Toxicity                                                                               |
| A05012 | Mutagenicity                                                                                 |
| A05013 | Acute Toxicity, Multiple Dose Effects                                                        |
| A05014 | Acute Toxicity, Mutagenicity, Multiple Dose Effects                                          |
| A05015 | Acute Toxicity, Mutagenicity                                                                 |
| A05016 | Acute Toxicity, Mutagenicity                                                                 |
| A05017 | Acute Toxicity                                                                               |
| A05018 | Acute Toxicity                                                                               |
| A05019 | Acute Toxicity                                                                               |
| A05020 | Mutagenicity                                                                                 |
| A05021 | Multiple Dose Effects                                                                        |
| A05022 | Mutagenicity, Tumorigenicity                                                                 |
| A05023 | Acute Toxicity, Reproductive Effects                                                         |
| A05024 | Multiple Dose Effects                                                                        |
| A05025 | Acute Toxicity, Reproductive Effects                                                         |
| A05026 | Acute Toxicity, Mutagenicity, Multiple Dose Effects                                          |
| A05027 | Acute Toxicity, Skin and Eye Irritation                                                      |
| A05028 | Acute Toxicity, Tumorigenicity, Reproductive Effects, Multiple Dose Effects                  |
| A05029 | Acute Toxicity                                                                               |
| A05030 | Acute Toxicity                                                                               |
| A05031 | Acute Toxicity, Mutagenicity, Tumorigenicity                                                 |

|        |                                                                                              |
|--------|----------------------------------------------------------------------------------------------|
| A05032 | Acute Toxicity                                                                               |
| A05033 | Mutagenicity                                                                                 |
| A05034 | Acute Toxicity, Mutagenicity, Tumorigenicity, Skin and Eye Irritation, Multiple Dose Effects |
| A05035 | Acute Toxicity, Skin and Eye Irritation                                                      |
| A05036 | Acute Toxicity, Skin and Eye Irritation                                                      |
| A05037 | Acute Toxicity                                                                               |
| A05038 | Acute Toxicity                                                                               |
| A05039 | Acute Toxicity, Skin and Eye Irritation                                                      |
| A05040 | Acute Toxicity, Multiple Dose Effects                                                        |
| A05041 | Acute Toxicity                                                                               |
| A05042 | Acute Toxicity                                                                               |
| A05043 | Acute Toxicity, Multiple Dose Effects                                                        |
| A05044 | Acute Toxicity                                                                               |
| A05045 | Acute Toxicity, Mutagenicity, Multiple Dose Effects                                          |
| A05046 | Acute Toxicity, Mutagenicity                                                                 |
| A05047 | Acute Toxicity                                                                               |
| A05048 | Acute Toxicity                                                                               |
| A05049 | Acute Toxicity                                                                               |
| A05050 | Acute Toxicity, Mutagenicity, Multiple Dose Effects                                          |
| A05051 | Acute Toxicity, Reproductive Effects, Multiple Dose Effects                                  |
| A05052 | Acute Toxicity, Skin and Eye Irritation                                                      |
| A05053 | Acute Toxicity                                                                               |
| A05054 | Mutagenicity                                                                                 |
| A05055 | Acute Toxicity, Mutagenicity, Multiple Dose Effects                                          |
| A05056 | Acute Toxicity                                                                               |
| A05057 | Acute Toxicity                                                                               |
| A05058 | Acute Toxicity                                                                               |
| A05059 | Acute Toxicity                                                                               |
| A05060 | Acute Toxicity                                                                               |
| A05061 | Reproductive Effects                                                                         |
| A05062 | Reproductive Effects                                                                         |
| A05063 | Mutagenicity                                                                                 |
| A05064 | Multiple Dose Effects                                                                        |
| A05065 | Acute Toxicity, Mutagenicity, Tumorigenicity                                                 |
| A05066 | Skin and Eye Irritation                                                                      |
| A05067 | Acute Toxicity                                                                               |
| A05068 | Acute Toxicity, Mutagenicity, Tumorigenicity                                                 |
| A05069 | Acute Toxicity, Skin and Eye Irritation                                                      |
| A05070 | Acute Toxicity                                                                               |
| A05071 | Acute Toxicity, Multiple Dose Effects                                                        |
| A05072 | Acute Toxicity, Multiple Dose Effects                                                        |
| A05073 | Acute Toxicity, Mutagenicity                                                                 |
| A05074 | Acute Toxicity                                                                               |
| A05075 | Acute Toxicity, Mutagenicity, Tumorigenicity, Skin and Eye Irritation, Multiple Dose Effects |

|        |                                                                              |
|--------|------------------------------------------------------------------------------|
| A05076 | Mutagenicity, Tumorigenicity                                                 |
| A05077 | Mutagenicity                                                                 |
| A05078 | Mutagenicity                                                                 |
| A05079 | Acute Toxicity, Multiple Dose Effects                                        |
| A05080 | Acute Toxicity, Tumorigenicity, Multiple Dose Effects                        |
| A05081 | Acute Toxicity                                                               |
| A05082 | Mutagenicity                                                                 |
| A05083 | Acute Toxicity                                                               |
| A05084 | Acute Toxicity                                                               |
| A05085 | Acute Toxicity                                                               |
| A05086 | Acute Toxicity                                                               |
| A05087 | Acute Toxicity, Mutagenicity, Tumorigenicity, Multiple Dose Effects          |
| A05088 | Acute Toxicity                                                               |
| A05089 | Acute Toxicity                                                               |
| A05090 | Non-toxicity                                                                 |
| A05091 | Mutagenicity                                                                 |
| A05092 | Acute Toxicity                                                               |
| A05093 | Acute Toxicity, Multiple Dose Effects                                        |
| A05094 | Acute Toxicity                                                               |
| A05095 | Acute Toxicity, Mutagenicity, Tumorigenicity                                 |
| A05096 | Acute Toxicity                                                               |
| A05097 | Acute Toxicity                                                               |
| A05098 | Acute Toxicity, Mutagenicity, Skin and Eye Irritation                        |
| A05099 | Acute Toxicity                                                               |
| A05100 | Acute Toxicity                                                               |
| A05101 | Acute Toxicity, Skin and Eye Irritation, Multiple Dose Effects               |
| A05102 | Acute Toxicity, Mutagenicity, Skin and Eye Irritation, Multiple Dose Effects |
| A05103 | Acute Toxicity, Mutagenicity, Tumorigenicity                                 |
| A05104 | Acute Toxicity                                                               |
| A05105 | Mutagenicity                                                                 |
| A05106 | Acute Toxicity, Mutagenicity, Tumorigenicity                                 |
| A05107 | Acute Toxicity                                                               |
| A05108 | Acute Toxicity, Skin and Eye Irritation                                      |
| A05109 | Acute Toxicity                                                               |
| A05110 | Acute Toxicity                                                               |
| A05111 | Acute Toxicity, Skin and Eye Irritation, Multiple Dose Effects               |
| A05112 | Acute Toxicity                                                               |
| A05113 | Acute Toxicity, Mutagenicity, Skin and Eye Irritation                        |
| A05114 | Acute Toxicity, Mutagenicity, Tumorigenicity, Skin and Eye Irritation,       |
| A05115 | Mutagenicity                                                                 |
| A05116 | Acute Toxicity, Mutagenicity                                                 |
| A05117 | Mutagenicity, Tumorigenicity                                                 |
| A05118 | Acute Toxicity                                                               |
| A05119 | Tumorigenicity                                                               |
| A05120 | Acute Toxicity, Mutagenicity                                                 |
| A05121 | Skin and Eye Irritation                                                      |

|        |                                                                           |
|--------|---------------------------------------------------------------------------|
| A05122 | Acute Toxicity, Mutagenicity                                              |
| A05123 | Acute Toxicity, Mutagenicity, Multiple Dose Effects                       |
| A05124 | Acute Toxicity, Mutagenicity                                              |
| A05125 | Acute Toxicity, Skin and Eye Irritation                                   |
| A05126 | Acute Toxicity, Multiple Dose Effects                                     |
| A05127 | Acute Toxicity, Multiple Dose Effects                                     |
| A05128 | Acute Toxicity, Mutagenicity, Tumorigenicity                              |
| A05129 | Acute Toxicity                                                            |
| A05130 | Acute Toxicity                                                            |
| A05131 | Tumorigenicity                                                            |
| A05132 | Mutagenicity                                                              |
| A05133 | Acute Toxicity                                                            |
| A05134 | Acute Toxicity                                                            |
| A05135 | Mutagenicity                                                              |
| A05136 | Acute Toxicity                                                            |
| A05137 | Acute Toxicity                                                            |
| A05138 | Acute Toxicity, Mutagenicity                                              |
| A05139 | Acute Toxicity                                                            |
| A05140 | Acute Toxicity, Mutagenicity, Tumorigenicity, Multiple Dose Effects       |
| A05141 | Acute Toxicity                                                            |
| A05142 | Acute Toxicity                                                            |
| A05143 | Acute Toxicity, Multiple Dose Effects                                     |
| A05144 | Acute Toxicity, Reproductive Effects                                      |
| A05145 | Acute Toxicity, Skin and Eye Irritation, Multiple Dose Effects            |
| A05146 | Acute Toxicity                                                            |
| A05147 | Acute Toxicity                                                            |
| A05148 | Mutagenicity                                                              |
| A05149 | Acute Toxicity                                                            |
| A05150 | Acute Toxicity, Skin and Eye Irritation, Multiple Dose Effects            |
| A05151 | Mutagenicity, Tumorigenicity                                              |
| A05152 | Acute Toxicity                                                            |
| A05153 | Acute Toxicity, Mutagenicity, Tumorigenicity, Skin and Eye Irritation,    |
| A05154 | Acute Toxicity                                                            |
| A05155 | Acute Toxicity, Mutagenicity, Tumorigenicity, Reproductive Effects        |
| A05156 | Acute Toxicity                                                            |
| A05157 | Acute Toxicity, Tumorigenicity, Skin and Eye Irritation, Multiple Dose    |
| A05158 | Acute Toxicity, Multiple Dose Effects                                     |
| A05159 | Acute Toxicity, Reproductive Effects                                      |
| A05160 | Acute Toxicity                                                            |
| A05161 | Acute Toxicity                                                            |
| A05162 | Acute Toxicity                                                            |
| A05163 | Acute Toxicity                                                            |
| A05164 | Acute Toxicity, Mutagenicity, Reproductive Effects, Multiple Dose Effects |
| A05165 | Acute Toxicity                                                            |
| A05166 | Acute Toxicity                                                            |
| A05167 | Acute Toxicity, Skin and Eye Irritation                                   |

|        |                                                                           |
|--------|---------------------------------------------------------------------------|
| A05168 | Acute Toxicity                                                            |
| A05169 | Acute Toxicity                                                            |
| A05170 | Acute Toxicity                                                            |
| A05171 | Acute Toxicity                                                            |
| A05172 | Acute Toxicity, Tumorigenicity                                            |
| A05173 | Acute Toxicity                                                            |
| A05174 | Acute Toxicity, Mutagenicity, Multiple Dose Effects                       |
| A05175 | Acute Toxicity                                                            |
| A05176 | Acute Toxicity, Mutagenicity                                              |
| A05177 | Acute Toxicity                                                            |
| A05178 | Acute Toxicity                                                            |
| A05179 | Acute Toxicity                                                            |
| A05180 | Mutagenicity                                                              |
| A05181 | Acute Toxicity                                                            |
| A05182 | Acute Toxicity                                                            |
| A05183 | Acute Toxicity, Mutagenicity                                              |
| A05184 | Acute Toxicity, Mutagenicity, Skin and Eye Irritation                     |
| A05185 | Acute Toxicity                                                            |
| A05186 | Mutagenicity                                                              |
| A05187 | Acute Toxicity                                                            |
| A05188 | Acute Toxicity                                                            |
| A05189 | Acute Toxicity, Skin and Eye Irritation                                   |
| A05190 | Acute Toxicity                                                            |
| A05191 | Acute Toxicity                                                            |
| A05192 | Mutagenicity, Tumorigenicity                                              |
| A05193 | Acute Toxicity                                                            |
| A05194 | Mutagenicity                                                              |
| A05195 | Acute Toxicity                                                            |
| A05196 | Acute Toxicity                                                            |
| A05197 | Acute Toxicity, Reproductive Effects                                      |
| A05198 | Acute Toxicity                                                            |
| A05199 | Acute Toxicity, Mutagenicity, Reproductive Effects, Multiple Dose Effects |
| A05200 | Reproductive Effects                                                      |
| A05201 | Acute Toxicity, Reproductive Effects                                      |
| A05202 | Tumorigenicity, Multiple Dose Effects                                     |
| A05203 | Acute Toxicity, Mutagenicity, Reproductive Effects, Multiple Dose Effects |
| A05204 | Reproductive Effects                                                      |
| A05205 | Acute Toxicity                                                            |
| A05206 | Acute Toxicity                                                            |
| A05207 | Reproductive Effects, Multiple Dose Effects                               |
| A05208 | Acute Toxicity, Mutagenicity, Multiple Dose Effects                       |
| A05209 | Skin and Eye Irritation                                                   |
| A05210 | Acute Toxicity, Mutagenicity, Skin and Eye Irritation                     |
| A05211 | Acute Toxicity                                                            |
| A05212 | Acute Toxicity, Skin and Eye Irritation                                   |
| A05213 | Acute Toxicity, Skin and Eye Irritation                                   |

|        |                                                                                                    |
|--------|----------------------------------------------------------------------------------------------------|
| A05214 | Acute Toxicity, Skin and Eye Irritation, Multiple Dose Effects                                     |
| A05215 | Acute Toxicity, Mutagenicity                                                                       |
| A05216 | Acute Toxicity, Mutagenicity, Skin and Eye Irritation, Reproductive Effects, Multiple Dose Effects |
| A05217 | Acute Toxicity, Multiple Dose Effects                                                              |
| A05218 | Acute Toxicity, Skin and Eye Irritation, Multiple Dose Effects                                     |
| A05219 | Acute Toxicity, Mutagenicity                                                                       |
| A05220 | Acute Toxicity, Mutagenicity, Tumorigenicity, Multiple Dose Effects                                |
| A05221 | Tumorigenicity                                                                                     |
| A05222 | Acute Toxicity, Tumorigenicity, Reproductive Effects                                               |
| A05223 | Acute Toxicity, Multiple Dose Effects                                                              |
| A05224 | Acute Toxicity                                                                                     |
| A05225 | Mutagenicity, Reproductive Effects                                                                 |
| A05226 | Acute Toxicity                                                                                     |
| A05227 | Acute Toxicity, Reproductive Effects                                                               |
| A05228 | Acute Toxicity, Mutagenicity, Multiple Dose Effects                                                |
| A05229 | Acute Toxicity, Mutagenicity                                                                       |
| A05230 | Acute Toxicity, Skin and Eye Irritation                                                            |
| A05231 | Mutagenicity, Tumorigenicity                                                                       |
| A05232 | Acute Toxicity                                                                                     |
| A05233 | Skin and Eye Irritation, Reproductive Effects                                                      |
| A05234 | Acute Toxicity, Tumorigenicity, Multiple Dose Effects                                              |
| A05235 | Mutagenicity                                                                                       |
| A05236 | Acute Toxicity, Multiple Dose Effects                                                              |
| A05237 | Mutagenicity                                                                                       |
| A05238 | Acute Toxicity, Multiple Dose Effects                                                              |
| A05239 | Acute Toxicity                                                                                     |
| A05240 | Mutagenicity, Tumorigenicity                                                                       |
| A05241 | Acute Toxicity                                                                                     |
| A05242 | Acute Toxicity                                                                                     |
| A05243 | Acute Toxicity, Mutagenicity, Tumorigenicity                                                       |
| A05244 | Acute Toxicity                                                                                     |
| A05245 | Acute Toxicity, Mutagenicity, Tumorigenicity                                                       |
| A05246 | Acute Toxicity, Skin and Eye Irritation                                                            |
| A05247 | Acute Toxicity, Mutagenicity, Tumorigenicity                                                       |
| A05248 | Acute Toxicity                                                                                     |
| A05249 | Acute Toxicity, Mutagenicity                                                                       |
| A05250 | Acute Toxicity, Mutagenicity                                                                       |
| A05251 | Acute Toxicity                                                                                     |
| A05252 | Acute Toxicity, Skin and Eye Irritation                                                            |
| A05253 | Acute Toxicity, Skin and Eye Irritation                                                            |
| A05254 | Acute Toxicity, Mutagenicity, Reproductive Effects                                                 |
| A05255 | Acute Toxicity, Mutagenicity, Reproductive Effects, Multiple Dose Effects                          |
| A05256 | Acute Toxicity, Mutagenicity, Skin and Eye Irritation                                              |
| A05257 | Acute Toxicity, Mutagenicity, Reproductive Effects                                                 |
| A05258 | Acute Toxicity, Reproductive Effects                                                               |



|        |                                                                              |
|--------|------------------------------------------------------------------------------|
| A05259 | Mutagenicity, Tumorigenicity                                                 |
| A05260 | Acute Toxicity, Multiple Dose Effects                                        |
| A05261 | Skin and Eye Irritation                                                      |
| A05262 | Acute Toxicity, Multiple Dose Effects                                        |
| A05263 | Acute Toxicity, Multiple Dose Effects                                        |
| A05264 | Mutagenicity                                                                 |
| A05265 | Acute Toxicity                                                               |
| A05266 | Acute Toxicity, Mutagenicity                                                 |
| A05267 | Acute Toxicity                                                               |
| A05268 | Mutagenicity                                                                 |
| A05269 | Acute Toxicity                                                               |
| A05270 | Acute Toxicity                                                               |
| A05271 | Acute Toxicity, Mutagenicity, Skin and Eye Irritation, Multiple Dose Effects |
| A05272 | Acute Toxicity                                                               |
| A05273 | Mutagenicity, Skin and Eye Irritation                                        |
| A05274 | Mutagenicity, Tumorigenicity, Skin and Eye Irritation                        |
| A05275 | Acute Toxicity, Reproductive Effects, Multiple Dose Effects                  |
| A05276 | Acute Toxicity, Multiple Dose Effects                                        |
| A05277 | Acute Toxicity, Mutagenicity, Skin and Eye Irritation, Reproductive Effects  |
| A05278 | Mutagenicity, Skin and Eye Irritation, Reproductive Effects, Multiple Dose   |
| A05279 | Acute Toxicity, Skin and Eye Irritation, Reproductive Effects, Multiple Dose |
| A05280 | Acute Toxicity, Skin and Eye Irritation, Multiple Dose Effects               |
| A05281 | Skin and Eye Irritation                                                      |
| A05282 | Acute Toxicity                                                               |
| A05283 | Mutagenicity                                                                 |
| A05284 | Acute Toxicity, Skin and Eye Irritation                                      |
| A05285 | Acute Toxicity, Mutagenicity                                                 |
| A05286 | Mutagenicity                                                                 |
| A05287 | Acute Toxicity                                                               |
| A05288 | Acute Toxicity, Mutagenicity                                                 |
| A05289 | Acute Toxicity, Mutagenicity, Tumorigenicity                                 |
| A05290 | Mutagenicity                                                                 |
| A05291 | Acute Toxicity                                                               |
| A05292 | Acute Toxicity                                                               |
| A05293 | Mutagenicity                                                                 |
| A05294 | Acute Toxicity, Mutagenicity                                                 |
| A05295 | Acute Toxicity                                                               |
| A05296 | Mutagenicity                                                                 |
| A05297 | Acute Toxicity                                                               |
| A05298 | Acute Toxicity                                                               |
| A05299 | Mutagenicity                                                                 |
| A05300 | Mutagenicity, Tumorigenicity, Reproductive Effects                           |
| A05301 | Acute Toxicity                                                               |
| A05302 | Acute Toxicity                                                               |
| A05303 | Acute Toxicity, Multiple Dose Effects                                        |
| A05304 | Acute Toxicity                                                               |

|        |                                                                                                       |
|--------|-------------------------------------------------------------------------------------------------------|
| A05305 | Acute Toxicity, Mutagenicity, Multiple Dose Effects                                                   |
| A05306 | Acute Toxicity                                                                                        |
| A05307 | Acute Toxicity, Mutagenicity, Tumorigenicity                                                          |
| A05308 | Acute Toxicity                                                                                        |
| A05309 | Acute Toxicity, Mutagenicity, Tumorigenicity, Reproductive Effects,                                   |
| A05310 | Acute Toxicity, Mutagenicity, Tumorigenicity, Reproductive Effects                                    |
| A05311 | Tumorigenicity                                                                                        |
| A05312 | Acute Toxicity                                                                                        |
| A05313 | Acute Toxicity                                                                                        |
| A05314 | Acute Toxicity                                                                                        |
| A05315 | Acute Toxicity, Tumorigenicity, Skin and Eye Irritation                                               |
| A05316 | Acute Toxicity                                                                                        |
| A05317 | Acute Toxicity, Skin and Eye Irritation, Reproductive Effects, Multiple Dose                          |
| A05318 | Acute Toxicity, Mutagenicity, Skin and Eye Irritation                                                 |
| A05319 | Acute Toxicity, Skin and Eye Irritation, Reproductive Effects, Multiple Dose                          |
| A05320 | Acute Toxicity, Skin and Eye Irritation                                                               |
| A05321 | Acute Toxicity                                                                                        |
| A05322 | Mutagenicity                                                                                          |
| A05323 | Acute Toxicity                                                                                        |
| A05324 | Mutagenicity, Reproductive Effects                                                                    |
| A05325 | Acute Toxicity                                                                                        |
| A05326 | Acute Toxicity, Mutagenicity                                                                          |
| A05327 | Acute Toxicity                                                                                        |
| A05328 | Acute Toxicity                                                                                        |
| A05329 | Acute Toxicity                                                                                        |
| A05330 | Acute Toxicity, Tumorigenicity, Multiple Dose Effects                                                 |
| A05331 | Acute Toxicity, Mutagenicity, Tumorigenicity, Multiple Dose Effects                                   |
| A05332 | Acute Toxicity, Mutagenicity                                                                          |
| A05333 | Acute Toxicity, Multiple Dose Effects                                                                 |
| A05334 | Acute Toxicity, Skin and Eye Irritation                                                               |
| A05335 | Acute Toxicity                                                                                        |
| A05336 | Acute Toxicity                                                                                        |
| A05337 | Acute Toxicity, Mutagenicity, Skin and Eye Irritation, Reproductive Effects,<br>Multiple Dose Effects |
| A05338 | Acute Toxicity, Reproductive Effects, Multiple Dose Effects                                           |
| A05339 | Acute Toxicity, Skin and Eye Irritation, Multiple Dose Effects                                        |
| A05340 | Mutagenicity, Tumorigenicity                                                                          |
| A05341 | Mutagenicity, Tumorigenicity                                                                          |
| A05342 | Acute Toxicity                                                                                        |
| A05343 | Acute Toxicity, Multiple Dose Effects                                                                 |
| A05344 | Multiple Dose Effects                                                                                 |
| A05345 | Acute Toxicity                                                                                        |
| A05346 | Acute Toxicity                                                                                        |
| A05347 | Acute Toxicity, Mutagenicity                                                                          |
| A05348 | Acute Toxicity, Mutagenicity, Tumorigenicity, Reproductive Effects,                                   |

|        |                                                                                              |
|--------|----------------------------------------------------------------------------------------------|
| A05349 | Acute Toxicity, Mutagenicity, Tumorigenicity, Skin and Eye Irritation, Multiple Dose Effects |
| A05350 | Acute Toxicity                                                                               |
| A05351 | Acute Toxicity, Skin and Eye Irritation, Multiple Dose Effects                               |
| A05352 | Reproductive Effects                                                                         |
| A05353 | Acute Toxicity                                                                               |
| A05354 | Acute Toxicity                                                                               |
| A05355 | Mutagenicity, Tumorigenicity, Skin and Eye Irritation                                        |
| A05356 | Acute Toxicity, Mutagenicity, Tumorigenicity, Skin and Eye Irritation,                       |
| A05357 | Acute Toxicity, Mutagenicity, Tumorigenicity                                                 |
| A05358 | Acute Toxicity, Reproductive Effects, Multiple Dose Effects                                  |
| A05359 | Acute Toxicity                                                                               |
| A05360 | Acute Toxicity                                                                               |
| A05361 | Acute Toxicity, Mutagenicity, Multiple Dose Effects                                          |
| A05362 | Acute Toxicity                                                                               |
| A05363 | Acute Toxicity                                                                               |
| A05364 | Acute Toxicity, Mutagenicity, Skin and Eye Irritation, Multiple Dose Effects                 |
| A05365 | Acute Toxicity                                                                               |
| A05366 | Acute Toxicity, Mutagenicity, Multiple Dose Effects                                          |
| A05367 | Acute Toxicity                                                                               |
| A05368 | Acute Toxicity                                                                               |
| A05369 | Acute Toxicity, Skin and Eye Irritation                                                      |
| A05370 | Acute Toxicity                                                                               |
| A05371 | Acute Toxicity                                                                               |
| A05372 | Mutagenicity                                                                                 |
| A05373 | Acute Toxicity                                                                               |
| A05374 | Acute Toxicity                                                                               |
| A05375 | Acute Toxicity                                                                               |
| A05376 | Acute Toxicity, Mutagenicity, Reproductive Effects, Multiple Dose Effects                    |
| A05377 | Acute Toxicity, Mutagenicity                                                                 |
| A05378 | Mutagenicity                                                                                 |
| A05379 | Mutagenicity, Tumorigenicity                                                                 |
| A05380 | Reproductive Effects                                                                         |
| A05381 | Acute Toxicity, Mutagenicity, Skin and Eye Irritation                                        |
| A05382 | Mutagenicity                                                                                 |
| A05383 | Mutagenicity                                                                                 |
| A05384 | Acute Toxicity                                                                               |
| A05385 | Acute Toxicity                                                                               |
| A05386 | Acute Toxicity                                                                               |
| A05387 | Acute Toxicity                                                                               |
| A05388 | Acute Toxicity                                                                               |
| A05389 | Acute Toxicity                                                                               |
| A05390 | Acute Toxicity, Mutagenicity, Tumorigenicity, Reproductive Effects,                          |
| A05391 | Acute Toxicity                                                                               |
| A05392 | Acute Toxicity                                                                               |
| A05393 | Acute Toxicity, Mutagenicity, Tumorigenicity, Reproductive Effects,                          |

|        |                                                                                                    |
|--------|----------------------------------------------------------------------------------------------------|
| A05394 | Acute Toxicity, Mutagenicity, Reproductive Effects                                                 |
| A05395 | Mutagenicity, Tumorigenicity                                                                       |
| A05396 | Acute Toxicity, Multiple Dose Effects                                                              |
| A05397 | Acute Toxicity                                                                                     |
| A05398 | Mutagenicity                                                                                       |
| A05399 | Acute Toxicity                                                                                     |
| A05400 | Non-toxicity                                                                                       |
| A05401 | Acute Toxicity, Reproductive Effects                                                               |
| A05402 | Acute Toxicity, Mutagenicity, Skin and Eye Irritation, Multiple Dose Effects                       |
| A05403 | Acute Toxicity                                                                                     |
| A05404 | Acute Toxicity                                                                                     |
| A05405 | Acute Toxicity                                                                                     |
| A05406 | Acute Toxicity, Multiple Dose Effects                                                              |
| A05407 | Acute Toxicity, Mutagenicity, Multiple Dose Effects                                                |
| A05408 | Acute Toxicity                                                                                     |
| A05409 | Acute Toxicity                                                                                     |
| A05410 | Acute Toxicity, Skin and Eye Irritation                                                            |
| A05411 | Acute Toxicity                                                                                     |
| A05412 | Acute Toxicity, Mutagenicity                                                                       |
| A05413 | Mutagenicity, Tumorigenicity                                                                       |
| A05414 | Acute Toxicity                                                                                     |
| A05415 | Skin and Eye Irritation                                                                            |
| A05416 | Acute Toxicity, Mutagenicity, Tumorigenicity, Skin and Eye Irritation,                             |
| A05417 | Acute Toxicity                                                                                     |
| A05418 | Acute Toxicity, Mutagenicity, Skin and Eye Irritation, Reproductive Effects, Multiple Dose Effects |
| A05419 | Acute Toxicity                                                                                     |
| A05420 | Acute Toxicity                                                                                     |
| A05421 | Mutagenicity, Reproductive Effects                                                                 |
| A05422 | Mutagenicity                                                                                       |
| A05423 | Acute Toxicity                                                                                     |
| A05424 | Acute Toxicity, Mutagenicity, Tumorigenicity, Reproductive Effects,                                |
| A05425 | Acute Toxicity, Mutagenicity, Multiple Dose Effects                                                |
| A05426 | Acute Toxicity                                                                                     |
| A05427 | Acute Toxicity, Tumorigenicity, Skin and Eye Irritation                                            |
| A05428 | Mutagenicity                                                                                       |
| A05429 | Acute Toxicity                                                                                     |
| A05430 | Acute Toxicity, Mutagenicity, Reproductive Effects                                                 |
| A05431 | Acute Toxicity, Mutagenicity, Multiple Dose Effects                                                |
| A05432 | Acute Toxicity, Mutagenicity, Reproductive Effects                                                 |
| A05433 | Acute Toxicity, Mutagenicity                                                                       |
| A05434 | Acute Toxicity                                                                                     |
| A05435 | Acute Toxicity                                                                                     |
| A05436 | Acute Toxicity                                                                                     |
| A05437 | Acute Toxicity, Mutagenicity, Skin and Eye Irritation                                              |
| A05438 | Mutagenicity, Skin and Eye Irritation                                                              |

|        |                                                                           |
|--------|---------------------------------------------------------------------------|
| A05439 | Acute Toxicity, Mutagenicity, Tumorigenicity, Skin and Eye Irritation,    |
| A05440 | Tumorigenicity                                                            |
| A05441 | Acute Toxicity, Multiple Dose Effects                                     |
| A05442 | Mutagenicity                                                              |
| A05443 | Acute Toxicity, Mutagenicity                                              |
| A05444 | Acute Toxicity                                                            |
| A05445 | Acute Toxicity, Mutagenicity, Tumorigenicity, Skin and Eye Irritation     |
| A05446 | Mutagenicity                                                              |
| A05447 | Acute Toxicity                                                            |
| A05448 | Acute Toxicity                                                            |
| A05449 | Acute Toxicity, Mutagenicity, Tumorigenicity, Reproductive Effects,       |
| A05450 | Acute Toxicity                                                            |
| A05451 | Acute Toxicity, Mutagenicity, Reproductive Effects                        |
| A05452 | Acute Toxicity, Mutagenicity                                              |
| A05453 | Acute Toxicity, Mutagenicity, Reproductive Effects                        |
| A05454 | Acute Toxicity                                                            |
| A05455 | Acute Toxicity                                                            |
| A05456 | Mutagenicity                                                              |
| A05457 | Acute Toxicity                                                            |
| A05458 | Acute Toxicity                                                            |
| A05459 | Acute Toxicity, Skin and Eye Irritation                                   |
| A05460 | Acute Toxicity                                                            |
| A05461 | Acute Toxicity                                                            |
| A05462 | Acute Toxicity, Mutagenicity, Reproductive Effects, Multiple Dose Effects |
| A05463 | Acute Toxicity, Mutagenicity, Tumorigenicity, Multiple Dose Effects       |
| A05464 | Acute Toxicity                                                            |
| A05465 | Acute Toxicity                                                            |
| A05466 | Acute Toxicity                                                            |
| A05467 | Acute Toxicity                                                            |
| A05468 | Acute Toxicity                                                            |
| A05469 | Acute Toxicity                                                            |
| A05470 | Acute Toxicity                                                            |
| A05471 | Acute Toxicity, Mutagenicity, Multiple Dose Effects                       |
| A05472 | Acute Toxicity, Skin and Eye Irritation, Multiple Dose Effects            |
| A05473 | Acute Toxicity                                                            |
| A05474 | Acute Toxicity                                                            |
| A05475 | Acute Toxicity, Skin and Eye Irritation                                   |
| A05476 | Acute Toxicity                                                            |
| A05477 | Acute Toxicity                                                            |
| A05478 | Acute Toxicity                                                            |
| A05479 | Acute Toxicity                                                            |
| A05480 | Acute Toxicity                                                            |
| A05481 | Acute Toxicity, Skin and Eye Irritation                                   |
| A05482 | Acute Toxicity                                                            |
| A05483 | Acute Toxicity, Skin and Eye Irritation                                   |
| A05484 | Acute Toxicity                                                            |

|        |                                                                              |
|--------|------------------------------------------------------------------------------|
| A05485 | Acute Toxicity, Multiple Dose Effects                                        |
| A05486 | Acute Toxicity                                                               |
| A05487 | Acute Toxicity, Mutagenicity, Multiple Dose Effects                          |
| A05488 | Acute Toxicity                                                               |
| A05489 | Acute Toxicity, Mutagenicity, Tumorigenicity, Multiple Dose Effects          |
| A05490 | Acute Toxicity, Mutagenicity, Skin and Eye Irritation                        |
| A05491 | Mutagenicity                                                                 |
| A05492 | Acute Toxicity                                                               |
| A05493 | Acute Toxicity, Multiple Dose Effects                                        |
| A05494 | Acute Toxicity, Mutagenicity, Reproductive Effects, Multiple Dose Effects    |
| A05495 | Acute Toxicity, Skin and Eye Irritation, Multiple Dose Effects               |
| A05496 | Mutagenicity                                                                 |
| A05497 | Acute Toxicity                                                               |
| A05498 | Acute Toxicity, Skin and Eye Irritation                                      |
| A05499 | Acute Toxicity, Reproductive Effects                                         |
| A05500 | Acute Toxicity                                                               |
| A05501 | Acute Toxicity, Mutagenicity, Reproductive Effects, Multiple Dose Effects    |
| A05502 | Acute Toxicity, Mutagenicity, Multiple Dose Effects                          |
| A05503 | Acute Toxicity, Mutagenicity                                                 |
| A05504 | Acute Toxicity, Mutagenicity                                                 |
| A05505 | Acute Toxicity                                                               |
| A05506 | Acute Toxicity, Reproductive Effects, Multiple Dose Effects                  |
| A05507 | Mutagenicity, Skin and Eye Irritation                                        |
| A05508 | Acute Toxicity                                                               |
| A05509 | Mutagenicity                                                                 |
| A05510 | Reproductive Effects                                                         |
| A05511 | Acute Toxicity, Skin and Eye Irritation                                      |
| A05512 | Acute Toxicity                                                               |
| A05513 | Acute Toxicity                                                               |
| A05514 | Tumorigenicity                                                               |
| A05515 | Acute Toxicity, Skin and Eye Irritation, Reproductive Effects, Multiple Dose |
| A05516 | Acute Toxicity, Mutagenicity, Reproductive Effects, Multiple Dose Effects    |
| A05517 | Acute Toxicity, Mutagenicity, Skin and Eye Irritation                        |
| A05518 | Mutagenicity, Tumorigenicity                                                 |
| A05519 | Tumorigenicity                                                               |
| A05520 | Acute Toxicity, Mutagenicity                                                 |
| A05521 | Mutagenicity                                                                 |
| A05522 | Acute Toxicity                                                               |
| A05523 | Mutagenicity, Tumorigenicity                                                 |
| A05524 | Acute Toxicity                                                               |
| A05525 | Acute Toxicity                                                               |
| A05526 | Acute Toxicity                                                               |
| A05527 | Acute Toxicity, Mutagenicity, Tumorigenicity, Multiple Dose Effects          |
| A05528 | Acute Toxicity                                                               |
| A05529 | Mutagenicity                                                                 |
| A05530 | Acute Toxicity, Reproductive Effects                                         |

|        |                                                                                                    |
|--------|----------------------------------------------------------------------------------------------------|
| A05531 | Skin and Eye Irritation, Reproductive Effects                                                      |
| A05532 | Acute Toxicity, Skin and Eye Irritation                                                            |
| A05533 | Acute Toxicity                                                                                     |
| A05534 | Acute Toxicity, Skin and Eye Irritation                                                            |
| A05535 | Acute Toxicity                                                                                     |
| A05536 | Acute Toxicity, Mutagenicity                                                                       |
| A05537 | Acute Toxicity                                                                                     |
| A05538 | Acute Toxicity                                                                                     |
| A05539 | Acute Toxicity, Skin and Eye Irritation, Reproductive Effects, Multiple Dose                       |
| A05540 | Acute Toxicity                                                                                     |
| A05541 | Acute Toxicity, Mutagenicity, Reproductive Effects                                                 |
| A05542 | Acute Toxicity, Skin and Eye Irritation                                                            |
| A05543 | Mutagenicity                                                                                       |
| A05544 | Mutagenicity                                                                                       |
| A05545 | Acute Toxicity                                                                                     |
| A05546 | Acute Toxicity                                                                                     |
| A05547 | Acute Toxicity                                                                                     |
| A05548 | Acute Toxicity, Mutagenicity, Multiple Dose Effects                                                |
| A05549 | Acute Toxicity, Tumorigenicity                                                                     |
| A05550 | Acute Toxicity, Mutagenicity, Tumorigenicity, Multiple Dose Effects                                |
| A05551 | Acute Toxicity                                                                                     |
| A05552 | Acute Toxicity                                                                                     |
| A05553 | Acute Toxicity, Multiple Dose Effects                                                              |
| A05554 | Acute Toxicity, Skin and Eye Irritation, Reproductive Effects, Multiple Dose                       |
| A05555 | Acute Toxicity                                                                                     |
| A05556 | Acute Toxicity, Mutagenicity, Tumorigenicity, Skin and Eye Irritation, Multiple Dose Effects       |
| A05557 | Mutagenicity                                                                                       |
| A05558 | Tumorigenicity                                                                                     |
| A05559 | Mutagenicity                                                                                       |
| A05560 | Acute Toxicity                                                                                     |
| A05561 | Acute Toxicity                                                                                     |
| A05562 | Mutagenicity                                                                                       |
| A05563 | Skin and Eye Irritation, Multiple Dose Effects                                                     |
| A05564 | Acute Toxicity, Reproductive Effects, Multiple Dose Effects                                        |
| A05565 | Acute Toxicity, Mutagenicity                                                                       |
| A05566 | Acute Toxicity, Multiple Dose Effects                                                              |
| A05567 | Acute Toxicity                                                                                     |
| A05568 | Acute Toxicity, Mutagenicity, Skin and Eye Irritation, Reproductive Effects, Multiple Dose Effects |
| A05569 | Acute Toxicity, Mutagenicity, Skin and Eye Irritation                                              |
| A05570 | Acute Toxicity                                                                                     |
| A05571 | Acute Toxicity, Mutagenicity, Skin and Eye Irritation                                              |
| A05572 | Mutagenicity                                                                                       |
| A05573 | Acute Toxicity, Mutagenicity, Reproductive Effects, Multiple Dose Effects                          |
| A05574 | Mutagenicity                                                                                       |

|        |                                                                                              |
|--------|----------------------------------------------------------------------------------------------|
| A05575 | Acute Toxicity, Mutagenicity                                                                 |
| A05576 | Acute Toxicity                                                                               |
| A05577 | Acute Toxicity, Mutagenicity, Tumorigenicity, Skin and Eye Irritation                        |
| A05578 | Mutagenicity                                                                                 |
| A05579 | Acute Toxicity, Multiple Dose Effects                                                        |
| A05580 | Acute Toxicity                                                                               |
| A05581 | Acute Toxicity                                                                               |
| A05582 | Acute Toxicity, Mutagenicity, Tumorigenicity, Skin and Eye Irritation                        |
| A05583 | Acute Toxicity                                                                               |
| A05584 | Acute Toxicity, Mutagenicity, Skin and Eye Irritation                                        |
| A05585 | Acute Toxicity, Tumorigenicity, Reproductive Effects, Multiple Dose Effects                  |
| A05586 | Acute Toxicity, Mutagenicity, Skin and Eye Irritation, Multiple Dose Effects                 |
| A05587 | Mutagenicity                                                                                 |
| A05588 | Acute Toxicity                                                                               |
| A05589 | Acute Toxicity, Skin and Eye Irritation                                                      |
| A05590 | Acute Toxicity, Mutagenicity                                                                 |
| A05591 | Acute Toxicity, Mutagenicity, Tumorigenicity, Skin and Eye Irritation, Multiple Dose Effects |
| A05592 | Acute Toxicity                                                                               |
| A05593 | Mutagenicity                                                                                 |
| A05594 | Mutagenicity                                                                                 |
| A05595 | Mutagenicity                                                                                 |
| A05596 | Mutagenicity, Tumorigenicity                                                                 |
| A05597 | Acute Toxicity, Mutagenicity, Tumorigenicity, Skin and Eye Irritation, Multiple Dose Effects |
| A05598 | Acute Toxicity, Mutagenicity, Skin and Eye Irritation                                        |
| A05599 | Acute Toxicity, Skin and Eye Irritation                                                      |
| A05600 | Acute Toxicity, Mutagenicity                                                                 |
| A05601 | Acute Toxicity, Mutagenicity, Tumorigenicity, Multiple Dose Effects                          |
| A05602 | Acute Toxicity                                                                               |
| A05603 | Acute Toxicity                                                                               |
| A05604 | Acute Toxicity                                                                               |
| A05605 | Acute Toxicity, Reproductive Effects, Multiple Dose Effects                                  |
| A05606 | Acute Toxicity                                                                               |
| A05607 | Acute Toxicity                                                                               |
| A05608 | Acute Toxicity, Tumorigenicity                                                               |
| A05609 | Acute Toxicity, Mutagenicity                                                                 |
| A05610 | Acute Toxicity                                                                               |
| A05611 | Mutagenicity                                                                                 |
| A05612 | Mutagenicity                                                                                 |
| A05613 | Skin and Eye Irritation                                                                      |
| A05614 | Acute Toxicity                                                                               |
| A05615 | Acute Toxicity                                                                               |
| A05616 | Acute Toxicity                                                                               |
| A05617 | Acute Toxicity, Reproductive Effects                                                         |
| A05618 | Acute Toxicity                                                                               |



|        |                                                                                              |
|--------|----------------------------------------------------------------------------------------------|
| A05619 | Acute Toxicity, Mutagenicity, Multiple Dose Effects                                          |
| A05620 | Acute Toxicity                                                                               |
| A05621 | Acute Toxicity, Mutagenicity, Tumorigenicity, Skin and Eye Irritation, Multiple Dose Effects |
| A05622 | Acute Toxicity                                                                               |
| A05623 | Acute Toxicity                                                                               |
| A05624 | Acute Toxicity, Mutagenicity                                                                 |
| A05625 | Mutagenicity                                                                                 |
| A05626 | Acute Toxicity                                                                               |
| A05627 | Acute Toxicity, Multiple Dose Effects                                                        |
| A05628 | Acute Toxicity                                                                               |
| A05629 | Acute Toxicity                                                                               |
| A05630 | Mutagenicity, Skin and Eye Irritation                                                        |
| A05631 | Non-toxicity                                                                                 |
| A05632 | Mutagenicity                                                                                 |
| A05633 | Acute Toxicity                                                                               |
| A05634 | Acute Toxicity, Multiple Dose Effects                                                        |
| A05635 | Acute Toxicity                                                                               |
| A05636 | Mutagenicity                                                                                 |
| A05637 | Acute Toxicity                                                                               |
| A05638 | Skin and Eye Irritation, Multiple Dose Effects                                               |
| A05639 | Acute Toxicity                                                                               |
| A05640 | Acute Toxicity                                                                               |
| A05641 | Mutagenicity, Tumorigenicity                                                                 |
| A05642 | Mutagenicity, Tumorigenicity                                                                 |
| A05643 | Mutagenicity, Tumorigenicity                                                                 |
| A05644 | Mutagenicity, Tumorigenicity                                                                 |
| A05645 | Acute Toxicity                                                                               |
| A05646 | Non-toxicity                                                                                 |
| A05647 | Acute Toxicity, Mutagenicity                                                                 |
| A05648 | Acute Toxicity, Mutagenicity                                                                 |
| A05649 | Acute Toxicity, Multiple Dose Effects                                                        |
| A05650 | Acute Toxicity                                                                               |
| A05651 | Mutagenicity                                                                                 |
| A05652 | Tumorigenicity                                                                               |
| A05653 | Acute Toxicity, Mutagenicity, Tumorigenicity, Skin and Eye Irritation, Multiple Dose Effects |
| A05654 | Acute Toxicity                                                                               |
| A05655 | Acute Toxicity, Mutagenicity, Tumorigenicity                                                 |
| A05656 | Acute Toxicity                                                                               |
| A05657 | Mutagenicity, Tumorigenicity                                                                 |
| A05658 | Acute Toxicity                                                                               |
| A05659 | Acute Toxicity, Mutagenicity, Tumorigenicity, Skin and Eye Irritation,                       |
| A05660 | Acute Toxicity, Mutagenicity                                                                 |
| A05661 | Acute Toxicity                                                                               |
| A05662 | Acute Toxicity                                                                               |

|        |                                                                                                    |
|--------|----------------------------------------------------------------------------------------------------|
| A05663 | Acute Toxicity                                                                                     |
| A05664 | Acute Toxicity                                                                                     |
| A05665 | Acute Toxicity, Mutagenicity, Tumorigenicity, Skin and Eye Irritation, Multiple Dose Effects       |
| A05666 | Acute Toxicity, Mutagenicity, Tumorigenicity, Skin and Eye Irritation                              |
| A05667 | Acute Toxicity, Mutagenicity, Skin and Eye Irritation, Reproductive Effects                        |
| A05668 | Acute Toxicity, Skin and Eye Irritation, Reproductive Effects                                      |
| A05669 | Acute Toxicity, Tumorigenicity, Multiple Dose Effects                                              |
| A05670 | Acute Toxicity, Mutagenicity, Multiple Dose Effects                                                |
| A05671 | Acute Toxicity                                                                                     |
| A05672 | Acute Toxicity                                                                                     |
| A05673 | Acute Toxicity, Mutagenicity, Tumorigenicity, Multiple Dose Effects                                |
| A05674 | Non-toxicity                                                                                       |
| A05675 | Mutagenicity                                                                                       |
| A05676 | Acute Toxicity                                                                                     |
| A05677 | Acute Toxicity, Mutagenicity                                                                       |
| A05678 | Multiple Dose Effects                                                                              |
| A05679 | Acute Toxicity, Mutagenicity, Skin and Eye Irritation, Multiple Dose Effects                       |
| A05680 | Mutagenicity, Tumorigenicity                                                                       |
| A05681 | Acute Toxicity, Mutagenicity, Tumorigenicity                                                       |
| A05682 | Acute Toxicity, Mutagenicity, Multiple Dose Effects                                                |
| A05683 | Acute Toxicity, Mutagenicity                                                                       |
| A05684 | Acute Toxicity, Multiple Dose Effects                                                              |
| A05685 | Acute Toxicity, Skin and Eye Irritation, Multiple Dose Effects                                     |
| A05686 | Mutagenicity                                                                                       |
| A05687 | Acute Toxicity                                                                                     |
| A05688 | Acute Toxicity, Mutagenicity                                                                       |
| A05689 | Acute Toxicity, Skin and Eye Irritation                                                            |
| A05690 | Acute Toxicity, Multiple Dose Effects                                                              |
| A05691 | Acute Toxicity, Mutagenicity, Skin and Eye Irritation, Reproductive Effects, Multiple Dose Effects |
| A05692 | Acute Toxicity                                                                                     |
| A05693 | Skin and Eye Irritation                                                                            |
| A05694 | Acute Toxicity, Mutagenicity                                                                       |
| A05695 | Acute Toxicity, Mutagenicity                                                                       |
| A05696 | Mutagenicity                                                                                       |
| A05697 | Mutagenicity                                                                                       |
| A05698 | Acute Toxicity, Mutagenicity, Skin and Eye Irritation                                              |
| A05699 | Acute Toxicity                                                                                     |
| A05700 | Acute Toxicity                                                                                     |
| A05701 | Acute Toxicity, Mutagenicity, Tumorigenicity                                                       |
| A05702 | Acute Toxicity                                                                                     |
| A05703 | Acute Toxicity, Mutagenicity                                                                       |
| A05704 | Acute Toxicity, Mutagenicity, Tumorigenicity, Skin and Eye Irritation, Multiple Dose Effects       |
| A05705 | Acute Toxicity, Mutagenicity, Skin and Eye Irritation, Multiple Dose Effects                       |

|        |                                                                           |
|--------|---------------------------------------------------------------------------|
| A05706 | Acute Toxicity, Mutagenicity                                              |
| A05707 | Acute Toxicity, Mutagenicity, Multiple Dose Effects                       |
| A05708 | Acute Toxicity, Multiple Dose Effects                                     |
| A05709 | Acute Toxicity                                                            |
| A05710 | Mutagenicity                                                              |
| A05711 | Mutagenicity                                                              |
| A05712 | Acute Toxicity                                                            |
| A05713 | Acute Toxicity                                                            |
| A05714 | Acute Toxicity                                                            |
| A05715 | Acute Toxicity                                                            |
| A05716 | Mutagenicity                                                              |
| A05717 | Mutagenicity, Tumorigenicity                                              |
| A05718 | Mutagenicity, Tumorigenicity                                              |
| A05719 | Acute Toxicity, Mutagenicity                                              |
| A05720 | Mutagenicity, Tumorigenicity                                              |
| A05721 | Mutagenicity, Tumorigenicity                                              |
| A05722 | Mutagenicity, Tumorigenicity                                              |
| A05723 | Mutagenicity                                                              |
| A05724 | Acute Toxicity                                                            |
| A05725 | Mutagenicity                                                              |
| A05726 | Mutagenicity                                                              |
| A05727 | Acute Toxicity, Mutagenicity, Multiple Dose Effects                       |
| A05728 | Acute Toxicity, Mutagenicity, Multiple Dose Effects                       |
| A05729 | Acute Toxicity                                                            |
| A05730 | Acute Toxicity, Mutagenicity, Reproductive Effects, Multiple Dose Effects |
| A05731 | Mutagenicity                                                              |
| A05732 | Acute Toxicity                                                            |
| A05733 | Acute Toxicity                                                            |
| A05734 | Acute Toxicity                                                            |
| A05735 | Acute Toxicity                                                            |
| A05736 | Acute Toxicity, Mutagenicity, Multiple Dose Effects                       |
| A05737 | Mutagenicity                                                              |
| A05738 | Acute Toxicity, Mutagenicity, Multiple Dose Effects                       |
| A05739 | Mutagenicity, Tumorigenicity                                              |
| A05740 | Acute Toxicity, Mutagenicity                                              |
| A05741 | Acute Toxicity, Skin and Eye Irritation                                   |
| A05742 | Acute Toxicity                                                            |
| A05743 | Acute Toxicity                                                            |
| A05744 | Mutagenicity, Tumorigenicity                                              |
| A05745 | Acute Toxicity                                                            |
| A05746 | Mutagenicity                                                              |
| A05747 | Acute Toxicity, Multiple Dose Effects                                     |
| A05748 | Acute Toxicity                                                            |
| A05749 | Skin and Eye Irritation                                                   |
| A05750 | Acute Toxicity                                                            |
| A05751 | Acute Toxicity, Mutagenicity, Multiple Dose Effects                       |

|        |                                                                              |
|--------|------------------------------------------------------------------------------|
| A05752 | Acute Toxicity, Mutagenicity                                                 |
| A05753 | Acute Toxicity                                                               |
| A05754 | Acute Toxicity                                                               |
| A05755 | Acute Toxicity                                                               |
| A05756 | Acute Toxicity, Skin and Eye Irritation, Reproductive Effects                |
| A05757 | Acute Toxicity, Mutagenicity, Multiple Dose Effects                          |
| A05758 | Acute Toxicity, Mutagenicity                                                 |
| A05759 | Acute Toxicity, Mutagenicity, Multiple Dose Effects                          |
| A05760 | Acute Toxicity, Skin and Eye Irritation                                      |
| A05761 | Acute Toxicity                                                               |
| A05762 | Acute Toxicity                                                               |
| A05763 | Acute Toxicity                                                               |
| A05764 | Acute Toxicity                                                               |
| A05765 | Acute Toxicity, Mutagenicity                                                 |
| A05766 | Acute Toxicity                                                               |
| A05767 | Acute Toxicity                                                               |
| A05768 | Acute Toxicity, Mutagenicity                                                 |
| A05769 | Acute Toxicity, Mutagenicity, Skin and Eye Irritation                        |
| A05770 | Acute Toxicity                                                               |
| A05771 | Acute Toxicity                                                               |
| A05772 | Acute Toxicity, Multiple Dose Effects                                        |
| A05773 | Acute Toxicity, Skin and Eye Irritation                                      |
| A05774 | Acute Toxicity                                                               |
| A05775 | Acute Toxicity                                                               |
| A05776 | Mutagenicity                                                                 |
| A05777 | Acute Toxicity, Mutagenicity, Tumorigenicity, Multiple Dose Effects          |
| A05778 | Acute Toxicity                                                               |
| A05779 | Acute Toxicity, Mutagenicity, Multiple Dose Effects                          |
| A05780 | Mutagenicity                                                                 |
| A05781 | Acute Toxicity                                                               |
| A05782 | Acute Toxicity, Mutagenicity                                                 |
| A05783 | Acute Toxicity                                                               |
| A05784 | Acute Toxicity                                                               |
| A05785 | Acute Toxicity, Multiple Dose Effects                                        |
| A05786 | Mutagenicity                                                                 |
| A05787 | Acute Toxicity                                                               |
| A05788 | Acute Toxicity                                                               |
| A05789 | Acute Toxicity, Mutagenicity                                                 |
| A05790 | Acute Toxicity                                                               |
| A05791 | Acute Toxicity, Skin and Eye Irritation, Multiple Dose Effects               |
| A05792 | Acute Toxicity                                                               |
| A05793 | Acute Toxicity, Mutagenicity                                                 |
| A05794 | Acute Toxicity, Skin and Eye Irritation, Reproductive Effects, Multiple Dose |
| A05795 | Acute Toxicity, Skin and Eye Irritation, Multiple Dose Effects               |
| A05796 | Acute Toxicity, Mutagenicity, Tumorigenicity, Skin and Eye Irritation,       |
| A05797 | Acute Toxicity, Reproductive Effects, Multiple Dose Effects                  |

|        |                                                                              |
|--------|------------------------------------------------------------------------------|
| A05798 | Acute Toxicity                                                               |
| A05799 | Acute Toxicity, Skin and Eye Irritation                                      |
| A05800 | Acute Toxicity, Reproductive Effects                                         |
| A05801 | Acute Toxicity, Mutagenicity                                                 |
| A05802 | Acute Toxicity, Skin and Eye Irritation                                      |
| A05803 | Acute Toxicity, Skin and Eye Irritation, Multiple Dose Effects               |
| A05804 | Acute Toxicity, Skin and Eye Irritation                                      |
| A05805 | Acute Toxicity                                                               |
| A05806 | Acute Toxicity                                                               |
| A05807 | Acute Toxicity                                                               |
| A05808 | Acute Toxicity, Skin and Eye Irritation, Multiple Dose Effects               |
| A05809 | Acute Toxicity                                                               |
| A05810 | Acute Toxicity, Mutagenicity, Tumorigenicity, Reproductive Effects           |
| A05811 | Acute Toxicity, Skin and Eye Irritation, Multiple Dose Effects               |
| A05812 | Acute Toxicity, Mutagenicity, Reproductive Effects                           |
| A05813 | Mutagenicity, Tumorigenicity                                                 |
| A05814 | Acute Toxicity, Mutagenicity, Tumorigenicity, Multiple Dose Effects          |
| A05815 | Acute Toxicity, Skin and Eye Irritation                                      |
| A05816 | Acute Toxicity, Multiple Dose Effects                                        |
| A05817 | Acute Toxicity, Skin and Eye Irritation, Reproductive Effects, Multiple Dose |
| A05818 | Acute Toxicity                                                               |
| A05819 | Acute Toxicity                                                               |
| A05820 | Acute Toxicity, Mutagenicity, Skin and Eye Irritation                        |
| A05821 | Acute Toxicity                                                               |
| A05822 | Acute Toxicity, Mutagenicity                                                 |
| A05823 | Acute Toxicity                                                               |
| A05824 | Acute Toxicity                                                               |
| A05825 | Acute Toxicity, Mutagenicity, Skin and Eye Irritation, Multiple Dose Effects |
| A05826 | Acute Toxicity, Mutagenicity                                                 |
| A05827 | Mutagenicity, Tumorigenicity, Multiple Dose Effects                          |
| A05828 | Mutagenicity, Skin and Eye Irritation, Multiple Dose Effects                 |
| A05829 | Mutagenicity, Tumorigenicity                                                 |
| A05830 | Acute Toxicity                                                               |
| A05831 | Acute Toxicity                                                               |
| A05832 | Acute Toxicity, Mutagenicity, Skin and Eye Irritation, Multiple Dose Effects |
| A05833 | Acute Toxicity                                                               |
| A05834 | Acute Toxicity, Mutagenicity, Skin and Eye Irritation                        |
| A05835 | Acute Toxicity, Mutagenicity                                                 |
| A05836 | Acute Toxicity                                                               |
| A05837 | Acute Toxicity                                                               |
| A05838 | Mutagenicity, Tumorigenicity                                                 |
| A05839 | Acute Toxicity                                                               |
| A05840 | Acute Toxicity                                                               |
| A05841 | Acute Toxicity                                                               |
| A05842 | Acute Toxicity                                                               |
| A05843 | Acute Toxicity                                                               |

|        |                                                                                                    |
|--------|----------------------------------------------------------------------------------------------------|
| A05844 | Acute Toxicity                                                                                     |
| A05845 | Acute Toxicity                                                                                     |
| A05846 | Acute Toxicity                                                                                     |
| A05847 | Acute Toxicity, Multiple Dose Effects                                                              |
| A05848 | Acute Toxicity                                                                                     |
| A05849 | Acute Toxicity, Multiple Dose Effects                                                              |
| A05850 | Acute Toxicity                                                                                     |
| A05851 | Acute Toxicity, Multiple Dose Effects                                                              |
| A05852 | Acute Toxicity                                                                                     |
| A05853 | Mutagenicity                                                                                       |
| A05854 | Acute Toxicity, Tumorigenicity                                                                     |
| A05855 | Acute Toxicity                                                                                     |
| A05856 | Acute Toxicity                                                                                     |
| A05857 | Acute Toxicity                                                                                     |
| A05858 | Acute Toxicity                                                                                     |
| A05859 | Acute Toxicity, Tumorigenicity                                                                     |
| A05860 | Mutagenicity                                                                                       |
| A05861 | Mutagenicity, Tumorigenicity                                                                       |
| A05862 | Reproductive Effects                                                                               |
| A05863 | Acute Toxicity                                                                                     |
| A05864 | Acute Toxicity                                                                                     |
| A05865 | Acute Toxicity, Tumorigenicity                                                                     |
| A05866 | Acute Toxicity, Mutagenicity, Reproductive Effects, Multiple Dose Effects                          |
| A05867 | Acute Toxicity, Reproductive Effects                                                               |
| A05868 | Acute Toxicity                                                                                     |
| A05869 | Mutagenicity                                                                                       |
| A05870 | Acute Toxicity, Mutagenicity, Skin and Eye Irritation, Reproductive Effects, Multiple Dose Effects |
| A05871 | Acute Toxicity, Mutagenicity, Skin and Eye Irritation                                              |
| A05872 | Mutagenicity                                                                                       |
| A05873 | Mutagenicity                                                                                       |
| A05874 | Mutagenicity                                                                                       |
| A05875 | Acute Toxicity                                                                                     |
| A05876 | Acute Toxicity                                                                                     |
| A05877 | Acute Toxicity                                                                                     |
| A05878 | Acute Toxicity                                                                                     |
| A05879 | Mutagenicity                                                                                       |
| A05880 | Acute Toxicity, Mutagenicity, Reproductive Effects, Multiple Dose Effects                          |
| A05881 | Acute Toxicity, Mutagenicity, Skin and Eye Irritation                                              |
| A05882 | Reproductive Effects                                                                               |
| A05883 | Acute Toxicity, Mutagenicity, Skin and Eye Irritation, Multiple Dose Effects                       |
| A05884 | Acute Toxicity                                                                                     |
| A05885 | Mutagenicity, Tumorigenicity                                                                       |
| A05886 | Mutagenicity, Tumorigenicity                                                                       |
| A05887 | Mutagenicity, Tumorigenicity                                                                       |
| A05888 | Acute Toxicity                                                                                     |

|        |                                                                           |
|--------|---------------------------------------------------------------------------|
| A05889 | Acute Toxicity, Mutagenicity, Tumorigenicity, Skin and Eye Irritation     |
| A05890 | Mutagenicity                                                              |
| A05891 | Acute Toxicity, Mutagenicity, Reproductive Effects                        |
| A05892 | Mutagenicity, Reproductive Effects                                        |
| A05893 | Acute Toxicity, Reproductive Effects                                      |
| A05894 | Acute Toxicity, Mutagenicity, Reproductive Effects, Multiple Dose Effects |
| A05895 | Acute Toxicity                                                            |
| A05896 | Tumorigenicity                                                            |
| A05897 | Mutagenicity                                                              |
| A05898 | Mutagenicity                                                              |
| A05899 | Acute Toxicity, Mutagenicity                                              |
| A05900 | Mutagenicity                                                              |
| A05901 | Acute Toxicity                                                            |
| A05902 | Acute Toxicity, Mutagenicity                                              |
| A05903 | Acute Toxicity                                                            |
| A05904 | Acute Toxicity                                                            |
| A05905 | Acute Toxicity                                                            |
| A05906 | Acute Toxicity, Skin and Eye Irritation, Reproductive Effects             |
| A05907 | Acute Toxicity, Multiple Dose Effects                                     |
| A05908 | Acute Toxicity                                                            |
| A05909 | Acute Toxicity                                                            |
| A05910 | Acute Toxicity, Reproductive Effects                                      |
| A05911 | Acute Toxicity, Mutagenicity                                              |
| A05912 | Acute Toxicity                                                            |
| A05913 | Acute Toxicity                                                            |
| A05914 | Acute Toxicity                                                            |
| A05915 | Acute Toxicity                                                            |
| A05916 | Acute Toxicity                                                            |
| A05917 | Acute Toxicity                                                            |
| A05918 | Acute Toxicity, Mutagenicity                                              |
| A05919 | Acute Toxicity, Mutagenicity                                              |
| A05920 | Multiple Dose Effects                                                     |
| A05921 | Mutagenicity                                                              |
| A05922 | Acute Toxicity, Mutagenicity                                              |
| A05923 | Acute Toxicity, Tumorigenicity                                            |
| A05924 | Skin and Eye Irritation                                                   |
| A05925 | Mutagenicity                                                              |
| A05926 | Acute Toxicity, Mutagenicity, Reproductive Effects, Multiple Dose Effects |
| A05927 | Acute Toxicity                                                            |
| A05928 | Acute Toxicity, Mutagenicity                                              |
| A05929 | Tumorigenicity                                                            |
| A05930 | Acute Toxicity                                                            |
| A05931 | Mutagenicity                                                              |
| A05932 | Mutagenicity                                                              |
| A05933 | Acute Toxicity                                                            |
| A05934 | Acute Toxicity                                                            |

|        |                                                                              |
|--------|------------------------------------------------------------------------------|
| A05935 | Mutagenicity                                                                 |
| A05936 | Acute Toxicity, Skin and Eye Irritation                                      |
| A05937 | Acute Toxicity, Mutagenicity                                                 |
| A05938 | Acute Toxicity                                                               |
| A05939 | Acute Toxicity                                                               |
| A05940 | Acute Toxicity, Mutagenicity, Tumorigenicity, Reproductive Effects,          |
| A05941 | Acute Toxicity                                                               |
| A05942 | Acute Toxicity                                                               |
| A05943 | Mutagenicity                                                                 |
| A05944 | Acute Toxicity, Mutagenicity, Skin and Eye Irritation, Multiple Dose Effects |
| A05945 | Acute Toxicity, Mutagenicity, Tumorigenicity, Skin and Eye Irritation,       |
| A05946 | Acute Toxicity                                                               |
| A05947 | Acute Toxicity                                                               |
| A05948 | Acute Toxicity                                                               |
| A05949 | Acute Toxicity, Mutagenicity, Skin and Eye Irritation, Reproductive Effects  |
| A05950 | Acute Toxicity                                                               |
| A05951 | Acute Toxicity, Mutagenicity, Tumorigenicity, Skin and Eye Irritation,       |
| A05952 | Mutagenicity, Tumorigenicity                                                 |
| A05953 | Multiple Dose Effects                                                        |
| A05954 | Mutagenicity                                                                 |
| A05955 | Acute Toxicity                                                               |
| A05956 | Acute Toxicity, Mutagenicity, Skin and Eye Irritation, Multiple Dose Effects |
| A05957 | Acute Toxicity, Mutagenicity                                                 |
| A05958 | Acute Toxicity, Multiple Dose Effects                                        |
| A05959 | Acute Toxicity                                                               |
| A05960 | Acute Toxicity                                                               |
| A05961 | Acute Toxicity                                                               |
| A05962 | Acute Toxicity, Mutagenicity, Reproductive Effects, Multiple Dose Effects    |
| A05963 | Acute Toxicity                                                               |
| A05964 | Acute Toxicity                                                               |
| A05965 | Acute Toxicity                                                               |
| A05966 | Acute Toxicity, Reproductive Effects, Multiple Dose Effects                  |
| A05967 | Acute Toxicity, Mutagenicity                                                 |
| A05968 | Mutagenicity, Tumorigenicity                                                 |
| A05969 | Mutagenicity, Tumorigenicity                                                 |
| A05970 | Tumorigenicity                                                               |
| A05971 | Mutagenicity                                                                 |
| A05972 | Acute Toxicity, Mutagenicity                                                 |
| A05973 | Acute Toxicity                                                               |
| A05974 | Acute Toxicity, Mutagenicity                                                 |
| A05975 | Mutagenicity, Tumorigenicity                                                 |
| A05976 | Mutagenicity, Tumorigenicity                                                 |
| A05977 | Mutagenicity, Tumorigenicity                                                 |
| A05978 | Mutagenicity, Tumorigenicity                                                 |
| A05979 | Acute Toxicity, Mutagenicity                                                 |
| A05980 | Acute Toxicity                                                               |



|        |                                                                           |
|--------|---------------------------------------------------------------------------|
| A05981 | Reproductive Effects                                                      |
| A05982 | Acute Toxicity                                                            |
| A05983 | Acute Toxicity, Mutagenicity                                              |
| A05984 | Acute Toxicity                                                            |
| A05985 | Acute Toxicity, Mutagenicity                                              |
| A05986 | Acute Toxicity, Mutagenicity, Multiple Dose Effects                       |
| A05987 | Acute Toxicity, Mutagenicity, Tumorigenicity                              |
| A05988 | Acute Toxicity, Multiple Dose Effects                                     |
| A05989 | Acute Toxicity                                                            |
| A05990 | Acute Toxicity, Mutagenicity, Reproductive Effects                        |
| A05991 | Acute Toxicity                                                            |
| A05992 | Acute Toxicity, Mutagenicity                                              |
| A05993 | Acute Toxicity                                                            |
| A05994 | Acute Toxicity                                                            |
| A05995 | Acute Toxicity                                                            |
| A05996 | Acute Toxicity, Tumorigenicity                                            |
| A05997 | Mutagenicity                                                              |
| A05998 | Acute Toxicity, Mutagenicity                                              |
| A05999 | Acute Toxicity                                                            |
| A06000 | Acute Toxicity, Multiple Dose Effects                                     |
| A06001 | Acute Toxicity, Multiple Dose Effects                                     |
| A06002 | Mutagenicity                                                              |
| A06003 | Multiple Dose Effects                                                     |
| A06004 | Acute Toxicity, Mutagenicity, Tumorigenicity, Skin and Eye Irritation,    |
| A06005 | Acute Toxicity                                                            |
| A06006 | Mutagenicity                                                              |
| A06007 | Acute Toxicity, Reproductive Effects                                      |
| A06008 | Mutagenicity                                                              |
| A06009 | Acute Toxicity, Mutagenicity                                              |
| A06010 | Acute Toxicity                                                            |
| A06011 | Acute Toxicity, Multiple Dose Effects                                     |
| A06012 | Acute Toxicity                                                            |
| A06013 | Acute Toxicity                                                            |
| A06014 | Acute Toxicity                                                            |
| A06015 | Acute Toxicity, Multiple Dose Effects                                     |
| A06016 | Acute Toxicity, Mutagenicity                                              |
| A06017 | Acute Toxicity                                                            |
| A06018 | Acute Toxicity                                                            |
| A06019 | Acute Toxicity                                                            |
| A06020 | Acute Toxicity                                                            |
| A06021 | Acute Toxicity, Mutagenicity, Reproductive Effects, Multiple Dose Effects |
| A06022 | Acute Toxicity, Mutagenicity                                              |
| A06023 | Acute Toxicity                                                            |
| A06024 | Acute Toxicity                                                            |
| A06025 | Acute Toxicity                                                            |
| A06026 | Acute Toxicity                                                            |

|        |                                                                                                    |
|--------|----------------------------------------------------------------------------------------------------|
| A06027 | Acute Toxicity, Multiple Dose Effects                                                              |
| A06028 | Acute Toxicity                                                                                     |
| A06029 | Acute Toxicity, Reproductive Effects                                                               |
| A06030 | Acute Toxicity                                                                                     |
| A06031 | Acute Toxicity, Mutagenicity, Skin and Eye Irritation                                              |
| A06032 | Acute Toxicity                                                                                     |
| A06033 | Acute Toxicity, Mutagenicity                                                                       |
| A06034 | Non-toxicity                                                                                       |
| A06035 | Mutagenicity                                                                                       |
| A06036 | Mutagenicity, Reproductive Effects                                                                 |
| A06037 | Acute Toxicity, Mutagenicity, Skin and Eye Irritation, Multiple Dose Effects                       |
| A06038 | Acute Toxicity, Mutagenicity                                                                       |
| A06039 | Mutagenicity, Tumorigenicity, Multiple Dose Effects                                                |
| A06040 | Acute Toxicity, Multiple Dose Effects                                                              |
| A06041 | Acute Toxicity                                                                                     |
| A06042 | Acute Toxicity                                                                                     |
| A06043 | Skin and Eye Irritation                                                                            |
| A06044 | Mutagenicity                                                                                       |
| A06045 | Acute Toxicity                                                                                     |
| A06046 | Acute Toxicity, Skin and Eye Irritation, Multiple Dose Effects                                     |
| A06047 | Acute Toxicity                                                                                     |
| A06048 | Acute Toxicity                                                                                     |
| A06049 | Acute Toxicity                                                                                     |
| A06050 | Acute Toxicity, Skin and Eye Irritation                                                            |
| A06051 | Acute Toxicity                                                                                     |
| A06052 | Acute Toxicity, Mutagenicity, Skin and Eye Irritation, Reproductive Effects, Multiple Dose Effects |
| A06053 | Mutagenicity, Tumorigenicity, Reproductive Effects, Multiple Dose Effects                          |
| A06054 | Acute Toxicity, Mutagenicity, Tumorigenicity                                                       |
| A06055 | Non-toxicity                                                                                       |
| A06056 | Acute Toxicity                                                                                     |
| A06057 | Mutagenicity, Tumorigenicity                                                                       |
| A06058 | Acute Toxicity, Mutagenicity, Skin and Eye Irritation                                              |
| A06059 | Acute Toxicity, Reproductive Effects, Multiple Dose Effects                                        |
| A06060 | Acute Toxicity, Mutagenicity                                                                       |
| A06061 | Acute Toxicity, Mutagenicity, Tumorigenicity, Reproductive Effects,                                |
| A06062 | Acute Toxicity                                                                                     |
| A06063 | Acute Toxicity, Mutagenicity, Multiple Dose Effects                                                |
| A06064 | Acute Toxicity, Skin and Eye Irritation                                                            |
| A06065 | Acute Toxicity                                                                                     |
| A06066 | Acute Toxicity                                                                                     |
| A06067 | Acute Toxicity, Multiple Dose Effects                                                              |
| A06068 | Mutagenicity, Tumorigenicity                                                                       |
| A06069 | Mutagenicity, Tumorigenicity                                                                       |
| A06070 | Tumorigenicity                                                                                     |
| A06071 | Mutagenicity, Tumorigenicity                                                                       |

|        |                                                                                                    |
|--------|----------------------------------------------------------------------------------------------------|
| A06072 | Acute Toxicity                                                                                     |
| A06073 | Acute Toxicity                                                                                     |
| A06074 | Acute Toxicity, Mutagenicity, Skin and Eye Irritation, Reproductive Effects, Multiple Dose Effects |
| A06075 | Acute Toxicity                                                                                     |
| A06076 | Acute Toxicity                                                                                     |
| A06077 | Acute Toxicity                                                                                     |
| A06078 | Acute Toxicity                                                                                     |
| A06079 | Mutagenicity                                                                                       |
| A06080 | Acute Toxicity                                                                                     |
| A06081 | Acute Toxicity                                                                                     |
| A06082 | Acute Toxicity                                                                                     |
| A06083 | Acute Toxicity                                                                                     |
| A06084 | Acute Toxicity                                                                                     |
| A06085 | Acute Toxicity, Multiple Dose Effects                                                              |
| A06086 | Acute Toxicity                                                                                     |
| A06087 | Acute Toxicity, Skin and Eye Irritation                                                            |
| A06088 | Acute Toxicity                                                                                     |
| A06089 | Acute Toxicity                                                                                     |
| A06090 | Acute Toxicity, Mutagenicity, Reproductive Effects                                                 |
| A06091 | Acute Toxicity, Mutagenicity                                                                       |
| A06092 | Acute Toxicity, Mutagenicity, Tumorigenicity, Multiple Dose Effects                                |
| A06093 | Reproductive Effects                                                                               |
| A06094 | Acute Toxicity                                                                                     |
| A06095 | Acute Toxicity, Mutagenicity                                                                       |
| A06096 | Tumorigenicity                                                                                     |
| A06097 | Acute Toxicity                                                                                     |
| A06098 | Acute Toxicity, Mutagenicity                                                                       |
| A06099 | Acute Toxicity                                                                                     |
| A06100 | Acute Toxicity, Mutagenicity, Tumorigenicity, Multiple Dose Effects                                |
| A06101 | Acute Toxicity                                                                                     |
| A06102 | Acute Toxicity                                                                                     |
| A06103 | Acute Toxicity, Reproductive Effects                                                               |
| A06104 | Acute Toxicity                                                                                     |
| A06105 | Acute Toxicity                                                                                     |
| A06106 | Acute Toxicity, Mutagenicity, Tumorigenicity                                                       |
| A06107 | Acute Toxicity, Skin and Eye Irritation                                                            |
| A06108 | Acute Toxicity                                                                                     |
| A06109 | Acute Toxicity                                                                                     |
| A06110 | Acute Toxicity, Mutagenicity                                                                       |
| A06111 | Acute Toxicity, Mutagenicity                                                                       |
| A06112 | Acute Toxicity                                                                                     |
| A06113 | Acute Toxicity, Skin and Eye Irritation                                                            |
| A06114 | Acute Toxicity                                                                                     |
| A06115 | Acute Toxicity                                                                                     |
| A06116 | Acute Toxicity                                                                                     |

|        |                                                                              |
|--------|------------------------------------------------------------------------------|
| A06117 | Acute Toxicity                                                               |
| A06118 | Acute Toxicity                                                               |
| A06119 | Acute Toxicity                                                               |
| A06120 | Acute Toxicity                                                               |
| A06121 | Acute Toxicity                                                               |
| A06122 | Multiple Dose Effects                                                        |
| A06123 | Tumorigenicity                                                               |
| A06124 | Acute Toxicity, Multiple Dose Effects                                        |
| A06125 | Acute Toxicity                                                               |
| A06126 | Acute Toxicity                                                               |
| A06127 | Acute Toxicity                                                               |
| A06128 | Mutagenicity                                                                 |
| A06129 | Acute Toxicity, Mutagenicity, Reproductive Effects, Multiple Dose Effects    |
| A06130 | Acute Toxicity, Tumorigenicity                                               |
| A06131 | Mutagenicity                                                                 |
| A06132 | Acute Toxicity, Mutagenicity, Skin and Eye Irritation, Multiple Dose Effects |
| A06133 | Acute Toxicity                                                               |
| A06134 | Acute Toxicity                                                               |
| A06135 | Acute Toxicity                                                               |
| A06136 | Acute Toxicity                                                               |
| A06137 | Acute Toxicity, Skin and Eye Irritation                                      |
| A06138 | Acute Toxicity, Mutagenicity                                                 |
| A06139 | Acute Toxicity, Mutagenicity, Skin and Eye Irritation                        |
| A06140 | Acute Toxicity, Multiple Dose Effects                                        |
| A06141 | Mutagenicity, Tumorigenicity                                                 |
| A06142 | Acute Toxicity                                                               |
| A06143 | Acute Toxicity, Mutagenicity, Multiple Dose Effects                          |
| A06144 | Multiple Dose Effects                                                        |
| A06145 | Acute Toxicity, Mutagenicity, Tumorigenicity                                 |
| A06146 | Acute Toxicity                                                               |
| A06147 | Acute Toxicity                                                               |
| A06148 | Mutagenicity, Tumorigenicity                                                 |
| A06149 | Acute Toxicity, Multiple Dose Effects                                        |
| A06150 | Acute Toxicity                                                               |
| A06151 | Acute Toxicity, Mutagenicity, Tumorigenicity                                 |
| A06152 | Mutagenicity                                                                 |
| A06153 | Mutagenicity                                                                 |
| A06154 | Acute Toxicity                                                               |
| A06155 | Acute Toxicity                                                               |
| A06156 | Acute Toxicity                                                               |
| A06157 | Mutagenicity                                                                 |
| A06158 | Acute Toxicity, Reproductive Effects                                         |
| A06159 | Acute Toxicity, Multiple Dose Effects                                        |
| A06160 | Acute Toxicity                                                               |
| A06161 | Acute Toxicity                                                               |
| A06162 | Mutagenicity, Tumorigenicity                                                 |

|        |                                                                                                    |
|--------|----------------------------------------------------------------------------------------------------|
| A06163 | Acute Toxicity                                                                                     |
| A06164 | Acute Toxicity                                                                                     |
| A06165 | Acute Toxicity, Multiple Dose Effects                                                              |
| A06166 | Acute Toxicity                                                                                     |
| A06167 | Acute Toxicity, Tumorigenicity, Multiple Dose Effects                                              |
| A06168 | Reproductive Effects                                                                               |
| A06169 | Non-toxicity                                                                                       |
| A06170 | Mutagenicity                                                                                       |
| A06171 | Acute Toxicity                                                                                     |
| A06172 | Mutagenicity, Reproductive Effects                                                                 |
| A06173 | Acute Toxicity                                                                                     |
| A06174 | Mutagenicity                                                                                       |
| A06175 | Acute Toxicity                                                                                     |
| A06176 | Acute Toxicity, Mutagenicity, Reproductive Effects, Multiple Dose Effects                          |
| A06177 | Acute Toxicity, Mutagenicity                                                                       |
| A06178 | Acute Toxicity                                                                                     |
| A06179 | Acute Toxicity                                                                                     |
| A06180 | Acute Toxicity                                                                                     |
| A06181 | Acute Toxicity                                                                                     |
| A06182 | Acute Toxicity                                                                                     |
| A06183 | Acute Toxicity, Mutagenicity                                                                       |
| A06184 | Acute Toxicity                                                                                     |
| A06185 | Mutagenicity                                                                                       |
| A06186 | Acute Toxicity                                                                                     |
| A06187 | Mutagenicity                                                                                       |
| A06188 | Mutagenicity                                                                                       |
| A06189 | Acute Toxicity                                                                                     |
| A06190 | Acute Toxicity, Mutagenicity, Tumorigenicity, Multiple Dose Effects                                |
| A06191 | Multiple Dose Effects                                                                              |
| A06192 | Acute Toxicity                                                                                     |
| A06193 | Tumorigenicity                                                                                     |
| A06194 | Acute Toxicity                                                                                     |
| A06195 | Acute Toxicity, Mutagenicity, Skin and Eye Irritation, Reproductive Effects, Multiple Dose Effects |
| A06196 | Mutagenicity                                                                                       |
| A06197 | Acute Toxicity                                                                                     |
| A06198 | Acute Toxicity                                                                                     |
| A06199 | Acute Toxicity, Skin and Eye Irritation                                                            |
| A06200 | Acute Toxicity, Mutagenicity                                                                       |
| A06201 | Acute Toxicity                                                                                     |
| A06202 | Acute Toxicity                                                                                     |
| A06203 | Acute Toxicity, Mutagenicity                                                                       |
| A06204 | Skin and Eye Irritation                                                                            |
| A06205 | Acute Toxicity, Multiple Dose Effects                                                              |
| A06206 | Acute Toxicity                                                                                     |
| A06207 | Acute Toxicity, Mutagenicity                                                                       |

|        |                                                                              |
|--------|------------------------------------------------------------------------------|
| A06208 | Acute Toxicity                                                               |
| A06209 | Mutagenicity                                                                 |
| A06210 | Acute Toxicity                                                               |
| A06211 | Acute Toxicity, Mutagenicity                                                 |
| A06212 | Mutagenicity, Tumorigenicity                                                 |
| A06213 | Mutagenicity                                                                 |
| A06214 | Acute Toxicity                                                               |
| A06215 | Acute Toxicity                                                               |
| A06216 | Acute Toxicity                                                               |
| A06217 | Tumorigenicity                                                               |
| A06218 | Acute Toxicity                                                               |
| A06219 | Tumorigenicity                                                               |
| A06220 | Acute Toxicity, Tumorigenicity                                               |
| A06221 | Acute Toxicity                                                               |
| A06222 | Acute Toxicity, Mutagenicity, Tumorigenicity                                 |
| A06223 | Acute Toxicity, Mutagenicity                                                 |
| A06224 | Reproductive Effects, Multiple Dose Effects                                  |
| A06225 | Mutagenicity                                                                 |
| A06226 | Acute Toxicity, Mutagenicity, Tumorigenicity                                 |
| A06227 | Acute Toxicity, Mutagenicity, Tumorigenicity                                 |
| A06228 | Acute Toxicity                                                               |
| A06229 | Acute Toxicity, Mutagenicity, Skin and Eye Irritation, Multiple Dose Effects |
| A06230 | Acute Toxicity, Reproductive Effects                                         |
| A06231 | Acute Toxicity                                                               |
| A06232 | Acute Toxicity                                                               |
| A06233 | Acute Toxicity                                                               |
| A06234 | Acute Toxicity                                                               |
| A06235 | Acute Toxicity, Skin and Eye Irritation                                      |
| A06236 | Acute Toxicity                                                               |
| A06237 | Acute Toxicity                                                               |
| A06238 | Acute Toxicity, Multiple Dose Effects                                        |
| A06239 | Acute Toxicity                                                               |
| A06240 | Acute Toxicity, Reproductive Effects, Multiple Dose Effects                  |
| A06241 | Acute Toxicity                                                               |
| A06242 | Acute Toxicity, Mutagenicity, Skin and Eye Irritation                        |
| A06243 | Reproductive Effects                                                         |
| A06244 | Acute Toxicity, Mutagenicity                                                 |
| A06245 | Acute Toxicity                                                               |
| A06246 | Acute Toxicity                                                               |
| A06247 | Acute Toxicity                                                               |
| A06248 | Acute Toxicity                                                               |
| A06249 | Acute Toxicity, Skin and Eye Irritation                                      |
| A06250 | Skin and Eye Irritation                                                      |
| A06251 | Acute Toxicity                                                               |
| A06252 | Acute Toxicity                                                               |
| A06253 | Acute Toxicity, Mutagenicity                                                 |

|        |                                                                           |
|--------|---------------------------------------------------------------------------|
| A06254 | Acute Toxicity                                                            |
| A06255 | Mutagenicity                                                              |
| A06256 | Non-toxicity                                                              |
| A06257 | Acute Toxicity                                                            |
| A06258 | Acute Toxicity                                                            |
| A06259 | Acute Toxicity                                                            |
| A06260 | Tumorigenicity                                                            |
| A06261 | Acute Toxicity                                                            |
| A06262 | Mutagenicity, Skin and Eye Irritation                                     |
| A06263 | Acute Toxicity, Mutagenicity, Multiple Dose Effects                       |
| A06264 | Mutagenicity                                                              |
| A06265 | Acute Toxicity, Skin and Eye Irritation                                   |
| A06266 | Reproductive Effects                                                      |
| A06267 | Mutagenicity                                                              |
| A06268 | Acute Toxicity                                                            |
| A06269 | Acute Toxicity, Mutagenicity, Multiple Dose Effects                       |
| A06270 | Acute Toxicity                                                            |
| A06271 | Acute Toxicity, Multiple Dose Effects                                     |
| A06272 | Acute Toxicity, Mutagenicity, Reproductive Effects, Multiple Dose Effects |
| A06273 | Multiple Dose Effects                                                     |
| A06274 | Acute Toxicity                                                            |
| A06275 | Mutagenicity                                                              |
| A06276 | Reproductive Effects                                                      |
| A06277 | Acute Toxicity, Mutagenicity, Reproductive Effects, Multiple Dose Effects |
| A06278 | Acute Toxicity, Mutagenicity, Multiple Dose Effects                       |
| A06279 | Acute Toxicity                                                            |
| A06280 | Acute Toxicity                                                            |
| A06281 | Acute Toxicity, Skin and Eye Irritation, Multiple Dose Effects            |
| A06282 | Acute Toxicity                                                            |
| A06283 | Acute Toxicity, Mutagenicity, Multiple Dose Effects                       |
| A06284 | Acute Toxicity, Mutagenicity, Tumorigenicity                              |
| A06285 | Acute Toxicity, Multiple Dose Effects                                     |
| A06286 | Acute Toxicity, Skin and Eye Irritation                                   |
| A06287 | Non-toxicity                                                              |
| A06288 | Mutagenicity                                                              |
| A06289 | Mutagenicity                                                              |
| A06290 | Reproductive Effects                                                      |
| A06291 | Acute Toxicity                                                            |
| A06292 | Acute Toxicity, Skin and Eye Irritation                                   |
| A06293 | Mutagenicity, Tumorigenicity                                              |
| A06294 | Acute Toxicity                                                            |
| A06295 | Acute Toxicity, Mutagenicity, Tumorigenicity, Reproductive Effects,       |
| A06296 | Acute Toxicity                                                            |
| A06297 | Skin and Eye Irritation, Multiple Dose Effects                            |
| A06298 | Acute Toxicity, Mutagenicity                                              |
| A06299 | Acute Toxicity                                                            |

|        |                                                                    |
|--------|--------------------------------------------------------------------|
| A06300 | Mutagenicity                                                       |
| A06301 | Acute Toxicity                                                     |
| A06302 | Acute Toxicity                                                     |
| A06303 | Acute Toxicity                                                     |
| A06304 | Acute Toxicity                                                     |
| A06305 | Acute Toxicity                                                     |
| A06306 | Acute Toxicity                                                     |
| A06307 | Mutagenicity                                                       |
| A06308 | Acute Toxicity                                                     |
| A06309 | Acute Toxicity                                                     |
| A06310 | Acute Toxicity, Mutagenicity                                       |
| A06311 | Acute Toxicity                                                     |
| A06312 | Skin and Eye Irritation                                            |
| A06313 | Acute Toxicity, Mutagenicity                                       |
| A06314 | Acute Toxicity, Mutagenicity                                       |
| A06315 | Acute Toxicity, Skin and Eye Irritation                            |
| A06316 | Acute Toxicity                                                     |
| A06317 | Acute Toxicity                                                     |
| A06318 | Acute Toxicity, Mutagenicity                                       |
| A06319 | Acute Toxicity, Mutagenicity, Multiple Dose Effects                |
| A06320 | Acute Toxicity                                                     |
| A06321 | Mutagenicity, Tumorigenicity                                       |
| A06322 | Mutagenicity                                                       |
| A06323 | Acute Toxicity                                                     |
| A06324 | Acute Toxicity                                                     |
| A06325 | Acute Toxicity, Mutagenicity, Tumorigenicity, Reproductive Effects |
| A06326 | Acute Toxicity                                                     |
| A06327 | Acute Toxicity                                                     |
| A06328 | Mutagenicity                                                       |
| A06329 | Mutagenicity, Tumorigenicity                                       |
| A06330 | Acute Toxicity                                                     |
| A06331 | Acute Toxicity                                                     |
| A06332 | Acute Toxicity                                                     |
| A06333 | Acute Toxicity, Skin and Eye Irritation                            |
| A06334 | Acute Toxicity                                                     |
| A06335 | Acute Toxicity                                                     |
| A06336 | Acute Toxicity, Mutagenicity, Tumorigenicity                       |
| A06337 | Acute Toxicity                                                     |
| A06338 | Acute Toxicity, Mutagenicity, Skin and Eye Irritation              |
| A06339 | Acute Toxicity, Mutagenicity, Reproductive Effects                 |
| A06340 | Acute Toxicity                                                     |
| A06341 | Acute Toxicity                                                     |
| A06342 | Acute Toxicity                                                     |
| A06343 | Acute Toxicity                                                     |
| A06344 | Acute Toxicity                                                     |
| A06345 | Acute Toxicity, Mutagenicity                                       |



|        |                                                                                                    |
|--------|----------------------------------------------------------------------------------------------------|
| A06346 | Mutagenicity, Tumorigenicity, Multiple Dose Effects                                                |
| A06347 | Acute Toxicity, Skin and Eye Irritation, Reproductive Effects, Multiple Dose                       |
| A06348 | Acute Toxicity, Mutagenicity, Skin and Eye Irritation, Reproductive Effects, Multiple Dose Effects |
| A06349 | Acute Toxicity                                                                                     |
| A06350 | Acute Toxicity                                                                                     |
| A06351 | Acute Toxicity                                                                                     |
| A06352 | Acute Toxicity                                                                                     |
| A06353 | Acute Toxicity                                                                                     |
| A06354 | Acute Toxicity                                                                                     |
| A06355 | Acute Toxicity                                                                                     |
| A06356 | Acute Toxicity                                                                                     |
| A06357 | Acute Toxicity                                                                                     |
| A06358 | Acute Toxicity, Mutagenicity, Skin and Eye Irritation, Multiple Dose Effects                       |
| A06359 | Acute Toxicity, Mutagenicity, Multiple Dose Effects                                                |
| A06360 | Acute Toxicity                                                                                     |
| A06361 | Skin and Eye Irritation, Reproductive Effects, Multiple Dose Effects                               |
| A06362 | Acute Toxicity                                                                                     |
| A06363 | Acute Toxicity, Skin and Eye Irritation                                                            |
| A06364 | Acute Toxicity, Mutagenicity, Tumorigenicity                                                       |
| A06365 | Acute Toxicity                                                                                     |
| A06366 | Acute Toxicity                                                                                     |
| A06367 | Acute Toxicity                                                                                     |
| A06368 | Mutagenicity, Tumorigenicity, Multiple Dose Effects                                                |
| A06369 | Acute Toxicity, Skin and Eye Irritation                                                            |
| A06370 | Acute Toxicity                                                                                     |
| A06371 | Acute Toxicity                                                                                     |
| A06372 | Acute Toxicity                                                                                     |
| A06373 | Acute Toxicity                                                                                     |
| A06374 | Acute Toxicity                                                                                     |
| A06375 | Acute Toxicity                                                                                     |
| A06376 | Acute Toxicity                                                                                     |
| A06377 | Acute Toxicity                                                                                     |
| A06378 | Acute Toxicity                                                                                     |
| A06379 | Acute Toxicity                                                                                     |
| A06380 | Acute Toxicity                                                                                     |
| A06381 | Acute Toxicity                                                                                     |
| A06382 | Acute Toxicity                                                                                     |
| A06383 | Acute Toxicity                                                                                     |
| A06384 | Acute Toxicity, Mutagenicity, Tumorigenicity                                                       |
| A06385 | Acute Toxicity, Mutagenicity, Tumorigenicity, Multiple Dose Effects                                |
| A06386 | Acute Toxicity                                                                                     |
| A06387 | Mutagenicity                                                                                       |
| A06388 | Acute Toxicity, Tumorigenicity, Reproductive Effects                                               |
| A06389 | Mutagenicity                                                                                       |
| A06390 | Acute Toxicity                                                                                     |

|        |                                                             |
|--------|-------------------------------------------------------------|
| A06391 | Acute Toxicity                                              |
| A06392 | Acute Toxicity                                              |
| A06393 | Acute Toxicity                                              |
| A06394 | Acute Toxicity                                              |
| A06395 | Acute Toxicity                                              |
| A06396 | Tumorigenicity                                              |
| A06397 | Acute Toxicity, Skin and Eye Irritation                     |
| A06398 | Acute Toxicity                                              |
| A06399 | Acute Toxicity, Skin and Eye Irritation                     |
| A06400 | Acute Toxicity                                              |
| A06401 | Acute Toxicity                                              |
| A06402 | Acute Toxicity, Reproductive Effects, Multiple Dose Effects |
| A06403 | Acute Toxicity, Reproductive Effects, Multiple Dose Effects |
| A06404 | Acute Toxicity, Mutagenicity                                |
| A06405 | Acute Toxicity, Multiple Dose Effects                       |
| A06406 | Acute Toxicity, Mutagenicity                                |
| A06407 | Acute Toxicity, Multiple Dose Effects                       |
| A06408 | Acute Toxicity, Skin and Eye Irritation                     |
| A06409 | Acute Toxicity                                              |
| A06410 | Acute Toxicity                                              |
| A06411 | Acute Toxicity                                              |
| A06412 | Acute Toxicity                                              |
| A06413 | Acute Toxicity                                              |
| A06414 | Acute Toxicity, Skin and Eye Irritation                     |
| A06415 | Acute Toxicity, Skin and Eye Irritation                     |
| A06416 | Acute Toxicity, Mutagenicity                                |
| A06417 | Acute Toxicity                                              |
| A06418 | Acute Toxicity                                              |
| A06419 | Acute Toxicity                                              |
| A06420 | Acute Toxicity                                              |
| A06421 | Acute Toxicity, Tumorigenicity                              |
| A06422 | Acute Toxicity, Skin and Eye Irritation                     |
| A06423 | Acute Toxicity                                              |
| A06424 | Mutagenicity, Tumorigenicity                                |
| A06425 | Acute Toxicity                                              |
| A06426 | Mutagenicity                                                |
| A06427 | Acute Toxicity                                              |
| A06428 | Acute Toxicity, Mutagenicity, Tumorigenicity                |
| A06429 | Tumorigenicity                                              |
| A06430 | Mutagenicity, Tumorigenicity                                |
| A06431 | Acute Toxicity                                              |
| A06432 | Acute Toxicity, Tumorigenicity                              |
| A06433 | Acute Toxicity, Multiple Dose Effects                       |
| A06434 | Mutagenicity                                                |
| A06435 | Acute Toxicity, Multiple Dose Effects                       |
| A06436 | Multiple Dose Effects                                       |

|        |                                                                                                    |
|--------|----------------------------------------------------------------------------------------------------|
| A06437 | Mutagenicity                                                                                       |
| A06438 | Acute Toxicity, Tumorigenicity, Skin and Eye Irritation                                            |
| A06439 | Mutagenicity, Multiple Dose Effects                                                                |
| A06440 | Acute Toxicity                                                                                     |
| A06441 | Acute Toxicity, Skin and Eye Irritation                                                            |
| A06442 | Acute Toxicity                                                                                     |
| A06443 | Acute Toxicity                                                                                     |
| A06444 | Acute Toxicity                                                                                     |
| A06445 | Acute Toxicity, Mutagenicity, Tumorigenicity                                                       |
| A06446 | Acute Toxicity                                                                                     |
| A06447 | Mutagenicity                                                                                       |
| A06448 | Tumorigenicity                                                                                     |
| A06449 | Acute Toxicity                                                                                     |
| A06450 | Acute Toxicity                                                                                     |
| A06451 | Acute Toxicity                                                                                     |
| A06452 | Acute Toxicity                                                                                     |
| A06453 | Acute Toxicity, Mutagenicity, Skin and Eye Irritation, Reproductive Effects, Multiple Dose Effects |
| A06454 | Acute Toxicity                                                                                     |
| A06455 | Acute Toxicity                                                                                     |
| A06456 | Acute Toxicity                                                                                     |
| A06457 | Mutagenicity                                                                                       |
| A06458 | Reproductive Effects                                                                               |
| A06459 | Mutagenicity, Tumorigenicity                                                                       |
| A06460 | Acute Toxicity                                                                                     |
| A06461 | Mutagenicity                                                                                       |
| A06462 | Mutagenicity                                                                                       |
| A06463 | Acute Toxicity, Multiple Dose Effects                                                              |
| A06464 | Mutagenicity                                                                                       |
| A06465 | Skin and Eye Irritation                                                                            |
| A06466 | Acute Toxicity, Multiple Dose Effects                                                              |
| A06467 | Acute Toxicity                                                                                     |
| A06468 | Acute Toxicity, Mutagenicity                                                                       |
| A06469 | Acute Toxicity, Mutagenicity, Skin and Eye Irritation, Reproductive Effects, Multiple Dose Effects |
| A06470 | Acute Toxicity, Skin and Eye Irritation, Multiple Dose Effects                                     |
| A06471 | Acute Toxicity, Skin and Eye Irritation                                                            |
| A06472 | Acute Toxicity, Mutagenicity, Reproductive Effects, Multiple Dose Effects                          |
| A06473 | Acute Toxicity, Mutagenicity, Reproductive Effects, Multiple Dose Effects                          |
| A06474 | Acute Toxicity                                                                                     |
| A06475 | Acute Toxicity                                                                                     |
| A06476 | Acute Toxicity, Mutagenicity, Tumorigenicity                                                       |
| A06477 | Acute Toxicity                                                                                     |
| A06478 | Acute Toxicity                                                                                     |
| A06479 | Acute Toxicity                                                                                     |
| A06480 | Mutagenicity, Tumorigenicity                                                                       |

|        |                                                                                                    |
|--------|----------------------------------------------------------------------------------------------------|
| A06481 | Acute Toxicity, Mutagenicity                                                                       |
| A06482 | Acute Toxicity                                                                                     |
| A06483 | Mutagenicity                                                                                       |
| A06484 | Mutagenicity                                                                                       |
| A06485 | Mutagenicity                                                                                       |
| A06486 | Acute Toxicity                                                                                     |
| A06487 | Acute Toxicity                                                                                     |
| A06488 | Acute Toxicity                                                                                     |
| A06489 | Acute Toxicity                                                                                     |
| A06490 | Acute Toxicity                                                                                     |
| A06491 | Acute Toxicity, Mutagenicity, Skin and Eye Irritation, Multiple Dose Effects                       |
| A06492 | Acute Toxicity                                                                                     |
| A06493 | Acute Toxicity                                                                                     |
| A06494 | Acute Toxicity, Skin and Eye Irritation                                                            |
| A06495 | Acute Toxicity                                                                                     |
| A06496 | Mutagenicity, Reproductive Effects                                                                 |
| A06497 | Acute Toxicity                                                                                     |
| A06498 | Acute Toxicity                                                                                     |
| A06499 | Skin and Eye Irritation                                                                            |
| A06500 | Acute Toxicity                                                                                     |
| A06501 | Acute Toxicity                                                                                     |
| A06502 | Acute Toxicity                                                                                     |
| A06503 | Acute Toxicity                                                                                     |
| A06504 | Acute Toxicity                                                                                     |
| A06505 | Acute Toxicity                                                                                     |
| A06506 | Acute Toxicity                                                                                     |
| A06507 | Acute Toxicity, Tumorigenicity                                                                     |
| A06508 | Acute Toxicity                                                                                     |
| A06509 | Mutagenicity                                                                                       |
| A06510 | Acute Toxicity, Skin and Eye Irritation                                                            |
| A06511 | Mutagenicity                                                                                       |
| A06512 | Acute Toxicity                                                                                     |
| A06513 | Mutagenicity                                                                                       |
| A06514 | Acute Toxicity, Reproductive Effects, Multiple Dose Effects                                        |
| A06515 | Acute Toxicity                                                                                     |
| A06516 | Mutagenicity, Tumorigenicity                                                                       |
| A06517 | Acute Toxicity, Mutagenicity, Tumorigenicity                                                       |
| A06518 | Mutagenicity                                                                                       |
| A06519 | Acute Toxicity                                                                                     |
| A06520 | Acute Toxicity, Multiple Dose Effects                                                              |
| A06521 | Acute Toxicity                                                                                     |
| A06522 | Acute Toxicity                                                                                     |
| A06523 | Acute Toxicity, Mutagenicity, Skin and Eye Irritation, Reproductive Effects, Multiple Dose Effects |
| A06524 | Acute Toxicity                                                                                     |
| A06525 | Acute Toxicity                                                                                     |

|        |                                                                                              |
|--------|----------------------------------------------------------------------------------------------|
| A06526 | Acute Toxicity                                                                               |
| A06527 | Acute Toxicity, Mutagenicity, Reproductive Effects, Multiple Dose Effects                    |
| A06528 | Acute Toxicity                                                                               |
| A06529 | Acute Toxicity                                                                               |
| A06530 | Acute Toxicity, Mutagenicity, Tumorigenicity                                                 |
| A06531 | Acute Toxicity, Reproductive Effects, Multiple Dose Effects                                  |
| A06532 | Mutagenicity                                                                                 |
| A06533 | Mutagenicity, Tumorigenicity                                                                 |
| A06534 | Acute Toxicity, Mutagenicity, Multiple Dose Effects                                          |
| A06535 | Acute Toxicity, Mutagenicity, Tumorigenicity                                                 |
| A06536 | Acute Toxicity, Mutagenicity                                                                 |
| A06537 | Non-toxicity                                                                                 |
| A06538 | Acute Toxicity, Mutagenicity                                                                 |
| A06539 | Acute Toxicity                                                                               |
| A06540 | Acute Toxicity                                                                               |
| A06541 | Tumorigenicity                                                                               |
| A06542 | Acute Toxicity                                                                               |
| A06543 | Non-toxicity                                                                                 |
| A06544 | Acute Toxicity                                                                               |
| A06545 | Acute Toxicity                                                                               |
| A06546 | Mutagenicity                                                                                 |
| A06547 | Acute Toxicity                                                                               |
| A06548 | Acute Toxicity                                                                               |
| A06549 | Mutagenicity, Tumorigenicity                                                                 |
| A06550 | Acute Toxicity                                                                               |
| A06551 | Acute Toxicity                                                                               |
| A06552 | Mutagenicity                                                                                 |
| A06553 | Acute Toxicity                                                                               |
| A06554 | Acute Toxicity, Mutagenicity                                                                 |
| A06555 | Acute Toxicity                                                                               |
| A06556 | Acute Toxicity                                                                               |
| A06557 | Acute Toxicity, Skin and Eye Irritation                                                      |
| A06558 | Acute Toxicity, Mutagenicity, Tumorigenicity, Skin and Eye Irritation, Multiple Dose Effects |
| A06559 | Acute Toxicity                                                                               |
| A06560 | Acute Toxicity                                                                               |
| A06561 | Acute Toxicity, Mutagenicity                                                                 |
| A06562 | Mutagenicity                                                                                 |
| A06563 | Acute Toxicity                                                                               |
| A06564 | Acute Toxicity                                                                               |
| A06565 | Acute Toxicity, Mutagenicity, Tumorigenicity                                                 |
| A06566 | Mutagenicity, Tumorigenicity                                                                 |
| A06567 | Acute Toxicity, Skin and Eye Irritation                                                      |
| A06568 | Acute Toxicity                                                                               |
| A06569 | Acute Toxicity                                                                               |
| A06570 | Non-toxicity                                                                                 |

|        |                                                                              |
|--------|------------------------------------------------------------------------------|
| A06571 | Tumorigenicity                                                               |
| A06572 | Acute Toxicity, Mutagenicity, Tumorigenicity, Reproductive Effects,          |
| A06573 | Acute Toxicity, Skin and Eye Irritation                                      |
| A06574 | Mutagenicity, Tumorigenicity, Multiple Dose Effects                          |
| A06575 | Acute Toxicity                                                               |
| A06576 | Acute Toxicity                                                               |
| A06577 | Acute Toxicity                                                               |
| A06578 | Reproductive Effects                                                         |
| A06579 | Acute Toxicity, Mutagenicity, Tumorigenicity, Multiple Dose Effects          |
| A06580 | Mutagenicity                                                                 |
| A06581 | Acute Toxicity, Multiple Dose Effects                                        |
| A06582 | Acute Toxicity                                                               |
| A06583 | Acute Toxicity                                                               |
| A06584 | Acute Toxicity, Tumorigenicity                                               |
| A06585 | Acute Toxicity, Mutagenicity, Multiple Dose Effects                          |
| A06586 | Acute Toxicity, Mutagenicity                                                 |
| A06587 | Acute Toxicity                                                               |
| A06588 | Mutagenicity, Reproductive Effects, Multiple Dose Effects                    |
| A06589 | Acute Toxicity                                                               |
| A06590 | Acute Toxicity                                                               |
| A06591 | Acute Toxicity, Mutagenicity, Skin and Eye Irritation, Multiple Dose Effects |
| A06592 | Acute Toxicity                                                               |
| A06593 | Acute Toxicity, Tumorigenicity, Reproductive Effects                         |
| A06594 | Acute Toxicity                                                               |
| A06595 | Acute Toxicity, Mutagenicity                                                 |
| A06596 | Acute Toxicity                                                               |
| A06597 | Acute Toxicity, Mutagenicity, Tumorigenicity, Multiple Dose Effects          |
| A06598 | Mutagenicity                                                                 |
| A06599 | Acute Toxicity, Mutagenicity, Multiple Dose Effects                          |
| A06600 | Acute Toxicity                                                               |
| A06601 | Acute Toxicity, Mutagenicity, Tumorigenicity, Multiple Dose Effects          |
| A06602 | Acute Toxicity, Mutagenicity, Reproductive Effects, Multiple Dose Effects    |
| A06603 | Mutagenicity, Tumorigenicity                                                 |
| A06604 | Acute Toxicity, Skin and Eye Irritation                                      |
| A06605 | Acute Toxicity                                                               |
| A06606 | Acute Toxicity, Skin and Eye Irritation, Multiple Dose Effects               |
| A06607 | Acute Toxicity, Mutagenicity, Tumorigenicity, Reproductive Effects,          |
| A06608 | Mutagenicity                                                                 |
| A06609 | Acute Toxicity, Mutagenicity                                                 |
| A06610 | Acute Toxicity, Mutagenicity, Skin and Eye Irritation, Multiple Dose Effects |
| A06611 | Acute Toxicity, Reproductive Effects                                         |
| A06612 | Acute Toxicity                                                               |
| A06613 | Acute Toxicity, Multiple Dose Effects                                        |
| A06614 | Acute Toxicity                                                               |
| A06615 | Mutagenicity, Reproductive Effects, Multiple Dose Effects                    |
| A06616 | Acute Toxicity                                                               |

|        |                                                                                                 |
|--------|-------------------------------------------------------------------------------------------------|
| A06617 | Acute Toxicity, Skin and Eye Irritation                                                         |
| A06618 | Acute Toxicity                                                                                  |
| A06619 | Acute Toxicity, Skin and Eye Irritation, Multiple Dose Effects                                  |
| A06620 | Acute Toxicity                                                                                  |
| A06621 | Acute Toxicity                                                                                  |
| A06622 | Acute Toxicity, Tumorigenicity, Multiple Dose Effects                                           |
| A06623 | Acute Toxicity, Mutagenicity, Tumorigenicity, Reproductive Effects,                             |
| A06624 | Acute Toxicity, Mutagenicity, Tumorigenicity                                                    |
| A06625 | Acute Toxicity, Skin and Eye Irritation, Multiple Dose Effects                                  |
| A06626 | Acute Toxicity, Mutagenicity, Tumorigenicity, Reproductive Effects                              |
| A06627 | Acute Toxicity                                                                                  |
| A06628 | Acute Toxicity                                                                                  |
| A06629 | Acute Toxicity, Mutagenicity, Tumorigenicity, Reproductive Effects                              |
| A06630 | Acute Toxicity, Reproductive Effects, Multiple Dose Effects                                     |
| A06631 | Acute Toxicity, Skin and Eye Irritation                                                         |
| A06632 | Acute Toxicity                                                                                  |
| A06633 | Acute Toxicity, Mutagenicity, Reproductive Effects, Multiple Dose Effects                       |
| A06634 | Acute Toxicity                                                                                  |
| A06635 | Acute Toxicity, Mutagenicity, Tumorigenicity, Multiple Dose Effects                             |
| A06636 | Acute Toxicity, Mutagenicity, Tumorigenicity, Skin and Eye Irritation,<br>Multiple Dose Effects |
| A06637 | Acute Toxicity, Reproductive Effects                                                            |
| A06638 | Acute Toxicity                                                                                  |
| A06639 | Acute Toxicity                                                                                  |
| A06640 | Acute Toxicity                                                                                  |
| A06641 | Acute Toxicity, Mutagenicity, Reproductive Effects                                              |
| A06642 | Mutagenicity                                                                                    |
| A06643 | Acute Toxicity, Skin and Eye Irritation                                                         |
| A06644 | Acute Toxicity, Skin and Eye Irritation                                                         |
| A06645 | Acute Toxicity, Mutagenicity                                                                    |
| A06646 | Acute Toxicity                                                                                  |
| A06647 | Acute Toxicity                                                                                  |
| A06648 | Acute Toxicity, Multiple Dose Effects                                                           |
| A06649 | Acute Toxicity                                                                                  |
| A06650 | Acute Toxicity, Mutagenicity, Tumorigenicity, Skin and Eye Irritation,                          |
| A06651 | Non-toxicity                                                                                    |
| A06652 | Acute Toxicity, Skin and Eye Irritation                                                         |
| A06653 | Acute Toxicity, Mutagenicity, Tumorigenicity, Skin and Eye Irritation,<br>Multiple Dose Effects |
| A06654 | Acute Toxicity, Mutagenicity                                                                    |
| A06655 | Mutagenicity                                                                                    |
| A06656 | Acute Toxicity                                                                                  |
| A06657 | Acute Toxicity, Skin and Eye Irritation                                                         |
| A06658 | Acute Toxicity, Skin and Eye Irritation                                                         |
| A06659 | Mutagenicity, Reproductive Effects, Multiple Dose Effects                                       |
| A06660 | Mutagenicity                                                                                    |

|        |                                                                                                    |
|--------|----------------------------------------------------------------------------------------------------|
| A06661 | Acute Toxicity, Mutagenicity, Reproductive Effects, Multiple Dose Effects                          |
| A06662 | Acute Toxicity                                                                                     |
| A06663 | Acute Toxicity, Skin and Eye Irritation                                                            |
| A06664 | Acute Toxicity, Reproductive Effects                                                               |
| A06665 | Mutagenicity                                                                                       |
| A06666 | Acute Toxicity                                                                                     |
| A06667 | Acute Toxicity                                                                                     |
| A06668 | Acute Toxicity, Reproductive Effects                                                               |
| A06669 | Reproductive Effects                                                                               |
| A06670 | Mutagenicity                                                                                       |
| A06671 | Acute Toxicity, Multiple Dose Effects                                                              |
| A06672 | Acute Toxicity                                                                                     |
| A06673 | Acute Toxicity, Multiple Dose Effects                                                              |
| A06674 | Acute Toxicity, Skin and Eye Irritation                                                            |
| A06675 | Acute Toxicity, Mutagenicity, Reproductive Effects, Multiple Dose Effects                          |
| A06676 | Acute Toxicity                                                                                     |
| A06677 | Acute Toxicity                                                                                     |
| A06678 | Acute Toxicity, Mutagenicity, Skin and Eye Irritation, Reproductive Effects, Multiple Dose Effects |
| A06679 | Acute Toxicity, Reproductive Effects, Multiple Dose Effects                                        |
| A06680 | Acute Toxicity, Mutagenicity, Reproductive Effects                                                 |
| A06681 | Acute Toxicity                                                                                     |
| A06682 | Acute Toxicity                                                                                     |
| A06683 | Acute Toxicity                                                                                     |
| A06684 | Mutagenicity                                                                                       |
| A06685 | Acute Toxicity                                                                                     |
| A06686 | Acute Toxicity, Mutagenicity, Tumorigenicity                                                       |
| A06687 | Acute Toxicity, Multiple Dose Effects                                                              |
| A06688 | Mutagenicity, Tumorigenicity, Skin and Eye Irritation, Multiple Dose Effects                       |
| A06689 | Acute Toxicity, Mutagenicity, Tumorigenicity, Reproductive Effects,                                |
| A06690 | Acute Toxicity                                                                                     |
| A06691 | Acute Toxicity                                                                                     |
| A06692 | Acute Toxicity                                                                                     |
| A06693 | Acute Toxicity, Multiple Dose Effects                                                              |
| A06694 | Acute Toxicity                                                                                     |
| A06695 | Skin and Eye Irritation                                                                            |
| A06696 | Acute Toxicity, Reproductive Effects, Multiple Dose Effects                                        |
| A06697 | Acute Toxicity, Mutagenicity, Skin and Eye Irritation, Reproductive Effects, Multiple Dose Effects |
| A06698 | Acute Toxicity                                                                                     |
| A06699 | Acute Toxicity, Multiple Dose Effects                                                              |
| A06700 | Acute Toxicity, Mutagenicity                                                                       |
| A06701 | Acute Toxicity, Mutagenicity, Tumorigenicity, Multiple Dose Effects                                |
| A06702 | Acute Toxicity                                                                                     |
| A06703 | Acute Toxicity                                                                                     |
| A06704 | Acute Toxicity                                                                                     |



|        |                                                                              |
|--------|------------------------------------------------------------------------------|
| A06705 | Reproductive Effects                                                         |
| A06706 | Acute Toxicity, Reproductive Effects, Multiple Dose Effects                  |
| A06707 | Mutagenicity                                                                 |
| A06708 | Acute Toxicity, Mutagenicity, Tumorigenicity                                 |
| A06709 | Acute Toxicity                                                               |
| A06710 | Mutagenicity                                                                 |
| A06711 | Mutagenicity, Tumorigenicity                                                 |
| A06712 | Mutagenicity                                                                 |
| A06713 | Acute Toxicity                                                               |
| A06714 | Acute Toxicity                                                               |
| A06715 | Mutagenicity                                                                 |
| A06716 | Acute Toxicity                                                               |
| A06717 | Acute Toxicity                                                               |
| A06718 | Acute Toxicity                                                               |
| A06719 | Acute Toxicity, Mutagenicity, Tumorigenicity, Multiple Dose Effects          |
| A06720 | Acute Toxicity, Mutagenicity, Tumorigenicity, Reproductive Effects           |
| A06721 | Acute Toxicity, Mutagenicity, Tumorigenicity                                 |
| A06722 | Tumorigenicity                                                               |
| A06723 | Acute Toxicity, Reproductive Effects                                         |
| A06724 | Acute Toxicity, Multiple Dose Effects                                        |
| A06725 | Acute Toxicity, Mutagenicity                                                 |
| A06726 | Tumorigenicity                                                               |
| A06727 | Acute Toxicity, Skin and Eye Irritation                                      |
| A06728 | Acute Toxicity                                                               |
| A06729 | Mutagenicity, Tumorigenicity                                                 |
| A06730 | Mutagenicity                                                                 |
| A06731 | Mutagenicity, Tumorigenicity                                                 |
| A06732 | Mutagenicity                                                                 |
| A06733 | Acute Toxicity                                                               |
| A06734 | Acute Toxicity, Skin and Eye Irritation, Reproductive Effects, Multiple Dose |
| A06735 | Mutagenicity                                                                 |
| A06736 | Acute Toxicity, Mutagenicity, Multiple Dose Effects                          |
| A06737 | Acute Toxicity                                                               |
| A06738 | Acute Toxicity                                                               |
| A06739 | Acute Toxicity, Mutagenicity, Tumorigenicity, Multiple Dose Effects          |
| A06740 | Acute Toxicity                                                               |
| A06741 | Acute Toxicity                                                               |
| A06742 | Acute Toxicity                                                               |
| A06743 | Acute Toxicity                                                               |
| A06744 | Acute Toxicity, Mutagenicity                                                 |
| A06745 | Mutagenicity                                                                 |
| A06746 | Acute Toxicity                                                               |
| A06747 | Acute Toxicity, Skin and Eye Irritation                                      |
| A06748 | Acute Toxicity                                                               |
| A06749 | Acute Toxicity, Tumorigenicity                                               |
| A06750 | Acute Toxicity                                                               |

|        |                                                                              |
|--------|------------------------------------------------------------------------------|
| A06751 | Non-toxicity                                                                 |
| A06752 | Acute Toxicity, Mutagenicity, Reproductive Effects, Multiple Dose Effects    |
| A06753 | Acute Toxicity, Mutagenicity, Multiple Dose Effects                          |
| A06754 | Mutagenicity                                                                 |
| A06755 | Acute Toxicity, Skin and Eye Irritation                                      |
| A06756 | Acute Toxicity, Mutagenicity, Tumorigenicity, Skin and Eye Irritation,       |
| A06757 | Mutagenicity                                                                 |
| A06758 | Acute Toxicity, Skin and Eye Irritation, Reproductive Effects, Multiple Dose |
| A06759 | Tumorigenicity                                                               |
| A06760 | Acute Toxicity                                                               |
| A06761 | Acute Toxicity                                                               |
| A06762 | Mutagenicity                                                                 |
| A06763 | Acute Toxicity                                                               |
| A06764 | Acute Toxicity, Mutagenicity, Multiple Dose Effects                          |
| A06765 | Acute Toxicity, Mutagenicity, Tumorigenicity, Skin and Eye Irritation,       |
| A06766 | Acute Toxicity                                                               |
| A06767 | Acute Toxicity, Skin and Eye Irritation                                      |
| A06768 | Acute Toxicity                                                               |
| A06769 | Acute Toxicity, Mutagenicity                                                 |
| A06770 | Acute Toxicity                                                               |
| A06771 | Acute Toxicity, Multiple Dose Effects                                        |
| A06772 | Mutagenicity                                                                 |
| A06773 | Acute Toxicity, Skin and Eye Irritation                                      |
| A06774 | Acute Toxicity                                                               |
| A06775 | Acute Toxicity                                                               |
| A06776 | Acute Toxicity, Mutagenicity, Tumorigenicity                                 |
| A06777 | Acute Toxicity                                                               |
| A06778 | Acute Toxicity, Mutagenicity, Multiple Dose Effects                          |
| A06779 | Mutagenicity                                                                 |
| A06780 | Acute Toxicity                                                               |
| A06781 | Acute Toxicity                                                               |
| A06782 | Acute Toxicity                                                               |
| A06783 | Acute Toxicity, Mutagenicity, Tumorigenicity                                 |
| A06784 | Acute Toxicity                                                               |
| A06785 | Acute Toxicity, Multiple Dose Effects                                        |
| A06786 | Acute Toxicity                                                               |
| A06787 | Acute Toxicity                                                               |
| A06788 | Acute Toxicity                                                               |
| A06789 | Acute Toxicity                                                               |
| A06790 | Acute Toxicity, Mutagenicity, Tumorigenicity                                 |
| A06791 | Acute Toxicity                                                               |
| A06792 | Acute Toxicity, Mutagenicity                                                 |
| A06793 | Acute Toxicity                                                               |
| A06794 | Acute Toxicity                                                               |
| A06795 | Acute Toxicity                                                               |
| A06796 | Acute Toxicity                                                               |

|        |                                                                              |
|--------|------------------------------------------------------------------------------|
| A06797 | Acute Toxicity, Skin and Eye Irritation                                      |
| A06798 | Acute Toxicity, Mutagenicity                                                 |
| A06799 | Tumorigenicity                                                               |
| A06800 | Acute Toxicity, Mutagenicity, Multiple Dose Effects                          |
| A06801 | Acute Toxicity                                                               |
| A06802 | Acute Toxicity, Mutagenicity                                                 |
| A06803 | Acute Toxicity, Multiple Dose Effects                                        |
| A06804 | Acute Toxicity                                                               |
| A06805 | Acute Toxicity                                                               |
| A06806 | Acute Toxicity                                                               |
| A06807 | Acute Toxicity                                                               |
| A06808 | Acute Toxicity                                                               |
| A06809 | Acute Toxicity                                                               |
| A06810 | Acute Toxicity, Multiple Dose Effects                                        |
| A06811 | Acute Toxicity                                                               |
| A06812 | Acute Toxicity                                                               |
| A06813 | Acute Toxicity                                                               |
| A06814 | Acute Toxicity, Multiple Dose Effects                                        |
| A06815 | Acute Toxicity                                                               |
| A06816 | Acute Toxicity                                                               |
| A06817 | Acute Toxicity                                                               |
| A06818 | Acute Toxicity, Mutagenicity                                                 |
| A06819 | Acute Toxicity, Mutagenicity, Skin and Eye Irritation, Multiple Dose Effects |
| A06820 | Mutagenicity                                                                 |
| A06821 | Mutagenicity                                                                 |
| A06822 | Skin and Eye Irritation                                                      |
| A06823 | Mutagenicity                                                                 |
| A06824 | Acute Toxicity                                                               |
| A06825 | Non-toxicity                                                                 |
| A06826 | Acute Toxicity                                                               |
| A06827 | Acute Toxicity                                                               |
| A06828 | Mutagenicity                                                                 |
| A06829 | Acute Toxicity, Mutagenicity                                                 |
| A06830 | Mutagenicity, Tumorigenicity                                                 |
| A06831 | Tumorigenicity                                                               |
| A06832 | Non-toxicity                                                                 |
| A06833 | Acute Toxicity                                                               |
| A06834 | Acute Toxicity, Mutagenicity, Tumorigenicity                                 |
| A06835 | Mutagenicity                                                                 |
| A06836 | Acute Toxicity                                                               |
| A06837 | Mutagenicity, Tumorigenicity                                                 |
| A06838 | Acute Toxicity                                                               |
| A06839 | Acute Toxicity                                                               |
| A06840 | Acute Toxicity                                                               |
| A06841 | Acute Toxicity                                                               |
| A06842 | Acute Toxicity                                                               |

|        |                                                                                                      |
|--------|------------------------------------------------------------------------------------------------------|
| A06843 | Acute Toxicity                                                                                       |
| A06844 | Acute Toxicity, Mutagenicity, Tumorigenicity                                                         |
| A06845 | Acute Toxicity                                                                                       |
| A06846 | Multiple Dose Effects                                                                                |
| A06847 | Acute Toxicity                                                                                       |
| A06848 | Acute Toxicity                                                                                       |
| A06849 | Acute Toxicity                                                                                       |
| A06850 | Acute Toxicity                                                                                       |
| A06851 | Acute Toxicity, Tumorigenicity, Skin and Eye Irritation, Reproductive Effects, Multiple Dose Effects |
| A06852 | Acute Toxicity                                                                                       |
| A06853 | Acute Toxicity                                                                                       |
| A06854 | Acute Toxicity, Reproductive Effects, Multiple Dose Effects                                          |
| A06855 | Acute Toxicity, Mutagenicity, Skin and Eye Irritation                                                |
| A06856 | Acute Toxicity                                                                                       |
| A06857 | Acute Toxicity                                                                                       |
| A06858 | Acute Toxicity                                                                                       |
| A06859 | Acute Toxicity                                                                                       |
| A06860 | Acute Toxicity, Mutagenicity, Reproductive Effects, Multiple Dose Effects                            |
| A06861 | Acute Toxicity                                                                                       |
| A06862 | Acute Toxicity                                                                                       |
| A06863 | Acute Toxicity, Mutagenicity, Skin and Eye Irritation, Reproductive Effects, Multiple Dose Effects   |
| A06864 | Acute Toxicity, Skin and Eye Irritation, Reproductive Effects, Multiple Dose                         |
| A06865 | Acute Toxicity                                                                                       |
| A06866 | Tumorigenicity                                                                                       |
| A06867 | Acute Toxicity, Tumorigenicity                                                                       |
| A06868 | Acute Toxicity, Mutagenicity, Tumorigenicity                                                         |
| A06869 | Acute Toxicity                                                                                       |
| A06870 | Acute Toxicity                                                                                       |
| A06871 | Acute Toxicity, Mutagenicity                                                                         |
| A06872 | Mutagenicity                                                                                         |
| A06873 | Acute Toxicity                                                                                       |
| A06874 | Mutagenicity                                                                                         |
| A06875 | Multiple Dose Effects                                                                                |
| A06876 | Acute Toxicity, Mutagenicity                                                                         |
| A06877 | Acute Toxicity, Mutagenicity, Skin and Eye Irritation                                                |
| A06878 | Acute Toxicity                                                                                       |
| A06879 | Mutagenicity                                                                                         |
| A06880 | Acute Toxicity                                                                                       |
| A06881 | Acute Toxicity, Mutagenicity, Reproductive Effects, Multiple Dose Effects                            |
| A06882 | Multiple Dose Effects                                                                                |
| A06883 | Acute Toxicity                                                                                       |
| A06884 | Tumorigenicity                                                                                       |
| A06885 | Acute Toxicity                                                                                       |
| A06886 | Skin and Eye Irritation                                                                              |

|        |                                                                              |
|--------|------------------------------------------------------------------------------|
| A06887 | Mutagenicity, Tumorigenicity                                                 |
| A06888 | Acute Toxicity                                                               |
| A06889 | Acute Toxicity                                                               |
| A06890 | Acute Toxicity, Reproductive Effects, Multiple Dose Effects                  |
| A06891 | Mutagenicity                                                                 |
| A06892 | Acute Toxicity                                                               |
| A06893 | Acute Toxicity, Mutagenicity, Tumorigenicity                                 |
| A06894 | Acute Toxicity, Mutagenicity, Tumorigenicity                                 |
| A06895 | Acute Toxicity, Mutagenicity, Tumorigenicity                                 |
| A06896 | Acute Toxicity, Mutagenicity, Tumorigenicity                                 |
| A06897 | Acute Toxicity                                                               |
| A06898 | Acute Toxicity                                                               |
| A06899 | Acute Toxicity, Skin and Eye Irritation                                      |
| A06900 | Acute Toxicity, Skin and Eye Irritation                                      |
| A06901 | Acute Toxicity                                                               |
| A06902 | Acute Toxicity                                                               |
| A06903 | Non-toxicity                                                                 |
| A06904 | Acute Toxicity, Mutagenicity, Skin and Eye Irritation, Multiple Dose Effects |
| A06905 | Acute Toxicity                                                               |
| A06906 | Acute Toxicity, Multiple Dose Effects                                        |
| A06907 | Acute Toxicity, Mutagenicity, Tumorigenicity, Skin and Eye Irritation,       |
| A06908 | Reproductive Effects, Multiple Dose Effects                                  |
| A06909 | Acute Toxicity                                                               |
| A06910 | Acute Toxicity                                                               |
| A06911 | Mutagenicity, Tumorigenicity                                                 |
| A06912 | Acute Toxicity, Mutagenicity                                                 |
| A06913 | Acute Toxicity, Skin and Eye Irritation                                      |
| A06914 | Acute Toxicity, Mutagenicity, Multiple Dose Effects                          |
| A06915 | Acute Toxicity, Multiple Dose Effects                                        |
| A06916 | Acute Toxicity, Mutagenicity                                                 |
| A06917 | Acute Toxicity, Multiple Dose Effects                                        |
| A06918 | Acute Toxicity                                                               |
| A06919 | Acute Toxicity                                                               |
| A06920 | Mutagenicity, Tumorigenicity                                                 |
| A06921 | Mutagenicity, Tumorigenicity                                                 |
| A06922 | Mutagenicity                                                                 |
| A06923 | Acute Toxicity                                                               |
| A06924 | Acute Toxicity, Mutagenicity, Reproductive Effects, Multiple Dose Effects    |
| A06925 | Mutagenicity, Tumorigenicity                                                 |
| A06926 | Mutagenicity, Tumorigenicity                                                 |
| A06927 | Acute Toxicity                                                               |
| A06928 | Mutagenicity                                                                 |
| A06929 | Acute Toxicity                                                               |
| A06930 | Acute Toxicity                                                               |
| A06931 | Acute Toxicity, Mutagenicity                                                 |
| A06932 | Mutagenicity, Tumorigenicity                                                 |

|        |                                                                                                 |
|--------|-------------------------------------------------------------------------------------------------|
| A06933 | Acute Toxicity                                                                                  |
| A06934 | Acute Toxicity, Mutagenicity, Multiple Dose Effects                                             |
| A06935 | Mutagenicity                                                                                    |
| A06936 | Acute Toxicity, Multiple Dose Effects                                                           |
| A06937 | Acute Toxicity                                                                                  |
| A06938 | Acute Toxicity, Reproductive Effects, Multiple Dose Effects                                     |
| A06939 | Acute Toxicity                                                                                  |
| A06940 | Acute Toxicity                                                                                  |
| A06941 | Acute Toxicity, Mutagenicity, Tumorigenicity, Reproductive Effects,                             |
| A06942 | Acute Toxicity                                                                                  |
| A06943 | Mutagenicity                                                                                    |
| A06944 | Acute Toxicity                                                                                  |
| A06945 | Non-toxicity                                                                                    |
| A06946 | Acute Toxicity, Mutagenicity, Skin and Eye Irritation                                           |
| A06947 | Acute Toxicity, Mutagenicity, Tumorigenicity, Multiple Dose Effects                             |
| A06948 | Acute Toxicity                                                                                  |
| A06949 | Acute Toxicity, Mutagenicity, Skin and Eye Irritation, Multiple Dose Effects                    |
| A06950 | Acute Toxicity, Multiple Dose Effects                                                           |
| A06951 | Acute Toxicity, Mutagenicity                                                                    |
| A06952 | Mutagenicity                                                                                    |
| A06953 | Mutagenicity, Tumorigenicity                                                                    |
| A06954 | Mutagenicity, Tumorigenicity                                                                    |
| A06955 | Acute Toxicity                                                                                  |
| A06956 | Tumorigenicity                                                                                  |
| A06957 | Acute Toxicity                                                                                  |
| A06958 | Acute Toxicity, Mutagenicity, Tumorigenicity                                                    |
| A06959 | Acute Toxicity                                                                                  |
| A06960 | Acute Toxicity                                                                                  |
| A06961 | Acute Toxicity                                                                                  |
| A06962 | Acute Toxicity                                                                                  |
| A06963 | Acute Toxicity                                                                                  |
| A06964 | Acute Toxicity                                                                                  |
| A06965 | Acute Toxicity, Reproductive Effects                                                            |
| A06966 | Acute Toxicity                                                                                  |
| A06967 | Mutagenicity, Tumorigenicity                                                                    |
| A06968 | Acute Toxicity, Reproductive Effects, Multiple Dose Effects                                     |
| A06969 | Acute Toxicity, Mutagenicity, Tumorigenicity, Skin and Eye Irritation,                          |
| A06970 | Acute Toxicity, Mutagenicity, Tumorigenicity, Skin and Eye Irritation,                          |
| A06971 | Acute Toxicity, Mutagenicity, Tumorigenicity, Skin and Eye Irritation,<br>Multiple Dose Effects |
| A06972 | Acute Toxicity, Reproductive Effects, Multiple Dose Effects                                     |
| A06973 | Acute Toxicity                                                                                  |
| A06974 | Acute Toxicity, Reproductive Effects, Multiple Dose Effects                                     |
| A06975 | Acute Toxicity, Reproductive Effects                                                            |
| A06976 | Acute Toxicity                                                                                  |
| A06977 | Acute Toxicity                                                                                  |

|        |                                                                              |
|--------|------------------------------------------------------------------------------|
| A06978 | Acute Toxicity, Multiple Dose Effects                                        |
| A06979 | Acute Toxicity, Mutagenicity, Skin and Eye Irritation, Reproductive Effects  |
| A06980 | Acute Toxicity                                                               |
| A06981 | Mutagenicity                                                                 |
| A06982 | Non-toxicity                                                                 |
| A06983 | Acute Toxicity                                                               |
| A06984 | Acute Toxicity                                                               |
| A06985 | Tumorigenicity                                                               |
| A06986 | Acute Toxicity                                                               |
| A06987 | Acute Toxicity, Multiple Dose Effects                                        |
| A06988 | Acute Toxicity, Skin and Eye Irritation, Reproductive Effects, Multiple Dose |
| A06989 | Acute Toxicity                                                               |
| A06990 | Reproductive Effects                                                         |
| A06991 | Acute Toxicity, Mutagenicity                                                 |
| A06992 | Acute Toxicity                                                               |
| A06993 | Mutagenicity, Skin and Eye Irritation                                        |
| A06994 | Acute Toxicity, Mutagenicity                                                 |
| A06995 | Mutagenicity                                                                 |
| A06996 | Mutagenicity                                                                 |
| A06997 | Acute Toxicity, Mutagenicity, Tumorigenicity, Reproductive Effects           |
| A06998 | Mutagenicity                                                                 |
| A06999 | Mutagenicity                                                                 |
| A07000 | Acute Toxicity                                                               |
| A07001 | Mutagenicity, Reproductive Effects, Multiple Dose Effects                    |
| A07002 | Acute Toxicity                                                               |
| A07003 | Acute Toxicity, Multiple Dose Effects                                        |
| A07004 | Acute Toxicity, Mutagenicity, Tumorigenicity, Reproductive Effects,          |
| A07005 | Acute Toxicity, Mutagenicity                                                 |
| A07006 | Acute Toxicity                                                               |
| A07007 | Acute Toxicity, Mutagenicity, Multiple Dose Effects                          |
| A07008 | Mutagenicity                                                                 |
| A07009 | Mutagenicity                                                                 |
| A07010 | Mutagenicity, Tumorigenicity                                                 |
| A07011 | Acute Toxicity                                                               |
| A07012 | Acute Toxicity                                                               |
| A07013 | Acute Toxicity                                                               |
| A07014 | Acute Toxicity, Mutagenicity, Tumorigenicity                                 |
| A07015 | Mutagenicity, Tumorigenicity                                                 |
| A07016 | Acute Toxicity, Skin and Eye Irritation                                      |
| A07017 | Multiple Dose Effects                                                        |
| A07018 | Acute Toxicity                                                               |
| A07019 | Acute Toxicity, Mutagenicity                                                 |
| A07020 | Acute Toxicity, Mutagenicity                                                 |
| A07021 | Mutagenicity                                                                 |
| A07022 | Skin and Eye Irritation                                                      |
| A07023 | Acute Toxicity, Skin and Eye Irritation                                      |

|        |                                                                              |
|--------|------------------------------------------------------------------------------|
| A07024 | Acute Toxicity                                                               |
| A07025 | Mutagenicity                                                                 |
| A07026 | Mutagenicity                                                                 |
| A07027 | Acute Toxicity, Mutagenicity, Multiple Dose Effects                          |
| A07028 | Acute Toxicity                                                               |
| A07029 | Acute Toxicity                                                               |
| A07030 | Mutagenicity                                                                 |
| A07031 | Mutagenicity                                                                 |
| A07032 | Acute Toxicity, Mutagenicity                                                 |
| A07033 | Acute Toxicity                                                               |
| A07034 | Acute Toxicity                                                               |
| A07035 | Acute Toxicity                                                               |
| A07036 | Mutagenicity, Tumorigenicity                                                 |
| A07037 | Acute Toxicity, Mutagenicity, Multiple Dose Effects                          |
| A07038 | Mutagenicity, Tumorigenicity                                                 |
| A07039 | Mutagenicity                                                                 |
| A07040 | Acute Toxicity                                                               |
| A07041 | Acute Toxicity                                                               |
| A07042 | Acute Toxicity                                                               |
| A07043 | Acute Toxicity                                                               |
| A07044 | Mutagenicity                                                                 |
| A07045 | Acute Toxicity, Skin and Eye Irritation, Multiple Dose Effects               |
| A07046 | Acute Toxicity                                                               |
| A07047 | Acute Toxicity                                                               |
| A07048 | Acute Toxicity                                                               |
| A07049 | Skin and Eye Irritation                                                      |
| A07050 | Acute Toxicity, Mutagenicity, Reproductive Effects                           |
| A07051 | Mutagenicity, Multiple Dose Effects                                          |
| A07052 | Acute Toxicity, Skin and Eye Irritation, Reproductive Effects, Multiple Dose |
| A07053 | Acute Toxicity, Skin and Eye Irritation                                      |
| A07054 | Acute Toxicity, Mutagenicity, Tumorigenicity, Reproductive Effects,          |
| A07055 | Acute Toxicity                                                               |
| A07056 | Acute Toxicity, Mutagenicity, Tumorigenicity                                 |
| A07057 | Acute Toxicity, Mutagenicity, Tumorigenicity                                 |
| A07058 | Acute Toxicity                                                               |
| A07059 | Acute Toxicity, Mutagenicity, Reproductive Effects, Multiple Dose Effects    |
| A07060 | Acute Toxicity                                                               |
| A07061 | Acute Toxicity                                                               |
| A07062 | Skin and Eye Irritation                                                      |
| A07063 | Tumorigenicity                                                               |
| A07064 | Mutagenicity, Tumorigenicity                                                 |
| A07065 | Tumorigenicity                                                               |
| A07066 | Tumorigenicity                                                               |
| A07067 | Acute Toxicity, Mutagenicity                                                 |
| A07068 | Mutagenicity                                                                 |
| A07069 | Mutagenicity, Tumorigenicity, Multiple Dose Effects                          |



|        |                                                                              |
|--------|------------------------------------------------------------------------------|
| A07070 | Acute Toxicity                                                               |
| A07071 | Acute Toxicity                                                               |
| A07072 | Acute Toxicity                                                               |
| A07073 | Acute Toxicity, Mutagenicity, Tumorigenicity, Reproductive Effects,          |
| A07074 | Acute Toxicity, Mutagenicity, Reproductive Effects                           |
| A07075 | Acute Toxicity                                                               |
| A07076 | Acute Toxicity, Tumorigenicity, Reproductive Effects, Multiple Dose Effects  |
| A07077 | Acute Toxicity, Skin and Eye Irritation                                      |
| A07078 | Acute Toxicity, Skin and Eye Irritation, Multiple Dose Effects               |
| A07079 | Acute Toxicity, Multiple Dose Effects                                        |
| A07080 | Acute Toxicity, Mutagenicity, Reproductive Effects, Multiple Dose Effects    |
| A07081 | Acute Toxicity, Mutagenicity, Tumorigenicity                                 |
| A07082 | Acute Toxicity                                                               |
| A07083 | Acute Toxicity, Mutagenicity, Multiple Dose Effects                          |
| A07084 | Reproductive Effects                                                         |
| A07085 | Mutagenicity, Tumorigenicity                                                 |
| A07086 | Acute Toxicity, Multiple Dose Effects                                        |
| A07087 | Acute Toxicity                                                               |
| A07088 | Acute Toxicity, Mutagenicity, Tumorigenicity, Reproductive Effects,          |
| A07089 | Acute Toxicity                                                               |
| A07090 | Acute Toxicity, Mutagenicity, Tumorigenicity, Multiple Dose Effects          |
| A07091 | Non-toxicity                                                                 |
| A07092 | Acute Toxicity                                                               |
| A07093 | Acute Toxicity                                                               |
| A07094 | Acute Toxicity                                                               |
| A07095 | Acute Toxicity                                                               |
| A07096 | Acute Toxicity                                                               |
| A07097 | Acute Toxicity, Reproductive Effects                                         |
| A07098 | Mutagenicity                                                                 |
| A07099 | Acute Toxicity                                                               |
| A07100 | Acute Toxicity                                                               |
| A07101 | Acute Toxicity, Skin and Eye Irritation, Reproductive Effects, Multiple Dose |
| A07102 | Acute Toxicity                                                               |
| A07103 | Acute Toxicity                                                               |
| A07104 | Acute Toxicity                                                               |
| A07105 | Acute Toxicity                                                               |
| A07106 | Acute Toxicity                                                               |
| A07107 | Mutagenicity                                                                 |
| A07108 | Acute Toxicity                                                               |
| A07109 | Acute Toxicity, Mutagenicity, Reproductive Effects                           |
| A07110 | Tumorigenicity                                                               |
| A07111 | Acute Toxicity, Mutagenicity, Reproductive Effects, Multiple Dose Effects    |
| A07112 | Acute Toxicity                                                               |
| A07113 | Acute Toxicity                                                               |
| A07114 | Acute Toxicity                                                               |
| A07115 | Acute Toxicity                                                               |

|        |                                                                                                       |
|--------|-------------------------------------------------------------------------------------------------------|
| A07116 | Acute Toxicity                                                                                        |
| A07117 | Mutagenicity                                                                                          |
| A07118 | Acute Toxicity                                                                                        |
| A07119 | Mutagenicity, Tumorigenicity                                                                          |
| A07120 | Acute Toxicity                                                                                        |
| A07121 | Reproductive Effects                                                                                  |
| A07122 | Acute Toxicity, Mutagenicity, Reproductive Effects, Multiple Dose Effects                             |
| A07123 | Acute Toxicity, Skin and Eye Irritation                                                               |
| A07124 | Acute Toxicity, Mutagenicity, Skin and Eye Irritation, Multiple Dose Effects                          |
| A07125 | Acute Toxicity, Skin and Eye Irritation, Multiple Dose Effects                                        |
| A07126 | Acute Toxicity, Mutagenicity, Skin and Eye Irritation                                                 |
| A07127 | Acute Toxicity, Skin and Eye Irritation                                                               |
| A07128 | Acute Toxicity, Skin and Eye Irritation                                                               |
| A07129 | Acute Toxicity, Mutagenicity, Tumorigenicity, Skin and Eye Irritation,                                |
| A07130 | Acute Toxicity, Mutagenicity, Skin and Eye Irritation                                                 |
| A07131 | Acute Toxicity                                                                                        |
| A07132 | Mutagenicity, Tumorigenicity                                                                          |
| A07133 | Acute Toxicity                                                                                        |
| A07134 | Acute Toxicity                                                                                        |
| A07135 | Acute Toxicity, Skin and Eye Irritation                                                               |
| A07136 | Acute Toxicity, Mutagenicity, Skin and Eye Irritation                                                 |
| A07137 | Acute Toxicity, Skin and Eye Irritation                                                               |
| A07138 | Acute Toxicity, Mutagenicity, Skin and Eye Irritation                                                 |
| A07139 | Acute Toxicity, Skin and Eye Irritation                                                               |
| A07140 | Acute Toxicity, Mutagenicity, Skin and Eye Irritation, Multiple Dose Effects                          |
| A07141 | Acute Toxicity, Mutagenicity, Tumorigenicity                                                          |
| A07142 | Acute Toxicity, Mutagenicity, Skin and Eye Irritation, Multiple Dose Effects                          |
| A07143 | Acute Toxicity, Mutagenicity                                                                          |
| A07144 | Acute Toxicity, Mutagenicity, Skin and Eye Irritation, Multiple Dose Effects                          |
| A07145 | Acute Toxicity, Mutagenicity, Skin and Eye Irritation, Multiple Dose Effects                          |
| A07146 | Acute Toxicity, Skin and Eye Irritation, Multiple Dose Effects                                        |
| A07147 | Acute Toxicity, Skin and Eye Irritation                                                               |
| A07148 | Acute Toxicity, Skin and Eye Irritation                                                               |
| A07149 | Acute Toxicity, Mutagenicity, Skin and Eye Irritation, Multiple Dose Effects                          |
| A07150 | Acute Toxicity, Skin and Eye Irritation                                                               |
| A07151 | Acute Toxicity, Mutagenicity                                                                          |
| A07152 | Acute Toxicity, Mutagenicity, Tumorigenicity, Skin and Eye Irritation,                                |
| A07153 | Acute Toxicity, Mutagenicity, Skin and Eye Irritation, Reproductive Effects,<br>Multiple Dose Effects |
| A07154 | Acute Toxicity, Mutagenicity, Skin and Eye Irritation, Multiple Dose Effects                          |
| A07155 | Acute Toxicity, Skin and Eye Irritation                                                               |
| A07156 | Acute Toxicity, Skin and Eye Irritation                                                               |
| A07157 | Acute Toxicity, Mutagenicity, Tumorigenicity, Skin and Eye Irritation                                 |
| A07158 | Acute Toxicity, Mutagenicity, Skin and Eye Irritation, Reproductive Effects,<br>Multiple Dose Effects |
| A07159 | Acute Toxicity, Skin and Eye Irritation                                                               |

|        |                                                                                                    |
|--------|----------------------------------------------------------------------------------------------------|
| A07160 | Acute Toxicity, Skin and Eye Irritation                                                            |
| A07161 | Mutagenicity, Skin and Eye Irritation                                                              |
| A07162 | Acute Toxicity, Mutagenicity, Tumorigenicity, Skin and Eye Irritation                              |
| A07163 | Acute Toxicity, Mutagenicity, Skin and Eye Irritation, Multiple Dose Effects                       |
| A07164 | Acute Toxicity, Mutagenicity, Skin and Eye Irritation, Reproductive Effects, Multiple Dose Effects |
| A07165 | Acute Toxicity, Mutagenicity, Tumorigenicity, Skin and Eye Irritation,                             |
| A07166 | Acute Toxicity, Mutagenicity                                                                       |
| A07167 | Acute Toxicity                                                                                     |
| A07168 | Acute Toxicity, Skin and Eye Irritation, Reproductive Effects                                      |
| A07169 | Acute Toxicity, Mutagenicity, Skin and Eye Irritation, Multiple Dose Effects                       |
| A07170 | Acute Toxicity                                                                                     |
| A07171 | Acute Toxicity                                                                                     |
| A07172 | Acute Toxicity, Skin and Eye Irritation, Multiple Dose Effects                                     |
| A07173 | Acute Toxicity, Mutagenicity, Skin and Eye Irritation, Multiple Dose Effects                       |
| A07174 | Acute Toxicity, Skin and Eye Irritation, Multiple Dose Effects                                     |
| A07175 | Mutagenicity, Tumorigenicity                                                                       |
| A07176 | Acute Toxicity                                                                                     |
| A07177 | Acute Toxicity, Mutagenicity, Tumorigenicity, Multiple Dose Effects                                |
| A07178 | Acute Toxicity, Mutagenicity, Skin and Eye Irritation, Multiple Dose Effects                       |
| A07179 | Acute Toxicity, Multiple Dose Effects                                                              |
| A07180 | Acute Toxicity, Mutagenicity, Skin and Eye Irritation, Reproductive Effects, Multiple Dose Effects |
| A07181 | Acute Toxicity                                                                                     |
| A07182 | Acute Toxicity, Skin and Eye Irritation, Reproductive Effects                                      |
| A07183 | Acute Toxicity, Skin and Eye Irritation                                                            |
| A07184 | Acute Toxicity                                                                                     |
| A07185 | Acute Toxicity, Mutagenicity                                                                       |
| A07186 | Acute Toxicity, Mutagenicity, Multiple Dose Effects                                                |
| A07187 | Acute Toxicity, Mutagenicity, Skin and Eye Irritation, Reproductive Effects, Multiple Dose Effects |
| A07188 | Acute Toxicity                                                                                     |
| A07189 | Acute Toxicity                                                                                     |
| A07190 | Acute Toxicity, Mutagenicity, Tumorigenicity, Skin and Eye Irritation,                             |
| A07191 | Acute Toxicity, Mutagenicity, Tumorigenicity, Skin and Eye Irritation,                             |
| A07192 | Acute Toxicity                                                                                     |
| A07193 | Acute Toxicity                                                                                     |
| A07194 | Acute Toxicity, Skin and Eye Irritation, Multiple Dose Effects                                     |
| A07195 | Acute Toxicity, Tumorigenicity                                                                     |
| A07196 | Acute Toxicity                                                                                     |
| A07197 | Acute Toxicity, Mutagenicity, Tumorigenicity, Skin and Eye Irritation,                             |
| A07198 | Acute Toxicity, Mutagenicity, Tumorigenicity, Skin and Eye Irritation,                             |
| A07199 | Acute Toxicity, Mutagenicity, Tumorigenicity, Reproductive Effects,                                |
| A07200 | Acute Toxicity, Mutagenicity, Tumorigenicity, Skin and Eye Irritation,                             |
| A07201 | Acute Toxicity, Mutagenicity, Tumorigenicity, Skin and Eye Irritation,                             |
| A07202 | Acute Toxicity                                                                                     |

|        |                                                                                                      |
|--------|------------------------------------------------------------------------------------------------------|
| A07203 | Acute Toxicity, Reproductive Effects                                                                 |
| A07204 | Acute Toxicity                                                                                       |
| A07205 | Acute Toxicity, Multiple Dose Effects                                                                |
| A07206 | Acute Toxicity, Tumorigenicity, Multiple Dose Effects                                                |
| A07207 | Acute Toxicity, Mutagenicity, Tumorigenicity, Reproductive Effects,                                  |
| A07208 | Acute Toxicity                                                                                       |
| A07209 | Acute Toxicity, Mutagenicity, Tumorigenicity, Skin and Eye Irritation,                               |
| A07210 | Acute Toxicity, Tumorigenicity, Skin and Eye Irritation, Reproductive Effects, Multiple Dose Effects |
| A07211 | Acute Toxicity, Skin and Eye Irritation, Multiple Dose Effects                                       |
| A07212 | Acute Toxicity, Mutagenicity, Tumorigenicity, Multiple Dose Effects                                  |
| A07213 | Acute Toxicity                                                                                       |
| A07214 | Acute Toxicity, Skin and Eye Irritation                                                              |
| A07215 | Mutagenicity, Skin and Eye Irritation                                                                |
| A07216 | Acute Toxicity, Mutagenicity, Skin and Eye Irritation, Multiple Dose Effects                         |
| A07217 | Acute Toxicity                                                                                       |
| A07218 | Acute Toxicity, Mutagenicity, Tumorigenicity, Skin and Eye Irritation, Multiple Dose Effects         |
| A07219 | Acute Toxicity, Mutagenicity, Tumorigenicity, Multiple Dose Effects                                  |
| A07220 | Acute Toxicity                                                                                       |
| A07221 | Acute Toxicity, Mutagenicity, Multiple Dose Effects                                                  |
| A07222 | Acute Toxicity                                                                                       |
| A07223 | Acute Toxicity, Skin and Eye Irritation                                                              |
| A07224 | Acute Toxicity, Mutagenicity                                                                         |
| A07225 | Acute Toxicity                                                                                       |
| A07226 | Acute Toxicity, Tumorigenicity, Multiple Dose Effects                                                |
| A07227 | Mutagenicity                                                                                         |
| A07228 | Acute Toxicity                                                                                       |
| A07229 | Acute Toxicity, Mutagenicity, Multiple Dose Effects                                                  |
| A07230 | Acute Toxicity                                                                                       |
| A07231 | Tumorigenicity, Multiple Dose Effects                                                                |
| A07232 | Acute Toxicity, Mutagenicity, Tumorigenicity, Reproductive Effects                                   |
| A07233 | Mutagenicity                                                                                         |
| A07234 | Acute Toxicity, Mutagenicity                                                                         |
| A07235 | Mutagenicity                                                                                         |
| A07236 | Acute Toxicity, Mutagenicity                                                                         |
| A07237 | Acute Toxicity                                                                                       |
| A07238 | Acute Toxicity, Mutagenicity, Multiple Dose Effects                                                  |
| A07239 | Acute Toxicity, Mutagenicity, Tumorigenicity, Multiple Dose Effects                                  |
| A07240 | Acute Toxicity                                                                                       |
| A07241 | Acute Toxicity                                                                                       |
| A07242 | Acute Toxicity, Mutagenicity, Tumorigenicity, Skin and Eye Irritation,                               |
| A07243 | Acute Toxicity                                                                                       |
| A07244 | Acute Toxicity, Reproductive Effects, Multiple Dose Effects                                          |
| A07245 | Acute Toxicity                                                                                       |
| A07246 | Mutagenicity                                                                                         |

|        |                                                                              |
|--------|------------------------------------------------------------------------------|
| A07247 | Acute Toxicity                                                               |
| A07248 | Acute Toxicity                                                               |
| A07249 | Acute Toxicity                                                               |
| A07250 | Acute Toxicity, Multiple Dose Effects                                        |
| A07251 | Acute Toxicity                                                               |
| A07252 | Acute Toxicity                                                               |
| A07253 | Acute Toxicity, Mutagenicity, Multiple Dose Effects                          |
| A07254 | Acute Toxicity                                                               |
| A07255 | Acute Toxicity, Skin and Eye Irritation                                      |
| A07256 | Acute Toxicity, Mutagenicity                                                 |
| A07257 | Mutagenicity                                                                 |
| A07258 | Acute Toxicity                                                               |
| A07259 | Acute Toxicity, Reproductive Effects                                         |
| A07260 | Mutagenicity                                                                 |
| A07261 | Acute Toxicity                                                               |
| A07262 | Acute Toxicity                                                               |
| A07263 | Acute Toxicity                                                               |
| A07264 | Acute Toxicity, Tumorigenicity, Reproductive Effects, Multiple Dose Effects  |
| A07265 | Acute Toxicity, Reproductive Effects, Multiple Dose Effects                  |
| A07266 | Acute Toxicity                                                               |
| A07267 | Acute Toxicity                                                               |
| A07268 | Mutagenicity, Tumorigenicity                                                 |
| A07269 | Acute Toxicity, Mutagenicity                                                 |
| A07270 | Mutagenicity                                                                 |
| A07271 | Acute Toxicity, Multiple Dose Effects                                        |
| A07272 | Acute Toxicity                                                               |
| A07273 | Acute Toxicity, Mutagenicity, Multiple Dose Effects                          |
| A07274 | Acute Toxicity, Mutagenicity                                                 |
| A07275 | Acute Toxicity, Tumorigenicity, Multiple Dose Effects                        |
| A07276 | Tumorigenicity                                                               |
| A07277 | Mutagenicity                                                                 |
| A07278 | Acute Toxicity, Mutagenicity                                                 |
| A07279 | Acute Toxicity, Mutagenicity                                                 |
| A07280 | Acute Toxicity, Mutagenicity, Multiple Dose Effects                          |
| A07281 | Acute Toxicity, Mutagenicity, Skin and Eye Irritation, Multiple Dose Effects |
| A07282 | Acute Toxicity, Mutagenicity, Tumorigenicity                                 |
| A07283 | Acute Toxicity, Mutagenicity, Reproductive Effects                           |
| A07284 | Non-toxicity                                                                 |
| A07285 | Acute Toxicity                                                               |
| A07286 | Mutagenicity, Tumorigenicity                                                 |
| A07287 | Acute Toxicity, Mutagenicity                                                 |
| A07288 | Acute Toxicity, Mutagenicity, Multiple Dose Effects                          |
| A07289 | Acute Toxicity, Skin and Eye Irritation                                      |
| A07290 | Acute Toxicity, Mutagenicity                                                 |
| A07291 | Acute Toxicity, Multiple Dose Effects                                        |
| A07292 | Acute Toxicity, Mutagenicity, Reproductive Effects                           |

|        |                                                                                                    |
|--------|----------------------------------------------------------------------------------------------------|
| A07293 | Mutagenicity, Tumorigenicity                                                                       |
| A07294 | Acute Toxicity, Skin and Eye Irritation, Reproductive Effects, Multiple Dose                       |
| A07295 | Acute Toxicity, Reproductive Effects, Multiple Dose Effects                                        |
| A07296 | Mutagenicity                                                                                       |
| A07297 | Mutagenicity                                                                                       |
| A07298 | Acute Toxicity                                                                                     |
| A07299 | Acute Toxicity                                                                                     |
| A07300 | Acute Toxicity                                                                                     |
| A07301 | Mutagenicity                                                                                       |
| A07302 | Reproductive Effects, Multiple Dose Effects                                                        |
| A07303 | Acute Toxicity                                                                                     |
| A07304 | Acute Toxicity, Mutagenicity, Reproductive Effects, Multiple Dose Effects                          |
| A07305 | Acute Toxicity                                                                                     |
| A07306 | Acute Toxicity                                                                                     |
| A07307 | Acute Toxicity                                                                                     |
| A07308 | Acute Toxicity, Skin and Eye Irritation, Reproductive Effects                                      |
| A07309 | Acute Toxicity, Multiple Dose Effects                                                              |
| A07310 | Mutagenicity, Tumorigenicity                                                                       |
| A07311 | Acute Toxicity, Mutagenicity, Tumorigenicity, Skin and Eye Irritation                              |
| A07312 | Acute Toxicity                                                                                     |
| A07313 | Mutagenicity                                                                                       |
| A07314 | Acute Toxicity, Mutagenicity, Skin and Eye Irritation, Reproductive Effects, Multiple Dose Effects |
| A07315 | Acute Toxicity                                                                                     |
| A07316 | Mutagenicity                                                                                       |
| A07317 | Acute Toxicity                                                                                     |
| A07318 | Mutagenicity                                                                                       |
| A07319 | Acute Toxicity, Skin and Eye Irritation, Multiple Dose Effects                                     |
| A07320 | Acute Toxicity                                                                                     |
| A07321 | Acute Toxicity, Mutagenicity, Skin and Eye Irritation, Multiple Dose Effects                       |
| A07322 | Acute Toxicity, Reproductive Effects, Multiple Dose Effects                                        |
| A07323 | Acute Toxicity                                                                                     |
| A07324 | Mutagenicity, Skin and Eye Irritation, Multiple Dose Effects                                       |
| A07325 | Acute Toxicity                                                                                     |
| A07326 | Acute Toxicity                                                                                     |
| A07327 | Acute Toxicity, Skin and Eye Irritation                                                            |
| A07328 | Acute Toxicity                                                                                     |
| A07329 | Acute Toxicity                                                                                     |
| A07330 | Mutagenicity                                                                                       |
| A07331 | Tumorigenicity                                                                                     |
| A07332 | Acute Toxicity, Reproductive Effects, Multiple Dose Effects                                        |
| A07333 | Mutagenicity                                                                                       |
| A07334 | Acute Toxicity, Skin and Eye Irritation                                                            |
| A07335 | Acute Toxicity, Mutagenicity                                                                       |
| A07336 | Acute Toxicity, Mutagenicity, Skin and Eye Irritation                                              |
| A07337 | Mutagenicity, Tumorigenicity                                                                       |

|        |                                                                                                    |
|--------|----------------------------------------------------------------------------------------------------|
| A07338 | Mutagenicity, Tumorigenicity                                                                       |
| A07339 | Mutagenicity                                                                                       |
| A07340 | Mutagenicity                                                                                       |
| A07341 | Acute Toxicity                                                                                     |
| A07342 | Acute Toxicity, Mutagenicity, Tumorigenicity, Skin and Eye Irritation,                             |
| A07343 | Acute Toxicity                                                                                     |
| A07344 | Mutagenicity                                                                                       |
| A07345 | Mutagenicity, Multiple Dose Effects                                                                |
| A07346 | Acute Toxicity, Mutagenicity, Skin and Eye Irritation, Reproductive Effects, Multiple Dose Effects |
| A07347 | Acute Toxicity, Skin and Eye Irritation                                                            |
| A07348 | Acute Toxicity                                                                                     |
| A07349 | Acute Toxicity, Reproductive Effects                                                               |
| A07350 | Acute Toxicity, Tumorigenicity                                                                     |
| A07351 | Mutagenicity, Tumorigenicity                                                                       |
| A07352 | Acute Toxicity                                                                                     |
| A07353 | Acute Toxicity                                                                                     |
| A07354 | Mutagenicity                                                                                       |
| A07355 | Acute Toxicity                                                                                     |
| A07356 | Acute Toxicity                                                                                     |
| A07357 | Acute Toxicity, Mutagenicity, Tumorigenicity                                                       |
| A07358 | Acute Toxicity, Mutagenicity                                                                       |
| A07359 | Mutagenicity                                                                                       |
| A07360 | Acute Toxicity, Skin and Eye Irritation, Multiple Dose Effects                                     |
| A07361 | Mutagenicity, Tumorigenicity                                                                       |
| A07362 | Acute Toxicity, Multiple Dose Effects                                                              |
| A07363 | Acute Toxicity, Reproductive Effects                                                               |
| A07364 | Acute Toxicity, Tumorigenicity, Multiple Dose Effects                                              |
| A07365 | Acute Toxicity, Skin and Eye Irritation, Multiple Dose Effects                                     |
| A07366 | Acute Toxicity, Skin and Eye Irritation                                                            |
| A07367 | Acute Toxicity, Multiple Dose Effects                                                              |
| A07368 | Mutagenicity                                                                                       |
| A07369 | Acute Toxicity                                                                                     |
| A07370 | Multiple Dose Effects                                                                              |
| A07371 | Acute Toxicity                                                                                     |
| A07372 | Acute Toxicity, Tumorigenicity                                                                     |
| A07373 | Acute Toxicity, Skin and Eye Irritation                                                            |
| A07374 | Acute Toxicity                                                                                     |
| A07375 | Mutagenicity                                                                                       |
| A07376 | Reproductive Effects                                                                               |
| A07377 | Acute Toxicity                                                                                     |
| A07378 | Acute Toxicity, Skin and Eye Irritation, Reproductive Effects, Multiple Dose                       |
| A07379 | Acute Toxicity                                                                                     |
| A07380 | Acute Toxicity, Reproductive Effects, Multiple Dose Effects                                        |
| A07381 | Acute Toxicity, Mutagenicity                                                                       |
| A07382 | Acute Toxicity                                                                                     |

|        |                                                                                                    |
|--------|----------------------------------------------------------------------------------------------------|
| A07383 | Tumorigenicity                                                                                     |
| A07384 | Acute Toxicity, Mutagenicity, Tumorigenicity, Reproductive Effects                                 |
| A07385 | Acute Toxicity                                                                                     |
| A07386 | Acute Toxicity, Mutagenicity, Tumorigenicity                                                       |
| A07387 | Mutagenicity                                                                                       |
| A07388 | Mutagenicity, Tumorigenicity                                                                       |
| A07389 | Acute Toxicity, Mutagenicity, Tumorigenicity, Skin and Eye Irritation,                             |
| A07390 | Acute Toxicity                                                                                     |
| A07391 | Mutagenicity, Tumorigenicity                                                                       |
| A07392 | Mutagenicity                                                                                       |
| A07393 | Acute Toxicity                                                                                     |
| A07394 | Acute Toxicity, Mutagenicity, Skin and Eye Irritation, Reproductive Effects, Multiple Dose Effects |
| A07395 | Acute Toxicity                                                                                     |
| A07396 | Mutagenicity                                                                                       |
| A07397 | Acute Toxicity                                                                                     |
| A07398 | Acute Toxicity, Mutagenicity, Reproductive Effects, Multiple Dose Effects                          |
| A07399 | Mutagenicity                                                                                       |
| A07400 | Mutagenicity                                                                                       |
| A07401 | Acute Toxicity                                                                                     |
| A07402 | Acute Toxicity, Multiple Dose Effects                                                              |
| A07403 | Acute Toxicity, Multiple Dose Effects                                                              |
| A07404 | Acute Toxicity, Tumorigenicity                                                                     |
| A07405 | Acute Toxicity                                                                                     |
| A07406 | Mutagenicity                                                                                       |
| A07407 | Acute Toxicity, Mutagenicity, Tumorigenicity, Multiple Dose Effects                                |
| A07408 | Acute Toxicity                                                                                     |
| A07409 | Acute Toxicity, Reproductive Effects, Multiple Dose Effects                                        |
| A07410 | Acute Toxicity                                                                                     |
| A07411 | Acute Toxicity                                                                                     |
| A07412 | Acute Toxicity                                                                                     |
| A07413 | Acute Toxicity, Mutagenicity, Multiple Dose Effects                                                |
| A07414 | Acute Toxicity, Multiple Dose Effects                                                              |
| A07415 | Acute Toxicity                                                                                     |
| A07416 | Acute Toxicity, Mutagenicity                                                                       |
| A07417 | Acute Toxicity, Mutagenicity, Multiple Dose Effects                                                |
| A07418 | Non-toxicity                                                                                       |
| A07419 | Acute Toxicity                                                                                     |
| A07420 | Acute Toxicity                                                                                     |
| A07421 | Acute Toxicity, Reproductive Effects                                                               |
| A07422 | Acute Toxicity, Mutagenicity, Tumorigenicity, Multiple Dose Effects                                |
| A07423 | Tumorigenicity                                                                                     |
| A07424 | Acute Toxicity, Multiple Dose Effects                                                              |
| A07425 | Acute Toxicity, Multiple Dose Effects                                                              |
| A07426 | Acute Toxicity                                                                                     |
| A07427 | Acute Toxicity                                                                                     |



|        |                                                                              |
|--------|------------------------------------------------------------------------------|
| A07428 | Mutagenicity                                                                 |
| A07429 | Acute Toxicity                                                               |
| A07430 | Acute Toxicity                                                               |
| A07431 | Mutagenicity                                                                 |
| A07432 | Acute Toxicity, Multiple Dose Effects                                        |
| A07433 | Acute Toxicity, Mutagenicity, Tumorigenicity, Reproductive Effects,          |
| A07434 | Acute Toxicity, Skin and Eye Irritation, Reproductive Effects, Multiple Dose |
| A07435 | Acute Toxicity                                                               |
| A07436 | Acute Toxicity, Reproductive Effects, Multiple Dose Effects                  |
| A07437 | Reproductive Effects                                                         |
| A07438 | Acute Toxicity, Multiple Dose Effects                                        |
| A07439 | Acute Toxicity, Skin and Eye Irritation, Reproductive Effects, Multiple Dose |
| A07440 | Acute Toxicity, Multiple Dose Effects                                        |
| A07441 | Mutagenicity, Tumorigenicity                                                 |
| A07442 | Mutagenicity                                                                 |
| A07443 | Acute Toxicity                                                               |
| A07444 | Acute Toxicity, Mutagenicity, Reproductive Effects, Multiple Dose Effects    |
| A07445 | Mutagenicity                                                                 |
| A07446 | Acute Toxicity                                                               |
| A07447 | Acute Toxicity                                                               |
| A07448 | Acute Toxicity                                                               |
| A07449 | Acute Toxicity                                                               |
| A07450 | Mutagenicity, Tumorigenicity                                                 |
| A07451 | Acute Toxicity                                                               |
| A07452 | Acute Toxicity, Reproductive Effects, Multiple Dose Effects                  |
| A07453 | Mutagenicity                                                                 |
| A07454 | Mutagenicity                                                                 |
| A07455 | Acute Toxicity, Multiple Dose Effects                                        |
| A07456 | Acute Toxicity                                                               |
| A07457 | Acute Toxicity, Mutagenicity, Multiple Dose Effects                          |
| A07458 | Acute Toxicity                                                               |
| A07459 | Acute Toxicity, Multiple Dose Effects                                        |
| A07460 | Acute Toxicity, Multiple Dose Effects                                        |
| A07461 | Acute Toxicity, Reproductive Effects, Multiple Dose Effects                  |
| A07462 | Acute Toxicity, Skin and Eye Irritation, Reproductive Effects, Multiple Dose |
| A07463 | Acute Toxicity, Mutagenicity, Multiple Dose Effects                          |
| A07464 | Acute Toxicity                                                               |
| A07465 | Mutagenicity                                                                 |
| A07466 | Acute Toxicity, Skin and Eye Irritation, Reproductive Effects, Multiple Dose |
| A07467 | Acute Toxicity                                                               |
| A07468 | Acute Toxicity, Mutagenicity, Reproductive Effects, Multiple Dose Effects    |
| A07469 | Acute Toxicity                                                               |
| A07470 | Acute Toxicity                                                               |
| A07471 | Acute Toxicity, Mutagenicity, Tumorigenicity, Reproductive Effects,          |
| A07472 | Acute Toxicity                                                               |
| A07473 | Acute Toxicity                                                               |

|        |                                                                                                    |
|--------|----------------------------------------------------------------------------------------------------|
| A07474 | Acute Toxicity                                                                                     |
| A07475 | Acute Toxicity, Mutagenicity, Reproductive Effects, Multiple Dose Effects                          |
| A07476 | Acute Toxicity                                                                                     |
| A07477 | Acute Toxicity, Mutagenicity, Reproductive Effects, Multiple Dose Effects                          |
| A07478 | Acute Toxicity                                                                                     |
| A07479 | Acute Toxicity, Mutagenicity, Tumorigenicity                                                       |
| A07480 | Acute Toxicity, Mutagenicity, Skin and Eye Irritation, Reproductive Effects, Multiple Dose Effects |
| A07481 | Acute Toxicity                                                                                     |
| A07482 | Mutagenicity                                                                                       |
| A07483 | Acute Toxicity, Mutagenicity, Reproductive Effects, Multiple Dose Effects                          |
| A07484 | Mutagenicity                                                                                       |
| A07485 | Acute Toxicity                                                                                     |
| A07486 | Acute Toxicity, Mutagenicity, Skin and Eye Irritation                                              |
| A07487 | Acute Toxicity                                                                                     |
| A07488 | Acute Toxicity                                                                                     |
| A07489 | Acute Toxicity, Mutagenicity, Tumorigenicity, Multiple Dose Effects                                |
| A07490 | Acute Toxicity, Mutagenicity, Multiple Dose Effects                                                |
| A07491 | Multiple Dose Effects                                                                              |
| A07492 | Mutagenicity                                                                                       |
| A07493 | Mutagenicity                                                                                       |
| A07494 | Mutagenicity                                                                                       |
| A07495 | Acute Toxicity, Mutagenicity, Reproductive Effects, Multiple Dose Effects                          |
| A07496 | Acute Toxicity, Reproductive Effects                                                               |
| A07497 | Multiple Dose Effects                                                                              |
| A07498 | Acute Toxicity                                                                                     |
| A07499 | Non-toxicity                                                                                       |
| A07500 | Acute Toxicity                                                                                     |
| A07501 | Acute Toxicity                                                                                     |
| A07502 | Acute Toxicity                                                                                     |
| A07503 | Acute Toxicity, Mutagenicity                                                                       |
| A07504 | Acute Toxicity                                                                                     |
| A07505 | Acute Toxicity, Mutagenicity, Reproductive Effects, Multiple Dose Effects                          |
| A07506 | Acute Toxicity                                                                                     |
| A07507 | Acute Toxicity                                                                                     |
| A07508 | Acute Toxicity, Mutagenicity                                                                       |
| A07509 | Mutagenicity, Tumorigenicity, Skin and Eye Irritation, Reproductive Effects                        |
| A07510 | Acute Toxicity                                                                                     |
| A07511 | Acute Toxicity, Mutagenicity, Tumorigenicity                                                       |
| A07512 | Acute Toxicity                                                                                     |
| A07513 | Mutagenicity                                                                                       |
| A07514 | Mutagenicity, Tumorigenicity                                                                       |
| A07515 | Acute Toxicity, Multiple Dose Effects                                                              |
| A07516 | Acute Toxicity                                                                                     |
| A07517 | Acute Toxicity                                                                                     |
| A07518 | Acute Toxicity                                                                                     |

|        |                                                                              |
|--------|------------------------------------------------------------------------------|
| A07519 | Acute Toxicity                                                               |
| A07520 | Acute Toxicity, Mutagenicity, Reproductive Effects, Multiple Dose Effects    |
| A07521 | Mutagenicity                                                                 |
| A07522 | Mutagenicity                                                                 |
| A07523 | Acute Toxicity                                                               |
| A07524 | Acute Toxicity                                                               |
| A07525 | Acute Toxicity, Skin and Eye Irritation                                      |
| A07526 | Mutagenicity, Tumorigenicity                                                 |
| A07527 | Acute Toxicity                                                               |
| A07528 | Acute Toxicity                                                               |
| A07529 | Mutagenicity, Tumorigenicity                                                 |
| A07530 | Acute Toxicity, Reproductive Effects, Multiple Dose Effects                  |
| A07531 | Acute Toxicity, Multiple Dose Effects                                        |
| A07532 | Acute Toxicity                                                               |
| A07533 | Acute Toxicity, Multiple Dose Effects                                        |
| A07534 | Non-toxicity                                                                 |
| A07535 | Acute Toxicity, Reproductive Effects                                         |
| A07536 | Acute Toxicity                                                               |
| A07537 | Acute Toxicity, Mutagenicity                                                 |
| A07538 | Acute Toxicity, Multiple Dose Effects                                        |
| A07539 | Skin and Eye Irritation                                                      |
| A07540 | Acute Toxicity                                                               |
| A07541 | Acute Toxicity, Mutagenicity, Tumorigenicity, Reproductive Effects,          |
| A07542 | Acute Toxicity, Tumorigenicity                                               |
| A07543 | Mutagenicity, Reproductive Effects, Multiple Dose Effects                    |
| A07544 | Acute Toxicity                                                               |
| A07545 | Acute Toxicity                                                               |
| A07546 | Acute Toxicity                                                               |
| A07547 | Acute Toxicity                                                               |
| A07548 | Acute Toxicity                                                               |
| A07549 | Acute Toxicity                                                               |
| A07550 | Acute Toxicity, Multiple Dose Effects                                        |
| A07551 | Acute Toxicity, Multiple Dose Effects                                        |
| A07552 | Acute Toxicity                                                               |
| A07553 | Acute Toxicity, Mutagenicity, Multiple Dose Effects                          |
| A07554 | Acute Toxicity, Mutagenicity, Reproductive Effects, Multiple Dose Effects    |
| A07555 | Mutagenicity                                                                 |
| A07556 | Acute Toxicity, Tumorigenicity, Reproductive Effects, Multiple Dose Effects  |
| A07557 | Acute Toxicity                                                               |
| A07558 | Acute Toxicity, Skin and Eye Irritation, Reproductive Effects, Multiple Dose |
| A07559 | Acute Toxicity, Mutagenicity                                                 |
| A07560 | Acute Toxicity                                                               |
| A07561 | Acute Toxicity, Mutagenicity, Tumorigenicity, Multiple Dose Effects          |
| A07562 | Multiple Dose Effects                                                        |
| A07563 | Multiple Dose Effects                                                        |
| A07564 | Acute Toxicity                                                               |

|        |                                                                                                    |
|--------|----------------------------------------------------------------------------------------------------|
| A07565 | Acute Toxicity, Multiple Dose Effects                                                              |
| A07566 | Acute Toxicity                                                                                     |
| A07567 | Acute Toxicity, Tumorigenicity, Multiple Dose Effects                                              |
| A07568 | Acute Toxicity                                                                                     |
| A07569 | Acute Toxicity                                                                                     |
| A07570 | Acute Toxicity                                                                                     |
| A07571 | Acute Toxicity, Mutagenicity                                                                       |
| A07572 | Acute Toxicity, Reproductive Effects, Multiple Dose Effects                                        |
| A07573 | Reproductive Effects                                                                               |
| A07574 | Acute Toxicity, Mutagenicity                                                                       |
| A07575 | Acute Toxicity                                                                                     |
| A07576 | Acute Toxicity                                                                                     |
| A07577 | Mutagenicity, Tumorigenicity                                                                       |
| A07578 | Mutagenicity, Tumorigenicity                                                                       |
| A07579 | Mutagenicity                                                                                       |
| A07580 | Mutagenicity, Tumorigenicity                                                                       |
| A07581 | Acute Toxicity                                                                                     |
| A07582 | Acute Toxicity                                                                                     |
| A07583 | Acute Toxicity, Mutagenicity                                                                       |
| A07584 | Non-toxicity                                                                                       |
| A07585 | Mutagenicity                                                                                       |
| A07586 | Acute Toxicity                                                                                     |
| A07587 | Acute Toxicity                                                                                     |
| A07588 | Acute Toxicity                                                                                     |
| A07589 | Acute Toxicity, Skin and Eye Irritation                                                            |
| A07590 | Acute Toxicity, Tumorigenicity, Reproductive Effects, Multiple Dose Effects                        |
| A07591 | Acute Toxicity                                                                                     |
| A07592 | Acute Toxicity, Reproductive Effects, Multiple Dose Effects                                        |
| A07593 | Acute Toxicity, Mutagenicity, Reproductive Effects, Multiple Dose Effects                          |
| A07594 | Acute Toxicity                                                                                     |
| A07595 | Mutagenicity, Reproductive Effects, Multiple Dose Effects                                          |
| A07596 | Acute Toxicity                                                                                     |
| A07597 | Non-toxicity                                                                                       |
| A07598 | Non-toxicity                                                                                       |
| A07599 | Acute Toxicity                                                                                     |
| A07600 | Mutagenicity                                                                                       |
| A07601 | Mutagenicity                                                                                       |
| A07602 | Multiple Dose Effects                                                                              |
| A07603 | Acute Toxicity, Mutagenicity, Skin and Eye Irritation, Reproductive Effects, Multiple Dose Effects |
| A07604 | Acute Toxicity, Mutagenicity                                                                       |
| A07605 | Mutagenicity, Tumorigenicity                                                                       |
| A07606 | Mutagenicity                                                                                       |
| A07607 | Acute Toxicity                                                                                     |
| A07608 | Multiple Dose Effects                                                                              |
| A07609 | Acute Toxicity, Skin and Eye Irritation, Multiple Dose Effects                                     |

|        |                                                                                                      |
|--------|------------------------------------------------------------------------------------------------------|
| A07610 | Acute Toxicity, Multiple Dose Effects                                                                |
| A07611 | Acute Toxicity, Reproductive Effects                                                                 |
| A07612 | Acute Toxicity                                                                                       |
| A07613 | Acute Toxicity, Reproductive Effects, Multiple Dose Effects                                          |
| A07614 | Acute Toxicity, Multiple Dose Effects                                                                |
| A07615 | Acute Toxicity                                                                                       |
| A07616 | Acute Toxicity, Mutagenicity                                                                         |
| A07617 | Acute Toxicity, Mutagenicity, Skin and Eye Irritation, Multiple Dose Effects                         |
| A07618 | Acute Toxicity                                                                                       |
| A07619 | Acute Toxicity                                                                                       |
| A07620 | Mutagenicity, Tumorigenicity                                                                         |
| A07621 | Acute Toxicity, Mutagenicity                                                                         |
| A07622 | Tumorigenicity                                                                                       |
| A07623 | Mutagenicity                                                                                         |
| A07624 | Acute Toxicity                                                                                       |
| A07625 | Acute Toxicity, Tumorigenicity                                                                       |
| A07626 | Mutagenicity, Tumorigenicity                                                                         |
| A07627 | Acute Toxicity                                                                                       |
| A07628 | Mutagenicity                                                                                         |
| A07629 | Acute Toxicity, Reproductive Effects, Multiple Dose Effects                                          |
| A07630 | Acute Toxicity, Multiple Dose Effects                                                                |
| A07631 | Acute Toxicity                                                                                       |
| A07632 | Acute Toxicity, Multiple Dose Effects                                                                |
| A07633 | Acute Toxicity, Reproductive Effects, Multiple Dose Effects                                          |
| A07634 | Acute Toxicity, Reproductive Effects, Multiple Dose Effects                                          |
| A07635 | Acute Toxicity, Reproductive Effects, Multiple Dose Effects                                          |
| A07636 | Mutagenicity, Reproductive Effects, Multiple Dose Effects                                            |
| A07637 | Multiple Dose Effects                                                                                |
| A07638 | Multiple Dose Effects                                                                                |
| A07639 | Multiple Dose Effects                                                                                |
| A07640 | Acute Toxicity                                                                                       |
| A07641 | Mutagenicity, Tumorigenicity                                                                         |
| A07642 | Acute Toxicity                                                                                       |
| A07643 | Acute Toxicity, Mutagenicity, Reproductive Effects, Multiple Dose Effects                            |
| A07644 | Acute Toxicity                                                                                       |
| A07645 | Acute Toxicity                                                                                       |
| A07646 | Mutagenicity, Tumorigenicity                                                                         |
| A07647 | Acute Toxicity, Skin and Eye Irritation, Reproductive Effects, Multiple Dose                         |
| A07648 | Acute Toxicity                                                                                       |
| A07649 | Acute Toxicity                                                                                       |
| A07650 | Acute Toxicity                                                                                       |
| A07651 | Acute Toxicity, Mutagenicity                                                                         |
| A07652 | Acute Toxicity                                                                                       |
| A07653 | Multiple Dose Effects                                                                                |
| A07654 | Acute Toxicity, Tumorigenicity, Skin and Eye Irritation, Reproductive Effects, Multiple Dose Effects |

|        |                                                                              |
|--------|------------------------------------------------------------------------------|
| A07655 | Acute Toxicity, Skin and Eye Irritation                                      |
| A07656 | Reproductive Effects                                                         |
| A07657 | Acute Toxicity, Multiple Dose Effects                                        |
| A07658 | Acute Toxicity                                                               |
| A07659 | Acute Toxicity, Tumorigenicity                                               |
| A07660 | Acute Toxicity, Skin and Eye Irritation, Reproductive Effects, Multiple Dose |
| A07661 | Acute Toxicity                                                               |
| A07662 | Acute Toxicity                                                               |
| A07663 | Acute Toxicity, Mutagenicity, Tumorigenicity, Multiple Dose Effects          |
| A07664 | Multiple Dose Effects                                                        |
| A07665 | Acute Toxicity, Mutagenicity                                                 |
| A07666 | Mutagenicity                                                                 |
| A07667 | Acute Toxicity, Tumorigenicity                                               |
| A07668 | Acute Toxicity                                                               |
| A07669 | Acute Toxicity                                                               |
| A07670 | Acute Toxicity, Mutagenicity, Multiple Dose Effects                          |
| A07671 | Acute Toxicity                                                               |
| A07672 | Acute Toxicity                                                               |
| A07673 | Acute Toxicity, Reproductive Effects, Multiple Dose Effects                  |
| A07674 | Acute Toxicity, Mutagenicity, Tumorigenicity, Multiple Dose Effects          |
| A07675 | Acute Toxicity, Reproductive Effects                                         |
| A07676 | Mutagenicity, Tumorigenicity                                                 |
| A07677 | Non-toxicity                                                                 |
| A07678 | Mutagenicity, Tumorigenicity                                                 |
| A07679 | Reproductive Effects                                                         |
| A07680 | Acute Toxicity                                                               |
| A07681 | Acute Toxicity                                                               |
| A07682 | Acute Toxicity, Tumorigenicity, Multiple Dose Effects                        |
| A07683 | Acute Toxicity                                                               |
| A07684 | Acute Toxicity                                                               |
| A07685 | Mutagenicity                                                                 |
| A07686 | Acute Toxicity                                                               |
| A07687 | Acute Toxicity, Mutagenicity, Multiple Dose Effects                          |
| A07688 | Acute Toxicity, Mutagenicity, Reproductive Effects, Multiple Dose Effects    |
| A07689 | Acute Toxicity                                                               |
| A07690 | Acute Toxicity, Mutagenicity                                                 |
| A07691 | Acute Toxicity                                                               |
| A07692 | Acute Toxicity, Skin and Eye Irritation                                      |
| A07693 | Acute Toxicity, Multiple Dose Effects                                        |
| A07694 | Acute Toxicity                                                               |
| A07695 | Acute Toxicity                                                               |
| A07696 | Acute Toxicity, Mutagenicity, Multiple Dose Effects                          |
| A07697 | Acute Toxicity, Tumorigenicity, Reproductive Effects, Multiple Dose Effects  |
| A07698 | Acute Toxicity                                                               |
| A07699 | Mutagenicity                                                                 |

|        |                                                                                                    |
|--------|----------------------------------------------------------------------------------------------------|
| A07700 | Acute Toxicity, Mutagenicity, Skin and Eye Irritation, Reproductive Effects, Multiple Dose Effects |
| A07701 | Mutagenicity                                                                                       |
| A07702 | Mutagenicity                                                                                       |
| A07703 | Acute Toxicity                                                                                     |
| A07704 | Mutagenicity, Tumorigenicity                                                                       |
| A07705 | Mutagenicity, Tumorigenicity                                                                       |
| A07706 | Acute Toxicity, Skin and Eye Irritation, Multiple Dose Effects                                     |
| A07707 | Acute Toxicity                                                                                     |
| A07708 | Acute Toxicity, Multiple Dose Effects                                                              |
| A07709 | Mutagenicity, Reproductive Effects                                                                 |
| A07710 | Acute Toxicity, Mutagenicity                                                                       |
| A07711 | Acute Toxicity, Mutagenicity, Tumorigenicity                                                       |
| A07712 | Acute Toxicity                                                                                     |
| A07713 | Acute Toxicity                                                                                     |
| A07714 | Mutagenicity                                                                                       |
| A07715 | Acute Toxicity                                                                                     |
| A07716 | Mutagenicity                                                                                       |
| A07717 | Acute Toxicity                                                                                     |
| A07718 | Acute Toxicity, Multiple Dose Effects                                                              |
| A07719 | Acute Toxicity                                                                                     |
| A07720 | Acute Toxicity                                                                                     |
| A07721 | Acute Toxicity, Mutagenicity, Reproductive Effects, Multiple Dose Effects                          |
| A07722 | Mutagenicity, Tumorigenicity                                                                       |
| A07723 | Acute Toxicity, Multiple Dose Effects                                                              |
| A07724 | Mutagenicity                                                                                       |
| A07725 | Tumorigenicity, Skin and Eye Irritation                                                            |
| A07726 | Acute Toxicity, Mutagenicity                                                                       |
| A07727 | Acute Toxicity, Skin and Eye Irritation                                                            |
| A07728 | Acute Toxicity                                                                                     |
| A07729 | Non-toxicity                                                                                       |
| A07730 | Acute Toxicity                                                                                     |
| A07731 | Acute Toxicity                                                                                     |
| A07732 | Acute Toxicity, Mutagenicity, Tumorigenicity, Reproductive Effects,                                |
| A07733 | Mutagenicity, Tumorigenicity                                                                       |
| A07734 | Mutagenicity, Tumorigenicity                                                                       |
| A07735 | Acute Toxicity, Mutagenicity, Tumorigenicity                                                       |
| A07736 | Acute Toxicity, Mutagenicity, Tumorigenicity, Reproductive Effects,                                |
| A07737 | Acute Toxicity                                                                                     |
| A07738 | Acute Toxicity                                                                                     |
| A07739 | Acute Toxicity                                                                                     |
| A07740 | Acute Toxicity, Tumorigenicity, Reproductive Effects, Multiple Dose Effects                        |
| A07741 | Acute Toxicity                                                                                     |
| A07742 | Acute Toxicity                                                                                     |
| A07743 | Mutagenicity                                                                                       |
| A07744 | Acute Toxicity, Multiple Dose Effects                                                              |

|        |                                                                                                      |
|--------|------------------------------------------------------------------------------------------------------|
| A07745 | Acute Toxicity                                                                                       |
| A07746 | Acute Toxicity, Mutagenicity, Reproductive Effects, Multiple Dose Effects                            |
| A07747 | Acute Toxicity                                                                                       |
| A07748 | Skin and Eye Irritation                                                                              |
| A07749 | Reproductive Effects                                                                                 |
| A07750 | Acute Toxicity                                                                                       |
| A07751 | Acute Toxicity                                                                                       |
| A07752 | Mutagenicity                                                                                         |
| A07753 | Acute Toxicity                                                                                       |
| A07754 | Acute Toxicity, Mutagenicity, Reproductive Effects, Multiple Dose Effects                            |
| A07755 | Acute Toxicity                                                                                       |
| A07756 | Acute Toxicity, Mutagenicity, Multiple Dose Effects                                                  |
| A07757 | Acute Toxicity, Tumorigenicity, Skin and Eye Irritation, Reproductive Effects, Multiple Dose Effects |
| A07758 | Mutagenicity                                                                                         |
| A07759 | Acute Toxicity                                                                                       |
| A07760 | Acute Toxicity                                                                                       |
| A07761 | Acute Toxicity                                                                                       |
| A07762 | Acute Toxicity, Mutagenicity, Reproductive Effects                                                   |
| A07763 | Acute Toxicity, Multiple Dose Effects                                                                |
| A07764 | Mutagenicity, Tumorigenicity                                                                         |
| A07765 | Mutagenicity                                                                                         |
| A07766 | Acute Toxicity, Mutagenicity, Tumorigenicity, Skin and Eye Irritation,                               |
| A07767 | Acute Toxicity                                                                                       |
| A07768 | Acute Toxicity                                                                                       |
| A07769 | Acute Toxicity                                                                                       |
| A07770 | Acute Toxicity                                                                                       |
| A07771 | Acute Toxicity, Reproductive Effects, Multiple Dose Effects                                          |
| A07772 | Mutagenicity, Tumorigenicity                                                                         |
| A07773 | Acute Toxicity, Reproductive Effects, Multiple Dose Effects                                          |
| A07774 | Mutagenicity, Tumorigenicity                                                                         |
| A07775 | Acute Toxicity                                                                                       |
| A07776 | Acute Toxicity                                                                                       |
| A07777 | Acute Toxicity                                                                                       |
| A07778 | Acute Toxicity                                                                                       |
| A07779 | Acute Toxicity, Mutagenicity                                                                         |
| A07780 | Mutagenicity                                                                                         |
| A07781 | Acute Toxicity                                                                                       |
| A07782 | Mutagenicity                                                                                         |
| A07783 | Mutagenicity                                                                                         |
| A07784 | Mutagenicity, Tumorigenicity                                                                         |
| A07785 | Mutagenicity                                                                                         |
| A07786 | Acute Toxicity                                                                                       |
| A07787 | Tumorigenicity                                                                                       |
| A07788 | Acute Toxicity                                                                                       |



|        |                                                                                                    |
|--------|----------------------------------------------------------------------------------------------------|
| A07789 | Acute Toxicity, Mutagenicity, Skin and Eye Irritation, Reproductive Effects, Multiple Dose Effects |
| A07790 | Mutagenicity, Tumorigenicity                                                                       |
| A07791 | Acute Toxicity                                                                                     |
| A07792 | Acute Toxicity                                                                                     |
| A07793 | Acute Toxicity                                                                                     |
| A07794 | Acute Toxicity, Mutagenicity, Multiple Dose Effects                                                |
| A07795 | Acute Toxicity                                                                                     |
| A07796 | Acute Toxicity, Multiple Dose Effects                                                              |
| A07797 | Acute Toxicity                                                                                     |
| A07798 | Acute Toxicity                                                                                     |
| A07799 | Acute Toxicity                                                                                     |
| A07800 | Acute Toxicity, Mutagenicity, Tumorigenicity, Skin and Eye Irritation,                             |
| A07801 | Mutagenicity                                                                                       |
| A07802 | Acute Toxicity, Multiple Dose Effects                                                              |
| A07803 | Acute Toxicity, Multiple Dose Effects                                                              |
| A07804 | Mutagenicity                                                                                       |
| A07805 | Acute Toxicity, Mutagenicity, Tumorigenicity                                                       |
| A07806 | Mutagenicity                                                                                       |
| A07807 | Acute Toxicity                                                                                     |
| A07808 | Acute Toxicity                                                                                     |
| A07809 | Acute Toxicity, Multiple Dose Effects                                                              |
| A07810 | Mutagenicity                                                                                       |
| A07811 | Acute Toxicity, Multiple Dose Effects                                                              |
| A07812 | Acute Toxicity, Multiple Dose Effects                                                              |
| A07813 | Acute Toxicity                                                                                     |
| A07814 | Acute Toxicity                                                                                     |
| A07815 | Acute Toxicity, Mutagenicity, Tumorigenicity, Skin and Eye Irritation, Multiple Dose Effects       |
| A07816 | Acute Toxicity, Mutagenicity, Multiple Dose Effects                                                |
| A07817 | Mutagenicity, Tumorigenicity                                                                       |
| A07818 | Acute Toxicity                                                                                     |
| A07819 | Multiple Dose Effects                                                                              |
| A07820 | Reproductive Effects, Multiple Dose Effects                                                        |
| A07821 | Acute Toxicity, Reproductive Effects                                                               |
| A07822 | Acute Toxicity                                                                                     |
| A07823 | Acute Toxicity                                                                                     |
| A07824 | Acute Toxicity, Mutagenicity                                                                       |
| A07825 | Acute Toxicity, Mutagenicity                                                                       |
| A07826 | Acute Toxicity, Reproductive Effects, Multiple Dose Effects                                        |
| A07827 | Acute Toxicity, Multiple Dose Effects                                                              |
| A07828 | Mutagenicity                                                                                       |
| A07829 | Mutagenicity, Tumorigenicity                                                                       |
| A07830 | Acute Toxicity                                                                                     |
| A07831 | Acute Toxicity                                                                                     |
| A07832 | Acute Toxicity                                                                                     |

|        |                                                                              |
|--------|------------------------------------------------------------------------------|
| A07833 | Acute Toxicity, Mutagenicity                                                 |
| A07834 | Acute Toxicity                                                               |
| A07835 | Acute Toxicity                                                               |
| A07836 | Mutagenicity, Tumorigenicity                                                 |
| A07837 | Mutagenicity, Tumorigenicity                                                 |
| A07838 | Mutagenicity                                                                 |
| A07839 | Acute Toxicity                                                               |
| A07840 | Acute Toxicity                                                               |
| A07841 | Tumorigenicity                                                               |
| A07842 | Acute Toxicity, Mutagenicity, Tumorigenicity                                 |
| A07843 | Mutagenicity                                                                 |
| A07844 | Acute Toxicity, Reproductive Effects, Multiple Dose Effects                  |
| A07845 | Acute Toxicity                                                               |
| A07846 | Acute Toxicity                                                               |
| A07847 | Acute Toxicity, Reproductive Effects, Multiple Dose Effects                  |
| A07848 | Acute Toxicity, Mutagenicity, Skin and Eye Irritation                        |
| A07849 | Acute Toxicity                                                               |
| A07850 | Acute Toxicity, Multiple Dose Effects                                        |
| A07851 | Acute Toxicity, Reproductive Effects, Multiple Dose Effects                  |
| A07852 | Mutagenicity, Tumorigenicity                                                 |
| A07853 | Acute Toxicity                                                               |
| A07854 | Acute Toxicity                                                               |
| A07855 | Acute Toxicity                                                               |
| A07856 | Acute Toxicity, Reproductive Effects                                         |
| A07857 | Mutagenicity, Tumorigenicity                                                 |
| A07858 | Tumorigenicity                                                               |
| A07859 | Mutagenicity, Tumorigenicity                                                 |
| A07860 | Mutagenicity, Tumorigenicity                                                 |
| A07861 | Mutagenicity, Tumorigenicity                                                 |
| A07862 | Mutagenicity, Tumorigenicity                                                 |
| A07863 | Mutagenicity, Tumorigenicity                                                 |
| A07864 | Mutagenicity, Tumorigenicity                                                 |
| A07865 | Mutagenicity, Tumorigenicity                                                 |
| A07866 | Acute Toxicity                                                               |
| A07867 | Reproductive Effects                                                         |
| A07868 | Mutagenicity                                                                 |
| A07869 | Acute Toxicity                                                               |
| A07870 | Mutagenicity                                                                 |
| A07871 | Reproductive Effects, Multiple Dose Effects                                  |
| A07872 | Acute Toxicity                                                               |
| A07873 | Acute Toxicity                                                               |
| A07874 | Acute Toxicity                                                               |
| A07875 | Acute Toxicity                                                               |
| A07876 | Acute Toxicity                                                               |
| A07877 | Mutagenicity                                                                 |
| A07878 | Acute Toxicity, Mutagenicity, Skin and Eye Irritation, Multiple Dose Effects |

|        |                                                                           |
|--------|---------------------------------------------------------------------------|
| A07879 | Acute Toxicity                                                            |
| A07880 | Acute Toxicity, Reproductive Effects, Multiple Dose Effects               |
| A07881 | Acute Toxicity, Multiple Dose Effects                                     |
| A07882 | Acute Toxicity                                                            |
| A07883 | Non-toxicity                                                              |
| A07884 | Mutagenicity                                                              |
| A07885 | Acute Toxicity, Multiple Dose Effects                                     |
| A07886 | Mutagenicity                                                              |
| A07887 | Acute Toxicity, Mutagenicity, Reproductive Effects, Multiple Dose Effects |
| A07888 | Acute Toxicity                                                            |
| A07889 | Acute Toxicity, Reproductive Effects, Multiple Dose Effects               |
| A07890 | Acute Toxicity                                                            |
| A07891 | Acute Toxicity                                                            |
| A07892 | Mutagenicity                                                              |
| A07893 | Non-toxicity                                                              |
| A07894 | Acute Toxicity, Reproductive Effects, Multiple Dose Effects               |
| A07895 | Acute Toxicity, Tumorigenicity                                            |
| A07896 | Acute Toxicity                                                            |
| A07897 | Acute Toxicity, Mutagenicity                                              |
| A07898 | Acute Toxicity, Reproductive Effects, Multiple Dose Effects               |
| A07899 | Reproductive Effects                                                      |
| A07900 | Acute Toxicity, Mutagenicity, Multiple Dose Effects                       |
| A07901 | Tumorigenicity                                                            |
| A07902 | Acute Toxicity, Reproductive Effects                                      |
| A07903 | Acute Toxicity, Mutagenicity, Tumorigenicity, Reproductive Effects        |
| A07904 | Mutagenicity, Tumorigenicity                                              |
| A07905 | Mutagenicity, Tumorigenicity                                              |
| A07906 | Mutagenicity, Tumorigenicity                                              |
| A07907 | Mutagenicity, Tumorigenicity                                              |
| A07908 | Acute Toxicity                                                            |
| A07909 | Mutagenicity, Tumorigenicity                                              |
| A07910 | Acute Toxicity, Mutagenicity, Tumorigenicity                              |
| A07911 | Acute Toxicity                                                            |
| A07912 | Acute Toxicity, Multiple Dose Effects                                     |
| A07913 | Acute Toxicity, Mutagenicity, Tumorigenicity, Reproductive Effects,       |
| A07914 | Acute Toxicity, Mutagenicity, Reproductive Effects, Multiple Dose Effects |
| A07915 | Acute Toxicity                                                            |
| A07916 | Acute Toxicity, Multiple Dose Effects                                     |
| A07917 | Tumorigenicity                                                            |
| A07918 | Acute Toxicity                                                            |
| A07919 | Acute Toxicity                                                            |
| A07920 | Acute Toxicity, Reproductive Effects                                      |
| A07921 | Acute Toxicity                                                            |
| A07922 | Acute Toxicity, Mutagenicity                                              |
| A07923 | Acute Toxicity                                                            |
| A07924 | Acute Toxicity, Reproductive Effects                                      |

|        |                                                                           |
|--------|---------------------------------------------------------------------------|
| A07925 | Acute Toxicity, Reproductive Effects, Multiple Dose Effects               |
| A07926 | Acute Toxicity                                                            |
| A07927 | Mutagenicity                                                              |
| A07928 | Acute Toxicity, Mutagenicity, Tumorigenicity, Multiple Dose Effects       |
| A07929 | Acute Toxicity                                                            |
| A07930 | Acute Toxicity                                                            |
| A07931 | Acute Toxicity, Reproductive Effects, Multiple Dose Effects               |
| A07932 | Acute Toxicity                                                            |
| A07933 | Acute Toxicity, Mutagenicity, Reproductive Effects, Multiple Dose Effects |
| A07934 | Acute Toxicity, Mutagenicity, Multiple Dose Effects                       |
| A07935 | Acute Toxicity                                                            |
| A07936 | Acute Toxicity                                                            |
| A07937 | Mutagenicity                                                              |
| A07938 | Mutagenicity                                                              |
| A07939 | Mutagenicity                                                              |
| A07940 | Acute Toxicity                                                            |
| A07941 | Acute Toxicity, Skin and Eye Irritation                                   |
| A07942 | Acute Toxicity, Mutagenicity, Multiple Dose Effects                       |
| A07943 | Mutagenicity                                                              |
| A07944 | Acute Toxicity, Mutagenicity, Tumorigenicity, Multiple Dose Effects       |
| A07945 | Mutagenicity, Tumorigenicity                                              |
| A07946 | Acute Toxicity                                                            |
| A07947 | Acute Toxicity                                                            |
| A07948 | Acute Toxicity                                                            |
| A07949 | Acute Toxicity                                                            |
| A07950 | Acute Toxicity                                                            |
| A07951 | Acute Toxicity, Reproductive Effects, Multiple Dose Effects               |
| A07952 | Skin and Eye Irritation                                                   |
| A07953 | Mutagenicity                                                              |
| A07954 | Acute Toxicity, Mutagenicity, Multiple Dose Effects                       |
| A07955 | Skin and Eye Irritation, Multiple Dose Effects                            |
| A07956 | Acute Toxicity                                                            |
| A07957 | Acute Toxicity                                                            |
| A07958 | Acute Toxicity, Mutagenicity, Tumorigenicity, Reproductive Effects,       |
| A07959 | Acute Toxicity                                                            |
| A07960 | Acute Toxicity                                                            |
| A07961 | Acute Toxicity, Skin and Eye Irritation                                   |
| A07962 | Reproductive Effects                                                      |
| A07963 | Reproductive Effects                                                      |
| A07964 | Acute Toxicity                                                            |
| A07965 | Non-toxicity                                                              |
| A07966 | Acute Toxicity                                                            |
| A07967 | Acute Toxicity, Reproductive Effects, Multiple Dose Effects               |
| A07968 | Acute Toxicity, Reproductive Effects, Multiple Dose Effects               |
| A07969 | Mutagenicity, Tumorigenicity                                              |
| A07970 | Acute Toxicity, Tumorigenicity, Multiple Dose Effects                     |

|        |                                                                             |
|--------|-----------------------------------------------------------------------------|
| A07971 | Acute Toxicity                                                              |
| A07972 | Multiple Dose Effects                                                       |
| A07973 | Acute Toxicity, Mutagenicity, Reproductive Effects, Multiple Dose Effects   |
| A07974 | Acute Toxicity                                                              |
| A07975 | Acute Toxicity                                                              |
| A07976 | Acute Toxicity, Tumorigenicity, Reproductive Effects, Multiple Dose Effects |
| A07977 | Multiple Dose Effects                                                       |
| A07978 | Mutagenicity                                                                |
| A07979 | Acute Toxicity, Mutagenicity, Tumorigenicity                                |
| A07980 | Acute Toxicity                                                              |
| A07981 | Mutagenicity                                                                |
| A07982 | Mutagenicity, Tumorigenicity                                                |
| A07983 | Acute Toxicity                                                              |
| A07984 | Tumorigenicity                                                              |
| A07985 | Acute Toxicity, Mutagenicity, Tumorigenicity, Multiple Dose Effects         |
| A07986 | Acute Toxicity                                                              |
| A07987 | Mutagenicity                                                                |
| A07988 | Acute Toxicity, Mutagenicity                                                |
| A07989 | Non-toxicity                                                                |
| A07990 | Tumorigenicity                                                              |
| A07991 | Acute Toxicity                                                              |
| A07992 | Acute Toxicity                                                              |
| A07993 | Acute Toxicity                                                              |
| A07994 | Mutagenicity, Tumorigenicity                                                |
| A07995 | Mutagenicity, Tumorigenicity                                                |
| A07996 | Acute Toxicity, Mutagenicity, Skin and Eye Irritation                       |
| A07997 | Acute Toxicity, Mutagenicity, Tumorigenicity                                |
| A07998 | Acute Toxicity                                                              |
| A07999 | Acute Toxicity                                                              |
| A08000 | Acute Toxicity, Multiple Dose Effects                                       |
| A08001 | Reproductive Effects                                                        |
| A08002 | Mutagenicity, Tumorigenicity                                                |
| A08003 | Mutagenicity                                                                |
| A08004 | Mutagenicity                                                                |
| A08005 | Mutagenicity, Tumorigenicity                                                |
| A08006 | Mutagenicity, Tumorigenicity                                                |
| A08007 | Mutagenicity, Tumorigenicity                                                |
| A08008 | Acute Toxicity, Tumorigenicity                                              |
| A08009 | Mutagenicity                                                                |
| A08010 | Acute Toxicity, Multiple Dose Effects                                       |
| A08011 | Acute Toxicity, Reproductive Effects, Multiple Dose Effects                 |
| A08012 | Acute Toxicity                                                              |
| A08013 | Acute Toxicity, Multiple Dose Effects                                       |
| A08014 | Acute Toxicity                                                              |
| A08015 | Acute Toxicity                                                              |
| A08016 | Acute Toxicity                                                              |

|        |                                                                              |
|--------|------------------------------------------------------------------------------|
| A08017 | Acute Toxicity                                                               |
| A08018 | Reproductive Effects                                                         |
| A08019 | Acute Toxicity                                                               |
| A08020 | Acute Toxicity                                                               |
| A08021 | Acute Toxicity                                                               |
| A08022 | Acute Toxicity, Skin and Eye Irritation, Reproductive Effects, Multiple Dose |
| A08023 | Mutagenicity, Tumorigenicity                                                 |
| A08024 | Acute Toxicity, Reproductive Effects                                         |
| A08025 | Mutagenicity                                                                 |
| A08026 | Acute Toxicity                                                               |
| A08027 | Acute Toxicity                                                               |
| A08028 | Acute Toxicity                                                               |
| A08029 | Non-toxicity                                                                 |
| A08030 | Reproductive Effects, Multiple Dose Effects                                  |
| A08031 | Mutagenicity                                                                 |
| A08032 | Acute Toxicity                                                               |
| A08033 | Mutagenicity                                                                 |
| A08034 | Mutagenicity                                                                 |
| A08035 | Mutagenicity                                                                 |
| A08036 | Tumorigenicity                                                               |
| A08037 | Tumorigenicity                                                               |
| A08038 | Mutagenicity                                                                 |
| A08039 | Mutagenicity, Tumorigenicity                                                 |
| A08040 | Mutagenicity, Tumorigenicity                                                 |
| A08041 | Mutagenicity, Tumorigenicity                                                 |
| A08042 | Mutagenicity                                                                 |
| A08043 | Mutagenicity, Tumorigenicity                                                 |
| A08044 | Mutagenicity, Tumorigenicity                                                 |
| A08045 | Acute Toxicity, Multiple Dose Effects                                        |
| A08046 | Mutagenicity                                                                 |
| A08047 | Mutagenicity                                                                 |
| A08048 | Acute Toxicity, Mutagenicity, Tumorigenicity                                 |
| A08049 | Acute Toxicity                                                               |
| A08050 | Acute Toxicity                                                               |
| A08051 | Acute Toxicity                                                               |
| A08052 | Acute Toxicity                                                               |
| A08053 | Acute Toxicity                                                               |
| A08054 | Acute Toxicity                                                               |
| A08055 | Mutagenicity                                                                 |
| A08056 | Acute Toxicity                                                               |
| A08057 | Acute Toxicity                                                               |
| A08058 | Acute Toxicity                                                               |
| A08059 | Acute Toxicity                                                               |
| A08060 | Acute Toxicity                                                               |
| A08061 | Acute Toxicity                                                               |
| A08062 | Acute Toxicity, Mutagenicity                                                 |

|        |                                                                           |
|--------|---------------------------------------------------------------------------|
| A08063 | Acute Toxicity                                                            |
| A08064 | Mutagenicity                                                              |
| A08065 | Acute Toxicity                                                            |
| A08066 | Acute Toxicity                                                            |
| A08067 | Acute Toxicity                                                            |
| A08068 | Acute Toxicity                                                            |
| A08069 | Acute Toxicity, Mutagenicity                                              |
| A08070 | Acute Toxicity                                                            |
| A08071 | Acute Toxicity                                                            |
| A08072 | Acute Toxicity                                                            |
| A08073 | Acute Toxicity                                                            |
| A08074 | Acute Toxicity                                                            |
| A08075 | Acute Toxicity                                                            |
| A08076 | Acute Toxicity                                                            |
| A08077 | Acute Toxicity                                                            |
| A08078 | Acute Toxicity                                                            |
| A08079 | Acute Toxicity                                                            |
| A08080 | Acute Toxicity                                                            |
| A08081 | Acute Toxicity                                                            |
| A08082 | Acute Toxicity                                                            |
| A08083 | Acute Toxicity                                                            |
| A08084 | Acute Toxicity                                                            |
| A08085 | Acute Toxicity                                                            |
| A08086 | Acute Toxicity                                                            |
| A08087 | Acute Toxicity                                                            |
| A08088 | Acute Toxicity                                                            |
| A08089 | Acute Toxicity, Mutagenicity                                              |
| A08090 | Acute Toxicity                                                            |
| A08091 | Multiple Dose Effects                                                     |
| A08092 | Acute Toxicity                                                            |
| A08093 | Acute Toxicity, Mutagenicity, Tumorigenicity, Reproductive Effects,       |
| A08094 | Acute Toxicity                                                            |
| A08095 | Acute Toxicity, Reproductive Effects                                      |
| A08096 | Acute Toxicity, Reproductive Effects                                      |
| A08097 | Acute Toxicity, Mutagenicity, Tumorigenicity, Multiple Dose Effects       |
| A08098 | Acute Toxicity, Multiple Dose Effects                                     |
| A08099 | Acute Toxicity, Mutagenicity, Reproductive Effects, Multiple Dose Effects |
| A08100 | Acute Toxicity                                                            |
| A08101 | Acute Toxicity                                                            |
| A08102 | Acute Toxicity                                                            |
| A08103 | Acute Toxicity, Multiple Dose Effects                                     |
| A08104 | Acute Toxicity                                                            |
| A08105 | Mutagenicity                                                              |
| A08106 | Mutagenicity                                                              |
| A08107 | Mutagenicity, Tumorigenicity                                              |
| A08108 | Acute Toxicity                                                            |

|        |                                                                           |
|--------|---------------------------------------------------------------------------|
| A08109 | Acute Toxicity, Multiple Dose Effects                                     |
| A08110 | Acute Toxicity                                                            |
| A08111 | Tumorigenicity, Skin and Eye Irritation                                   |
| A08112 | Mutagenicity                                                              |
| A08113 | Acute Toxicity                                                            |
| A08114 | Acute Toxicity, Tumorigenicity, Multiple Dose Effects                     |
| A08115 | Mutagenicity, Tumorigenicity                                              |
| A08116 | Mutagenicity                                                              |
| A08117 | Non-toxicity                                                              |
| A08118 | Acute Toxicity, Reproductive Effects, Multiple Dose Effects               |
| A08119 | Acute Toxicity                                                            |
| A08120 | Acute Toxicity                                                            |
| A08121 | Acute Toxicity                                                            |
| A08122 | Acute Toxicity                                                            |
| A08123 | Acute Toxicity                                                            |
| A08124 | Acute Toxicity                                                            |
| A08125 | Mutagenicity                                                              |
| A08126 | Acute Toxicity, Mutagenicity, Multiple Dose Effects                       |
| A08127 | Acute Toxicity, Mutagenicity, Reproductive Effects, Multiple Dose Effects |
| A08128 | Mutagenicity                                                              |
| A08129 | Acute Toxicity, Mutagenicity, Tumorigenicity                              |
| A08130 | Acute Toxicity, Mutagenicity, Tumorigenicity                              |
| A08131 | Acute Toxicity                                                            |
| A08132 | Acute Toxicity                                                            |
| A08133 | Acute Toxicity, Reproductive Effects, Multiple Dose Effects               |
| A08134 | Mutagenicity, Tumorigenicity                                              |
| A08135 | Acute Toxicity, Multiple Dose Effects                                     |
| A08136 | Mutagenicity                                                              |
| A08137 | Acute Toxicity, Mutagenicity                                              |
| A08138 | Acute Toxicity, Mutagenicity, Reproductive Effects, Multiple Dose Effects |
| A08139 | Acute Toxicity                                                            |
| A08140 | Mutagenicity, Tumorigenicity                                              |
| A08141 | Acute Toxicity                                                            |
| A08142 | Mutagenicity, Tumorigenicity                                              |
| A08143 | Mutagenicity, Tumorigenicity                                              |
| A08144 | Acute Toxicity, Multiple Dose Effects                                     |
| A08145 | Acute Toxicity                                                            |
| A08146 | Acute Toxicity                                                            |
| A08147 | Acute Toxicity                                                            |
| A08148 | Non-toxicity                                                              |
| A08149 | Acute Toxicity                                                            |
| A08150 | Acute Toxicity                                                            |
| A08151 | Acute Toxicity                                                            |
| A08152 | Acute Toxicity                                                            |
| A08153 | Mutagenicity                                                              |
| A08154 | Multiple Dose Effects                                                     |



|        |                                                                              |
|--------|------------------------------------------------------------------------------|
| A08155 | Acute Toxicity                                                               |
| A08156 | Acute Toxicity                                                               |
| A08157 | Mutagenicity, Tumorigenicity                                                 |
| A08158 | Mutagenicity, Tumorigenicity                                                 |
| A08159 | Acute Toxicity                                                               |
| A08160 | Acute Toxicity                                                               |
| A08161 | Acute Toxicity                                                               |
| A08162 | Mutagenicity, Tumorigenicity                                                 |
| A08163 | Mutagenicity                                                                 |
| A08164 | Acute Toxicity                                                               |
| A08165 | Multiple Dose Effects                                                        |
| A08166 | Tumorigenicity                                                               |
| A08167 | Acute Toxicity, Mutagenicity, Tumorigenicity                                 |
| A08168 | Acute Toxicity                                                               |
| A08169 | Acute Toxicity                                                               |
| A08170 | Mutagenicity, Tumorigenicity                                                 |
| A08171 | Mutagenicity, Tumorigenicity                                                 |
| A08172 | Mutagenicity, Tumorigenicity                                                 |
| A08173 | Acute Toxicity, Reproductive Effects                                         |
| A08174 | Mutagenicity                                                                 |
| A08175 | Mutagenicity                                                                 |
| A08176 | Mutagenicity                                                                 |
| A08177 | Mutagenicity, Reproductive Effects, Multiple Dose Effects                    |
| A08178 | Non-toxicity                                                                 |
| A08179 | Mutagenicity                                                                 |
| A08180 | Acute Toxicity                                                               |
| A08181 | Acute Toxicity                                                               |
| A08182 | Acute Toxicity, Reproductive Effects                                         |
| A08183 | Non-toxicity                                                                 |
| A08184 | Mutagenicity                                                                 |
| A08185 | Acute Toxicity, Mutagenicity                                                 |
| A08186 | Acute Toxicity, Mutagenicity, Tumorigenicity                                 |
| A08187 | Mutagenicity                                                                 |
| A08188 | Acute Toxicity                                                               |
| A08189 | Acute Toxicity                                                               |
| A08190 | Acute Toxicity, Multiple Dose Effects                                        |
| A08191 | Reproductive Effects                                                         |
| A08192 | Acute Toxicity, Mutagenicity, Multiple Dose Effects                          |
| A08193 | Acute Toxicity, Skin and Eye Irritation, Reproductive Effects, Multiple Dose |
| A08194 | Non-toxicity                                                                 |
| A08195 | Acute Toxicity                                                               |
| A08196 | Non-toxicity                                                                 |
| A08197 | Multiple Dose Effects                                                        |
| A08198 | Acute Toxicity                                                               |
| A08199 | Acute Toxicity, Skin and Eye Irritation, Reproductive Effects, Multiple Dose |
| A08200 | Acute Toxicity                                                               |

|        |                                                                           |
|--------|---------------------------------------------------------------------------|
| A08201 | Acute Toxicity                                                            |
| A08202 | Mutagenicity, Tumorigenicity                                              |
| A08203 | Mutagenicity, Tumorigenicity                                              |
| A08204 | Acute Toxicity                                                            |
| A08205 | Acute Toxicity                                                            |
| A08206 | Mutagenicity                                                              |
| A08207 | Acute Toxicity                                                            |
| A08208 | Acute Toxicity                                                            |
| A08209 | Skin and Eye Irritation                                                   |
| A08210 | Acute Toxicity                                                            |
| A08211 | Acute Toxicity                                                            |
| A08212 | Acute Toxicity, Mutagenicity, Reproductive Effects, Multiple Dose Effects |
| A08213 | Acute Toxicity                                                            |
| A08214 | Acute Toxicity                                                            |
| A08215 | Acute Toxicity                                                            |
| A08216 | Mutagenicity                                                              |
| A08217 | Acute Toxicity                                                            |
| A08218 | Acute Toxicity, Reproductive Effects, Multiple Dose Effects               |
| A08219 | Acute Toxicity, Reproductive Effects, Multiple Dose Effects               |
| A08220 | Mutagenicity, Tumorigenicity                                              |
| A08221 | Acute Toxicity                                                            |
| A08222 | Acute Toxicity                                                            |
| A08223 | Mutagenicity                                                              |
| A08224 | Mutagenicity, Tumorigenicity                                              |
| A08225 | Mutagenicity                                                              |
| A08226 | Mutagenicity                                                              |
| A08227 | Mutagenicity                                                              |
| A08228 | Acute Toxicity, Reproductive Effects                                      |
| A08229 | Mutagenicity                                                              |
| A08230 | Mutagenicity                                                              |
| A08231 | Mutagenicity                                                              |
| A08232 | Mutagenicity                                                              |
| A08233 | Acute Toxicity, Mutagenicity                                              |
| A08234 | Acute Toxicity                                                            |
| A08235 | Acute Toxicity                                                            |
| A08236 | Mutagenicity, Tumorigenicity                                              |
| A08237 | Mutagenicity                                                              |
| A08238 | Acute Toxicity                                                            |
| A08239 | Mutagenicity                                                              |
| A08240 | Mutagenicity                                                              |
| A08241 | Mutagenicity                                                              |
| A08242 | Acute Toxicity, Reproductive Effects, Multiple Dose Effects               |
| A08243 | Acute Toxicity                                                            |
| A08244 | Mutagenicity, Tumorigenicity                                              |
| A08245 | Acute Toxicity                                                            |
| A08246 | Acute Toxicity                                                            |

|        |                                                                              |
|--------|------------------------------------------------------------------------------|
| A08247 | Mutagenicity                                                                 |
| A08248 | Acute Toxicity                                                               |
| A08249 | Acute Toxicity, Mutagenicity, Reproductive Effects, Multiple Dose Effects    |
| A08250 | Acute Toxicity                                                               |
| A08251 | Acute Toxicity                                                               |
| A08252 | Acute Toxicity, Multiple Dose Effects                                        |
| A08253 | Mutagenicity                                                                 |
| A08254 | Mutagenicity                                                                 |
| A08255 | Reproductive Effects, Multiple Dose Effects                                  |
| A08256 | Acute Toxicity, Mutagenicity, Tumorigenicity                                 |
| A08257 | Mutagenicity                                                                 |
| A08258 | Acute Toxicity                                                               |
| A08259 | Multiple Dose Effects                                                        |
| A08260 | Acute Toxicity                                                               |
| A08261 | Acute Toxicity                                                               |
| A08262 | Acute Toxicity, Multiple Dose Effects                                        |
| A08263 | Acute Toxicity                                                               |
| A08264 | Acute Toxicity                                                               |
| A08265 | Acute Toxicity                                                               |
| A08266 | Mutagenicity, Tumorigenicity                                                 |
| A08267 | Acute Toxicity                                                               |
| A08268 | Tumorigenicity                                                               |
| A08269 | Acute Toxicity, Multiple Dose Effects                                        |
| A08270 | Mutagenicity                                                                 |
| A08271 | Mutagenicity                                                                 |
| A08272 | Non-toxicity                                                                 |
| A08273 | Acute Toxicity                                                               |
| A08274 | Acute Toxicity, Mutagenicity                                                 |
| A08275 | Acute Toxicity                                                               |
| A08276 | Mutagenicity                                                                 |
| A08277 | Acute Toxicity, Reproductive Effects, Multiple Dose Effects                  |
| A08278 | Acute Toxicity, Skin and Eye Irritation                                      |
| A08279 | Acute Toxicity                                                               |
| A08280 | Acute Toxicity, Reproductive Effects, Multiple Dose Effects                  |
| A08281 | Acute Toxicity                                                               |
| A08282 | Acute Toxicity, Mutagenicity                                                 |
| A08283 | Acute Toxicity, Reproductive Effects                                         |
| A08284 | Acute Toxicity, Skin and Eye Irritation                                      |
| A08285 | Tumorigenicity                                                               |
| A08286 | Mutagenicity, Tumorigenicity                                                 |
| A08287 | Acute Toxicity, Mutagenicity, Reproductive Effects, Multiple Dose Effects    |
| A08288 | Mutagenicity                                                                 |
| A08289 | Acute Toxicity, Mutagenicity, Skin and Eye Irritation, Multiple Dose Effects |
| A08290 | Acute Toxicity                                                               |
| A08291 | Mutagenicity                                                                 |
| A08292 | Mutagenicity, Tumorigenicity                                                 |

|        |                                                                           |
|--------|---------------------------------------------------------------------------|
| A08293 | Acute Toxicity, Mutagenicity, Tumorigenicity, Reproductive Effects,       |
| A08294 | Mutagenicity, Tumorigenicity                                              |
| A08295 | Acute Toxicity                                                            |
| A08296 | Acute Toxicity, Mutagenicity, Skin and Eye Irritation                     |
| A08297 | Acute Toxicity                                                            |
| A08298 | Mutagenicity                                                              |
| A08299 | Mutagenicity                                                              |
| A08300 | Multiple Dose Effects                                                     |
| A08301 | Acute Toxicity                                                            |
| A08302 | Mutagenicity, Tumorigenicity                                              |
| A08303 | Mutagenicity, Tumorigenicity                                              |
| A08304 | Acute Toxicity, Multiple Dose Effects                                     |
| A08305 | Mutagenicity                                                              |
| A08306 | Mutagenicity, Tumorigenicity                                              |
| A08307 | Mutagenicity                                                              |
| A08308 | Mutagenicity                                                              |
| A08309 | Mutagenicity, Tumorigenicity, Reproductive Effects, Multiple Dose Effects |
| A08310 | Mutagenicity                                                              |
| A08311 | Mutagenicity                                                              |
| A08312 | Acute Toxicity                                                            |
| A08313 | Acute Toxicity, Multiple Dose Effects                                     |
| A08314 | Mutagenicity                                                              |
| A08315 | Acute Toxicity                                                            |
| A08316 | Acute Toxicity                                                            |
| A08317 | Acute Toxicity                                                            |
| A08318 | Acute Toxicity                                                            |
| A08319 | Acute Toxicity, Multiple Dose Effects                                     |
| A08320 | Mutagenicity                                                              |
| A08321 | Tumorigenicity                                                            |
| A08322 | Mutagenicity                                                              |
| A08323 | Acute Toxicity, Mutagenicity, Tumorigenicity, Multiple Dose Effects       |
| A08324 | Acute Toxicity, Multiple Dose Effects                                     |
| A08325 | Tumorigenicity                                                            |
| A08326 | Acute Toxicity                                                            |
| A08327 | Acute Toxicity, Multiple Dose Effects                                     |
| A08328 | Acute Toxicity, Mutagenicity, Tumorigenicity                              |
| A08329 | Acute Toxicity, Tumorigenicity                                            |
| A08330 | Acute Toxicity, Multiple Dose Effects                                     |
| A08331 | Acute Toxicity                                                            |
| A08332 | Acute Toxicity                                                            |
| A08333 | Acute Toxicity                                                            |
| A08334 | Acute Toxicity                                                            |
| A08335 | Acute Toxicity                                                            |
| A08336 | Mutagenicity                                                              |
| A08337 | Acute Toxicity                                                            |
| A08338 | Acute Toxicity                                                            |

|        |                                                                                                      |
|--------|------------------------------------------------------------------------------------------------------|
| A08339 | Acute Toxicity                                                                                       |
| A08340 | Acute Toxicity                                                                                       |
| A08341 | Acute Toxicity                                                                                       |
| A08342 | Mutagenicity                                                                                         |
| A08343 | Acute Toxicity, Reproductive Effects, Multiple Dose Effects                                          |
| A08344 | Acute Toxicity                                                                                       |
| A08345 | Acute Toxicity                                                                                       |
| A08346 | Acute Toxicity, Skin and Eye Irritation                                                              |
| A08347 | Acute Toxicity                                                                                       |
| A08348 | Tumorigenicity                                                                                       |
| A08349 | Acute Toxicity                                                                                       |
| A08350 | Mutagenicity                                                                                         |
| A08351 | Acute Toxicity                                                                                       |
| A08352 | Acute Toxicity, Mutagenicity, Multiple Dose Effects                                                  |
| A08353 | Acute Toxicity                                                                                       |
| A08354 | Acute Toxicity                                                                                       |
| A08355 | Multiple Dose Effects                                                                                |
| A08356 | Acute Toxicity, Tumorigenicity, Skin and Eye Irritation, Reproductive Effects, Multiple Dose Effects |
| A08357 | Acute Toxicity, Multiple Dose Effects                                                                |
| A08358 | Acute Toxicity                                                                                       |
| A08359 | Acute Toxicity, Multiple Dose Effects                                                                |
| A08360 | Non-toxicity                                                                                         |
| A08361 | Mutagenicity                                                                                         |
| A08362 | Tumorigenicity, Multiple Dose Effects                                                                |
| A08363 | Acute Toxicity                                                                                       |
| A08364 | Acute Toxicity                                                                                       |
| A08365 | Acute Toxicity, Mutagenicity                                                                         |
| A08366 | Acute Toxicity                                                                                       |
| A08367 | Acute Toxicity, Multiple Dose Effects                                                                |
| A08368 | Acute Toxicity                                                                                       |
| A08369 | Acute Toxicity, Reproductive Effects, Multiple Dose Effects                                          |
| A08370 | Acute Toxicity, Mutagenicity, Multiple Dose Effects                                                  |
| A08371 | Acute Toxicity                                                                                       |
| A08372 | Acute Toxicity, Reproductive Effects                                                                 |
| A08373 | Mutagenicity                                                                                         |
| A08374 | Acute Toxicity, Mutagenicity, Tumorigenicity                                                         |
| A08375 | Acute Toxicity                                                                                       |
| A08376 | Acute Toxicity                                                                                       |
| A08377 | Acute Toxicity, Multiple Dose Effects                                                                |
| A08378 | Acute Toxicity                                                                                       |
| A08379 | Acute Toxicity, Mutagenicity, Reproductive Effects, Multiple Dose Effects                            |
| A08380 | Mutagenicity                                                                                         |
| A08381 | Acute Toxicity, Multiple Dose Effects                                                                |
| A08382 | Acute Toxicity, Reproductive Effects, Multiple Dose Effects                                          |
| A08383 | Acute Toxicity                                                                                       |

|        |                                                             |
|--------|-------------------------------------------------------------|
| A08384 | Mutagenicity                                                |
| A08385 | Acute Toxicity, Reproductive Effects, Multiple Dose Effects |
| A08386 | Mutagenicity                                                |
| A08387 | Acute Toxicity, Mutagenicity, Tumorigenicity                |
| A08388 | Reproductive Effects                                        |
| A08389 | Mutagenicity, Tumorigenicity, Reproductive Effects          |
| A08390 | Acute Toxicity                                              |
| A08391 | Acute Toxicity, Mutagenicity                                |
| A08392 | Mutagenicity                                                |
| A08393 | Mutagenicity                                                |
| A08394 | Acute Toxicity                                              |
| A08395 | Acute Toxicity                                              |
| A08396 | Acute Toxicity                                              |
| A08397 | Mutagenicity, Tumorigenicity                                |
| A08398 | Acute Toxicity                                              |
| A08399 | Mutagenicity                                                |
| A08400 | Acute Toxicity, Reproductive Effects, Multiple Dose Effects |
| A08401 | Mutagenicity                                                |
| A08402 | Non-toxicity                                                |
| A08403 | Acute Toxicity                                              |
| A08404 | Mutagenicity                                                |
| A08405 | Mutagenicity                                                |
| A08406 | Mutagenicity                                                |
| A08407 | Mutagenicity                                                |
| A08408 | Acute Toxicity                                              |
| A08409 | Acute Toxicity, Mutagenicity                                |
| A08410 | Acute Toxicity, Multiple Dose Effects                       |
| A08411 | Acute Toxicity                                              |
| A08412 | Mutagenicity, Tumorigenicity                                |
| A08413 | Acute Toxicity                                              |
| A08414 | Acute Toxicity                                              |
| A08415 | Mutagenicity                                                |
| A08416 | Mutagenicity                                                |
| A08417 | Acute Toxicity                                              |
| A08418 | Acute Toxicity, Mutagenicity                                |
| A08419 | Acute Toxicity                                              |
| A08420 | Acute Toxicity                                              |
| A08421 | Acute Toxicity                                              |
| A08422 | Acute Toxicity                                              |
| A08423 | Acute Toxicity                                              |
| A08424 | Acute Toxicity                                              |
| A08425 | Mutagenicity                                                |
| A08426 | Mutagenicity, Tumorigenicity, Multiple Dose Effects         |
| A08427 | Mutagenicity                                                |
| A08428 | Mutagenicity                                                |
| A08429 | Mutagenicity                                                |

|        |                                                                             |
|--------|-----------------------------------------------------------------------------|
| A08430 | Multiple Dose Effects                                                       |
| A08431 | Acute Toxicity                                                              |
| A08432 | Acute Toxicity                                                              |
| A08433 | Acute Toxicity                                                              |
| A08434 | Acute Toxicity                                                              |
| A08435 | Acute Toxicity, Multiple Dose Effects                                       |
| A08436 | Mutagenicity                                                                |
| A08437 | Acute Toxicity, Multiple Dose Effects                                       |
| A08438 | Acute Toxicity                                                              |
| A08439 | Acute Toxicity, Multiple Dose Effects                                       |
| A08440 | Mutagenicity                                                                |
| A08441 | Acute Toxicity                                                              |
| A08442 | Acute Toxicity                                                              |
| A08443 | Acute Toxicity                                                              |
| A08444 | Acute Toxicity                                                              |
| A08445 | Acute Toxicity                                                              |
| A08446 | Acute Toxicity                                                              |
| A08447 | Multiple Dose Effects                                                       |
| A08448 | Mutagenicity, Tumorigenicity                                                |
| A08449 | Mutagenicity                                                                |
| A08450 | Acute Toxicity                                                              |
| A08451 | Mutagenicity                                                                |
| A08452 | Acute Toxicity, Multiple Dose Effects                                       |
| A08453 | Mutagenicity                                                                |
| A08454 | Mutagenicity                                                                |
| A08455 | Mutagenicity                                                                |
| A08456 | Acute Toxicity                                                              |
| A08457 | Acute Toxicity, Reproductive Effects, Multiple Dose Effects                 |
| A08458 | Mutagenicity                                                                |
| A08459 | Mutagenicity                                                                |
| A08460 | Acute Toxicity                                                              |
| A08461 | Acute Toxicity, Tumorigenicity, Reproductive Effects, Multiple Dose Effects |
| A08462 | Acute Toxicity                                                              |
| A08463 | Skin and Eye Irritation, Multiple Dose Effects                              |
| A08464 | Acute Toxicity, Mutagenicity                                                |
| A08465 | Acute Toxicity, Multiple Dose Effects                                       |
| A08466 | Non-toxicity                                                                |
| A08467 | Non-toxicity                                                                |
| A08468 | Mutagenicity                                                                |
| A08469 | Mutagenicity                                                                |
| A08470 | Acute Toxicity                                                              |
| A08471 | Acute Toxicity                                                              |
| A08472 | Acute Toxicity                                                              |
| A08473 | Acute Toxicity                                                              |
| A08474 | Mutagenicity                                                                |
| A08475 | Mutagenicity                                                                |

|        |                                                             |
|--------|-------------------------------------------------------------|
| A08476 | Acute Toxicity, Reproductive Effects                        |
| A08477 | Acute Toxicity, Multiple Dose Effects                       |
| A08478 | Acute Toxicity                                              |
| A08479 | Mutagenicity                                                |
| A08480 | Acute Toxicity                                              |
| A08481 | Acute Toxicity                                              |
| A08482 | Acute Toxicity                                              |
| A08483 | Acute Toxicity                                              |
| A08484 | Tumorigenicity, Multiple Dose Effects                       |
| A08485 | Acute Toxicity                                              |
| A08486 | Mutagenicity                                                |
| A08487 | Mutagenicity                                                |
| A08488 | Acute Toxicity                                              |
| A08489 | Acute Toxicity                                              |
| A08490 | Multiple Dose Effects                                       |
| A08491 | Reproductive Effects                                        |
| A08492 | Acute Toxicity                                              |
| A08493 | Acute Toxicity                                              |
| A08494 | Multiple Dose Effects                                       |
| A08495 | Acute Toxicity                                              |
| A08496 | Mutagenicity, Tumorigenicity                                |
| A08497 | Mutagenicity, Tumorigenicity                                |
| A08498 | Acute Toxicity                                              |
| A08499 | Mutagenicity                                                |
| A08500 | Mutagenicity                                                |
| A08501 | Acute Toxicity, Multiple Dose Effects                       |
| A08502 | Non-toxicity                                                |
| A08503 | Acute Toxicity, Mutagenicity, Multiple Dose Effects         |
| A08504 | Mutagenicity                                                |
| A08505 | Acute Toxicity, Mutagenicity, Multiple Dose Effects         |
| A08506 | Reproductive Effects, Multiple Dose Effects                 |
| A08507 | Acute Toxicity, Multiple Dose Effects                       |
| A08508 | Mutagenicity                                                |
| A08509 | Mutagenicity                                                |
| A08510 | Mutagenicity                                                |
| A08511 | Acute Toxicity                                              |
| A08512 | Acute Toxicity                                              |
| A08513 | Acute Toxicity                                              |
| A08514 | Acute Toxicity, Reproductive Effects                        |
| A08515 | Acute Toxicity                                              |
| A08516 | Acute Toxicity, Reproductive Effects, Multiple Dose Effects |
| A08517 | Acute Toxicity, Multiple Dose Effects                       |
| A08518 | Acute Toxicity, Reproductive Effects, Multiple Dose Effects |
| A08519 | Acute Toxicity, Multiple Dose Effects                       |
| A08520 | Mutagenicity                                                |
| A08521 | Acute Toxicity, Reproductive Effects, Multiple Dose Effects |



|        |                                                             |
|--------|-------------------------------------------------------------|
| A08522 | Acute Toxicity, Multiple Dose Effects                       |
| A08523 | Mutagenicity                                                |
| A08524 | Acute Toxicity, Multiple Dose Effects                       |
| A08525 | Skin and Eye Irritation, Multiple Dose Effects              |
| A08526 | Acute Toxicity, Mutagenicity                                |
| A08527 | Acute Toxicity, Reproductive Effects, Multiple Dose Effects |
| A08528 | Acute Toxicity                                              |
| A08529 | Acute Toxicity, Mutagenicity, Skin and Eye Irritation       |
| A08530 | Acute Toxicity                                              |
| A08531 | Multiple Dose Effects                                       |
| A08532 | Acute Toxicity, Multiple Dose Effects                       |
| A08533 | Acute Toxicity                                              |
| A08534 | Acute Toxicity                                              |
| A08535 | Acute Toxicity                                              |
| A08536 | Acute Toxicity, Reproductive Effects, Multiple Dose Effects |
| A08537 | Acute Toxicity                                              |
| A08538 | Mutagenicity                                                |
| A08539 | Acute Toxicity, Multiple Dose Effects                       |
| A08540 | Non-toxicity                                                |
| A08541 | Acute Toxicity, Multiple Dose Effects                       |
| A08542 | Mutagenicity                                                |
| A08543 | Acute Toxicity, Mutagenicity, Multiple Dose Effects         |
| A08544 | Tumorigenicity                                              |
| A08545 | Multiple Dose Effects                                       |
| A08546 | Acute Toxicity                                              |
| A08547 | Acute Toxicity                                              |
| A08548 | Acute Toxicity, Mutagenicity                                |
| A08549 | Mutagenicity, Reproductive Effects, Multiple Dose Effects   |
| A08550 | Acute Toxicity, Multiple Dose Effects                       |
| A08551 | Acute Toxicity, Multiple Dose Effects                       |
| A08552 | Non-toxicity                                                |
| A08553 | Non-toxicity                                                |
| A08554 | Acute Toxicity                                              |
| A08555 | Acute Toxicity, Multiple Dose Effects                       |
| A08556 | Acute Toxicity, Multiple Dose Effects                       |
| A08557 | Non-toxicity                                                |
| A08558 | Acute Toxicity                                              |
| A08559 | Acute Toxicity                                              |
| A08560 | Multiple Dose Effects                                       |
| A08561 | Multiple Dose Effects                                       |
| A08562 | Acute Toxicity                                              |
| A08563 | Acute Toxicity                                              |
| A08564 | Non-toxicity                                                |
| A08565 | Non-toxicity                                                |
| A08566 | Mutagenicity, Multiple Dose Effects                         |
| A08567 | Acute Toxicity, Multiple Dose Effects                       |

|        |                                                                              |
|--------|------------------------------------------------------------------------------|
| A08568 | Multiple Dose Effects                                                        |
| A08569 | Acute Toxicity, Multiple Dose Effects                                        |
| A08570 | Multiple Dose Effects                                                        |
| A08571 | Acute Toxicity, Mutagenicity, Reproductive Effects, Multiple Dose Effects    |
| A08572 | Acute Toxicity, Multiple Dose Effects                                        |
| A08573 | Acute Toxicity, Mutagenicity, Tumorigenicity, Reproductive Effects,          |
| A08574 | Acute Toxicity                                                               |
| A08575 | Skin and Eye Irritation                                                      |
| A08576 | Acute Toxicity                                                               |
| A08577 | Acute Toxicity                                                               |
| A08578 | Acute Toxicity, Mutagenicity, Tumorigenicity                                 |
| A08579 | Acute Toxicity, Multiple Dose Effects                                        |
| A08580 | Acute Toxicity                                                               |
| A08581 | Acute Toxicity, Skin and Eye Irritation, Multiple Dose Effects               |
| A08582 | Acute Toxicity, Mutagenicity, Skin and Eye Irritation                        |
| A08583 | Acute Toxicity                                                               |
| A08584 | Acute Toxicity, Mutagenicity, Skin and Eye Irritation                        |
| A08585 | Acute Toxicity, Reproductive Effects, Multiple Dose Effects                  |
| A08586 | Acute Toxicity, Skin and Eye Irritation                                      |
| A08587 | Acute Toxicity, Skin and Eye Irritation, Reproductive Effects, Multiple Dose |
| A08588 | Acute Toxicity, Mutagenicity, Reproductive Effects                           |
| A08589 | Acute Toxicity                                                               |
| A08590 | Acute Toxicity                                                               |
| A08591 | Acute Toxicity                                                               |
| A08592 | Skin and Eye Irritation                                                      |
| A08593 | Acute Toxicity, Skin and Eye Irritation                                      |
| A08594 | Acute Toxicity                                                               |
| A08595 | Acute Toxicity                                                               |
| A08596 | Acute Toxicity, Multiple Dose Effects                                        |
| A08597 | Acute Toxicity, Skin and Eye Irritation                                      |
| A08598 | Acute Toxicity                                                               |
| A08599 | Acute Toxicity                                                               |
| A08600 | Acute Toxicity                                                               |
| A08601 | Acute Toxicity                                                               |
| A08602 | Acute Toxicity                                                               |
| A08603 | Acute Toxicity, Multiple Dose Effects                                        |
| A08604 | Acute Toxicity, Mutagenicity, Multiple Dose Effects                          |
| A08605 | Acute Toxicity                                                               |
| A08606 | Acute Toxicity                                                               |
| A08607 | Acute Toxicity, Mutagenicity                                                 |
| A08608 | Acute Toxicity, Multiple Dose Effects                                        |
| A08609 | Acute Toxicity                                                               |
| A08610 | Mutagenicity                                                                 |
| A08611 | Acute Toxicity                                                               |
| A08612 | Acute Toxicity                                                               |
| A08613 | Acute Toxicity                                                               |

|        |                                                                                                    |
|--------|----------------------------------------------------------------------------------------------------|
| A08614 | Acute Toxicity, Mutagenicity, Skin and Eye Irritation                                              |
| A08615 | Acute Toxicity, Skin and Eye Irritation                                                            |
| A08616 | Acute Toxicity                                                                                     |
| A08617 | Acute Toxicity                                                                                     |
| A08618 | Skin and Eye Irritation                                                                            |
| A08619 | Mutagenicity, Tumorigenicity                                                                       |
| A08620 | Acute Toxicity, Mutagenicity, Tumorigenicity                                                       |
| A08621 | Acute Toxicity                                                                                     |
| A08622 | Acute Toxicity, Skin and Eye Irritation                                                            |
| A08623 | Acute Toxicity                                                                                     |
| A08624 | Acute Toxicity, Skin and Eye Irritation                                                            |
| A08625 | Acute Toxicity                                                                                     |
| A08626 | Acute Toxicity                                                                                     |
| A08627 | Acute Toxicity, Mutagenicity, Skin and Eye Irritation, Reproductive Effects, Multiple Dose Effects |
| A08628 | Acute Toxicity, Mutagenicity, Skin and Eye Irritation                                              |
| A08629 | Acute Toxicity                                                                                     |
| A08630 | Acute Toxicity, Skin and Eye Irritation, Multiple Dose Effects                                     |
| A08631 | Skin and Eye Irritation                                                                            |
| A08632 | Acute Toxicity                                                                                     |
| A08633 | Acute Toxicity                                                                                     |
| A08634 | Acute Toxicity                                                                                     |
| A08635 | Acute Toxicity                                                                                     |
| A08636 | Acute Toxicity, Mutagenicity, Multiple Dose Effects                                                |
| A08637 | Acute Toxicity                                                                                     |
| A08638 | Acute Toxicity, Mutagenicity, Tumorigenicity, Skin and Eye Irritation                              |
| A08639 | Acute Toxicity                                                                                     |
| A08640 | Acute Toxicity                                                                                     |
| A08641 | Acute Toxicity, Tumorigenicity, Skin and Eye Irritation                                            |
| A08642 | Acute Toxicity, Skin and Eye Irritation                                                            |
| A08643 | Acute Toxicity, Multiple Dose Effects                                                              |
| A08644 | Acute Toxicity, Skin and Eye Irritation                                                            |
| A08645 | Acute Toxicity                                                                                     |
| A08646 | Acute Toxicity, Skin and Eye Irritation                                                            |
| A08647 | Mutagenicity                                                                                       |
| A08648 | Acute Toxicity, Skin and Eye Irritation                                                            |
| A08649 | Tumorigenicity                                                                                     |
| A08650 | Acute Toxicity, Multiple Dose Effects                                                              |
| A08651 | Acute Toxicity, Skin and Eye Irritation                                                            |
| A08652 | Acute Toxicity                                                                                     |
| A08653 | Acute Toxicity                                                                                     |
| A08654 | Skin and Eye Irritation                                                                            |
| A08655 | Acute Toxicity                                                                                     |
| A08656 | Acute Toxicity                                                                                     |
| A08657 | Acute Toxicity, Multiple Dose Effects                                                              |
| A08658 | Tumorigenicity, Multiple Dose Effects                                                              |

|        |                                                                              |
|--------|------------------------------------------------------------------------------|
| A08659 | Acute Toxicity                                                               |
| A08660 | Acute Toxicity, Skin and Eye Irritation, Reproductive Effects, Multiple Dose |
| A08661 | Acute Toxicity, Skin and Eye Irritation                                      |
| A08662 | Acute Toxicity                                                               |
| A08663 | Acute Toxicity, Reproductive Effects, Multiple Dose Effects                  |
| A08664 | Acute Toxicity                                                               |
| A08665 | Multiple Dose Effects                                                        |
| A08666 | Acute Toxicity                                                               |
| A08667 | Acute Toxicity, Skin and Eye Irritation, Reproductive Effects, Multiple Dose |
| A08668 | Mutagenicity, Tumorigenicity                                                 |
| A08669 | Acute Toxicity, Skin and Eye Irritation, Reproductive Effects, Multiple Dose |
| A08670 | Tumorigenicity                                                               |
| A08671 | Mutagenicity, Tumorigenicity                                                 |
| A08672 | Acute Toxicity, Skin and Eye Irritation                                      |
| A08673 | Acute Toxicity                                                               |
| A08674 | Acute Toxicity                                                               |
| A08675 | Mutagenicity, Tumorigenicity, Multiple Dose Effects                          |
| A08676 | Mutagenicity, Tumorigenicity                                                 |
| A08677 | Acute Toxicity, Mutagenicity                                                 |
| A08678 | Acute Toxicity, Multiple Dose Effects                                        |
| A08679 | Mutagenicity, Tumorigenicity                                                 |
| A08680 | Acute Toxicity, Skin and Eye Irritation                                      |
| A08681 | Mutagenicity, Tumorigenicity                                                 |
| A08682 | Acute Toxicity, Mutagenicity, Reproductive Effects                           |
| A08683 | Acute Toxicity, Mutagenicity                                                 |
| A08684 | Acute Toxicity                                                               |
| A08685 | Mutagenicity, Tumorigenicity                                                 |
| A08686 | Acute Toxicity, Mutagenicity, Tumorigenicity, Multiple Dose Effects          |
| A08687 | Acute Toxicity, Reproductive Effects, Multiple Dose Effects                  |
| A08688 | Acute Toxicity, Mutagenicity, Skin and Eye Irritation, Multiple Dose Effects |
| A08689 | Acute Toxicity                                                               |
| A08690 | Acute Toxicity, Tumorigenicity, Multiple Dose Effects                        |
| A08691 | Acute Toxicity, Skin and Eye Irritation                                      |
| A08692 | Acute Toxicity                                                               |
| A08693 | Acute Toxicity, Mutagenicity, Tumorigenicity, Skin and Eye Irritation,       |
| A08694 | Acute Toxicity, Skin and Eye Irritation                                      |
| A08695 | Acute Toxicity                                                               |
| A08696 | Acute Toxicity                                                               |
| A08697 | Acute Toxicity, Mutagenicity, Skin and Eye Irritation, Multiple Dose Effects |
| A08698 | Acute Toxicity, Mutagenicity, Tumorigenicity                                 |
| A08699 | Acute Toxicity, Mutagenicity, Multiple Dose Effects                          |
| A08700 | Acute Toxicity, Multiple Dose Effects                                        |
| A08701 | Non-toxicity                                                                 |
| A08702 | Acute Toxicity, Skin and Eye Irritation                                      |
| A08703 | Acute Toxicity, Mutagenicity, Tumorigenicity, Reproductive Effects,          |
| A08704 | Acute Toxicity, Skin and Eye Irritation                                      |

|        |                                                                              |
|--------|------------------------------------------------------------------------------|
| A08705 | Acute Toxicity, Skin and Eye Irritation                                      |
| A08706 | Acute Toxicity                                                               |
| A08707 | Acute Toxicity, Mutagenicity, Multiple Dose Effects                          |
| A08708 | Tumorigenicity                                                               |
| A08709 | Acute Toxicity, Tumorigenicity, Skin and Eye Irritation, Multiple Dose       |
| A08710 | Acute Toxicity, Mutagenicity, Skin and Eye Irritation, Multiple Dose Effects |
| A08711 | Tumorigenicity                                                               |
| A08712 | Skin and Eye Irritation                                                      |
| A08713 | Skin and Eye Irritation                                                      |
| A08714 | Acute Toxicity, Skin and Eye Irritation, Reproductive Effects, Multiple Dose |
| A08715 | Acute Toxicity, Skin and Eye Irritation                                      |
| A08716 | Mutagenicity                                                                 |
| A08717 | Mutagenicity, Skin and Eye Irritation                                        |
| A08718 | Mutagenicity                                                                 |
| A08719 | Acute Toxicity, Mutagenicity                                                 |
| A08720 | Mutagenicity, Tumorigenicity                                                 |
| A08721 | Acute Toxicity, Skin and Eye Irritation                                      |
| A08722 | Acute Toxicity                                                               |
| A08723 | Acute Toxicity                                                               |
| A08724 | Acute Toxicity                                                               |
| A08725 | Acute Toxicity, Multiple Dose Effects                                        |
| A08726 | Acute Toxicity                                                               |
| A08727 | Acute Toxicity                                                               |
| A08728 | Skin and Eye Irritation                                                      |
| A08729 | Mutagenicity                                                                 |
| A08730 | Acute Toxicity, Mutagenicity, Reproductive Effects, Multiple Dose Effects    |
| A08731 | Acute Toxicity, Multiple Dose Effects                                        |
| A08732 | Acute Toxicity, Reproductive Effects, Multiple Dose Effects                  |
| A08733 | Acute Toxicity, Mutagenicity                                                 |
| A08734 | Acute Toxicity                                                               |
| A08735 | Acute Toxicity                                                               |
| A08736 | Acute Toxicity                                                               |
| A08737 | Mutagenicity                                                                 |
| A08738 | Acute Toxicity                                                               |
| A08739 | Acute Toxicity, Skin and Eye Irritation                                      |
| A08740 | Acute Toxicity                                                               |
| A08741 | Acute Toxicity, Mutagenicity, Multiple Dose Effects                          |
| A08742 | Mutagenicity                                                                 |
| A08743 | Acute Toxicity                                                               |
| A08744 | Mutagenicity                                                                 |
| A08745 | Acute Toxicity                                                               |
| A08746 | Mutagenicity                                                                 |
| A08747 | Mutagenicity                                                                 |
| A08748 | Acute Toxicity                                                               |
| A08749 | Mutagenicity                                                                 |
| A08750 | Mutagenicity, Tumorigenicity                                                 |

|        |                                                                              |
|--------|------------------------------------------------------------------------------|
| A08751 | Acute Toxicity, Multiple Dose Effects                                        |
| A08752 | Acute Toxicity, Mutagenicity                                                 |
| A08753 | Mutagenicity, Tumorigenicity, Multiple Dose Effects                          |
| A08754 | Acute Toxicity, Skin and Eye Irritation, Multiple Dose Effects               |
| A08755 | Acute Toxicity, Multiple Dose Effects                                        |
| A08756 | Acute Toxicity, Reproductive Effects, Multiple Dose Effects                  |
| A08757 | Acute Toxicity, Skin and Eye Irritation                                      |
| A08758 | Acute Toxicity                                                               |
| A08759 | Acute Toxicity, Skin and Eye Irritation                                      |
| A08760 | Acute Toxicity, Skin and Eye Irritation                                      |
| A08761 | Multiple Dose Effects                                                        |
| A08762 | Acute Toxicity                                                               |
| A08763 | Multiple Dose Effects                                                        |
| A08764 | Tumorigenicity                                                               |
| A08765 | Acute Toxicity, Mutagenicity, Tumorigenicity, Reproductive Effects,          |
| A08766 | Acute Toxicity, Reproductive Effects, Multiple Dose Effects                  |
| A08767 | Acute Toxicity                                                               |
| A08768 | Acute Toxicity                                                               |
| A08769 | Non-toxicity                                                                 |
| A08770 | Skin and Eye Irritation                                                      |
| A08771 | Acute Toxicity                                                               |
| A08772 | Acute Toxicity, Tumorigenicity, Reproductive Effects, Multiple Dose Effects  |
| A08773 | Acute Toxicity, Reproductive Effects, Multiple Dose Effects                  |
| A08774 | Acute Toxicity, Multiple Dose Effects                                        |
| A08775 | Acute Toxicity, Skin and Eye Irritation, Reproductive Effects, Multiple Dose |
| A08776 | Mutagenicity, Tumorigenicity, Reproductive Effects                           |
| A08777 | Acute Toxicity, Tumorigenicity, Reproductive Effects, Multiple Dose Effects  |
| A08778 | Acute Toxicity                                                               |
| A08779 | Acute Toxicity                                                               |
| A08780 | Acute Toxicity, Reproductive Effects, Multiple Dose Effects                  |
| A08781 | Acute Toxicity, Skin and Eye Irritation                                      |
| A08782 | Acute Toxicity, Reproductive Effects, Multiple Dose Effects                  |
| A08783 | Acute Toxicity                                                               |
| A08784 | Acute Toxicity                                                               |
| A08785 | Acute Toxicity, Mutagenicity, Tumorigenicity, Reproductive Effects,          |
| A08786 | Mutagenicity, Multiple Dose Effects                                          |
| A08787 | Acute Toxicity                                                               |
| A08788 | Acute Toxicity                                                               |
| A08789 | Acute Toxicity                                                               |
| A08790 | Acute Toxicity                                                               |
| A08791 | Acute Toxicity                                                               |
| A08792 | Acute Toxicity                                                               |
| A08793 | Acute Toxicity                                                               |
| A08794 | Acute Toxicity                                                               |
| A08795 | Acute Toxicity                                                               |
| A08796 | Acute Toxicity                                                               |

|        |                                                                     |
|--------|---------------------------------------------------------------------|
| A08797 | Acute Toxicity                                                      |
| A08798 | Acute Toxicity                                                      |
| A08799 | Acute Toxicity                                                      |
| A08800 | Acute Toxicity                                                      |
| A08801 | Acute Toxicity                                                      |
| A08802 | Acute Toxicity                                                      |
| A08803 | Acute Toxicity                                                      |
| A08804 | Acute Toxicity                                                      |
| A08805 | Acute Toxicity                                                      |
| A08806 | Acute Toxicity                                                      |
| A08807 | Acute Toxicity                                                      |
| A08808 | Acute Toxicity                                                      |
| A08809 | Acute Toxicity                                                      |
| A08810 | Acute Toxicity, Reproductive Effects                                |
| A08811 | Acute Toxicity                                                      |
| A08812 | Acute Toxicity, Multiple Dose Effects                               |
| A08813 | Acute Toxicity, Tumorigenicity, Multiple Dose Effects               |
| A08814 | Non-toxicity                                                        |
| A08815 | Acute Toxicity                                                      |
| A08816 | Acute Toxicity                                                      |
| A08817 | Acute Toxicity, Multiple Dose Effects                               |
| A08818 | Acute Toxicity                                                      |
| A08819 | Mutagenicity                                                        |
| A08820 | Acute Toxicity, Skin and Eye Irritation, Multiple Dose Effects      |
| A08821 | Acute Toxicity, Tumorigenicity                                      |
| A08822 | Acute Toxicity                                                      |
| A08823 | Acute Toxicity                                                      |
| A08824 | Acute Toxicity, Mutagenicity                                        |
| A08825 | Acute Toxicity                                                      |
| A08826 | Acute Toxicity                                                      |
| A08827 | Acute Toxicity                                                      |
| A08828 | Acute Toxicity                                                      |
| A08829 | Acute Toxicity, Multiple Dose Effects                               |
| A08830 | Acute Toxicity                                                      |
| A08831 | Acute Toxicity, Mutagenicity                                        |
| A08832 | Acute Toxicity                                                      |
| A08833 | Acute Toxicity, Reproductive Effects, Multiple Dose Effects         |
| A08834 | Acute Toxicity, Tumorigenicity, Multiple Dose Effects               |
| A08835 | Acute Toxicity, Mutagenicity, Tumorigenicity, Reproductive Effects, |
| A08836 | Acute Toxicity                                                      |
| A08837 | Acute Toxicity                                                      |
| A08838 | Mutagenicity                                                        |
| A08839 | Mutagenicity                                                        |
| A08840 | Acute Toxicity, Tumorigenicity, Multiple Dose Effects               |
| A08841 | Acute Toxicity, Multiple Dose Effects                               |
| A08842 | Acute Toxicity, Multiple Dose Effects                               |

|        |                                                                              |
|--------|------------------------------------------------------------------------------|
| A08843 | Acute Toxicity                                                               |
| A08844 | Acute Toxicity, Multiple Dose Effects                                        |
| A08845 | Acute Toxicity                                                               |
| A08846 | Acute Toxicity                                                               |
| A08847 | Multiple Dose Effects                                                        |
| A08848 | Acute Toxicity                                                               |
| A08849 | Mutagenicity                                                                 |
| A08850 | Acute Toxicity, Mutagenicity, Multiple Dose Effects                          |
| A08851 | Acute Toxicity                                                               |
| A08852 | Mutagenicity                                                                 |
| A08853 | Acute Toxicity, Mutagenicity                                                 |
| A08854 | Mutagenicity                                                                 |
| A08855 | Mutagenicity                                                                 |
| A08856 | Acute Toxicity                                                               |
| A08857 | Skin and Eye Irritation, Multiple Dose Effects                               |
| A08858 | Mutagenicity                                                                 |
| A08859 | Acute Toxicity, Mutagenicity, Tumorigenicity, Skin and Eye Irritation,       |
| A08860 | Acute Toxicity, Multiple Dose Effects                                        |
| A08861 | Acute Toxicity, Mutagenicity                                                 |
| A08862 | Non-toxicity                                                                 |
| A08863 | Tumorigenicity                                                               |
| A08864 | Acute Toxicity                                                               |
| A08865 | Acute Toxicity, Multiple Dose Effects                                        |
| A08866 | Acute Toxicity                                                               |
| A08867 | Skin and Eye Irritation, Multiple Dose Effects                               |
| A08868 | Acute Toxicity, Tumorigenicity, Multiple Dose Effects                        |
| A08869 | Mutagenicity                                                                 |
| A08870 | Acute Toxicity                                                               |
| A08871 | Acute Toxicity, Multiple Dose Effects                                        |
| A08872 | Non-toxicity                                                                 |
| A08873 | Mutagenicity, Skin and Eye Irritation                                        |
| A08874 | Skin and Eye Irritation, Reproductive Effects, Multiple Dose Effects         |
| A08875 | Mutagenicity                                                                 |
| A08876 | Acute Toxicity                                                               |
| A08877 | Acute Toxicity                                                               |
| A08878 | Acute Toxicity, Mutagenicity                                                 |
| A08879 | Acute Toxicity, Mutagenicity, Skin and Eye Irritation, Multiple Dose Effects |
| A08880 | Acute Toxicity                                                               |
| A08881 | Mutagenicity, Tumorigenicity, Multiple Dose Effects                          |
| A08882 | Acute Toxicity                                                               |
| A08883 | Acute Toxicity, Mutagenicity                                                 |
| A08884 | Mutagenicity                                                                 |
| A08885 | Mutagenicity                                                                 |
| A08886 | Acute Toxicity                                                               |
| A08887 | Acute Toxicity                                                               |
| A08888 | Acute Toxicity                                                               |



|        |                                                                           |
|--------|---------------------------------------------------------------------------|
| A08889 | Acute Toxicity, Mutagenicity, Tumorigenicity, Reproductive Effects,       |
| A08890 | Acute Toxicity                                                            |
| A08891 | Acute Toxicity                                                            |
| A08892 | Acute Toxicity, Mutagenicity, Tumorigenicity, Reproductive Effects,       |
| A08893 | Acute Toxicity                                                            |
| A08894 | Acute Toxicity, Mutagenicity                                              |
| A08895 | Acute Toxicity                                                            |
| A08896 | Acute Toxicity                                                            |
| A08897 | Acute Toxicity                                                            |
| A08898 | Acute Toxicity, Mutagenicity, Skin and Eye Irritation                     |
| A08899 | Non-toxicity                                                              |
| A08900 | Acute Toxicity, Multiple Dose Effects                                     |
| A08901 | Acute Toxicity                                                            |
| A08902 | Acute Toxicity                                                            |
| A08903 | Acute Toxicity                                                            |
| A08904 | Acute Toxicity                                                            |
| A08905 | Mutagenicity                                                              |
| A08906 | Acute Toxicity                                                            |
| A08907 | Acute Toxicity                                                            |
| A08908 | Acute Toxicity, Skin and Eye Irritation                                   |
| A08909 | Multiple Dose Effects                                                     |
| A08910 | Skin and Eye Irritation, Multiple Dose Effects                            |
| A08911 | Acute Toxicity                                                            |
| A08912 | Acute Toxicity                                                            |
| A08913 | Acute Toxicity                                                            |
| A08914 | Acute Toxicity                                                            |
| A08915 | Acute Toxicity                                                            |
| A08916 | Acute Toxicity                                                            |
| A08917 | Mutagenicity                                                              |
| A08918 | Acute Toxicity, Multiple Dose Effects                                     |
| A08919 | Acute Toxicity, Multiple Dose Effects                                     |
| A08920 | Acute Toxicity                                                            |
| A08921 | Acute Toxicity                                                            |
| A08922 | Acute Toxicity                                                            |
| A08923 | Acute Toxicity, Multiple Dose Effects                                     |
| A08924 | Acute Toxicity                                                            |
| A08925 | Acute Toxicity, Mutagenicity, Reproductive Effects, Multiple Dose Effects |
| A08926 | Multiple Dose Effects                                                     |
| A08927 | Acute Toxicity, Skin and Eye Irritation                                   |
| A08928 | Acute Toxicity                                                            |
| A08929 | Acute Toxicity                                                            |
| A08930 | Acute Toxicity, Mutagenicity                                              |
| A08931 | Acute Toxicity                                                            |
| A08932 | Acute Toxicity                                                            |
| A08933 | Acute Toxicity                                                            |
| A08934 | Acute Toxicity, Mutagenicity                                              |

|        |                                                                              |
|--------|------------------------------------------------------------------------------|
| A08935 | Acute Toxicity                                                               |
| A08936 | Acute Toxicity                                                               |
| A08937 | Acute Toxicity, Reproductive Effects                                         |
| A08938 | Acute Toxicity                                                               |
| A08939 | Acute Toxicity                                                               |
| A08940 | Acute Toxicity                                                               |
| A08941 | Acute Toxicity, Tumorigenicity, Skin and Eye Irritation                      |
| A08942 | Acute Toxicity, Mutagenicity, Reproductive Effects, Multiple Dose Effects    |
| A08943 | Tumorigenicity                                                               |
| A08944 | Acute Toxicity, Mutagenicity                                                 |
| A08945 | Acute Toxicity                                                               |
| A08946 | Acute Toxicity, Multiple Dose Effects                                        |
| A08947 | Acute Toxicity, Skin and Eye Irritation                                      |
| A08948 | Mutagenicity                                                                 |
| A08949 | Acute Toxicity, Multiple Dose Effects                                        |
| A08950 | Acute Toxicity                                                               |
| A08951 | Mutagenicity                                                                 |
| A08952 | Acute Toxicity                                                               |
| A08953 | Acute Toxicity, Multiple Dose Effects                                        |
| A08954 | Acute Toxicity, Reproductive Effects                                         |
| A08955 | Acute Toxicity                                                               |
| A08956 | Multiple Dose Effects                                                        |
| A08957 | Non-toxicity                                                                 |
| A08958 | Acute Toxicity                                                               |
| A08959 | Acute Toxicity, Reproductive Effects                                         |
| A08960 | Acute Toxicity                                                               |
| A08961 | Mutagenicity, Reproductive Effects, Multiple Dose Effects                    |
| A08962 | Acute Toxicity, Mutagenicity                                                 |
| A08963 | Acute Toxicity                                                               |
| A08964 | Acute Toxicity, Multiple Dose Effects                                        |
| A08965 | Acute Toxicity, Mutagenicity                                                 |
| A08966 | Acute Toxicity                                                               |
| A08967 | Acute Toxicity                                                               |
| A08968 | Acute Toxicity                                                               |
| A08969 | Acute Toxicity                                                               |
| A08970 | Acute Toxicity                                                               |
| A08971 | Acute Toxicity, Multiple Dose Effects                                        |
| A08972 | Acute Toxicity                                                               |
| A08973 | Acute Toxicity                                                               |
| A08974 | Acute Toxicity                                                               |
| A08975 | Acute Toxicity, Skin and Eye Irritation, Reproductive Effects, Multiple Dose |
| A08976 | Acute Toxicity, Multiple Dose Effects                                        |
| A08977 | Acute Toxicity                                                               |
| A08978 | Acute Toxicity                                                               |
| A08979 | Acute Toxicity                                                               |
| A08980 | Acute Toxicity                                                               |

|        |                                                                           |
|--------|---------------------------------------------------------------------------|
| A08981 | Acute Toxicity, Mutagenicity, Multiple Dose Effects                       |
| A08982 | Acute Toxicity, Reproductive Effects                                      |
| A08983 | Acute Toxicity                                                            |
| A08984 | Acute Toxicity, Mutagenicity                                              |
| A08985 | Acute Toxicity, Multiple Dose Effects                                     |
| A08986 | Acute Toxicity, Mutagenicity, Reproductive Effects, Multiple Dose Effects |
| A08987 | Acute Toxicity, Multiple Dose Effects                                     |
| A08988 | Acute Toxicity                                                            |
| A08989 | Acute Toxicity                                                            |
| A08990 | Acute Toxicity                                                            |
| A08991 | Acute Toxicity                                                            |
| A08992 | Acute Toxicity                                                            |
| A08993 | Acute Toxicity, Reproductive Effects, Multiple Dose Effects               |
| A08994 | Acute Toxicity, Mutagenicity, Multiple Dose Effects                       |
| A08995 | Acute Toxicity, Mutagenicity, Multiple Dose Effects                       |
| A08996 | Acute Toxicity, Mutagenicity, Reproductive Effects, Multiple Dose Effects |
| A08997 | Multiple Dose Effects                                                     |
| A08998 | Acute Toxicity, Mutagenicity, Reproductive Effects, Multiple Dose Effects |
| A08999 | Acute Toxicity                                                            |
| A09000 | Acute Toxicity, Mutagenicity, Reproductive Effects, Multiple Dose Effects |
| A09001 | Acute Toxicity, Reproductive Effects, Multiple Dose Effects               |
| A09002 | Acute Toxicity                                                            |
| A09003 | Acute Toxicity, Multiple Dose Effects                                     |
| A09004 | Acute Toxicity                                                            |
| A09005 | Acute Toxicity                                                            |
| A09006 | Acute Toxicity                                                            |
| A09007 | Acute Toxicity, Reproductive Effects, Multiple Dose Effects               |
| A09008 | Acute Toxicity                                                            |
| A09009 | Acute Toxicity, Reproductive Effects                                      |
| A09010 | Acute Toxicity, Multiple Dose Effects                                     |
| A09011 | Acute Toxicity, Mutagenicity, Skin and Eye Irritation                     |
| A09012 | Multiple Dose Effects                                                     |
| A09013 | Acute Toxicity, Skin and Eye Irritation, Multiple Dose Effects            |
| A09014 | Acute Toxicity                                                            |
| A09015 | Acute Toxicity                                                            |
| A09016 | Acute Toxicity                                                            |
| A09017 | Acute Toxicity                                                            |
| A09018 | Acute Toxicity                                                            |
| A09019 | Acute Toxicity, Skin and Eye Irritation                                   |
| A09020 | Acute Toxicity, Multiple Dose Effects                                     |
| A09021 | Acute Toxicity                                                            |
| A09022 | Multiple Dose Effects                                                     |
| A09023 | Acute Toxicity, Reproductive Effects, Multiple Dose Effects               |
| A09024 | Acute Toxicity                                                            |
| A09025 | Mutagenicity                                                              |
| A09026 | Acute Toxicity, Skin and Eye Irritation                                   |

|        |                                                             |
|--------|-------------------------------------------------------------|
| A09027 | Acute Toxicity                                              |
| A09028 | Tumorigenicity                                              |
| A09029 | Acute Toxicity                                              |
| A09030 | Tumorigenicity                                              |
| A09031 | Acute Toxicity                                              |
| A09032 | Acute Toxicity                                              |
| A09033 | Acute Toxicity                                              |
| A09034 | Acute Toxicity                                              |
| A09035 | Acute Toxicity                                              |
| A09036 | Multiple Dose Effects                                       |
| A09037 | Acute Toxicity                                              |
| A09038 | Mutagenicity                                                |
| A09039 | Acute Toxicity                                              |
| A09040 | Acute Toxicity                                              |
| A09041 | Multiple Dose Effects                                       |
| A09042 | Acute Toxicity                                              |
| A09043 | Reproductive Effects                                        |
| A09044 | Acute Toxicity, Multiple Dose Effects                       |
| A09045 | Acute Toxicity                                              |
| A09046 | Tumorigenicity, Multiple Dose Effects                       |
| A09047 | Mutagenicity                                                |
| A09048 | Mutagenicity                                                |
| A09049 | Acute Toxicity                                              |
| A09050 | Reproductive Effects                                        |
| A09051 | Acute Toxicity, Mutagenicity                                |
| A09052 | Mutagenicity                                                |
| A09053 | Tumorigenicity, Reproductive Effects                        |
| A09054 | Mutagenicity, Multiple Dose Effects                         |
| A09055 | Reproductive Effects                                        |
| A09056 | Mutagenicity, Tumorigenicity, Reproductive Effects          |
| A09057 | Acute Toxicity                                              |
| A09058 | Mutagenicity                                                |
| A09059 | Acute Toxicity, Reproductive Effects, Multiple Dose Effects |
| A09060 | Reproductive Effects                                        |
| A09061 | Acute Toxicity                                              |
| A09062 | Acute Toxicity                                              |
| A09063 | Multiple Dose Effects                                       |
| A09064 | Acute Toxicity, Multiple Dose Effects                       |
| A09065 | Mutagenicity                                                |
| A09066 | Acute Toxicity                                              |
| A09067 | Acute Toxicity                                              |
| A09068 | Mutagenicity                                                |
| A09069 | Acute Toxicity                                              |
| A09070 | Acute Toxicity                                              |
| A09071 | Mutagenicity                                                |
| A09072 | Acute Toxicity, Mutagenicity, Multiple Dose Effects         |

|        |                                                                |
|--------|----------------------------------------------------------------|
| A09073 | Acute Toxicity                                                 |
| A09074 | Mutagenicity                                                   |
| A09075 | Mutagenicity                                                   |
| A09076 | Acute Toxicity                                                 |
| A09077 | Acute Toxicity                                                 |
| A09078 | Acute Toxicity, Mutagenicity                                   |
| A09079 | Acute Toxicity                                                 |
| A09080 | Mutagenicity                                                   |
| A09081 | Mutagenicity                                                   |
| A09082 | Acute Toxicity                                                 |
| A09083 | Acute Toxicity                                                 |
| A09084 | Acute Toxicity, Skin and Eye Irritation, Multiple Dose Effects |
| A09085 | Acute Toxicity, Reproductive Effects                           |
| A09086 | Acute Toxicity                                                 |
| A09087 | Acute Toxicity                                                 |
| A09088 | Skin and Eye Irritation                                        |
| A09089 | Acute Toxicity, Skin and Eye Irritation                        |
| A09090 | Acute Toxicity                                                 |
| A09091 | Acute Toxicity                                                 |
| A09092 | Acute Toxicity                                                 |
| A09093 | Acute Toxicity                                                 |
| A09094 | Acute Toxicity                                                 |
| A09095 | Acute Toxicity                                                 |
| A09096 | Acute Toxicity                                                 |
| A09097 | Skin and Eye Irritation                                        |
| A09098 | Acute Toxicity                                                 |
| A09099 | Acute Toxicity                                                 |
| A09100 | Acute Toxicity                                                 |
| A09101 | Acute Toxicity, Skin and Eye Irritation                        |
| A09102 | Acute Toxicity                                                 |
| A09103 | Mutagenicity                                                   |
| A09104 | Acute Toxicity                                                 |
| A09105 | Acute Toxicity                                                 |
| A09106 | Acute Toxicity                                                 |
| A09107 | Acute Toxicity, Mutagenicity, Skin and Eye Irritation          |
| A09108 | Acute Toxicity                                                 |
| A09109 | Acute Toxicity                                                 |
| A09110 | Acute Toxicity                                                 |
| A09111 | Skin and Eye Irritation                                        |
| A09112 | Acute Toxicity                                                 |
| A09113 | Mutagenicity                                                   |
| A09114 | Acute Toxicity                                                 |
| A09115 | Acute Toxicity, Multiple Dose Effects                          |
| A09116 | Acute Toxicity                                                 |
| A09117 | Acute Toxicity, Mutagenicity, Skin and Eye Irritation          |
| A09118 | Mutagenicity                                                   |

|        |                                                                              |
|--------|------------------------------------------------------------------------------|
| A09119 | Acute Toxicity, Skin and Eye Irritation                                      |
| A09120 | Acute Toxicity, Skin and Eye Irritation                                      |
| A09121 | Acute Toxicity                                                               |
| A09122 | Mutagenicity                                                                 |
| A09123 | Acute Toxicity, Mutagenicity, Tumorigenicity                                 |
| A09124 | Mutagenicity                                                                 |
| A09125 | Tumorigenicity                                                               |
| A09126 | Mutagenicity, Tumorigenicity, Multiple Dose Effects                          |
| A09127 | Acute Toxicity, Multiple Dose Effects                                        |
| A09128 | Acute Toxicity                                                               |
| A09129 | Acute Toxicity                                                               |
| A09130 | Acute Toxicity, Mutagenicity, Skin and Eye Irritation, Multiple Dose Effects |
| A09131 | Multiple Dose Effects                                                        |
| A09132 | Mutagenicity                                                                 |
| A09133 | Acute Toxicity                                                               |
| A09134 | Acute Toxicity, Mutagenicity, Skin and Eye Irritation                        |
| A09135 | Acute Toxicity                                                               |
| A09136 | Acute Toxicity                                                               |
| A09137 | Acute Toxicity                                                               |
| A09138 | Mutagenicity                                                                 |
| A09139 | Mutagenicity                                                                 |
| A09140 | Mutagenicity, Tumorigenicity                                                 |
| A09141 | Mutagenicity                                                                 |
| A09142 | Mutagenicity                                                                 |
| A09143 | Mutagenicity                                                                 |
| A09144 | Acute Toxicity                                                               |
| A09145 | Acute Toxicity                                                               |
| A09146 | Acute Toxicity                                                               |
| A09147 | Mutagenicity                                                                 |
| A09148 | Acute Toxicity                                                               |
| A09149 | Acute Toxicity                                                               |
| A09150 | Acute Toxicity                                                               |
| A09151 | Multiple Dose Effects                                                        |
| A09152 | Reproductive Effects, Multiple Dose Effects                                  |
| A09153 | Acute Toxicity                                                               |
| A09154 | Tumorigenicity                                                               |
| A09155 | Multiple Dose Effects                                                        |
| A09156 | Mutagenicity                                                                 |
| A09157 | Mutagenicity                                                                 |
| A09158 | Acute Toxicity                                                               |
| A09159 | Skin and Eye Irritation                                                      |
| A09160 | Acute Toxicity                                                               |
| A09161 | Acute Toxicity                                                               |
| A09162 | Acute Toxicity, Tumorigenicity, Multiple Dose Effects                        |
| A09163 | Mutagenicity                                                                 |
| A09164 | Acute Toxicity, Multiple Dose Effects                                        |

|        |                                                                     |
|--------|---------------------------------------------------------------------|
| A09165 | Mutagenicity                                                        |
| A09166 | Acute Toxicity                                                      |
| A09167 | Acute Toxicity, Mutagenicity                                        |
| A09168 | Acute Toxicity, Tumorigenicity, Reproductive Effects                |
| A09169 | Acute Toxicity                                                      |
| A09170 | Mutagenicity                                                        |
| A09171 | Acute Toxicity                                                      |
| A09172 | Acute Toxicity                                                      |
| A09173 | Acute Toxicity                                                      |
| A09174 | Reproductive Effects, Multiple Dose Effects                         |
| A09175 | Acute Toxicity                                                      |
| A09176 | Acute Toxicity                                                      |
| A09177 | Mutagenicity                                                        |
| A09178 | Acute Toxicity                                                      |
| A09179 | Acute Toxicity                                                      |
| A09180 | Acute Toxicity, Mutagenicity                                        |
| A09181 | Acute Toxicity                                                      |
| A09182 | Non-toxicity                                                        |
| A09183 | Acute Toxicity                                                      |
| A09184 | Acute Toxicity, Mutagenicity                                        |
| A09185 | Acute Toxicity                                                      |
| A09186 | Mutagenicity                                                        |
| A09187 | Acute Toxicity                                                      |
| A09188 | Acute Toxicity                                                      |
| A09189 | Acute Toxicity                                                      |
| A09190 | Mutagenicity                                                        |
| A09191 | Acute Toxicity                                                      |
| A09192 | Acute Toxicity, Multiple Dose Effects                               |
| A09193 | Acute Toxicity, Mutagenicity                                        |
| A09194 | Acute Toxicity                                                      |
| A09195 | Acute Toxicity, Mutagenicity, Tumorigenicity                        |
| A09196 | Acute Toxicity, Mutagenicity                                        |
| A09197 | Acute Toxicity                                                      |
| A09198 | Mutagenicity                                                        |
| A09199 | Acute Toxicity, Skin and Eye Irritation                             |
| A09200 | Mutagenicity                                                        |
| A09201 | Acute Toxicity, Multiple Dose Effects                               |
| A09202 | Acute Toxicity, Multiple Dose Effects                               |
| A09203 | Acute Toxicity                                                      |
| A09204 | Acute Toxicity, Multiple Dose Effects                               |
| A09205 | Acute Toxicity, Mutagenicity, Tumorigenicity, Multiple Dose Effects |
| A09206 | Mutagenicity                                                        |
| A09207 | Acute Toxicity                                                      |
| A09208 | Acute Toxicity                                                      |
| A09209 | Acute Toxicity                                                      |
| A09210 | Acute Toxicity, Mutagenicity                                        |

|        |                                                                       |
|--------|-----------------------------------------------------------------------|
| A09211 | Acute Toxicity                                                        |
| A09212 | Acute Toxicity                                                        |
| A09213 | Acute Toxicity, Skin and Eye Irritation                               |
| A09214 | Acute Toxicity                                                        |
| A09215 | Tumorigenicity                                                        |
| A09216 | Acute Toxicity, Mutagenicity                                          |
| A09217 | Non-toxicity                                                          |
| A09218 | Non-toxicity                                                          |
| A09219 | Mutagenicity                                                          |
| A09220 | Non-toxicity                                                          |
| A09221 | Acute Toxicity, Skin and Eye Irritation                               |
| A09222 | Acute Toxicity, Multiple Dose Effects                                 |
| A09223 | Acute Toxicity                                                        |
| A09224 | Acute Toxicity                                                        |
| A09225 | Acute Toxicity                                                        |
| A09226 | Acute Toxicity                                                        |
| A09227 | Acute Toxicity, Multiple Dose Effects                                 |
| A09228 | Acute Toxicity, Multiple Dose Effects                                 |
| A09229 | Acute Toxicity, Mutagenicity                                          |
| A09230 | Mutagenicity                                                          |
| A09231 | Mutagenicity                                                          |
| A09232 | Acute Toxicity                                                        |
| A09233 | Acute Toxicity                                                        |
| A09234 | Mutagenicity                                                          |
| A09235 | Mutagenicity                                                          |
| A09236 | Mutagenicity                                                          |
| A09237 | Acute Toxicity                                                        |
| A09238 | Acute Toxicity, Mutagenicity, Multiple Dose Effects                   |
| A09239 | Acute Toxicity, Mutagenicity                                          |
| A09240 | Mutagenicity                                                          |
| A09241 | Mutagenicity, Skin and Eye Irritation                                 |
| A09242 | Mutagenicity                                                          |
| A09243 | Acute Toxicity, Mutagenicity                                          |
| A09244 | Acute Toxicity, Mutagenicity                                          |
| A09245 | Acute Toxicity, Mutagenicity, Tumorigenicity, Skin and Eye Irritation |
| A09246 | Multiple Dose Effects                                                 |
| A09247 | Non-toxicity                                                          |
| A09248 | Non-toxicity                                                          |
| A09249 | Mutagenicity, Skin and Eye Irritation                                 |
| A09250 | Mutagenicity                                                          |
| A09251 | Non-toxicity                                                          |
| A09252 | Acute Toxicity                                                        |
| A09253 | Non-toxicity                                                          |
| A09254 | Skin and Eye Irritation                                               |
| A09255 | Tumorigenicity, Skin and Eye Irritation                               |
| A09256 | Acute Toxicity, Mutagenicity                                          |



|        |                                                                     |
|--------|---------------------------------------------------------------------|
| A09257 | Acute Toxicity, Mutagenicity                                        |
| A09258 | Acute Toxicity, Tumorigenicity                                      |
| A09259 | Acute Toxicity                                                      |
| A09260 | Acute Toxicity                                                      |
| A09261 | Acute Toxicity                                                      |
| A09262 | Acute Toxicity, Mutagenicity                                        |
| A09263 | Acute Toxicity                                                      |
| A09264 | Acute Toxicity                                                      |
| A09265 | Acute Toxicity                                                      |
| A09266 | Mutagenicity                                                        |
| A09267 | Mutagenicity                                                        |
| A09268 | Skin and Eye Irritation                                             |
| A09269 | Mutagenicity                                                        |
| A09270 | Mutagenicity                                                        |
| A09271 | Mutagenicity                                                        |
| A09272 | Reproductive Effects                                                |
| A09273 | Acute Toxicity                                                      |
| A09274 | Mutagenicity                                                        |
| A09275 | Mutagenicity                                                        |
| A09276 | Mutagenicity                                                        |
| A09277 | Acute Toxicity, Mutagenicity, Tumorigenicity, Multiple Dose Effects |
| A09278 | Acute Toxicity                                                      |
| A09279 | Reproductive Effects                                                |
| A09280 | Acute Toxicity                                                      |
| A09281 | Acute Toxicity                                                      |
| A09282 | Acute Toxicity                                                      |
| A09283 | Acute Toxicity, Mutagenicity                                        |
| A09284 | Acute Toxicity                                                      |
| A09285 | Acute Toxicity                                                      |
| A09286 | Acute Toxicity, Reproductive Effects, Multiple Dose Effects         |
| A09287 | Acute Toxicity, Multiple Dose Effects                               |
| A09288 | Non-toxicity                                                        |
| A09289 | Acute Toxicity                                                      |
| A09290 | Acute Toxicity, Skin and Eye Irritation                             |
| A09291 | Acute Toxicity                                                      |
| A09292 | Acute Toxicity, Mutagenicity, Multiple Dose Effects                 |
| A09293 | Acute Toxicity                                                      |
| A09294 | Acute Toxicity                                                      |
| A09295 | Reproductive Effects                                                |
| A09296 | Acute Toxicity                                                      |
| A09297 | Acute Toxicity                                                      |
| A09298 | Acute Toxicity, Multiple Dose Effects                               |
| A09299 | Mutagenicity, Tumorigenicity, Multiple Dose Effects                 |
| A09300 | Acute Toxicity, Reproductive Effects, Multiple Dose Effects         |
| A09301 | Acute Toxicity                                                      |
| A09302 | Acute Toxicity, Mutagenicity                                        |

|        |                                                                           |
|--------|---------------------------------------------------------------------------|
| A09303 | Acute Toxicity                                                            |
| A09304 | Acute Toxicity, Multiple Dose Effects                                     |
| A09305 | Acute Toxicity, Skin and Eye Irritation, Multiple Dose Effects            |
| A09306 | Acute Toxicity                                                            |
| A09307 | Acute Toxicity                                                            |
| A09308 | Acute Toxicity                                                            |
| A09309 | Multiple Dose Effects                                                     |
| A09310 | Skin and Eye Irritation                                                   |
| A09311 | Acute Toxicity, Mutagenicity, Tumorigenicity                              |
| A09312 | Acute Toxicity                                                            |
| A09313 | Acute Toxicity                                                            |
| A09314 | Acute Toxicity, Skin and Eye Irritation                                   |
| A09315 | Acute Toxicity, Reproductive Effects, Multiple Dose Effects               |
| A09316 | Acute Toxicity, Reproductive Effects, Multiple Dose Effects               |
| A09317 | Acute Toxicity, Reproductive Effects                                      |
| A09318 | Acute Toxicity                                                            |
| A09319 | Acute Toxicity                                                            |
| A09320 | Acute Toxicity                                                            |
| A09321 | Acute Toxicity                                                            |
| A09322 | Acute Toxicity                                                            |
| A09323 | Acute Toxicity, Mutagenicity, Tumorigenicity, Multiple Dose Effects       |
| A09324 | Acute Toxicity, Mutagenicity                                              |
| A09325 | Acute Toxicity                                                            |
| A09326 | Acute Toxicity, Mutagenicity, Reproductive Effects, Multiple Dose Effects |
| A09327 | Acute Toxicity                                                            |
| A09328 | Skin and Eye Irritation                                                   |
| A09329 | Acute Toxicity, Reproductive Effects                                      |
| A09330 | Non-toxicity                                                              |
| A09331 | Acute Toxicity, Skin and Eye Irritation                                   |
| A09332 | Acute Toxicity, Reproductive Effects, Multiple Dose Effects               |
| A09333 | Mutagenicity, Reproductive Effects                                        |
| A09334 | Acute Toxicity, Multiple Dose Effects                                     |
| A09335 | Acute Toxicity                                                            |
| A09336 | Acute Toxicity                                                            |
| A09337 | Acute Toxicity                                                            |
| A09338 | Acute Toxicity                                                            |
| A09339 | Acute Toxicity, Multiple Dose Effects                                     |
| A09340 | Non-toxicity                                                              |
| A09341 | Acute Toxicity                                                            |
| A09342 | Acute Toxicity                                                            |
| A09343 | Acute Toxicity                                                            |
| A09344 | Skin and Eye Irritation                                                   |
| A09345 | Acute Toxicity                                                            |
| A09346 | Acute Toxicity                                                            |
| A09347 | Acute Toxicity                                                            |
| A09348 | Acute Toxicity, Multiple Dose Effects                                     |

|        |                                                     |
|--------|-----------------------------------------------------|
| A09349 | Acute Toxicity                                      |
| A09350 | Acute Toxicity, Mutagenicity                        |
| A09351 | Acute Toxicity                                      |
| A09352 | Acute Toxicity                                      |
| A09353 | Acute Toxicity                                      |
| A09354 | Mutagenicity                                        |
| A09355 | Acute Toxicity                                      |
| A09356 | Acute Toxicity, Mutagenicity                        |
| A09357 | Acute Toxicity                                      |
| A09358 | Acute Toxicity                                      |
| A09359 | Acute Toxicity, Mutagenicity                        |
| A09360 | Acute Toxicity, Skin and Eye Irritation             |
| A09361 | Acute Toxicity                                      |
| A09362 | Acute Toxicity                                      |
| A09363 | Mutagenicity                                        |
| A09364 | Acute Toxicity, Mutagenicity                        |
| A09365 | Mutagenicity                                        |
| A09366 | Acute Toxicity                                      |
| A09367 | Acute Toxicity, Multiple Dose Effects               |
| A09368 | Mutagenicity                                        |
| A09369 | Acute Toxicity                                      |
| A09370 | Acute Toxicity, Skin and Eye Irritation             |
| A09371 | Mutagenicity                                        |
| A09372 | Mutagenicity                                        |
| A09373 | Acute Toxicity                                      |
| A09374 | Acute Toxicity                                      |
| A09375 | Acute Toxicity, Mutagenicity, Multiple Dose Effects |
| A09376 | Mutagenicity                                        |
| A09377 | Non-toxicity                                        |
| A09378 | Mutagenicity                                        |
| A09379 | Acute Toxicity                                      |
| A09380 | Mutagenicity, Tumorigenicity                        |
| A09381 | Acute Toxicity                                      |
| A09382 | Mutagenicity                                        |
| A09383 | Non-toxicity                                        |
| A09384 | Mutagenicity                                        |
| A09385 | Acute Toxicity                                      |
| A09386 | Tumorigenicity                                      |
| A09387 | Acute Toxicity                                      |
| A09388 | Mutagenicity                                        |
| A09389 | Acute Toxicity                                      |
| A09390 | Mutagenicity, Skin and Eye Irritation               |
| A09391 | Acute Toxicity                                      |
| A09392 | Acute Toxicity                                      |
| A09393 | Acute Toxicity, Multiple Dose Effects               |
| A09394 | Acute Toxicity                                      |

|        |                                                                              |
|--------|------------------------------------------------------------------------------|
| A09395 | Acute Toxicity                                                               |
| A09396 | Mutagenicity                                                                 |
| A09397 | Multiple Dose Effects                                                        |
| A09398 | Mutagenicity                                                                 |
| A09399 | Mutagenicity                                                                 |
| A09400 | Acute Toxicity                                                               |
| A09401 | Non-toxicity                                                                 |
| A09402 | Acute Toxicity                                                               |
| A09403 | Mutagenicity                                                                 |
| A09404 | Acute Toxicity                                                               |
| A09405 | Acute Toxicity                                                               |
| A09406 | Acute Toxicity                                                               |
| A09407 | Acute Toxicity                                                               |
| A09408 | Acute Toxicity                                                               |
| A09409 | Acute Toxicity                                                               |
| A09410 | Multiple Dose Effects                                                        |
| A09411 | Non-toxicity                                                                 |
| A09412 | Acute Toxicity                                                               |
| A09413 | Acute Toxicity                                                               |
| A09414 | Mutagenicity                                                                 |
| A09415 | Acute Toxicity                                                               |
| A09416 | Acute Toxicity                                                               |
| A09417 | Acute Toxicity                                                               |
| A09418 | Non-toxicity                                                                 |
| A09419 | Acute Toxicity, Mutagenicity, Multiple Dose Effects                          |
| A09420 | Acute Toxicity                                                               |
| A09421 | Mutagenicity                                                                 |
| A09422 | Acute Toxicity, Reproductive Effects                                         |
| A09423 | Non-toxicity                                                                 |
| A09424 | Acute Toxicity                                                               |
| A09425 | Acute Toxicity                                                               |
| A09426 | Acute Toxicity, Multiple Dose Effects                                        |
| A09427 | Acute Toxicity                                                               |
| A09428 | Acute Toxicity                                                               |
| A09429 | Acute Toxicity, Reproductive Effects                                         |
| A09430 | Acute Toxicity                                                               |
| A09431 | Acute Toxicity                                                               |
| A09432 | Acute Toxicity                                                               |
| A09433 | Mutagenicity                                                                 |
| A09434 | Acute Toxicity                                                               |
| A09435 | Acute Toxicity, Reproductive Effects, Multiple Dose Effects                  |
| A09436 | Acute Toxicity                                                               |
| A09437 | Acute Toxicity                                                               |
| A09438 | Acute Toxicity, Skin and Eye Irritation, Reproductive Effects, Multiple Dose |
| A09439 | Acute Toxicity                                                               |
| A09440 | Mutagenicity                                                                 |

|        |                                                                |
|--------|----------------------------------------------------------------|
| A09441 | Mutagenicity                                                   |
| A09442 | Mutagenicity                                                   |
| A09443 | Acute Toxicity, Mutagenicity, Skin and Eye Irritation          |
| A09444 | Acute Toxicity                                                 |
| A09445 | Acute Toxicity                                                 |
| A09446 | Acute Toxicity                                                 |
| A09447 | Acute Toxicity                                                 |
| A09448 | Mutagenicity                                                   |
| A09449 | Acute Toxicity                                                 |
| A09450 | Mutagenicity                                                   |
| A09451 | Non-toxicity                                                   |
| A09452 | Mutagenicity                                                   |
| A09453 | Mutagenicity                                                   |
| A09454 | Acute Toxicity, Mutagenicity                                   |
| A09455 | Acute Toxicity                                                 |
| A09456 | Mutagenicity, Tumorigenicity                                   |
| A09457 | Skin and Eye Irritation, Multiple Dose Effects                 |
| A09458 | Acute Toxicity, Multiple Dose Effects                          |
| A09459 | Acute Toxicity                                                 |
| A09460 | Mutagenicity                                                   |
| A09461 | Acute Toxicity                                                 |
| A09462 | Acute Toxicity                                                 |
| A09463 | Acute Toxicity, Skin and Eye Irritation, Multiple Dose Effects |
| A09464 | Acute Toxicity                                                 |
| A09465 | Acute Toxicity                                                 |
| A09466 | Mutagenicity                                                   |
| A09467 | Tumorigenicity                                                 |
| A09468 | Acute Toxicity, Mutagenicity                                   |
| A09469 | Acute Toxicity                                                 |
| A09470 | Mutagenicity                                                   |
| A09471 | Acute Toxicity                                                 |
| A09472 | Acute Toxicity                                                 |
| A09473 | Mutagenicity                                                   |
| A09474 | Tumorigenicity                                                 |
| A09475 | Acute Toxicity                                                 |
| A09476 | Mutagenicity, Tumorigenicity                                   |
| A09477 | Mutagenicity, Tumorigenicity                                   |
| A09478 | Mutagenicity                                                   |
| A09479 | Mutagenicity                                                   |
| A09480 | Mutagenicity                                                   |
| A09481 | Mutagenicity                                                   |
| A09482 | Mutagenicity                                                   |
| A09483 | Acute Toxicity, Mutagenicity                                   |
| A09484 | Acute Toxicity                                                 |
| A09485 | Acute Toxicity, Skin and Eye Irritation                        |
| A09486 | Acute Toxicity                                                 |

|        |                                                       |
|--------|-------------------------------------------------------|
| A09487 | Acute Toxicity                                        |
| A09488 | Non-toxicity                                          |
| A09489 | Acute Toxicity                                        |
| A09490 | Mutagenicity                                          |
| A09491 | Non-toxicity                                          |
| A09492 | Mutagenicity                                          |
| A09493 | Acute Toxicity                                        |
| A09494 | Acute Toxicity                                        |
| A09495 | Acute Toxicity                                        |
| A09496 | Acute Toxicity                                        |
| A09497 | Acute Toxicity, Mutagenicity, Reproductive Effects    |
| A09498 | Mutagenicity                                          |
| A09499 | Acute Toxicity, Mutagenicity, Multiple Dose Effects   |
| A09500 | Acute Toxicity, Skin and Eye Irritation               |
| A09501 | Acute Toxicity                                        |
| A09502 | Acute Toxicity                                        |
| A09503 | Acute Toxicity                                        |
| A09504 | Acute Toxicity                                        |
| A09505 | Acute Toxicity                                        |
| A09506 | Acute Toxicity, Mutagenicity                          |
| A09507 | Mutagenicity                                          |
| A09508 | Acute Toxicity                                        |
| A09509 | Tumorigenicity                                        |
| A09510 | Acute Toxicity                                        |
| A09511 | Non-toxicity                                          |
| A09512 | Non-toxicity                                          |
| A09513 | Tumorigenicity                                        |
| A09514 | Acute Toxicity                                        |
| A09515 | Acute Toxicity                                        |
| A09516 | Skin and Eye Irritation                               |
| A09517 | Acute Toxicity                                        |
| A09518 | Mutagenicity                                          |
| A09519 | Acute Toxicity, Mutagenicity, Skin and Eye Irritation |
| A09520 | Acute Toxicity                                        |
| A09521 | Acute Toxicity                                        |
| A09522 | Acute Toxicity                                        |
| A09523 | Acute Toxicity                                        |
| A09524 | Mutagenicity                                          |
| A09525 | Tumorigenicity, Skin and Eye Irritation               |
| A09526 | Acute Toxicity                                        |
| A09527 | Acute Toxicity, Mutagenicity                          |
| A09528 | Acute Toxicity, Mutagenicity, Multiple Dose Effects   |
| A09529 | Acute Toxicity                                        |
| A09530 | Acute Toxicity                                        |
| A09531 | Acute Toxicity                                        |
| A09532 | Acute Toxicity                                        |

|        |                                                             |
|--------|-------------------------------------------------------------|
| A09533 | Mutagenicity                                                |
| A09534 | Mutagenicity                                                |
| A09535 | Acute Toxicity, Mutagenicity, Skin and Eye Irritation       |
| A09536 | Non-toxicity                                                |
| A09537 | Non-toxicity                                                |
| A09538 | Acute Toxicity, Tumorigenicity, Multiple Dose Effects       |
| A09539 | Tumorigenicity                                              |
| A09540 | Acute Toxicity                                              |
| A09541 | Acute Toxicity                                              |
| A09542 | Acute Toxicity                                              |
| A09543 | Mutagenicity                                                |
| A09544 | Acute Toxicity                                              |
| A09545 | Acute Toxicity, Reproductive Effects, Multiple Dose Effects |
| A09546 | Acute Toxicity                                              |
| A09547 | Acute Toxicity                                              |
| A09548 | Acute Toxicity                                              |
| A09549 | Acute Toxicity                                              |
| A09550 | Mutagenicity                                                |
| A09551 | Non-toxicity                                                |
| A09552 | Mutagenicity                                                |
| A09553 | Acute Toxicity                                              |
| A09554 | Mutagenicity                                                |
| A09555 | Acute Toxicity                                              |
| A09556 | Acute Toxicity                                              |
| A09557 | Acute Toxicity                                              |
| A09558 | Acute Toxicity                                              |
| A09559 | Multiple Dose Effects                                       |
| A09560 | Acute Toxicity                                              |
| A09561 | Mutagenicity                                                |
| A09562 | Acute Toxicity                                              |
| A09563 | Skin and Eye Irritation                                     |
| A09564 | Acute Toxicity                                              |
| A09565 | Acute Toxicity                                              |
| A09566 | Acute Toxicity, Reproductive Effects                        |
| A09567 | Acute Toxicity                                              |
| A09568 | Acute Toxicity, Multiple Dose Effects                       |
| A09569 | Acute Toxicity                                              |
| A09570 | Non-toxicity                                                |
| A09571 | Mutagenicity                                                |
| A09572 | Non-toxicity                                                |
| A09573 | Mutagenicity                                                |
| A09574 | Acute Toxicity                                              |
| A09575 | Acute Toxicity                                              |
| A09576 | Acute Toxicity                                              |
| A09577 | Acute Toxicity, Multiple Dose Effects                       |
| A09578 | Acute Toxicity                                              |

|        |                                                                              |
|--------|------------------------------------------------------------------------------|
| A09579 | Acute Toxicity                                                               |
| A09580 | Acute Toxicity                                                               |
| A09581 | Acute Toxicity, Skin and Eye Irritation, Reproductive Effects, Multiple Dose |
| A09582 | Acute Toxicity, Reproductive Effects, Multiple Dose Effects                  |
| A09583 | Acute Toxicity                                                               |
| A09584 | Acute Toxicity                                                               |
| A09585 | Acute Toxicity                                                               |
| A09586 | Acute Toxicity                                                               |
| A09587 | Acute Toxicity                                                               |
| A09588 | Acute Toxicity                                                               |
| A09589 | Acute Toxicity, Reproductive Effects                                         |
| A09590 | Acute Toxicity, Reproductive Effects                                         |
| A09591 | Acute Toxicity, Mutagenicity, Tumorigenicity, Reproductive Effects,          |
| A09592 | Acute Toxicity, Multiple Dose Effects                                        |
| A09593 | Acute Toxicity                                                               |
| A09594 | Acute Toxicity                                                               |
| A09595 | Acute Toxicity                                                               |
| A09596 | Acute Toxicity                                                               |
| A09597 | Acute Toxicity                                                               |
| A09598 | Acute Toxicity, Mutagenicity                                                 |
| A09599 | Acute Toxicity                                                               |
| A09600 | Acute Toxicity                                                               |
| A09601 | Acute Toxicity                                                               |
| A09602 | Acute Toxicity, Multiple Dose Effects                                        |
| A09603 | Acute Toxicity, Mutagenicity                                                 |
| A09604 | Acute Toxicity                                                               |
| A09605 | Acute Toxicity, Multiple Dose Effects                                        |
| A09606 | Acute Toxicity, Reproductive Effects                                         |
| A09607 | Acute Toxicity, Mutagenicity, Reproductive Effects, Multiple Dose Effects    |
| A09608 | Acute Toxicity                                                               |
| A09609 | Acute Toxicity                                                               |
| A09610 | Acute Toxicity                                                               |
| A09611 | Acute Toxicity, Mutagenicity, Reproductive Effects, Multiple Dose Effects    |
| A09612 | Acute Toxicity, Reproductive Effects, Multiple Dose Effects                  |
| A09613 | Acute Toxicity                                                               |
| A09614 | Acute Toxicity                                                               |
| A09615 | Acute Toxicity                                                               |
| A09616 | Acute Toxicity                                                               |
| A09617 | Acute Toxicity                                                               |
| A09618 | Acute Toxicity                                                               |
| A09619 | Non-toxicity                                                                 |
| A09620 | Mutagenicity                                                                 |
| A09621 | Acute Toxicity, Reproductive Effects                                         |
| A09622 | Acute Toxicity                                                               |
| A09623 | Acute Toxicity                                                               |
| A09624 | Acute Toxicity, Mutagenicity, Multiple Dose Effects                          |



|        |                                                                              |
|--------|------------------------------------------------------------------------------|
| A09625 | Acute Toxicity, Skin and Eye Irritation, Reproductive Effects, Multiple Dose |
| A09626 | Acute Toxicity                                                               |
| A09627 | Non-toxicity                                                                 |
| A09628 | Acute Toxicity, Skin and Eye Irritation, Reproductive Effects, Multiple Dose |
| A09629 | Acute Toxicity                                                               |
| A09630 | Acute Toxicity, Tumorigenicity                                               |
| A09631 | Acute Toxicity, Mutagenicity, Reproductive Effects, Multiple Dose Effects    |
| A09632 | Acute Toxicity, Mutagenicity, Multiple Dose Effects                          |
| A09633 | Acute Toxicity, Mutagenicity, Tumorigenicity                                 |
| A09634 | Acute Toxicity                                                               |
| A09635 | Acute Toxicity                                                               |
| A09636 | Acute Toxicity                                                               |
| A09637 | Acute Toxicity                                                               |
| A09638 | Acute Toxicity                                                               |
| A09639 | Acute Toxicity                                                               |
| A09640 | Acute Toxicity                                                               |
| A09641 | Acute Toxicity                                                               |
| A09642 | Acute Toxicity                                                               |
| A09643 | Acute Toxicity                                                               |
| A09644 | Acute Toxicity, Mutagenicity                                                 |
| A09645 | Acute Toxicity                                                               |
| A09646 | Non-toxicity                                                                 |
| A09647 | Mutagenicity, Tumorigenicity                                                 |
| A09648 | Acute Toxicity, Multiple Dose Effects                                        |
| A09649 | Acute Toxicity                                                               |
| A09650 | Acute Toxicity, Mutagenicity                                                 |
| A09651 | Acute Toxicity                                                               |
| A09652 | Skin and Eye Irritation                                                      |
| A09653 | Acute Toxicity                                                               |
| A09654 | Acute Toxicity, Multiple Dose Effects                                        |
| A09655 | Acute Toxicity                                                               |
| A09656 | Acute Toxicity                                                               |
| A09657 | Acute Toxicity                                                               |
| A09658 | Acute Toxicity                                                               |
| A09659 | Multiple Dose Effects                                                        |
| A09660 | Acute Toxicity                                                               |
| A09661 | Acute Toxicity                                                               |
| A09662 | Acute Toxicity                                                               |
| A09663 | Multiple Dose Effects                                                        |
| A09664 | Mutagenicity, Reproductive Effects                                           |
| A09665 | Reproductive Effects                                                         |
| A09666 | Acute Toxicity, Mutagenicity, Reproductive Effects                           |
| A09667 | Acute Toxicity                                                               |
| A09668 | Acute Toxicity, Mutagenicity                                                 |
| A09669 | Acute Toxicity                                                               |
| A09670 | Acute Toxicity, Mutagenicity, Multiple Dose Effects                          |

|        |                                                                           |
|--------|---------------------------------------------------------------------------|
| A09671 | Acute Toxicity, Mutagenicity, Reproductive Effects                        |
| A09672 | Acute Toxicity, Skin and Eye Irritation                                   |
| A09673 | Acute Toxicity, Mutagenicity, Reproductive Effects, Multiple Dose Effects |
| A09674 | Multiple Dose Effects                                                     |
| A09675 | Acute Toxicity, Reproductive Effects, Multiple Dose Effects               |
| A09676 | Acute Toxicity, Tumorigenicity                                            |
| A09677 | Acute Toxicity, Multiple Dose Effects                                     |
| A09678 | Acute Toxicity                                                            |
| A09679 | Acute Toxicity                                                            |
| A09680 | Mutagenicity                                                              |
| A09681 | Acute Toxicity                                                            |
| A09682 | Acute Toxicity                                                            |
| A09683 | Acute Toxicity                                                            |
| A09684 | Acute Toxicity                                                            |
| A09685 | Acute Toxicity                                                            |
| A09686 | Acute Toxicity                                                            |
| A09687 | Acute Toxicity, Reproductive Effects, Multiple Dose Effects               |
| A09688 | Acute Toxicity                                                            |
| A09689 | Acute Toxicity                                                            |
| A09690 | Acute Toxicity                                                            |
| A09691 | Multiple Dose Effects                                                     |
| A09692 | Acute Toxicity                                                            |
| A09693 | Acute Toxicity                                                            |
| A09694 | Acute Toxicity                                                            |
| A09695 | Acute Toxicity                                                            |
| A09696 | Acute Toxicity                                                            |
| A09697 | Acute Toxicity, Reproductive Effects, Multiple Dose Effects               |
| A09698 | Acute Toxicity                                                            |
| A09699 | Acute Toxicity                                                            |
| A09700 | Acute Toxicity                                                            |
| A09701 | Acute Toxicity                                                            |
| A09702 | Acute Toxicity, Reproductive Effects                                      |
| A09703 | Acute Toxicity, Reproductive Effects, Multiple Dose Effects               |
| A09704 | Acute Toxicity, Reproductive Effects                                      |
| A09705 | Acute Toxicity, Mutagenicity, Reproductive Effects, Multiple Dose Effects |
| A09706 | Acute Toxicity, Multiple Dose Effects                                     |
| A09707 | Acute Toxicity                                                            |
| A09708 | Acute Toxicity                                                            |
| A09709 | Acute Toxicity, Tumorigenicity                                            |
| A09710 | Acute Toxicity                                                            |
| A09711 | Acute Toxicity                                                            |
| A09712 | Acute Toxicity, Multiple Dose Effects                                     |
| A09713 | Acute Toxicity                                                            |
| A09714 | Mutagenicity                                                              |
| A09715 | Acute Toxicity, Multiple Dose Effects                                     |
| A09716 | Acute Toxicity                                                            |

|        |                                                                           |
|--------|---------------------------------------------------------------------------|
| A09717 | Acute Toxicity                                                            |
| A09718 | Acute Toxicity                                                            |
| A09719 | Acute Toxicity                                                            |
| A09720 | Acute Toxicity                                                            |
| A09721 | Acute Toxicity, Multiple Dose Effects                                     |
| A09722 | Acute Toxicity                                                            |
| A09723 | Acute Toxicity, Skin and Eye Irritation, Multiple Dose Effects            |
| A09724 | Acute Toxicity, Multiple Dose Effects                                     |
| A09725 | Mutagenicity                                                              |
| A09726 | Acute Toxicity                                                            |
| A09727 | Acute Toxicity, Mutagenicity, Reproductive Effects, Multiple Dose Effects |
| A09728 | Multiple Dose Effects                                                     |
| A09729 | Acute Toxicity, Mutagenicity                                              |
| A09730 | Acute Toxicity                                                            |
| A09731 | Acute Toxicity                                                            |
| A09732 | Acute Toxicity, Mutagenicity, Tumorigenicity, Multiple Dose Effects       |
| A09733 | Acute Toxicity, Mutagenicity, Tumorigenicity                              |
| A09734 | Multiple Dose Effects                                                     |
| A09735 | Acute Toxicity, Skin and Eye Irritation, Multiple Dose Effects            |
| A09736 | Mutagenicity                                                              |
| A09737 | Mutagenicity, Tumorigenicity                                              |
| A09738 | Tumorigenicity                                                            |
| A09739 | Acute Toxicity                                                            |
| A09740 | Acute Toxicity, Mutagenicity, Multiple Dose Effects                       |
| A09741 | Acute Toxicity, Multiple Dose Effects                                     |
| A09742 | Reproductive Effects                                                      |
| A09743 | Skin and Eye Irritation, Multiple Dose Effects                            |
| A09744 | Acute Toxicity                                                            |
| A09745 | Acute Toxicity, Tumorigenicity, Multiple Dose Effects                     |
| A09746 | Non-toxicity                                                              |
| A09747 | Acute Toxicity                                                            |
| A09748 | Acute Toxicity, Mutagenicity                                              |
| A09749 | Acute Toxicity, Mutagenicity                                              |
| A09750 | Acute Toxicity, Tumorigenicity, Multiple Dose Effects                     |
| A09751 | Acute Toxicity                                                            |
| A09752 | Acute Toxicity                                                            |
| A09753 | Acute Toxicity                                                            |
| A09754 | Acute Toxicity                                                            |
| A09755 | Acute Toxicity                                                            |
| A09756 | Mutagenicity                                                              |
| A09757 | Acute Toxicity, Multiple Dose Effects                                     |
| A09758 | Acute Toxicity, Mutagenicity, Tumorigenicity                              |
| A09759 | Acute Toxicity                                                            |
| A09760 | Acute Toxicity                                                            |
| A09761 | Acute Toxicity, Mutagenicity, Reproductive Effects, Multiple Dose Effects |
| A09762 | Mutagenicity, Reproductive Effects, Multiple Dose Effects                 |

|        |                                         |
|--------|-----------------------------------------|
| A09763 | Acute Toxicity                          |
| A09764 | Acute Toxicity, Multiple Dose Effects   |
| A09765 | Acute Toxicity                          |
| A09766 | Acute Toxicity                          |
| A09767 | Mutagenicity                            |
| A09768 | Acute Toxicity, Mutagenicity            |
| A09769 | Acute Toxicity                          |
| A09770 | Acute Toxicity, Skin and Eye Irritation |
| A09771 | Acute Toxicity, Mutagenicity            |
| A09772 | Mutagenicity                            |
| A09773 | Reproductive Effects                    |
| A09774 | Acute Toxicity, Reproductive Effects    |
| A09775 | Acute Toxicity                          |
| A09776 | Skin and Eye Irritation                 |
| A09777 | Mutagenicity                            |
| A09778 | Non-toxicity                            |
| A09779 | Acute Toxicity                          |
| A09780 | Acute Toxicity                          |
| A09781 | Mutagenicity                            |
| A09782 | Mutagenicity                            |
| A09783 | Acute Toxicity, Multiple Dose Effects   |
| A09784 | Acute Toxicity, Mutagenicity            |
| A09785 | Acute Toxicity                          |
| A09786 | Acute Toxicity                          |
| A09787 | Mutagenicity                            |
| A09788 | Acute Toxicity                          |
| A09789 | Acute Toxicity                          |
| A09790 | Acute Toxicity                          |
| A09791 | Mutagenicity                            |
| A09792 | Acute Toxicity                          |
| A09793 | Mutagenicity                            |
| A09794 | Reproductive Effects                    |
| A09795 | Acute Toxicity                          |
| A09796 | Mutagenicity, Tumorigenicity            |
| A09797 | Acute Toxicity, Mutagenicity            |
| A09798 | Acute Toxicity                          |
| A09799 | Acute Toxicity                          |
| A09800 | Acute Toxicity, Skin and Eye Irritation |
| A09801 | Acute Toxicity                          |
| A09802 | Acute Toxicity                          |
| A09803 | Mutagenicity, Tumorigenicity            |
| A09804 | Non-toxicity                            |
| A09805 | Acute Toxicity                          |
| A09806 | Acute Toxicity                          |
| A09807 | Acute Toxicity, Mutagenicity            |
| A09808 | Acute Toxicity                          |

|        |                                                       |
|--------|-------------------------------------------------------|
| A09809 | Acute Toxicity                                        |
| A09810 | Acute Toxicity                                        |
| A09811 | Mutagenicity, Multiple Dose Effects                   |
| A09812 | Mutagenicity                                          |
| A09813 | Acute Toxicity                                        |
| A09814 | Acute Toxicity                                        |
| A09815 | Reproductive Effects                                  |
| A09816 | Acute Toxicity                                        |
| A09817 | Acute Toxicity, Multiple Dose Effects                 |
| A09818 | Mutagenicity                                          |
| A09819 | Acute Toxicity, Mutagenicity                          |
| A09820 | Mutagenicity                                          |
| A09821 | Mutagenicity                                          |
| A09822 | Acute Toxicity, Mutagenicity                          |
| A09823 | Acute Toxicity                                        |
| A09824 | Mutagenicity                                          |
| A09825 | Acute Toxicity, Mutagenicity, Multiple Dose Effects   |
| A09826 | Reproductive Effects                                  |
| A09827 | Acute Toxicity                                        |
| A09828 | Multiple Dose Effects                                 |
| A09829 | Mutagenicity, Reproductive Effects                    |
| A09830 | Acute Toxicity                                        |
| A09831 | Skin and Eye Irritation                               |
| A09832 | Acute Toxicity                                        |
| A09833 | Acute Toxicity                                        |
| A09834 | Skin and Eye Irritation                               |
| A09835 | Acute Toxicity, Multiple Dose Effects                 |
| A09836 | Multiple Dose Effects                                 |
| A09837 | Acute Toxicity, Mutagenicity, Multiple Dose Effects   |
| A09838 | Acute Toxicity, Tumorigenicity                        |
| A09839 | Acute Toxicity                                        |
| A09840 | Mutagenicity                                          |
| A09841 | Acute Toxicity                                        |
| A09842 | Acute Toxicity                                        |
| A09843 | Tumorigenicity                                        |
| A09844 | Acute Toxicity                                        |
| A09845 | Acute Toxicity                                        |
| A09846 | Acute Toxicity, Mutagenicity, Multiple Dose Effects   |
| A09847 | Acute Toxicity, Mutagenicity, Skin and Eye Irritation |
| A09848 | Acute Toxicity                                        |
| A09849 | Acute Toxicity                                        |
| A09850 | Acute Toxicity                                        |
| A09851 | Acute Toxicity                                        |
| A09852 | Acute Toxicity, Multiple Dose Effects                 |
| A09853 | Mutagenicity                                          |
| A09854 | Non-toxicity                                          |

|        |                                                                |
|--------|----------------------------------------------------------------|
| A09855 | Acute Toxicity                                                 |
| A09856 | Acute Toxicity                                                 |
| A09857 | Acute Toxicity, Tumorigenicity                                 |
| A09858 | Acute Toxicity                                                 |
| A09859 | Mutagenicity                                                   |
| A09860 | Acute Toxicity                                                 |
| A09861 | Acute Toxicity                                                 |
| A09862 | Acute Toxicity, Reproductive Effects                           |
| A09863 | Acute Toxicity, Multiple Dose Effects                          |
| A09864 | Acute Toxicity                                                 |
| A09865 | Acute Toxicity, Mutagenicity, Reproductive Effects             |
| A09866 | Acute Toxicity                                                 |
| A09867 | Mutagenicity                                                   |
| A09868 | Acute Toxicity                                                 |
| A09869 | Mutagenicity                                                   |
| A09870 | Acute Toxicity                                                 |
| A09871 | Non-toxicity                                                   |
| A09872 | Mutagenicity, Reproductive Effects                             |
| A09873 | Acute Toxicity, Multiple Dose Effects                          |
| A09874 | Multiple Dose Effects                                          |
| A09875 | Acute Toxicity, Multiple Dose Effects                          |
| A09876 | Acute Toxicity, Reproductive Effects, Multiple Dose Effects    |
| A09877 | Acute Toxicity                                                 |
| A09878 | Acute Toxicity, Reproductive Effects, Multiple Dose Effects    |
| A09879 | Acute Toxicity, Multiple Dose Effects                          |
| A09880 | Acute Toxicity, Reproductive Effects, Multiple Dose Effects    |
| A09881 | Acute Toxicity, Multiple Dose Effects                          |
| A09882 | Acute Toxicity                                                 |
| A09883 | Mutagenicity                                                   |
| A09884 | Acute Toxicity                                                 |
| A09885 | Acute Toxicity                                                 |
| A09886 | Tumorigenicity                                                 |
| A09887 | Acute Toxicity                                                 |
| A09888 | Acute Toxicity                                                 |
| A09889 | Acute Toxicity                                                 |
| A09890 | Mutagenicity                                                   |
| A09891 | Multiple Dose Effects                                          |
| A09892 | Acute Toxicity, Mutagenicity, Multiple Dose Effects            |
| A09893 | Acute Toxicity                                                 |
| A09894 | Acute Toxicity                                                 |
| A09895 | Acute Toxicity, Skin and Eye Irritation, Multiple Dose Effects |
| A09896 | Acute Toxicity                                                 |
| A09897 | Non-toxicity                                                   |
| A09898 | Acute Toxicity, Multiple Dose Effects                          |
| A09899 | Mutagenicity                                                   |
| A09900 | Acute Toxicity                                                 |

|        |                                                                |
|--------|----------------------------------------------------------------|
| A09901 | Tumorigenicity                                                 |
| A09902 | Acute Toxicity                                                 |
| A09903 | Mutagenicity, Tumorigenicity                                   |
| A09904 | Acute Toxicity                                                 |
| A09905 | Acute Toxicity                                                 |
| A09906 | Tumorigenicity                                                 |
| A09907 | Acute Toxicity                                                 |
| A09908 | Acute Toxicity, Skin and Eye Irritation                        |
| A09909 | Acute Toxicity                                                 |
| A09910 | Skin and Eye Irritation                                        |
| A09911 | Mutagenicity                                                   |
| A09912 | Acute Toxicity                                                 |
| A09913 | Acute Toxicity                                                 |
| A09914 | Tumorigenicity                                                 |
| A09915 | Mutagenicity                                                   |
| A09916 | Acute Toxicity, Multiple Dose Effects                          |
| A09917 | Tumorigenicity                                                 |
| A09918 | Acute Toxicity                                                 |
| A09919 | Acute Toxicity, Skin and Eye Irritation, Multiple Dose Effects |
| A09920 | Acute Toxicity, Reproductive Effects                           |
| A09921 | Mutagenicity                                                   |
| A09922 | Acute Toxicity, Reproductive Effects, Multiple Dose Effects    |
| A09923 | Acute Toxicity, Mutagenicity                                   |
| A09924 | Acute Toxicity                                                 |
| A09925 | Mutagenicity                                                   |
| A09926 | Skin and Eye Irritation                                        |
| A09927 | Tumorigenicity                                                 |
| A09928 | Acute Toxicity                                                 |
| A09929 | Acute Toxicity                                                 |
| A09930 | Acute Toxicity                                                 |
| A09931 | Acute Toxicity                                                 |
| A09932 | Acute Toxicity, Reproductive Effects, Multiple Dose Effects    |
| A09933 | Acute Toxicity, Mutagenicity, Tumorigenicity                   |
| A09934 | Acute Toxicity                                                 |
| A09935 | Mutagenicity                                                   |
| A09936 | Acute Toxicity                                                 |
| A09937 | Non-toxicity                                                   |
| A09938 | Mutagenicity                                                   |
| A09939 | Acute Toxicity, Tumorigenicity                                 |
| A09940 | Acute Toxicity                                                 |
| A09941 | Acute Toxicity                                                 |
| A09942 | Acute Toxicity                                                 |
| A09943 | Acute Toxicity, Multiple Dose Effects                          |
| A09944 | Acute Toxicity                                                 |
| A09945 | Acute Toxicity, Reproductive Effects                           |
| A09946 | Mutagenicity                                                   |

|        |                                                       |
|--------|-------------------------------------------------------|
| A09947 | Acute Toxicity                                        |
| A09948 | Acute Toxicity                                        |
| A09949 | Tumorigenicity                                        |
| A09950 | Acute Toxicity, Mutagenicity, Tumorigenicity          |
| A09951 | Acute Toxicity                                        |
| A09952 | Mutagenicity, Reproductive Effects                    |
| A09953 | Mutagenicity, Reproductive Effects                    |
| A09954 | Acute Toxicity                                        |
| A09955 | Acute Toxicity, Reproductive Effects                  |
| A09956 | Tumorigenicity                                        |
| A09957 | Acute Toxicity, Mutagenicity                          |
| A09958 | Acute Toxicity                                        |
| A09959 | Acute Toxicity                                        |
| A09960 | Acute Toxicity                                        |
| A09961 | Skin and Eye Irritation                               |
| A09962 | Mutagenicity                                          |
| A09963 | Acute Toxicity, Mutagenicity, Reproductive Effects    |
| A09964 | Acute Toxicity                                        |
| A09965 | Acute Toxicity                                        |
| A09966 | Acute Toxicity                                        |
| A09967 | Skin and Eye Irritation                               |
| A09968 | Acute Toxicity                                        |
| A09969 | Acute Toxicity                                        |
| A09970 | Acute Toxicity                                        |
| A09971 | Skin and Eye Irritation                               |
| A09972 | Acute Toxicity                                        |
| A09973 | Acute Toxicity                                        |
| A09974 | Acute Toxicity                                        |
| A09975 | Acute Toxicity, Mutagenicity, Skin and Eye Irritation |
| A09976 | Acute Toxicity                                        |
| A09977 | Acute Toxicity                                        |
| A09978 | Acute Toxicity                                        |
| A09979 | Acute Toxicity                                        |
| A09980 | Mutagenicity                                          |
| A09981 | Acute Toxicity                                        |
| A09982 | Acute Toxicity                                        |
| A09983 | Acute Toxicity                                        |
| A09984 | Multiple Dose Effects                                 |
| A09985 | Acute Toxicity                                        |
| A09986 | Acute Toxicity                                        |
| A09987 | Acute Toxicity                                        |
| A09988 | Acute Toxicity, Mutagenicity, Skin and Eye Irritation |
| A09989 | Acute Toxicity, Skin and Eye Irritation               |
| A09990 | Acute Toxicity                                        |
| A09991 | Acute Toxicity, Multiple Dose Effects                 |
| A09992 | Mutagenicity                                          |



|        |                                                                |
|--------|----------------------------------------------------------------|
| A09993 | Acute Toxicity                                                 |
| A09994 | Acute Toxicity                                                 |
| A09995 | Acute Toxicity, Mutagenicity                                   |
| A09996 | Acute Toxicity, Mutagenicity, Multiple Dose Effects            |
| A09997 | Multiple Dose Effects                                          |
| A09998 | Acute Toxicity                                                 |
| A09999 | Acute Toxicity                                                 |
| A10000 | Non-toxicity                                                   |
| A10001 | Multiple Dose Effects                                          |
| A10002 | Skin and Eye Irritation                                        |
| A10003 | Mutagenicity, Skin and Eye Irritation                          |
| A10004 | Acute Toxicity                                                 |
| A10005 | Acute Toxicity                                                 |
| A10006 | Acute Toxicity                                                 |
| A10007 | Acute Toxicity, Mutagenicity                                   |
| A10008 | Mutagenicity                                                   |
| A10009 | Multiple Dose Effects                                          |
| A10010 | Mutagenicity, Tumorigenicity                                   |
| A10011 | Acute Toxicity, Multiple Dose Effects                          |
| A10012 | Acute Toxicity                                                 |
| A10013 | Mutagenicity                                                   |
| A10014 | Non-toxicity                                                   |
| A10015 | Acute Toxicity                                                 |
| A10016 | Acute Toxicity                                                 |
| A10017 | Acute Toxicity                                                 |
| A10018 | Mutagenicity                                                   |
| A10019 | Acute Toxicity, Mutagenicity                                   |
| A10020 | Acute Toxicity                                                 |
| A10021 | Non-toxicity                                                   |
| A10022 | Acute Toxicity, Reproductive Effects                           |
| A10023 | Mutagenicity                                                   |
| A10024 | Tumorigenicity                                                 |
| A10025 | Acute Toxicity, Skin and Eye Irritation, Multiple Dose Effects |
| A10026 | Acute Toxicity                                                 |
| A10027 | Acute Toxicity, Mutagenicity                                   |
| A10028 | Acute Toxicity, Multiple Dose Effects                          |
| A10029 | Acute Toxicity                                                 |
| A10030 | Acute Toxicity, Skin and Eye Irritation, Multiple Dose Effects |
| A10031 | Acute Toxicity, Multiple Dose Effects                          |
| A10032 | Skin and Eye Irritation                                        |
| A10033 | Acute Toxicity, Skin and Eye Irritation                        |
| A10034 | Acute Toxicity, Multiple Dose Effects                          |
| A10035 | Acute Toxicity, Skin and Eye Irritation                        |
| A10036 | Acute Toxicity                                                 |
| A10037 | Acute Toxicity, Multiple Dose Effects                          |
| A10038 | Acute Toxicity, Multiple Dose Effects                          |

|        |                                                       |
|--------|-------------------------------------------------------|
| A10039 | Mutagenicity                                          |
| A10040 | Mutagenicity                                          |
| A10041 | Mutagenicity                                          |
| A10042 | Mutagenicity                                          |
| A10043 | Acute Toxicity                                        |
| A10044 | Skin and Eye Irritation, Multiple Dose Effects        |
| A10045 | Skin and Eye Irritation, Multiple Dose Effects        |
| A10046 | Skin and Eye Irritation, Multiple Dose Effects        |
| A10047 | Acute Toxicity                                        |
| A10048 | Acute Toxicity                                        |
| A10049 | Mutagenicity                                          |
| A10050 | Reproductive Effects                                  |
| A10051 | Non-toxicity                                          |
| A10052 | Acute Toxicity, Multiple Dose Effects                 |
| A10053 | Acute Toxicity, Skin and Eye Irritation               |
| A10054 | Acute Toxicity, Skin and Eye Irritation               |
| A10055 | Acute Toxicity                                        |
| A10056 | Multiple Dose Effects                                 |
| A10057 | Acute Toxicity                                        |
| A10058 | Acute Toxicity                                        |
| A10059 | Acute Toxicity                                        |
| A10060 | Acute Toxicity, Skin and Eye Irritation               |
| A10061 | Mutagenicity                                          |
| A10062 | Acute Toxicity, Skin and Eye Irritation               |
| A10063 | Non-toxicity                                          |
| A10064 | Acute Toxicity                                        |
| A10065 | Acute Toxicity                                        |
| A10066 | Acute Toxicity, Mutagenicity, Skin and Eye Irritation |
| A10067 | Mutagenicity                                          |
| A10068 | Acute Toxicity                                        |
| A10069 | Acute Toxicity                                        |
| A10070 | Acute Toxicity                                        |
| A10071 | Acute Toxicity                                        |
| A10072 | Mutagenicity, Multiple Dose Effects                   |
| A10073 | Acute Toxicity                                        |
| A10074 | Acute Toxicity                                        |
| A10075 | Acute Toxicity                                        |
| A10076 | Acute Toxicity                                        |
| A10077 | Acute Toxicity, Skin and Eye Irritation               |
| A10078 | Acute Toxicity, Mutagenicity                          |
| A10079 | Non-toxicity                                          |
| A10080 | Acute Toxicity                                        |
| A10081 | Mutagenicity                                          |
| A10082 | Acute Toxicity                                        |
| A10083 | Acute Toxicity                                        |
| A10084 | Reproductive Effects                                  |

|        |                                                     |
|--------|-----------------------------------------------------|
| A10085 | Mutagenicity                                        |
| A10086 | Non-toxicity                                        |
| A10087 | Acute Toxicity                                      |
| A10088 | Acute Toxicity, Mutagenicity                        |
| A10089 | Mutagenicity                                        |
| A10090 | Acute Toxicity                                      |
| A10091 | Skin and Eye Irritation                             |
| A10092 | Acute Toxicity                                      |
| A10093 | Acute Toxicity, Tumorigenicity                      |
| A10094 | Acute Toxicity                                      |
| A10095 | Mutagenicity, Tumorigenicity                        |
| A10096 | Mutagenicity, Tumorigenicity                        |
| A10097 | Acute Toxicity                                      |
| A10098 | Acute Toxicity                                      |
| A10099 | Acute Toxicity                                      |
| A10100 | Acute Toxicity                                      |
| A10101 | Mutagenicity, Tumorigenicity                        |
| A10102 | Reproductive Effects                                |
| A10103 | Multiple Dose Effects                               |
| A10104 | Acute Toxicity                                      |
| A10105 | Acute Toxicity                                      |
| A10106 | Acute Toxicity                                      |
| A10107 | Acute Toxicity                                      |
| A10108 | Acute Toxicity                                      |
| A10109 | Acute Toxicity                                      |
| A10110 | Acute Toxicity                                      |
| A10111 | Acute Toxicity                                      |
| A10112 | Acute Toxicity                                      |
| A10113 | Non-toxicity                                        |
| A10114 | Acute Toxicity                                      |
| A10115 | Acute Toxicity                                      |
| A10116 | Acute Toxicity, Mutagenicity, Multiple Dose Effects |
| A10117 | Acute Toxicity                                      |
| A10118 | Acute Toxicity                                      |
| A10119 | Acute Toxicity                                      |
| A10120 | Acute Toxicity                                      |
| A10121 | Acute Toxicity, Multiple Dose Effects               |
| A10122 | Acute Toxicity                                      |
| A10123 | Acute Toxicity                                      |
| A10124 | Acute Toxicity, Skin and Eye Irritation             |
| A10125 | Mutagenicity                                        |
| A10126 | Acute Toxicity                                      |
| A10127 | Mutagenicity                                        |
| A10128 | Tumorigenicity                                      |
| A10129 | Acute Toxicity                                      |
| A10130 | Mutagenicity                                        |

|        |                                                                              |
|--------|------------------------------------------------------------------------------|
| A10131 | Acute Toxicity                                                               |
| A10132 | Acute Toxicity                                                               |
| A10133 | Acute Toxicity                                                               |
| A10134 | Acute Toxicity, Reproductive Effects, Multiple Dose Effects                  |
| A10135 | Acute Toxicity                                                               |
| A10136 | Mutagenicity                                                                 |
| A10137 | Acute Toxicity                                                               |
| A10138 | Acute Toxicity                                                               |
| A10139 | Mutagenicity                                                                 |
| A10140 | Acute Toxicity, Tumorigenicity                                               |
| A10141 | Acute Toxicity                                                               |
| A10142 | Acute Toxicity                                                               |
| A10143 | Acute Toxicity                                                               |
| A10144 | Acute Toxicity                                                               |
| A10145 | Acute Toxicity, Skin and Eye Irritation                                      |
| A10146 | Acute Toxicity, Skin and Eye Irritation, Reproductive Effects, Multiple Dose |
| A10147 | Multiple Dose Effects                                                        |
| A10148 | Acute Toxicity, Multiple Dose Effects                                        |
| A10149 | Acute Toxicity, Skin and Eye Irritation, Multiple Dose Effects               |
| A10150 | Acute Toxicity                                                               |
| A10151 | Acute Toxicity, Multiple Dose Effects                                        |
| A10152 | Acute Toxicity                                                               |
| A10153 | Skin and Eye Irritation                                                      |
| A10154 | Acute Toxicity                                                               |
| A10155 | Acute Toxicity                                                               |
| A10156 | Acute Toxicity, Mutagenicity, Tumorigenicity                                 |
| A10157 | Acute Toxicity                                                               |
| A10158 | Mutagenicity                                                                 |
| A10159 | Acute Toxicity, Mutagenicity, Tumorigenicity, Reproductive Effects,          |
| A10160 | Mutagenicity                                                                 |
| A10161 | Acute Toxicity, Mutagenicity                                                 |
| A10162 | Acute Toxicity                                                               |
| A10163 | Acute Toxicity                                                               |
| A10164 | Non-toxicity                                                                 |
| A10165 | Acute Toxicity                                                               |
| A10166 | Mutagenicity                                                                 |
| A10167 | Acute Toxicity                                                               |
| A10168 | Acute Toxicity, Mutagenicity                                                 |
| A10169 | Tumorigenicity                                                               |
| A10170 | Acute Toxicity                                                               |
| A10171 | Mutagenicity                                                                 |
| A10172 | Mutagenicity, Tumorigenicity                                                 |
| A10173 | Mutagenicity                                                                 |
| A10174 | Acute Toxicity                                                               |
| A10175 | Non-toxicity                                                                 |
| A10176 | Acute Toxicity, Mutagenicity                                                 |

|        |                                                                |
|--------|----------------------------------------------------------------|
| A10177 | Skin and Eye Irritation                                        |
| A10178 | Skin and Eye Irritation                                        |
| A10179 | Non-toxicity                                                   |
| A10180 | Acute Toxicity                                                 |
| A10181 | Acute Toxicity                                                 |
| A10182 | Acute Toxicity                                                 |
| A10183 | Acute Toxicity, Skin and Eye Irritation                        |
| A10184 | Acute Toxicity                                                 |
| A10185 | Mutagenicity                                                   |
| A10186 | Acute Toxicity                                                 |
| A10187 | Acute Toxicity                                                 |
| A10188 | Acute Toxicity                                                 |
| A10189 | Skin and Eye Irritation                                        |
| A10190 | Acute Toxicity                                                 |
| A10191 | Acute Toxicity                                                 |
| A10192 | Acute Toxicity                                                 |
| A10193 | Mutagenicity                                                   |
| A10194 | Mutagenicity                                                   |
| A10195 | Acute Toxicity                                                 |
| A10196 | Mutagenicity                                                   |
| A10197 | Acute Toxicity                                                 |
| A10198 | Mutagenicity, Tumorigenicity                                   |
| A10199 | Reproductive Effects                                           |
| A10200 | Acute Toxicity, Skin and Eye Irritation                        |
| A10201 | Acute Toxicity, Tumorigenicity                                 |
| A10202 | Multiple Dose Effects                                          |
| A10203 | Mutagenicity                                                   |
| A10204 | Acute Toxicity                                                 |
| A10205 | Non-toxicity                                                   |
| A10206 | Acute Toxicity                                                 |
| A10207 | Acute Toxicity                                                 |
| A10208 | Acute Toxicity                                                 |
| A10209 | Acute Toxicity                                                 |
| A10210 | Acute Toxicity                                                 |
| A10211 | Acute Toxicity, Skin and Eye Irritation, Multiple Dose Effects |
| A10212 | Acute Toxicity                                                 |
| A10213 | Acute Toxicity                                                 |
| A10214 | Non-toxicity                                                   |
| A10215 | Mutagenicity                                                   |
| A10216 | Acute Toxicity                                                 |
| A10217 | Non-toxicity                                                   |
| A10218 | Acute Toxicity                                                 |
| A10219 | Acute Toxicity                                                 |
| A10220 | Acute Toxicity, Skin and Eye Irritation, Multiple Dose Effects |
| A10221 | Acute Toxicity                                                 |
| A10222 | Skin and Eye Irritation, Multiple Dose Effects                 |

|        |                                                                              |
|--------|------------------------------------------------------------------------------|
| A10223 | Acute Toxicity, Mutagenicity                                                 |
| A10224 | Mutagenicity                                                                 |
| A10225 | Acute Toxicity, Tumorigenicity                                               |
| A10226 | Multiple Dose Effects                                                        |
| A10227 | Acute Toxicity                                                               |
| A10228 | Acute Toxicity, Mutagenicity                                                 |
| A10229 | Acute Toxicity                                                               |
| A10230 | Acute Toxicity                                                               |
| A10231 | Acute Toxicity                                                               |
| A10232 | Acute Toxicity                                                               |
| A10233 | Non-toxicity                                                                 |
| A10234 | Acute Toxicity, Reproductive Effects                                         |
| A10235 | Acute Toxicity                                                               |
| A10236 | Mutagenicity                                                                 |
| A10237 | Acute Toxicity                                                               |
| A10238 | Acute Toxicity, Multiple Dose Effects                                        |
| A10239 | Acute Toxicity, Mutagenicity, Skin and Eye Irritation                        |
| A10240 | Acute Toxicity                                                               |
| A10241 | Acute Toxicity, Skin and Eye Irritation, Reproductive Effects, Multiple Dose |
| A10242 | Mutagenicity                                                                 |
| A10243 | Acute Toxicity                                                               |
| A10244 | Acute Toxicity                                                               |
| A10245 | Acute Toxicity                                                               |
| A10246 | Acute Toxicity                                                               |
| A10247 | Mutagenicity                                                                 |
| A10248 | Acute Toxicity                                                               |
| A10249 | Acute Toxicity                                                               |
| A10250 | Acute Toxicity, Tumorigenicity                                               |
| A10251 | Acute Toxicity                                                               |
| A10252 | Mutagenicity                                                                 |
| A10253 | Acute Toxicity, Reproductive Effects, Multiple Dose Effects                  |
| A10254 | Mutagenicity                                                                 |
| A10255 | Acute Toxicity, Multiple Dose Effects                                        |
| A10256 | Mutagenicity                                                                 |
| A10257 | Mutagenicity                                                                 |
| A10258 | Mutagenicity                                                                 |
| A10259 | Acute Toxicity                                                               |
| A10260 | Acute Toxicity, Multiple Dose Effects                                        |
| A10261 | Tumorigenicity                                                               |
| A10262 | Acute Toxicity                                                               |
| A10263 | Reproductive Effects                                                         |
| A10264 | Mutagenicity                                                                 |
| A10265 | Non-toxicity                                                                 |
| A10266 | Acute Toxicity                                                               |
| A10267 | Acute Toxicity, Skin and Eye Irritation                                      |
| A10268 | Acute Toxicity                                                               |

|        |                                                       |
|--------|-------------------------------------------------------|
| A10269 | Acute Toxicity                                        |
| A10270 | Mutagenicity                                          |
| A10271 | Acute Toxicity                                        |
| A10272 | Mutagenicity, Multiple Dose Effects                   |
| A10273 | Acute Toxicity                                        |
| A10274 | Mutagenicity, Tumorigenicity                          |
| A10275 | Acute Toxicity                                        |
| A10276 | Mutagenicity, Tumorigenicity                          |
| A10277 | Acute Toxicity                                        |
| A10278 | Mutagenicity, Tumorigenicity                          |
| A10279 | Acute Toxicity, Skin and Eye Irritation               |
| A10280 | Acute Toxicity                                        |
| A10281 | Acute Toxicity, Mutagenicity                          |
| A10282 | Acute Toxicity                                        |
| A10283 | Acute Toxicity                                        |
| A10284 | Mutagenicity                                          |
| A10285 | Acute Toxicity                                        |
| A10286 | Acute Toxicity, Mutagenicity, Skin and Eye Irritation |
| A10287 | Acute Toxicity                                        |
| A10288 | Non-toxicity                                          |
| A10289 | Mutagenicity                                          |
| A10290 | Mutagenicity                                          |
| A10291 | Acute Toxicity, Mutagenicity                          |
| A10292 | Mutagenicity                                          |
| A10293 | Acute Toxicity                                        |
| A10294 | Mutagenicity                                          |
| A10295 | Acute Toxicity, Tumorigenicity                        |
| A10296 | Acute Toxicity                                        |
| A10297 | Acute Toxicity, Skin and Eye Irritation               |
| A10298 | Acute Toxicity                                        |
| A10299 | Mutagenicity                                          |
| A10300 | Tumorigenicity                                        |
| A10301 | Acute Toxicity                                        |
| A10302 | Acute Toxicity                                        |
| A10303 | Mutagenicity                                          |
| A10304 | Acute Toxicity                                        |
| A10305 | Acute Toxicity, Multiple Dose Effects                 |
| A10306 | Acute Toxicity                                        |
| A10307 | Acute Toxicity                                        |
| A10308 | Mutagenicity                                          |
| A10309 | Mutagenicity                                          |
| A10310 | Acute Toxicity                                        |
| A10311 | Acute Toxicity                                        |
| A10312 | Acute Toxicity                                        |
| A10313 | Skin and Eye Irritation                               |
| A10314 | Mutagenicity                                          |

|        |                                                                              |
|--------|------------------------------------------------------------------------------|
| A10315 | Acute Toxicity, Multiple Dose Effects                                        |
| A10316 | Acute Toxicity, Multiple Dose Effects                                        |
| A10317 | Acute Toxicity, Skin and Eye Irritation, Reproductive Effects, Multiple Dose |
| A10318 | Acute Toxicity, Mutagenicity, Reproductive Effects, Multiple Dose Effects    |
| A10319 | Acute Toxicity, Mutagenicity                                                 |
| A10320 | Acute Toxicity, Multiple Dose Effects                                        |
| A10321 | Acute Toxicity                                                               |
| A10322 | Acute Toxicity                                                               |
| A10323 | Mutagenicity                                                                 |
| A10324 | Acute Toxicity                                                               |
| A10325 | Acute Toxicity                                                               |
| A10326 | Acute Toxicity                                                               |
| A10327 | Skin and Eye Irritation, Multiple Dose Effects                               |
| A10328 | Acute Toxicity                                                               |
| A10329 | Mutagenicity                                                                 |
| A10330 | Acute Toxicity                                                               |
| A10331 | Acute Toxicity                                                               |
| A10332 | Mutagenicity                                                                 |
| A10333 | Acute Toxicity                                                               |
| A10334 | Acute Toxicity, Multiple Dose Effects                                        |
| A10335 | Acute Toxicity, Mutagenicity, Tumorigenicity                                 |
| A10336 | Multiple Dose Effects                                                        |
| A10337 | Acute Toxicity, Skin and Eye Irritation, Multiple Dose Effects               |
| A10338 | Acute Toxicity                                                               |
| A10339 | Multiple Dose Effects                                                        |
| A10340 | Non-toxicity                                                                 |
| A10341 | Mutagenicity                                                                 |
| A10342 | Non-toxicity                                                                 |
| A10343 | Acute Toxicity, Skin and Eye Irritation                                      |
| A10344 | Acute Toxicity, Mutagenicity, Tumorigenicity                                 |
| A10345 | Acute Toxicity, Mutagenicity, Tumorigenicity, Reproductive Effects           |
| A10346 | Acute Toxicity, Skin and Eye Irritation                                      |
| A10347 | Acute Toxicity                                                               |
| A10348 | Acute Toxicity, Tumorigenicity, Multiple Dose Effects                        |
| A10349 | Tumorigenicity                                                               |
| A10350 | Acute Toxicity, Mutagenicity, Tumorigenicity                                 |
| A10351 | Acute Toxicity, Mutagenicity, Tumorigenicity                                 |
| A10352 | Acute Toxicity                                                               |
| A10353 | Mutagenicity, Tumorigenicity                                                 |
| A10354 | Acute Toxicity, Mutagenicity, Tumorigenicity                                 |
| A10355 | Acute Toxicity                                                               |
| A10356 | Mutagenicity                                                                 |
| A10357 | Acute Toxicity, Mutagenicity                                                 |
| A10358 | Acute Toxicity, Mutagenicity, Tumorigenicity, Reproductive Effects           |
| A10359 | Multiple Dose Effects                                                        |
| A10360 | Acute Toxicity                                                               |



|        |                                                                                              |
|--------|----------------------------------------------------------------------------------------------|
| A10361 | Acute Toxicity, Tumorigenicity                                                               |
| A10362 | Acute Toxicity                                                                               |
| A10363 | Mutagenicity                                                                                 |
| A10364 | Non-toxicity                                                                                 |
| A10365 | Multiple Dose Effects                                                                        |
| A10366 | Acute Toxicity                                                                               |
| A10367 | Acute Toxicity                                                                               |
| A10368 | Acute Toxicity                                                                               |
| A10369 | Mutagenicity                                                                                 |
| A10370 | Acute Toxicity, Mutagenicity, Skin and Eye Irritation, Multiple Dose Effects                 |
| A10371 | Acute Toxicity                                                                               |
| A10372 | Acute Toxicity, Multiple Dose Effects                                                        |
| A10373 | Acute Toxicity, Mutagenicity, Tumorigenicity, Skin and Eye Irritation, Multiple Dose Effects |
| A10374 | Acute Toxicity                                                                               |
| A10375 | Acute Toxicity                                                                               |
| A10376 | Acute Toxicity                                                                               |
| A10377 | Acute Toxicity                                                                               |
| A10378 | Acute Toxicity                                                                               |
| A10379 | Acute Toxicity                                                                               |
| A10380 | Acute Toxicity                                                                               |
| A10381 | Acute Toxicity                                                                               |
| A10382 | Acute Toxicity, Mutagenicity                                                                 |
| A10383 | Mutagenicity                                                                                 |
| A10384 | Non-toxicity                                                                                 |
| A10385 | Acute Toxicity                                                                               |
| A10386 | Mutagenicity                                                                                 |
| A10387 | Mutagenicity                                                                                 |
| A10388 | Acute Toxicity                                                                               |
| A10389 | Acute Toxicity                                                                               |
| A10390 | Acute Toxicity                                                                               |
| A10391 | Multiple Dose Effects                                                                        |
| A10392 | Acute Toxicity, Multiple Dose Effects                                                        |
| A10393 | Acute Toxicity                                                                               |
| A10394 | Acute Toxicity                                                                               |
| A10395 | Acute Toxicity                                                                               |
| A10396 | Acute Toxicity                                                                               |
| A10397 | Acute Toxicity                                                                               |
| A10398 | Mutagenicity                                                                                 |
| A10399 | Acute Toxicity                                                                               |
| A10400 | Acute Toxicity                                                                               |
| A10401 | Mutagenicity, Tumorigenicity                                                                 |
| A10402 | Acute Toxicity                                                                               |
| A10403 | Acute Toxicity                                                                               |
| A10404 | Mutagenicity, Tumorigenicity                                                                 |
| A10405 | Mutagenicity                                                                                 |

|        |                                                                                                    |
|--------|----------------------------------------------------------------------------------------------------|
| A10406 | Acute Toxicity                                                                                     |
| A10407 | Acute Toxicity                                                                                     |
| A10408 | Acute Toxicity                                                                                     |
| A10409 | Acute Toxicity, Reproductive Effects, Multiple Dose Effects                                        |
| A10410 | Skin and Eye Irritation                                                                            |
| A10411 | Acute Toxicity, Mutagenicity, Tumorigenicity                                                       |
| A10412 | Acute Toxicity                                                                                     |
| A10413 | Acute Toxicity, Reproductive Effects, Multiple Dose Effects                                        |
| A10414 | Acute Toxicity, Skin and Eye Irritation, Multiple Dose Effects                                     |
| A10415 | Acute Toxicity                                                                                     |
| A10416 | Acute Toxicity, Skin and Eye Irritation, Multiple Dose Effects                                     |
| A10417 | Acute Toxicity                                                                                     |
| A10418 | Acute Toxicity, Mutagenicity, Skin and Eye Irritation, Reproductive Effects, Multiple Dose Effects |
| A10419 | Acute Toxicity, Multiple Dose Effects                                                              |
| A10420 | Acute Toxicity, Reproductive Effects, Multiple Dose Effects                                        |
| A10421 | Acute Toxicity, Skin and Eye Irritation, Reproductive Effects, Multiple Dose                       |
| A10422 | Acute Toxicity                                                                                     |
| A10423 | Acute Toxicity                                                                                     |
| A10424 | Acute Toxicity, Tumorigenicity, Reproductive Effects, Multiple Dose Effects                        |
| A10425 | Acute Toxicity, Reproductive Effects, Multiple Dose Effects                                        |
| A10426 | Multiple Dose Effects                                                                              |
| A10427 | Acute Toxicity, Reproductive Effects, Multiple Dose Effects                                        |
| A10428 | Acute Toxicity                                                                                     |
| A10429 | Acute Toxicity, Multiple Dose Effects                                                              |
| A10430 | Acute Toxicity, Multiple Dose Effects                                                              |
| A10431 | Acute Toxicity, Reproductive Effects, Multiple Dose Effects                                        |
| A10432 | Multiple Dose Effects                                                                              |
| A10433 | Mutagenicity                                                                                       |
| A10434 | Acute Toxicity                                                                                     |
| A10435 | Acute Toxicity                                                                                     |
| A10436 | Reproductive Effects                                                                               |
| A10437 | Acute Toxicity, Multiple Dose Effects                                                              |
| A10438 | Multiple Dose Effects                                                                              |
| A10439 | Acute Toxicity, Multiple Dose Effects                                                              |
| A10440 | Acute Toxicity, Mutagenicity, Multiple Dose Effects                                                |
| A10441 | Acute Toxicity, Skin and Eye Irritation, Multiple Dose Effects                                     |
| A10442 | Acute Toxicity, Skin and Eye Irritation, Multiple Dose Effects                                     |
| A10443 | Acute Toxicity, Multiple Dose Effects                                                              |
| A10444 | Multiple Dose Effects                                                                              |
| A10445 | Mutagenicity                                                                                       |
| A10446 | Acute Toxicity, Reproductive Effects, Multiple Dose Effects                                        |
| A10447 | Multiple Dose Effects                                                                              |
| A10448 | Acute Toxicity                                                                                     |
| A10449 | Acute Toxicity, Multiple Dose Effects                                                              |
| A10450 | Mutagenicity, Tumorigenicity                                                                       |

|        |                                                                           |
|--------|---------------------------------------------------------------------------|
| A10451 | Reproductive Effects, Multiple Dose Effects                               |
| A10452 | Reproductive Effects, Multiple Dose Effects                               |
| A10453 | Tumorigenicity, Multiple Dose Effects                                     |
| A10454 | Multiple Dose Effects                                                     |
| A10455 | Acute Toxicity, Multiple Dose Effects                                     |
| A10456 | Skin and Eye Irritation, Multiple Dose Effects                            |
| A10457 | Acute Toxicity, Tumorigenicity, Multiple Dose Effects                     |
| A10458 | Acute Toxicity, Reproductive Effects, Multiple Dose Effects               |
| A10459 | Acute Toxicity                                                            |
| A10460 | Mutagenicity                                                              |
| A10461 | Mutagenicity                                                              |
| A10462 | Acute Toxicity                                                            |
| A10463 | Acute Toxicity                                                            |
| A10464 | Acute Toxicity                                                            |
| A10465 | Acute Toxicity                                                            |
| A10466 | Acute Toxicity, Multiple Dose Effects                                     |
| A10467 | Acute Toxicity                                                            |
| A10468 | Acute Toxicity                                                            |
| A10469 | Mutagenicity                                                              |
| A10470 | Mutagenicity                                                              |
| A10471 | Acute Toxicity, Multiple Dose Effects                                     |
| A10472 | Mutagenicity                                                              |
| A10473 | Acute Toxicity, Mutagenicity, Skin and Eye Irritation                     |
| A10474 | Acute Toxicity                                                            |
| A10475 | Acute Toxicity, Mutagenicity, Reproductive Effects, Multiple Dose Effects |
| A10476 | Acute Toxicity                                                            |
| A10477 | Acute Toxicity, Reproductive Effects                                      |
| A10478 | Acute Toxicity                                                            |
| A10479 | Acute Toxicity                                                            |
| A10480 | Acute Toxicity                                                            |
| A10481 | Acute Toxicity                                                            |
| A10482 | Mutagenicity                                                              |
| A10483 | Acute Toxicity                                                            |
| A10484 | Acute Toxicity                                                            |
| A10485 | Acute Toxicity                                                            |
| A10486 | Tumorigenicity                                                            |
| A10487 | Acute Toxicity                                                            |
| A10488 | Acute Toxicity                                                            |
| A10489 | Skin and Eye Irritation                                                   |
| A10490 | Acute Toxicity                                                            |
| A10491 | Acute Toxicity, Skin and Eye Irritation                                   |
| A10492 | Acute Toxicity                                                            |
| A10493 | Acute Toxicity                                                            |
| A10494 | Acute Toxicity                                                            |
| A10495 | Acute Toxicity                                                            |
| A10496 | Acute Toxicity                                                            |

|        |                                                                           |
|--------|---------------------------------------------------------------------------|
| A10497 | Acute Toxicity                                                            |
| A10498 | Acute Toxicity, Reproductive Effects                                      |
| A10499 | Non-toxicity                                                              |
| A10500 | Mutagenicity                                                              |
| A10501 | Acute Toxicity                                                            |
| A10502 | Mutagenicity, Tumorigenicity, Reproductive Effects                        |
| A10503 | Acute Toxicity                                                            |
| A10504 | Acute Toxicity                                                            |
| A10505 | Acute Toxicity                                                            |
| A10506 | Acute Toxicity                                                            |
| A10507 | Acute Toxicity                                                            |
| A10508 | Multiple Dose Effects                                                     |
| A10509 | Acute Toxicity                                                            |
| A10510 | Non-toxicity                                                              |
| A10511 | Mutagenicity, Tumorigenicity                                              |
| A10512 | Acute Toxicity                                                            |
| A10513 | Acute Toxicity                                                            |
| A10514 | Acute Toxicity, Mutagenicity, Reproductive Effects                        |
| A10515 | Mutagenicity, Tumorigenicity                                              |
| A10516 | Acute Toxicity                                                            |
| A10517 | Acute Toxicity                                                            |
| A10518 | Acute Toxicity                                                            |
| A10519 | Acute Toxicity                                                            |
| A10520 | Acute Toxicity                                                            |
| A10521 | Mutagenicity, Tumorigenicity                                              |
| A10522 | Acute Toxicity                                                            |
| A10523 | Acute Toxicity                                                            |
| A10524 | Acute Toxicity                                                            |
| A10525 | Acute Toxicity, Mutagenicity, Multiple Dose Effects                       |
| A10526 | Acute Toxicity                                                            |
| A10527 | Acute Toxicity, Mutagenicity, Reproductive Effects, Multiple Dose Effects |
| A10528 | Mutagenicity                                                              |
| A10529 | Acute Toxicity, Multiple Dose Effects                                     |
| A10530 | Mutagenicity                                                              |
| A10531 | Mutagenicity                                                              |
| A10532 | Acute Toxicity, Mutagenicity, Tumorigenicity, Skin and Eye Irritation,    |
| A10533 | Acute Toxicity                                                            |
| A10534 | Acute Toxicity                                                            |
| A10535 | Acute Toxicity                                                            |
| A10536 | Acute Toxicity                                                            |
| A10537 | Acute Toxicity                                                            |
| A10538 | Acute Toxicity, Reproductive Effects, Multiple Dose Effects               |
| A10539 | Acute Toxicity                                                            |
| A10540 | Mutagenicity                                                              |
| A10541 | Acute Toxicity                                                            |
| A10542 | Acute Toxicity                                                            |

|        |                                                                |
|--------|----------------------------------------------------------------|
| A10543 | Acute Toxicity                                                 |
| A10544 | Non-toxicity                                                   |
| A10545 | Acute Toxicity, Skin and Eye Irritation                        |
| A10546 | Acute Toxicity, Multiple Dose Effects                          |
| A10547 | Acute Toxicity, Mutagenicity, Tumorigenicity                   |
| A10548 | Acute Toxicity                                                 |
| A10549 | Acute Toxicity                                                 |
| A10550 | Acute Toxicity                                                 |
| A10551 | Acute Toxicity, Mutagenicity                                   |
| A10552 | Skin and Eye Irritation                                        |
| A10553 | Tumorigenicity                                                 |
| A10554 | Acute Toxicity                                                 |
| A10555 | Skin and Eye Irritation                                        |
| A10556 | Acute Toxicity, Skin and Eye Irritation, Multiple Dose Effects |
| A10557 | Multiple Dose Effects                                          |
| A10558 | Acute Toxicity                                                 |
| A10559 | Mutagenicity                                                   |
| A10560 | Acute Toxicity                                                 |
| A10561 | Acute Toxicity, Mutagenicity, Tumorigenicity                   |
| A10562 | Acute Toxicity, Reproductive Effects                           |
| A10563 | Acute Toxicity                                                 |
| A10564 | Acute Toxicity                                                 |
| A10565 | Acute Toxicity, Multiple Dose Effects                          |
| A10566 | Acute Toxicity                                                 |
| A10567 | Acute Toxicity                                                 |
| A10568 | Acute Toxicity                                                 |
| A10569 | Acute Toxicity                                                 |
| A10570 | Acute Toxicity                                                 |
| A10571 | Acute Toxicity                                                 |
| A10572 | Acute Toxicity                                                 |
| A10573 | Acute Toxicity, Skin and Eye Irritation                        |
| A10574 | Acute Toxicity                                                 |
| A10575 | Acute Toxicity, Mutagenicity                                   |
| A10576 | Acute Toxicity, Mutagenicity                                   |
| A10577 | Acute Toxicity, Mutagenicity                                   |
| A10578 | Reproductive Effects                                           |
| A10579 | Mutagenicity                                                   |
| A10580 | Reproductive Effects, Multiple Dose Effects                    |
| A10581 | Mutagenicity, Reproductive Effects                             |
| A10582 | Mutagenicity                                                   |
| A10583 | Acute Toxicity, Multiple Dose Effects                          |
| A10584 | Reproductive Effects                                           |
| A10585 | Acute Toxicity                                                 |
| A10586 | Acute Toxicity                                                 |
| A10587 | Acute Toxicity                                                 |
| A10588 | Acute Toxicity                                                 |

|        |                                                                                                    |
|--------|----------------------------------------------------------------------------------------------------|
| A10589 | Acute Toxicity, Mutagenicity, Multiple Dose Effects                                                |
| A10590 | Acute Toxicity, Tumorigenicity                                                                     |
| A10591 | Acute Toxicity, Multiple Dose Effects                                                              |
| A10592 | Acute Toxicity, Multiple Dose Effects                                                              |
| A10593 | Acute Toxicity                                                                                     |
| A10594 | Acute Toxicity, Mutagenicity, Reproductive Effects, Multiple Dose Effects                          |
| A10595 | Acute Toxicity                                                                                     |
| A10596 | Mutagenicity, Tumorigenicity                                                                       |
| A10597 | Mutagenicity                                                                                       |
| A10598 | Acute Toxicity                                                                                     |
| A10599 | Acute Toxicity                                                                                     |
| A10600 | Acute Toxicity, Mutagenicity, Tumorigenicity                                                       |
| A10601 | Non-toxicity                                                                                       |
| A10602 | Mutagenicity                                                                                       |
| A10603 | Mutagenicity, Skin and Eye Irritation                                                              |
| A10604 | Acute Toxicity                                                                                     |
| A10605 | Acute Toxicity                                                                                     |
| A10606 | Acute Toxicity, Mutagenicity, Multiple Dose Effects                                                |
| A10607 | Acute Toxicity, Reproductive Effects                                                               |
| A10608 | Acute Toxicity                                                                                     |
| A10609 | Mutagenicity                                                                                       |
| A10610 | Mutagenicity                                                                                       |
| A10611 | Mutagenicity, Tumorigenicity                                                                       |
| A10612 | Acute Toxicity, Mutagenicity, Skin and Eye Irritation, Reproductive Effects, Multiple Dose Effects |
| A10613 | Mutagenicity, Skin and Eye Irritation                                                              |
| A10614 | Acute Toxicity, Mutagenicity                                                                       |
| A10615 | Acute Toxicity                                                                                     |
| A10616 | Acute Toxicity                                                                                     |
| A10617 | Acute Toxicity, Skin and Eye Irritation                                                            |
| A10618 | Acute Toxicity                                                                                     |
| A10619 | Mutagenicity, Multiple Dose Effects                                                                |
| A10620 | Mutagenicity                                                                                       |
| A10621 | Acute Toxicity, Mutagenicity, Reproductive Effects, Multiple Dose Effects                          |
| A10622 | Acute Toxicity, Multiple Dose Effects                                                              |
| A10623 | Acute Toxicity, Mutagenicity, Reproductive Effects, Multiple Dose Effects                          |
| A10624 | Acute Toxicity                                                                                     |
| A10625 | Non-toxicity                                                                                       |
| A10626 | Acute Toxicity, Mutagenicity, Reproductive Effects                                                 |
| A10627 | Acute Toxicity, Mutagenicity                                                                       |
| A10628 | Mutagenicity, Tumorigenicity                                                                       |
| A10629 | Mutagenicity, Tumorigenicity                                                                       |
| A10630 | Acute Toxicity, Reproductive Effects                                                               |
| A10631 | Acute Toxicity, Multiple Dose Effects                                                              |
| A10632 | Acute Toxicity                                                                                     |
| A10633 | Mutagenicity                                                                                       |

|        |                                                                              |
|--------|------------------------------------------------------------------------------|
| A10634 | Acute Toxicity, Mutagenicity                                                 |
| A10635 | Skin and Eye Irritation                                                      |
| A10636 | Mutagenicity, Tumorigenicity, Multiple Dose Effects                          |
| A10637 | Acute Toxicity                                                               |
| A10638 | Acute Toxicity, Reproductive Effects, Multiple Dose Effects                  |
| A10639 | Mutagenicity, Tumorigenicity                                                 |
| A10640 | Acute Toxicity, Skin and Eye Irritation                                      |
| A10641 | Mutagenicity, Tumorigenicity                                                 |
| A10642 | Acute Toxicity, Mutagenicity, Reproductive Effects, Multiple Dose Effects    |
| A10643 | Tumorigenicity, Multiple Dose Effects                                        |
| A10644 | Skin and Eye Irritation                                                      |
| A10645 | Acute Toxicity, Mutagenicity                                                 |
| A10646 | Acute Toxicity                                                               |
| A10647 | Acute Toxicity, Mutagenicity, Tumorigenicity                                 |
| A10648 | Acute Toxicity, Mutagenicity, Tumorigenicity                                 |
| A10649 | Acute Toxicity                                                               |
| A10650 | Non-toxicity                                                                 |
| A10651 | Acute Toxicity, Mutagenicity, Reproductive Effects, Multiple Dose Effects    |
| A10652 | Acute Toxicity, Skin and Eye Irritation, Multiple Dose Effects               |
| A10653 | Mutagenicity, Tumorigenicity                                                 |
| A10654 | Mutagenicity, Tumorigenicity                                                 |
| A10655 | Reproductive Effects, Multiple Dose Effects                                  |
| A10656 | Reproductive Effects, Multiple Dose Effects                                  |
| A10657 | Acute Toxicity, Multiple Dose Effects                                        |
| A10658 | Acute Toxicity, Multiple Dose Effects                                        |
| A10659 | Acute Toxicity                                                               |
| A10660 | Acute Toxicity                                                               |
| A10661 | Mutagenicity, Tumorigenicity                                                 |
| A10662 | Acute Toxicity, Mutagenicity, Reproductive Effects, Multiple Dose Effects    |
| A10663 | Acute Toxicity, Reproductive Effects                                         |
| A10664 | Acute Toxicity, Skin and Eye Irritation, Reproductive Effects, Multiple Dose |
| A10665 | Mutagenicity                                                                 |
| A10666 | Acute Toxicity                                                               |
| A10667 | Acute Toxicity, Mutagenicity, Tumorigenicity                                 |
| A10668 | Acute Toxicity                                                               |
| A10669 | Acute Toxicity                                                               |
| A10670 | Acute Toxicity, Reproductive Effects, Multiple Dose Effects                  |
| A10671 | Skin and Eye Irritation                                                      |
| A10672 | Acute Toxicity, Multiple Dose Effects                                        |
| A10673 | Acute Toxicity, Multiple Dose Effects                                        |
| A10674 | Acute Toxicity, Reproductive Effects, Multiple Dose Effects                  |
| A10675 | Skin and Eye Irritation                                                      |
| A10676 | Acute Toxicity, Multiple Dose Effects                                        |
| A10677 | Acute Toxicity, Reproductive Effects, Multiple Dose Effects                  |
| A10678 | Acute Toxicity, Mutagenicity, Skin and Eye Irritation                        |
| A10679 | Multiple Dose Effects                                                        |

|        |                                                                              |
|--------|------------------------------------------------------------------------------|
| A10680 | Acute Toxicity                                                               |
| A10681 | Acute Toxicity, Mutagenicity, Skin and Eye Irritation, Multiple Dose Effects |
| A10682 | Mutagenicity, Tumorigenicity                                                 |
| A10683 | Acute Toxicity                                                               |
| A10684 | Acute Toxicity, Reproductive Effects, Multiple Dose Effects                  |
| A10685 | Acute Toxicity, Multiple Dose Effects                                        |
| A10686 | Acute Toxicity                                                               |
| A10687 | Acute Toxicity                                                               |
| A10688 | Acute Toxicity, Skin and Eye Irritation, Reproductive Effects, Multiple Dose |
| A10689 | Acute Toxicity, Multiple Dose Effects                                        |
| A10690 | Acute Toxicity, Reproductive Effects, Multiple Dose Effects                  |
| A10691 | Acute Toxicity, Reproductive Effects, Multiple Dose Effects                  |
| A10692 | Acute Toxicity, Reproductive Effects, Multiple Dose Effects                  |
| A10693 | Acute Toxicity                                                               |
| A10694 | Acute Toxicity, Multiple Dose Effects                                        |
| A10695 | Acute Toxicity, Reproductive Effects                                         |
| A10696 | Acute Toxicity, Reproductive Effects, Multiple Dose Effects                  |
| A10697 | Acute Toxicity, Multiple Dose Effects                                        |
| A10698 | Acute Toxicity                                                               |
| A10699 | Acute Toxicity                                                               |
| A10700 | Reproductive Effects, Multiple Dose Effects                                  |
| A10701 | Acute Toxicity                                                               |
| A10702 | Acute Toxicity, Reproductive Effects, Multiple Dose Effects                  |
| A10703 | Acute Toxicity, Reproductive Effects, Multiple Dose Effects                  |
| A10704 | Acute Toxicity, Tumorigenicity, Reproductive Effects                         |
| A10705 | Acute Toxicity, Multiple Dose Effects                                        |
| A10706 | Acute Toxicity, Skin and Eye Irritation, Multiple Dose Effects               |
| A10707 | Acute Toxicity, Multiple Dose Effects                                        |
| A10708 | Acute Toxicity                                                               |
| A10709 | Acute Toxicity, Multiple Dose Effects                                        |
| A10710 | Acute Toxicity                                                               |
| A10711 | Acute Toxicity                                                               |
| A10712 | Acute Toxicity, Reproductive Effects, Multiple Dose Effects                  |
| A10713 | Tumorigenicity                                                               |
| A10714 | Acute Toxicity, Tumorigenicity, Reproductive Effects, Multiple Dose Effects  |
| A10715 | Acute Toxicity, Mutagenicity                                                 |
| A10716 | Mutagenicity                                                                 |
| A10717 | Reproductive Effects                                                         |
| A10718 | Acute Toxicity                                                               |
| A10719 | Acute Toxicity                                                               |
| A10720 | Acute Toxicity, Skin and Eye Irritation                                      |
| A10721 | Reproductive Effects, Multiple Dose Effects                                  |
| A10722 | Acute Toxicity, Multiple Dose Effects                                        |
| A10723 | Acute Toxicity                                                               |
| A10724 | Mutagenicity                                                                 |
| A10725 | Acute Toxicity                                                               |



|        |                                                                      |
|--------|----------------------------------------------------------------------|
| A10726 | Mutagenicity                                                         |
| A10727 | Non-toxicity                                                         |
| A10728 | Acute Toxicity                                                       |
| A10729 | Mutagenicity                                                         |
| A10730 | Acute Toxicity                                                       |
| A10731 | Acute Toxicity                                                       |
| A10732 | Mutagenicity                                                         |
| A10733 | Non-toxicity                                                         |
| A10734 | Mutagenicity                                                         |
| A10735 | Non-toxicity                                                         |
| A10736 | Mutagenicity                                                         |
| A10737 | Acute Toxicity, Reproductive Effects                                 |
| A10738 | Acute Toxicity, Reproductive Effects                                 |
| A10739 | Reproductive Effects                                                 |
| A10740 | Skin and Eye Irritation, Reproductive Effects, Multiple Dose Effects |
| A10741 | Mutagenicity                                                         |
| A10742 | Mutagenicity                                                         |
| A10743 | Tumorigenicity, Multiple Dose Effects                                |
| A10744 | Mutagenicity                                                         |
| A10745 | Acute Toxicity                                                       |
| A10746 | Acute Toxicity                                                       |
| A10747 | Acute Toxicity                                                       |
| A10748 | Acute Toxicity, Multiple Dose Effects                                |
| A10749 | Acute Toxicity, Mutagenicity                                         |
| A10750 | Acute Toxicity, Mutagenicity, Multiple Dose Effects                  |
| A10751 | Reproductive Effects                                                 |
| A10752 | Mutagenicity                                                         |
| A10753 | Acute Toxicity, Mutagenicity                                         |
| A10754 | Mutagenicity                                                         |
| A10755 | Acute Toxicity                                                       |
| A10756 | Acute Toxicity                                                       |
| A10757 | Acute Toxicity                                                       |
| A10758 | Reproductive Effects, Multiple Dose Effects                          |
| A10759 | Acute Toxicity                                                       |
| A10760 | Acute Toxicity                                                       |
| A10761 | Mutagenicity                                                         |
| A10762 | Mutagenicity                                                         |
| A10763 | Acute Toxicity                                                       |
| A10764 | Acute Toxicity                                                       |
| A10765 | Tumorigenicity                                                       |
| A10766 | Acute Toxicity                                                       |
| A10767 | Acute Toxicity, Mutagenicity, Tumorigenicity                         |
| A10768 | Acute Toxicity, Reproductive Effects, Multiple Dose Effects          |
| A10769 | Mutagenicity, Multiple Dose Effects                                  |
| A10770 | Mutagenicity                                                         |
| A10771 | Mutagenicity, Tumorigenicity                                         |

|        |                                                             |
|--------|-------------------------------------------------------------|
| A10772 | Mutagenicity, Tumorigenicity                                |
| A10773 | Mutagenicity                                                |
| A10774 | Mutagenicity, Tumorigenicity                                |
| A10775 | Mutagenicity, Tumorigenicity                                |
| A10776 | Acute Toxicity                                              |
| A10777 | Acute Toxicity                                              |
| A10778 | Acute Toxicity                                              |
| A10779 | Acute Toxicity, Multiple Dose Effects                       |
| A10780 | Acute Toxicity, Multiple Dose Effects                       |
| A10781 | Acute Toxicity, Reproductive Effects, Multiple Dose Effects |
| A10782 | Multiple Dose Effects                                       |
| A10783 | Acute Toxicity, Reproductive Effects, Multiple Dose Effects |
| A10784 | Acute Toxicity                                              |
| A10785 | Acute Toxicity                                              |
| A10786 | Mutagenicity                                                |
| A10787 | Mutagenicity, Tumorigenicity, Multiple Dose Effects         |
| A10788 | Acute Toxicity, Skin and Eye Irritation                     |
| A10789 | Non-toxicity                                                |
| A10790 | Acute Toxicity                                              |
| A10791 | Acute Toxicity                                              |
| A10792 | Acute Toxicity                                              |
| A10793 | Acute Toxicity                                              |
| A10794 | Reproductive Effects                                        |
| A10795 | Acute Toxicity                                              |
| A10796 | Acute Toxicity                                              |
| A10797 | Acute Toxicity, Multiple Dose Effects                       |
| A10798 | Acute Toxicity                                              |
| A10799 | Acute Toxicity                                              |
| A10800 | Acute Toxicity                                              |
| A10801 | Acute Toxicity                                              |
| A10802 | Acute Toxicity                                              |
| A10803 | Non-toxicity                                                |
| A10804 | Mutagenicity, Multiple Dose Effects                         |
| A10805 | Acute Toxicity                                              |
| A10806 | Acute Toxicity, Reproductive Effects                        |
| A10807 | Reproductive Effects                                        |
| A10808 | Mutagenicity                                                |
| A10809 | Acute Toxicity, Reproductive Effects                        |
| A10810 | Non-toxicity                                                |
| A10811 | Acute Toxicity, Mutagenicity                                |
| A10812 | Non-toxicity                                                |
| A10813 | Non-toxicity                                                |
| A10814 | Acute Toxicity                                              |
| A10815 | Acute Toxicity                                              |
| A10816 | Acute Toxicity                                              |
| A10817 | Acute Toxicity                                              |

|        |                                                                              |
|--------|------------------------------------------------------------------------------|
| A10818 | Acute Toxicity                                                               |
| A10819 | Reproductive Effects                                                         |
| A10820 | Mutagenicity                                                                 |
| A10821 | Acute Toxicity                                                               |
| A10822 | Acute Toxicity                                                               |
| A10823 | Acute Toxicity, Skin and Eye Irritation, Multiple Dose Effects               |
| A10824 | Acute Toxicity                                                               |
| A10825 | Mutagenicity                                                                 |
| A10826 | Skin and Eye Irritation, Multiple Dose Effects                               |
| A10827 | Mutagenicity                                                                 |
| A10828 | Acute Toxicity, Mutagenicity                                                 |
| A10829 | Acute Toxicity                                                               |
| A10830 | Acute Toxicity, Multiple Dose Effects                                        |
| A10831 | Mutagenicity                                                                 |
| A10832 | Acute Toxicity, Mutagenicity, Skin and Eye Irritation                        |
| A10833 | Acute Toxicity                                                               |
| A10834 | Non-toxicity                                                                 |
| A10835 | Mutagenicity                                                                 |
| A10836 | Acute Toxicity, Reproductive Effects                                         |
| A10837 | Acute Toxicity                                                               |
| A10838 | Acute Toxicity, Skin and Eye Irritation                                      |
| A10839 | Mutagenicity                                                                 |
| A10840 | Multiple Dose Effects                                                        |
| A10841 | Mutagenicity                                                                 |
| A10842 | Acute Toxicity, Reproductive Effects, Multiple Dose Effects                  |
| A10843 | Mutagenicity                                                                 |
| A10844 | Acute Toxicity, Mutagenicity, Tumorigenicity                                 |
| A10845 | Multiple Dose Effects                                                        |
| A10846 | Acute Toxicity                                                               |
| A10847 | Acute Toxicity                                                               |
| A10848 | Acute Toxicity, Reproductive Effects, Multiple Dose Effects                  |
| A10849 | Acute Toxicity                                                               |
| A10850 | Acute Toxicity, Mutagenicity, Skin and Eye Irritation, Multiple Dose Effects |
| A10851 | Acute Toxicity, Mutagenicity, Tumorigenicity                                 |
| A10852 | Mutagenicity, Tumorigenicity                                                 |
| A10853 | Acute Toxicity, Reproductive Effects                                         |
| A10854 | Acute Toxicity, Mutagenicity                                                 |
| A10855 | Acute Toxicity                                                               |
| A10856 | Acute Toxicity, Mutagenicity, Tumorigenicity                                 |
| A10857 | Mutagenicity                                                                 |
| A10858 | Mutagenicity                                                                 |
| A10859 | Reproductive Effects                                                         |
| A10860 | Acute Toxicity                                                               |
| A10861 | Acute Toxicity, Mutagenicity, Tumorigenicity                                 |
| A10862 | Mutagenicity                                                                 |
| A10863 | Acute Toxicity                                                               |

|        |                                                                             |
|--------|-----------------------------------------------------------------------------|
| A10864 | Tumorigenicity                                                              |
| A10865 | Mutagenicity                                                                |
| A10866 | Acute Toxicity, Reproductive Effects, Multiple Dose Effects                 |
| A10867 | Acute Toxicity, Multiple Dose Effects                                       |
| A10868 | Acute Toxicity, Skin and Eye Irritation, Reproductive Effects               |
| A10869 | Acute Toxicity, Mutagenicity, Reproductive Effects, Multiple Dose Effects   |
| A10870 | Acute Toxicity, Mutagenicity                                                |
| A10871 | Acute Toxicity                                                              |
| A10872 | Mutagenicity                                                                |
| A10873 | Acute Toxicity, Skin and Eye Irritation, Reproductive Effects               |
| A10874 | Acute Toxicity, Mutagenicity, Skin and Eye Irritation, Reproductive Effects |
| A10875 | Acute Toxicity, Reproductive Effects, Multiple Dose Effects                 |
| A10876 | Acute Toxicity, Reproductive Effects, Multiple Dose Effects                 |
| A10877 | Acute Toxicity, Skin and Eye Irritation                                     |
| A10878 | Acute Toxicity                                                              |
| A10879 | Acute Toxicity                                                              |
| A10880 | Multiple Dose Effects                                                       |
| A10881 | Acute Toxicity                                                              |
| A10882 | Multiple Dose Effects                                                       |
| A10883 | Acute Toxicity                                                              |
| A10884 | Acute Toxicity                                                              |
| A10885 | Acute Toxicity, Multiple Dose Effects                                       |
| A10886 | Reproductive Effects, Multiple Dose Effects                                 |
| A10887 | Acute Toxicity, Mutagenicity                                                |
| A10888 | Multiple Dose Effects                                                       |
| A10889 | Acute Toxicity                                                              |
| A10890 | Acute Toxicity                                                              |
| A10891 | Mutagenicity                                                                |
| A10892 | Acute Toxicity                                                              |
| A10893 | Acute Toxicity                                                              |
| A10894 | Acute Toxicity                                                              |
| A10895 | Acute Toxicity                                                              |
| A10896 | Acute Toxicity                                                              |
| A10897 | Acute Toxicity, Mutagenicity, Reproductive Effects                          |
| A10898 | Acute Toxicity                                                              |
| A10899 | Reproductive Effects                                                        |
| A10900 | Mutagenicity                                                                |
| A10901 | Acute Toxicity                                                              |
| A10902 | Acute Toxicity                                                              |
| A10903 | Acute Toxicity                                                              |
| A10904 | Acute Toxicity, Skin and Eye Irritation, Multiple Dose Effects              |
| A10905 | Skin and Eye Irritation                                                     |
| A10906 | Mutagenicity                                                                |
| A10907 | Acute Toxicity                                                              |
| A10908 | Acute Toxicity, Skin and Eye Irritation                                     |
| A10909 | Multiple Dose Effects                                                       |

|        |                                                                              |
|--------|------------------------------------------------------------------------------|
| A10910 | Acute Toxicity, Reproductive Effects, Multiple Dose Effects                  |
| A10911 | Acute Toxicity, Multiple Dose Effects                                        |
| A10912 | Acute Toxicity                                                               |
| A10913 | Acute Toxicity                                                               |
| A10914 | Tumorigenicity                                                               |
| A10915 | Acute Toxicity                                                               |
| A10916 | Non-toxicity                                                                 |
| A10917 | Acute Toxicity                                                               |
| A10918 | Acute Toxicity, Mutagenicity, Multiple Dose Effects                          |
| A10919 | Acute Toxicity                                                               |
| A10920 | Acute Toxicity                                                               |
| A10921 | Acute Toxicity, Mutagenicity                                                 |
| A10922 | Acute Toxicity, Multiple Dose Effects                                        |
| A10923 | Skin and Eye Irritation                                                      |
| A10924 | Acute Toxicity                                                               |
| A10925 | Acute Toxicity, Reproductive Effects, Multiple Dose Effects                  |
| A10926 | Reproductive Effects, Multiple Dose Effects                                  |
| A10927 | Mutagenicity                                                                 |
| A10928 | Acute Toxicity                                                               |
| A10929 | Mutagenicity                                                                 |
| A10930 | Skin and Eye Irritation                                                      |
| A10931 | Mutagenicity                                                                 |
| A10932 | Mutagenicity                                                                 |
| A10933 | Acute Toxicity, Skin and Eye Irritation, Reproductive Effects, Multiple Dose |
| A10934 | Acute Toxicity                                                               |
| A10935 | Acute Toxicity                                                               |
| A10936 | Acute Toxicity                                                               |
| A10937 | Acute Toxicity                                                               |
| A10938 | Acute Toxicity                                                               |
| A10939 | Acute Toxicity                                                               |
| A10940 | Acute Toxicity, Mutagenicity                                                 |
| A10941 | Acute Toxicity                                                               |
| A10942 | Mutagenicity                                                                 |
| A10943 | Mutagenicity                                                                 |
| A10944 | Acute Toxicity, Skin and Eye Irritation                                      |
| A10945 | Mutagenicity                                                                 |
| A10946 | Mutagenicity                                                                 |
| A10947 | Reproductive Effects, Multiple Dose Effects                                  |
| A10948 | Mutagenicity                                                                 |
| A10949 | Acute Toxicity                                                               |
| A10950 | Acute Toxicity                                                               |
| A10951 | Mutagenicity                                                                 |
| A10952 | Acute Toxicity                                                               |
| A10953 | Acute Toxicity                                                               |
| A10954 | Mutagenicity                                                                 |
| A10955 | Acute Toxicity                                                               |

|        |                                                                           |
|--------|---------------------------------------------------------------------------|
| A10956 | Acute Toxicity                                                            |
| A10957 | Acute Toxicity                                                            |
| A10958 | Acute Toxicity                                                            |
| A10959 | Mutagenicity                                                              |
| A10960 | Acute Toxicity                                                            |
| A10961 | Non-toxicity                                                              |
| A10962 | Mutagenicity                                                              |
| A10963 | Acute Toxicity                                                            |
| A10964 | Acute Toxicity                                                            |
| A10965 | Acute Toxicity, Multiple Dose Effects                                     |
| A10966 | Acute Toxicity, Multiple Dose Effects                                     |
| A10967 | Acute Toxicity, Mutagenicity, Reproductive Effects, Multiple Dose Effects |
| A10968 | Acute Toxicity                                                            |
| A10969 | Acute Toxicity                                                            |
| A10970 | Acute Toxicity                                                            |
| A10971 | Acute Toxicity                                                            |
| A10972 | Acute Toxicity                                                            |
| A10973 | Acute Toxicity                                                            |
| A10974 | Mutagenicity, Tumorigenicity                                              |
| A10975 | Acute Toxicity                                                            |
| A10976 | Acute Toxicity                                                            |
| A10977 | Acute Toxicity                                                            |
| A10978 | Acute Toxicity                                                            |
| A10979 | Acute Toxicity, Skin and Eye Irritation                                   |
| A10980 | Acute Toxicity                                                            |
| A10981 | Acute Toxicity                                                            |
| A10982 | Acute Toxicity                                                            |
| A10983 | Acute Toxicity                                                            |
| A10984 | Acute Toxicity                                                            |
| A10985 | Acute Toxicity                                                            |
| A10986 | Acute Toxicity                                                            |
| A10987 | Acute Toxicity, Mutagenicity                                              |
| A10988 | Acute Toxicity, Mutagenicity, Tumorigenicity                              |
| A10989 | Mutagenicity                                                              |
| A10990 | Acute Toxicity                                                            |
| A10991 | Mutagenicity                                                              |
| A10992 | Acute Toxicity, Mutagenicity                                              |
| A10993 | Acute Toxicity, Mutagenicity                                              |
| A10994 | Acute Toxicity                                                            |
| A10995 | Acute Toxicity                                                            |
| A10996 | Tumorigenicity                                                            |
| A10997 | Acute Toxicity                                                            |
| A10998 | Mutagenicity                                                              |
| A10999 | Acute Toxicity                                                            |
| A11000 | Acute Toxicity, Multiple Dose Effects                                     |
| A11001 | Acute Toxicity                                                            |

|        |                                                    |
|--------|----------------------------------------------------|
| A11002 | Acute Toxicity                                     |
| A11003 | Acute Toxicity                                     |
| A11004 | Acute Toxicity                                     |
| A11005 | Mutagenicity, Tumorigenicity                       |
| A11006 | Acute Toxicity                                     |
| A11007 | Acute Toxicity                                     |
| A11008 | Mutagenicity                                       |
| A11009 | Acute Toxicity                                     |
| A11010 | Reproductive Effects                               |
| A11011 | Mutagenicity                                       |
| A11012 | Mutagenicity, Tumorigenicity                       |
| A11013 | Acute Toxicity                                     |
| A11014 | Mutagenicity                                       |
| A11015 | Reproductive Effects                               |
| A11016 | Acute Toxicity                                     |
| A11017 | Acute Toxicity                                     |
| A11018 | Mutagenicity                                       |
| A11019 | Acute Toxicity                                     |
| A11020 | Mutagenicity, Tumorigenicity                       |
| A11021 | Mutagenicity                                       |
| A11022 | Acute Toxicity, Mutagenicity, Reproductive Effects |
| A11023 | Acute Toxicity, Mutagenicity                       |
| A11024 | Acute Toxicity                                     |
| A11025 | Mutagenicity, Tumorigenicity                       |
| A11026 | Mutagenicity                                       |
| A11027 | Mutagenicity, Multiple Dose Effects                |
| A11028 | Mutagenicity                                       |
| A11029 | Acute Toxicity                                     |
| A11030 | Reproductive Effects                               |
| A11031 | Mutagenicity                                       |
| A11032 | Multiple Dose Effects                              |
| A11033 | Acute Toxicity, Mutagenicity                       |
| A11034 | Mutagenicity                                       |
| A11035 | Acute Toxicity                                     |
| A11036 | Mutagenicity, Tumorigenicity                       |
| A11037 | Acute Toxicity                                     |
| A11038 | Acute Toxicity, Mutagenicity                       |
| A11039 | Mutagenicity                                       |
| A11040 | Mutagenicity                                       |
| A11041 | Acute Toxicity                                     |
| A11042 | Acute Toxicity                                     |
| A11043 | Acute Toxicity                                     |
| A11044 | Mutagenicity                                       |
| A11045 | Acute Toxicity                                     |
| A11046 | Mutagenicity                                       |
| A11047 | Acute Toxicity                                     |

|        |                                         |
|--------|-----------------------------------------|
| A11048 | Mutagenicity                            |
| A11049 | Mutagenicity, Tumorigenicity            |
| A11050 | Acute Toxicity                          |
| A11051 | Acute Toxicity                          |
| A11052 | Acute Toxicity                          |
| A11053 | Mutagenicity                            |
| A11054 | Mutagenicity                            |
| A11055 | Acute Toxicity, Mutagenicity            |
| A11056 | Mutagenicity                            |
| A11057 | Acute Toxicity                          |
| A11058 | Mutagenicity                            |
| A11059 | Mutagenicity                            |
| A11060 | Acute Toxicity                          |
| A11061 | Acute Toxicity                          |
| A11062 | Acute Toxicity, Multiple Dose Effects   |
| A11063 | Skin and Eye Irritation                 |
| A11064 | Non-toxicity                            |
| A11065 | Acute Toxicity                          |
| A11066 | Mutagenicity                            |
| A11067 | Acute Toxicity                          |
| A11068 | Mutagenicity                            |
| A11069 | Mutagenicity                            |
| A11070 | Mutagenicity                            |
| A11071 | Acute Toxicity                          |
| A11072 | Mutagenicity, Multiple Dose Effects     |
| A11073 | Mutagenicity                            |
| A11074 | Acute Toxicity                          |
| A11075 | Acute Toxicity                          |
| A11076 | Reproductive Effects                    |
| A11077 | Acute Toxicity                          |
| A11078 | Acute Toxicity                          |
| A11079 | Acute Toxicity                          |
| A11080 | Acute Toxicity                          |
| A11081 | Mutagenicity                            |
| A11082 | Mutagenicity                            |
| A11083 | Tumorigenicity                          |
| A11084 | Acute Toxicity, Skin and Eye Irritation |
| A11085 | Acute Toxicity                          |
| A11086 | Acute Toxicity, Multiple Dose Effects   |
| A11087 | Acute Toxicity                          |
| A11088 | Reproductive Effects                    |
| A11089 | Tumorigenicity                          |
| A11090 | Mutagenicity                            |
| A11091 | Mutagenicity                            |
| A11092 | Acute Toxicity, Mutagenicity            |
| A11093 | Acute Toxicity                          |



|        |                                       |
|--------|---------------------------------------|
| A11094 | Acute Toxicity                        |
| A11095 | Acute Toxicity                        |
| A11096 | Acute Toxicity                        |
| A11097 | Acute Toxicity                        |
| A11098 | Acute Toxicity                        |
| A11099 | Acute Toxicity                        |
| A11100 | Acute Toxicity                        |
| A11101 | Acute Toxicity, Mutagenicity          |
| A11102 | Acute Toxicity                        |
| A11103 | Mutagenicity, Tumorigenicity          |
| A11104 | Mutagenicity                          |
| A11105 | Acute Toxicity                        |
| A11106 | Acute Toxicity                        |
| A11107 | Mutagenicity                          |
| A11108 | Non-toxicity                          |
| A11109 | Acute Toxicity                        |
| A11110 | Acute Toxicity                        |
| A11111 | Mutagenicity                          |
| A11112 | Acute Toxicity                        |
| A11113 | Acute Toxicity                        |
| A11114 | Acute Toxicity                        |
| A11115 | Acute Toxicity                        |
| A11116 | Acute Toxicity                        |
| A11117 | Acute Toxicity                        |
| A11118 | Acute Toxicity, Multiple Dose Effects |
| A11119 | Acute Toxicity                        |
| A11120 | Acute Toxicity                        |
| A11121 | Acute Toxicity, Mutagenicity          |
| A11122 | Acute Toxicity                        |
| A11123 | Non-toxicity                          |
| A11124 | Acute Toxicity                        |
| A11125 | Acute Toxicity                        |
| A11126 | Acute Toxicity                        |
| A11127 | Mutagenicity                          |
| A11128 | Mutagenicity                          |
| A11129 | Non-toxicity                          |
| A11130 | Reproductive Effects                  |
| A11131 | Acute Toxicity, Mutagenicity          |
| A11132 | Acute Toxicity, Multiple Dose Effects |
| A11133 | Tumorigenicity                        |
| A11134 | Acute Toxicity                        |
| A11135 | Mutagenicity                          |
| A11136 | Tumorigenicity                        |
| A11137 | Acute Toxicity                        |
| A11138 | Mutagenicity                          |
| A11139 | Acute Toxicity                        |

|        |                                                       |
|--------|-------------------------------------------------------|
| A11140 | Acute Toxicity, Mutagenicity                          |
| A11141 | Acute Toxicity                                        |
| A11142 | Acute Toxicity                                        |
| A11143 | Mutagenicity                                          |
| A11144 | Acute Toxicity, Skin and Eye Irritation               |
| A11145 | Acute Toxicity                                        |
| A11146 | Acute Toxicity                                        |
| A11147 | Non-toxicity                                          |
| A11148 | Non-toxicity                                          |
| A11149 | Acute Toxicity, Mutagenicity                          |
| A11150 | Acute Toxicity                                        |
| A11151 | Acute Toxicity                                        |
| A11152 | Acute Toxicity                                        |
| A11153 | Acute Toxicity, Reproductive Effects                  |
| A11154 | Mutagenicity                                          |
| A11155 | Acute Toxicity                                        |
| A11156 | Multiple Dose Effects                                 |
| A11157 | Acute Toxicity                                        |
| A11158 | Acute Toxicity, Tumorigenicity, Multiple Dose Effects |
| A11159 | Multiple Dose Effects                                 |
| A11160 | Acute Toxicity, Mutagenicity                          |
| A11161 | Mutagenicity                                          |
| A11162 | Acute Toxicity                                        |
| A11163 | Acute Toxicity                                        |
| A11164 | Tumorigenicity                                        |
| A11165 | Acute Toxicity                                        |
| A11166 | Acute Toxicity, Mutagenicity                          |
| A11167 | Acute Toxicity, Mutagenicity                          |
| A11168 | Mutagenicity, Multiple Dose Effects                   |
| A11169 | Acute Toxicity                                        |
| A11170 | Non-toxicity                                          |
| A11171 | Mutagenicity                                          |
| A11172 | Mutagenicity, Tumorigenicity                          |
| A11173 | Mutagenicity                                          |
| A11174 | Acute Toxicity                                        |
| A11175 | Acute Toxicity                                        |
| A11176 | Acute Toxicity                                        |
| A11177 | Acute Toxicity, Mutagenicity                          |
| A11178 | Mutagenicity                                          |
| A11179 | Mutagenicity                                          |
| A11180 | Acute Toxicity, Mutagenicity, Multiple Dose Effects   |
| A11181 | Mutagenicity                                          |
| A11182 | Reproductive Effects                                  |
| A11183 | Mutagenicity                                          |
| A11184 | Acute Toxicity                                        |
| A11185 | Acute Toxicity, Mutagenicity                          |

|        |                                                                           |
|--------|---------------------------------------------------------------------------|
| A11186 | Acute Toxicity                                                            |
| A11187 | Mutagenicity                                                              |
| A11188 | Acute Toxicity, Mutagenicity, Reproductive Effects                        |
| A11189 | Acute Toxicity, Multiple Dose Effects                                     |
| A11190 | Acute Toxicity                                                            |
| A11191 | Tumorigenicity, Multiple Dose Effects                                     |
| A11192 | Mutagenicity                                                              |
| A11193 | Acute Toxicity, Reproductive Effects, Multiple Dose Effects               |
| A11194 | Mutagenicity                                                              |
| A11195 | Reproductive Effects                                                      |
| A11196 | Acute Toxicity, Mutagenicity                                              |
| A11197 | Acute Toxicity                                                            |
| A11198 | Mutagenicity                                                              |
| A11199 | Acute Toxicity                                                            |
| A11200 | Acute Toxicity, Multiple Dose Effects                                     |
| A11201 | Mutagenicity                                                              |
| A11202 | Multiple Dose Effects                                                     |
| A11203 | Mutagenicity                                                              |
| A11204 | Acute Toxicity                                                            |
| A11205 | Acute Toxicity, Mutagenicity, Reproductive Effects, Multiple Dose Effects |
| A11206 | Non-toxicity                                                              |
| A11207 | Mutagenicity                                                              |
| A11208 | Mutagenicity                                                              |
| A11209 | Acute Toxicity                                                            |
| A11210 | Acute Toxicity                                                            |
| A11211 | Acute Toxicity, Mutagenicity                                              |
| A11212 | Skin and Eye Irritation                                                   |
| A11213 | Acute Toxicity                                                            |
| A11214 | Mutagenicity                                                              |
| A11215 | Mutagenicity                                                              |
| A11216 | Mutagenicity                                                              |
| A11217 | Acute Toxicity                                                            |
| A11218 | Acute Toxicity                                                            |
| A11219 | Acute Toxicity                                                            |
| A11220 | Acute Toxicity                                                            |
| A11221 | Acute Toxicity                                                            |
| A11222 | Mutagenicity                                                              |
| A11223 | Mutagenicity                                                              |
| A11224 | Acute Toxicity                                                            |
| A11225 | Mutagenicity                                                              |
| A11226 | Acute Toxicity                                                            |
| A11227 | Reproductive Effects                                                      |
| A11228 | Multiple Dose Effects                                                     |
| A11229 | Multiple Dose Effects                                                     |
| A11230 | Acute Toxicity                                                            |
| A11231 | Acute Toxicity                                                            |

|        |                                                             |
|--------|-------------------------------------------------------------|
| A11232 | Acute Toxicity                                              |
| A11233 | Acute Toxicity, Mutagenicity                                |
| A11234 | Multiple Dose Effects                                       |
| A11235 | Acute Toxicity, Multiple Dose Effects                       |
| A11236 | Mutagenicity, Multiple Dose Effects                         |
| A11237 | Acute Toxicity, Reproductive Effects                        |
| A11238 | Acute Toxicity, Skin and Eye Irritation                     |
| A11239 | Acute Toxicity                                              |
| A11240 | Acute Toxicity                                              |
| A11241 | Tumorigenicity                                              |
| A11242 | Acute Toxicity                                              |
| A11243 | Skin and Eye Irritation                                     |
| A11244 | Acute Toxicity                                              |
| A11245 | Acute Toxicity                                              |
| A11246 | Acute Toxicity                                              |
| A11247 | Acute Toxicity, Reproductive Effects                        |
| A11248 | Acute Toxicity                                              |
| A11249 | Acute Toxicity, Multiple Dose Effects                       |
| A11250 | Non-toxicity                                                |
| A11251 | Reproductive Effects                                        |
| A11252 | Multiple Dose Effects                                       |
| A11253 | Acute Toxicity, Reproductive Effects                        |
| A11254 | Acute Toxicity                                              |
| A11255 | Acute Toxicity                                              |
| A11256 | Acute Toxicity                                              |
| A11257 | Acute Toxicity                                              |
| A11258 | Tumorigenicity                                              |
| A11259 | Acute Toxicity                                              |
| A11260 | Acute Toxicity                                              |
| A11261 | Acute Toxicity                                              |
| A11262 | Acute Toxicity                                              |
| A11263 | Acute Toxicity                                              |
| A11264 | Acute Toxicity                                              |
| A11265 | Acute Toxicity, Multiple Dose Effects                       |
| A11266 | Acute Toxicity, Reproductive Effects                        |
| A11267 | Tumorigenicity                                              |
| A11268 | Acute Toxicity                                              |
| A11269 | Acute Toxicity                                              |
| A11270 | Acute Toxicity                                              |
| A11271 | Acute Toxicity                                              |
| A11272 | Acute Toxicity                                              |
| A11273 | Acute Toxicity                                              |
| A11274 | Mutagenicity                                                |
| A11275 | Acute Toxicity                                              |
| A11276 | Acute Toxicity, Mutagenicity, Skin and Eye Irritation       |
| A11277 | Acute Toxicity, Reproductive Effects, Multiple Dose Effects |

|        |                                                                           |
|--------|---------------------------------------------------------------------------|
| A11278 | Mutagenicity, Tumorigenicity                                              |
| A11279 | Acute Toxicity, Mutagenicity, Tumorigenicity, Reproductive Effects,       |
| A11280 | Mutagenicity, Tumorigenicity                                              |
| A11281 | Mutagenicity                                                              |
| A11282 | Mutagenicity                                                              |
| A11283 | Non-toxicity                                                              |
| A11284 | Acute Toxicity, Mutagenicity, Reproductive Effects, Multiple Dose Effects |
| A11285 | Acute Toxicity, Mutagenicity, Tumorigenicity, Multiple Dose Effects       |
| A11286 | Acute Toxicity                                                            |
| A11287 | Acute Toxicity, Mutagenicity                                              |
| A11288 | Acute Toxicity, Multiple Dose Effects                                     |
| A11289 | Mutagenicity, Tumorigenicity                                              |
| A11290 | Acute Toxicity, Multiple Dose Effects                                     |
| A11291 | Acute Toxicity, Multiple Dose Effects                                     |
| A11292 | Acute Toxicity, Mutagenicity, Multiple Dose Effects                       |
| A11293 | Acute Toxicity, Mutagenicity                                              |
| A11294 | Mutagenicity                                                              |
| A11295 | Multiple Dose Effects                                                     |
| A11296 | Acute Toxicity, Multiple Dose Effects                                     |
| A11297 | Acute Toxicity, Multiple Dose Effects                                     |
| A11298 | Mutagenicity                                                              |
| A11299 | Mutagenicity, Tumorigenicity                                              |
| A11300 | Acute Toxicity, Mutagenicity                                              |
| A11301 | Acute Toxicity, Reproductive Effects, Multiple Dose Effects               |
| A11302 | Acute Toxicity                                                            |
| A11303 | Acute Toxicity, Reproductive Effects                                      |
| A11304 | Acute Toxicity, Mutagenicity, Multiple Dose Effects                       |
| A11305 | Mutagenicity, Tumorigenicity                                              |
| A11306 | Mutagenicity                                                              |
| A11307 | Acute Toxicity                                                            |
| A11308 | Acute Toxicity, Mutagenicity, Tumorigenicity                              |
| A11309 | Acute Toxicity, Mutagenicity, Tumorigenicity, Reproductive Effects,       |
| A11310 | Mutagenicity, Tumorigenicity                                              |
| A11311 | Acute Toxicity, Mutagenicity, Reproductive Effects, Multiple Dose Effects |
| A11312 | Acute Toxicity, Multiple Dose Effects                                     |
| A11313 | Mutagenicity, Tumorigenicity                                              |
| A11314 | Mutagenicity                                                              |
| A11315 | Mutagenicity, Tumorigenicity                                              |
| A11316 | Acute Toxicity, Multiple Dose Effects                                     |
| A11317 | Mutagenicity, Tumorigenicity                                              |
| A11318 | Mutagenicity, Tumorigenicity                                              |
| A11319 | Mutagenicity                                                              |
| A11320 | Mutagenicity, Tumorigenicity                                              |
| A11321 | Mutagenicity                                                              |
| A11322 | Acute Toxicity, Reproductive Effects                                      |
| A11323 | Acute Toxicity                                                            |

|        |                                                                     |
|--------|---------------------------------------------------------------------|
| A11324 | Acute Toxicity                                                      |
| A11325 | Acute Toxicity, Multiple Dose Effects                               |
| A11326 | Acute Toxicity, Multiple Dose Effects                               |
| A11327 | Acute Toxicity, Mutagenicity                                        |
| A11328 | Mutagenicity                                                        |
| A11329 | Tumorigenicity                                                      |
| A11330 | Acute Toxicity, Mutagenicity, Tumorigenicity, Multiple Dose Effects |
| A11331 | Acute Toxicity                                                      |
| A11332 | Mutagenicity                                                        |
| A11333 | Mutagenicity                                                        |
| A11334 | Acute Toxicity                                                      |
| A11335 | Mutagenicity                                                        |
| A11336 | Mutagenicity, Tumorigenicity                                        |
| A11337 | Acute Toxicity, Multiple Dose Effects                               |
| A11338 | Acute Toxicity                                                      |
| A11339 | Mutagenicity, Tumorigenicity, Multiple Dose Effects                 |
| A11340 | Mutagenicity                                                        |
| A11341 | Mutagenicity                                                        |
| A11342 | Mutagenicity                                                        |
| A11343 | Tumorigenicity                                                      |
| A11344 | Acute Toxicity                                                      |
| A11345 | Acute Toxicity                                                      |
| A11346 | Mutagenicity, Reproductive Effects                                  |
| A11347 | Acute Toxicity, Mutagenicity                                        |
| A11348 | Mutagenicity, Tumorigenicity                                        |
| A11349 | Acute Toxicity                                                      |
| A11350 | Acute Toxicity                                                      |
| A11351 | Acute Toxicity                                                      |
| A11352 | Acute Toxicity                                                      |
| A11353 | Tumorigenicity                                                      |
| A11354 | Acute Toxicity, Skin and Eye Irritation                             |
| A11355 | Acute Toxicity                                                      |
| A11356 | Acute Toxicity                                                      |
| A11357 | Acute Toxicity                                                      |
| A11358 | Acute Toxicity                                                      |
| A11359 | Acute Toxicity                                                      |
| A11360 | Multiple Dose Effects                                               |
| A11361 | Acute Toxicity, Skin and Eye Irritation                             |
| A11362 | Acute Toxicity                                                      |
| A11363 | Non-toxicity                                                        |
| A11364 | Acute Toxicity                                                      |
| A11365 | Acute Toxicity                                                      |
| A11366 | Mutagenicity                                                        |
| A11367 | Acute Toxicity, Mutagenicity                                        |
| A11368 | Acute Toxicity                                                      |
| A11369 | Acute Toxicity                                                      |

|        |                                                                     |
|--------|---------------------------------------------------------------------|
| A11370 | Acute Toxicity, Multiple Dose Effects                               |
| A11371 | Reproductive Effects, Multiple Dose Effects                         |
| A11372 | Acute Toxicity                                                      |
| A11373 | Non-toxicity                                                        |
| A11374 | Acute Toxicity                                                      |
| A11375 | Mutagenicity, Tumorigenicity                                        |
| A11376 | Acute Toxicity                                                      |
| A11377 | Mutagenicity                                                        |
| A11378 | Mutagenicity                                                        |
| A11379 | Acute Toxicity, Mutagenicity                                        |
| A11380 | Acute Toxicity                                                      |
| A11381 | Acute Toxicity, Reproductive Effects, Multiple Dose Effects         |
| A11382 | Mutagenicity, Tumorigenicity                                        |
| A11383 | Acute Toxicity, Tumorigenicity                                      |
| A11384 | Acute Toxicity, Multiple Dose Effects                               |
| A11385 | Acute Toxicity, Mutagenicity                                        |
| A11386 | Acute Toxicity                                                      |
| A11387 | Mutagenicity                                                        |
| A11388 | Mutagenicity                                                        |
| A11389 | Mutagenicity                                                        |
| A11390 | Acute Toxicity                                                      |
| A11391 | Mutagenicity, Tumorigenicity                                        |
| A11392 | Reproductive Effects                                                |
| A11393 | Acute Toxicity                                                      |
| A11394 | Acute Toxicity, Mutagenicity, Multiple Dose Effects                 |
| A11395 | Acute Toxicity, Reproductive Effects, Multiple Dose Effects         |
| A11396 | Mutagenicity, Tumorigenicity                                        |
| A11397 | Multiple Dose Effects                                               |
| A11398 | Mutagenicity                                                        |
| A11399 | Multiple Dose Effects                                               |
| A11400 | Non-toxicity                                                        |
| A11401 | Acute Toxicity                                                      |
| A11402 | Mutagenicity                                                        |
| A11403 | Acute Toxicity                                                      |
| A11404 | Acute Toxicity                                                      |
| A11405 | Mutagenicity                                                        |
| A11406 | Skin and Eye Irritation                                             |
| A11407 | Acute Toxicity                                                      |
| A11408 | Acute Toxicity, Mutagenicity, Tumorigenicity, Multiple Dose Effects |
| A11409 | Acute Toxicity                                                      |
| A11410 | Non-toxicity                                                        |
| A11411 | Tumorigenicity                                                      |
| A11412 | Mutagenicity                                                        |
| A11413 | Mutagenicity, Tumorigenicity                                        |
| A11414 | Acute Toxicity                                                      |
| A11415 | Acute Toxicity, Multiple Dose Effects                               |

|        |                                                             |
|--------|-------------------------------------------------------------|
| A11416 | Acute Toxicity, Multiple Dose Effects                       |
| A11417 | Mutagenicity, Tumorigenicity                                |
| A11418 | Mutagenicity                                                |
| A11419 | Acute Toxicity                                              |
| A11420 | Acute Toxicity, Multiple Dose Effects                       |
| A11421 | Acute Toxicity, Tumorigenicity, Multiple Dose Effects       |
| A11422 | Mutagenicity                                                |
| A11423 | Mutagenicity                                                |
| A11424 | Acute Toxicity, Mutagenicity                                |
| A11425 | Acute Toxicity                                              |
| A11426 | Mutagenicity, Tumorigenicity                                |
| A11427 | Acute Toxicity                                              |
| A11428 | Acute Toxicity, Mutagenicity                                |
| A11429 | Acute Toxicity                                              |
| A11430 | Acute Toxicity, Reproductive Effects, Multiple Dose Effects |
| A11431 | Acute Toxicity, Tumorigenicity                              |
| A11432 | Acute Toxicity, Mutagenicity                                |
| A11433 | Acute Toxicity                                              |
| A11434 | Acute Toxicity, Mutagenicity, Reproductive Effects          |
| A11435 | Mutagenicity                                                |
| A11436 | Acute Toxicity, Mutagenicity, Multiple Dose Effects         |
| A11437 | Mutagenicity, Tumorigenicity                                |
| A11438 | Acute Toxicity                                              |
| A11439 | Acute Toxicity                                              |
| A11440 | Acute Toxicity                                              |
| A11441 | Mutagenicity, Tumorigenicity                                |
| A11442 | Reproductive Effects                                        |
| A11443 | Multiple Dose Effects                                       |
| A11444 | Mutagenicity                                                |
| A11445 | Mutagenicity                                                |
| A11446 | Mutagenicity                                                |
| A11447 | Mutagenicity                                                |
| A11448 | Multiple Dose Effects                                       |
| A11449 | Mutagenicity                                                |
| A11450 | Mutagenicity, Tumorigenicity                                |
| A11451 | Acute Toxicity, Reproductive Effects, Multiple Dose Effects |
| A11452 | Acute Toxicity                                              |
| A11453 | Acute Toxicity, Reproductive Effects                        |
| A11454 | Mutagenicity, Tumorigenicity, Multiple Dose Effects         |
| A11455 | Acute Toxicity, Mutagenicity                                |
| A11456 | Reproductive Effects                                        |
| A11457 | Mutagenicity                                                |
| A11458 | Mutagenicity                                                |
| A11459 | Acute Toxicity                                              |
| A11460 | Acute Toxicity, Mutagenicity                                |
| A11461 | Mutagenicity                                                |



|        |                                                                              |
|--------|------------------------------------------------------------------------------|
| A11462 | Acute Toxicity                                                               |
| A11463 | Mutagenicity                                                                 |
| A11464 | Mutagenicity, Tumorigenicity                                                 |
| A11465 | Mutagenicity                                                                 |
| A11466 | Mutagenicity                                                                 |
| A11467 | Mutagenicity                                                                 |
| A11468 | Mutagenicity                                                                 |
| A11469 | Acute Toxicity, Multiple Dose Effects                                        |
| A11470 | Multiple Dose Effects                                                        |
| A11471 | Acute Toxicity, Multiple Dose Effects                                        |
| A11472 | Non-toxicity                                                                 |
| A11473 | Acute Toxicity, Multiple Dose Effects                                        |
| A11474 | Acute Toxicity                                                               |
| A11475 | Acute Toxicity, Mutagenicity, Multiple Dose Effects                          |
| A11476 | Acute Toxicity, Multiple Dose Effects                                        |
| A11477 | Acute Toxicity, Mutagenicity, Multiple Dose Effects                          |
| A11478 | Mutagenicity                                                                 |
| A11479 | Multiple Dose Effects                                                        |
| A11480 | Acute Toxicity                                                               |
| A11481 | Mutagenicity, Tumorigenicity                                                 |
| A11482 | Acute Toxicity, Mutagenicity                                                 |
| A11483 | Mutagenicity, Tumorigenicity                                                 |
| A11484 | Mutagenicity                                                                 |
| A11485 | Acute Toxicity, Mutagenicity, Multiple Dose Effects                          |
| A11486 | Non-toxicity                                                                 |
| A11487 | Acute Toxicity, Tumorigenicity, Reproductive Effects, Multiple Dose Effects  |
| A11488 | Skin and Eye Irritation, Multiple Dose Effects                               |
| A11489 | Acute Toxicity                                                               |
| A11490 | Mutagenicity                                                                 |
| A11491 | Mutagenicity                                                                 |
| A11492 | Non-toxicity                                                                 |
| A11493 | Acute Toxicity, Mutagenicity                                                 |
| A11494 | Acute Toxicity                                                               |
| A11495 | Acute Toxicity                                                               |
| A11496 | Multiple Dose Effects                                                        |
| A11497 | Acute Toxicity, Multiple Dose Effects                                        |
| A11498 | Mutagenicity                                                                 |
| A11499 | Acute Toxicity, Mutagenicity, Skin and Eye Irritation                        |
| A11500 | Acute Toxicity                                                               |
| A11501 | Non-toxicity                                                                 |
| A11502 | Acute Toxicity, Skin and Eye Irritation, Reproductive Effects, Multiple Dose |
| A11503 | Acute Toxicity                                                               |
| A11504 | Mutagenicity                                                                 |
| A11505 | Non-toxicity                                                                 |
| A11506 | Skin and Eye Irritation                                                      |
| A11507 | Acute Toxicity                                                               |

|        |                                                     |
|--------|-----------------------------------------------------|
| A11508 | Non-toxicity                                        |
| A11509 | Acute Toxicity                                      |
| A11510 | Acute Toxicity                                      |
| A11511 | Acute Toxicity                                      |
| A11512 | Acute Toxicity                                      |
| A11513 | Acute Toxicity                                      |
| A11514 | Acute Toxicity                                      |
| A11515 | Acute Toxicity                                      |
| A11516 | Acute Toxicity                                      |
| A11517 | Acute Toxicity                                      |
| A11518 | Acute Toxicity                                      |
| A11519 | Acute Toxicity                                      |
| A11520 | Acute Toxicity                                      |
| A11521 | Acute Toxicity                                      |
| A11522 | Acute Toxicity                                      |
| A11523 | Acute Toxicity                                      |
| A11524 | Mutagenicity                                        |
| A11525 | Acute Toxicity, Mutagenicity, Multiple Dose Effects |
| A11526 | Skin and Eye Irritation, Multiple Dose Effects      |
| A11527 | Mutagenicity, Tumorigenicity                        |
| A11528 | Acute Toxicity                                      |
| A11529 | Acute Toxicity                                      |
| A11530 | Mutagenicity, Tumorigenicity                        |
| A11531 | Mutagenicity                                        |
| A11532 | Tumorigenicity                                      |
| A11533 | Reproductive Effects                                |
| A11534 | Mutagenicity                                        |
| A11535 | Non-toxicity                                        |
| A11536 | Mutagenicity                                        |
| A11537 | Acute Toxicity                                      |
| A11538 | Acute Toxicity                                      |
| A11539 | Multiple Dose Effects                               |
| A11540 | Acute Toxicity                                      |
| A11541 | Acute Toxicity, Reproductive Effects                |
| A11542 | Multiple Dose Effects                               |
| A11543 | Mutagenicity, Tumorigenicity                        |
| A11544 | Acute Toxicity                                      |
| A11545 | Acute Toxicity                                      |
| A11546 | Mutagenicity                                        |
| A11547 | Acute Toxicity, Mutagenicity                        |
| A11548 | Tumorigenicity                                      |
| A11549 | Acute Toxicity                                      |
| A11550 | Acute Toxicity                                      |
| A11551 | Acute Toxicity, Multiple Dose Effects               |
| A11552 | Acute Toxicity                                      |
| A11553 | Acute Toxicity                                      |

|        |                                                                           |
|--------|---------------------------------------------------------------------------|
| A11554 | Acute Toxicity, Multiple Dose Effects                                     |
| A11555 | Acute Toxicity                                                            |
| A11556 | Tumorigenicity                                                            |
| A11557 | Mutagenicity                                                              |
| A11558 | Multiple Dose Effects                                                     |
| A11559 | Multiple Dose Effects                                                     |
| A11560 | Non-toxicity                                                              |
| A11561 | Mutagenicity                                                              |
| A11562 | Mutagenicity                                                              |
| A11563 | Mutagenicity                                                              |
| A11564 | Acute Toxicity, Mutagenicity, Tumorigenicity                              |
| A11565 | Acute Toxicity                                                            |
| A11566 | Mutagenicity                                                              |
| A11567 | Mutagenicity, Tumorigenicity                                              |
| A11568 | Mutagenicity                                                              |
| A11569 | Mutagenicity                                                              |
| A11570 | Acute Toxicity, Mutagenicity, Reproductive Effects, Multiple Dose Effects |
| A11571 | Mutagenicity                                                              |
| A11572 | Acute Toxicity                                                            |
| A11573 | Tumorigenicity                                                            |
| A11574 | Mutagenicity                                                              |
| A11575 | Mutagenicity                                                              |
| A11576 | Mutagenicity                                                              |
| A11577 | Mutagenicity                                                              |
| A11578 | Acute Toxicity                                                            |
| A11579 | Mutagenicity                                                              |
| A11580 | Acute Toxicity, Reproductive Effects, Multiple Dose Effects               |
| A11581 | Mutagenicity, Tumorigenicity                                              |
| A11582 | Mutagenicity                                                              |
| A11583 | Skin and Eye Irritation                                                   |
| A11584 | Non-toxicity                                                              |
| A11585 | Mutagenicity                                                              |
| A11586 | Mutagenicity                                                              |
| A11587 | Mutagenicity, Tumorigenicity                                              |
| A11588 | Acute Toxicity, Multiple Dose Effects                                     |
| A11589 | Acute Toxicity, Skin and Eye Irritation                                   |
| A11590 | Acute Toxicity                                                            |
| A11591 | Acute Toxicity, Multiple Dose Effects                                     |
| A11592 | Mutagenicity                                                              |
| A11593 | Acute Toxicity                                                            |
| A11594 | Mutagenicity, Tumorigenicity                                              |
| A11595 | Mutagenicity                                                              |
| A11596 | Acute Toxicity, Multiple Dose Effects                                     |
| A11597 | Acute Toxicity                                                            |
| A11598 | Acute Toxicity, Tumorigenicity, Multiple Dose Effects                     |
| A11599 | Mutagenicity                                                              |

|        |                                                                |
|--------|----------------------------------------------------------------|
| A11600 | Mutagenicity, Tumorigenicity                                   |
| A11601 | Non-toxicity                                                   |
| A11602 | Mutagenicity                                                   |
| A11603 | Mutagenicity                                                   |
| A11604 | Non-toxicity                                                   |
| A11605 | Tumorigenicity                                                 |
| A11606 | Multiple Dose Effects                                          |
| A11607 | Acute Toxicity                                                 |
| A11608 | Acute Toxicity                                                 |
| A11609 | Mutagenicity                                                   |
| A11610 | Mutagenicity, Tumorigenicity                                   |
| A11611 | Mutagenicity                                                   |
| A11612 | Acute Toxicity                                                 |
| A11613 | Acute Toxicity                                                 |
| A11614 | Acute Toxicity, Multiple Dose Effects                          |
| A11615 | Acute Toxicity                                                 |
| A11616 | Acute Toxicity, Multiple Dose Effects                          |
| A11617 | Acute Toxicity                                                 |
| A11618 | Acute Toxicity                                                 |
| A11619 | Acute Toxicity                                                 |
| A11620 | Acute Toxicity                                                 |
| A11621 | Acute Toxicity, Multiple Dose Effects                          |
| A11622 | Acute Toxicity                                                 |
| A11623 | Acute Toxicity                                                 |
| A11624 | Acute Toxicity                                                 |
| A11625 | Acute Toxicity                                                 |
| A11626 | Acute Toxicity                                                 |
| A11627 | Acute Toxicity                                                 |
| A11628 | Acute Toxicity                                                 |
| A11629 | Acute Toxicity                                                 |
| A11630 | Acute Toxicity, Skin and Eye Irritation, Multiple Dose Effects |
| A11631 | Acute Toxicity                                                 |
| A11632 | Acute Toxicity                                                 |
| A11633 | Acute Toxicity                                                 |
| A11634 | Acute Toxicity                                                 |
| A11635 | Acute Toxicity                                                 |
| A11636 | Acute Toxicity                                                 |
| A11637 | Acute Toxicity                                                 |
| A11638 | Acute Toxicity                                                 |
| A11639 | Acute Toxicity                                                 |
| A11640 | Acute Toxicity                                                 |
| A11641 | Acute Toxicity                                                 |
| A11642 | Acute Toxicity                                                 |
| A11643 | Acute Toxicity                                                 |
| A11644 | Acute Toxicity                                                 |
| A11645 | Acute Toxicity                                                 |

|        |                                                                             |
|--------|-----------------------------------------------------------------------------|
| A11646 | Acute Toxicity                                                              |
| A11647 | Acute Toxicity                                                              |
| A11648 | Acute Toxicity, Multiple Dose Effects                                       |
| A11649 | Acute Toxicity, Multiple Dose Effects                                       |
| A11650 | Reproductive Effects                                                        |
| A11651 | Multiple Dose Effects                                                       |
| A11652 | Tumorigenicity                                                              |
| A11653 | Tumorigenicity, Multiple Dose Effects                                       |
| A11654 | Mutagenicity, Tumorigenicity                                                |
| A11655 | Mutagenicity                                                                |
| A11656 | Acute Toxicity, Mutagenicity, Multiple Dose Effects                         |
| A11657 | Acute Toxicity, Mutagenicity                                                |
| A11658 | Acute Toxicity                                                              |
| A11659 | Acute Toxicity                                                              |
| A11660 | Reproductive Effects                                                        |
| A11661 | Mutagenicity                                                                |
| A11662 | Reproductive Effects                                                        |
| A11663 | Mutagenicity, Multiple Dose Effects                                         |
| A11664 | Acute Toxicity                                                              |
| A11665 | Acute Toxicity                                                              |
| A11666 | Mutagenicity                                                                |
| A11667 | Mutagenicity                                                                |
| A11668 | Mutagenicity                                                                |
| A11669 | Mutagenicity                                                                |
| A11670 | Acute Toxicity                                                              |
| A11671 | Acute Toxicity                                                              |
| A11672 | Acute Toxicity, Tumorigenicity, Reproductive Effects, Multiple Dose Effects |
| A11673 | Acute Toxicity                                                              |
| A11674 | Mutagenicity, Tumorigenicity                                                |
| A11675 | Mutagenicity, Multiple Dose Effects                                         |
| A11676 | Mutagenicity                                                                |
| A11677 | Acute Toxicity                                                              |
| A11678 | Tumorigenicity, Skin and Eye Irritation                                     |
| A11679 | Reproductive Effects                                                        |
| A11680 | Mutagenicity                                                                |
| A11681 | Mutagenicity                                                                |
| A11682 | Mutagenicity, Tumorigenicity                                                |
| A11683 | Acute Toxicity, Mutagenicity, Tumorigenicity, Skin and Eye Irritation,      |
| A11684 | Acute Toxicity, Multiple Dose Effects                                       |
| A11685 | Acute Toxicity                                                              |
| A11686 | Mutagenicity                                                                |
| A11687 | Mutagenicity, Tumorigenicity                                                |
| A11688 | Acute Toxicity                                                              |
| A11689 | Acute Toxicity, Mutagenicity, Multiple Dose Effects                         |
| A11690 | Acute Toxicity                                                              |
| A11691 | Reproductive Effects                                                        |

|        |                                                                           |
|--------|---------------------------------------------------------------------------|
| A11692 | Acute Toxicity, Reproductive Effects, Multiple Dose Effects               |
| A11693 | Mutagenicity                                                              |
| A11694 | Non-toxicity                                                              |
| A11695 | Acute Toxicity                                                            |
| A11696 | Mutagenicity                                                              |
| A11697 | Acute Toxicity                                                            |
| A11698 | Mutagenicity                                                              |
| A11699 | Acute Toxicity                                                            |
| A11700 | Mutagenicity                                                              |
| A11701 | Mutagenicity                                                              |
| A11702 | Acute Toxicity                                                            |
| A11703 | Mutagenicity                                                              |
| A11704 | Acute Toxicity                                                            |
| A11705 | Acute Toxicity, Multiple Dose Effects                                     |
| A11706 | Acute Toxicity                                                            |
| A11707 | Mutagenicity                                                              |
| A11708 | Acute Toxicity, Reproductive Effects                                      |
| A11709 | Mutagenicity                                                              |
| A11710 | Mutagenicity                                                              |
| A11711 | Acute Toxicity, Skin and Eye Irritation                                   |
| A11712 | Mutagenicity                                                              |
| A11713 | Mutagenicity, Reproductive Effects                                        |
| A11714 | Multiple Dose Effects                                                     |
| A11715 | Mutagenicity                                                              |
| A11716 | Acute Toxicity, Mutagenicity                                              |
| A11717 | Mutagenicity, Tumorigenicity                                              |
| A11718 | Acute Toxicity                                                            |
| A11719 | Mutagenicity, Tumorigenicity                                              |
| A11720 | Mutagenicity                                                              |
| A11721 | Mutagenicity, Tumorigenicity                                              |
| A11722 | Mutagenicity                                                              |
| A11723 | Mutagenicity                                                              |
| A11724 | Acute Toxicity                                                            |
| A11725 | Acute Toxicity                                                            |
| A11726 | Mutagenicity, Tumorigenicity                                              |
| A11727 | Acute Toxicity, Mutagenicity, Reproductive Effects, Multiple Dose Effects |
| A11728 | Acute Toxicity, Multiple Dose Effects                                     |
| A11729 | Acute Toxicity, Reproductive Effects, Multiple Dose Effects               |
| A11730 | Tumorigenicity                                                            |
| A11731 | Acute Toxicity                                                            |
| A11732 | Mutagenicity                                                              |
| A11733 | Acute Toxicity                                                            |
| A11734 | Acute Toxicity, Multiple Dose Effects                                     |
| A11735 | Acute Toxicity, Multiple Dose Effects                                     |
| A11736 | Acute Toxicity                                                            |
| A11737 | Acute Toxicity                                                            |

|        |                                                             |
|--------|-------------------------------------------------------------|
| A11738 | Mutagenicity                                                |
| A11739 | Skin and Eye Irritation                                     |
| A11740 | Acute Toxicity                                              |
| A11741 | Acute Toxicity, Reproductive Effects, Multiple Dose Effects |
| A11742 | Acute Toxicity, Reproductive Effects, Multiple Dose Effects |
| A11743 | Acute Toxicity                                              |
| A11744 | Acute Toxicity                                              |
| A11745 | Acute Toxicity, Skin and Eye Irritation                     |
| A11746 | Acute Toxicity                                              |
| A11747 | Acute Toxicity, Reproductive Effects                        |
| A11748 | Acute Toxicity                                              |
| A11749 | Acute Toxicity                                              |
| A11750 | Acute Toxicity, Multiple Dose Effects                       |
| A11751 | Acute Toxicity                                              |
| A11752 | Acute Toxicity                                              |
| A11753 | Acute Toxicity                                              |
| A11754 | Acute Toxicity                                              |
| A11755 | Acute Toxicity                                              |
| A11756 | Acute Toxicity                                              |
| A11757 | Acute Toxicity                                              |
| A11758 | Acute Toxicity                                              |
| A11759 | Acute Toxicity                                              |
| A11760 | Acute Toxicity                                              |
| A11761 | Acute Toxicity                                              |
| A11762 | Acute Toxicity                                              |
| A11763 | Acute Toxicity                                              |
| A11764 | Acute Toxicity                                              |
| A11765 | Acute Toxicity                                              |
| A11766 | Acute Toxicity                                              |
| A11767 | Acute Toxicity                                              |
| A11768 | Acute Toxicity                                              |
| A11769 | Acute Toxicity                                              |
| A11770 | Acute Toxicity                                              |
| A11771 | Acute Toxicity                                              |
| A11772 | Acute Toxicity                                              |
| A11773 | Acute Toxicity                                              |
| A11774 | Acute Toxicity                                              |
| A11775 | Acute Toxicity                                              |
| A11776 | Acute Toxicity                                              |
| A11777 | Acute Toxicity                                              |
| A11778 | Acute Toxicity                                              |
| A11779 | Acute Toxicity                                              |
| A11780 | Acute Toxicity                                              |
| A11781 | Acute Toxicity                                              |
| A11782 | Acute Toxicity                                              |
| A11783 | Acute Toxicity                                              |

|        |                                       |
|--------|---------------------------------------|
| A11784 | Acute Toxicity                        |
| A11785 | Acute Toxicity                        |
| A11786 | Acute Toxicity                        |
| A11787 | Acute Toxicity                        |
| A11788 | Acute Toxicity                        |
| A11789 | Acute Toxicity                        |
| A11790 | Acute Toxicity                        |
| A11791 | Acute Toxicity                        |
| A11792 | Acute Toxicity                        |
| A11793 | Acute Toxicity                        |
| A11794 | Acute Toxicity                        |
| A11795 | Acute Toxicity                        |
| A11796 | Acute Toxicity                        |
| A11797 | Acute Toxicity                        |
| A11798 | Acute Toxicity, Multiple Dose Effects |
| A11799 | Acute Toxicity                        |
| A11800 | Acute Toxicity                        |
| A11801 | Acute Toxicity                        |
| A11802 | Acute Toxicity                        |
| A11803 | Acute Toxicity                        |
| A11804 | Acute Toxicity                        |
| A11805 | Acute Toxicity                        |
| A11806 | Acute Toxicity                        |
| A11807 | Acute Toxicity                        |
| A11808 | Acute Toxicity                        |
| A11809 | Acute Toxicity, Reproductive Effects  |
| A11810 | Acute Toxicity                        |
| A11811 | Acute Toxicity                        |
| A11812 | Acute Toxicity                        |
| A11813 | Acute Toxicity                        |
| A11814 | Acute Toxicity                        |
| A11815 | Acute Toxicity                        |
| A11816 | Acute Toxicity                        |
| A11817 | Acute Toxicity                        |
| A11818 | Acute Toxicity                        |
| A11819 | Acute Toxicity                        |
| A11820 | Acute Toxicity                        |
| A11821 | Acute Toxicity                        |
| A11822 | Acute Toxicity                        |
| A11823 | Acute Toxicity                        |
| A11824 | Acute Toxicity                        |
| A11825 | Skin and Eye Irritation               |
| A11826 | Non-toxicity                          |
| A11827 | Acute Toxicity                        |
| A11828 | Acute Toxicity                        |
| A11829 | Multiple Dose Effects                 |



|        |                                       |
|--------|---------------------------------------|
| A11830 | Mutagenicity                          |
| A11831 | Multiple Dose Effects                 |
| A11832 | Acute Toxicity, Multiple Dose Effects |
| A11833 | Acute Toxicity                        |
| A11834 | Non-toxicity                          |
| A11835 | Mutagenicity                          |
| A11836 | Acute Toxicity                        |
| A11837 | Acute Toxicity, Multiple Dose Effects |
| A11838 | Acute Toxicity, Multiple Dose Effects |
| A11839 | Non-toxicity                          |
| A11840 | Mutagenicity                          |
| A11841 | Acute Toxicity                        |
| A11842 | Acute Toxicity                        |
| A11843 | Tumorigenicity                        |
| A11844 | Tumorigenicity                        |
| A11845 | Acute Toxicity, Multiple Dose Effects |
| A11846 | Acute Toxicity                        |
| A11847 | Acute Toxicity, Multiple Dose Effects |
| A11848 | Mutagenicity                          |
| A11849 | Acute Toxicity                        |
| A11850 | Non-toxicity                          |
| A11851 | Acute Toxicity                        |
| A11852 | Acute Toxicity                        |
| A11853 | Non-toxicity                          |
| A11854 | Acute Toxicity                        |
| A11855 | Acute Toxicity, Multiple Dose Effects |
| A11856 | Non-toxicity                          |
| A11857 | Acute Toxicity                        |
| A11858 | Acute Toxicity                        |
| A11859 | Multiple Dose Effects                 |
| A11860 | Acute Toxicity                        |
| A11861 | Acute Toxicity                        |
| A11862 | Multiple Dose Effects                 |
| A11863 | Acute Toxicity                        |
| A11864 | Acute Toxicity                        |
| A11865 | Acute Toxicity                        |
| A11866 | Acute Toxicity                        |
| A11867 | Acute Toxicity                        |
| A11868 | Tumorigenicity                        |
| A11869 | Mutagenicity                          |
| A11870 | Acute Toxicity                        |
| A11871 | Acute Toxicity                        |
| A11872 | Mutagenicity                          |
| A11873 | Acute Toxicity, Multiple Dose Effects |
| A11874 | Skin and Eye Irritation               |
| A11875 | Acute Toxicity                        |

|        |                                                                           |
|--------|---------------------------------------------------------------------------|
| A11876 | Acute Toxicity                                                            |
| A11877 | Acute Toxicity                                                            |
| A11878 | Acute Toxicity                                                            |
| A11879 | Acute Toxicity                                                            |
| A11880 | Acute Toxicity                                                            |
| A11881 | Mutagenicity                                                              |
| A11882 | Acute Toxicity                                                            |
| A11883 | Acute Toxicity                                                            |
| A11884 | Multiple Dose Effects                                                     |
| A11885 | Acute Toxicity, Tumorigenicity, Skin and Eye Irritation, Multiple Dose    |
| A11886 | Mutagenicity                                                              |
| A11887 | Mutagenicity                                                              |
| A11888 | Tumorigenicity                                                            |
| A11889 | Mutagenicity                                                              |
| A11890 | Mutagenicity, Tumorigenicity                                              |
| A11891 | Mutagenicity                                                              |
| A11892 | Mutagenicity, Reproductive Effects, Multiple Dose Effects                 |
| A11893 | Mutagenicity                                                              |
| A11894 | Multiple Dose Effects                                                     |
| A11895 | Mutagenicity                                                              |
| A11896 | Mutagenicity                                                              |
| A11897 | Acute Toxicity, Mutagenicity, Tumorigenicity, Skin and Eye Irritation,    |
| A11898 | Mutagenicity                                                              |
| A11899 | Mutagenicity                                                              |
| A11900 | Acute Toxicity, Multiple Dose Effects                                     |
| A11901 | Mutagenicity                                                              |
| A11902 | Mutagenicity                                                              |
| A11903 | Acute Toxicity                                                            |
| A11904 | Tumorigenicity                                                            |
| A11905 | Acute Toxicity, Multiple Dose Effects                                     |
| A11906 | Non-toxicity                                                              |
| A11907 | Acute Toxicity                                                            |
| A11908 | Acute Toxicity                                                            |
| A11909 | Acute Toxicity                                                            |
| A11910 | Acute Toxicity                                                            |
| A11911 | Acute Toxicity, Multiple Dose Effects                                     |
| A11912 | Mutagenicity                                                              |
| A11913 | Acute Toxicity, Multiple Dose Effects                                     |
| A11914 | Acute Toxicity                                                            |
| A11915 | Acute Toxicity, Mutagenicity                                              |
| A11916 | Acute Toxicity, Mutagenicity, Reproductive Effects, Multiple Dose Effects |
| A11917 | Acute Toxicity, Tumorigenicity, Multiple Dose Effects                     |
| A11918 | Acute Toxicity                                                            |
| A11919 | Acute Toxicity, Multiple Dose Effects                                     |
| A11920 | Multiple Dose Effects                                                     |
| A11921 | Non-toxicity                                                              |

|        |                                                                     |
|--------|---------------------------------------------------------------------|
| A11922 | Acute Toxicity, Multiple Dose Effects                               |
| A11923 | Acute Toxicity                                                      |
| A11924 | Acute Toxicity                                                      |
| A11925 | Mutagenicity                                                        |
| A11926 | Acute Toxicity                                                      |
| A11927 | Acute Toxicity                                                      |
| A11928 | Acute Toxicity                                                      |
| A11929 | Acute Toxicity                                                      |
| A11930 | Acute Toxicity                                                      |
| A11931 | Acute Toxicity, Mutagenicity, Tumorigenicity, Multiple Dose Effects |
| A11932 | Non-toxicity                                                        |
| A11933 | Acute Toxicity                                                      |
| A11934 | Acute Toxicity                                                      |
| A11935 | Acute Toxicity, Multiple Dose Effects                               |
| A11936 | Non-toxicity                                                        |
| A11937 | Acute Toxicity, Multiple Dose Effects                               |
| A11938 | Acute Toxicity                                                      |
| A11939 | Acute Toxicity                                                      |
| A11940 | Acute Toxicity, Multiple Dose Effects                               |
| A11941 | Non-toxicity                                                        |
| A11942 | Multiple Dose Effects                                               |
| A11943 | Non-toxicity                                                        |
| A11944 | Acute Toxicity                                                      |
| A11945 | Acute Toxicity                                                      |
| A11946 | Acute Toxicity, Mutagenicity                                        |
| A11947 | Tumorigenicity, Skin and Eye Irritation                             |
| A11948 | Acute Toxicity, Reproductive Effects                                |
| A11949 | Acute Toxicity                                                      |
| A11950 | Acute Toxicity                                                      |
| A11951 | Mutagenicity, Tumorigenicity, Multiple Dose Effects                 |
| A11952 | Multiple Dose Effects                                               |
| A11953 | Multiple Dose Effects                                               |
| A11954 | Multiple Dose Effects                                               |
| A11955 | Acute Toxicity, Mutagenicity                                        |
| A11956 | Mutagenicity                                                        |
| A11957 | Acute Toxicity                                                      |
| A11958 | Acute Toxicity                                                      |
| A11959 | Acute Toxicity                                                      |
| A11960 | Mutagenicity, Multiple Dose Effects                                 |
| A11961 | Mutagenicity                                                        |
| A11962 | Acute Toxicity                                                      |
| A11963 | Mutagenicity                                                        |
| A11964 | Acute Toxicity                                                      |
| A11965 | Acute Toxicity                                                      |
| A11966 | Acute Toxicity                                                      |
| A11967 | Mutagenicity                                                        |

|        |                                                                              |
|--------|------------------------------------------------------------------------------|
| A11968 | Multiple Dose Effects                                                        |
| A11969 | Acute Toxicity                                                               |
| A11970 | Mutagenicity                                                                 |
| A11971 | Tumorigenicity                                                               |
| A11972 | Mutagenicity, Tumorigenicity                                                 |
| A11973 | Acute Toxicity                                                               |
| A11974 | Acute Toxicity                                                               |
| A11975 | Acute Toxicity                                                               |
| A11976 | Mutagenicity, Tumorigenicity                                                 |
| A11977 | Mutagenicity                                                                 |
| A11978 | Mutagenicity                                                                 |
| A11979 | Mutagenicity, Tumorigenicity                                                 |
| A11980 | Acute Toxicity                                                               |
| A11981 | Multiple Dose Effects                                                        |
| A11982 | Tumorigenicity, Multiple Dose Effects                                        |
| A11983 | Acute Toxicity, Mutagenicity, Tumorigenicity, Skin and Eye Irritation,       |
| A11984 | Acute Toxicity                                                               |
| A11985 | Mutagenicity, Tumorigenicity                                                 |
| A11986 | Acute Toxicity, Mutagenicity                                                 |
| A11987 | Mutagenicity                                                                 |
| A11988 | Mutagenicity                                                                 |
| A11989 | Mutagenicity                                                                 |
| A11990 | Mutagenicity                                                                 |
| A11991 | Acute Toxicity                                                               |
| A11992 | Non-toxicity                                                                 |
| A11993 | Non-toxicity                                                                 |
| A11994 | Tumorigenicity, Reproductive Effects, Multiple Dose Effects                  |
| A11995 | Acute Toxicity, Mutagenicity                                                 |
| A11996 | Acute Toxicity, Mutagenicity                                                 |
| A11997 | Mutagenicity                                                                 |
| A11998 | Mutagenicity                                                                 |
| A11999 | Mutagenicity                                                                 |
| A12000 | Acute Toxicity                                                               |
| A12001 | Acute Toxicity                                                               |
| A12002 | Mutagenicity, Tumorigenicity                                                 |
| A12003 | Mutagenicity                                                                 |
| A12004 | Acute Toxicity                                                               |
| A12005 | Acute Toxicity, Mutagenicity, Skin and Eye Irritation, Multiple Dose Effects |
| A12006 | Mutagenicity                                                                 |
| A12007 | Acute Toxicity                                                               |
| A12008 | Acute Toxicity                                                               |
| A12009 | Acute Toxicity, Skin and Eye Irritation, Multiple Dose Effects               |
| A12010 | Multiple Dose Effects                                                        |
| A12011 | Acute Toxicity                                                               |
| A12012 | Acute Toxicity                                                               |
| A12013 | Reproductive Effects                                                         |

|        |                                                                        |
|--------|------------------------------------------------------------------------|
| A12014 | Acute Toxicity, Mutagenicity                                           |
| A12015 | Acute Toxicity                                                         |
| A12016 | Mutagenicity                                                           |
| A12017 | Acute Toxicity, Reproductive Effects, Multiple Dose Effects            |
| A12018 | Acute Toxicity                                                         |
| A12019 | Mutagenicity                                                           |
| A12020 | Acute Toxicity                                                         |
| A12021 | Mutagenicity                                                           |
| A12022 | Mutagenicity                                                           |
| A12023 | Tumorigenicity                                                         |
| A12024 | Mutagenicity                                                           |
| A12025 | Mutagenicity                                                           |
| A12026 | Acute Toxicity                                                         |
| A12027 | Acute Toxicity                                                         |
| A12028 | Acute Toxicity                                                         |
| A12029 | Acute Toxicity                                                         |
| A12030 | Acute Toxicity                                                         |
| A12031 | Mutagenicity                                                           |
| A12032 | Tumorigenicity                                                         |
| A12033 | Acute Toxicity                                                         |
| A12034 | Acute Toxicity                                                         |
| A12035 | Mutagenicity                                                           |
| A12036 | Mutagenicity                                                           |
| A12037 | Multiple Dose Effects                                                  |
| A12038 | Skin and Eye Irritation                                                |
| A12039 | Acute Toxicity                                                         |
| A12040 | Mutagenicity                                                           |
| A12041 | Acute Toxicity                                                         |
| A12042 | Acute Toxicity                                                         |
| A12043 | Acute Toxicity                                                         |
| A12044 | Acute Toxicity                                                         |
| A12045 | Mutagenicity, Tumorigenicity                                           |
| A12046 | Mutagenicity, Tumorigenicity                                           |
| A12047 | Acute Toxicity, Mutagenicity, Tumorigenicity, Skin and Eye Irritation, |
| A12048 | Acute Toxicity                                                         |
| A12049 | Acute Toxicity                                                         |
| A12050 | Acute Toxicity                                                         |
| A12051 | Mutagenicity                                                           |
| A12052 | Acute Toxicity, Multiple Dose Effects                                  |
| A12053 | Acute Toxicity                                                         |
| A12054 | Acute Toxicity                                                         |
| A12055 | Mutagenicity                                                           |
| A12056 | Acute Toxicity                                                         |
| A12057 | Reproductive Effects                                                   |
| A12058 | Acute Toxicity, Multiple Dose Effects                                  |
| A12059 | Acute Toxicity                                                         |

|        |                                       |
|--------|---------------------------------------|
| A12060 | Acute Toxicity                        |
| A12061 | Reproductive Effects                  |
| A12062 | Acute Toxicity, Mutagenicity          |
| A12063 | Acute Toxicity                        |
| A12064 | Mutagenicity                          |
| A12065 | Mutagenicity, Tumorigenicity          |
| A12066 | Mutagenicity, Tumorigenicity          |
| A12067 | Multiple Dose Effects                 |
| A12068 | Multiple Dose Effects                 |
| A12069 | Acute Toxicity                        |
| A12070 | Acute Toxicity                        |
| A12071 | Acute Toxicity                        |
| A12072 | Mutagenicity, Tumorigenicity          |
| A12073 | Multiple Dose Effects                 |
| A12074 | Acute Toxicity                        |
| A12075 | Acute Toxicity                        |
| A12076 | Acute Toxicity                        |
| A12077 | Acute Toxicity                        |
| A12078 | Mutagenicity                          |
| A12079 | Multiple Dose Effects                 |
| A12080 | Acute Toxicity                        |
| A12081 | Acute Toxicity, Multiple Dose Effects |
| A12082 | Acute Toxicity                        |
| A12083 | Acute Toxicity                        |
| A12084 | Acute Toxicity                        |
| A12085 | Acute Toxicity, Mutagenicity          |
| A12086 | Acute Toxicity                        |
| A12087 | Mutagenicity                          |
| A12088 | Acute Toxicity                        |
| A12089 | Acute Toxicity                        |
| A12090 | Acute Toxicity                        |
| A12091 | Acute Toxicity                        |
| A12092 | Skin and Eye Irritation               |
| A12093 | Acute Toxicity                        |
| A12094 | Acute Toxicity                        |
| A12095 | Acute Toxicity                        |
| A12096 | Multiple Dose Effects                 |
| A12097 | Reproductive Effects                  |
| A12098 | Mutagenicity                          |
| A12099 | Acute Toxicity                        |
| A12100 | Acute Toxicity                        |
| A12101 | Acute Toxicity                        |
| A12102 | Acute Toxicity                        |
| A12103 | Acute Toxicity                        |
| A12104 | Acute Toxicity                        |
| A12105 | Acute Toxicity                        |

|        |                                       |
|--------|---------------------------------------|
| A12106 | Acute Toxicity                        |
| A12107 | Acute Toxicity, Multiple Dose Effects |
| A12108 | Mutagenicity                          |
| A12109 | Acute Toxicity                        |
| A12110 | Acute Toxicity                        |
| A12111 | Mutagenicity                          |
| A12112 | Mutagenicity                          |
| A12113 | Acute Toxicity                        |
| A12114 | Acute Toxicity                        |
| A12115 | Acute Toxicity                        |
| A12116 | Acute Toxicity                        |
| A12117 | Mutagenicity, Tumorigenicity          |
| A12118 | Acute Toxicity                        |
| A12119 | Mutagenicity, Tumorigenicity          |
| A12120 | Acute Toxicity, Mutagenicity          |
| A12121 | Mutagenicity, Reproductive Effects    |
| A12122 | Non-toxicity                          |
| A12123 | Mutagenicity                          |
| A12124 | Mutagenicity                          |
| A12125 | Acute Toxicity                        |
| A12126 | Acute Toxicity                        |
| A12127 | Acute Toxicity, Reproductive Effects  |
| A12128 | Mutagenicity                          |
| A12129 | Mutagenicity                          |
| A12130 | Acute Toxicity                        |
| A12131 | Mutagenicity, Tumorigenicity          |
| A12132 | Mutagenicity, Tumorigenicity          |
| A12133 | Mutagenicity                          |
| A12134 | Mutagenicity                          |
| A12135 | Mutagenicity                          |
| A12136 | Acute Toxicity                        |
| A12137 | Acute Toxicity                        |
| A12138 | Acute Toxicity, Multiple Dose Effects |
| A12139 | Acute Toxicity                        |
| A12140 | Mutagenicity                          |
| A12141 | Non-toxicity                          |
| A12142 | Acute Toxicity                        |
| A12143 | Acute Toxicity                        |
| A12144 | Mutagenicity                          |
| A12145 | Acute Toxicity                        |
| A12146 | Acute Toxicity, Multiple Dose Effects |
| A12147 | Mutagenicity                          |
| A12148 | Acute Toxicity                        |
| A12149 | Acute Toxicity                        |
| A12150 | Mutagenicity                          |
| A12151 | Acute Toxicity                        |

|        |                                       |
|--------|---------------------------------------|
| A12152 | Acute Toxicity, Multiple Dose Effects |
| A12153 | Acute Toxicity                        |
| A12154 | Mutagenicity, Tumorigenicity          |
| A12155 | Acute Toxicity                        |
| A12156 | Mutagenicity                          |
| A12157 | Acute Toxicity                        |
| A12158 | Acute Toxicity, Multiple Dose Effects |
| A12159 | Acute Toxicity                        |
| A12160 | Acute Toxicity                        |
| A12161 | Mutagenicity                          |
| A12162 | Acute Toxicity                        |
| A12163 | Multiple Dose Effects                 |
| A12164 | Mutagenicity                          |
| A12165 | Multiple Dose Effects                 |
| A12166 | Mutagenicity                          |
| A12167 | Acute Toxicity                        |
| A12168 | Acute Toxicity                        |
| A12169 | Mutagenicity, Tumorigenicity          |
| A12170 | Acute Toxicity                        |
| A12171 | Mutagenicity                          |
| A12172 | Acute Toxicity                        |
| A12173 | Acute Toxicity, Multiple Dose Effects |
| A12174 | Mutagenicity                          |
| A12175 | Acute Toxicity                        |
| A12176 | Mutagenicity                          |
| A12177 | Acute Toxicity, Multiple Dose Effects |
| A12178 | Acute Toxicity                        |
| A12179 | Acute Toxicity                        |
| A12180 | Multiple Dose Effects                 |
| A12181 | Acute Toxicity                        |
| A12182 | Mutagenicity                          |
| A12183 | Acute Toxicity                        |
| A12184 | Acute Toxicity                        |
| A12185 | Mutagenicity                          |
| A12186 | Acute Toxicity                        |
| A12187 | Mutagenicity                          |
| A12188 | Mutagenicity                          |
| A12189 | Acute Toxicity                        |
| A12190 | Mutagenicity                          |
| A12191 | Acute Toxicity, Mutagenicity          |
| A12192 | Mutagenicity                          |
| A12193 | Mutagenicity                          |
| A12194 | Mutagenicity                          |
| A12195 | Acute Toxicity                        |
| A12196 | Acute Toxicity                        |
| A12197 | Acute Toxicity                        |



|        |                                                       |
|--------|-------------------------------------------------------|
| A12198 | Acute Toxicity                                        |
| A12199 | Multiple Dose Effects                                 |
| A12200 | Multiple Dose Effects                                 |
| A12201 | Acute Toxicity                                        |
| A12202 | Mutagenicity                                          |
| A12203 | Mutagenicity                                          |
| A12204 | Acute Toxicity, Mutagenicity, Skin and Eye Irritation |
| A12205 | Acute Toxicity, Mutagenicity                          |
| A12206 | Reproductive Effects                                  |
| A12207 | Mutagenicity, Tumorigenicity                          |
| A12208 | Acute Toxicity, Multiple Dose Effects                 |
| A12209 | Acute Toxicity                                        |
| A12210 | Acute Toxicity                                        |
| A12211 | Multiple Dose Effects                                 |
| A12212 | Tumorigenicity                                        |
| A12213 | Acute Toxicity                                        |
| A12214 | Multiple Dose Effects                                 |
| A12215 | Acute Toxicity                                        |
| A12216 | Acute Toxicity                                        |
| A12217 | Acute Toxicity                                        |
| A12218 | Acute Toxicity                                        |
| A12219 | Reproductive Effects                                  |
| A12220 | Non-toxicity                                          |
| A12221 | Acute Toxicity, Multiple Dose Effects                 |
| A12222 | Acute Toxicity                                        |
| A12223 | Acute Toxicity                                        |
| A12224 | Mutagenicity                                          |
| A12225 | Acute Toxicity                                        |
| A12226 | Acute Toxicity                                        |
| A12227 | Acute Toxicity, Multiple Dose Effects                 |
| A12228 | Acute Toxicity                                        |
| A12229 | Acute Toxicity                                        |
| A12230 | Acute Toxicity                                        |
| A12231 | Acute Toxicity                                        |
| A12232 | Acute Toxicity                                        |
| A12233 | Acute Toxicity                                        |
| A12234 | Mutagenicity                                          |
| A12235 | Non-toxicity                                          |
| A12236 | Acute Toxicity                                        |
| A12237 | Acute Toxicity                                        |
| A12238 | Acute Toxicity                                        |
| A12239 | Acute Toxicity                                        |
| A12240 | Acute Toxicity                                        |
| A12241 | Acute Toxicity                                        |
| A12242 | Acute Toxicity                                        |
| A12243 | Acute Toxicity                                        |

|        |                                              |
|--------|----------------------------------------------|
| A12244 | Acute Toxicity                               |
| A12245 | Acute Toxicity                               |
| A12246 | Multiple Dose Effects                        |
| A12247 | Non-toxicity                                 |
| A12248 | Acute Toxicity, Multiple Dose Effects        |
| A12249 | Acute Toxicity                               |
| A12250 | Acute Toxicity                               |
| A12251 | Acute Toxicity                               |
| A12252 | Acute Toxicity                               |
| A12253 | Acute Toxicity                               |
| A12254 | Acute Toxicity, Multiple Dose Effects        |
| A12255 | Acute Toxicity, Multiple Dose Effects        |
| A12256 | Acute Toxicity                               |
| A12257 | Acute Toxicity                               |
| A12258 | Acute Toxicity                               |
| A12259 | Acute Toxicity                               |
| A12260 | Acute Toxicity                               |
| A12261 | Acute Toxicity                               |
| A12262 | Mutagenicity                                 |
| A12263 | Non-toxicity                                 |
| A12264 | Mutagenicity                                 |
| A12265 | Acute Toxicity, Mutagenicity                 |
| A12266 | Acute Toxicity                               |
| A12267 | Mutagenicity                                 |
| A12268 | Acute Toxicity                               |
| A12269 | Acute Toxicity                               |
| A12270 | Acute Toxicity                               |
| A12271 | Acute Toxicity                               |
| A12272 | Acute Toxicity                               |
| A12273 | Mutagenicity                                 |
| A12274 | Acute Toxicity                               |
| A12275 | Acute Toxicity                               |
| A12276 | Acute Toxicity                               |
| A12277 | Acute Toxicity                               |
| A12278 | Acute Toxicity, Mutagenicity, Tumorigenicity |
| A12279 | Acute Toxicity                               |
| A12280 | Acute Toxicity                               |
| A12281 | Acute Toxicity                               |
| A12282 | Tumorigenicity, Multiple Dose Effects        |
| A12283 | Mutagenicity                                 |
| A12284 | Multiple Dose Effects                        |
| A12285 | Acute Toxicity                               |
| A12286 | Acute Toxicity                               |
| A12287 | Acute Toxicity                               |
| A12288 | Acute Toxicity                               |
| A12289 | Reproductive Effects                         |

|        |                                                                           |
|--------|---------------------------------------------------------------------------|
| A12290 | Acute Toxicity                                                            |
| A12291 | Acute Toxicity                                                            |
| A12292 | Multiple Dose Effects                                                     |
| A12293 | Acute Toxicity                                                            |
| A12294 | Acute Toxicity                                                            |
| A12295 | Reproductive Effects, Multiple Dose Effects                               |
| A12296 | Acute Toxicity, Reproductive Effects                                      |
| A12297 | Reproductive Effects                                                      |
| A12298 | Acute Toxicity, Mutagenicity                                              |
| A12299 | Reproductive Effects                                                      |
| A12300 | Acute Toxicity                                                            |
| A12301 | Reproductive Effects                                                      |
| A12302 | Reproductive Effects                                                      |
| A12303 | Reproductive Effects                                                      |
| A12304 | Reproductive Effects, Multiple Dose Effects                               |
| A12305 | Reproductive Effects                                                      |
| A12306 | Reproductive Effects                                                      |
| A12307 | Reproductive Effects                                                      |
| A12308 | Reproductive Effects                                                      |
| A12309 | Mutagenicity                                                              |
| A12310 | Acute Toxicity                                                            |
| A12311 | Acute Toxicity                                                            |
| A12312 | Reproductive Effects                                                      |
| A12313 | Acute Toxicity                                                            |
| A12314 | Acute Toxicity                                                            |
| A12315 | Acute Toxicity, Mutagenicity, Reproductive Effects, Multiple Dose Effects |
| A12316 | Mutagenicity                                                              |
| A12317 | Mutagenicity                                                              |
| A12318 | Tumorigenicity                                                            |
| A12319 | Acute Toxicity                                                            |
| A12320 | Acute Toxicity, Mutagenicity, Multiple Dose Effects                       |
| A12321 | Tumorigenicity                                                            |
| A12322 | Reproductive Effects                                                      |
| A12323 | Acute Toxicity                                                            |
| A12324 | Acute Toxicity                                                            |
| A12325 | Acute Toxicity                                                            |
| A12326 | Mutagenicity                                                              |
| A12327 | Acute Toxicity, Reproductive Effects                                      |
| A12328 | Acute Toxicity, Multiple Dose Effects                                     |
| A12329 | Acute Toxicity, Multiple Dose Effects                                     |
| A12330 | Acute Toxicity                                                            |
| A12331 | Acute Toxicity                                                            |
| A12332 | Mutagenicity                                                              |
| A12333 | Mutagenicity, Tumorigenicity                                              |
| A12334 | Acute Toxicity                                                            |
| A12335 | Tumorigenicity                                                            |

|        |                                                                              |
|--------|------------------------------------------------------------------------------|
| A12336 | Mutagenicity                                                                 |
| A12337 | Mutagenicity                                                                 |
| A12338 | Acute Toxicity, Mutagenicity, Tumorigenicity                                 |
| A12339 | Mutagenicity                                                                 |
| A12340 | Mutagenicity                                                                 |
| A12341 | Non-toxicity                                                                 |
| A12342 | Mutagenicity                                                                 |
| A12343 | Mutagenicity, Tumorigenicity                                                 |
| A12344 | Mutagenicity                                                                 |
| A12345 | Mutagenicity                                                                 |
| A12346 | Mutagenicity                                                                 |
| A12347 | Skin and Eye Irritation                                                      |
| A12348 | Mutagenicity                                                                 |
| A12349 | Acute Toxicity                                                               |
| A12350 | Acute Toxicity                                                               |
| A12351 | Mutagenicity                                                                 |
| A12352 | Mutagenicity                                                                 |
| A12353 | Non-toxicity                                                                 |
| A12354 | Acute Toxicity, Multiple Dose Effects                                        |
| A12355 | Mutagenicity                                                                 |
| A12356 | Mutagenicity                                                                 |
| A12357 | Skin and Eye Irritation                                                      |
| A12358 | Acute Toxicity                                                               |
| A12359 | Non-toxicity                                                                 |
| A12360 | Mutagenicity, Tumorigenicity                                                 |
| A12361 | Acute Toxicity, Mutagenicity, Skin and Eye Irritation, Multiple Dose Effects |
| A12362 | Acute Toxicity                                                               |
| A12363 | Acute Toxicity, Mutagenicity, Multiple Dose Effects                          |
| A12364 | Non-toxicity                                                                 |
| A12365 | Acute Toxicity, Mutagenicity, Multiple Dose Effects                          |
| A12366 | Acute Toxicity                                                               |
| A12367 | Acute Toxicity                                                               |
| A12368 | Acute Toxicity                                                               |
| A12369 | Acute Toxicity                                                               |
| A12370 | Acute Toxicity                                                               |
| A12371 | Acute Toxicity                                                               |
| A12372 | Tumorigenicity                                                               |
| A12373 | Acute Toxicity, Mutagenicity, Tumorigenicity, Multiple Dose Effects          |
| A12374 | Mutagenicity                                                                 |
| A12375 | Non-toxicity                                                                 |
| A12376 | Mutagenicity                                                                 |
| A12377 | Mutagenicity                                                                 |
| A12378 | Multiple Dose Effects                                                        |
| A12379 | Mutagenicity                                                                 |
| A12380 | Mutagenicity                                                                 |
| A12381 | Acute Toxicity                                                               |

|        |                                                     |
|--------|-----------------------------------------------------|
| A12382 | Mutagenicity                                        |
| A12383 | Mutagenicity                                        |
| A12384 | Mutagenicity                                        |
| A12385 | Mutagenicity                                        |
| A12386 | Mutagenicity                                        |
| A12387 | Mutagenicity                                        |
| A12388 | Mutagenicity                                        |
| A12389 | Mutagenicity                                        |
| A12390 | Acute Toxicity, Multiple Dose Effects               |
| A12391 | Mutagenicity                                        |
| A12392 | Mutagenicity                                        |
| A12393 | Acute Toxicity                                      |
| A12394 | Mutagenicity                                        |
| A12395 | Acute Toxicity                                      |
| A12396 | Acute Toxicity                                      |
| A12397 | Acute Toxicity, Mutagenicity                        |
| A12398 | Mutagenicity                                        |
| A12399 | Mutagenicity                                        |
| A12400 | Acute Toxicity, Mutagenicity                        |
| A12401 | Mutagenicity                                        |
| A12402 | Mutagenicity                                        |
| A12403 | Acute Toxicity                                      |
| A12404 | Reproductive Effects                                |
| A12405 | Mutagenicity                                        |
| A12406 | Mutagenicity                                        |
| A12407 | Acute Toxicity                                      |
| A12408 | Acute Toxicity                                      |
| A12409 | Acute Toxicity                                      |
| A12410 | Mutagenicity                                        |
| A12411 | Acute Toxicity, Mutagenicity                        |
| A12412 | Acute Toxicity                                      |
| A12413 | Acute Toxicity, Mutagenicity                        |
| A12414 | Mutagenicity                                        |
| A12415 | Mutagenicity                                        |
| A12416 | Acute Toxicity                                      |
| A12417 | Acute Toxicity                                      |
| A12418 | Acute Toxicity                                      |
| A12419 | Acute Toxicity, Mutagenicity, Multiple Dose Effects |
| A12420 | Mutagenicity                                        |
| A12421 | Mutagenicity                                        |
| A12422 | Mutagenicity                                        |
| A12423 | Acute Toxicity, Mutagenicity, Tumorigenicity        |
| A12424 | Mutagenicity                                        |
| A12425 | Mutagenicity                                        |
| A12426 | Mutagenicity, Tumorigenicity                        |
| A12427 | Acute Toxicity                                      |

|        |                                       |
|--------|---------------------------------------|
| A12428 | Mutagenicity, Tumorigenicity          |
| A12429 | Mutagenicity                          |
| A12430 | Tumorigenicity                        |
| A12431 | Acute Toxicity, Mutagenicity          |
| A12432 | Mutagenicity                          |
| A12433 | Acute Toxicity, Multiple Dose Effects |
| A12434 | Mutagenicity                          |
| A12435 | Mutagenicity                          |
| A12436 | Mutagenicity                          |
| A12437 | Mutagenicity                          |
| A12438 | Mutagenicity                          |
| A12439 | Mutagenicity, Tumorigenicity          |
| A12440 | Mutagenicity                          |
| A12441 | Mutagenicity                          |
| A12442 | Mutagenicity                          |
| A12443 | Acute Toxicity                        |
| A12444 | Acute Toxicity                        |
| A12445 | Mutagenicity                          |
| A12446 | Mutagenicity, Tumorigenicity          |
| A12447 | Acute Toxicity                        |
| A12448 | Mutagenicity                          |
| A12449 | Mutagenicity                          |
| A12450 | Acute Toxicity                        |
| A12451 | Skin and Eye Irritation               |
| A12452 | Acute Toxicity                        |
| A12453 | Mutagenicity                          |
| A12454 | Mutagenicity                          |
| A12455 | Mutagenicity                          |
| A12456 | Mutagenicity                          |
| A12457 | Mutagenicity                          |
| A12458 | Mutagenicity                          |
| A12459 | Mutagenicity, Tumorigenicity          |
| A12460 | Tumorigenicity, Reproductive Effects  |
| A12461 | Mutagenicity                          |
| A12462 | Mutagenicity                          |
| A12463 | Mutagenicity                          |
| A12464 | Mutagenicity                          |
| A12465 | Mutagenicity                          |
| A12466 | Mutagenicity                          |
| A12467 | Tumorigenicity                        |
| A12468 | Mutagenicity                          |
| A12469 | Mutagenicity                          |
| A12470 | Mutagenicity                          |
| A12471 | Mutagenicity                          |
| A12472 | Mutagenicity                          |
| A12473 | Acute Toxicity                        |

|        |                                       |
|--------|---------------------------------------|
| A12474 | Mutagenicity                          |
| A12475 | Acute Toxicity, Mutagenicity          |
| A12476 | Mutagenicity                          |
| A12477 | Acute Toxicity                        |
| A12478 | Mutagenicity                          |
| A12479 | Mutagenicity, Tumorigenicity          |
| A12480 | Mutagenicity                          |
| A12481 | Mutagenicity                          |
| A12482 | Mutagenicity                          |
| A12483 | Mutagenicity                          |
| A12484 | Mutagenicity                          |
| A12485 | Mutagenicity                          |
| A12486 | Mutagenicity, Tumorigenicity          |
| A12487 | Acute Toxicity                        |
| A12488 | Mutagenicity                          |
| A12489 | Mutagenicity                          |
| A12490 | Mutagenicity                          |
| A12491 | Mutagenicity                          |
| A12492 | Non-toxicity                          |
| A12493 | Mutagenicity                          |
| A12494 | Mutagenicity                          |
| A12495 | Mutagenicity                          |
| A12496 | Mutagenicity                          |
| A12497 | Mutagenicity, Multiple Dose Effects   |
| A12498 | Mutagenicity                          |
| A12499 | Multiple Dose Effects                 |
| A12500 | Acute Toxicity                        |
| A12501 | Multiple Dose Effects                 |
| A12502 | Mutagenicity, Multiple Dose Effects   |
| A12503 | Acute Toxicity, Multiple Dose Effects |
| A12504 | Mutagenicity                          |
| A12505 | Mutagenicity                          |
| A12506 | Acute Toxicity, Multiple Dose Effects |
| A12507 | Multiple Dose Effects                 |
| A12508 | Multiple Dose Effects                 |
| A12509 | Non-toxicity                          |
| A12510 | Mutagenicity, Tumorigenicity          |
| A12511 | Mutagenicity                          |
| A12512 | Mutagenicity                          |
| A12513 | Mutagenicity                          |
| A12514 | Acute Toxicity, Mutagenicity          |
| A12515 | Acute Toxicity, Mutagenicity          |
| A12516 | Acute Toxicity, Mutagenicity          |
| A12517 | Mutagenicity                          |
| A12518 | Mutagenicity                          |
| A12519 | Mutagenicity                          |

|        |                                                                                                    |
|--------|----------------------------------------------------------------------------------------------------|
| A12520 | Mutagenicity                                                                                       |
| A12521 | Mutagenicity                                                                                       |
| A12522 | Mutagenicity                                                                                       |
| A12523 | Mutagenicity                                                                                       |
| A12524 | Mutagenicity                                                                                       |
| A12525 | Mutagenicity                                                                                       |
| A12526 | Mutagenicity                                                                                       |
| A12527 | Mutagenicity                                                                                       |
| A12528 | Mutagenicity                                                                                       |
| A12529 | Mutagenicity                                                                                       |
| A12530 | Mutagenicity                                                                                       |
| A12531 | Mutagenicity                                                                                       |
| A12532 | Mutagenicity                                                                                       |
| A12533 | Mutagenicity                                                                                       |
| A12534 | Mutagenicity                                                                                       |
| A12535 | Mutagenicity                                                                                       |
| A12536 | Mutagenicity                                                                                       |
| A12537 | Acute Toxicity, Mutagenicity                                                                       |
| A12538 | Acute Toxicity, Mutagenicity                                                                       |
| A12539 | Mutagenicity                                                                                       |
| A12540 | Mutagenicity                                                                                       |
| A12541 | Mutagenicity, Tumorigenicity                                                                       |
| A12542 | Mutagenicity                                                                                       |
| A12543 | Mutagenicity                                                                                       |
| A12544 | Reproductive Effects                                                                               |
| A12545 | Reproductive Effects                                                                               |
| A12546 | Reproductive Effects                                                                               |
| A12547 | Reproductive Effects                                                                               |
| A12548 | Acute Toxicity, Mutagenicity, Reproductive Effects                                                 |
| A12549 | Mutagenicity                                                                                       |
| A12550 | Mutagenicity                                                                                       |
| A12551 | Mutagenicity, Tumorigenicity                                                                       |
| A12552 | Mutagenicity                                                                                       |
| A12553 | Mutagenicity                                                                                       |
| A12554 | Mutagenicity                                                                                       |
| A12555 | Mutagenicity                                                                                       |
| A12556 | Acute Toxicity, Mutagenicity, Skin and Eye Irritation, Reproductive Effects, Multiple Dose Effects |
| A12557 | Acute Toxicity                                                                                     |
| A12558 | Mutagenicity                                                                                       |
| A12559 | Mutagenicity                                                                                       |
| A12560 | Mutagenicity, Tumorigenicity                                                                       |
| A12561 | Mutagenicity                                                                                       |
| A12562 | Mutagenicity                                                                                       |
| A12563 | Mutagenicity                                                                                       |
| A12564 | Non-toxicity                                                                                       |



|        |                              |
|--------|------------------------------|
| A12565 | Mutagenicity                 |
| A12566 | Mutagenicity                 |
| A12567 | Mutagenicity                 |
| A12568 | Mutagenicity                 |
| A12569 | Mutagenicity                 |
| A12570 | Mutagenicity                 |
| A12571 | Mutagenicity                 |
| A12572 | Mutagenicity                 |
| A12573 | Mutagenicity, Tumorigenicity |
| A12574 | Mutagenicity                 |
| A12575 | Mutagenicity                 |
| A12576 | Mutagenicity                 |
| A12577 | Tumorigenicity               |
| A12578 | Mutagenicity                 |
| A12579 | Mutagenicity                 |
| A12580 | Mutagenicity                 |
| A12581 | Mutagenicity                 |
| A12582 | Mutagenicity                 |
| A12583 | Mutagenicity, Tumorigenicity |
| A12584 | Acute Toxicity, Mutagenicity |
| A12585 | Mutagenicity                 |
| A12586 | Mutagenicity                 |
| A12587 | Mutagenicity                 |
| A12588 | Acute Toxicity               |
| A12589 | Reproductive Effects         |
| A12590 | Mutagenicity                 |
| A12591 | Mutagenicity, Tumorigenicity |
| A12592 | Mutagenicity                 |
| A12593 | Mutagenicity                 |
| A12594 | Mutagenicity                 |
| A12595 | Mutagenicity                 |
| A12596 | Mutagenicity                 |
| A12597 | Mutagenicity                 |
| A12598 | Mutagenicity                 |
| A12599 | Tumorigenicity               |
| A12600 | Mutagenicity                 |
| A12601 | Mutagenicity                 |
| A12602 | Mutagenicity                 |
| A12603 | Mutagenicity                 |
| A12604 | Mutagenicity                 |
| A12605 | Mutagenicity                 |
| A12606 | Multiple Dose Effects        |
| A12607 | Mutagenicity                 |
| A12608 | Mutagenicity                 |
| A12609 | Mutagenicity                 |
| A12610 | Mutagenicity                 |

|        |                                       |
|--------|---------------------------------------|
| A12611 | Mutagenicity                          |
| A12612 | Mutagenicity                          |
| A12613 | Mutagenicity                          |
| A12614 | Mutagenicity                          |
| A12615 | Mutagenicity                          |
| A12616 | Mutagenicity                          |
| A12617 | Mutagenicity                          |
| A12618 | Mutagenicity                          |
| A12619 | Mutagenicity                          |
| A12620 | Mutagenicity                          |
| A12621 | Mutagenicity                          |
| A12622 | Mutagenicity, Tumorigenicity          |
| A12623 | Mutagenicity                          |
| A12624 | Mutagenicity                          |
| A12625 | Non-toxicity                          |
| A12626 | Acute Toxicity                        |
| A12627 | Mutagenicity                          |
| A12628 | Mutagenicity, Tumorigenicity          |
| A12629 | Mutagenicity                          |
| A12630 | Tumorigenicity                        |
| A12631 | Mutagenicity                          |
| A12632 | Mutagenicity                          |
| A12633 | Mutagenicity                          |
| A12634 | Tumorigenicity                        |
| A12635 | Mutagenicity                          |
| A12636 | Mutagenicity                          |
| A12637 | Mutagenicity                          |
| A12638 | Mutagenicity                          |
| A12639 | Mutagenicity                          |
| A12640 | Mutagenicity                          |
| A12641 | Mutagenicity                          |
| A12642 | Mutagenicity                          |
| A12643 | Acute Toxicity                        |
| A12644 | Tumorigenicity, Multiple Dose Effects |
| A12645 | Reproductive Effects                  |
| A12646 | Non-toxicity                          |
| A12647 | Acute Toxicity                        |
| A12648 | Tumorigenicity                        |
| A12649 | Mutagenicity                          |
| A12650 | Mutagenicity                          |
| A12651 | Tumorigenicity                        |
| A12652 | Non-toxicity                          |
| A12653 | Acute Toxicity                        |
| A12654 | Reproductive Effects                  |
| A12655 | Multiple Dose Effects                 |
| A12656 | Acute Toxicity                        |

|        |                                       |
|--------|---------------------------------------|
| A12657 | Mutagenicity                          |
| A12658 | Acute Toxicity, Multiple Dose Effects |
| A12659 | Non-toxicity                          |
| A12660 | Multiple Dose Effects                 |
| A12661 | Acute Toxicity, Multiple Dose Effects |
| A12662 | Multiple Dose Effects                 |
| A12663 | Acute Toxicity                        |
| A12664 | Non-toxicity                          |
| A12665 | Multiple Dose Effects                 |
| A12666 | Non-toxicity                          |
| A12667 | Non-toxicity                          |
| A12668 | Non-toxicity                          |
| A12669 | Mutagenicity                          |
| A12670 | Mutagenicity                          |
| A12671 | Mutagenicity                          |
| A12672 | Acute Toxicity                        |
| A12673 | Acute Toxicity                        |
| A12674 | Mutagenicity                          |
| A12675 | Tumorigenicity                        |
| A12676 | Mutagenicity                          |
| A12677 | Acute Toxicity                        |
| A12678 | Acute Toxicity, Mutagenicity          |
| A12679 | Mutagenicity                          |
| A12680 | Non-toxicity                          |
| A12681 | Non-toxicity                          |
| A12682 | Mutagenicity                          |
| A12683 | Mutagenicity                          |
| A12684 | Mutagenicity                          |
| A12685 | Mutagenicity                          |
| A12686 | Acute Toxicity                        |
| A12687 | Acute Toxicity                        |
| A12688 | Mutagenicity                          |
| A12689 | Tumorigenicity                        |
| A12690 | Mutagenicity                          |
| A12691 | Acute Toxicity                        |
| A12692 | Acute Toxicity                        |
| A12693 | Acute Toxicity, Mutagenicity          |
| A12694 | Acute Toxicity                        |
| A12695 | Mutagenicity, Tumorigenicity          |
| A12696 | Mutagenicity                          |
| A12697 | Acute Toxicity                        |
| A12698 | Mutagenicity                          |
| A12699 | Mutagenicity                          |
| A12700 | Mutagenicity                          |
| A12701 | Mutagenicity                          |
| A12702 | Mutagenicity                          |

|        |                                                             |
|--------|-------------------------------------------------------------|
| A12703 | Non-toxicity                                                |
| A12704 | Acute Toxicity                                              |
| A12705 | Non-toxicity                                                |
| A12706 | Acute Toxicity                                              |
| A12707 | Mutagenicity                                                |
| A12708 | Mutagenicity                                                |
| A12709 | Mutagenicity                                                |
| A12710 | Acute Toxicity                                              |
| A12711 | Mutagenicity                                                |
| A12712 | Mutagenicity                                                |
| A12713 | Non-toxicity                                                |
| A12714 | Acute Toxicity                                              |
| A12715 | Non-toxicity                                                |
| A12716 | Mutagenicity, Tumorigenicity                                |
| A12717 | Mutagenicity                                                |
| A12718 | Mutagenicity                                                |
| A12719 | Mutagenicity                                                |
| A12720 | Mutagenicity                                                |
| A12721 | Mutagenicity                                                |
| A12722 | Acute Toxicity, Multiple Dose Effects                       |
| A12723 | Acute Toxicity, Multiple Dose Effects                       |
| A12724 | Acute Toxicity, Reproductive Effects, Multiple Dose Effects |
| A12725 | Non-toxicity                                                |
| A12726 | Acute Toxicity, Multiple Dose Effects                       |
| A12727 | Multiple Dose Effects                                       |
| A12728 | Acute Toxicity, Reproductive Effects, Multiple Dose Effects |
| A12729 | Acute Toxicity                                              |
| A12730 | Mutagenicity                                                |
| A12731 | Mutagenicity                                                |
| A12732 | Mutagenicity                                                |
| A12733 | Mutagenicity                                                |
| A12734 | Mutagenicity                                                |
| A12735 | Mutagenicity                                                |
| A12736 | Mutagenicity                                                |
| A12737 | Acute Toxicity                                              |
| A12738 | Multiple Dose Effects                                       |
| A12739 | Acute Toxicity, Mutagenicity                                |
| A12740 | Mutagenicity                                                |
| A12741 | Mutagenicity                                                |
| A12742 | Mutagenicity                                                |
| A12743 | Mutagenicity                                                |
| A12744 | Mutagenicity                                                |
| A12745 | Mutagenicity                                                |
| A12746 | Mutagenicity                                                |
| A12747 | Mutagenicity                                                |
| A12748 | Mutagenicity, Tumorigenicity                                |

|        |                                     |
|--------|-------------------------------------|
| A12749 | Mutagenicity                        |
| A12750 | Mutagenicity                        |
| A12751 | Mutagenicity                        |
| A12752 | Mutagenicity                        |
| A12753 | Tumorigenicity                      |
| A12754 | Tumorigenicity                      |
| A12755 | Tumorigenicity                      |
| A12756 | Mutagenicity                        |
| A12757 | Acute Toxicity, Tumorigenicity      |
| A12758 | Mutagenicity                        |
| A12759 | Mutagenicity                        |
| A12760 | Mutagenicity                        |
| A12761 | Mutagenicity                        |
| A12762 | Mutagenicity                        |
| A12763 | Mutagenicity                        |
| A12764 | Mutagenicity                        |
| A12765 | Mutagenicity                        |
| A12766 | Mutagenicity                        |
| A12767 | Mutagenicity                        |
| A12768 | Tumorigenicity                      |
| A12769 | Tumorigenicity                      |
| A12770 | Mutagenicity, Multiple Dose Effects |
| A12771 | Mutagenicity                        |
| A12772 | Mutagenicity                        |
| A12773 | Mutagenicity                        |
| A12774 | Mutagenicity                        |
| A12775 | Mutagenicity                        |
| A12776 | Mutagenicity                        |
| A12777 | Mutagenicity                        |
| A12778 | Mutagenicity                        |
| A12779 | Mutagenicity, Tumorigenicity        |
| A12780 | Mutagenicity                        |
| A12781 | Tumorigenicity                      |
| A12782 | Tumorigenicity                      |
| A12783 | Mutagenicity                        |
| A12784 | Mutagenicity                        |
| A12785 | Mutagenicity                        |
| A12786 | Tumorigenicity                      |
| A12787 | Tumorigenicity                      |
| A12788 | Mutagenicity                        |
| A12789 | Mutagenicity                        |
| A12790 | Mutagenicity                        |
| A12791 | Acute Toxicity                      |
| A12792 | Multiple Dose Effects               |
| A12793 | Acute Toxicity, Mutagenicity        |
| A12794 | Skin and Eye Irritation             |

|        |                                                                             |
|--------|-----------------------------------------------------------------------------|
| A12795 | Acute Toxicity                                                              |
| A12796 | Mutagenicity                                                                |
| A12797 | Mutagenicity                                                                |
| A12798 | Mutagenicity                                                                |
| A12799 | Mutagenicity                                                                |
| A12800 | Mutagenicity                                                                |
| A12801 | Mutagenicity                                                                |
| A12802 | Acute Toxicity                                                              |
| A12803 | Mutagenicity                                                                |
| A12804 | Tumorigenicity                                                              |
| A12805 | Mutagenicity                                                                |
| A12806 | Mutagenicity                                                                |
| A12807 | Mutagenicity                                                                |
| A12808 | Mutagenicity                                                                |
| A12809 | Tumorigenicity                                                              |
| A12810 | Acute Toxicity                                                              |
| A12811 | Mutagenicity, Tumorigenicity                                                |
| A12812 | Acute Toxicity                                                              |
| A12813 | Acute Toxicity                                                              |
| A12814 | Acute Toxicity                                                              |
| A12815 | Acute Toxicity                                                              |
| A12816 | Acute Toxicity                                                              |
| A12817 | Acute Toxicity, Mutagenicity                                                |
| A12818 | Non-toxicity                                                                |
| A12819 | Acute Toxicity                                                              |
| A12820 | Tumorigenicity                                                              |
| A12821 | Acute Toxicity, Reproductive Effects, Multiple Dose Effects                 |
| A12822 | Acute Toxicity                                                              |
| A12823 | Acute Toxicity                                                              |
| A12824 | Acute Toxicity, Mutagenicity, Tumorigenicity, Skin and Eye Irritation,      |
| A12825 | Multiple Dose Effects                                                       |
| A12826 | Acute Toxicity                                                              |
| A12827 | Acute Toxicity                                                              |
| A12828 | Acute Toxicity                                                              |
| A12829 | Acute Toxicity                                                              |
| A12830 | Acute Toxicity                                                              |
| A12831 | Acute Toxicity                                                              |
| A12832 | Acute Toxicity                                                              |
| A12833 | Mutagenicity                                                                |
| A12834 | Mutagenicity, Reproductive Effects                                          |
| A12835 | Acute Toxicity, Tumorigenicity, Reproductive Effects, Multiple Dose Effects |
| A12836 | Mutagenicity                                                                |
| A12837 | Acute Toxicity                                                              |
| A12838 | Mutagenicity                                                                |
| A12839 | Acute Toxicity                                                              |
| A12840 | Skin and Eye Irritation                                                     |

|        |                                         |
|--------|-----------------------------------------|
| A12841 | Acute Toxicity                          |
| A12842 | Skin and Eye Irritation                 |
| A12843 | Mutagenicity                            |
| A12844 | Acute Toxicity                          |
| A12845 | Mutagenicity                            |
| A12846 | Reproductive Effects                    |
| A12847 | Acute Toxicity                          |
| A12848 | Acute Toxicity                          |
| A12849 | Multiple Dose Effects                   |
| A12850 | Acute Toxicity                          |
| A12851 | Acute Toxicity                          |
| A12852 | Acute Toxicity                          |
| A12853 | Acute Toxicity, Multiple Dose Effects   |
| A12854 | Acute Toxicity, Multiple Dose Effects   |
| A12855 | Mutagenicity                            |
| A12856 | Acute Toxicity                          |
| A12857 | Tumorigenicity                          |
| A12858 | Acute Toxicity, Multiple Dose Effects   |
| A12859 | Mutagenicity                            |
| A12860 | Mutagenicity                            |
| A12861 | Mutagenicity                            |
| A12862 | Tumorigenicity                          |
| A12863 | Acute Toxicity                          |
| A12864 | Acute Toxicity                          |
| A12865 | Acute Toxicity                          |
| A12866 | Acute Toxicity                          |
| A12867 | Acute Toxicity                          |
| A12868 | Acute Toxicity, Skin and Eye Irritation |
| A12869 | Reproductive Effects                    |
| A12870 | Acute Toxicity                          |
| A12871 | Acute Toxicity, Multiple Dose Effects   |
| A12872 | Acute Toxicity                          |
| A12873 | Acute Toxicity, Multiple Dose Effects   |
| A12874 | Acute Toxicity, Mutagenicity            |
| A12875 | Multiple Dose Effects                   |
| A12876 | Mutagenicity                            |
| A12877 | Mutagenicity                            |
| A12878 | Acute Toxicity                          |
| A12879 | Mutagenicity                            |
| A12880 | Acute Toxicity                          |
| A12881 | Acute Toxicity                          |
| A12882 | Acute Toxicity, Reproductive Effects    |
| A12883 | Reproductive Effects                    |
| A12884 | Mutagenicity                            |
| A12885 | Acute Toxicity, Multiple Dose Effects   |
| A12886 | Non-toxicity                            |

|        |                                       |
|--------|---------------------------------------|
| A12887 | Multiple Dose Effects                 |
| A12888 | Mutagenicity                          |
| A12889 | Reproductive Effects                  |
| A12890 | Acute Toxicity                        |
| A12891 | Acute Toxicity                        |
| A12892 | Mutagenicity                          |
| A12893 | Mutagenicity                          |
| A12894 | Acute Toxicity                        |
| A12895 | Acute Toxicity, Multiple Dose Effects |
| A12896 | Mutagenicity                          |
| A12897 | Mutagenicity                          |
| A12898 | Mutagenicity                          |
| A12899 | Acute Toxicity, Mutagenicity          |
| A12900 | Acute Toxicity, Mutagenicity          |
| A12901 | Mutagenicity                          |
| A12902 | Acute Toxicity                        |
| A12903 | Acute Toxicity                        |
| A12904 | Acute Toxicity                        |
| A12905 | Mutagenicity                          |
| A12906 | Mutagenicity                          |
| A12907 | Mutagenicity                          |
| A12908 | Mutagenicity                          |
| A12909 | Acute Toxicity                        |
| A12910 | Acute Toxicity                        |
| A12911 | Acute Toxicity                        |
| A12912 | Acute Toxicity                        |
| A12913 | Mutagenicity                          |
| A12914 | Acute Toxicity                        |
| A12915 | Acute Toxicity, Mutagenicity          |
| A12916 | Mutagenicity                          |
| A12917 | Mutagenicity                          |
| A12918 | Acute Toxicity                        |
| A12919 | Acute Toxicity                        |
| A12920 | Mutagenicity                          |
| A12921 | Skin and Eye Irritation               |
| A12922 | Reproductive Effects                  |
| A12923 | Acute Toxicity                        |
| A12924 | Acute Toxicity, Mutagenicity          |
| A12925 | Acute Toxicity, Multiple Dose Effects |
| A12926 | Reproductive Effects                  |
| A12927 | Acute Toxicity                        |
| A12928 | Mutagenicity                          |
| A12929 | Acute Toxicity, Reproductive Effects  |
| A12930 | Acute Toxicity                        |
| A12931 | Acute Toxicity, Reproductive Effects  |
| A12932 | Acute Toxicity                        |



|        |                                                           |
|--------|-----------------------------------------------------------|
| A12933 | Skin and Eye Irritation                                   |
| A12934 | Mutagenicity                                              |
| A12935 | Acute Toxicity, Mutagenicity                              |
| A12936 | Mutagenicity, Tumorigenicity                              |
| A12937 | Acute Toxicity                                            |
| A12938 | Acute Toxicity                                            |
| A12939 | Acute Toxicity                                            |
| A12940 | Acute Toxicity, Multiple Dose Effects                     |
| A12941 | Mutagenicity, Tumorigenicity                              |
| A12942 | Acute Toxicity                                            |
| A12943 | Acute Toxicity                                            |
| A12944 | Mutagenicity, Reproductive Effects, Multiple Dose Effects |
| A12945 | Acute Toxicity                                            |
| A12946 | Acute Toxicity                                            |
| A12947 | Reproductive Effects                                      |
| A12948 | Acute Toxicity, Mutagenicity                              |
| A12949 | Acute Toxicity                                            |
| A12950 | Mutagenicity                                              |
| A12951 | Acute Toxicity                                            |
| A12952 | Acute Toxicity, Multiple Dose Effects                     |
| A12953 | Acute Toxicity                                            |
| A12954 | Acute Toxicity                                            |
| A12955 | Mutagenicity                                              |
| A12956 | Mutagenicity                                              |
| A12957 | Reproductive Effects                                      |
| A12958 | Reproductive Effects                                      |
| A12959 | Mutagenicity                                              |
| A12960 | Mutagenicity                                              |
| A12961 | Multiple Dose Effects                                     |
| A12962 | Tumorigenicity                                            |
| A12963 | Mutagenicity                                              |
| A12964 | Tumorigenicity                                            |
| A12965 | Mutagenicity                                              |
| A12966 | Mutagenicity                                              |
| A12967 | Mutagenicity, Tumorigenicity                              |
| A12968 | Acute Toxicity                                            |
| A12969 | Non-toxicity                                              |
| A12970 | Non-toxicity                                              |
| A12971 | Non-toxicity                                              |
| A12972 | Acute Toxicity                                            |
| A12973 | Non-toxicity                                              |
| A12974 | Acute Toxicity                                            |
| A12975 | Mutagenicity                                              |
| A12976 | Mutagenicity                                              |
| A12977 | Multiple Dose Effects                                     |
| A12978 | Acute Toxicity                                            |

|        |                                       |
|--------|---------------------------------------|
| A12979 | Mutagenicity                          |
| A12980 | Acute Toxicity                        |
| A12981 | Mutagenicity                          |
| A12982 | Mutagenicity                          |
| A12983 | Mutagenicity                          |
| A12984 | Mutagenicity                          |
| A12985 | Acute Toxicity, Multiple Dose Effects |
| A12986 | Acute Toxicity                        |
| A12987 | Acute Toxicity                        |
| A12988 | Acute Toxicity                        |
| A12989 | Acute Toxicity                        |
| A12990 | Acute Toxicity                        |
| A12991 | Mutagenicity                          |
| A12992 | Non-toxicity                          |
| A12993 | Acute Toxicity, Mutagenicity          |
| A12994 | Acute Toxicity                        |
| A12995 | Reproductive Effects                  |
| A12996 | Reproductive Effects                  |
| A12997 | Acute Toxicity                        |
| A12998 | Acute Toxicity                        |
| A12999 | Mutagenicity                          |
| A13000 | Acute Toxicity                        |
| A13001 | Acute Toxicity                        |
| A13002 | Acute Toxicity                        |
| A13003 | Acute Toxicity                        |
| A13004 | Acute Toxicity                        |
| A13005 | Skin and Eye Irritation               |
| A13006 | Acute Toxicity                        |
| A13007 | Acute Toxicity                        |
| A13008 | Acute Toxicity                        |
| A13009 | Mutagenicity                          |
| A13010 | Multiple Dose Effects                 |
| A13011 | Acute Toxicity                        |
| A13012 | Acute Toxicity                        |
| A13013 | Acute Toxicity                        |
| A13014 | Acute Toxicity                        |
| A13015 | Acute Toxicity                        |
| A13016 | Acute Toxicity                        |
| A13017 | Acute Toxicity, Reproductive Effects  |
| A13018 | Mutagenicity                          |
| A13019 | Acute Toxicity                        |
| A13020 | Mutagenicity                          |
| A13021 | Mutagenicity                          |
| A13022 | Reproductive Effects                  |
| A13023 | Acute Toxicity, Mutagenicity          |
| A13024 | Acute Toxicity                        |

|        |                                                                |
|--------|----------------------------------------------------------------|
| A13025 | Acute Toxicity                                                 |
| A13026 | Acute Toxicity, Skin and Eye Irritation, Multiple Dose Effects |
| A13027 | Acute Toxicity                                                 |
| A13028 | Acute Toxicity                                                 |
| A13029 | Acute Toxicity                                                 |
| A13030 | Acute Toxicity                                                 |
| A13031 | Acute Toxicity                                                 |
| A13032 | Acute Toxicity                                                 |
| A13033 | Acute Toxicity, Multiple Dose Effects                          |
| A13034 | Acute Toxicity, Skin and Eye Irritation                        |
| A13035 | Tumorigenicity                                                 |
| A13036 | Acute Toxicity                                                 |
| A13037 | Acute Toxicity                                                 |
| A13038 | Acute Toxicity                                                 |
| A13039 | Acute Toxicity                                                 |
| A13040 | Acute Toxicity                                                 |
| A13041 | Reproductive Effects                                           |
| A13042 | Acute Toxicity                                                 |
| A13043 | Acute Toxicity                                                 |
| A13044 | Acute Toxicity                                                 |
| A13045 | Acute Toxicity                                                 |
| A13046 | Acute Toxicity                                                 |
| A13047 | Acute Toxicity                                                 |
| A13048 | Reproductive Effects                                           |
| A13049 | Acute Toxicity                                                 |
| A13050 | Acute Toxicity                                                 |
| A13051 | Mutagenicity                                                   |
| A13052 | Acute Toxicity                                                 |
| A13053 | Mutagenicity                                                   |
| A13054 | Multiple Dose Effects                                          |
| A13055 | Mutagenicity                                                   |
| A13056 | Multiple Dose Effects                                          |
| A13057 | Acute Toxicity                                                 |
| A13058 | Acute Toxicity                                                 |
| A13059 | Acute Toxicity                                                 |
| A13060 | Acute Toxicity                                                 |
| A13061 | Acute Toxicity                                                 |
| A13062 | Acute Toxicity, Mutagenicity                                   |
| A13063 | Non-toxicity                                                   |
| A13064 | Mutagenicity                                                   |
| A13065 | Mutagenicity                                                   |
| A13066 | Acute Toxicity                                                 |
| A13067 | Acute Toxicity                                                 |
| A13068 | Acute Toxicity                                                 |
| A13069 | Acute Toxicity                                                 |
| A13070 | Acute Toxicity                                                 |

|        |                                                             |
|--------|-------------------------------------------------------------|
| A13071 | Acute Toxicity                                              |
| A13072 | Acute Toxicity                                              |
| A13073 | Acute Toxicity                                              |
| A13074 | Mutagenicity, Tumorigenicity                                |
| A13075 | Acute Toxicity                                              |
| A13076 | Acute Toxicity                                              |
| A13077 | Acute Toxicity                                              |
| A13078 | Acute Toxicity                                              |
| A13079 | Acute Toxicity                                              |
| A13080 | Acute Toxicity                                              |
| A13081 | Acute Toxicity                                              |
| A13082 | Mutagenicity                                                |
| A13083 | Acute Toxicity                                              |
| A13084 | Acute Toxicity, Skin and Eye Irritation                     |
| A13085 | Mutagenicity                                                |
| A13086 | Mutagenicity                                                |
| A13087 | Acute Toxicity                                              |
| A13088 | Acute Toxicity                                              |
| A13089 | Acute Toxicity                                              |
| A13090 | Acute Toxicity                                              |
| A13091 | Reproductive Effects, Multiple Dose Effects                 |
| A13092 | Acute Toxicity, Multiple Dose Effects                       |
| A13093 | Mutagenicity                                                |
| A13094 | Mutagenicity                                                |
| A13095 | Mutagenicity                                                |
| A13096 | Acute Toxicity                                              |
| A13097 | Acute Toxicity                                              |
| A13098 | Acute Toxicity                                              |
| A13099 | Acute Toxicity, Reproductive Effects, Multiple Dose Effects |
| A13100 | Mutagenicity                                                |
| A13101 | Mutagenicity                                                |
| A13102 | Mutagenicity                                                |
| A13103 | Acute Toxicity                                              |
| A13104 | Acute Toxicity                                              |
| A13105 | Multiple Dose Effects                                       |
| A13106 | Mutagenicity                                                |
| A13107 | Acute Toxicity                                              |
| A13108 | Acute Toxicity                                              |
| A13109 | Acute Toxicity                                              |
| A13110 | Multiple Dose Effects                                       |
| A13111 | Reproductive Effects, Multiple Dose Effects                 |
| A13112 | Mutagenicity                                                |
| A13113 | Mutagenicity                                                |
| A13114 | Mutagenicity                                                |
| A13115 | Acute Toxicity                                              |
| A13116 | Acute Toxicity                                              |

|        |                                                                        |
|--------|------------------------------------------------------------------------|
| A13117 | Reproductive Effects, Multiple Dose Effects                            |
| A13118 | Tumorigenicity                                                         |
| A13119 | Non-toxicity                                                           |
| A13120 | Mutagenicity                                                           |
| A13121 | Tumorigenicity                                                         |
| A13122 | Mutagenicity                                                           |
| A13123 | Mutagenicity                                                           |
| A13124 | Multiple Dose Effects                                                  |
| A13125 | Non-toxicity                                                           |
| A13126 | Non-toxicity                                                           |
| A13127 | Acute Toxicity                                                         |
| A13128 | Acute Toxicity                                                         |
| A13129 | Reproductive Effects                                                   |
| A13130 | Mutagenicity                                                           |
| A13131 | Acute Toxicity, Mutagenicity                                           |
| A13132 | Acute Toxicity                                                         |
| A13133 | Mutagenicity                                                           |
| A13134 | Acute Toxicity                                                         |
| A13135 | Acute Toxicity                                                         |
| A13136 | Acute Toxicity                                                         |
| A13137 | Acute Toxicity, Multiple Dose Effects                                  |
| A13138 | Mutagenicity                                                           |
| A13139 | Acute Toxicity                                                         |
| A13140 | Acute Toxicity                                                         |
| A13141 | Acute Toxicity                                                         |
| A13142 | Acute Toxicity                                                         |
| A13143 | Acute Toxicity                                                         |
| A13144 | Acute Toxicity                                                         |
| A13145 | Acute Toxicity                                                         |
| A13146 | Non-toxicity                                                           |
| A13147 | Acute Toxicity                                                         |
| A13148 | Acute Toxicity, Multiple Dose Effects                                  |
| A13149 | Non-toxicity                                                           |
| A13150 | Acute Toxicity                                                         |
| A13151 | Acute Toxicity                                                         |
| A13152 | Mutagenicity                                                           |
| A13153 | Multiple Dose Effects                                                  |
| A13154 | Acute Toxicity                                                         |
| A13155 | Acute Toxicity                                                         |
| A13156 | Acute Toxicity                                                         |
| A13157 | Acute Toxicity                                                         |
| A13158 | Acute Toxicity                                                         |
| A13159 | Acute Toxicity                                                         |
| A13160 | Acute Toxicity, Mutagenicity, Tumorigenicity, Skin and Eye Irritation, |
| A13161 | Multiple Dose Effects                                                  |
| A13162 | Acute Toxicity                                                         |

|        |                                                              |
|--------|--------------------------------------------------------------|
| A13163 | Acute Toxicity                                               |
| A13164 | Reproductive Effects                                         |
| A13165 | Acute Toxicity                                               |
| A13166 | Acute Toxicity                                               |
| A13167 | Acute Toxicity                                               |
| A13168 | Acute Toxicity                                               |
| A13169 | Acute Toxicity                                               |
| A13170 | Multiple Dose Effects                                        |
| A13171 | Multiple Dose Effects                                        |
| A13172 | Acute Toxicity                                               |
| A13173 | Mutagenicity                                                 |
| A13174 | Acute Toxicity                                               |
| A13175 | Acute Toxicity                                               |
| A13176 | Acute Toxicity                                               |
| A13177 | Acute Toxicity, Multiple Dose Effects                        |
| A13178 | Mutagenicity                                                 |
| A13179 | Skin and Eye Irritation                                      |
| A13180 | Mutagenicity, Skin and Eye Irritation, Multiple Dose Effects |
| A13181 | Acute Toxicity                                               |
| A13182 | Mutagenicity                                                 |
| A13183 | Acute Toxicity                                               |
| A13184 | Skin and Eye Irritation                                      |
| A13185 | Acute Toxicity                                               |
| A13186 | Acute Toxicity                                               |
| A13187 | Acute Toxicity                                               |
| A13188 | Acute Toxicity                                               |
| A13189 | Acute Toxicity                                               |
| A13190 | Acute Toxicity                                               |
| A13191 | Acute Toxicity                                               |
| A13192 | Acute Toxicity                                               |
| A13193 | Acute Toxicity                                               |
| A13194 | Acute Toxicity                                               |
| A13195 | Acute Toxicity                                               |
| A13196 | Acute Toxicity                                               |
| A13197 | Acute Toxicity                                               |
| A13198 | Acute Toxicity                                               |
| A13199 | Acute Toxicity                                               |
| A13200 | Acute Toxicity                                               |
| A13201 | Tumorigenicity                                               |
| A13202 | Acute Toxicity                                               |
| A13203 | Acute Toxicity                                               |
| A13204 | Acute Toxicity                                               |
| A13205 | Acute Toxicity                                               |
| A13206 | Mutagenicity                                                 |
| A13207 | Acute Toxicity                                               |
| A13208 | Acute Toxicity, Multiple Dose Effects                        |

|        |                                                                                                    |
|--------|----------------------------------------------------------------------------------------------------|
| A13209 | Mutagenicity                                                                                       |
| A13210 | Acute Toxicity                                                                                     |
| A13211 | Non-toxicity                                                                                       |
| A13212 | Acute Toxicity, Mutagenicity, Skin and Eye Irritation, Reproductive Effects, Multiple Dose Effects |
| A13213 | Acute Toxicity, Multiple Dose Effects                                                              |
| A13214 | Acute Toxicity                                                                                     |
| A13215 | Acute Toxicity, Mutagenicity                                                                       |
| A13216 | Non-toxicity                                                                                       |
| A13217 | Acute Toxicity                                                                                     |
| A13218 | Acute Toxicity                                                                                     |
| A13219 | Acute Toxicity                                                                                     |
| A13220 | Acute Toxicity                                                                                     |
| A13221 | Acute Toxicity                                                                                     |
| A13222 | Reproductive Effects, Multiple Dose Effects                                                        |
| A13223 | Mutagenicity                                                                                       |
| A13224 | Skin and Eye Irritation                                                                            |
| A13225 | Acute Toxicity                                                                                     |
| A13226 | Mutagenicity                                                                                       |
| A13227 | Acute Toxicity                                                                                     |
| A13228 | Acute Toxicity                                                                                     |
| A13229 | Mutagenicity, Multiple Dose Effects                                                                |
| A13230 | Acute Toxicity                                                                                     |
| A13231 | Acute Toxicity, Multiple Dose Effects                                                              |
| A13232 | Acute Toxicity                                                                                     |
| A13233 | Acute Toxicity                                                                                     |
| A13234 | Non-toxicity                                                                                       |
| A13235 | Multiple Dose Effects                                                                              |
| A13236 | Acute Toxicity                                                                                     |
| A13237 | Mutagenicity                                                                                       |
| A13238 | Mutagenicity, Tumorigenicity                                                                       |
| A13239 | Acute Toxicity                                                                                     |
| A13240 | Acute Toxicity                                                                                     |
| A13241 | Non-toxicity                                                                                       |
| A13242 | Mutagenicity                                                                                       |
| A13243 | Acute Toxicity                                                                                     |
| A13244 | Acute Toxicity                                                                                     |
| A13245 | Acute Toxicity                                                                                     |
| A13246 | Acute Toxicity                                                                                     |
| A13247 | Acute Toxicity                                                                                     |
| A13248 | Reproductive Effects                                                                               |
| A13249 | Acute Toxicity, Reproductive Effects                                                               |
| A13250 | Mutagenicity, Skin and Eye Irritation, Reproductive Effects, Multiple Dose                         |
| A13251 | Acute Toxicity                                                                                     |
| A13252 | Multiple Dose Effects                                                                              |
| A13253 | Acute Toxicity                                                                                     |

|        |                                         |
|--------|-----------------------------------------|
| A13254 | Acute Toxicity                          |
| A13255 | Non-toxicity                            |
| A13256 | Acute Toxicity                          |
| A13257 | Acute Toxicity                          |
| A13258 | Acute Toxicity                          |
| A13259 | Multiple Dose Effects                   |
| A13260 | Acute Toxicity                          |
| A13261 | Acute Toxicity                          |
| A13262 | Acute Toxicity                          |
| A13263 | Skin and Eye Irritation                 |
| A13264 | Acute Toxicity                          |
| A13265 | Acute Toxicity                          |
| A13266 | Acute Toxicity                          |
| A13267 | Acute Toxicity                          |
| A13268 | Skin and Eye Irritation                 |
| A13269 | Multiple Dose Effects                   |
| A13270 | Acute Toxicity                          |
| A13271 | Acute Toxicity                          |
| A13272 | Acute Toxicity                          |
| A13273 | Acute Toxicity                          |
| A13274 | Acute Toxicity                          |
| A13275 | Acute Toxicity                          |
| A13276 | Acute Toxicity                          |
| A13277 | Acute Toxicity                          |
| A13278 | Acute Toxicity                          |
| A13279 | Acute Toxicity                          |
| A13280 | Acute Toxicity                          |
| A13281 | Acute Toxicity                          |
| A13282 | Acute Toxicity, Reproductive Effects    |
| A13283 | Reproductive Effects                    |
| A13284 | Reproductive Effects                    |
| A13285 | Mutagenicity                            |
| A13286 | Acute Toxicity                          |
| A13287 | Acute Toxicity, Skin and Eye Irritation |
| A13288 | Skin and Eye Irritation                 |
| A13289 | Acute Toxicity                          |
| A13290 | Acute Toxicity                          |
| A13291 | Acute Toxicity                          |
| A13292 | Acute Toxicity                          |
| A13293 | Reproductive Effects                    |
| A13294 | Acute Toxicity                          |
| A13295 | Acute Toxicity, Multiple Dose Effects   |
| A13296 | Acute Toxicity                          |
| A13297 | Mutagenicity                            |
| A13298 | Acute Toxicity, Multiple Dose Effects   |
| A13299 | Acute Toxicity                          |



|        |                                                                             |
|--------|-----------------------------------------------------------------------------|
| A13300 | Mutagenicity                                                                |
| A13301 | Acute Toxicity                                                              |
| A13302 | Acute Toxicity, Multiple Dose Effects                                       |
| A13303 | Acute Toxicity                                                              |
| A13304 | Skin and Eye Irritation                                                     |
| A13305 | Mutagenicity                                                                |
| A13306 | Acute Toxicity                                                              |
| A13307 | Acute Toxicity                                                              |
| A13308 | Acute Toxicity                                                              |
| A13309 | Reproductive Effects, Multiple Dose Effects                                 |
| A13310 | Acute Toxicity                                                              |
| A13311 | Acute Toxicity, Multiple Dose Effects                                       |
| A13312 | Acute Toxicity                                                              |
| A13313 | Acute Toxicity, Multiple Dose Effects                                       |
| A13314 | Acute Toxicity, Tumorigenicity, Reproductive Effects, Multiple Dose Effects |
| A13315 | Acute Toxicity                                                              |
| A13316 | Acute Toxicity                                                              |
| A13317 | Multiple Dose Effects                                                       |
| A13318 | Acute Toxicity                                                              |
| A13319 | Acute Toxicity                                                              |
| A13320 | Acute Toxicity                                                              |
| A13321 | Multiple Dose Effects                                                       |
| A13322 | Reproductive Effects                                                        |
| A13323 | Multiple Dose Effects                                                       |
| A13324 | Acute Toxicity                                                              |
| A13325 | Acute Toxicity                                                              |
| A13326 | Reproductive Effects, Multiple Dose Effects                                 |
| A13327 | Reproductive Effects                                                        |
| A13328 | Acute Toxicity, Multiple Dose Effects                                       |
| A13329 | Reproductive Effects                                                        |
| A13330 | Acute Toxicity, Multiple Dose Effects                                       |
| A13331 | Acute Toxicity                                                              |
| A13332 | Acute Toxicity, Reproductive Effects, Multiple Dose Effects                 |
| A13333 | Acute Toxicity                                                              |
| A13334 | Mutagenicity                                                                |
| A13335 | Acute Toxicity                                                              |
| A13336 | Non-toxicity                                                                |
| A13337 | Mutagenicity                                                                |
| A13338 | Tumorigenicity, Multiple Dose Effects                                       |
| A13339 | Acute Toxicity                                                              |
| A13340 | Acute Toxicity, Multiple Dose Effects                                       |
| A13341 | Tumorigenicity                                                              |
| A13342 | Acute Toxicity                                                              |
| A13343 | Acute Toxicity                                                              |
| A13344 | Non-toxicity                                                                |
| A13345 | Acute Toxicity                                                              |

|        |                                                                             |
|--------|-----------------------------------------------------------------------------|
| A13346 | Acute Toxicity, Mutagenicity, Tumorigenicity, Skin and Eye Irritation,      |
| A13347 | Acute Toxicity, Tumorigenicity, Reproductive Effects, Multiple Dose Effects |
| A13348 | Acute Toxicity                                                              |
| A13349 | Mutagenicity                                                                |
| A13350 | Non-toxicity                                                                |
| A13351 | Mutagenicity, Tumorigenicity                                                |
| A13352 | Acute Toxicity                                                              |
| A13353 | Acute Toxicity                                                              |
| A13354 | Acute Toxicity                                                              |
| A13355 | Multiple Dose Effects                                                       |
| A13356 | Acute Toxicity                                                              |
| A13357 | Acute Toxicity                                                              |
| A13358 | Acute Toxicity                                                              |
| A13359 | Non-toxicity                                                                |
| A13360 | Acute Toxicity                                                              |
| A13361 | Acute Toxicity, Mutagenicity, Multiple Dose Effects                         |
| A13362 | Acute Toxicity, Reproductive Effects                                        |
| A13363 | Multiple Dose Effects                                                       |
| A13364 | Multiple Dose Effects                                                       |
| A13365 | Acute Toxicity                                                              |
| A13366 | Skin and Eye Irritation                                                     |
| A13367 | Multiple Dose Effects                                                       |
| A13368 | Non-toxicity                                                                |
| A13369 | Acute Toxicity, Mutagenicity, Tumorigenicity, Reproductive Effects,         |
| A13370 | Mutagenicity                                                                |
| A13371 | Mutagenicity                                                                |
| A13372 | Acute Toxicity                                                              |
| A13373 | Skin and Eye Irritation                                                     |
| A13374 | Acute Toxicity                                                              |
| A13375 | Multiple Dose Effects                                                       |
| A13376 | Acute Toxicity                                                              |
| A13377 | Acute Toxicity                                                              |
| A13378 | Mutagenicity                                                                |
| A13379 | Acute Toxicity                                                              |
| A13380 | Multiple Dose Effects                                                       |
| A13381 | Acute Toxicity, Multiple Dose Effects                                       |
| A13382 | Mutagenicity                                                                |
| A13383 | Acute Toxicity, Reproductive Effects                                        |
| A13384 | Acute Toxicity, Tumorigenicity, Multiple Dose Effects                       |
| A13385 | Multiple Dose Effects                                                       |
| A13386 | Acute Toxicity                                                              |
| A13387 | Acute Toxicity, Mutagenicity, Tumorigenicity, Reproductive Effects,         |
| A13388 | Acute Toxicity, Multiple Dose Effects                                       |
| A13389 | Acute Toxicity                                                              |
| A13390 | Non-toxicity                                                                |
| A13391 | Non-toxicity                                                                |

|        |                                                                |
|--------|----------------------------------------------------------------|
| A13392 | Skin and Eye Irritation                                        |
| A13393 | Non-toxicity                                                   |
| A13394 | Acute Toxicity                                                 |
| A13395 | Non-toxicity                                                   |
| A13396 | Mutagenicity                                                   |
| A13397 | Acute Toxicity, Reproductive Effects, Multiple Dose Effects    |
| A13398 | Acute Toxicity                                                 |
| A13399 | Multiple Dose Effects                                          |
| A13400 | Acute Toxicity                                                 |
| A13401 | Non-toxicity                                                   |
| A13402 | Multiple Dose Effects                                          |
| A13403 | Acute Toxicity                                                 |
| A13404 | Acute Toxicity                                                 |
| A13405 | Non-toxicity                                                   |
| A13406 | Multiple Dose Effects                                          |
| A13407 | Mutagenicity                                                   |
| A13408 | Mutagenicity                                                   |
| A13409 | Mutagenicity                                                   |
| A13410 | Mutagenicity                                                   |
| A13411 | Mutagenicity                                                   |
| A13412 | Mutagenicity                                                   |
| A13413 | Acute Toxicity                                                 |
| A13414 | Acute Toxicity                                                 |
| A13415 | Mutagenicity                                                   |
| A13416 | Acute Toxicity                                                 |
| A13417 | Acute Toxicity, Mutagenicity                                   |
| A13418 | Acute Toxicity                                                 |
| A13419 | Mutagenicity                                                   |
| A13420 | Reproductive Effects, Multiple Dose Effects                    |
| A13421 | Mutagenicity                                                   |
| A13422 | Mutagenicity                                                   |
| A13423 | Mutagenicity                                                   |
| A13424 | Acute Toxicity, Reproductive Effects                           |
| A13425 | Acute Toxicity                                                 |
| A13426 | Acute Toxicity                                                 |
| A13427 | Acute Toxicity                                                 |
| A13428 | Acute Toxicity, Multiple Dose Effects                          |
| A13429 | Acute Toxicity, Multiple Dose Effects                          |
| A13430 | Reproductive Effects                                           |
| A13431 | Acute Toxicity, Mutagenicity                                   |
| A13432 | Acute Toxicity                                                 |
| A13433 | Acute Toxicity, Skin and Eye Irritation, Multiple Dose Effects |
| A13434 | Reproductive Effects                                           |
| A13435 | Acute Toxicity                                                 |
| A13436 | Acute Toxicity, Skin and Eye Irritation                        |
| A13437 | Acute Toxicity                                                 |

|        |                                       |
|--------|---------------------------------------|
| A13438 | Acute Toxicity                        |
| A13439 | Acute Toxicity                        |
| A13440 | Acute Toxicity                        |
| A13441 | Acute Toxicity                        |
| A13442 | Acute Toxicity                        |
| A13443 | Acute Toxicity                        |
| A13444 | Acute Toxicity                        |
| A13445 | Acute Toxicity                        |
| A13446 | Acute Toxicity                        |
| A13447 | Acute Toxicity                        |
| A13448 | Acute Toxicity                        |
| A13449 | Acute Toxicity                        |
| A13450 | Acute Toxicity                        |
| A13451 | Acute Toxicity                        |
| A13452 | Acute Toxicity                        |
| A13453 | Mutagenicity                          |
| A13454 | Acute Toxicity                        |
| A13455 | Acute Toxicity                        |
| A13456 | Acute Toxicity, Multiple Dose Effects |
| A13457 | Acute Toxicity                        |
| A13458 | Acute Toxicity                        |
| A13459 | Acute Toxicity                        |
| A13460 | Acute Toxicity                        |
| A13461 | Acute Toxicity                        |
| A13462 | Acute Toxicity                        |
| A13463 | Acute Toxicity                        |
| A13464 | Acute Toxicity                        |
| A13465 | Acute Toxicity                        |
| A13466 | Acute Toxicity                        |
| A13467 | Acute Toxicity                        |
| A13468 | Reproductive Effects                  |
| A13469 | Acute Toxicity                        |
| A13470 | Acute Toxicity                        |
| A13471 | Acute Toxicity                        |
| A13472 | Acute Toxicity                        |
| A13473 | Acute Toxicity                        |
| A13474 | Acute Toxicity                        |
| A13475 | Acute Toxicity                        |
| A13476 | Acute Toxicity                        |
| A13477 | Acute Toxicity                        |
| A13478 | Acute Toxicity                        |
| A13479 | Multiple Dose Effects                 |
| A13480 | Acute Toxicity                        |
| A13481 | Acute Toxicity                        |
| A13482 | Multiple Dose Effects                 |
| A13483 | Acute Toxicity                        |

|        |                                                             |
|--------|-------------------------------------------------------------|
| A13484 | Acute Toxicity                                              |
| A13485 | Mutagenicity                                                |
| A13486 | Acute Toxicity                                              |
| A13487 | Acute Toxicity                                              |
| A13488 | Multiple Dose Effects                                       |
| A13489 | Acute Toxicity                                              |
| A13490 | Acute Toxicity, Reproductive Effects, Multiple Dose Effects |
| A13491 | Acute Toxicity                                              |
| A13492 | Acute Toxicity                                              |
| A13493 | Acute Toxicity                                              |
| A13494 | Acute Toxicity                                              |
| A13495 | Acute Toxicity, Mutagenicity                                |
| A13496 | Mutagenicity                                                |
| A13497 | Acute Toxicity                                              |
| A13498 | Acute Toxicity                                              |
| A13499 | Acute Toxicity                                              |
| A13500 | Acute Toxicity, Skin and Eye Irritation                     |
| A13501 | Acute Toxicity                                              |
| A13502 | Acute Toxicity                                              |
| A13503 | Mutagenicity                                                |
| A13504 | Acute Toxicity                                              |
| A13505 | Acute Toxicity                                              |
| A13506 | Acute Toxicity                                              |
| A13507 | Acute Toxicity                                              |
| A13508 | Acute Toxicity                                              |
| A13509 | Acute Toxicity                                              |
| A13510 | Acute Toxicity                                              |
| A13511 | Acute Toxicity, Skin and Eye Irritation                     |
| A13512 | Acute Toxicity                                              |
| A13513 | Tumorigenicity                                              |
| A13514 | Acute Toxicity                                              |
| A13515 | Acute Toxicity                                              |
| A13516 | Acute Toxicity                                              |
| A13517 | Acute Toxicity                                              |
| A13518 | Acute Toxicity                                              |
| A13519 | Acute Toxicity                                              |
| A13520 | Acute Toxicity                                              |
| A13521 | Acute Toxicity, Multiple Dose Effects                       |
| A13522 | Acute Toxicity                                              |
| A13523 | Acute Toxicity, Multiple Dose Effects                       |
| A13524 | Acute Toxicity                                              |
| A13525 | Acute Toxicity                                              |
| A13526 | Acute Toxicity                                              |
| A13527 | Acute Toxicity                                              |
| A13528 | Acute Toxicity, Multiple Dose Effects                       |
| A13529 | Acute Toxicity, Multiple Dose Effects                       |

|        |                                       |
|--------|---------------------------------------|
| A13530 | Acute Toxicity                        |
| A13531 | Acute Toxicity                        |
| A13532 | Acute Toxicity                        |
| A13533 | Acute Toxicity                        |
| A13534 | Acute Toxicity                        |
| A13535 | Acute Toxicity                        |
| A13536 | Acute Toxicity                        |
| A13537 | Acute Toxicity                        |
| A13538 | Acute Toxicity, Multiple Dose Effects |
| A13539 | Acute Toxicity                        |
| A13540 | Acute Toxicity                        |
| A13541 | Acute Toxicity                        |
| A13542 | Acute Toxicity                        |
| A13543 | Acute Toxicity                        |
| A13544 | Acute Toxicity                        |
| A13545 | Acute Toxicity                        |
| A13546 | Acute Toxicity                        |
| A13547 | Acute Toxicity                        |
| A13548 | Acute Toxicity                        |
| A13549 | Acute Toxicity                        |
| A13550 | Acute Toxicity                        |
| A13551 | Acute Toxicity                        |
| A13552 | Acute Toxicity                        |
| A13553 | Acute Toxicity, Multiple Dose Effects |
| A13554 | Acute Toxicity                        |
| A13555 | Acute Toxicity                        |
| A13556 | Acute Toxicity                        |
| A13557 | Acute Toxicity                        |
| A13558 | Acute Toxicity                        |
| A13559 | Acute Toxicity                        |
| A13560 | Acute Toxicity                        |
| A13561 | Acute Toxicity                        |
| A13562 | Acute Toxicity                        |
| A13563 | Acute Toxicity                        |
| A13564 | Acute Toxicity                        |
| A13565 | Acute Toxicity                        |
| A13566 | Acute Toxicity                        |
| A13567 | Acute Toxicity                        |
| A13568 | Reproductive Effects                  |
| A13569 | Acute Toxicity                        |
| A13570 | Acute Toxicity                        |
| A13571 | Acute Toxicity                        |
| A13572 | Acute Toxicity                        |
| A13573 | Acute Toxicity                        |
| A13574 | Acute Toxicity                        |
| A13575 | Acute Toxicity                        |

|        |                                         |
|--------|-----------------------------------------|
| A13576 | Acute Toxicity                          |
| A13577 | Acute Toxicity                          |
| A13578 | Acute Toxicity                          |
| A13579 | Acute Toxicity                          |
| A13580 | Acute Toxicity                          |
| A13581 | Acute Toxicity                          |
| A13582 | Acute Toxicity                          |
| A13583 | Acute Toxicity                          |
| A13584 | Acute Toxicity                          |
| A13585 | Acute Toxicity                          |
| A13586 | Acute Toxicity                          |
| A13587 | Acute Toxicity                          |
| A13588 | Acute Toxicity                          |
| A13589 | Acute Toxicity                          |
| A13590 | Acute Toxicity                          |
| A13591 | Acute Toxicity                          |
| A13592 | Acute Toxicity                          |
| A13593 | Acute Toxicity                          |
| A13594 | Acute Toxicity                          |
| A13595 | Acute Toxicity                          |
| A13596 | Acute Toxicity                          |
| A13597 | Acute Toxicity                          |
| A13598 | Acute Toxicity                          |
| A13599 | Acute Toxicity                          |
| A13600 | Acute Toxicity                          |
| A13601 | Acute Toxicity                          |
| A13602 | Acute Toxicity                          |
| A13603 | Acute Toxicity                          |
| A13604 | Acute Toxicity                          |
| A13605 | Acute Toxicity                          |
| A13606 | Acute Toxicity                          |
| A13607 | Acute Toxicity                          |
| A13608 | Acute Toxicity                          |
| A13609 | Acute Toxicity, Skin and Eye Irritation |
| A13610 | Acute Toxicity                          |
| A13611 | Acute Toxicity                          |
| A13612 | Acute Toxicity                          |
| A13613 | Acute Toxicity                          |
| A13614 | Acute Toxicity, Multiple Dose Effects   |
| A13615 | Acute Toxicity                          |
| A13616 | Acute Toxicity                          |
| A13617 | Acute Toxicity, Multiple Dose Effects   |
| A13618 | Acute Toxicity                          |
| A13619 | Acute Toxicity                          |
| A13620 | Acute Toxicity                          |
| A13621 | Acute Toxicity                          |

|        |                                       |
|--------|---------------------------------------|
| A13622 | Acute Toxicity                        |
| A13623 | Acute Toxicity                        |
| A13624 | Acute Toxicity, Multiple Dose Effects |
| A13625 | Acute Toxicity                        |
| A13626 | Acute Toxicity                        |
| A13627 | Acute Toxicity                        |
| A13628 | Acute Toxicity                        |
| A13629 | Acute Toxicity                        |
| A13630 | Acute Toxicity                        |
| A13631 | Acute Toxicity                        |
| A13632 | Acute Toxicity                        |
| A13633 | Acute Toxicity                        |
| A13634 | Acute Toxicity                        |
| A13635 | Acute Toxicity                        |
| A13636 | Acute Toxicity                        |
| A13637 | Acute Toxicity                        |
| A13638 | Acute Toxicity                        |
| A13639 | Acute Toxicity                        |
| A13640 | Acute Toxicity                        |
| A13641 | Acute Toxicity                        |
| A13642 | Acute Toxicity                        |
| A13643 | Acute Toxicity                        |
| A13644 | Acute Toxicity                        |
| A13645 | Acute Toxicity                        |
| A13646 | Acute Toxicity                        |
| A13647 | Acute Toxicity, Multiple Dose Effects |
| A13648 | Mutagenicity                          |
| A13649 | Acute Toxicity                        |
| A13650 | Acute Toxicity                        |
| A13651 | Acute Toxicity                        |
| A13652 | Acute Toxicity                        |
| A13653 | Acute Toxicity                        |
| A13654 | Acute Toxicity                        |
| A13655 | Acute Toxicity                        |
| A13656 | Acute Toxicity                        |
| A13657 | Acute Toxicity                        |
| A13658 | Acute Toxicity                        |
| A13659 | Acute Toxicity                        |
| A13660 | Acute Toxicity                        |
| A13661 | Mutagenicity                          |
| A13662 | Acute Toxicity                        |
| A13663 | Acute Toxicity                        |
| A13664 | Acute Toxicity                        |
| A13665 | Acute Toxicity                        |
| A13666 | Acute Toxicity                        |
| A13667 | Acute Toxicity                        |



|        |                                       |
|--------|---------------------------------------|
| A13668 | Acute Toxicity                        |
| A13669 | Acute Toxicity                        |
| A13670 | Acute Toxicity                        |
| A13671 | Acute Toxicity                        |
| A13672 | Acute Toxicity                        |
| A13673 | Acute Toxicity                        |
| A13674 | Acute Toxicity                        |
| A13675 | Acute Toxicity                        |
| A13676 | Acute Toxicity                        |
| A13677 | Acute Toxicity, Multiple Dose Effects |
| A13678 | Acute Toxicity                        |
| A13679 | Acute Toxicity                        |
| A13680 | Acute Toxicity                        |
| A13681 | Acute Toxicity                        |
| A13682 | Acute Toxicity                        |
| A13683 | Acute Toxicity, Mutagenicity          |
| A13684 | Acute Toxicity, Mutagenicity          |
| A13685 | Acute Toxicity                        |
| A13686 | Acute Toxicity                        |
| A13687 | Acute Toxicity                        |
| A13688 | Acute Toxicity                        |
| A13689 | Acute Toxicity                        |
| A13690 | Acute Toxicity                        |
| A13691 | Acute Toxicity                        |
| A13692 | Acute Toxicity                        |
| A13693 | Acute Toxicity                        |
| A13694 | Acute Toxicity                        |
| A13695 | Acute Toxicity                        |
| A13696 | Acute Toxicity                        |
| A13697 | Acute Toxicity                        |
| A13698 | Acute Toxicity                        |
| A13699 | Acute Toxicity                        |
| A13700 | Acute Toxicity                        |
| A13701 | Acute Toxicity                        |
| A13702 | Acute Toxicity                        |
| A13703 | Acute Toxicity                        |
| A13704 | Mutagenicity                          |
| A13705 | Acute Toxicity                        |
| A13706 | Multiple Dose Effects                 |
| A13707 | Acute Toxicity                        |
| A13708 | Multiple Dose Effects                 |
| A13709 | Acute Toxicity                        |
| A13710 | Acute Toxicity                        |
| A13711 | Acute Toxicity                        |
| A13712 | Acute Toxicity                        |
| A13713 | Acute Toxicity                        |

|        |                                                             |
|--------|-------------------------------------------------------------|
| A13714 | Acute Toxicity                                              |
| A13715 | Acute Toxicity                                              |
| A13716 | Acute Toxicity                                              |
| A13717 | Acute Toxicity, Reproductive Effects, Multiple Dose Effects |
| A13718 | Acute Toxicity                                              |
| A13719 | Acute Toxicity                                              |
| A13720 | Acute Toxicity                                              |
| A13721 | Acute Toxicity                                              |
| A13722 | Acute Toxicity                                              |
| A13723 | Acute Toxicity                                              |
| A13724 | Acute Toxicity                                              |
| A13725 | Tumorigenicity                                              |
| A13726 | Acute Toxicity, Multiple Dose Effects                       |
| A13727 | Acute Toxicity                                              |
| A13728 | Acute Toxicity, Multiple Dose Effects                       |
| A13729 | Reproductive Effects                                        |
| A13730 | Acute Toxicity                                              |
| A13731 | Acute Toxicity                                              |
| A13732 | Acute Toxicity                                              |
| A13733 | Acute Toxicity, Tumorigenicity                              |
| A13734 | Reproductive Effects, Multiple Dose Effects                 |
| A13735 | Acute Toxicity, Reproductive Effects, Multiple Dose Effects |
| A13736 | Mutagenicity, Multiple Dose Effects                         |
| A13737 | Reproductive Effects                                        |
| A13738 | Multiple Dose Effects                                       |
| A13739 | Acute Toxicity                                              |
| A13740 | Acute Toxicity                                              |
| A13741 | Acute Toxicity                                              |
| A13742 | Acute Toxicity                                              |
| A13743 | Acute Toxicity                                              |
| A13744 | Acute Toxicity                                              |
| A13745 | Mutagenicity                                                |
| A13746 | Acute Toxicity                                              |
| A13747 | Acute Toxicity                                              |
| A13748 | Acute Toxicity                                              |
| A13749 | Acute Toxicity                                              |
| A13750 | Acute Toxicity                                              |
| A13751 | Acute Toxicity, Multiple Dose Effects                       |
| A13752 | Acute Toxicity                                              |
| A13753 | Acute Toxicity                                              |
| A13754 | Acute Toxicity                                              |
| A13755 | Acute Toxicity, Skin and Eye Irritation                     |
| A13756 | Multiple Dose Effects                                       |
| A13757 | Acute Toxicity                                              |
| A13758 | Acute Toxicity                                              |
| A13759 | Acute Toxicity                                              |

|        |                                             |
|--------|---------------------------------------------|
| A13760 | Mutagenicity                                |
| A13761 | Acute Toxicity                              |
| A13762 | Acute Toxicity                              |
| A13763 | Acute Toxicity                              |
| A13764 | Acute Toxicity                              |
| A13765 | Acute Toxicity                              |
| A13766 | Mutagenicity                                |
| A13767 | Acute Toxicity                              |
| A13768 | Acute Toxicity                              |
| A13769 | Acute Toxicity                              |
| A13770 | Acute Toxicity                              |
| A13771 | Acute Toxicity                              |
| A13772 | Acute Toxicity                              |
| A13773 | Acute Toxicity                              |
| A13774 | Acute Toxicity                              |
| A13775 | Acute Toxicity                              |
| A13776 | Acute Toxicity                              |
| A13777 | Acute Toxicity                              |
| A13778 | Acute Toxicity, Mutagenicity                |
| A13779 | Acute Toxicity                              |
| A13780 | Acute Toxicity, Multiple Dose Effects       |
| A13781 | Multiple Dose Effects                       |
| A13782 | Acute Toxicity                              |
| A13783 | Multiple Dose Effects                       |
| A13784 | Reproductive Effects, Multiple Dose Effects |
| A13785 | Multiple Dose Effects                       |
| A13786 | Reproductive Effects, Multiple Dose Effects |
| A13787 | Acute Toxicity                              |
| A13788 | Multiple Dose Effects                       |
| A13789 | Acute Toxicity                              |
| A13790 | Mutagenicity                                |
| A13791 | Acute Toxicity                              |
| A13792 | Acute Toxicity                              |
| A13793 | Acute Toxicity                              |
| A13794 | Acute Toxicity                              |
| A13795 | Acute Toxicity                              |
| A13796 | Acute Toxicity                              |
| A13797 | Acute Toxicity, Skin and Eye Irritation     |
| A13798 | Acute Toxicity                              |
| A13799 | Acute Toxicity                              |
| A13800 | Acute Toxicity                              |
| A13801 | Acute Toxicity                              |
| A13802 | Acute Toxicity                              |
| A13803 | Acute Toxicity                              |
| A13804 | Acute Toxicity                              |
| A13805 | Acute Toxicity                              |

|        |                                                                             |
|--------|-----------------------------------------------------------------------------|
| A13806 | Multiple Dose Effects                                                       |
| A13807 | Acute Toxicity                                                              |
| A13808 | Acute Toxicity                                                              |
| A13809 | Acute Toxicity                                                              |
| A13810 | Non-toxicity                                                                |
| A13811 | Acute Toxicity, Tumorigenicity                                              |
| A13812 | Acute Toxicity                                                              |
| A13813 | Acute Toxicity                                                              |
| A13814 | Acute Toxicity, Mutagenicity, Reproductive Effects                          |
| A13815 | Tumorigenicity                                                              |
| A13816 | Acute Toxicity                                                              |
| A13817 | Acute Toxicity, Skin and Eye Irritation                                     |
| A13818 | Skin and Eye Irritation                                                     |
| A13819 | Acute Toxicity, Mutagenicity, Tumorigenicity, Reproductive Effects          |
| A13820 | Mutagenicity                                                                |
| A13821 | Acute Toxicity, Skin and Eye Irritation                                     |
| A13822 | Acute Toxicity                                                              |
| A13823 | Acute Toxicity                                                              |
| A13824 | Acute Toxicity, Mutagenicity, Tumorigenicity, Multiple Dose Effects         |
| A13825 | Acute Toxicity                                                              |
| A13826 | Acute Toxicity, Tumorigenicity, Reproductive Effects, Multiple Dose Effects |
| A13827 | Acute Toxicity, Mutagenicity, Tumorigenicity                                |
| A13828 | Acute Toxicity, Mutagenicity, Skin and Eye Irritation                       |
| A13829 | Acute Toxicity, Mutagenicity, Tumorigenicity, Reproductive Effects,         |
| A13830 | Acute Toxicity, Mutagenicity, Tumorigenicity, Reproductive Effects,         |
| A13831 | Mutagenicity, Reproductive Effects, Multiple Dose Effects                   |
| A13832 | Mutagenicity, Tumorigenicity, Multiple Dose Effects                         |
| A13833 | Tumorigenicity                                                              |
| A13834 | Acute Toxicity, Multiple Dose Effects                                       |
| A13835 | Skin and Eye Irritation, Reproductive Effects                               |
| A13836 | Acute Toxicity                                                              |
| A13837 | Acute Toxicity, Skin and Eye Irritation, Multiple Dose Effects              |
| A13838 | Acute Toxicity                                                              |
| A13839 | Mutagenicity, Tumorigenicity                                                |
| A13840 | Acute Toxicity                                                              |
| A13841 | Acute Toxicity                                                              |
| A13842 | Acute Toxicity                                                              |
| A13843 | Mutagenicity                                                                |
| A13844 | Acute Toxicity, Reproductive Effects                                        |
| A13845 | Acute Toxicity, Mutagenicity, Tumorigenicity, Reproductive Effects,         |
| A13846 | Acute Toxicity, Reproductive Effects                                        |
| A13847 | Multiple Dose Effects                                                       |
| A13848 | Mutagenicity                                                                |
| A13849 | Mutagenicity                                                                |
| A13850 | Multiple Dose Effects                                                       |
| A13851 | Mutagenicity                                                                |

|        |                                                                           |
|--------|---------------------------------------------------------------------------|
| A13852 | Acute Toxicity, Mutagenicity                                              |
| A13853 | Acute Toxicity                                                            |
| A13854 | Acute Toxicity                                                            |
| A13855 | Acute Toxicity, Mutagenicity, Reproductive Effects, Multiple Dose Effects |
| A13856 | Acute Toxicity                                                            |
| A13857 | Multiple Dose Effects                                                     |
| A13858 | Acute Toxicity, Skin and Eye Irritation, Reproductive Effects             |
| A13859 | Reproductive Effects                                                      |
| A13860 | Acute Toxicity, Mutagenicity, Tumorigenicity, Multiple Dose Effects       |
| A13861 | Acute Toxicity                                                            |
| A13862 | Acute Toxicity                                                            |
| A13863 | Acute Toxicity                                                            |
| A13864 | Acute Toxicity, Reproductive Effects                                      |
| A13865 | Acute Toxicity, Mutagenicity                                              |
| A13866 | Acute Toxicity, Mutagenicity, Reproductive Effects, Multiple Dose Effects |
| A13867 | Reproductive Effects, Multiple Dose Effects                               |
| A13868 | Acute Toxicity, Mutagenicity                                              |
| A13869 | Mutagenicity                                                              |
| A13870 | Acute Toxicity                                                            |
| A13871 | Acute Toxicity, Mutagenicity, Reproductive Effects, Multiple Dose Effects |
| A13872 | Acute Toxicity, Mutagenicity, Skin and Eye Irritation                     |
| A13873 | Reproductive Effects                                                      |
| A13874 | Mutagenicity, Tumorigenicity, Reproductive Effects, Multiple Dose Effects |
| A13875 | Acute Toxicity                                                            |
| A13876 | Acute Toxicity, Skin and Eye Irritation                                   |
| A13877 | Acute Toxicity                                                            |
| A13878 | Reproductive Effects                                                      |
| A13879 | Acute Toxicity, Mutagenicity, Multiple Dose Effects                       |
| A13880 | Multiple Dose Effects                                                     |
| A13881 | Tumorigenicity, Reproductive Effects, Multiple Dose Effects               |
| A13882 | Tumorigenicity, Reproductive Effects                                      |
| A13883 | Acute Toxicity                                                            |
| A13884 | Acute Toxicity, Tumorigenicity                                            |
| A13885 | Acute Toxicity, Mutagenicity, Tumorigenicity                              |
| A13886 | Acute Toxicity, Mutagenicity, Multiple Dose Effects                       |
| A13887 | Acute Toxicity, Reproductive Effects                                      |
| A13888 | Acute Toxicity                                                            |
| A13889 | Acute Toxicity                                                            |
| A13890 | Mutagenicity, Tumorigenicity                                              |
| A13891 | Reproductive Effects, Multiple Dose Effects                               |
| A13892 | Acute Toxicity, Reproductive Effects, Multiple Dose Effects               |
| A13893 | Mutagenicity, Skin and Eye Irritation                                     |
| A13894 | Mutagenicity, Multiple Dose Effects                                       |
| A13895 | Mutagenicity, Multiple Dose Effects                                       |
| A13896 | Acute Toxicity                                                            |
| A13897 | Acute Toxicity                                                            |

|        |                                                                           |
|--------|---------------------------------------------------------------------------|
| A13898 | Acute Toxicity                                                            |
| A13899 | Acute Toxicity, Multiple Dose Effects                                     |
| A13900 | Acute Toxicity                                                            |
| A13901 | Acute Toxicity                                                            |
| A13902 | Mutagenicity                                                              |
| A13903 | Acute Toxicity, Mutagenicity                                              |
| A13904 | Acute Toxicity                                                            |
| A13905 | Acute Toxicity, Mutagenicity, Multiple Dose Effects                       |
| A13906 | Acute Toxicity, Mutagenicity, Tumorigenicity, Multiple Dose Effects       |
| A13907 | Acute Toxicity, Skin and Eye Irritation                                   |
| A13908 | Acute Toxicity                                                            |
| A13909 | Acute Toxicity                                                            |
| A13910 | Acute Toxicity                                                            |
| A13911 | Mutagenicity                                                              |
| A13912 | Acute Toxicity, Multiple Dose Effects                                     |
| A13913 | Non-toxicity                                                              |
| A13914 | Acute Toxicity, Mutagenicity, Skin and Eye Irritation                     |
| A13915 | Acute Toxicity, Multiple Dose Effects                                     |
| A13916 | Acute Toxicity                                                            |
| A13917 | Acute Toxicity, Mutagenicity, Multiple Dose Effects                       |
| A13918 | Acute Toxicity                                                            |
| A13919 | Acute Toxicity                                                            |
| A13920 | Acute Toxicity                                                            |
| A13921 | Skin and Eye Irritation                                                   |
| A13922 | Mutagenicity                                                              |
| A13923 | Acute Toxicity, Multiple Dose Effects                                     |
| A13924 | Mutagenicity                                                              |
| A13925 | Acute Toxicity                                                            |
| A13926 | Acute Toxicity, Mutagenicity, Multiple Dose Effects                       |
| A13927 | Acute Toxicity                                                            |
| A13928 | Acute Toxicity, Multiple Dose Effects                                     |
| A13929 | Acute Toxicity, Mutagenicity, Reproductive Effects, Multiple Dose Effects |
| A13930 | Acute Toxicity                                                            |
| A13931 | Mutagenicity                                                              |
| A13932 | Acute Toxicity, Mutagenicity                                              |
| A13933 | Acute Toxicity, Mutagenicity                                              |
| A13934 | Acute Toxicity                                                            |
| A13935 | Mutagenicity                                                              |
| A13936 | Acute Toxicity, Mutagenicity                                              |
| A13937 | Multiple Dose Effects                                                     |
| A13938 | Acute Toxicity, Mutagenicity                                              |
| A13939 | Acute Toxicity, Mutagenicity                                              |
| A13940 | Tumorigenicity                                                            |
| A13941 | Mutagenicity                                                              |
| A13942 | Acute Toxicity, Mutagenicity, Tumorigenicity                              |
| A13943 | Acute Toxicity                                                            |

|        |                                                           |
|--------|-----------------------------------------------------------|
| A13944 | Mutagenicity, Multiple Dose Effects                       |
| A13945 | Acute Toxicity, Tumorigenicity                            |
| A13946 | Acute Toxicity                                            |
| A13947 | Acute Toxicity                                            |
| A13948 | Reproductive Effects, Multiple Dose Effects               |
| A13949 | Acute Toxicity, Multiple Dose Effects                     |
| A13950 | Acute Toxicity                                            |
| A13951 | Mutagenicity                                              |
| A13952 | Acute Toxicity                                            |
| A13953 | Mutagenicity                                              |
| A13954 | Acute Toxicity                                            |
| A13955 | Acute Toxicity                                            |
| A13956 | Acute Toxicity                                            |
| A13957 | Acute Toxicity                                            |
| A13958 | Non-toxicity                                              |
| A13959 | Mutagenicity, Multiple Dose Effects                       |
| A13960 | Acute Toxicity                                            |
| A13961 | Acute Toxicity                                            |
| A13962 | Non-toxicity                                              |
| A13963 | Acute Toxicity, Multiple Dose Effects                     |
| A13964 | Acute Toxicity                                            |
| A13965 | Multiple Dose Effects                                     |
| A13966 | Acute Toxicity                                            |
| A13967 | Mutagenicity, Multiple Dose Effects                       |
| A13968 | Multiple Dose Effects                                     |
| A13969 | Multiple Dose Effects                                     |
| A13970 | Acute Toxicity, Skin and Eye Irritation                   |
| A13971 | Acute Toxicity                                            |
| A13972 | Acute Toxicity, Mutagenicity, Tumorigenicity              |
| A13973 | Acute Toxicity, Skin and Eye Irritation                   |
| A13974 | Acute Toxicity                                            |
| A13975 | Non-toxicity                                              |
| A13976 | Multiple Dose Effects                                     |
| A13977 | Acute Toxicity, Mutagenicity                              |
| A13978 | Mutagenicity                                              |
| A13979 | Acute Toxicity                                            |
| A13980 | Non-toxicity                                              |
| A13981 | Acute Toxicity                                            |
| A13982 | Non-toxicity                                              |
| A13983 | Non-toxicity                                              |
| A13984 | Non-toxicity                                              |
| A13985 | Non-toxicity                                              |
| A13986 | Reproductive Effects                                      |
| A13987 | Mutagenicity, Reproductive Effects, Multiple Dose Effects |
| A13988 | Skin and Eye Irritation, Multiple Dose Effects            |

|        |                                                                                                    |
|--------|----------------------------------------------------------------------------------------------------|
| A13989 | Acute Toxicity, Mutagenicity, Skin and Eye Irritation, Reproductive Effects, Multiple Dose Effects |
| A13990 | Non-toxicity                                                                                       |
| A13991 | Non-toxicity                                                                                       |
| A13992 | Acute Toxicity, Mutagenicity, Reproductive Effects, Multiple Dose Effects                          |
| A13993 | Acute Toxicity, Reproductive Effects, Multiple Dose Effects                                        |
| A13994 | Non-toxicity                                                                                       |
| A13995 | Acute Toxicity                                                                                     |
| A13996 | Non-toxicity                                                                                       |
| A13997 | Acute Toxicity, Mutagenicity                                                                       |
| A13998 | Non-toxicity                                                                                       |
| A13999 | Non-toxicity                                                                                       |
| A14000 | Acute Toxicity, Mutagenicity, Multiple Dose Effects                                                |
| A14001 | Non-toxicity                                                                                       |
| A14002 | Acute Toxicity                                                                                     |
| A14003 | Tumorigenicity                                                                                     |
| A14004 | Non-toxicity                                                                                       |
| A14005 | Mutagenicity                                                                                       |
| A14006 | Acute Toxicity, Mutagenicity, Multiple Dose Effects                                                |
| A14007 | Acute Toxicity                                                                                     |
| A14008 | Acute Toxicity                                                                                     |
| A14009 | Acute Toxicity, Mutagenicity, Skin and Eye Irritation, Reproductive Effects                        |
| A14010 | Acute Toxicity, Mutagenicity, Multiple Dose Effects                                                |
| A14011 | Multiple Dose Effects                                                                              |
| A14012 | Acute Toxicity, Skin and Eye Irritation                                                            |
| A14013 | Non-toxicity                                                                                       |
| A14014 | Acute Toxicity                                                                                     |
| A14015 | Non-toxicity                                                                                       |
| A14016 | Acute Toxicity, Reproductive Effects                                                               |
| A14017 | Acute Toxicity                                                                                     |
| A14018 | Acute Toxicity                                                                                     |
| A14019 | Mutagenicity                                                                                       |
| A14020 | Non-toxicity                                                                                       |
| A14021 | Non-toxicity                                                                                       |
| A14022 | Non-toxicity                                                                                       |
| A14023 | Non-toxicity                                                                                       |
| A14024 | Acute Toxicity, Multiple Dose Effects                                                              |
| A14025 | Non-toxicity                                                                                       |
| A14026 | Acute Toxicity, Mutagenicity                                                                       |
| A14027 | Non-toxicity                                                                                       |
| A14028 | Non-toxicity                                                                                       |
| A14029 | Mutagenicity                                                                                       |
| A14030 | Non-toxicity                                                                                       |
| A14031 | Non-toxicity                                                                                       |
| A14032 | Non-toxicity                                                                                       |
| A14033 | Non-toxicity                                                                                       |



|        |                                                                              |
|--------|------------------------------------------------------------------------------|
| A14034 | Non-toxicity                                                                 |
| A14035 | Non-toxicity                                                                 |
| A14036 | Mutagenicity                                                                 |
| A14037 | Mutagenicity                                                                 |
| A14038 | Non-toxicity                                                                 |
| A14039 | Acute Toxicity                                                               |
| A14040 | Non-toxicity                                                                 |
| A14041 | Acute Toxicity                                                               |
| A14042 | Non-toxicity                                                                 |
| A14043 | Non-toxicity                                                                 |
| A14044 | Non-toxicity                                                                 |
| A14045 | Non-toxicity                                                                 |
| A14046 | Non-toxicity                                                                 |
| A14047 | Non-toxicity                                                                 |
| A14048 | Mutagenicity, Reproductive Effects                                           |
| A14049 | Acute Toxicity                                                               |
| A14050 | Non-toxicity                                                                 |
| A14051 | Mutagenicity                                                                 |
| A14052 | Mutagenicity                                                                 |
| A14053 | Non-toxicity                                                                 |
| A14054 | Mutagenicity                                                                 |
| A14055 | Acute Toxicity                                                               |
| A14056 | Acute Toxicity, Mutagenicity, Multiple Dose Effects                          |
| A14057 | Non-toxicity                                                                 |
| A14058 | Multiple Dose Effects                                                        |
| A14059 | Non-toxicity                                                                 |
| A14060 | Non-toxicity                                                                 |
| A14061 | Non-toxicity                                                                 |
| A14062 | Non-toxicity                                                                 |
| A14063 | Non-toxicity                                                                 |
| A14064 | Non-toxicity                                                                 |
| A14065 | Non-toxicity                                                                 |
| A14066 | Non-toxicity                                                                 |
| A14067 | Non-toxicity                                                                 |
| A14068 | Non-toxicity                                                                 |
| A14069 | Non-toxicity                                                                 |
| A14070 | Acute Toxicity, Reproductive Effects                                         |
| A14071 | Acute Toxicity, Mutagenicity, Tumorigenicity, Skin and Eye Irritation,       |
| A14072 | Acute Toxicity, Mutagenicity, Reproductive Effects                           |
| A14073 | Acute Toxicity, Mutagenicity, Reproductive Effects                           |
| A14074 | Acute Toxicity, Mutagenicity, Skin and Eye Irritation, Multiple Dose Effects |
| A14075 | Non-toxicity                                                                 |
| A14076 | Acute Toxicity                                                               |
| A14077 | Acute Toxicity, Mutagenicity, Tumorigenicity, Skin and Eye Irritation,       |
| A14078 | Non-toxicity                                                                 |
| A14079 | Acute Toxicity, Skin and Eye Irritation, Multiple Dose Effects               |

|        |                                                                                                      |
|--------|------------------------------------------------------------------------------------------------------|
| A14080 | Acute Toxicity, Tumorigenicity, Skin and Eye Irritation, Reproductive Effects, Multiple Dose Effects |
| A14081 | Non-toxicity                                                                                         |
| A14082 | Mutagenicity                                                                                         |
| A14083 | Acute Toxicity                                                                                       |
| A14084 | Mutagenicity                                                                                         |
| A14085 | Acute Toxicity, Multiple Dose Effects                                                                |
| A14086 | Acute Toxicity                                                                                       |
| A14087 | Non-toxicity                                                                                         |
| A14088 | Acute Toxicity, Skin and Eye Irritation, Reproductive Effects, Multiple Dose                         |
| A14089 | Non-toxicity                                                                                         |
| A14090 | Non-toxicity                                                                                         |
| A14091 | Acute Toxicity, Multiple Dose Effects                                                                |
| A14092 | Skin and Eye Irritation                                                                              |
| A14093 | Non-toxicity                                                                                         |
| A14094 | Multiple Dose Effects                                                                                |
| A14095 | Acute Toxicity, Mutagenicity, Reproductive Effects, Multiple Dose Effects                            |
| A14096 | Acute Toxicity, Multiple Dose Effects                                                                |
| A14097 | Acute Toxicity, Mutagenicity, Multiple Dose Effects                                                  |
| A14098 | Acute Toxicity                                                                                       |
| A14099 | Acute Toxicity                                                                                       |
| A14100 | Acute Toxicity                                                                                       |
| A14101 | Acute Toxicity                                                                                       |
| A14102 | Acute Toxicity                                                                                       |
| A14103 | Acute Toxicity, Mutagenicity                                                                         |
| A14104 | Multiple Dose Effects                                                                                |
| A14105 | Acute Toxicity                                                                                       |
| A14106 | Acute Toxicity                                                                                       |
| A14107 | Acute Toxicity                                                                                       |
| A14108 | Acute Toxicity                                                                                       |
| A14109 | Acute Toxicity, Multiple Dose Effects                                                                |
| A14110 | Acute Toxicity                                                                                       |
| A14111 | Tumorigenicity, Skin and Eye Irritation, Multiple Dose Effects                                       |
| A14112 | Skin and Eye Irritation                                                                              |
| A14113 | Mutagenicity, Tumorigenicity, Skin and Eye Irritation, Reproductive Effects                          |
| A14114 | Acute Toxicity                                                                                       |
| A14115 | Acute Toxicity                                                                                       |
| A14116 | Skin and Eye Irritation                                                                              |
| A14117 | Skin and Eye Irritation                                                                              |
| A14118 | Acute Toxicity, Multiple Dose Effects                                                                |
| A14119 | Mutagenicity                                                                                         |
| A14120 | Acute Toxicity, Mutagenicity                                                                         |
| A14121 | Acute Toxicity                                                                                       |
| A14122 | Acute Toxicity, Multiple Dose Effects                                                                |
| A14123 | Acute Toxicity                                                                                       |
| A14124 | Acute Toxicity, Mutagenicity                                                                         |

|        |                                                                           |
|--------|---------------------------------------------------------------------------|
| A14125 | Acute Toxicity, Mutagenicity, Multiple Dose Effects                       |
| A14126 | Multiple Dose Effects                                                     |
| A14127 | Mutagenicity, Tumorigenicity                                              |
| A14128 | Acute Toxicity, Mutagenicity, Tumorigenicity, Reproductive Effects,       |
| A14129 | Acute Toxicity, Tumorigenicity, Multiple Dose Effects                     |
| A14130 | Acute Toxicity                                                            |
| A14131 | Acute Toxicity, Reproductive Effects                                      |
| A14132 | Acute Toxicity, Mutagenicity                                              |
| A14133 | Multiple Dose Effects                                                     |
| A14134 | Mutagenicity                                                              |
| A14135 | Acute Toxicity, Mutagenicity, Tumorigenicity                              |
| A14136 | Acute Toxicity                                                            |
| A14137 | Acute Toxicity                                                            |
| A14138 | Acute Toxicity, Reproductive Effects                                      |
| A14139 | Tumorigenicity                                                            |
| A14140 | Acute Toxicity, Multiple Dose Effects                                     |
| A14141 | Acute Toxicity                                                            |
| A14142 | Acute Toxicity                                                            |
| A14143 | Acute Toxicity, Reproductive Effects, Multiple Dose Effects               |
| A14144 | Acute Toxicity, Mutagenicity                                              |
| A14145 | Multiple Dose Effects                                                     |
| A14146 | Acute Toxicity                                                            |
| A14147 | Acute Toxicity, Multiple Dose Effects                                     |
| A14148 | Acute Toxicity                                                            |
| A14149 | Multiple Dose Effects                                                     |
| A14150 | Acute Toxicity, Tumorigenicity, Reproductive Effects                      |
| A14151 | Acute Toxicity, Mutagenicity                                              |
| A14152 | Acute Toxicity                                                            |
| A14153 | Acute Toxicity, Reproductive Effects                                      |
| A14154 | Acute Toxicity, Skin and Eye Irritation, Reproductive Effects             |
| A14155 | Non-toxicity                                                              |
| A14156 | Acute Toxicity, Mutagenicity                                              |
| A14157 | Non-toxicity                                                              |
| A14158 | Skin and Eye Irritation                                                   |
| A14159 | Acute Toxicity                                                            |
| A14160 | Acute Toxicity, Mutagenicity                                              |
| A14161 | Acute Toxicity, Multiple Dose Effects                                     |
| A14162 | Mutagenicity                                                              |
| A14163 | Acute Toxicity, Mutagenicity, Reproductive Effects, Multiple Dose Effects |
| A14164 | Non-toxicity                                                              |
| A14165 | Acute Toxicity, Reproductive Effects, Multiple Dose Effects               |
| A14166 | Acute Toxicity, Reproductive Effects, Multiple Dose Effects               |
| A14167 | Acute Toxicity, Multiple Dose Effects                                     |
| A14168 | Acute Toxicity, Mutagenicity, Multiple Dose Effects                       |
| A14169 | Acute Toxicity                                                            |
| A14170 | Acute Toxicity, Skin and Eye Irritation, Reproductive Effects             |

|        |                                                                                                 |
|--------|-------------------------------------------------------------------------------------------------|
| A14171 | Acute Toxicity, Skin and Eye Irritation, Reproductive Effects, Multiple Dose                    |
| A14172 | Non-toxicity                                                                                    |
| A14173 | Acute Toxicity, Mutagenicity, Skin and Eye Irritation, Multiple Dose Effects                    |
| A14174 | Acute Toxicity, Tumorigenicity, Reproductive Effects                                            |
| A14175 | Acute Toxicity, Reproductive Effects, Multiple Dose Effects                                     |
| A14176 | Acute Toxicity, Reproductive Effects, Multiple Dose Effects                                     |
| A14177 | Acute Toxicity, Skin and Eye Irritation, Multiple Dose Effects                                  |
| A14178 | Acute Toxicity, Reproductive Effects, Multiple Dose Effects                                     |
| A14179 | Acute Toxicity, Skin and Eye Irritation                                                         |
| A14180 | Acute Toxicity, Skin and Eye Irritation                                                         |
| A14181 | Non-toxicity                                                                                    |
| A14182 | Multiple Dose Effects                                                                           |
| A14183 | Non-toxicity                                                                                    |
| A14184 | Acute Toxicity, Reproductive Effects, Multiple Dose Effects                                     |
| A14185 | Non-toxicity                                                                                    |
| A14186 | Acute Toxicity, Skin and Eye Irritation, Reproductive Effects, Multiple Dose                    |
| A14187 | Acute Toxicity, Mutagenicity                                                                    |
| A14188 | Acute Toxicity, Mutagenicity, Skin and Eye Irritation, Multiple Dose Effects                    |
| A14189 | Non-toxicity                                                                                    |
| A14190 | Acute Toxicity, Mutagenicity, Tumorigenicity, Skin and Eye Irritation,<br>Multiple Dose Effects |
| A14191 | Tumorigenicity                                                                                  |
| A14192 | Mutagenicity, Reproductive Effects, Multiple Dose Effects                                       |
| A14193 | Acute Toxicity, Mutagenicity, Tumorigenicity, Skin and Eye Irritation,                          |
| A14194 | Non-toxicity                                                                                    |
| A14195 | Mutagenicity, Tumorigenicity, Multiple Dose Effects                                             |
| A14196 | Acute Toxicity, Mutagenicity, Tumorigenicity, Skin and Eye Irritation,                          |
| A14197 | Acute Toxicity, Multiple Dose Effects                                                           |
| A14198 | Acute Toxicity, Mutagenicity, Tumorigenicity, Skin and Eye Irritation,<br>Multiple Dose Effects |
| A14199 | Acute Toxicity, Mutagenicity, Skin and Eye Irritation, Multiple Dose Effects                    |
| A14200 | Acute Toxicity, Mutagenicity                                                                    |
| A14201 | Acute Toxicity                                                                                  |
| A14202 | Acute Toxicity, Mutagenicity, Tumorigenicity, Reproductive Effects,                             |
| A14203 | Multiple Dose Effects                                                                           |
| A14204 | Acute Toxicity, Mutagenicity, Tumorigenicity, Skin and Eye Irritation,                          |
| A14205 | Multiple Dose Effects                                                                           |
| A14206 | Acute Toxicity                                                                                  |
| A14207 | Tumorigenicity                                                                                  |
| A14208 | Acute Toxicity, Mutagenicity, Tumorigenicity, Skin and Eye Irritation,<br>Multiple Dose Effects |
| A14209 | Acute Toxicity, Tumorigenicity, Reproductive Effects, Multiple Dose Effects                     |
| A14210 | Acute Toxicity, Mutagenicity, Tumorigenicity, Skin and Eye Irritation,                          |
| A14211 | Acute Toxicity, Mutagenicity, Tumorigenicity                                                    |
| A14212 | Multiple Dose Effects                                                                           |
| A14213 | Multiple Dose Effects                                                                           |

|        |                                                                                              |
|--------|----------------------------------------------------------------------------------------------|
| A14214 | Non-toxicity                                                                                 |
| A14215 | Acute Toxicity                                                                               |
| A14216 | Acute Toxicity, Skin and Eye Irritation, Reproductive Effects, Multiple Dose                 |
| A14217 | Non-toxicity                                                                                 |
| A14218 | Acute Toxicity, Tumorigenicity, Multiple Dose Effects                                        |
| A14219 | Multiple Dose Effects                                                                        |
| A14220 | Acute Toxicity                                                                               |
| A14221 | Acute Toxicity, Mutagenicity, Tumorigenicity, Multiple Dose Effects                          |
| A14222 | Acute Toxicity, Mutagenicity, Reproductive Effects, Multiple Dose Effects                    |
| A14223 | Acute Toxicity, Skin and Eye Irritation                                                      |
| A14224 | Acute Toxicity, Skin and Eye Irritation, Multiple Dose Effects                               |
| A14225 | Non-toxicity                                                                                 |
| A14226 | Mutagenicity                                                                                 |
| A14227 | Acute Toxicity, Mutagenicity, Multiple Dose Effects                                          |
| A14228 | Acute Toxicity                                                                               |
| A14229 | Acute Toxicity, Mutagenicity, Tumorigenicity, Multiple Dose Effects                          |
| A14230 | Non-toxicity                                                                                 |
| A14231 | Non-toxicity                                                                                 |
| A14232 | Acute Toxicity                                                                               |
| A14233 | Acute Toxicity                                                                               |
| A14234 | Acute Toxicity                                                                               |
| A14235 | Multiple Dose Effects                                                                        |
| A14236 | Acute Toxicity, Mutagenicity, Tumorigenicity, Skin and Eye Irritation, Multiple Dose Effects |
| A14237 | Acute Toxicity, Multiple Dose Effects                                                        |
| A14238 | Multiple Dose Effects                                                                        |
| A14239 | Acute Toxicity, Skin and Eye Irritation, Multiple Dose Effects                               |
| A14240 | Acute Toxicity                                                                               |
| A14241 | Acute Toxicity                                                                               |
| A14242 | Non-toxicity                                                                                 |
| A14243 | Acute Toxicity, Multiple Dose Effects                                                        |
| A14244 | Multiple Dose Effects                                                                        |
| A14245 | Non-toxicity                                                                                 |
| A14246 | Acute Toxicity, Mutagenicity, Reproductive Effects                                           |
| A14247 | Acute Toxicity, Mutagenicity, Tumorigenicity, Reproductive Effects,                          |
| A14248 | Acute Toxicity, Tumorigenicity                                                               |
| A14249 | Acute Toxicity, Multiple Dose Effects                                                        |
| A14250 | Mutagenicity                                                                                 |
| A14251 | Acute Toxicity                                                                               |
| A14252 | Non-toxicity                                                                                 |
| A14253 | Acute Toxicity, Tumorigenicity, Multiple Dose Effects                                        |
| A14254 | Multiple Dose Effects                                                                        |
| A14255 | Acute Toxicity, Multiple Dose Effects                                                        |
| A14256 | Acute Toxicity, Multiple Dose Effects                                                        |
| A14257 | Multiple Dose Effects                                                                        |
| A14258 | Tumorigenicity                                                                               |

|        |                                                                                                       |
|--------|-------------------------------------------------------------------------------------------------------|
| A14259 | Non-toxicity                                                                                          |
| A14260 | Multiple Dose Effects                                                                                 |
| A14261 | Acute Toxicity, Multiple Dose Effects                                                                 |
| A14262 | Mutagenicity                                                                                          |
| A14263 | Acute Toxicity, Mutagenicity, Tumorigenicity, Reproductive Effects,                                   |
| A14264 | Acute Toxicity, Reproductive Effects, Multiple Dose Effects                                           |
| A14265 | Mutagenicity, Tumorigenicity, Skin and Eye Irritation                                                 |
| A14266 | Acute Toxicity, Mutagenicity, Reproductive Effects, Multiple Dose Effects                             |
| A14267 | Acute Toxicity                                                                                        |
| A14268 | Non-toxicity                                                                                          |
| A14269 | Non-toxicity                                                                                          |
| A14270 | Acute Toxicity, Multiple Dose Effects                                                                 |
| A14271 | Acute Toxicity, Mutagenicity, Multiple Dose Effects                                                   |
| A14272 | Acute Toxicity, Mutagenicity, Skin and Eye Irritation, Reproductive Effects,<br>Multiple Dose Effects |
| A14273 | Skin and Eye Irritation, Reproductive Effects, Multiple Dose Effects                                  |
| A14274 | Acute Toxicity, Multiple Dose Effects                                                                 |
| A14275 | Non-toxicity                                                                                          |
| A14276 | Non-toxicity                                                                                          |
| A14277 | Acute Toxicity, Tumorigenicity                                                                        |
| A14278 | Acute Toxicity, Mutagenicity, Reproductive Effects, Multiple Dose Effects                             |
| A14279 | Mutagenicity                                                                                          |
| A14280 | Multiple Dose Effects                                                                                 |
| A14281 | Acute Toxicity, Mutagenicity, Tumorigenicity, Skin and Eye Irritation,                                |
| A14282 | Acute Toxicity                                                                                        |
| A14283 | Acute Toxicity, Tumorigenicity                                                                        |
| A14284 | Acute Toxicity                                                                                        |
| A14285 | Multiple Dose Effects                                                                                 |
| A14286 | Reproductive Effects, Multiple Dose Effects                                                           |
| A14287 | Acute Toxicity                                                                                        |
| A14288 | Multiple Dose Effects                                                                                 |
| A14289 | Acute Toxicity, Mutagenicity, Multiple Dose Effects                                                   |
| A14290 | Acute Toxicity, Multiple Dose Effects                                                                 |
| A14291 | Mutagenicity                                                                                          |
| A14292 | Non-toxicity                                                                                          |
| A14293 | Acute Toxicity                                                                                        |
| A14294 | Mutagenicity                                                                                          |
| A14295 | Acute Toxicity, Mutagenicity                                                                          |
| A14296 | Multiple Dose Effects                                                                                 |
| A14297 | Acute Toxicity                                                                                        |
| A14298 | Multiple Dose Effects                                                                                 |
| A14299 | Acute Toxicity, Mutagenicity, Tumorigenicity, Skin and Eye Irritation,<br>Multiple Dose Effects       |
| A14300 | Mutagenicity, Reproductive Effects                                                                    |
| A14301 | Mutagenicity                                                                                          |
| A14302 | Mutagenicity                                                                                          |

|        |                                                                     |
|--------|---------------------------------------------------------------------|
| A14303 | Skin and Eye Irritation                                             |
| A14304 | Reproductive Effects, Multiple Dose Effects                         |
| A14305 | Reproductive Effects                                                |
| A14306 | Mutagenicity                                                        |
| A14307 | Mutagenicity                                                        |
| A14308 | Mutagenicity                                                        |
| A14309 | Mutagenicity                                                        |
| A14310 | Acute Toxicity, Mutagenicity, Reproductive Effects                  |
| A14311 | Acute Toxicity, Skin and Eye Irritation, Multiple Dose Effects      |
| A14312 | Acute Toxicity                                                      |
| A14313 | Acute Toxicity, Mutagenicity, Multiple Dose Effects                 |
| A14314 | Non-toxicity                                                        |
| A14315 | Acute Toxicity, Mutagenicity                                        |
| A14316 | Acute Toxicity                                                      |
| A14317 | Acute Toxicity                                                      |
| A14318 | Acute Toxicity                                                      |
| A14319 | Mutagenicity                                                        |
| A14320 | Skin and Eye Irritation                                             |
| A14321 | Mutagenicity                                                        |
| A14322 | Mutagenicity                                                        |
| A14323 | Mutagenicity                                                        |
| A14324 | Acute Toxicity, Multiple Dose Effects                               |
| A14325 | Acute Toxicity                                                      |
| A14326 | Acute Toxicity                                                      |
| A14327 | Non-toxicity                                                        |
| A14328 | Acute Toxicity                                                      |
| A14329 | Mutagenicity                                                        |
| A14330 | Acute Toxicity, Mutagenicity                                        |
| A14331 | Multiple Dose Effects                                               |
| A14332 | Mutagenicity, Reproductive Effects, Multiple Dose Effects           |
| A14333 | Acute Toxicity                                                      |
| A14334 | Non-toxicity                                                        |
| A14335 | Mutagenicity                                                        |
| A14336 | Mutagenicity                                                        |
| A14337 | Acute Toxicity, Mutagenicity, Multiple Dose Effects                 |
| A14338 | Acute Toxicity, Mutagenicity, Tumorigenicity, Multiple Dose Effects |
| A14339 | Mutagenicity                                                        |
| A14340 | Acute Toxicity                                                      |
| A14341 | Acute Toxicity                                                      |
| A14342 | Mutagenicity                                                        |
| A14343 | Acute Toxicity                                                      |
| A14344 | Acute Toxicity, Mutagenicity, Tumorigenicity, Reproductive Effects, |
| A14345 | Acute Toxicity                                                      |
| A14346 | Acute Toxicity                                                      |
| A14347 | Multiple Dose Effects                                               |
| A14348 | Acute Toxicity                                                      |

|        |                                                                                                    |
|--------|----------------------------------------------------------------------------------------------------|
| A14349 | Mutagenicity                                                                                       |
| A14350 | Acute Toxicity                                                                                     |
| A14351 | Acute Toxicity                                                                                     |
| A14352 | Acute Toxicity, Reproductive Effects, Multiple Dose Effects                                        |
| A14353 | Tumorigenicity                                                                                     |
| A14354 | Mutagenicity                                                                                       |
| A14355 | Acute Toxicity                                                                                     |
| A14356 | Acute Toxicity, Mutagenicity, Skin and Eye Irritation, Reproductive Effects, Multiple Dose Effects |
| A14357 | Acute Toxicity, Mutagenicity                                                                       |
| A14358 | Acute Toxicity, Skin and Eye Irritation, Reproductive Effects, Multiple Dose                       |
| A14359 | Acute Toxicity                                                                                     |
| A14360 | Acute Toxicity                                                                                     |
| A14361 | Acute Toxicity                                                                                     |
| A14362 | Acute Toxicity, Mutagenicity, Tumorigenicity, Reproductive Effects,                                |
| A14363 | Acute Toxicity                                                                                     |
| A14364 | Acute Toxicity, Mutagenicity, Skin and Eye Irritation                                              |
| A14365 | Acute Toxicity                                                                                     |
| A14366 | Acute Toxicity, Mutagenicity, Tumorigenicity, Skin and Eye Irritation,                             |
| A14367 | Acute Toxicity                                                                                     |
| A14368 | Acute Toxicity                                                                                     |
| A14369 | Acute Toxicity, Tumorigenicity                                                                     |
| A14370 | Non-toxicity                                                                                       |
| A14371 | Acute Toxicity, Skin and Eye Irritation, Reproductive Effects, Multiple Dose                       |
| A14372 | Acute Toxicity, Mutagenicity, Tumorigenicity, Skin and Eye Irritation,                             |
| A14373 | Acute Toxicity, Mutagenicity, Tumorigenicity, Multiple Dose Effects                                |
| A14374 | Acute Toxicity, Mutagenicity, Tumorigenicity, Skin and Eye Irritation,                             |
| A14375 | Acute Toxicity, Skin and Eye Irritation, Multiple Dose Effects                                     |
| A14376 | Acute Toxicity, Multiple Dose Effects                                                              |
| A14377 | Acute Toxicity, Mutagenicity, Skin and Eye Irritation                                              |
| A14378 | Acute Toxicity, Mutagenicity, Tumorigenicity, Multiple Dose Effects                                |
| A14379 | Non-toxicity                                                                                       |
| A14380 | Acute Toxicity, Skin and Eye Irritation, Multiple Dose Effects                                     |
| A14381 | Acute Toxicity, Mutagenicity, Tumorigenicity, Skin and Eye Irritation, Multiple Dose Effects       |
| A14382 | Acute Toxicity, Mutagenicity                                                                       |
| A14383 | Acute Toxicity                                                                                     |
| A14384 | Acute Toxicity, Mutagenicity, Multiple Dose Effects                                                |
| A14385 | Acute Toxicity                                                                                     |
| A14386 | Acute Toxicity, Multiple Dose Effects                                                              |
| A14387 | Acute Toxicity, Mutagenicity                                                                       |
| A14388 | Mutagenicity                                                                                       |
| A14389 | Acute Toxicity, Mutagenicity                                                                       |
| A14390 | Acute Toxicity, Mutagenicity                                                                       |
| A14391 | Acute Toxicity, Mutagenicity, Tumorigenicity, Skin and Eye Irritation,                             |
| A14392 | Acute Toxicity, Mutagenicity, Tumorigenicity, Reproductive Effects,                                |



|        |                                                                                                    |
|--------|----------------------------------------------------------------------------------------------------|
| A14393 | Mutagenicity                                                                                       |
| A14394 | Acute Toxicity, Mutagenicity, Tumorigenicity, Reproductive Effects,                                |
| A14395 | Acute Toxicity, Mutagenicity, Tumorigenicity, Skin and Eye Irritation,                             |
| A14396 | Mutagenicity                                                                                       |
| A14397 | Acute Toxicity, Tumorigenicity, Skin and Eye Irritation, Multiple Dose                             |
| A14398 | Acute Toxicity, Skin and Eye Irritation, Reproductive Effects, Multiple Dose                       |
| A14399 | Acute Toxicity, Mutagenicity, Reproductive Effects, Multiple Dose Effects                          |
| A14400 | Acute Toxicity                                                                                     |
| A14401 | Acute Toxicity, Mutagenicity                                                                       |
| A14402 | Acute Toxicity                                                                                     |
| A14403 | Acute Toxicity, Skin and Eye Irritation                                                            |
| A14404 | Acute Toxicity, Mutagenicity, Skin and Eye Irritation, Multiple Dose Effects                       |
| A14405 | Acute Toxicity, Mutagenicity, Skin and Eye Irritation, Reproductive Effects, Multiple Dose Effects |
| A14406 | Acute Toxicity, Tumorigenicity                                                                     |
| A14407 | Acute Toxicity, Multiple Dose Effects                                                              |
| A14408 | Acute Toxicity, Mutagenicity, Tumorigenicity, Multiple Dose Effects                                |
| A14409 | Acute Toxicity                                                                                     |
| A14410 | Acute Toxicity, Skin and Eye Irritation                                                            |
| A14411 | Acute Toxicity, Mutagenicity, Tumorigenicity                                                       |
| A14412 | Mutagenicity, Multiple Dose Effects                                                                |
| A14413 | Multiple Dose Effects                                                                              |
| A14414 | Acute Toxicity, Mutagenicity, Tumorigenicity                                                       |
| A14415 | Acute Toxicity, Skin and Eye Irritation                                                            |
| A14416 | Acute Toxicity, Skin and Eye Irritation                                                            |
| A14417 | Skin and Eye Irritation                                                                            |
| A14418 | Acute Toxicity, Mutagenicity, Skin and Eye Irritation                                              |
| A14419 | Acute Toxicity, Skin and Eye Irritation                                                            |
| A14420 | Non-toxicity                                                                                       |
| A14421 | Mutagenicity                                                                                       |
| A14422 | Mutagenicity, Skin and Eye Irritation                                                              |
| A14423 | Acute Toxicity, Mutagenicity, Tumorigenicity, Reproductive Effects,                                |
| A14424 | Acute Toxicity, Skin and Eye Irritation                                                            |
| A14425 | Acute Toxicity                                                                                     |
| A14426 | Acute Toxicity                                                                                     |
| A14427 | Skin and Eye Irritation                                                                            |
| A14428 | Acute Toxicity                                                                                     |
| A14429 | Acute Toxicity, Mutagenicity                                                                       |
| A14430 | Acute Toxicity, Mutagenicity, Tumorigenicity, Skin and Eye Irritation                              |
| A14431 | Tumorigenicity, Skin and Eye Irritation                                                            |
| A14432 | Acute Toxicity, Mutagenicity, Skin and Eye Irritation                                              |
| A14433 | Non-toxicity                                                                                       |
| A14434 | Acute Toxicity, Multiple Dose Effects                                                              |
| A14435 | Mutagenicity                                                                                       |
| A14436 | Acute Toxicity                                                                                     |
| A14437 | Acute Toxicity, Mutagenicity                                                                       |

|        |                                                                           |
|--------|---------------------------------------------------------------------------|
| A14438 | Acute Toxicity                                                            |
| A14439 | Acute Toxicity, Skin and Eye Irritation                                   |
| A14440 | Acute Toxicity, Mutagenicity                                              |
| A14441 | Acute Toxicity, Multiple Dose Effects                                     |
| A14442 | Acute Toxicity                                                            |
| A14443 | Acute Toxicity                                                            |
| A14444 | Acute Toxicity, Mutagenicity                                              |
| A14445 | Acute Toxicity, Mutagenicity, Reproductive Effects                        |
| A14446 | Acute Toxicity, Multiple Dose Effects                                     |
| A14447 | Acute Toxicity, Multiple Dose Effects                                     |
| A14448 | Acute Toxicity, Mutagenicity, Reproductive Effects, Multiple Dose Effects |
| A14449 | Acute Toxicity                                                            |
| A14450 | Reproductive Effects                                                      |
| A14451 | Acute Toxicity                                                            |
| A14452 | Acute Toxicity, Mutagenicity, Tumorigenicity                              |
| A14453 | Reproductive Effects                                                      |
| A14454 | Acute Toxicity                                                            |
| A14455 | Multiple Dose Effects                                                     |
| A14456 | Non-toxicity                                                              |
| A14457 | Acute Toxicity                                                            |
| A14458 | Acute Toxicity                                                            |
| A14459 | Acute Toxicity, Mutagenicity                                              |
| A14460 | Multiple Dose Effects                                                     |
| A14461 | Acute Toxicity, Reproductive Effects, Multiple Dose Effects               |
| A14462 | Acute Toxicity                                                            |
| A14463 | Acute Toxicity, Mutagenicity                                              |
| A14464 | Acute Toxicity, Mutagenicity, Tumorigenicity, Reproductive Effects,       |
| A14465 | Non-toxicity                                                              |
| A14466 | Acute Toxicity                                                            |
| A14467 | Acute Toxicity                                                            |
| A14468 | Acute Toxicity                                                            |
| A14469 | Skin and Eye Irritation, Reproductive Effects                             |
| A14470 | Acute Toxicity, Reproductive Effects                                      |
| A14471 | Mutagenicity                                                              |
| A14472 | Non-toxicity                                                              |
| A14473 | Mutagenicity, Tumorigenicity, Reproductive Effects                        |
| A14474 | Acute Toxicity, Mutagenicity, Multiple Dose Effects                       |
| A14475 | Acute Toxicity, Mutagenicity, Tumorigenicity, Reproductive Effects,       |
| A14476 | Acute Toxicity                                                            |
| A14477 | Acute Toxicity, Multiple Dose Effects                                     |
| A14478 | Non-toxicity                                                              |
| A14479 | Acute Toxicity, Mutagenicity, Reproductive Effects, Multiple Dose Effects |
| A14480 | Mutagenicity                                                              |
| A14481 | Mutagenicity, Tumorigenicity, Reproductive Effects, Multiple Dose Effects |
| A14482 | Acute Toxicity, Skin and Eye Irritation, Multiple Dose Effects            |
| A14483 | Acute Toxicity                                                            |

|        |                                                                                                       |
|--------|-------------------------------------------------------------------------------------------------------|
| A14484 | Non-toxicity                                                                                          |
| A14485 | Acute Toxicity, Mutagenicity, Tumorigenicity, Reproductive Effects,                                   |
| A14486 | Acute Toxicity                                                                                        |
| A14487 | Acute Toxicity                                                                                        |
| A14488 | Acute Toxicity                                                                                        |
| A14489 | Acute Toxicity, Skin and Eye Irritation, Multiple Dose Effects                                        |
| A14490 | Acute Toxicity, Multiple Dose Effects                                                                 |
| A14491 | Acute Toxicity                                                                                        |
| A14492 | Acute Toxicity                                                                                        |
| A14493 | Mutagenicity                                                                                          |
| A14494 | Non-toxicity                                                                                          |
| A14495 | Acute Toxicity                                                                                        |
| A14496 | Acute Toxicity, Mutagenicity, Tumorigenicity, Reproductive Effects                                    |
| A14497 | Acute Toxicity                                                                                        |
| A14498 | Acute Toxicity, Mutagenicity, Tumorigenicity                                                          |
| A14499 | Acute Toxicity                                                                                        |
| A14500 | Acute Toxicity, Mutagenicity                                                                          |
| A14501 | Acute Toxicity                                                                                        |
| A14502 | Acute Toxicity, Skin and Eye Irritation                                                               |
| A14503 | Acute Toxicity                                                                                        |
| A14504 | Reproductive Effects                                                                                  |
| A14505 | Acute Toxicity, Multiple Dose Effects                                                                 |
| A14506 | Non-toxicity                                                                                          |
| A14507 | Acute Toxicity                                                                                        |
| A14508 | Acute Toxicity                                                                                        |
| A14509 | Acute Toxicity, Mutagenicity                                                                          |
| A14510 | Acute Toxicity                                                                                        |
| A14511 | Acute Toxicity, Mutagenicity, Tumorigenicity, Reproductive Effects,                                   |
| A14512 | Acute Toxicity                                                                                        |
| A14513 | Acute Toxicity                                                                                        |
| A14514 | Acute Toxicity                                                                                        |
| A14515 | Acute Toxicity, Mutagenicity                                                                          |
| A14516 | Acute Toxicity                                                                                        |
| A14517 | Mutagenicity, Tumorigenicity                                                                          |
| A14518 | Acute Toxicity                                                                                        |
| A14519 | Acute Toxicity, Reproductive Effects, Multiple Dose Effects                                           |
| A14520 | Acute Toxicity                                                                                        |
| A14521 | Acute Toxicity, Mutagenicity, Skin and Eye Irritation, Reproductive Effects                           |
| A14522 | Acute Toxicity                                                                                        |
| A14523 | Mutagenicity                                                                                          |
| A14524 | Acute Toxicity, Mutagenicity, Skin and Eye Irritation, Reproductive Effects,<br>Multiple Dose Effects |
| A14525 | Acute Toxicity                                                                                        |
| A14526 | Non-toxicity                                                                                          |
| A14527 | Mutagenicity                                                                                          |
| A14528 | Acute Toxicity, Mutagenicity                                                                          |

|        |                                                                                                    |
|--------|----------------------------------------------------------------------------------------------------|
| A14529 | Mutagenicity                                                                                       |
| A14530 | Acute Toxicity                                                                                     |
| A14531 | Acute Toxicity, Mutagenicity                                                                       |
| A14532 | Multiple Dose Effects                                                                              |
| A14533 | Mutagenicity, Tumorigenicity                                                                       |
| A14534 | Mutagenicity                                                                                       |
| A14535 | Acute Toxicity                                                                                     |
| A14536 | Acute Toxicity                                                                                     |
| A14537 | Acute Toxicity, Mutagenicity                                                                       |
| A14538 | Acute Toxicity                                                                                     |
| A14539 | Acute Toxicity                                                                                     |
| A14540 | Acute Toxicity, Mutagenicity, Tumorigenicity                                                       |
| A14541 | Acute Toxicity                                                                                     |
| A14542 | Acute Toxicity                                                                                     |
| A14543 | Acute Toxicity                                                                                     |
| A14544 | Acute Toxicity, Mutagenicity                                                                       |
| A14545 | Mutagenicity                                                                                       |
| A14546 | Multiple Dose Effects                                                                              |
| A14547 | Acute Toxicity                                                                                     |
| A14548 | Mutagenicity, Tumorigenicity                                                                       |
| A14549 | Acute Toxicity, Multiple Dose Effects                                                              |
| A14550 | Acute Toxicity                                                                                     |
| A14551 | Acute Toxicity                                                                                     |
| A14552 | Acute Toxicity                                                                                     |
| A14553 | Non-toxicity                                                                                       |
| A14554 | Acute Toxicity, Mutagenicity, Skin and Eye Irritation, Reproductive Effects, Multiple Dose Effects |
| A14555 | Acute Toxicity                                                                                     |
| A14556 | Acute Toxicity                                                                                     |
| A14557 | Acute Toxicity, Mutagenicity                                                                       |
| A14558 | Acute Toxicity                                                                                     |
| A14559 | Acute Toxicity, Multiple Dose Effects                                                              |
| A14560 | Acute Toxicity, Mutagenicity                                                                       |
| A14561 | Acute Toxicity                                                                                     |
| A14562 | Tumorigenicity                                                                                     |
| A14563 | Acute Toxicity                                                                                     |
| A14564 | Acute Toxicity                                                                                     |
| A14565 | Acute Toxicity                                                                                     |
| A14566 | Acute Toxicity, Multiple Dose Effects                                                              |
| A14567 | Acute Toxicity                                                                                     |
| A14568 | Acute Toxicity, Skin and Eye Irritation, Reproductive Effects, Multiple Dose                       |
| A14569 | Acute Toxicity, Multiple Dose Effects                                                              |
| A14570 | Acute Toxicity, Mutagenicity, Tumorigenicity, Skin and Eye Irritation,                             |
| A14571 | Acute Toxicity                                                                                     |
| A14572 | Acute Toxicity                                                                                     |
| A14573 | Acute Toxicity                                                                                     |

|        |                                                                                                 |
|--------|-------------------------------------------------------------------------------------------------|
| A14574 | Acute Toxicity                                                                                  |
| A14575 | Acute Toxicity                                                                                  |
| A14576 | Acute Toxicity                                                                                  |
| A14577 | Non-toxicity                                                                                    |
| A14578 | Acute Toxicity                                                                                  |
| A14579 | Acute Toxicity, Mutagenicity, Skin and Eye Irritation                                           |
| A14580 | Acute Toxicity                                                                                  |
| A14581 | Non-toxicity                                                                                    |
| A14582 | Acute Toxicity, Multiple Dose Effects                                                           |
| A14583 | Acute Toxicity                                                                                  |
| A14584 | Acute Toxicity                                                                                  |
| A14585 | Acute Toxicity, Mutagenicity, Tumorigenicity, Reproductive Effects,                             |
| A14586 | Mutagenicity, Tumorigenicity                                                                    |
| A14587 | Acute Toxicity                                                                                  |
| A14588 | Acute Toxicity                                                                                  |
| A14589 | Acute Toxicity, Mutagenicity, Tumorigenicity, Reproductive Effects,                             |
| A14590 | Mutagenicity                                                                                    |
| A14591 | Acute Toxicity, Multiple Dose Effects                                                           |
| A14592 | Acute Toxicity                                                                                  |
| A14593 | Acute Toxicity                                                                                  |
| A14594 | Acute Toxicity, Reproductive Effects, Multiple Dose Effects                                     |
| A14595 | Acute Toxicity                                                                                  |
| A14596 | Acute Toxicity, Mutagenicity, Tumorigenicity, Skin and Eye Irritation,<br>Multiple Dose Effects |
| A14597 | Acute Toxicity, Mutagenicity                                                                    |
| A14598 | Acute Toxicity, Skin and Eye Irritation                                                         |
| A14599 | Acute Toxicity, Mutagenicity, Tumorigenicity, Skin and Eye Irritation,<br>Multiple Dose Effects |
| A14600 | Acute Toxicity, Skin and Eye Irritation, Multiple Dose Effects                                  |
| A14601 | Acute Toxicity                                                                                  |
| A14602 | Acute Toxicity                                                                                  |
| A14603 | Acute Toxicity                                                                                  |
| A14604 | Non-toxicity                                                                                    |
| A14605 | Acute Toxicity, Mutagenicity                                                                    |
| A14606 | Acute Toxicity                                                                                  |
| A14607 | Acute Toxicity                                                                                  |
| A14608 | Acute Toxicity, Skin and Eye Irritation                                                         |
| A14609 | Acute Toxicity                                                                                  |
| A14610 | Acute Toxicity                                                                                  |
| A14611 | Acute Toxicity, Tumorigenicity, Multiple Dose Effects                                           |
| A14612 | Tumorigenicity                                                                                  |
| A14613 | Acute Toxicity, Skin and Eye Irritation                                                         |
| A14614 | Acute Toxicity                                                                                  |
| A14615 | Acute Toxicity, Skin and Eye Irritation, Multiple Dose Effects                                  |
| A14616 | Acute Toxicity, Mutagenicity, Skin and Eye Irritation                                           |
| A14617 | Acute Toxicity                                                                                  |

|        |                                                                           |
|--------|---------------------------------------------------------------------------|
| A14618 | Acute Toxicity                                                            |
| A14619 | Acute Toxicity                                                            |
| A14620 | Acute Toxicity                                                            |
| A14621 | Acute Toxicity, Skin and Eye Irritation, Multiple Dose Effects            |
| A14622 | Non-toxicity                                                              |
| A14623 | Acute Toxicity                                                            |
| A14624 | Skin and Eye Irritation                                                   |
| A14625 | Non-toxicity                                                              |
| A14626 | Acute Toxicity, Reproductive Effects                                      |
| A14627 | Non-toxicity                                                              |
| A14628 | Acute Toxicity, Mutagenicity, Multiple Dose Effects                       |
| A14629 | Acute Toxicity                                                            |
| A14630 | Acute Toxicity                                                            |
| A14631 | Acute Toxicity                                                            |
| A14632 | Acute Toxicity                                                            |
| A14633 | Non-toxicity                                                              |
| A14634 | Acute Toxicity, Skin and Eye Irritation, Reproductive Effects             |
| A14635 | Acute Toxicity                                                            |
| A14636 | Acute Toxicity, Reproductive Effects, Multiple Dose Effects               |
| A14637 | Acute Toxicity, Mutagenicity, Tumorigenicity, Skin and Eye Irritation,    |
| A14638 | Acute Toxicity                                                            |
| A14639 | Acute Toxicity, Reproductive Effects                                      |
| A14640 | Acute Toxicity, Mutagenicity                                              |
| A14641 | Acute Toxicity                                                            |
| A14642 | Acute Toxicity, Mutagenicity, Tumorigenicity                              |
| A14643 | Acute Toxicity, Mutagenicity, Tumorigenicity, Skin and Eye Irritation,    |
| A14644 | Acute Toxicity, Mutagenicity                                              |
| A14645 | Acute Toxicity                                                            |
| A14646 | Acute Toxicity                                                            |
| A14647 | Mutagenicity                                                              |
| A14648 | Acute Toxicity, Mutagenicity, Tumorigenicity, Reproductive Effects,       |
| A14649 | Mutagenicity                                                              |
| A14650 | Acute Toxicity, Mutagenicity, Skin and Eye Irritation                     |
| A14651 | Mutagenicity                                                              |
| A14652 | Acute Toxicity, Mutagenicity, Skin and Eye Irritation                     |
| A14653 | Acute Toxicity, Reproductive Effects, Multiple Dose Effects               |
| A14654 | Acute Toxicity, Mutagenicity, Tumorigenicity                              |
| A14655 | Acute Toxicity, Mutagenicity, Reproductive Effects, Multiple Dose Effects |
| A14656 | Acute Toxicity, Mutagenicity, Tumorigenicity                              |
| A14657 | Tumorigenicity                                                            |
| A14658 | Acute Toxicity                                                            |
| A14659 | Acute Toxicity, Multiple Dose Effects                                     |
| A14660 | Acute Toxicity                                                            |
| A14661 | Acute Toxicity, Mutagenicity, Tumorigenicity, Reproductive Effects,       |
| A14662 | Acute Toxicity, Mutagenicity                                              |
| A14663 | Reproductive Effects                                                      |

|        |                                                                                              |
|--------|----------------------------------------------------------------------------------------------|
| A14664 | Reproductive Effects, Multiple Dose Effects                                                  |
| A14665 | Acute Toxicity, Mutagenicity, Multiple Dose Effects                                          |
| A14666 | Acute Toxicity, Mutagenicity, Tumorigenicity, Skin and Eye Irritation, Multiple Dose Effects |
| A14667 | Acute Toxicity                                                                               |
| A14668 | Mutagenicity                                                                                 |
| A14669 | Acute Toxicity                                                                               |
| A14670 | Acute Toxicity                                                                               |
| A14671 | Acute Toxicity                                                                               |
| A14672 | Acute Toxicity, Multiple Dose Effects                                                        |
| A14673 | Acute Toxicity                                                                               |
| A14674 | Acute Toxicity, Mutagenicity, Tumorigenicity, Reproductive Effects,                          |
| A14675 | Mutagenicity                                                                                 |
| A14676 | Mutagenicity                                                                                 |
| A14677 | Mutagenicity                                                                                 |
| A14678 | Mutagenicity                                                                                 |
| A14679 | Acute Toxicity                                                                               |
| A14680 | Acute Toxicity                                                                               |
| A14681 | Acute Toxicity                                                                               |
| A14682 | Acute Toxicity                                                                               |
| A14683 | Acute Toxicity, Tumorigenicity                                                               |
| A14684 | Acute Toxicity                                                                               |
| A14685 | Acute Toxicity, Mutagenicity, Tumorigenicity, Multiple Dose Effects                          |
| A14686 | Non-toxicity                                                                                 |
| A14687 | Acute Toxicity, Mutagenicity                                                                 |
| A14688 | Acute Toxicity                                                                               |
| A14689 | Acute Toxicity, Mutagenicity, Tumorigenicity, Multiple Dose Effects                          |
| A14690 | Tumorigenicity                                                                               |
| A14691 | Acute Toxicity, Multiple Dose Effects                                                        |
| A14692 | Mutagenicity                                                                                 |
| A14693 | Acute Toxicity, Mutagenicity, Reproductive Effects, Multiple Dose Effects                    |
| A14694 | Acute Toxicity, Mutagenicity, Reproductive Effects, Multiple Dose Effects                    |
| A14695 | Mutagenicity                                                                                 |
| A14696 | Acute Toxicity, Reproductive Effects, Multiple Dose Effects                                  |
| A14697 | Acute Toxicity                                                                               |
| A14698 | Acute Toxicity                                                                               |
| A14699 | Acute Toxicity, Mutagenicity, Reproductive Effects                                           |
| A14700 | Acute Toxicity                                                                               |
| A14701 | Acute Toxicity, Skin and Eye Irritation, Multiple Dose Effects                               |
| A14702 | Acute Toxicity                                                                               |
| A14703 | Acute Toxicity                                                                               |
| A14704 | Acute Toxicity                                                                               |
| A14705 | Acute Toxicity                                                                               |
| A14706 | Multiple Dose Effects                                                                        |
| A14707 | Acute Toxicity, Skin and Eye Irritation, Reproductive Effects, Multiple Dose                 |
| A14708 | Non-toxicity                                                                                 |

|        |                                                                           |
|--------|---------------------------------------------------------------------------|
| A14709 | Acute Toxicity, Mutagenicity, Reproductive Effects, Multiple Dose Effects |
| A14710 | Mutagenicity, Reproductive Effects, Multiple Dose Effects                 |
| A14711 | Acute Toxicity, Mutagenicity, Tumorigenicity, Multiple Dose Effects       |
| A14712 | Mutagenicity                                                              |
| A14713 | Mutagenicity                                                              |
| A14714 | Mutagenicity                                                              |
| A14715 | Mutagenicity                                                              |
| A14716 | Acute Toxicity                                                            |
| A14717 | Multiple Dose Effects                                                     |
| A14718 | Non-toxicity                                                              |
| A14719 | Multiple Dose Effects                                                     |
| A14720 | Acute Toxicity, Multiple Dose Effects                                     |
| A14721 | Multiple Dose Effects                                                     |
| A14722 | Mutagenicity                                                              |
| A14723 | Acute Toxicity                                                            |
| A14724 | Mutagenicity                                                              |
| A14725 | Acute Toxicity                                                            |
| A14726 | Mutagenicity                                                              |
| A14727 | Skin and Eye Irritation                                                   |
| A14728 | Acute Toxicity                                                            |
| A14729 | Acute Toxicity                                                            |
| A14730 | Acute Toxicity                                                            |
| A14731 | Acute Toxicity                                                            |
| A14732 | Acute Toxicity                                                            |
| A14733 | Mutagenicity                                                              |
| A14734 | Tumorigenicity                                                            |
| A14735 | Multiple Dose Effects                                                     |
| A14736 | Tumorigenicity                                                            |
| A14737 | Acute Toxicity                                                            |
| A14738 | Acute Toxicity, Multiple Dose Effects                                     |
| A14739 | Mutagenicity                                                              |
| A14740 | Mutagenicity                                                              |
| A14741 | Acute Toxicity                                                            |
| A14742 | Acute Toxicity                                                            |
| A14743 | Acute Toxicity                                                            |
| A14744 | Acute Toxicity, Multiple Dose Effects                                     |
| A14745 | Acute Toxicity                                                            |
| A14746 | Mutagenicity, Tumorigenicity                                              |
| A14747 | Acute Toxicity                                                            |
| A14748 | Acute Toxicity                                                            |
| A14749 | Acute Toxicity                                                            |
| A14750 | Acute Toxicity                                                            |
| A14751 | Acute Toxicity                                                            |
| A14752 | Acute Toxicity                                                            |
| A14753 | Acute Toxicity                                                            |
| A14754 | Acute Toxicity                                                            |



|        |                                                                           |
|--------|---------------------------------------------------------------------------|
| A14755 | Acute Toxicity                                                            |
| A14756 | Acute Toxicity                                                            |
| A14757 | Acute Toxicity                                                            |
| A14758 | Acute Toxicity                                                            |
| A14759 | Acute Toxicity                                                            |
| A14760 | Acute Toxicity                                                            |
| A14761 | Acute Toxicity                                                            |
| A14762 | Acute Toxicity                                                            |
| A14763 | Acute Toxicity                                                            |
| A14764 | Acute Toxicity                                                            |
| A14765 | Acute Toxicity                                                            |
| A14766 | Acute Toxicity                                                            |
| A14767 | Tumorigenicity                                                            |
| A14768 | Acute Toxicity                                                            |
| A14769 | Acute Toxicity                                                            |
| A14770 | Acute Toxicity                                                            |
| A14771 | Acute Toxicity                                                            |
| A14772 | Acute Toxicity                                                            |
| A14773 | Acute Toxicity                                                            |
| A14774 | Acute Toxicity                                                            |
| A14775 | Acute Toxicity                                                            |
| A14776 | Acute Toxicity, Skin and Eye Irritation, Multiple Dose Effects            |
| A14777 | Acute Toxicity, Multiple Dose Effects                                     |
| A14778 | Non-toxicity                                                              |
| A14779 | Acute Toxicity                                                            |
| A14780 | Acute Toxicity                                                            |
| A14781 | Acute Toxicity, Reproductive Effects, Multiple Dose Effects               |
| A14782 | Acute Toxicity, Reproductive Effects                                      |
| A14783 | Acute Toxicity, Mutagenicity, Reproductive Effects                        |
| A14784 | Acute Toxicity                                                            |
| A14785 | Acute Toxicity, Mutagenicity, Reproductive Effects                        |
| A14786 | Mutagenicity                                                              |
| A14787 | Acute Toxicity, Multiple Dose Effects                                     |
| A14788 | Mutagenicity, Tumorigenicity, Multiple Dose Effects                       |
| A14789 | Mutagenicity                                                              |
| A14790 | Acute Toxicity                                                            |
| A14791 | Acute Toxicity                                                            |
| A14792 | Reproductive Effects                                                      |
| A14793 | Acute Toxicity, Mutagenicity, Tumorigenicity, Reproductive Effects        |
| A14794 | Acute Toxicity, Multiple Dose Effects                                     |
| A14795 | Acute Toxicity                                                            |
| A14796 | Acute Toxicity                                                            |
| A14797 | Acute Toxicity                                                            |
| A14798 | Tumorigenicity                                                            |
| A14799 | Acute Toxicity, Mutagenicity, Reproductive Effects, Multiple Dose Effects |
| A14800 | Acute Toxicity, Reproductive Effects                                      |

|        |                                                                           |
|--------|---------------------------------------------------------------------------|
| A14801 | Acute Toxicity                                                            |
| A14802 | Reproductive Effects                                                      |
| A14803 | Acute Toxicity, Mutagenicity, Reproductive Effects, Multiple Dose Effects |
| A14804 | Acute Toxicity, Mutagenicity, Reproductive Effects, Multiple Dose Effects |
| A14805 | Acute Toxicity                                                            |
| A14806 | Skin and Eye Irritation                                                   |
| A14807 | Acute Toxicity, Mutagenicity, Reproductive Effects                        |
| A14808 | Acute Toxicity                                                            |
| A14809 | Acute Toxicity                                                            |
| A14810 | Mutagenicity                                                              |
| A14811 | Acute Toxicity, Skin and Eye Irritation                                   |
| A14812 | Mutagenicity                                                              |
| A14813 | Acute Toxicity, Reproductive Effects, Multiple Dose Effects               |
| A14814 | Acute Toxicity                                                            |
| A14815 | Acute Toxicity                                                            |
| A14816 | Acute Toxicity                                                            |
| A14817 | Acute Toxicity                                                            |
| A14818 | Acute Toxicity                                                            |
| A14819 | Acute Toxicity, Reproductive Effects, Multiple Dose Effects               |
| A14820 | Acute Toxicity                                                            |
| A14821 | Acute Toxicity                                                            |
| A14822 | Acute Toxicity                                                            |
| A14823 | Acute Toxicity                                                            |
| A14824 | Mutagenicity                                                              |
| A14825 | Acute Toxicity                                                            |
| A14826 | Acute Toxicity                                                            |
| A14827 | Acute Toxicity, Mutagenicity, Tumorigenicity, Reproductive Effects,       |
| A14828 | Acute Toxicity, Tumorigenicity, Multiple Dose Effects                     |
| A14829 | Acute Toxicity, Skin and Eye Irritation, Multiple Dose Effects            |
| A14830 | Acute Toxicity                                                            |
| A14831 | Acute Toxicity                                                            |
| A14832 | Mutagenicity                                                              |
| A14833 | Acute Toxicity                                                            |
| A14834 | Acute Toxicity, Mutagenicity                                              |
| A14835 | Reproductive Effects                                                      |
| A14836 | Acute Toxicity                                                            |
| A14837 | Acute Toxicity, Multiple Dose Effects                                     |
| A14838 | Mutagenicity, Reproductive Effects, Multiple Dose Effects                 |
| A14839 | Mutagenicity                                                              |
| A14840 | Skin and Eye Irritation                                                   |
| A14841 | Acute Toxicity                                                            |
| A14842 | Acute Toxicity                                                            |
| A14843 | Acute Toxicity, Multiple Dose Effects                                     |
| A14844 | Mutagenicity, Reproductive Effects, Multiple Dose Effects                 |
| A14845 | Acute Toxicity                                                            |
| A14846 | Acute Toxicity                                                            |

|        |                                                                              |
|--------|------------------------------------------------------------------------------|
| A14847 | Acute Toxicity, Mutagenicity                                                 |
| A14848 | Acute Toxicity                                                               |
| A14849 | Acute Toxicity                                                               |
| A14850 | Acute Toxicity                                                               |
| A14851 | Acute Toxicity                                                               |
| A14852 | Acute Toxicity                                                               |
| A14853 | Acute Toxicity                                                               |
| A14854 | Mutagenicity                                                                 |
| A14855 | Mutagenicity                                                                 |
| A14856 | Acute Toxicity, Multiple Dose Effects                                        |
| A14857 | Acute Toxicity, Skin and Eye Irritation, Reproductive Effects, Multiple Dose |
| A14858 | Acute Toxicity                                                               |
| A14859 | Acute Toxicity                                                               |
| A14860 | Acute Toxicity, Skin and Eye Irritation                                      |
| A14861 | Acute Toxicity, Reproductive Effects, Multiple Dose Effects                  |
| A14862 | Acute Toxicity, Multiple Dose Effects                                        |
| A14863 | Acute Toxicity                                                               |
| A14864 | Mutagenicity                                                                 |
| A14865 | Acute Toxicity                                                               |
| A14866 | Acute Toxicity                                                               |
| A14867 | Acute Toxicity, Multiple Dose Effects                                        |
| A14868 | Reproductive Effects                                                         |
| A14869 | Acute Toxicity                                                               |
| A14870 | Acute Toxicity                                                               |
| A14871 | Acute Toxicity                                                               |
| A14872 | Acute Toxicity                                                               |
| A14873 | Mutagenicity                                                                 |
| A14874 | Acute Toxicity                                                               |
| A14875 | Mutagenicity, Skin and Eye Irritation                                        |
| A14876 | Mutagenicity, Tumorigenicity                                                 |
| A14877 | Acute Toxicity, Mutagenicity, Multiple Dose Effects                          |
| A14878 | Acute Toxicity, Multiple Dose Effects                                        |
| A14879 | Skin and Eye Irritation                                                      |
| A14880 | Skin and Eye Irritation                                                      |
| A14881 | Acute Toxicity, Skin and Eye Irritation, Multiple Dose Effects               |
| A14882 | Acute Toxicity                                                               |
| A14883 | Mutagenicity                                                                 |
| A14884 | Mutagenicity, Tumorigenicity                                                 |
| A14885 | Mutagenicity                                                                 |
| A14886 | Mutagenicity                                                                 |
| A14887 | Mutagenicity                                                                 |
| A14888 | Acute Toxicity, Mutagenicity                                                 |
| A14889 | Acute Toxicity                                                               |
| A14890 | Acute Toxicity                                                               |
| A14891 | Acute Toxicity                                                               |
| A14892 | Mutagenicity                                                                 |

|        |                                                             |
|--------|-------------------------------------------------------------|
| A14893 | Tumorigenicity                                              |
| A14894 | Acute Toxicity                                              |
| A14895 | Acute Toxicity, Multiple Dose Effects                       |
| A14896 | Acute Toxicity                                              |
| A14897 | Acute Toxicity                                              |
| A14898 | Acute Toxicity                                              |
| A14899 | Acute Toxicity                                              |
| A14900 | Acute Toxicity                                              |
| A14901 | Mutagenicity, Tumorigenicity                                |
| A14902 | Acute Toxicity                                              |
| A14903 | Acute Toxicity, Multiple Dose Effects                       |
| A14904 | Acute Toxicity                                              |
| A14905 | Acute Toxicity                                              |
| A14906 | Acute Toxicity                                              |
| A14907 | Acute Toxicity, Mutagenicity                                |
| A14908 | Acute Toxicity                                              |
| A14909 | Acute Toxicity, Mutagenicity                                |
| A14910 | Mutagenicity                                                |
| A14911 | Acute Toxicity                                              |
| A14912 | Acute Toxicity                                              |
| A14913 | Mutagenicity, Tumorigenicity                                |
| A14914 | Reproductive Effects                                        |
| A14915 | Acute Toxicity, Reproductive Effects                        |
| A14916 | Mutagenicity                                                |
| A14917 | Tumorigenicity                                              |
| A14918 | Mutagenicity                                                |
| A14919 | Acute Toxicity                                              |
| A14920 | Skin and Eye Irritation                                     |
| A14921 | Acute Toxicity                                              |
| A14922 | Acute Toxicity                                              |
| A14923 | Acute Toxicity, Reproductive Effects, Multiple Dose Effects |
| A14924 | Mutagenicity                                                |
| A14925 | Acute Toxicity                                              |
| A14926 | Mutagenicity                                                |
| A14927 | Acute Toxicity                                              |
| A14928 | Acute Toxicity                                              |
| A14929 | Reproductive Effects, Multiple Dose Effects                 |
| A14930 | Acute Toxicity                                              |
| A14931 | Acute Toxicity                                              |
| A14932 | Acute Toxicity                                              |
| A14933 | Reproductive Effects                                        |
| A14934 | Acute Toxicity                                              |
| A14935 | Acute Toxicity                                              |
| A14936 | Tumorigenicity                                              |
| A14937 | Multiple Dose Effects                                       |
| A14938 | Acute Toxicity                                              |

|        |                                |
|--------|--------------------------------|
| A14939 | Acute Toxicity                 |
| A14940 | Acute Toxicity                 |
| A14941 | Acute Toxicity                 |
| A14942 | Acute Toxicity                 |
| A14943 | Acute Toxicity                 |
| A14944 | Acute Toxicity                 |
| A14945 | Acute Toxicity                 |
| A14946 | Acute Toxicity                 |
| A14947 | Acute Toxicity                 |
| A14948 | Acute Toxicity                 |
| A14949 | Acute Toxicity                 |
| A14950 | Acute Toxicity                 |
| A14951 | Acute Toxicity                 |
| A14952 | Acute Toxicity, Tumorigenicity |
| A14953 | Acute Toxicity                 |
| A14954 | Acute Toxicity                 |
| A14955 | Acute Toxicity                 |
| A14956 | Acute Toxicity                 |
| A14957 | Acute Toxicity                 |
| A14958 | Acute Toxicity                 |
| A14959 | Acute Toxicity                 |
| A14960 | Acute Toxicity                 |
| A14961 | Acute Toxicity                 |
| A14962 | Acute Toxicity                 |
| A14963 | Acute Toxicity                 |
| A14964 | Acute Toxicity                 |
| A14965 | Acute Toxicity                 |
| A14966 | Acute Toxicity                 |
| A14967 | Acute Toxicity                 |
| A14968 | Acute Toxicity                 |
| A14969 | Acute Toxicity                 |
| A14970 | Acute Toxicity                 |
| A14971 | Acute Toxicity                 |
| A14972 | Acute Toxicity                 |
| A14973 | Acute Toxicity                 |
| A14974 | Acute Toxicity                 |
| A14975 | Acute Toxicity                 |
| A14976 | Acute Toxicity                 |
| A14977 | Acute Toxicity                 |
| A14978 | Acute Toxicity                 |
| A14979 | Acute Toxicity                 |
| A14980 | Acute Toxicity                 |
| A14981 | Acute Toxicity                 |
| A14982 | Acute Toxicity                 |
| A14983 | Acute Toxicity                 |
| A14984 | Acute Toxicity                 |

|        |                                       |
|--------|---------------------------------------|
| A14985 | Acute Toxicity, Mutagenicity          |
| A14986 | Acute Toxicity                        |
| A14987 | Acute Toxicity                        |
| A14988 | Acute Toxicity                        |
| A14989 | Acute Toxicity                        |
| A14990 | Acute Toxicity                        |
| A14991 | Acute Toxicity                        |
| A14992 | Acute Toxicity                        |
| A14993 | Acute Toxicity                        |
| A14994 | Mutagenicity                          |
| A14995 | Non-toxicity                          |
| A14996 | Acute Toxicity                        |
| A14997 | Acute Toxicity                        |
| A14998 | Acute Toxicity                        |
| A14999 | Acute Toxicity                        |
| A15000 | Acute Toxicity                        |
| A15001 | Acute Toxicity                        |
| A15002 | Acute Toxicity                        |
| A15003 | Acute Toxicity                        |
| A15004 | Acute Toxicity                        |
| A15005 | Acute Toxicity                        |
| A15006 | Acute Toxicity                        |
| A15007 | Acute Toxicity                        |
| A15008 | Acute Toxicity                        |
| A15009 | Acute Toxicity                        |
| A15010 | Acute Toxicity                        |
| A15011 | Acute Toxicity                        |
| A15012 | Acute Toxicity                        |
| A15013 | Acute Toxicity                        |
| A15014 | Acute Toxicity                        |
| A15015 | Acute Toxicity                        |
| A15016 | Acute Toxicity                        |
| A15017 | Acute Toxicity                        |
| A15018 | Mutagenicity, Tumorigenicity          |
| A15019 | Acute Toxicity                        |
| A15020 | Acute Toxicity                        |
| A15021 | Acute Toxicity                        |
| A15022 | Acute Toxicity                        |
| A15023 | Acute Toxicity, Multiple Dose Effects |
| A15024 | Acute Toxicity                        |
| A15025 | Acute Toxicity                        |
| A15026 | Acute Toxicity                        |
| A15027 | Acute Toxicity                        |
| A15028 | Acute Toxicity                        |
| A15029 | Acute Toxicity                        |
| A15030 | Acute Toxicity                        |

|        |                              |
|--------|------------------------------|
| A15031 | Acute Toxicity               |
| A15032 | Acute Toxicity               |
| A15033 | Acute Toxicity               |
| A15034 | Acute Toxicity               |
| A15035 | Acute Toxicity, Mutagenicity |
| A15036 | Acute Toxicity               |
| A15037 | Acute Toxicity               |
| A15038 | Acute Toxicity               |
| A15039 | Acute Toxicity               |
| A15040 | Acute Toxicity               |
| A15041 | Acute Toxicity               |
| A15042 | Acute Toxicity               |
| A15043 | Acute Toxicity               |
| A15044 | Acute Toxicity               |
| A15045 | Acute Toxicity               |
| A15046 | Acute Toxicity               |
| A15047 | Acute Toxicity               |
| A15048 | Acute Toxicity               |
| A15049 | Acute Toxicity               |
| A15050 | Acute Toxicity               |
| A15051 | Acute Toxicity               |
| A15052 | Acute Toxicity               |
| A15053 | Acute Toxicity               |
| A15054 | Acute Toxicity               |
| A15055 | Acute Toxicity               |
| A15056 | Tumorigenicity               |
| A15057 | Acute Toxicity               |
| A15058 | Acute Toxicity               |
| A15059 | Acute Toxicity               |
| A15060 | Acute Toxicity               |
| A15061 | Reproductive Effects         |
| A15062 | Acute Toxicity               |
| A15063 | Acute Toxicity               |
| A15064 | Acute Toxicity               |
| A15065 | Acute Toxicity               |
| A15066 | Acute Toxicity               |
| A15067 | Acute Toxicity               |
| A15068 | Acute Toxicity               |
| A15069 | Acute Toxicity               |
| A15070 | Acute Toxicity               |
| A15071 | Acute Toxicity               |
| A15072 | Acute Toxicity               |
| A15073 | Acute Toxicity               |
| A15074 | Acute Toxicity               |
| A15075 | Acute Toxicity               |
| A15076 | Acute Toxicity               |

|        |                                       |
|--------|---------------------------------------|
| A15077 | Acute Toxicity                        |
| A15078 | Acute Toxicity                        |
| A15079 | Acute Toxicity                        |
| A15080 | Acute Toxicity                        |
| A15081 | Acute Toxicity                        |
| A15082 | Acute Toxicity                        |
| A15083 | Acute Toxicity                        |
| A15084 | Acute Toxicity                        |
| A15085 | Acute Toxicity                        |
| A15086 | Acute Toxicity                        |
| A15087 | Acute Toxicity                        |
| A15088 | Acute Toxicity                        |
| A15089 | Acute Toxicity                        |
| A15090 | Acute Toxicity                        |
| A15091 | Acute Toxicity                        |
| A15092 | Acute Toxicity                        |
| A15093 | Acute Toxicity                        |
| A15094 | Acute Toxicity                        |
| A15095 | Acute Toxicity                        |
| A15096 | Acute Toxicity                        |
| A15097 | Acute Toxicity                        |
| A15098 | Acute Toxicity                        |
| A15099 | Acute Toxicity                        |
| A15100 | Acute Toxicity                        |
| A15101 | Acute Toxicity                        |
| A15102 | Acute Toxicity                        |
| A15103 | Acute Toxicity                        |
| A15104 | Mutagenicity                          |
| A15105 | Multiple Dose Effects                 |
| A15106 | Acute Toxicity                        |
| A15107 | Acute Toxicity                        |
| A15108 | Mutagenicity                          |
| A15109 | Acute Toxicity                        |
| A15110 | Acute Toxicity                        |
| A15111 | Acute Toxicity                        |
| A15112 | Acute Toxicity                        |
| A15113 | Acute Toxicity                        |
| A15114 | Acute Toxicity                        |
| A15115 | Acute Toxicity                        |
| A15116 | Acute Toxicity                        |
| A15117 | Acute Toxicity                        |
| A15118 | Acute Toxicity                        |
| A15119 | Acute Toxicity                        |
| A15120 | Acute Toxicity                        |
| A15121 | Acute Toxicity, Multiple Dose Effects |
| A15122 | Acute Toxicity                        |



|        |                |
|--------|----------------|
| A15123 | Acute Toxicity |
| A15124 | Mutagenicity   |
| A15125 | Acute Toxicity |
| A15126 | Acute Toxicity |
| A15127 | Acute Toxicity |
| A15128 | Acute Toxicity |
| A15129 | Acute Toxicity |
| A15130 | Acute Toxicity |
| A15131 | Acute Toxicity |
| A15132 | Acute Toxicity |
| A15133 | Acute Toxicity |
| A15134 | Acute Toxicity |
| A15135 | Acute Toxicity |
| A15136 | Acute Toxicity |
| A15137 | Acute Toxicity |
| A15138 | Acute Toxicity |
| A15139 | Acute Toxicity |
| A15140 | Acute Toxicity |
| A15141 | Acute Toxicity |
| A15142 | Acute Toxicity |
| A15143 | Acute Toxicity |
| A15144 | Acute Toxicity |
| A15145 | Acute Toxicity |
| A15146 | Acute Toxicity |
| A15147 | Acute Toxicity |
| A15148 | Acute Toxicity |
| A15149 | Acute Toxicity |
| A15150 | Acute Toxicity |
| A15151 | Acute Toxicity |
| A15152 | Acute Toxicity |
| A15153 | Acute Toxicity |
| A15154 | Acute Toxicity |
| A15155 | Acute Toxicity |
| A15156 | Acute Toxicity |
| A15157 | Acute Toxicity |
| A15158 | Acute Toxicity |
| A15159 | Acute Toxicity |
| A15160 | Acute Toxicity |
| A15161 | Acute Toxicity |
| A15162 | Acute Toxicity |
| A15163 | Acute Toxicity |
| A15164 | Acute Toxicity |
| A15165 | Acute Toxicity |
| A15166 | Acute Toxicity |
| A15167 | Acute Toxicity |
| A15168 | Acute Toxicity |

|        |                                                             |
|--------|-------------------------------------------------------------|
| A15169 | Acute Toxicity                                              |
| A15170 | Acute Toxicity                                              |
| A15171 | Acute Toxicity                                              |
| A15172 | Acute Toxicity                                              |
| A15173 | Acute Toxicity                                              |
| A15174 | Acute Toxicity                                              |
| A15175 | Multiple Dose Effects                                       |
| A15176 | Acute Toxicity                                              |
| A15177 | Acute Toxicity, Reproductive Effects, Multiple Dose Effects |
| A15178 | Mutagenicity                                                |
| A15179 | Skin and Eye Irritation                                     |
| A15180 | Acute Toxicity                                              |
| A15181 | Mutagenicity                                                |
| A15182 | Non-toxicity                                                |
| A15183 | Acute Toxicity                                              |
| A15184 | Acute Toxicity                                              |
| A15185 | Acute Toxicity                                              |
| A15186 | Acute Toxicity                                              |
| A15187 | Multiple Dose Effects                                       |
| A15188 | Acute Toxicity, Multiple Dose Effects                       |
| A15189 | Acute Toxicity, Multiple Dose Effects                       |
| A15190 | Mutagenicity, Multiple Dose Effects                         |
| A15191 | Acute Toxicity                                              |
| A15192 | Acute Toxicity, Skin and Eye Irritation                     |
| A15193 | Acute Toxicity                                              |
| A15194 | Multiple Dose Effects                                       |
| A15195 | Acute Toxicity                                              |
| A15196 | Acute Toxicity                                              |
| A15197 | Acute Toxicity                                              |
| A15198 | Acute Toxicity                                              |
| A15199 | Acute Toxicity                                              |
| A15200 | Mutagenicity                                                |
| A15201 | Mutagenicity                                                |
| A15202 | Multiple Dose Effects                                       |
| A15203 | Acute Toxicity                                              |
| A15204 | Acute Toxicity                                              |
| A15205 | Acute Toxicity                                              |
| A15206 | Acute Toxicity                                              |
| A15207 | Acute Toxicity                                              |
| A15208 | Acute Toxicity                                              |
| A15209 | Acute Toxicity                                              |
| A15210 | Acute Toxicity                                              |
| A15211 | Acute Toxicity                                              |
| A15212 | Acute Toxicity, Multiple Dose Effects                       |
| A15213 | Acute Toxicity                                              |
| A15214 | Acute Toxicity                                              |

|        |                                                                                              |
|--------|----------------------------------------------------------------------------------------------|
| A15215 | Acute Toxicity                                                                               |
| A15216 | Acute Toxicity                                                                               |
| A15217 | Multiple Dose Effects                                                                        |
| A15218 | Acute Toxicity, Multiple Dose Effects                                                        |
| A15219 | Acute Toxicity                                                                               |
| A15220 | Acute Toxicity                                                                               |
| A15221 | Acute Toxicity                                                                               |
| A15222 | Acute Toxicity, Reproductive Effects                                                         |
| A15223 | Acute Toxicity, Multiple Dose Effects                                                        |
| A15224 | Acute Toxicity                                                                               |
| A15225 | Acute Toxicity, Multiple Dose Effects                                                        |
| A15226 | Acute Toxicity, Mutagenicity, Tumorigenicity, Skin and Eye Irritation                        |
| A15227 | Acute Toxicity, Mutagenicity                                                                 |
| A15228 | Mutagenicity                                                                                 |
| A15229 | Acute Toxicity                                                                               |
| A15230 | Non-toxicity                                                                                 |
| A15231 | Acute Toxicity, Skin and Eye Irritation                                                      |
| A15232 | Acute Toxicity, Mutagenicity, Tumorigenicity, Multiple Dose Effects                          |
| A15233 | Acute Toxicity, Mutagenicity, Tumorigenicity, Skin and Eye Irritation, Multiple Dose Effects |
| A15234 | Mutagenicity                                                                                 |
| A15235 | Acute Toxicity                                                                               |
| A15236 | Acute Toxicity                                                                               |
| A15237 | Acute Toxicity, Tumorigenicity                                                               |
| A15238 | Acute Toxicity, Mutagenicity, Tumorigenicity, Skin and Eye Irritation, Multiple Dose Effects |
| A15239 | Acute Toxicity                                                                               |
| A15240 | Skin and Eye Irritation                                                                      |
| A15241 | Acute Toxicity, Mutagenicity, Skin and Eye Irritation                                        |
| A15242 | Skin and Eye Irritation                                                                      |
| A15243 | Acute Toxicity, Skin and Eye Irritation, Multiple Dose Effects                               |
| A15244 | Acute Toxicity                                                                               |
| A15245 | Multiple Dose Effects                                                                        |
| A15246 | Acute Toxicity                                                                               |
| A15247 | Acute Toxicity                                                                               |
| A15248 | Mutagenicity                                                                                 |
| A15249 | Mutagenicity                                                                                 |
| A15250 | Acute Toxicity                                                                               |
| A15251 | Acute Toxicity                                                                               |
| A15252 | Multiple Dose Effects                                                                        |
| A15253 | Skin and Eye Irritation                                                                      |
| A15254 | Acute Toxicity                                                                               |
| A15255 | Acute Toxicity                                                                               |
| A15256 | Acute Toxicity                                                                               |
| A15257 | Acute Toxicity                                                                               |
| A15258 | Acute Toxicity, Mutagenicity, Tumorigenicity, Skin and Eye Irritation,                       |

|        |                                                                                              |
|--------|----------------------------------------------------------------------------------------------|
| A15259 | Acute Toxicity, Tumorigenicity                                                               |
| A15260 | Mutagenicity                                                                                 |
| A15261 | Acute Toxicity                                                                               |
| A15262 | Acute Toxicity                                                                               |
| A15263 | Mutagenicity                                                                                 |
| A15264 | Acute Toxicity                                                                               |
| A15265 | Acute Toxicity                                                                               |
| A15266 | Acute Toxicity, Reproductive Effects, Multiple Dose Effects                                  |
| A15267 | Mutagenicity, Tumorigenicity                                                                 |
| A15268 | Acute Toxicity, Mutagenicity, Reproductive Effects, Multiple Dose Effects                    |
| A15269 | Mutagenicity                                                                                 |
| A15270 | Acute Toxicity, Multiple Dose Effects                                                        |
| A15271 | Acute Toxicity, Mutagenicity                                                                 |
| A15272 | Acute Toxicity, Mutagenicity, Tumorigenicity, Multiple Dose Effects                          |
| A15273 | Acute Toxicity, Mutagenicity                                                                 |
| A15274 | Acute Toxicity                                                                               |
| A15275 | Acute Toxicity, Multiple Dose Effects                                                        |
| A15276 | Mutagenicity                                                                                 |
| A15277 | Acute Toxicity, Mutagenicity, Tumorigenicity, Reproductive Effects                           |
| A15278 | Multiple Dose Effects                                                                        |
| A15279 | Mutagenicity                                                                                 |
| A15280 | Acute Toxicity                                                                               |
| A15281 | Acute Toxicity, Skin and Eye Irritation, Multiple Dose Effects                               |
| A15282 | Acute Toxicity, Mutagenicity, Tumorigenicity, Skin and Eye Irritation, Multiple Dose Effects |
| A15283 | Acute Toxicity, Mutagenicity, Skin and Eye Irritation                                        |
| A15284 | Multiple Dose Effects                                                                        |
| A15285 | Acute Toxicity, Skin and Eye Irritation                                                      |
| A15286 | Acute Toxicity                                                                               |
| A15287 | Acute Toxicity                                                                               |
| A15288 | Acute Toxicity                                                                               |
| A15289 | Multiple Dose Effects                                                                        |
| A15290 | Acute Toxicity, Skin and Eye Irritation                                                      |
| A15291 | Tumorigenicity                                                                               |
| A15292 | Acute Toxicity, Mutagenicity, Tumorigenicity, Reproductive Effects,                          |
| A15293 | Non-toxicity                                                                                 |
| A15294 | Non-toxicity                                                                                 |
| A15295 | Acute Toxicity, Mutagenicity, Reproductive Effects                                           |
| A15296 | Non-toxicity                                                                                 |
| A15297 | Acute Toxicity, Mutagenicity, Reproductive Effects, Multiple Dose Effects                    |
| A15298 | Mutagenicity                                                                                 |
| A15299 | Acute Toxicity                                                                               |
| A15300 | Non-toxicity                                                                                 |
| A15301 | Mutagenicity, Tumorigenicity, Multiple Dose Effects                                          |
| A15302 | Reproductive Effects, Multiple Dose Effects                                                  |
| A15303 | Non-toxicity                                                                                 |

|        |                                                                                              |
|--------|----------------------------------------------------------------------------------------------|
| A15304 | Mutagenicity                                                                                 |
| A15305 | Mutagenicity                                                                                 |
| A15306 | Acute Toxicity                                                                               |
| A15307 | Non-toxicity                                                                                 |
| A15308 | Acute Toxicity, Tumorigenicity, Skin and Eye Irritation, Multiple Dose                       |
| A15309 | Acute Toxicity, Multiple Dose Effects                                                        |
| A15310 | Acute Toxicity, Mutagenicity                                                                 |
| A15311 | Acute Toxicity, Mutagenicity, Reproductive Effects                                           |
| A15312 | Acute Toxicity, Mutagenicity, Tumorigenicity, Multiple Dose Effects                          |
| A15313 | Acute Toxicity, Mutagenicity, Tumorigenicity, Reproductive Effects,                          |
| A15314 | Acute Toxicity, Mutagenicity, Tumorigenicity, Skin and Eye Irritation, Multiple Dose Effects |
| A15315 | Acute Toxicity, Mutagenicity, Tumorigenicity, Reproductive Effects,                          |
| A15316 | Acute Toxicity, Mutagenicity                                                                 |
| A15317 | Acute Toxicity, Mutagenicity                                                                 |
| A15318 | Acute Toxicity, Mutagenicity, Tumorigenicity                                                 |
| A15319 | Acute Toxicity                                                                               |
| A15320 | Acute Toxicity, Multiple Dose Effects                                                        |
| A15321 | Acute Toxicity, Reproductive Effects, Multiple Dose Effects                                  |
| A15322 | Acute Toxicity, Mutagenicity, Tumorigenicity, Skin and Eye Irritation, Multiple Dose Effects |
| A15323 | Acute Toxicity, Multiple Dose Effects                                                        |
| A15324 | Acute Toxicity, Mutagenicity                                                                 |
| A15325 | Non-toxicity                                                                                 |
| A15326 | Reproductive Effects                                                                         |
| A15327 | Non-toxicity                                                                                 |
| A15328 | Acute Toxicity, Mutagenicity, Tumorigenicity, Skin and Eye Irritation,                       |
| A15329 | Acute Toxicity, Mutagenicity, Multiple Dose Effects                                          |
| A15330 | Acute Toxicity                                                                               |
| A15331 | Mutagenicity                                                                                 |
| A15332 | Mutagenicity                                                                                 |
| A15333 | Mutagenicity                                                                                 |
| A15334 | Acute Toxicity                                                                               |
| A15335 | Acute Toxicity, Multiple Dose Effects                                                        |
| A15336 | Mutagenicity                                                                                 |
| A15337 | Mutagenicity                                                                                 |
| A15338 | Acute Toxicity, Mutagenicity, Reproductive Effects, Multiple Dose Effects                    |
| A15339 | Mutagenicity                                                                                 |
| A15340 | Non-toxicity                                                                                 |
| A15341 | Mutagenicity                                                                                 |
| A15342 | Non-toxicity                                                                                 |
| A15343 | Non-toxicity                                                                                 |
| A15344 | Non-toxicity                                                                                 |
| A15345 | Acute Toxicity, Tumorigenicity, Reproductive Effects, Multiple Dose Effects                  |
| A15346 | Acute Toxicity, Tumorigenicity, Multiple Dose Effects                                        |
| A15347 | Acute Toxicity, Mutagenicity, Tumorigenicity, Reproductive Effects,                          |

|        |                                                                                                      |
|--------|------------------------------------------------------------------------------------------------------|
| A15348 | Acute Toxicity, Mutagenicity, Tumorigenicity, Multiple Dose Effects                                  |
| A15349 | Acute Toxicity, Mutagenicity, Tumorigenicity, Multiple Dose Effects                                  |
| A15350 | Non-toxicity                                                                                         |
| A15351 | Non-toxicity                                                                                         |
| A15352 | Acute Toxicity, Mutagenicity, Tumorigenicity, Multiple Dose Effects                                  |
| A15353 | Acute Toxicity, Mutagenicity                                                                         |
| A15354 | Acute Toxicity, Reproductive Effects                                                                 |
| A15355 | Acute Toxicity                                                                                       |
| A15356 | Acute Toxicity                                                                                       |
| A15357 | Multiple Dose Effects                                                                                |
| A15358 | Acute Toxicity, Mutagenicity, Reproductive Effects                                                   |
| A15359 | Acute Toxicity                                                                                       |
| A15360 | Mutagenicity, Tumorigenicity, Multiple Dose Effects                                                  |
| A15361 | Mutagenicity, Tumorigenicity, Multiple Dose Effects                                                  |
| A15362 | Reproductive Effects                                                                                 |
| A15363 | Mutagenicity, Reproductive Effects, Multiple Dose Effects                                            |
| A15364 | Multiple Dose Effects                                                                                |
| A15365 | Acute Toxicity, Mutagenicity, Reproductive Effects                                                   |
| A15366 | Acute Toxicity, Mutagenicity, Tumorigenicity, Reproductive Effects,                                  |
| A15367 | Acute Toxicity, Mutagenicity, Skin and Eye Irritation, Reproductive Effects, Multiple Dose Effects   |
| A15368 | Mutagenicity, Tumorigenicity                                                                         |
| A15369 | Acute Toxicity, Reproductive Effects, Multiple Dose Effects                                          |
| A15370 | Acute Toxicity, Tumorigenicity, Skin and Eye Irritation, Reproductive Effects, Multiple Dose Effects |
| A15371 | Acute Toxicity, Multiple Dose Effects                                                                |
| A15372 | Acute Toxicity, Mutagenicity, Reproductive Effects, Multiple Dose Effects                            |
| A15373 | Acute Toxicity, Multiple Dose Effects                                                                |
| A15374 | Acute Toxicity, Multiple Dose Effects                                                                |
| A15375 | Acute Toxicity                                                                                       |
| A15376 | Acute Toxicity, Mutagenicity                                                                         |
| A15377 | Acute Toxicity                                                                                       |
| A15378 | Acute Toxicity, Reproductive Effects                                                                 |
| A15379 | Acute Toxicity, Reproductive Effects, Multiple Dose Effects                                          |
| A15380 | Acute Toxicity, Multiple Dose Effects                                                                |
| A15381 | Acute Toxicity, Multiple Dose Effects                                                                |
| A15382 | Non-toxicity                                                                                         |
| A15383 | Non-toxicity                                                                                         |
| A15384 | Acute Toxicity, Multiple Dose Effects                                                                |
| A15385 | Multiple Dose Effects                                                                                |
| A15386 | Multiple Dose Effects                                                                                |
| A15387 | Multiple Dose Effects                                                                                |
| A15388 | Non-toxicity                                                                                         |
| A15389 | Acute Toxicity                                                                                       |
| A15390 | Mutagenicity                                                                                         |
| A15391 | Skin and Eye Irritation                                                                              |

|        |                                                                              |
|--------|------------------------------------------------------------------------------|
| A15392 | Skin and Eye Irritation                                                      |
| A15393 | Acute Toxicity                                                               |
| A15394 | Acute Toxicity, Multiple Dose Effects                                        |
| A15395 | Acute Toxicity, Mutagenicity, Skin and Eye Irritation, Multiple Dose Effects |
| A15396 | Acute Toxicity, Multiple Dose Effects                                        |
| A15397 | Acute Toxicity, Tumorigenicity, Multiple Dose Effects                        |
| A15398 | Acute Toxicity, Mutagenicity, Tumorigenicity                                 |
| A15399 | Tumorigenicity, Multiple Dose Effects                                        |
| A15400 | Multiple Dose Effects                                                        |
| A15401 | Mutagenicity, Tumorigenicity                                                 |
| A15402 | Multiple Dose Effects                                                        |
| A15403 | Acute Toxicity, Multiple Dose Effects                                        |
| A15404 | Multiple Dose Effects                                                        |
| A15405 | Acute Toxicity                                                               |
| A15406 | Acute Toxicity                                                               |
| A15407 | Tumorigenicity                                                               |
| A15408 | Acute Toxicity, Multiple Dose Effects                                        |
| A15409 | Non-toxicity                                                                 |
| A15410 | Non-toxicity                                                                 |
| A15411 | Acute Toxicity, Multiple Dose Effects                                        |
| A15412 | Multiple Dose Effects                                                        |
| A15413 | Acute Toxicity, Tumorigenicity, Multiple Dose Effects                        |
| A15414 | Acute Toxicity                                                               |
| A15415 | Acute Toxicity, Mutagenicity                                                 |
| A15416 | Acute Toxicity, Mutagenicity, Tumorigenicity, Multiple Dose Effects          |
| A15417 | Mutagenicity                                                                 |
| A15418 | Acute Toxicity                                                               |
| A15419 | Acute Toxicity, Mutagenicity, Tumorigenicity, Multiple Dose Effects          |
| A15420 | Acute Toxicity, Mutagenicity, Tumorigenicity, Skin and Eye Irritation        |
| A15421 | Tumorigenicity                                                               |
| A15422 | Acute Toxicity, Mutagenicity, Tumorigenicity, Multiple Dose Effects          |
| A15423 | Acute Toxicity, Mutagenicity, Skin and Eye Irritation                        |
| A15424 | Mutagenicity                                                                 |
| A15425 | Acute Toxicity, Mutagenicity, Skin and Eye Irritation                        |
| A15426 | Non-toxicity                                                                 |
| A15427 | Skin and Eye Irritation                                                      |
| A15428 | Acute Toxicity                                                               |
| A15429 | Acute Toxicity                                                               |
| A15430 | Acute Toxicity, Mutagenicity, Tumorigenicity, Skin and Eye Irritation,       |
| A15431 | Acute Toxicity, Mutagenicity, Multiple Dose Effects                          |
| A15432 | Mutagenicity, Multiple Dose Effects                                          |
| A15433 | Acute Toxicity                                                               |
| A15434 | Acute Toxicity, Mutagenicity, Tumorigenicity                                 |
| A15435 | Acute Toxicity, Mutagenicity, Multiple Dose Effects                          |
| A15436 | Acute Toxicity, Mutagenicity                                                 |
| A15437 | Acute Toxicity                                                               |

|        |                                                                           |
|--------|---------------------------------------------------------------------------|
| A15438 | Mutagenicity                                                              |
| A15439 | Mutagenicity                                                              |
| A15440 | Mutagenicity, Multiple Dose Effects                                       |
| A15441 | Mutagenicity                                                              |
| A15442 | Mutagenicity                                                              |
| A15443 | Mutagenicity                                                              |
| A15444 | Mutagenicity                                                              |
| A15445 | Acute Toxicity, Multiple Dose Effects                                     |
| A15446 | Mutagenicity                                                              |
| A15447 | Acute Toxicity, Mutagenicity                                              |
| A15448 | Mutagenicity                                                              |
| A15449 | Mutagenicity                                                              |
| A15450 | Mutagenicity                                                              |
| A15451 | Acute Toxicity, Mutagenicity                                              |
| A15452 | Mutagenicity, Tumorigenicity, Multiple Dose Effects                       |
| A15453 | Mutagenicity                                                              |
| A15454 | Acute Toxicity, Mutagenicity                                              |
| A15455 | Acute Toxicity                                                            |
| A15456 | Mutagenicity                                                              |
| A15457 | Mutagenicity, Tumorigenicity                                              |
| A15458 | Mutagenicity                                                              |
| A15459 | Multiple Dose Effects                                                     |
| A15460 | Mutagenicity                                                              |
| A15461 | Acute Toxicity, Mutagenicity, Multiple Dose Effects                       |
| A15462 | Acute Toxicity, Mutagenicity, Reproductive Effects, Multiple Dose Effects |
| A15463 | Acute Toxicity, Mutagenicity, Tumorigenicity, Reproductive Effects,       |
| A15464 | Multiple Dose Effects                                                     |
| A15465 | Acute Toxicity                                                            |
| A15466 | Mutagenicity                                                              |
| A15467 | Mutagenicity                                                              |
| A15468 | Acute Toxicity, Mutagenicity, Multiple Dose Effects                       |
| A15469 | Acute Toxicity, Mutagenicity, Multiple Dose Effects                       |
| A15470 | Acute Toxicity, Mutagenicity, Tumorigenicity, Multiple Dose Effects       |
| A15471 | Acute Toxicity, Mutagenicity, Tumorigenicity, Reproductive Effects,       |
| A15472 | Acute Toxicity, Mutagenicity, Multiple Dose Effects                       |
| A15473 | Acute Toxicity, Mutagenicity, Tumorigenicity                              |
| A15474 | Acute Toxicity                                                            |
| A15475 | Mutagenicity, Tumorigenicity                                              |
| A15476 | Acute Toxicity, Reproductive Effects, Multiple Dose Effects               |
| A15477 | Acute Toxicity                                                            |
| A15478 | Acute Toxicity, Mutagenicity, Multiple Dose Effects                       |
| A15479 | Multiple Dose Effects                                                     |
| A15480 | Acute Toxicity, Multiple Dose Effects                                     |
| A15481 | Multiple Dose Effects                                                     |
| A15482 | Acute Toxicity, Mutagenicity, Multiple Dose Effects                       |
| A15483 | Acute Toxicity                                                            |



|        |                                                                                                      |
|--------|------------------------------------------------------------------------------------------------------|
| A15484 | Acute Toxicity, Mutagenicity, Reproductive Effects, Multiple Dose Effects                            |
| A15485 | Acute Toxicity                                                                                       |
| A15486 | Acute Toxicity, Mutagenicity                                                                         |
| A15487 | Acute Toxicity, Multiple Dose Effects                                                                |
| A15488 | Acute Toxicity                                                                                       |
| A15489 | Acute Toxicity, Mutagenicity                                                                         |
| A15490 | Acute Toxicity                                                                                       |
| A15491 | Acute Toxicity                                                                                       |
| A15492 | Acute Toxicity, Reproductive Effects, Multiple Dose Effects                                          |
| A15493 | Mutagenicity                                                                                         |
| A15494 | Mutagenicity                                                                                         |
| A15495 | Acute Toxicity, Mutagenicity, Tumorigenicity, Reproductive Effects,                                  |
| A15496 | Acute Toxicity, Multiple Dose Effects                                                                |
| A15497 | Acute Toxicity, Reproductive Effects, Multiple Dose Effects                                          |
| A15498 | Multiple Dose Effects                                                                                |
| A15499 | Acute Toxicity                                                                                       |
| A15500 | Acute Toxicity                                                                                       |
| A15501 | Multiple Dose Effects                                                                                |
| A15502 | Acute Toxicity                                                                                       |
| A15503 | Acute Toxicity                                                                                       |
| A15504 | Acute Toxicity                                                                                       |
| A15505 | Mutagenicity, Reproductive Effects                                                                   |
| A15506 | Acute Toxicity, Mutagenicity, Reproductive Effects, Multiple Dose Effects                            |
| A15507 | Acute Toxicity, Reproductive Effects, Multiple Dose Effects                                          |
| A15508 | Multiple Dose Effects                                                                                |
| A15509 | Acute Toxicity                                                                                       |
| A15510 | Acute Toxicity, Mutagenicity                                                                         |
| A15511 | Acute Toxicity, Tumorigenicity                                                                       |
| A15512 | Acute Toxicity                                                                                       |
| A15513 | Acute Toxicity, Mutagenicity                                                                         |
| A15514 | Acute Toxicity                                                                                       |
| A15515 | Mutagenicity, Multiple Dose Effects                                                                  |
| A15516 | Acute Toxicity                                                                                       |
| A15517 | Acute Toxicity, Skin and Eye Irritation                                                              |
| A15518 | Acute Toxicity, Skin and Eye Irritation                                                              |
| A15519 | Acute Toxicity, Multiple Dose Effects                                                                |
| A15520 | Acute Toxicity, Reproductive Effects, Multiple Dose Effects                                          |
| A15521 | Acute Toxicity, Reproductive Effects, Multiple Dose Effects                                          |
| A15522 | Acute Toxicity                                                                                       |
| A15523 | Acute Toxicity                                                                                       |
| A15524 | Acute Toxicity, Tumorigenicity, Skin and Eye Irritation, Reproductive Effects, Multiple Dose Effects |
| A15525 | Acute Toxicity, Multiple Dose Effects                                                                |
| A15526 | Acute Toxicity                                                                                       |
| A15527 | Acute Toxicity                                                                                       |
| A15528 | Non-toxicity                                                                                         |

|        |                                                                                                      |
|--------|------------------------------------------------------------------------------------------------------|
| A15529 | Acute Toxicity, Multiple Dose Effects                                                                |
| A15530 | Acute Toxicity, Reproductive Effects, Multiple Dose Effects                                          |
| A15531 | Acute Toxicity, Skin and Eye Irritation                                                              |
| A15532 | Acute Toxicity, Multiple Dose Effects                                                                |
| A15533 | Acute Toxicity, Mutagenicity, Reproductive Effects, Multiple Dose Effects                            |
| A15534 | Acute Toxicity, Multiple Dose Effects                                                                |
| A15535 | Acute Toxicity, Multiple Dose Effects                                                                |
| A15536 | Acute Toxicity                                                                                       |
| A15537 | Acute Toxicity                                                                                       |
| A15538 | Acute Toxicity, Reproductive Effects                                                                 |
| A15539 | Acute Toxicity, Mutagenicity, Skin and Eye Irritation, Reproductive Effects, Multiple Dose Effects   |
| A15540 | Acute Toxicity, Reproductive Effects, Multiple Dose Effects                                          |
| A15541 | Multiple Dose Effects                                                                                |
| A15542 | Mutagenicity, Reproductive Effects, Multiple Dose Effects                                            |
| A15543 | Acute Toxicity, Reproductive Effects, Multiple Dose Effects                                          |
| A15544 | Acute Toxicity                                                                                       |
| A15545 | Acute Toxicity, Skin and Eye Irritation                                                              |
| A15546 | Acute Toxicity, Reproductive Effects, Multiple Dose Effects                                          |
| A15547 | Acute Toxicity                                                                                       |
| A15548 | Acute Toxicity                                                                                       |
| A15549 | Acute Toxicity                                                                                       |
| A15550 | Acute Toxicity                                                                                       |
| A15551 | Acute Toxicity                                                                                       |
| A15552 | Mutagenicity, Tumorigenicity, Reproductive Effects, Multiple Dose Effects                            |
| A15553 | Acute Toxicity, Mutagenicity                                                                         |
| A15554 | Mutagenicity                                                                                         |
| A15555 | Acute Toxicity, Reproductive Effects, Multiple Dose Effects                                          |
| A15556 | Acute Toxicity, Mutagenicity, Tumorigenicity, Reproductive Effects,                                  |
| A15557 | Acute Toxicity, Mutagenicity, Tumorigenicity, Reproductive Effects,                                  |
| A15558 | Acute Toxicity, Tumorigenicity, Skin and Eye Irritation, Reproductive Effects, Multiple Dose Effects |
| A15559 | Acute Toxicity, Reproductive Effects, Multiple Dose Effects                                          |
| A15560 | Acute Toxicity, Reproductive Effects, Multiple Dose Effects                                          |
| A15561 | Acute Toxicity, Multiple Dose Effects                                                                |
| A15562 | Acute Toxicity, Reproductive Effects, Multiple Dose Effects                                          |
| A15563 | Acute Toxicity, Reproductive Effects, Multiple Dose Effects                                          |
| A15564 | Acute Toxicity, Reproductive Effects, Multiple Dose Effects                                          |
| A15565 | Acute Toxicity, Reproductive Effects, Multiple Dose Effects                                          |
| A15566 | Mutagenicity                                                                                         |
| A15567 | Acute Toxicity, Reproductive Effects, Multiple Dose Effects                                          |
| A15568 | Reproductive Effects                                                                                 |
| A15569 | Skin and Eye Irritation                                                                              |
| A15570 | Acute Toxicity                                                                                       |
| A15571 | Non-toxicity                                                                                         |
| A15572 | Non-toxicity                                                                                         |

|        |                                                                              |
|--------|------------------------------------------------------------------------------|
| A15573 | Non-toxicity                                                                 |
| A15574 | Non-toxicity                                                                 |
| A15575 | Non-toxicity                                                                 |
| A15576 | Non-toxicity                                                                 |
| A15577 | Non-toxicity                                                                 |
| A15578 | Tumorigenicity                                                               |
| A15579 | Multiple Dose Effects                                                        |
| A15580 | Non-toxicity                                                                 |
| A15581 | Non-toxicity                                                                 |
| A15582 | Non-toxicity                                                                 |
| A15583 | Non-toxicity                                                                 |
| A15584 | Non-toxicity                                                                 |
| A15585 | Non-toxicity                                                                 |
| A15586 | Non-toxicity                                                                 |
| A15587 | Non-toxicity                                                                 |
| A15588 | Acute Toxicity                                                               |
| A15589 | Acute Toxicity, Mutagenicity, Multiple Dose Effects                          |
| A15590 | Acute Toxicity                                                               |
| A15591 | Reproductive Effects                                                         |
| A15592 | Mutagenicity, Reproductive Effects                                           |
| A15593 | Reproductive Effects                                                         |
| A15594 | Acute Toxicity                                                               |
| A15595 | Acute Toxicity, Reproductive Effects                                         |
| A15596 | Acute Toxicity                                                               |
| A15597 | Acute Toxicity                                                               |
| A15598 | Acute Toxicity, Mutagenicity, Multiple Dose Effects                          |
| A15599 | Acute Toxicity, Mutagenicity                                                 |
| A15600 | Mutagenicity                                                                 |
| A15601 | Acute Toxicity, Mutagenicity                                                 |
| A15602 | Acute Toxicity, Skin and Eye Irritation                                      |
| A15603 | Mutagenicity                                                                 |
| A15604 | Acute Toxicity, Mutagenicity                                                 |
| A15605 | Acute Toxicity, Mutagenicity, Skin and Eye Irritation                        |
| A15606 | Acute Toxicity, Mutagenicity, Tumorigenicity                                 |
| A15607 | Acute Toxicity, Skin and Eye Irritation                                      |
| A15608 | Mutagenicity                                                                 |
| A15609 | Acute Toxicity, Skin and Eye Irritation                                      |
| A15610 | Acute Toxicity                                                               |
| A15611 | Acute Toxicity, Multiple Dose Effects                                        |
| A15612 | Acute Toxicity                                                               |
| A15613 | Skin and Eye Irritation                                                      |
| A15614 | Non-toxicity                                                                 |
| A15615 | Non-toxicity                                                                 |
| A15616 | Non-toxicity                                                                 |
| A15617 | Multiple Dose Effects                                                        |
| A15618 | Acute Toxicity, Mutagenicity, Skin and Eye Irritation, Multiple Dose Effects |

|        |                                                                                                      |
|--------|------------------------------------------------------------------------------------------------------|
| A15619 | Acute Toxicity, Tumorigenicity, Multiple Dose Effects                                                |
| A15620 | Mutagenicity                                                                                         |
| A15621 | Mutagenicity                                                                                         |
| A15622 | Mutagenicity, Tumorigenicity                                                                         |
| A15623 | Acute Toxicity, Mutagenicity, Tumorigenicity, Skin and Eye Irritation, Multiple Dose Effects         |
| A15624 | Acute Toxicity, Tumorigenicity, Skin and Eye Irritation, Reproductive Effects, Multiple Dose Effects |
| A15625 | Acute Toxicity, Mutagenicity, Tumorigenicity, Reproductive Effects,                                  |
| A15626 | Acute Toxicity, Mutagenicity, Tumorigenicity                                                         |
| A15627 | Mutagenicity, Tumorigenicity                                                                         |
| A15628 | Acute Toxicity, Mutagenicity, Tumorigenicity, Reproductive Effects,                                  |
| A15629 | Acute Toxicity, Tumorigenicity, Multiple Dose Effects                                                |
| A15630 | Tumorigenicity                                                                                       |
| A15631 | Acute Toxicity, Reproductive Effects, Multiple Dose Effects                                          |
| A15632 | Tumorigenicity                                                                                       |
| A15633 | Acute Toxicity, Mutagenicity, Tumorigenicity, Multiple Dose Effects                                  |
| A15634 | Acute Toxicity, Mutagenicity, Tumorigenicity, Multiple Dose Effects                                  |
| A15635 | Acute Toxicity, Mutagenicity                                                                         |
| A15636 | Acute Toxicity, Mutagenicity, Tumorigenicity, Skin and Eye Irritation,                               |
| A15637 | Acute Toxicity, Mutagenicity, Tumorigenicity, Multiple Dose Effects                                  |
| A15638 | Mutagenicity, Tumorigenicity                                                                         |
| A15639 | Skin and Eye Irritation                                                                              |
| A15640 | Acute Toxicity                                                                                       |
| A15641 | Mutagenicity                                                                                         |
| A15642 | Acute Toxicity, Tumorigenicity, Skin and Eye Irritation                                              |
| A15643 | Acute Toxicity                                                                                       |
| A15644 | Acute Toxicity, Tumorigenicity, Reproductive Effects, Multiple Dose Effects                          |
| A15645 | Acute Toxicity, Reproductive Effects, Multiple Dose Effects                                          |
| A15646 | Skin and Eye Irritation                                                                              |
| A15647 | Reproductive Effects                                                                                 |
| A15648 | Acute Toxicity, Reproductive Effects, Multiple Dose Effects                                          |
| A15649 | Acute Toxicity                                                                                       |
| A15650 | Reproductive Effects                                                                                 |
| A15651 | Acute Toxicity                                                                                       |
| A15652 | Acute Toxicity, Skin and Eye Irritation, Multiple Dose Effects                                       |
| A15653 | Acute Toxicity, Reproductive Effects, Multiple Dose Effects                                          |
| A15654 | Acute Toxicity, Multiple Dose Effects                                                                |
| A15655 | Acute Toxicity, Reproductive Effects                                                                 |
| A15656 | Skin and Eye Irritation, Reproductive Effects                                                        |
| A15657 | Acute Toxicity, Reproductive Effects, Multiple Dose Effects                                          |
| A15658 | Acute Toxicity, Multiple Dose Effects                                                                |
| A15659 | Acute Toxicity                                                                                       |
| A15660 | Acute Toxicity, Mutagenicity, Reproductive Effects, Multiple Dose Effects                            |
| A15661 | Acute Toxicity, Multiple Dose Effects                                                                |
| A15662 | Acute Toxicity                                                                                       |

|        |                                                                                                       |
|--------|-------------------------------------------------------------------------------------------------------|
| A15663 | Acute Toxicity, Skin and Eye Irritation, Multiple Dose Effects                                        |
| A15664 | Acute Toxicity, Skin and Eye Irritation, Reproductive Effects, Multiple Dose                          |
| A15665 | Acute Toxicity, Mutagenicity, Tumorigenicity, Multiple Dose Effects                                   |
| A15666 | Acute Toxicity, Multiple Dose Effects                                                                 |
| A15667 | Acute Toxicity                                                                                        |
| A15668 | Acute Toxicity                                                                                        |
| A15669 | Mutagenicity, Reproductive Effects, Multiple Dose Effects                                             |
| A15670 | Mutagenicity                                                                                          |
| A15671 | Mutagenicity                                                                                          |
| A15672 | Mutagenicity                                                                                          |
| A15673 | Acute Toxicity                                                                                        |
| A15674 | Acute Toxicity                                                                                        |
| A15675 | Acute Toxicity, Mutagenicity                                                                          |
| A15676 | Tumorigenicity, Reproductive Effects                                                                  |
| A15677 | Mutagenicity                                                                                          |
| A15678 | Acute Toxicity                                                                                        |
| A15679 | Tumorigenicity, Reproductive Effects, Multiple Dose Effects                                           |
| A15680 | Acute Toxicity, Mutagenicity, Tumorigenicity, Reproductive Effects,                                   |
| A15681 | Multiple Dose Effects                                                                                 |
| A15682 | Acute Toxicity, Mutagenicity                                                                          |
| A15683 | Acute Toxicity, Mutagenicity, Skin and Eye Irritation, Reproductive Effects,<br>Multiple Dose Effects |
| A15684 | Acute Toxicity, Mutagenicity, Skin and Eye Irritation, Reproductive Effects,<br>Multiple Dose Effects |
| A15685 | Acute Toxicity, Mutagenicity                                                                          |
| A15686 | Non-toxicity                                                                                          |
| A15687 | Non-toxicity                                                                                          |
| A15688 | Reproductive Effects                                                                                  |
| A15689 | Acute Toxicity                                                                                        |
| A15690 | Tumorigenicity, Reproductive Effects, Multiple Dose Effects                                           |
| A15691 | Mutagenicity                                                                                          |
| A15692 | Non-toxicity                                                                                          |
| A15693 | Acute Toxicity                                                                                        |
| A15694 | Acute Toxicity                                                                                        |
| A15695 | Acute Toxicity                                                                                        |
| A15696 | Acute Toxicity, Tumorigenicity                                                                        |
| A15697 | Acute Toxicity                                                                                        |
| A15698 | Acute Toxicity                                                                                        |
| A15699 | Acute Toxicity                                                                                        |
| A15700 | Acute Toxicity                                                                                        |
| A15701 | Acute Toxicity, Multiple Dose Effects                                                                 |
| A15702 | Reproductive Effects                                                                                  |
| A15703 | Non-toxicity                                                                                          |
| A15704 | Acute Toxicity, Mutagenicity                                                                          |
| A15705 | Acute Toxicity, Multiple Dose Effects                                                                 |
| A15706 | Acute Toxicity, Reproductive Effects, Multiple Dose Effects                                           |

|        |                                                                              |
|--------|------------------------------------------------------------------------------|
| A15707 | Acute Toxicity                                                               |
| A15708 | Acute Toxicity                                                               |
| A15709 | Acute Toxicity, Multiple Dose Effects                                        |
| A15710 | Acute Toxicity                                                               |
| A15711 | Acute Toxicity                                                               |
| A15712 | Non-toxicity                                                                 |
| A15713 | Non-toxicity                                                                 |
| A15714 | Acute Toxicity, Mutagenicity, Skin and Eye Irritation, Multiple Dose Effects |
| A15715 | Acute Toxicity, Multiple Dose Effects                                        |
| A15716 | Acute Toxicity, Reproductive Effects, Multiple Dose Effects                  |
| A15717 | Acute Toxicity                                                               |
| A15718 | Acute Toxicity, Skin and Eye Irritation                                      |
| A15719 | Skin and Eye Irritation, Reproductive Effects                                |
| A15720 | Acute Toxicity, Multiple Dose Effects                                        |
| A15721 | Acute Toxicity                                                               |
| A15722 | Acute Toxicity                                                               |
| A15723 | Acute Toxicity                                                               |
| A15724 | Acute Toxicity, Multiple Dose Effects                                        |
| A15725 | Acute Toxicity                                                               |
| A15726 | Mutagenicity, Reproductive Effects, Multiple Dose Effects                    |
| A15727 | Acute Toxicity                                                               |
| A15728 | Acute Toxicity                                                               |
| A15729 | Acute Toxicity, Reproductive Effects, Multiple Dose Effects                  |
| A15730 | Acute Toxicity                                                               |
| A15731 | Acute Toxicity                                                               |
| A15732 | Acute Toxicity                                                               |
| A15733 | Acute Toxicity, Reproductive Effects, Multiple Dose Effects                  |
| A15734 | Acute Toxicity                                                               |
| A15735 | Acute Toxicity, Skin and Eye Irritation, Multiple Dose Effects               |
| A15736 | Acute Toxicity, Reproductive Effects                                         |
| A15737 | Acute Toxicity                                                               |
| A15738 | Acute Toxicity, Multiple Dose Effects                                        |
| A15739 | Multiple Dose Effects                                                        |
| A15740 | Multiple Dose Effects                                                        |
| A15741 | Acute Toxicity                                                               |
| A15742 | Acute Toxicity                                                               |
| A15743 | Acute Toxicity                                                               |
| A15744 | Acute Toxicity                                                               |
| A15745 | Multiple Dose Effects                                                        |
| A15746 | Acute Toxicity, Mutagenicity                                                 |
| A15747 | Acute Toxicity                                                               |
| A15748 | Acute Toxicity                                                               |
| A15749 | Acute Toxicity, Reproductive Effects                                         |
| A15750 | Acute Toxicity, Skin and Eye Irritation, Multiple Dose Effects               |
| A15751 | Acute Toxicity                                                               |
| A15752 | Tumorigenicity                                                               |

|        |                                                                                                    |
|--------|----------------------------------------------------------------------------------------------------|
| A15753 | Acute Toxicity                                                                                     |
| A15754 | Acute Toxicity                                                                                     |
| A15755 | Acute Toxicity                                                                                     |
| A15756 | Acute Toxicity, Multiple Dose Effects                                                              |
| A15757 | Reproductive Effects                                                                               |
| A15758 | Acute Toxicity                                                                                     |
| A15759 | Acute Toxicity, Multiple Dose Effects                                                              |
| A15760 | Acute Toxicity                                                                                     |
| A15761 | Acute Toxicity                                                                                     |
| A15762 | Acute Toxicity, Multiple Dose Effects                                                              |
| A15763 | Acute Toxicity                                                                                     |
| A15764 | Acute Toxicity                                                                                     |
| A15765 | Acute Toxicity, Reproductive Effects                                                               |
| A15766 | Acute Toxicity                                                                                     |
| A15767 | Acute Toxicity                                                                                     |
| A15768 | Acute Toxicity, Skin and Eye Irritation, Multiple Dose Effects                                     |
| A15769 | Acute Toxicity                                                                                     |
| A15770 | Mutagenicity, Reproductive Effects                                                                 |
| A15771 | Acute Toxicity, Multiple Dose Effects                                                              |
| A15772 | Acute Toxicity                                                                                     |
| A15773 | Acute Toxicity                                                                                     |
| A15774 | Acute Toxicity                                                                                     |
| A15775 | Acute Toxicity                                                                                     |
| A15776 | Acute Toxicity                                                                                     |
| A15777 | Acute Toxicity                                                                                     |
| A15778 | Acute Toxicity, Multiple Dose Effects                                                              |
| A15779 | Acute Toxicity, Reproductive Effects                                                               |
| A15780 | Non-toxicity                                                                                       |
| A15781 | Non-toxicity                                                                                       |
| A15782 | Non-toxicity                                                                                       |
| A15783 | Non-toxicity                                                                                       |
| A15784 | Non-toxicity                                                                                       |
| A15785 | Non-toxicity                                                                                       |
| A15786 | Non-toxicity                                                                                       |
| A15787 | Non-toxicity                                                                                       |
| A15788 | Mutagenicity                                                                                       |
| A15789 | Acute Toxicity                                                                                     |
| A15790 | Mutagenicity                                                                                       |
| A15791 | Acute Toxicity                                                                                     |
| A15792 | Acute Toxicity                                                                                     |
| A15793 | Acute Toxicity, Multiple Dose Effects                                                              |
| A15794 | Acute Toxicity                                                                                     |
| A15795 | Acute Toxicity, Mutagenicity, Skin and Eye Irritation, Reproductive Effects, Multiple Dose Effects |
| A15796 | Reproductive Effects                                                                               |
| A15797 | Acute Toxicity                                                                                     |

|        |                                                                                                    |
|--------|----------------------------------------------------------------------------------------------------|
| A15798 | Acute Toxicity                                                                                     |
| A15799 | Mutagenicity                                                                                       |
| A15800 | Acute Toxicity                                                                                     |
| A15801 | Acute Toxicity                                                                                     |
| A15802 | Acute Toxicity                                                                                     |
| A15803 | Skin and Eye Irritation                                                                            |
| A15804 | Multiple Dose Effects                                                                              |
| A15805 | Acute Toxicity, Multiple Dose Effects                                                              |
| A15806 | Acute Toxicity, Skin and Eye Irritation                                                            |
| A15807 | Multiple Dose Effects                                                                              |
| A15808 | Acute Toxicity                                                                                     |
| A15809 | Acute Toxicity, Mutagenicity, Multiple Dose Effects                                                |
| A15810 | Acute Toxicity                                                                                     |
| A15811 | Mutagenicity, Reproductive Effects                                                                 |
| A15812 | Acute Toxicity                                                                                     |
| A15813 | Acute Toxicity                                                                                     |
| A15814 | Multiple Dose Effects                                                                              |
| A15815 | Acute Toxicity                                                                                     |
| A15816 | Multiple Dose Effects                                                                              |
| A15817 | Multiple Dose Effects                                                                              |
| A15818 | Acute Toxicity, Multiple Dose Effects                                                              |
| A15819 | Acute Toxicity                                                                                     |
| A15820 | Acute Toxicity, Multiple Dose Effects                                                              |
| A15821 | Acute Toxicity, Skin and Eye Irritation                                                            |
| A15822 | Acute Toxicity                                                                                     |
| A15823 | Mutagenicity                                                                                       |
| A15824 | Acute Toxicity, Multiple Dose Effects                                                              |
| A15825 | Skin and Eye Irritation                                                                            |
| A15826 | Acute Toxicity, Mutagenicity, Multiple Dose Effects                                                |
| A15827 | Multiple Dose Effects                                                                              |
| A15828 | Acute Toxicity, Mutagenicity, Multiple Dose Effects                                                |
| A15829 | Acute Toxicity                                                                                     |
| A15830 | Mutagenicity                                                                                       |
| A15831 | Acute Toxicity, Multiple Dose Effects                                                              |
| A15832 | Mutagenicity                                                                                       |
| A15833 | Acute Toxicity                                                                                     |
| A15834 | Skin and Eye Irritation                                                                            |
| A15835 | Acute Toxicity                                                                                     |
| A15836 | Acute Toxicity                                                                                     |
| A15837 | Acute Toxicity, Mutagenicity, Skin and Eye Irritation, Reproductive Effects, Multiple Dose Effects |
| A15838 | Acute Toxicity, Mutagenicity, Tumorigenicity, Skin and Eye Irritation,                             |
| A15839 | Acute Toxicity, Mutagenicity                                                                       |
| A15840 | Acute Toxicity, Mutagenicity, Tumorigenicity                                                       |
| A15841 | Acute Toxicity                                                                                     |
| A15842 | Acute Toxicity                                                                                     |



|        |                                                                                                    |
|--------|----------------------------------------------------------------------------------------------------|
| A15843 | Acute Toxicity, Skin and Eye Irritation                                                            |
| A15844 | Mutagenicity                                                                                       |
| A15845 | Acute Toxicity                                                                                     |
| A15846 | Acute Toxicity, Skin and Eye Irritation                                                            |
| A15847 | Multiple Dose Effects                                                                              |
| A15848 | Non-toxicity                                                                                       |
| A15849 | Mutagenicity                                                                                       |
| A15850 | Multiple Dose Effects                                                                              |
| A15851 | Acute Toxicity, Mutagenicity                                                                       |
| A15852 | Acute Toxicity                                                                                     |
| A15853 | Acute Toxicity, Multiple Dose Effects                                                              |
| A15854 | Acute Toxicity                                                                                     |
| A15855 | Acute Toxicity, Multiple Dose Effects                                                              |
| A15856 | Multiple Dose Effects                                                                              |
| A15857 | Multiple Dose Effects                                                                              |
| A15858 | Acute Toxicity, Mutagenicity, Multiple Dose Effects                                                |
| A15859 | Acute Toxicity                                                                                     |
| A15860 | Mutagenicity                                                                                       |
| A15861 | Multiple Dose Effects                                                                              |
| A15862 | Non-toxicity                                                                                       |
| A15863 | Acute Toxicity                                                                                     |
| A15864 | Acute Toxicity                                                                                     |
| A15865 | Acute Toxicity                                                                                     |
| A15866 | Acute Toxicity                                                                                     |
| A15867 | Acute Toxicity                                                                                     |
| A15868 | Non-toxicity                                                                                       |
| A15869 | Non-toxicity                                                                                       |
| A15870 | Acute Toxicity, Skin and Eye Irritation                                                            |
| A15871 | Multiple Dose Effects                                                                              |
| A15872 | Acute Toxicity                                                                                     |
| A15873 | Acute Toxicity                                                                                     |
| A15874 | Acute Toxicity, Mutagenicity, Skin and Eye Irritation, Reproductive Effects, Multiple Dose Effects |
| A15875 | Acute Toxicity, Mutagenicity                                                                       |
| A15876 | Non-toxicity                                                                                       |
| A15877 | Skin and Eye Irritation                                                                            |
| A15878 | Acute Toxicity                                                                                     |
| A15879 | Acute Toxicity                                                                                     |
| A15880 | Acute Toxicity                                                                                     |
| A15881 | Acute Toxicity                                                                                     |
| A15882 | Acute Toxicity, Skin and Eye Irritation                                                            |
| A15883 | Acute Toxicity, Mutagenicity                                                                       |
| A15884 | Acute Toxicity                                                                                     |
| A15885 | Acute Toxicity, Mutagenicity, Skin and Eye Irritation, Multiple Dose Effects                       |
| A15886 | Mutagenicity                                                                                       |
| A15887 | Skin and Eye Irritation                                                                            |

|        |                                                                     |
|--------|---------------------------------------------------------------------|
| A15888 | Skin and Eye Irritation                                             |
| A15889 | Acute Toxicity                                                      |
| A15890 | Multiple Dose Effects                                               |
| A15891 | Acute Toxicity                                                      |
| A15892 | Acute Toxicity                                                      |
| A15893 | Multiple Dose Effects                                               |
| A15894 | Mutagenicity                                                        |
| A15895 | Skin and Eye Irritation                                             |
| A15896 | Mutagenicity, Skin and Eye Irritation, Multiple Dose Effects        |
| A15897 | Skin and Eye Irritation                                             |
| A15898 | Acute Toxicity                                                      |
| A15899 | Multiple Dose Effects                                               |
| A15900 | Mutagenicity                                                        |
| A15901 | Acute Toxicity                                                      |
| A15902 | Acute Toxicity                                                      |
| A15903 | Acute Toxicity                                                      |
| A15904 | Acute Toxicity, Multiple Dose Effects                               |
| A15905 | Acute Toxicity, Mutagenicity, Multiple Dose Effects                 |
| A15906 | Acute Toxicity                                                      |
| A15907 | Mutagenicity                                                        |
| A15908 | Acute Toxicity                                                      |
| A15909 | Mutagenicity, Tumorigenicity                                        |
| A15910 | Acute Toxicity                                                      |
| A15911 | Acute Toxicity, Mutagenicity                                        |
| A15912 | Acute Toxicity, Reproductive Effects, Multiple Dose Effects         |
| A15913 | Mutagenicity                                                        |
| A15914 | Acute Toxicity, Skin and Eye Irritation                             |
| A15915 | Acute Toxicity                                                      |
| A15916 | Acute Toxicity                                                      |
| A15917 | Acute Toxicity                                                      |
| A15918 | Acute Toxicity, Reproductive Effects, Multiple Dose Effects         |
| A15919 | Acute Toxicity                                                      |
| A15920 | Acute Toxicity                                                      |
| A15921 | Acute Toxicity                                                      |
| A15922 | Acute Toxicity, Multiple Dose Effects                               |
| A15923 | Acute Toxicity                                                      |
| A15924 | Acute Toxicity                                                      |
| A15925 | Acute Toxicity, Mutagenicity, Reproductive Effects                  |
| A15926 | Acute Toxicity                                                      |
| A15927 | Acute Toxicity                                                      |
| A15928 | Acute Toxicity                                                      |
| A15929 | Acute Toxicity, Multiple Dose Effects                               |
| A15930 | Non-toxicity                                                        |
| A15931 | Acute Toxicity, Mutagenicity, Tumorigenicity, Reproductive Effects, |
| A15932 | Acute Toxicity, Reproductive Effects, Multiple Dose Effects         |
| A15933 | Acute Toxicity                                                      |

|        |                                                                           |
|--------|---------------------------------------------------------------------------|
| A15934 | Mutagenicity, Reproductive Effects, Multiple Dose Effects                 |
| A15935 | Acute Toxicity                                                            |
| A15936 | Acute Toxicity                                                            |
| A15937 | Acute Toxicity                                                            |
| A15938 | Non-toxicity                                                              |
| A15939 | Skin and Eye Irritation                                                   |
| A15940 | Acute Toxicity                                                            |
| A15941 | Acute Toxicity, Multiple Dose Effects                                     |
| A15942 | Acute Toxicity, Reproductive Effects, Multiple Dose Effects               |
| A15943 | Acute Toxicity, Mutagenicity, Reproductive Effects, Multiple Dose Effects |
| A15944 | Acute Toxicity, Reproductive Effects, Multiple Dose Effects               |
| A15945 | Acute Toxicity, Reproductive Effects, Multiple Dose Effects               |
| A15946 | Acute Toxicity, Skin and Eye Irritation, Multiple Dose Effects            |
| A15947 | Non-toxicity                                                              |
| A15948 | Multiple Dose Effects                                                     |
| A15949 | Multiple Dose Effects                                                     |
| A15950 | Acute Toxicity                                                            |
| A15951 | Non-toxicity                                                              |
| A15952 | Acute Toxicity                                                            |
| A15953 | Acute Toxicity, Multiple Dose Effects                                     |
| A15954 | Acute Toxicity, Skin and Eye Irritation, Multiple Dose Effects            |
| A15955 | Acute Toxicity, Skin and Eye Irritation                                   |
| A15956 | Acute Toxicity, Mutagenicity                                              |
| A15957 | Skin and Eye Irritation, Multiple Dose Effects                            |
| A15958 | Acute Toxicity, Skin and Eye Irritation                                   |
| A15959 | Acute Toxicity                                                            |
| A15960 | Skin and Eye Irritation                                                   |
| A15961 | Acute Toxicity                                                            |
| A15962 | Acute Toxicity                                                            |
| A15963 | Mutagenicity                                                              |
| A15964 | Acute Toxicity                                                            |
| A15965 | Acute Toxicity, Skin and Eye Irritation                                   |
| A15966 | Acute Toxicity                                                            |
| A15967 | Acute Toxicity                                                            |
| A15968 | Acute Toxicity                                                            |
| A15969 | Acute Toxicity                                                            |
| A15970 | Acute Toxicity, Reproductive Effects, Multiple Dose Effects               |
| A15971 | Acute Toxicity, Mutagenicity                                              |
| A15972 | Acute Toxicity                                                            |
| A15973 | Acute Toxicity                                                            |
| A15974 | Acute Toxicity                                                            |
| A15975 | Multiple Dose Effects                                                     |
| A15976 | Mutagenicity, Tumorigenicity                                              |
| A15977 | Acute Toxicity                                                            |
| A15978 | Acute Toxicity                                                            |
| A15979 | Acute Toxicity                                                            |

|        |                                                                              |
|--------|------------------------------------------------------------------------------|
| A15980 | Acute Toxicity                                                               |
| A15981 | Acute Toxicity, Mutagenicity                                                 |
| A15982 | Acute Toxicity, Mutagenicity                                                 |
| A15983 | Skin and Eye Irritation                                                      |
| A15984 | Skin and Eye Irritation                                                      |
| A15985 | Acute Toxicity                                                               |
| A15986 | Reproductive Effects                                                         |
| A15987 | Acute Toxicity                                                               |
| A15988 | Acute Toxicity, Reproductive Effects                                         |
| A15989 | Acute Toxicity                                                               |
| A15990 | Acute Toxicity, Multiple Dose Effects                                        |
| A15991 | Acute Toxicity                                                               |
| A15992 | Acute Toxicity, Mutagenicity, Skin and Eye Irritation                        |
| A15993 | Acute Toxicity                                                               |
| A15994 | Acute Toxicity, Mutagenicity, Skin and Eye Irritation                        |
| A15995 | Acute Toxicity, Skin and Eye Irritation                                      |
| A15996 | Acute Toxicity, Skin and Eye Irritation                                      |
| A15997 | Non-toxicity                                                                 |
| A15998 | Acute Toxicity                                                               |
| A15999 | Skin and Eye Irritation, Multiple Dose Effects                               |
| A16000 | Acute Toxicity                                                               |
| A16001 | Acute Toxicity                                                               |
| A16002 | Acute Toxicity, Mutagenicity, Reproductive Effects, Multiple Dose Effects    |
| A16003 | Mutagenicity                                                                 |
| A16004 | Multiple Dose Effects                                                        |
| A16005 | Acute Toxicity, Mutagenicity                                                 |
| A16006 | Acute Toxicity                                                               |
| A16007 | Acute Toxicity, Skin and Eye Irritation                                      |
| A16008 | Acute Toxicity                                                               |
| A16009 | Acute Toxicity, Skin and Eye Irritation                                      |
| A16010 | Skin and Eye Irritation                                                      |
| A16011 | Acute Toxicity, Skin and Eye Irritation                                      |
| A16012 | Acute Toxicity                                                               |
| A16013 | Non-toxicity                                                                 |
| A16014 | Acute Toxicity, Skin and Eye Irritation                                      |
| A16015 | Acute Toxicity                                                               |
| A16016 | Acute Toxicity                                                               |
| A16017 | Multiple Dose Effects                                                        |
| A16018 | Acute Toxicity, Mutagenicity, Tumorigenicity, Multiple Dose Effects          |
| A16019 | Acute Toxicity                                                               |
| A16020 | Acute Toxicity                                                               |
| A16021 | Acute Toxicity, Mutagenicity, Skin and Eye Irritation, Multiple Dose Effects |
| A16022 | Acute Toxicity                                                               |
| A16023 | Acute Toxicity                                                               |
| A16024 | Acute Toxicity, Multiple Dose Effects                                        |
| A16025 | Non-toxicity                                                                 |

|        |                                                                              |
|--------|------------------------------------------------------------------------------|
| A16026 | Acute Toxicity, Mutagenicity, Reproductive Effects, Multiple Dose Effects    |
| A16027 | Acute Toxicity, Mutagenicity, Reproductive Effects, Multiple Dose Effects    |
| A16028 | Acute Toxicity, Mutagenicity, Multiple Dose Effects                          |
| A16029 | Acute Toxicity                                                               |
| A16030 | Tumorigenicity                                                               |
| A16031 | Acute Toxicity, Skin and Eye Irritation                                      |
| A16032 | Acute Toxicity                                                               |
| A16033 | Acute Toxicity, Multiple Dose Effects                                        |
| A16034 | Acute Toxicity, Mutagenicity, Reproductive Effects                           |
| A16035 | Acute Toxicity                                                               |
| A16036 | Acute Toxicity, Mutagenicity, Skin and Eye Irritation                        |
| A16037 | Acute Toxicity                                                               |
| A16038 | Mutagenicity, Skin and Eye Irritation                                        |
| A16039 | Acute Toxicity                                                               |
| A16040 | Acute Toxicity                                                               |
| A16041 | Multiple Dose Effects                                                        |
| A16042 | Mutagenicity, Tumorigenicity                                                 |
| A16043 | Mutagenicity                                                                 |
| A16044 | Acute Toxicity                                                               |
| A16045 | Acute Toxicity                                                               |
| A16046 | Mutagenicity                                                                 |
| A16047 | Acute Toxicity, Mutagenicity                                                 |
| A16048 | Acute Toxicity, Mutagenicity, Multiple Dose Effects                          |
| A16049 | Mutagenicity                                                                 |
| A16050 | Mutagenicity                                                                 |
| A16051 | Acute Toxicity                                                               |
| A16052 | Mutagenicity                                                                 |
| A16053 | Acute Toxicity                                                               |
| A16054 | Acute Toxicity                                                               |
| A16055 | Acute Toxicity                                                               |
| A16056 | Reproductive Effects, Multiple Dose Effects                                  |
| A16057 | Skin and Eye Irritation                                                      |
| A16058 | Mutagenicity                                                                 |
| A16059 | Acute Toxicity                                                               |
| A16060 | Acute Toxicity                                                               |
| A16061 | Reproductive Effects                                                         |
| A16062 | Acute Toxicity, Mutagenicity                                                 |
| A16063 | Acute Toxicity, Multiple Dose Effects                                        |
| A16064 | Multiple Dose Effects                                                        |
| A16065 | Acute Toxicity                                                               |
| A16066 | Skin and Eye Irritation                                                      |
| A16067 | Acute Toxicity, Skin and Eye Irritation, Reproductive Effects, Multiple Dose |
| A16068 | Acute Toxicity, Mutagenicity, Tumorigenicity, Skin and Eye Irritation,       |
| A16069 | Acute Toxicity, Mutagenicity                                                 |
| A16070 | Acute Toxicity, Mutagenicity, Reproductive Effects                           |
| A16071 | Skin and Eye Irritation                                                      |

|        |                                                                                                    |
|--------|----------------------------------------------------------------------------------------------------|
| A16072 | Acute Toxicity                                                                                     |
| A16073 | Acute Toxicity, Mutagenicity, Reproductive Effects, Multiple Dose Effects                          |
| A16074 | Acute Toxicity, Mutagenicity, Tumorigenicity                                                       |
| A16075 | Acute Toxicity                                                                                     |
| A16076 | Acute Toxicity, Multiple Dose Effects                                                              |
| A16077 | Mutagenicity, Multiple Dose Effects                                                                |
| A16078 | Non-toxicity                                                                                       |
| A16079 | Mutagenicity                                                                                       |
| A16080 | Non-toxicity                                                                                       |
| A16081 | Acute Toxicity                                                                                     |
| A16082 | Non-toxicity                                                                                       |
| A16083 | Non-toxicity                                                                                       |
| A16084 | Non-toxicity                                                                                       |
| A16085 | Non-toxicity                                                                                       |
| A16086 | Acute Toxicity                                                                                     |
| A16087 | Acute Toxicity, Mutagenicity, Tumorigenicity, Skin and Eye Irritation,                             |
| A16088 | Acute Toxicity, Mutagenicity, Skin and Eye Irritation, Reproductive Effects, Multiple Dose Effects |
| A16089 | Non-toxicity                                                                                       |
| A16090 | Acute Toxicity                                                                                     |
| A16091 | Acute Toxicity                                                                                     |
| A16092 | Acute Toxicity, Multiple Dose Effects                                                              |
| A16093 | Acute Toxicity                                                                                     |
| A16094 | Acute Toxicity                                                                                     |
| A16095 | Acute Toxicity                                                                                     |
| A16096 | Acute Toxicity                                                                                     |
| A16097 | Acute Toxicity                                                                                     |
| A16098 | Acute Toxicity, Skin and Eye Irritation                                                            |
| A16099 | Acute Toxicity, Mutagenicity, Skin and Eye Irritation, Multiple Dose Effects                       |
| A16100 | Acute Toxicity, Multiple Dose Effects                                                              |
| A16101 | Mutagenicity                                                                                       |
| A16102 | Acute Toxicity                                                                                     |
| A16103 | Acute Toxicity                                                                                     |
| A16104 | Acute Toxicity                                                                                     |
| A16105 | Acute Toxicity                                                                                     |
| A16106 | Acute Toxicity                                                                                     |
| A16107 | Acute Toxicity                                                                                     |
| A16108 | Acute Toxicity                                                                                     |
| A16109 | Multiple Dose Effects                                                                              |
| A16110 | Acute Toxicity                                                                                     |
| A16111 | Acute Toxicity, Skin and Eye Irritation                                                            |
| A16112 | Acute Toxicity                                                                                     |
| A16113 | Multiple Dose Effects                                                                              |
| A16114 | Acute Toxicity, Multiple Dose Effects                                                              |
| A16115 | Multiple Dose Effects                                                                              |
| A16116 | Acute Toxicity, Mutagenicity                                                                       |

|        |                                                                              |
|--------|------------------------------------------------------------------------------|
| A16117 | Tumorigenicity, Multiple Dose Effects                                        |
| A16118 | Acute Toxicity                                                               |
| A16119 | Mutagenicity                                                                 |
| A16120 | Acute Toxicity                                                               |
| A16121 | Acute Toxicity, Mutagenicity, Tumorigenicity, Multiple Dose Effects          |
| A16122 | Reproductive Effects                                                         |
| A16123 | Acute Toxicity, Tumorigenicity                                               |
| A16124 | Non-toxicity                                                                 |
| A16125 | Acute Toxicity                                                               |
| A16126 | Acute Toxicity                                                               |
| A16127 | Acute Toxicity, Skin and Eye Irritation, Reproductive Effects, Multiple Dose |
| A16128 | Acute Toxicity, Skin and Eye Irritation, Multiple Dose Effects               |
| A16129 | Multiple Dose Effects                                                        |
| A16130 | Multiple Dose Effects                                                        |
| A16131 | Acute Toxicity                                                               |
| A16132 | Acute Toxicity, Mutagenicity, Multiple Dose Effects                          |
| A16133 | Acute Toxicity                                                               |
| A16134 | Acute Toxicity, Mutagenicity, Skin and Eye Irritation, Multiple Dose Effects |
| A16135 | Tumorigenicity                                                               |
| A16136 | Acute Toxicity, Multiple Dose Effects                                        |
| A16137 | Acute Toxicity                                                               |
| A16138 | Mutagenicity                                                                 |
| A16139 | Acute Toxicity                                                               |
| A16140 | Mutagenicity                                                                 |
| A16141 | Tumorigenicity                                                               |
| A16142 | Mutagenicity                                                                 |
| A16143 | Acute Toxicity, Mutagenicity                                                 |
| A16144 | Acute Toxicity, Mutagenicity, Reproductive Effects, Multiple Dose Effects    |
| A16145 | Acute Toxicity                                                               |
| A16146 | Acute Toxicity                                                               |
| A16147 | Mutagenicity                                                                 |
| A16148 | Mutagenicity                                                                 |
| A16149 | Acute Toxicity                                                               |
| A16150 | Mutagenicity                                                                 |
| A16151 | Acute Toxicity                                                               |
| A16152 | Acute Toxicity, Mutagenicity                                                 |
| A16153 | Acute Toxicity                                                               |
| A16154 | Mutagenicity                                                                 |
| A16155 | Mutagenicity                                                                 |
| A16156 | Acute Toxicity                                                               |
| A16157 | Acute Toxicity, Multiple Dose Effects                                        |
| A16158 | Mutagenicity                                                                 |
| A16159 | Acute Toxicity                                                               |
| A16160 | Mutagenicity                                                                 |
| A16161 | Acute Toxicity, Multiple Dose Effects                                        |
| A16162 | Acute Toxicity                                                               |

|        |                              |
|--------|------------------------------|
| A16163 | Acute Toxicity               |
| A16164 | Acute Toxicity               |
| A16165 | Mutagenicity                 |
| A16166 | Mutagenicity                 |
| A16167 | Acute Toxicity, Mutagenicity |
| A16168 | Mutagenicity                 |
| A16169 | Mutagenicity                 |
| A16170 | Mutagenicity                 |
| A16171 | Mutagenicity                 |
| A16172 | Mutagenicity                 |
| A16173 | Mutagenicity                 |
| A16174 | Mutagenicity                 |
| A16175 | Mutagenicity                 |
| A16176 | Mutagenicity                 |
| A16177 | Non-toxicity                 |
| A16178 | Mutagenicity                 |
| A16179 | Mutagenicity                 |
| A16180 | Mutagenicity                 |
| A16181 | Mutagenicity                 |
| A16182 | Mutagenicity                 |
| A16183 | Mutagenicity                 |
| A16184 | Mutagenicity                 |
| A16185 | Mutagenicity                 |
| A16186 | Mutagenicity                 |
| A16187 | Acute Toxicity               |
| A16188 | Acute Toxicity               |
| A16189 | Tumorigenicity               |
| A16190 | Mutagenicity                 |
| A16191 | Acute Toxicity               |
| A16192 | Acute Toxicity               |
| A16193 | Acute Toxicity               |
| A16194 | Mutagenicity                 |
| A16195 | Mutagenicity                 |
| A16196 | Acute Toxicity               |
| A16197 | Acute Toxicity               |
| A16198 | Acute Toxicity               |
| A16199 | Acute Toxicity               |
| A16200 | Acute Toxicity               |
| A16201 | Acute Toxicity               |
| A16202 | Acute Toxicity               |
| A16203 | Acute Toxicity               |
| A16204 | Acute Toxicity               |
| A16205 | Acute Toxicity               |
| A16206 | Acute Toxicity               |
| A16207 | Acute Toxicity               |
| A16208 | Acute Toxicity               |



|        |                                                                              |
|--------|------------------------------------------------------------------------------|
| A16209 | Acute Toxicity                                                               |
| A16210 | Acute Toxicity                                                               |
| A16211 | Acute Toxicity                                                               |
| A16212 | Acute Toxicity, Multiple Dose Effects                                        |
| A16213 | Acute Toxicity                                                               |
| A16214 | Mutagenicity                                                                 |
| A16215 | Acute Toxicity                                                               |
| A16216 | Acute Toxicity, Tumorigenicity, Skin and Eye Irritation, Multiple Dose       |
| A16217 | Acute Toxicity                                                               |
| A16218 | Acute Toxicity                                                               |
| A16219 | Acute Toxicity                                                               |
| A16220 | Mutagenicity                                                                 |
| A16221 | Acute Toxicity                                                               |
| A16222 | Acute Toxicity                                                               |
| A16223 | Acute Toxicity                                                               |
| A16224 | Acute Toxicity, Multiple Dose Effects                                        |
| A16225 | Acute Toxicity, Mutagenicity, Skin and Eye Irritation, Multiple Dose Effects |
| A16226 | Acute Toxicity, Skin and Eye Irritation, Reproductive Effects, Multiple Dose |
| A16227 | Tumorigenicity                                                               |
| A16228 | Acute Toxicity, Reproductive Effects, Multiple Dose Effects                  |
| A16229 | Acute Toxicity                                                               |
| A16230 | Acute Toxicity                                                               |
| A16231 | Acute Toxicity, Skin and Eye Irritation, Multiple Dose Effects               |
| A16232 | Acute Toxicity                                                               |
| A16233 | Acute Toxicity                                                               |
| A16234 | Acute Toxicity, Multiple Dose Effects                                        |
| A16235 | Acute Toxicity                                                               |
| A16236 | Acute Toxicity                                                               |
| A16237 | Acute Toxicity                                                               |
| A16238 | Acute Toxicity                                                               |
| A16239 | Acute Toxicity                                                               |
| A16240 | Acute Toxicity                                                               |
| A16241 | Acute Toxicity                                                               |
| A16242 | Acute Toxicity, Skin and Eye Irritation                                      |
| A16243 | Acute Toxicity                                                               |
| A16244 | Acute Toxicity                                                               |
| A16245 | Acute Toxicity                                                               |
| A16246 | Acute Toxicity                                                               |
| A16247 | Acute Toxicity                                                               |
| A16248 | Mutagenicity                                                                 |
| A16249 | Acute Toxicity                                                               |
| A16250 | Acute Toxicity                                                               |
| A16251 | Acute Toxicity                                                               |
| A16252 | Acute Toxicity                                                               |
| A16253 | Acute Toxicity                                                               |
| A16254 | Acute Toxicity                                                               |

|        |                                                                                                    |
|--------|----------------------------------------------------------------------------------------------------|
| A16255 | Acute Toxicity                                                                                     |
| A16256 | Acute Toxicity                                                                                     |
| A16257 | Acute Toxicity                                                                                     |
| A16258 | Reproductive Effects                                                                               |
| A16259 | Acute Toxicity                                                                                     |
| A16260 | Acute Toxicity                                                                                     |
| A16261 | Acute Toxicity                                                                                     |
| A16262 | Acute Toxicity, Mutagenicity, Tumorigenicity, Reproductive Effects,                                |
| A16263 | Acute Toxicity, Tumorigenicity, Multiple Dose Effects                                              |
| A16264 | Mutagenicity                                                                                       |
| A16265 | Acute Toxicity                                                                                     |
| A16266 | Acute Toxicity                                                                                     |
| A16267 | Mutagenicity                                                                                       |
| A16268 | Mutagenicity                                                                                       |
| A16269 | Acute Toxicity, Multiple Dose Effects                                                              |
| A16270 | Mutagenicity                                                                                       |
| A16271 | Mutagenicity                                                                                       |
| A16272 | Acute Toxicity                                                                                     |
| A16273 | Acute Toxicity                                                                                     |
| A16274 | Acute Toxicity, Mutagenicity, Tumorigenicity, Reproductive Effects                                 |
| A16275 | Acute Toxicity                                                                                     |
| A16276 | Acute Toxicity                                                                                     |
| A16277 | Acute Toxicity, Multiple Dose Effects                                                              |
| A16278 | Acute Toxicity                                                                                     |
| A16279 | Acute Toxicity, Mutagenicity                                                                       |
| A16280 | Acute Toxicity                                                                                     |
| A16281 | Acute Toxicity, Mutagenicity, Tumorigenicity                                                       |
| A16282 | Acute Toxicity, Skin and Eye Irritation                                                            |
| A16283 | Acute Toxicity, Mutagenicity, Multiple Dose Effects                                                |
| A16284 | Acute Toxicity, Mutagenicity, Multiple Dose Effects                                                |
| A16285 | Acute Toxicity                                                                                     |
| A16286 | Acute Toxicity, Tumorigenicity, Reproductive Effects, Multiple Dose Effects                        |
| A16287 | Acute Toxicity                                                                                     |
| A16288 | Reproductive Effects, Multiple Dose Effects                                                        |
| A16289 | Non-toxicity                                                                                       |
| A16290 | Acute Toxicity, Mutagenicity                                                                       |
| A16291 | Acute Toxicity                                                                                     |
| A16292 | Mutagenicity, Tumorigenicity, Reproductive Effects, Multiple Dose Effects                          |
| A16293 | Acute Toxicity                                                                                     |
| A16294 | Acute Toxicity, Reproductive Effects, Multiple Dose Effects                                        |
| A16295 | Acute Toxicity, Reproductive Effects                                                               |
| A16296 | Non-toxicity                                                                                       |
| A16297 | Acute Toxicity, Multiple Dose Effects                                                              |
| A16298 | Acute Toxicity                                                                                     |
| A16299 | Acute Toxicity, Mutagenicity, Skin and Eye Irritation, Reproductive Effects, Multiple Dose Effects |

|        |                                                                                                    |
|--------|----------------------------------------------------------------------------------------------------|
| A16300 | Multiple Dose Effects                                                                              |
| A16301 | Acute Toxicity                                                                                     |
| A16302 | Acute Toxicity                                                                                     |
| A16303 | Multiple Dose Effects                                                                              |
| A16304 | Acute Toxicity, Multiple Dose Effects                                                              |
| A16305 | Acute Toxicity                                                                                     |
| A16306 | Acute Toxicity                                                                                     |
| A16307 | Acute Toxicity, Multiple Dose Effects                                                              |
| A16308 | Mutagenicity                                                                                       |
| A16309 | Acute Toxicity                                                                                     |
| A16310 | Multiple Dose Effects                                                                              |
| A16311 | Acute Toxicity                                                                                     |
| A16312 | Acute Toxicity                                                                                     |
| A16313 | Non-toxicity                                                                                       |
| A16314 | Multiple Dose Effects                                                                              |
| A16315 | Non-toxicity                                                                                       |
| A16316 | Acute Toxicity                                                                                     |
| A16317 | Multiple Dose Effects                                                                              |
| A16318 | Acute Toxicity                                                                                     |
| A16319 | Acute Toxicity                                                                                     |
| A16320 | Acute Toxicity                                                                                     |
| A16321 | Acute Toxicity, Skin and Eye Irritation                                                            |
| A16322 | Acute Toxicity, Reproductive Effects, Multiple Dose Effects                                        |
| A16323 | Acute Toxicity                                                                                     |
| A16324 | Tumorigenicity                                                                                     |
| A16325 | Acute Toxicity, Multiple Dose Effects                                                              |
| A16326 | Acute Toxicity                                                                                     |
| A16327 | Acute Toxicity                                                                                     |
| A16328 | Acute Toxicity, Mutagenicity, Multiple Dose Effects                                                |
| A16329 | Acute Toxicity                                                                                     |
| A16330 | Acute Toxicity                                                                                     |
| A16331 | Acute Toxicity                                                                                     |
| A16332 | Acute Toxicity, Mutagenicity, Skin and Eye Irritation, Reproductive Effects, Multiple Dose Effects |
| A16333 | Acute Toxicity, Mutagenicity, Multiple Dose Effects                                                |
| A16334 | Acute Toxicity                                                                                     |
| A16335 | Acute Toxicity, Reproductive Effects, Multiple Dose Effects                                        |
| A16336 | Reproductive Effects                                                                               |
| A16337 | Mutagenicity                                                                                       |
| A16338 | Mutagenicity                                                                                       |
| A16339 | Mutagenicity                                                                                       |
| A16340 | Mutagenicity                                                                                       |
| A16341 | Mutagenicity                                                                                       |
| A16342 | Skin and Eye Irritation                                                                            |
| A16343 | Acute Toxicity                                                                                     |
| A16344 | Acute Toxicity                                                                                     |

|        |                                                                                                    |
|--------|----------------------------------------------------------------------------------------------------|
| A16345 | Acute Toxicity, Multiple Dose Effects                                                              |
| A16346 | Acute Toxicity                                                                                     |
| A16347 | Acute Toxicity                                                                                     |
| A16348 | Acute Toxicity                                                                                     |
| A16349 | Acute Toxicity                                                                                     |
| A16350 | Mutagenicity                                                                                       |
| A16351 | Acute Toxicity                                                                                     |
| A16352 | Mutagenicity                                                                                       |
| A16353 | Acute Toxicity, Mutagenicity, Skin and Eye Irritation                                              |
| A16354 | Acute Toxicity                                                                                     |
| A16355 | Mutagenicity                                                                                       |
| A16356 | Acute Toxicity, Mutagenicity                                                                       |
| A16357 | Acute Toxicity                                                                                     |
| A16358 | Acute Toxicity, Reproductive Effects, Multiple Dose Effects                                        |
| A16359 | Acute Toxicity                                                                                     |
| A16360 | Acute Toxicity, Mutagenicity, Skin and Eye Irritation, Reproductive Effects, Multiple Dose Effects |
| A16361 | Acute Toxicity                                                                                     |
| A16362 | Acute Toxicity                                                                                     |
| A16363 | Acute Toxicity                                                                                     |
| A16364 | Acute Toxicity, Reproductive Effects, Multiple Dose Effects                                        |
| A16365 | Mutagenicity                                                                                       |
| A16366 | Acute Toxicity                                                                                     |
| A16367 | Mutagenicity, Tumorigenicity, Reproductive Effects                                                 |
| A16368 | Acute Toxicity, Mutagenicity, Multiple Dose Effects                                                |
| A16369 | Acute Toxicity                                                                                     |
| A16370 | Reproductive Effects                                                                               |
| A16371 | Acute Toxicity                                                                                     |
| A16372 | Acute Toxicity                                                                                     |
| A16373 | Reproductive Effects                                                                               |
| A16374 | Acute Toxicity                                                                                     |
| A16375 | Mutagenicity, Reproductive Effects                                                                 |
| A16376 | Acute Toxicity                                                                                     |
| A16377 | Acute Toxicity                                                                                     |
| A16378 | Non-toxicity                                                                                       |
| A16379 | Acute Toxicity                                                                                     |
| A16380 | Reproductive Effects                                                                               |
| A16381 | Tumorigenicity, Reproductive Effects                                                               |
| A16382 | Acute Toxicity, Mutagenicity                                                                       |
| A16383 | Reproductive Effects                                                                               |
| A16384 | Acute Toxicity                                                                                     |
| A16385 | Acute Toxicity                                                                                     |
| A16386 | Acute Toxicity                                                                                     |
| A16387 | Acute Toxicity                                                                                     |
| A16388 | Acute Toxicity                                                                                     |
| A16389 | Acute Toxicity                                                                                     |

|        |                                                                           |
|--------|---------------------------------------------------------------------------|
| A16390 | Reproductive Effects                                                      |
| A16391 | Acute Toxicity                                                            |
| A16392 | Acute Toxicity                                                            |
| A16393 | Non-toxicity                                                              |
| A16394 | Acute Toxicity, Mutagenicity, Reproductive Effects, Multiple Dose Effects |
| A16395 | Acute Toxicity                                                            |
| A16396 | Acute Toxicity, Mutagenicity                                              |
| A16397 | Reproductive Effects                                                      |
| A16398 | Skin and Eye Irritation                                                   |
| A16399 | Acute Toxicity                                                            |
| A16400 | Acute Toxicity, Mutagenicity, Multiple Dose Effects                       |
| A16401 | Acute Toxicity                                                            |
| A16402 | Acute Toxicity, Mutagenicity                                              |
| A16403 | Acute Toxicity, Reproductive Effects                                      |
| A16404 | Acute Toxicity                                                            |
| A16405 | Non-toxicity                                                              |
| A16406 | Acute Toxicity                                                            |
| A16407 | Acute Toxicity                                                            |
| A16408 | Acute Toxicity, Mutagenicity, Reproductive Effects, Multiple Dose Effects |
| A16409 | Acute Toxicity                                                            |
| A16410 | Multiple Dose Effects                                                     |
| A16411 | Multiple Dose Effects                                                     |
| A16412 | Acute Toxicity                                                            |
| A16413 | Acute Toxicity                                                            |
| A16414 | Reproductive Effects                                                      |
| A16415 | Acute Toxicity                                                            |
| A16416 | Mutagenicity, Tumorigenicity                                              |
| A16417 | Acute Toxicity, Multiple Dose Effects                                     |
| A16418 | Acute Toxicity, Skin and Eye Irritation                                   |
| A16419 | Acute Toxicity                                                            |
| A16420 | Mutagenicity                                                              |
| A16421 | Skin and Eye Irritation                                                   |
| A16422 | Acute Toxicity, Multiple Dose Effects                                     |
| A16423 | Mutagenicity                                                              |
| A16424 | Non-toxicity                                                              |
| A16425 | Skin and Eye Irritation                                                   |
| A16426 | Acute Toxicity                                                            |
| A16427 | Tumorigenicity                                                            |
| A16428 | Acute Toxicity                                                            |
| A16429 | Reproductive Effects                                                      |
| A16430 | Acute Toxicity, Reproductive Effects                                      |
| A16431 | Acute Toxicity, Multiple Dose Effects                                     |
| A16432 | Mutagenicity, Tumorigenicity, Reproductive Effects, Multiple Dose Effects |
| A16433 | Multiple Dose Effects                                                     |
| A16434 | Reproductive Effects                                                      |
| A16435 | Acute Toxicity                                                            |

|        |                                                                           |
|--------|---------------------------------------------------------------------------|
| A16436 | Mutagenicity                                                              |
| A16437 | Acute Toxicity                                                            |
| A16438 | Mutagenicity                                                              |
| A16439 | Mutagenicity                                                              |
| A16440 | Non-toxicity                                                              |
| A16441 | Acute Toxicity                                                            |
| A16442 | Acute Toxicity                                                            |
| A16443 | Acute Toxicity                                                            |
| A16444 | Acute Toxicity                                                            |
| A16445 | Mutagenicity, Tumorigenicity                                              |
| A16446 | Acute Toxicity                                                            |
| A16447 | Tumorigenicity, Reproductive Effects, Multiple Dose Effects               |
| A16448 | Acute Toxicity                                                            |
| A16449 | Reproductive Effects, Multiple Dose Effects                               |
| A16450 | Acute Toxicity, Mutagenicity, Multiple Dose Effects                       |
| A16451 | Reproductive Effects                                                      |
| A16452 | Acute Toxicity, Mutagenicity, Reproductive Effects, Multiple Dose Effects |
| A16453 | Acute Toxicity                                                            |
| A16454 | Acute Toxicity                                                            |
| A16455 | Reproductive Effects                                                      |
| A16456 | Reproductive Effects                                                      |
| A16457 | Acute Toxicity                                                            |
| A16458 | Acute Toxicity, Multiple Dose Effects                                     |
| A16459 | Multiple Dose Effects                                                     |
| A16460 | Acute Toxicity                                                            |
| A16461 | Acute Toxicity                                                            |
| A16462 | Acute Toxicity, Multiple Dose Effects                                     |
| A16463 | Acute Toxicity                                                            |
| A16464 | Acute Toxicity                                                            |
| A16465 | Acute Toxicity                                                            |
| A16466 | Multiple Dose Effects                                                     |
| A16467 | Acute Toxicity, Multiple Dose Effects                                     |
| A16468 | Acute Toxicity                                                            |
| A16469 | Acute Toxicity                                                            |
| A16470 | Mutagenicity                                                              |
| A16471 | Reproductive Effects                                                      |
| A16472 | Acute Toxicity, Multiple Dose Effects                                     |
| A16473 | Multiple Dose Effects                                                     |
| A16474 | Acute Toxicity                                                            |
| A16475 | Acute Toxicity                                                            |
| A16476 | Acute Toxicity                                                            |
| A16477 | Acute Toxicity, Multiple Dose Effects                                     |
| A16478 | Acute Toxicity, Mutagenicity, Reproductive Effects, Multiple Dose Effects |
| A16479 | Acute Toxicity                                                            |
| A16480 | Tumorigenicity                                                            |
| A16481 | Reproductive Effects                                                      |

|        |                                       |
|--------|---------------------------------------|
| A16482 | Acute Toxicity                        |
| A16483 | Acute Toxicity                        |
| A16484 | Acute Toxicity                        |
| A16485 | Acute Toxicity                        |
| A16486 | Tumorigenicity, Reproductive Effects  |
| A16487 | Acute Toxicity                        |
| A16488 | Acute Toxicity                        |
| A16489 | Mutagenicity                          |
| A16490 | Acute Toxicity                        |
| A16491 | Acute Toxicity                        |
| A16492 | Acute Toxicity                        |
| A16493 | Tumorigenicity                        |
| A16494 | Mutagenicity                          |
| A16495 | Tumorigenicity                        |
| A16496 | Acute Toxicity                        |
| A16497 | Multiple Dose Effects                 |
| A16498 | Acute Toxicity                        |
| A16499 | Acute Toxicity                        |
| A16500 | Acute Toxicity, Multiple Dose Effects |
| A16501 | Acute Toxicity                        |
| A16502 | Tumorigenicity                        |
| A16503 | Mutagenicity                          |
| A16504 | Multiple Dose Effects                 |
| A16505 | Reproductive Effects                  |
| A16506 | Reproductive Effects                  |
| A16507 | Multiple Dose Effects                 |
| A16508 | Acute Toxicity                        |
| A16509 | Multiple Dose Effects                 |
| A16510 | Acute Toxicity                        |
| A16511 | Mutagenicity, Tumorigenicity          |
| A16512 | Mutagenicity                          |
| A16513 | Acute Toxicity, Mutagenicity          |
| A16514 | Mutagenicity                          |
| A16515 | Mutagenicity                          |
| A16516 | Mutagenicity                          |
| A16517 | Mutagenicity                          |
| A16518 | Mutagenicity                          |
| A16519 | Mutagenicity                          |
| A16520 | Tumorigenicity                        |
| A16521 | Tumorigenicity                        |
| A16522 | Mutagenicity                          |
| A16523 | Mutagenicity                          |
| A16524 | Mutagenicity                          |
| A16525 | Mutagenicity                          |
| A16526 | Multiple Dose Effects                 |
| A16527 | Acute Toxicity, Mutagenicity          |

|        |                                                                           |
|--------|---------------------------------------------------------------------------|
| A16528 | Acute Toxicity, Multiple Dose Effects                                     |
| A16529 | Acute Toxicity, Mutagenicity, Reproductive Effects, Multiple Dose Effects |
| A16530 | Reproductive Effects                                                      |
| A16531 | Acute Toxicity                                                            |
| A16532 | Multiple Dose Effects                                                     |
| A16533 | Acute Toxicity, Multiple Dose Effects                                     |
| A16534 | Tumorigenicity                                                            |
| A16535 | Mutagenicity                                                              |
| A16536 | Acute Toxicity                                                            |
| A16537 | Acute Toxicity                                                            |
| A16538 | Acute Toxicity                                                            |
| A16539 | Acute Toxicity                                                            |
| A16540 | Acute Toxicity                                                            |
| A16541 | Acute Toxicity                                                            |
| A16542 | Acute Toxicity                                                            |
| A16543 | Mutagenicity                                                              |
| A16544 | Acute Toxicity                                                            |
| A16545 | Skin and Eye Irritation                                                   |
| A16546 | Multiple Dose Effects                                                     |
| A16547 | Non-toxicity                                                              |
| A16548 | Acute Toxicity                                                            |
| A16549 | Acute Toxicity                                                            |
| A16550 | Acute Toxicity                                                            |
| A16551 | Acute Toxicity                                                            |
| A16552 | Mutagenicity, Multiple Dose Effects                                       |
| A16553 | Multiple Dose Effects                                                     |
| A16554 | Non-toxicity                                                              |
| A16555 | Multiple Dose Effects                                                     |
| A16556 | Acute Toxicity                                                            |
| A16557 | Non-toxicity                                                              |
| A16558 | Multiple Dose Effects                                                     |
| A16559 | Multiple Dose Effects                                                     |
| A16560 | Acute Toxicity, Reproductive Effects                                      |
| A16561 | Mutagenicity                                                              |
| A16562 | Mutagenicity, Tumorigenicity                                              |
| A16563 | Reproductive Effects                                                      |
| A16564 | Non-toxicity                                                              |
| A16565 | Acute Toxicity, Multiple Dose Effects                                     |
| A16566 | Multiple Dose Effects                                                     |
| A16567 | Acute Toxicity, Multiple Dose Effects                                     |
| A16568 | Acute Toxicity                                                            |
| A16569 | Acute Toxicity                                                            |
| A16570 | Acute Toxicity                                                            |
| A16571 | Acute Toxicity                                                            |
| A16572 | Acute Toxicity                                                            |
| A16573 | Acute Toxicity                                                            |



|        |                                                             |
|--------|-------------------------------------------------------------|
| A16574 | Acute Toxicity                                              |
| A16575 | Acute Toxicity                                              |
| A16576 | Acute Toxicity                                              |
| A16577 | Acute Toxicity                                              |
| A16578 | Acute Toxicity                                              |
| A16579 | Multiple Dose Effects                                       |
| A16580 | Acute Toxicity                                              |
| A16581 | Acute Toxicity                                              |
| A16582 | Multiple Dose Effects                                       |
| A16583 | Acute Toxicity, Multiple Dose Effects                       |
| A16584 | Tumorigenicity                                              |
| A16585 | Acute Toxicity                                              |
| A16586 | Acute Toxicity                                              |
| A16587 | Acute Toxicity                                              |
| A16588 | Acute Toxicity                                              |
| A16589 | Acute Toxicity, Multiple Dose Effects                       |
| A16590 | Acute Toxicity                                              |
| A16591 | Acute Toxicity                                              |
| A16592 | Non-toxicity                                                |
| A16593 | Non-toxicity                                                |
| A16594 | Non-toxicity                                                |
| A16595 | Mutagenicity                                                |
| A16596 | Acute Toxicity, Multiple Dose Effects                       |
| A16597 | Reproductive Effects, Multiple Dose Effects                 |
| A16598 | Acute Toxicity                                              |
| A16599 | Acute Toxicity                                              |
| A16600 | Acute Toxicity                                              |
| A16601 | Acute Toxicity                                              |
| A16602 | Mutagenicity                                                |
| A16603 | Acute Toxicity, Multiple Dose Effects                       |
| A16604 | Acute Toxicity                                              |
| A16605 | Mutagenicity                                                |
| A16606 | Acute Toxicity, Multiple Dose Effects                       |
| A16607 | Tumorigenicity, Multiple Dose Effects                       |
| A16608 | Acute Toxicity, Multiple Dose Effects                       |
| A16609 | Tumorigenicity                                              |
| A16610 | Acute Toxicity                                              |
| A16611 | Skin and Eye Irritation, Multiple Dose Effects              |
| A16612 | Acute Toxicity, Reproductive Effects, Multiple Dose Effects |
| A16613 | Acute Toxicity, Skin and Eye Irritation                     |
| A16614 | Tumorigenicity                                              |
| A16615 | Acute Toxicity                                              |
| A16616 | Mutagenicity                                                |
| A16617 | Reproductive Effects, Multiple Dose Effects                 |
| A16618 | Acute Toxicity                                              |
| A16619 | Acute Toxicity                                              |

|        |                                                                           |
|--------|---------------------------------------------------------------------------|
| A16620 | Acute Toxicity                                                            |
| A16621 | Non-toxicity                                                              |
| A16622 | Acute Toxicity                                                            |
| A16623 | Multiple Dose Effects                                                     |
| A16624 | Acute Toxicity                                                            |
| A16625 | Non-toxicity                                                              |
| A16626 | Acute Toxicity, Mutagenicity, Tumorigenicity, Reproductive Effects,       |
| A16627 | Acute Toxicity, Multiple Dose Effects                                     |
| A16628 | Acute Toxicity                                                            |
| A16629 | Acute Toxicity                                                            |
| A16630 | Acute Toxicity                                                            |
| A16631 | Acute Toxicity, Multiple Dose Effects                                     |
| A16632 | Acute Toxicity                                                            |
| A16633 | Acute Toxicity, Multiple Dose Effects                                     |
| A16634 | Skin and Eye Irritation                                                   |
| A16635 | Acute Toxicity, Mutagenicity, Tumorigenicity, Reproductive Effects,       |
| A16636 | Acute Toxicity, Mutagenicity, Tumorigenicity, Skin and Eye Irritation,    |
| A16637 | Acute Toxicity                                                            |
| A16638 | Acute Toxicity                                                            |
| A16639 | Non-toxicity                                                              |
| A16640 | Non-toxicity                                                              |
| A16641 | Non-toxicity                                                              |
| A16642 | Acute Toxicity, Mutagenicity                                              |
| A16643 | Acute Toxicity, Mutagenicity                                              |
| A16644 | Acute Toxicity, Mutagenicity                                              |
| A16645 | Acute Toxicity                                                            |
| A16646 | Acute Toxicity, Reproductive Effects, Multiple Dose Effects               |
| A16647 | Acute Toxicity                                                            |
| A16648 | Acute Toxicity                                                            |
| A16649 | Acute Toxicity, Mutagenicity, Reproductive Effects, Multiple Dose Effects |
| A16650 | Acute Toxicity, Multiple Dose Effects                                     |
| A16651 | Acute Toxicity, Reproductive Effects                                      |
| A16652 | Reproductive Effects                                                      |
| A16653 | Acute Toxicity                                                            |
| A16654 | Acute Toxicity                                                            |
| A16655 | Acute Toxicity, Reproductive Effects, Multiple Dose Effects               |
| A16656 | Reproductive Effects                                                      |
| A16657 | Acute Toxicity, Mutagenicity                                              |
| A16658 | Acute Toxicity                                                            |
| A16659 | Acute Toxicity                                                            |
| A16660 | Acute Toxicity, Multiple Dose Effects                                     |
| A16661 | Acute Toxicity                                                            |
| A16662 | Acute Toxicity                                                            |
| A16663 | Non-toxicity                                                              |
| A16664 | Acute Toxicity, Multiple Dose Effects                                     |
| A16665 | Acute Toxicity                                                            |

|        |                                                             |
|--------|-------------------------------------------------------------|
| A16666 | Acute Toxicity                                              |
| A16667 | Acute Toxicity, Mutagenicity                                |
| A16668 | Acute Toxicity, Multiple Dose Effects                       |
| A16669 | Acute Toxicity, Tumorigenicity, Multiple Dose Effects       |
| A16670 | Mutagenicity                                                |
| A16671 | Acute Toxicity                                              |
| A16672 | Mutagenicity                                                |
| A16673 | Acute Toxicity                                              |
| A16674 | Acute Toxicity                                              |
| A16675 | Acute Toxicity, Multiple Dose Effects                       |
| A16676 | Multiple Dose Effects                                       |
| A16677 | Acute Toxicity, Multiple Dose Effects                       |
| A16678 | Multiple Dose Effects                                       |
| A16679 | Acute Toxicity                                              |
| A16680 | Acute Toxicity                                              |
| A16681 | Multiple Dose Effects                                       |
| A16682 | Acute Toxicity                                              |
| A16683 | Acute Toxicity                                              |
| A16684 | Acute Toxicity, Multiple Dose Effects                       |
| A16685 | Acute Toxicity                                              |
| A16686 | Acute Toxicity                                              |
| A16687 | Acute Toxicity                                              |
| A16688 | Acute Toxicity                                              |
| A16689 | Multiple Dose Effects                                       |
| A16690 | Non-toxicity                                                |
| A16691 | Multiple Dose Effects                                       |
| A16692 | Non-toxicity                                                |
| A16693 | Acute Toxicity, Multiple Dose Effects                       |
| A16694 | Multiple Dose Effects                                       |
| A16695 | Multiple Dose Effects                                       |
| A16696 | Acute Toxicity, Multiple Dose Effects                       |
| A16697 | Acute Toxicity                                              |
| A16698 | Acute Toxicity                                              |
| A16699 | Acute Toxicity                                              |
| A16700 | Acute Toxicity                                              |
| A16701 | Non-toxicity                                                |
| A16702 | Acute Toxicity, Multiple Dose Effects                       |
| A16703 | Non-toxicity                                                |
| A16704 | Acute Toxicity                                              |
| A16705 | Acute Toxicity, Reproductive Effects, Multiple Dose Effects |
| A16706 | Acute Toxicity                                              |
| A16707 | Multiple Dose Effects                                       |
| A16708 | Multiple Dose Effects                                       |
| A16709 | Acute Toxicity, Multiple Dose Effects                       |
| A16710 | Multiple Dose Effects                                       |
| A16711 | Acute Toxicity, Multiple Dose Effects                       |

|        |                                                                              |
|--------|------------------------------------------------------------------------------|
| A16712 | Multiple Dose Effects                                                        |
| A16713 | Multiple Dose Effects                                                        |
| A16714 | Multiple Dose Effects                                                        |
| A16715 | Multiple Dose Effects                                                        |
| A16716 | Mutagenicity                                                                 |
| A16717 | Acute Toxicity                                                               |
| A16718 | Mutagenicity                                                                 |
| A16719 | Mutagenicity                                                                 |
| A16720 | Acute Toxicity                                                               |
| A16721 | Mutagenicity                                                                 |
| A16722 | Mutagenicity                                                                 |
| A16723 | Acute Toxicity, Mutagenicity, Tumorigenicity                                 |
| A16724 | Acute Toxicity                                                               |
| A16725 | Acute Toxicity                                                               |
| A16726 | Acute Toxicity, Reproductive Effects                                         |
| A16727 | Acute Toxicity                                                               |
| A16728 | Acute Toxicity                                                               |
| A16729 | Acute Toxicity                                                               |
| A16730 | Acute Toxicity, Tumorigenicity                                               |
| A16731 | Acute Toxicity, Mutagenicity                                                 |
| A16732 | Acute Toxicity, Mutagenicity                                                 |
| A16733 | Acute Toxicity                                                               |
| A16734 | Acute Toxicity                                                               |
| A16735 | Acute Toxicity                                                               |
| A16736 | Acute Toxicity, Mutagenicity, Tumorigenicity                                 |
| A16737 | Acute Toxicity                                                               |
| A16738 | Acute Toxicity, Mutagenicity, Multiple Dose Effects                          |
| A16739 | Acute Toxicity, Multiple Dose Effects                                        |
| A16740 | Mutagenicity                                                                 |
| A16741 | Acute Toxicity, Mutagenicity, Tumorigenicity, Reproductive Effects,          |
| A16742 | Acute Toxicity, Reproductive Effects                                         |
| A16743 | Acute Toxicity, Mutagenicity, Skin and Eye Irritation, Multiple Dose Effects |
| A16744 | Acute Toxicity, Multiple Dose Effects                                        |
| A16745 | Acute Toxicity, Mutagenicity, Tumorigenicity                                 |
| A16746 | Acute Toxicity                                                               |
| A16747 | Acute Toxicity                                                               |
| A16748 | Acute Toxicity                                                               |
| A16749 | Acute Toxicity                                                               |
| A16750 | Acute Toxicity                                                               |
| A16751 | Skin and Eye Irritation                                                      |
| A16752 | Acute Toxicity, Tumorigenicity                                               |
| A16753 | Acute Toxicity                                                               |
| A16754 | Non-toxicity                                                                 |
| A16755 | Acute Toxicity                                                               |
| A16756 | Acute Toxicity, Multiple Dose Effects                                        |
| A16757 | Acute Toxicity                                                               |

|        |                                                             |
|--------|-------------------------------------------------------------|
| A16758 | Reproductive Effects                                        |
| A16759 | Acute Toxicity                                              |
| A16760 | Acute Toxicity                                              |
| A16761 | Mutagenicity                                                |
| A16762 | Multiple Dose Effects                                       |
| A16763 | Acute Toxicity, Mutagenicity, Multiple Dose Effects         |
| A16764 | Acute Toxicity, Multiple Dose Effects                       |
| A16765 | Acute Toxicity                                              |
| A16766 | Acute Toxicity, Reproductive Effects, Multiple Dose Effects |
| A16767 | Acute Toxicity, Multiple Dose Effects                       |
| A16768 | Acute Toxicity                                              |
| A16769 | Acute Toxicity, Mutagenicity, Reproductive Effects          |
| A16770 | Acute Toxicity                                              |
| A16771 | Mutagenicity                                                |
| A16772 | Acute Toxicity                                              |
| A16773 | Acute Toxicity                                              |
| A16774 | Acute Toxicity, Multiple Dose Effects                       |
| A16775 | Tumorigenicity                                              |
| A16776 | Mutagenicity, Multiple Dose Effects                         |
| A16777 | Skin and Eye Irritation                                     |
| A16778 | Acute Toxicity                                              |
| A16779 | Mutagenicity                                                |
| A16780 | Acute Toxicity                                              |
| A16781 | Acute Toxicity                                              |
| A16782 | Acute Toxicity                                              |
| A16783 | Acute Toxicity, Multiple Dose Effects                       |
| A16784 | Acute Toxicity                                              |
| A16785 | Acute Toxicity                                              |
| A16786 | Acute Toxicity                                              |
| A16787 | Acute Toxicity                                              |
| A16788 | Multiple Dose Effects                                       |
| A16789 | Acute Toxicity                                              |
| A16790 | Acute Toxicity                                              |
| A16791 | Acute Toxicity                                              |
| A16792 | Acute Toxicity, Tumorigenicity, Multiple Dose Effects       |
| A16793 | Acute Toxicity, Multiple Dose Effects                       |
| A16794 | Acute Toxicity                                              |
| A16795 | Acute Toxicity                                              |
| A16796 | Acute Toxicity                                              |
| A16797 | Multiple Dose Effects                                       |
| A16798 | Acute Toxicity                                              |
| A16799 | Multiple Dose Effects                                       |
| A16800 | Multiple Dose Effects                                       |
| A16801 | Acute Toxicity, Multiple Dose Effects                       |
| A16802 | Multiple Dose Effects                                       |
| A16803 | Acute Toxicity                                              |

|        |                                                             |
|--------|-------------------------------------------------------------|
| A16804 | Multiple Dose Effects                                       |
| A16805 | Acute Toxicity, Multiple Dose Effects                       |
| A16806 | Multiple Dose Effects                                       |
| A16807 | Acute Toxicity, Mutagenicity                                |
| A16808 | Acute Toxicity, Multiple Dose Effects                       |
| A16809 | Acute Toxicity                                              |
| A16810 | Multiple Dose Effects                                       |
| A16811 | Acute Toxicity                                              |
| A16812 | Non-toxicity                                                |
| A16813 | Acute Toxicity                                              |
| A16814 | Acute Toxicity                                              |
| A16815 | Multiple Dose Effects                                       |
| A16816 | Acute Toxicity                                              |
| A16817 | Multiple Dose Effects                                       |
| A16818 | Acute Toxicity                                              |
| A16819 | Acute Toxicity                                              |
| A16820 | Acute Toxicity, Multiple Dose Effects                       |
| A16821 | Reproductive Effects                                        |
| A16822 | Acute Toxicity, Reproductive Effects, Multiple Dose Effects |
| A16823 | Reproductive Effects                                        |
| A16824 | Acute Toxicity, Multiple Dose Effects                       |
| A16825 | Multiple Dose Effects                                       |
| A16826 | Acute Toxicity                                              |
| A16827 | Acute Toxicity, Multiple Dose Effects                       |
| A16828 | Acute Toxicity, Multiple Dose Effects                       |
| A16829 | Multiple Dose Effects                                       |
| A16830 | Acute Toxicity, Multiple Dose Effects                       |
| A16831 | Acute Toxicity, Multiple Dose Effects                       |
| A16832 | Multiple Dose Effects                                       |
| A16833 | Acute Toxicity                                              |
| A16834 | Acute Toxicity                                              |
| A16835 | Non-toxicity                                                |
| A16836 | Reproductive Effects, Multiple Dose Effects                 |
| A16837 | Acute Toxicity                                              |
| A16838 | Acute Toxicity, Multiple Dose Effects                       |
| A16839 | Multiple Dose Effects                                       |
| A16840 | Acute Toxicity, Multiple Dose Effects                       |
| A16841 | Acute Toxicity, Multiple Dose Effects                       |
| A16842 | Acute Toxicity                                              |
| A16843 | Skin and Eye Irritation                                     |
| A16844 | Acute Toxicity, Multiple Dose Effects                       |
| A16845 | Acute Toxicity                                              |
| A16846 | Multiple Dose Effects                                       |
| A16847 | Acute Toxicity                                              |
| A16848 | Multiple Dose Effects                                       |
| A16849 | Acute Toxicity, Multiple Dose Effects                       |

|        |                                       |
|--------|---------------------------------------|
| A16850 | Non-toxicity                          |
| A16851 | Acute Toxicity                        |
| A16852 | Multiple Dose Effects                 |
| A16853 | Multiple Dose Effects                 |
| A16854 | Acute Toxicity, Multiple Dose Effects |
| A16855 | Acute Toxicity                        |
| A16856 | Acute Toxicity                        |
| A16857 | Non-toxicity                          |
| A16858 | Acute Toxicity                        |
| A16859 | Acute Toxicity, Multiple Dose Effects |
| A16860 | Acute Toxicity, Multiple Dose Effects |
| A16861 | Acute Toxicity                        |
| A16862 | Acute Toxicity, Multiple Dose Effects |
| A16863 | Non-toxicity                          |
| A16864 | Multiple Dose Effects                 |
| A16865 | Acute Toxicity                        |
| A16866 | Non-toxicity                          |
| A16867 | Multiple Dose Effects                 |
| A16868 | Acute Toxicity, Multiple Dose Effects |
| A16869 | Acute Toxicity, Multiple Dose Effects |
| A16870 | Multiple Dose Effects                 |
| A16871 | Acute Toxicity, Multiple Dose Effects |
| A16872 | Multiple Dose Effects                 |
| A16873 | Acute Toxicity                        |
| A16874 | Acute Toxicity, Multiple Dose Effects |
| A16875 | Multiple Dose Effects                 |
| A16876 | Acute Toxicity, Multiple Dose Effects |
| A16877 | Acute Toxicity                        |
| A16878 | Multiple Dose Effects                 |
| A16879 | Acute Toxicity, Multiple Dose Effects |
| A16880 | Multiple Dose Effects                 |
| A16881 | Multiple Dose Effects                 |
| A16882 | Multiple Dose Effects                 |
| A16883 | Multiple Dose Effects                 |
| A16884 | Multiple Dose Effects                 |
| A16885 | Acute Toxicity, Multiple Dose Effects |
| A16886 | Acute Toxicity, Multiple Dose Effects |
| A16887 | Acute Toxicity                        |
| A16888 | Acute Toxicity                        |
| A16889 | Acute Toxicity                        |
| A16890 | Non-toxicity                          |
| A16891 | Non-toxicity                          |
| A16892 | Multiple Dose Effects                 |
| A16893 | Acute Toxicity                        |
| A16894 | Multiple Dose Effects                 |
| A16895 | Acute Toxicity                        |

|        |                                                     |
|--------|-----------------------------------------------------|
| A16896 | Acute Toxicity, Multiple Dose Effects               |
| A16897 | Acute Toxicity                                      |
| A16898 | Multiple Dose Effects                               |
| A16899 | Acute Toxicity, Multiple Dose Effects               |
| A16900 | Acute Toxicity                                      |
| A16901 | Multiple Dose Effects                               |
| A16902 | Acute Toxicity                                      |
| A16903 | Acute Toxicity                                      |
| A16904 | Tumorigenicity, Multiple Dose Effects               |
| A16905 | Multiple Dose Effects                               |
| A16906 | Multiple Dose Effects                               |
| A16907 | Multiple Dose Effects                               |
| A16908 | Acute Toxicity                                      |
| A16909 | Acute Toxicity                                      |
| A16910 | Non-toxicity                                        |
| A16911 | Acute Toxicity                                      |
| A16912 | Acute Toxicity                                      |
| A16913 | Acute Toxicity, Multiple Dose Effects               |
| A16914 | Acute Toxicity                                      |
| A16915 | Acute Toxicity, Multiple Dose Effects               |
| A16916 | Non-toxicity                                        |
| A16917 | Acute Toxicity, Multiple Dose Effects               |
| A16918 | Multiple Dose Effects                               |
| A16919 | Skin and Eye Irritation                             |
| A16920 | Acute Toxicity                                      |
| A16921 | Mutagenicity, Skin and Eye Irritation               |
| A16922 | Acute Toxicity                                      |
| A16923 | Acute Toxicity                                      |
| A16924 | Multiple Dose Effects                               |
| A16925 | Acute Toxicity, Multiple Dose Effects               |
| A16926 | Acute Toxicity                                      |
| A16927 | Reproductive Effects                                |
| A16928 | Multiple Dose Effects                               |
| A16929 | Multiple Dose Effects                               |
| A16930 | Acute Toxicity                                      |
| A16931 | Acute Toxicity                                      |
| A16932 | Acute Toxicity                                      |
| A16933 | Acute Toxicity                                      |
| A16934 | Acute Toxicity, Multiple Dose Effects               |
| A16935 | Skin and Eye Irritation                             |
| A16936 | Acute Toxicity, Multiple Dose Effects               |
| A16937 | Acute Toxicity                                      |
| A16938 | Acute Toxicity, Mutagenicity, Multiple Dose Effects |
| A16939 | Acute Toxicity                                      |
| A16940 | Reproductive Effects                                |
| A16941 | Acute Toxicity                                      |



|        |                                                             |
|--------|-------------------------------------------------------------|
| A16942 | Acute Toxicity                                              |
| A16943 | Non-toxicity                                                |
| A16944 | Multiple Dose Effects                                       |
| A16945 | Acute Toxicity                                              |
| A16946 | Skin and Eye Irritation                                     |
| A16947 | Acute Toxicity                                              |
| A16948 | Acute Toxicity                                              |
| A16949 | Acute Toxicity                                              |
| A16950 | Acute Toxicity                                              |
| A16951 | Mutagenicity, Tumorigenicity, Multiple Dose Effects         |
| A16952 | Acute Toxicity                                              |
| A16953 | Acute Toxicity                                              |
| A16954 | Multiple Dose Effects                                       |
| A16955 | Multiple Dose Effects                                       |
| A16956 | Multiple Dose Effects                                       |
| A16957 | Multiple Dose Effects                                       |
| A16958 | Acute Toxicity                                              |
| A16959 | Acute Toxicity, Tumorigenicity, Reproductive Effects        |
| A16960 | Acute Toxicity                                              |
| A16961 | Acute Toxicity                                              |
| A16962 | Acute Toxicity                                              |
| A16963 | Acute Toxicity, Mutagenicity                                |
| A16964 | Acute Toxicity                                              |
| A16965 | Acute Toxicity                                              |
| A16966 | Acute Toxicity                                              |
| A16967 | Acute Toxicity                                              |
| A16968 | Acute Toxicity, Reproductive Effects, Multiple Dose Effects |
| A16969 | Multiple Dose Effects                                       |
| A16970 | Acute Toxicity                                              |
| A16971 | Multiple Dose Effects                                       |
| A16972 | Acute Toxicity, Multiple Dose Effects                       |
| A16973 | Acute Toxicity, Multiple Dose Effects                       |
| A16974 | Multiple Dose Effects                                       |
| A16975 | Acute Toxicity                                              |
| A16976 | Acute Toxicity                                              |
| A16977 | Reproductive Effects                                        |
| A16978 | Acute Toxicity                                              |
| A16979 | Acute Toxicity, Multiple Dose Effects                       |
| A16980 | Acute Toxicity                                              |
| A16981 | Mutagenicity                                                |
| A16982 | Reproductive Effects                                        |
| A16983 | Tumorigenicity                                              |
| A16984 | Acute Toxicity, Reproductive Effects, Multiple Dose Effects |
| A16985 | Mutagenicity                                                |
| A16986 | Acute Toxicity                                              |
| A16987 | Acute Toxicity, Mutagenicity, Multiple Dose Effects         |

|        |                                                                    |
|--------|--------------------------------------------------------------------|
| A16988 | Mutagenicity                                                       |
| A16989 | Non-toxicity                                                       |
| A16990 | Non-toxicity                                                       |
| A16991 | Non-toxicity                                                       |
| A16992 | Acute Toxicity, Multiple Dose Effects                              |
| A16993 | Non-toxicity                                                       |
| A16994 | Reproductive Effects                                               |
| A16995 | Non-toxicity                                                       |
| A16996 | Multiple Dose Effects                                              |
| A16997 | Acute Toxicity                                                     |
| A16998 | Acute Toxicity                                                     |
| A16999 | Acute Toxicity, Reproductive Effects, Multiple Dose Effects        |
| A17000 | Acute Toxicity                                                     |
| A17001 | Mutagenicity                                                       |
| A17002 | Acute Toxicity                                                     |
| A17003 | Acute Toxicity, Reproductive Effects, Multiple Dose Effects        |
| A17004 | Acute Toxicity, Mutagenicity                                       |
| A17005 | Reproductive Effects                                               |
| A17006 | Reproductive Effects, Multiple Dose Effects                        |
| A17007 | Multiple Dose Effects                                              |
| A17008 | Multiple Dose Effects                                              |
| A17009 | Acute Toxicity, Mutagenicity, Tumorigenicity, Reproductive Effects |
| A17010 | Acute Toxicity                                                     |
| A17011 | Multiple Dose Effects                                              |
| A17012 | Acute Toxicity, Multiple Dose Effects                              |
| A17013 | Multiple Dose Effects                                              |
| A17014 | Multiple Dose Effects                                              |
| A17015 | Non-toxicity                                                       |
| A17016 | Acute Toxicity                                                     |
| A17017 | Acute Toxicity                                                     |
| A17018 | Multiple Dose Effects                                              |
| A17019 | Acute Toxicity                                                     |
| A17020 | Acute Toxicity, Mutagenicity                                       |
| A17021 | Acute Toxicity, Multiple Dose Effects                              |
| A17022 | Acute Toxicity                                                     |
| A17023 | Acute Toxicity                                                     |
| A17024 | Acute Toxicity                                                     |
| A17025 | Multiple Dose Effects                                              |
| A17026 | Acute Toxicity                                                     |
| A17027 | Acute Toxicity                                                     |
| A17028 | Acute Toxicity                                                     |
| A17029 | Acute Toxicity, Multiple Dose Effects                              |
| A17030 | Acute Toxicity, Multiple Dose Effects                              |
| A17031 | Acute Toxicity                                                     |
| A17032 | Non-toxicity                                                       |
| A17033 | Multiple Dose Effects                                              |

|        |                                                                     |
|--------|---------------------------------------------------------------------|
| A17034 | Multiple Dose Effects                                               |
| A17035 | Acute Toxicity, Multiple Dose Effects                               |
| A17036 | Acute Toxicity, Reproductive Effects, Multiple Dose Effects         |
| A17037 | Acute Toxicity, Reproductive Effects                                |
| A17038 | Multiple Dose Effects                                               |
| A17039 | Multiple Dose Effects                                               |
| A17040 | Acute Toxicity, Reproductive Effects, Multiple Dose Effects         |
| A17041 | Acute Toxicity, Reproductive Effects, Multiple Dose Effects         |
| A17042 | Acute Toxicity                                                      |
| A17043 | Reproductive Effects, Multiple Dose Effects                         |
| A17044 | Acute Toxicity                                                      |
| A17045 | Multiple Dose Effects                                               |
| A17046 | Multiple Dose Effects                                               |
| A17047 | Multiple Dose Effects                                               |
| A17048 | Acute Toxicity, Multiple Dose Effects                               |
| A17049 | Acute Toxicity                                                      |
| A17050 | Acute Toxicity                                                      |
| A17051 | Acute Toxicity, Reproductive Effects, Multiple Dose Effects         |
| A17052 | Tumorigenicity                                                      |
| A17053 | Tumorigenicity, Multiple Dose Effects                               |
| A17054 | Acute Toxicity                                                      |
| A17055 | Acute Toxicity, Reproductive Effects, Multiple Dose Effects         |
| A17056 | Acute Toxicity                                                      |
| A17057 | Multiple Dose Effects                                               |
| A17058 | Multiple Dose Effects                                               |
| A17059 | Non-toxicity                                                        |
| A17060 | Non-toxicity                                                        |
| A17061 | Mutagenicity, Tumorigenicity, Reproductive Effects                  |
| A17062 | Reproductive Effects                                                |
| A17063 | Acute Toxicity, Mutagenicity                                        |
| A17064 | Acute Toxicity                                                      |
| A17065 | Multiple Dose Effects                                               |
| A17066 | Acute Toxicity                                                      |
| A17067 | Acute Toxicity                                                      |
| A17068 | Acute Toxicity                                                      |
| A17069 | Acute Toxicity                                                      |
| A17070 | Acute Toxicity                                                      |
| A17071 | Acute Toxicity, Multiple Dose Effects                               |
| A17072 | Acute Toxicity                                                      |
| A17073 | Acute Toxicity                                                      |
| A17074 | Mutagenicity                                                        |
| A17075 | Acute Toxicity                                                      |
| A17076 | Acute Toxicity                                                      |
| A17077 | Acute Toxicity                                                      |
| A17078 | Acute Toxicity, Mutagenicity, Tumorigenicity, Reproductive Effects, |
| A17079 | Acute Toxicity, Reproductive Effects, Multiple Dose Effects         |

|        |                                                                             |
|--------|-----------------------------------------------------------------------------|
| A17080 | Mutagenicity, Tumorigenicity                                                |
| A17081 | Acute Toxicity                                                              |
| A17082 | Acute Toxicity                                                              |
| A17083 | Mutagenicity, Tumorigenicity                                                |
| A17084 | Acute Toxicity                                                              |
| A17085 | Acute Toxicity, Mutagenicity, Tumorigenicity                                |
| A17086 | Acute Toxicity, Mutagenicity                                                |
| A17087 | Acute Toxicity                                                              |
| A17088 | Acute Toxicity                                                              |
| A17089 | Acute Toxicity, Reproductive Effects, Multiple Dose Effects                 |
| A17090 | Mutagenicity                                                                |
| A17091 | Mutagenicity, Reproductive Effects                                          |
| A17092 | Acute Toxicity, Reproductive Effects, Multiple Dose Effects                 |
| A17093 | Non-toxicity                                                                |
| A17094 | Non-toxicity                                                                |
| A17095 | Acute Toxicity                                                              |
| A17096 | Mutagenicity                                                                |
| A17097 | Multiple Dose Effects                                                       |
| A17098 | Acute Toxicity                                                              |
| A17099 | Acute Toxicity, Mutagenicity                                                |
| A17100 | Acute Toxicity, Mutagenicity                                                |
| A17101 | Acute Toxicity, Mutagenicity                                                |
| A17102 | Non-toxicity                                                                |
| A17103 | Acute Toxicity                                                              |
| A17104 | Acute Toxicity                                                              |
| A17105 | Acute Toxicity                                                              |
| A17106 | Acute Toxicity                                                              |
| A17107 | Multiple Dose Effects                                                       |
| A17108 | Acute Toxicity                                                              |
| A17109 | Non-toxicity                                                                |
| A17110 | Acute Toxicity                                                              |
| A17111 | Acute Toxicity, Multiple Dose Effects                                       |
| A17112 | Acute Toxicity, Multiple Dose Effects                                       |
| A17113 | Tumorigenicity, Multiple Dose Effects                                       |
| A17114 | Acute Toxicity                                                              |
| A17115 | Acute Toxicity, Reproductive Effects                                        |
| A17116 | Multiple Dose Effects                                                       |
| A17117 | Acute Toxicity                                                              |
| A17118 | Multiple Dose Effects                                                       |
| A17119 | Acute Toxicity                                                              |
| A17120 | Multiple Dose Effects                                                       |
| A17121 | Acute Toxicity, Reproductive Effects, Multiple Dose Effects                 |
| A17122 | Acute Toxicity, Tumorigenicity, Reproductive Effects, Multiple Dose Effects |
| A17123 | Acute Toxicity, Mutagenicity, Reproductive Effects, Multiple Dose Effects   |
| A17124 | Acute Toxicity, Mutagenicity, Tumorigenicity, Skin and Eye Irritation,      |
| A17125 | Acute Toxicity, Tumorigenicity, Multiple Dose Effects                       |

|        |                                             |
|--------|---------------------------------------------|
| A17126 | Acute Toxicity, Reproductive Effects        |
| A17127 | Acute Toxicity                              |
| A17128 | Acute Toxicity, Multiple Dose Effects       |
| A17129 | Reproductive Effects                        |
| A17130 | Reproductive Effects, Multiple Dose Effects |
| A17131 | Acute Toxicity                              |
| A17132 | Acute Toxicity                              |
| A17133 | Acute Toxicity                              |
| A17134 | Acute Toxicity                              |
| A17135 | Acute Toxicity                              |
| A17136 | Acute Toxicity                              |
| A17137 | Acute Toxicity                              |
| A17138 | Acute Toxicity                              |
| A17139 | Acute Toxicity                              |
| A17140 | Acute Toxicity                              |
| A17141 | Acute Toxicity                              |
| A17142 | Acute Toxicity                              |
| A17143 | Acute Toxicity, Multiple Dose Effects       |
| A17144 | Acute Toxicity                              |
| A17145 | Acute Toxicity                              |
| A17146 | Acute Toxicity                              |
| A17147 | Skin and Eye Irritation                     |
| A17148 | Acute Toxicity                              |
| A17149 | Acute Toxicity                              |
| A17150 | Acute Toxicity                              |
| A17151 | Mutagenicity                                |
| A17152 | Reproductive Effects                        |
| A17153 | Acute Toxicity                              |
| A17154 | Acute Toxicity                              |
| A17155 | Mutagenicity, Tumorigenicity                |
| A17156 | Acute Toxicity                              |
| A17157 | Mutagenicity                                |
| A17158 | Acute Toxicity, Multiple Dose Effects       |
| A17159 | Acute Toxicity                              |
| A17160 | Non-toxicity                                |
| A17161 | Acute Toxicity, Multiple Dose Effects       |
| A17162 | Non-toxicity                                |
| A17163 | Acute Toxicity                              |
| A17164 | Non-toxicity                                |
| A17165 | Non-toxicity                                |
| A17166 | Skin and Eye Irritation                     |
| A17167 | Skin and Eye Irritation                     |
| A17168 | Acute Toxicity, Mutagenicity                |
| A17169 | Reproductive Effects                        |
| A17170 | Acute Toxicity                              |
| A17171 | Acute Toxicity, Multiple Dose Effects       |

|        |                                       |
|--------|---------------------------------------|
| A17172 | Acute Toxicity                        |
| A17173 | Acute Toxicity, Multiple Dose Effects |
| A17174 | Mutagenicity                          |
| A17175 | Acute Toxicity, Mutagenicity          |
| A17176 | Acute Toxicity                        |
| A17177 | Acute Toxicity                        |
| A17178 | Acute Toxicity                        |
| A17179 | Acute Toxicity                        |
| A17180 | Acute Toxicity                        |
| A17181 | Acute Toxicity                        |
| A17182 | Multiple Dose Effects                 |
| A17183 | Mutagenicity                          |
| A17184 | Multiple Dose Effects                 |
| A17185 | Acute Toxicity                        |
| A17186 | Acute Toxicity                        |
| A17187 | Non-toxicity                          |
| A17188 | Non-toxicity                          |
| A17189 | Non-toxicity                          |
| A17190 | Multiple Dose Effects                 |
| A17191 | Acute Toxicity                        |
| A17192 | Acute Toxicity                        |
| A17193 | Acute Toxicity                        |
| A17194 | Acute Toxicity                        |
| A17195 | Non-toxicity                          |
| A17196 | Tumorigenicity                        |
| A17197 | Acute Toxicity                        |
| A17198 | Mutagenicity, Tumorigenicity          |
| A17199 | Acute Toxicity                        |
| A17200 | Acute Toxicity                        |
| A17201 | Acute Toxicity                        |
| A17202 | Acute Toxicity                        |
| A17203 | Acute Toxicity                        |
| A17204 | Acute Toxicity                        |
| A17205 | Acute Toxicity                        |
| A17206 | Acute Toxicity                        |
| A17207 | Acute Toxicity                        |
| A17208 | Acute Toxicity                        |
| A17209 | Mutagenicity                          |
| A17210 | Multiple Dose Effects                 |
| A17211 | Acute Toxicity, Multiple Dose Effects |
| A17212 | Non-toxicity                          |
| A17213 | Acute Toxicity                        |
| A17214 | Non-toxicity                          |
| A17215 | Non-toxicity                          |
| A17216 | Non-toxicity                          |
| A17217 | Non-toxicity                          |

|        |                              |
|--------|------------------------------|
| A17218 | Multiple Dose Effects        |
| A17219 | Acute Toxicity               |
| A17220 | Multiple Dose Effects        |
| A17221 | Acute Toxicity               |
| A17222 | Non-toxicity                 |
| A17223 | Acute Toxicity, Mutagenicity |
| A17224 | Non-toxicity                 |
| A17225 | Acute Toxicity               |
| A17226 | Acute Toxicity               |
| A17227 | Acute Toxicity               |
| A17228 | Acute Toxicity               |
| A17229 | Acute Toxicity               |
| A17230 | Acute Toxicity               |
| A17231 | Acute Toxicity               |
| A17232 | Non-toxicity                 |
| A17233 | Non-toxicity                 |
